# Supplementary material for: A systematic approach to identify recycling endocytic cargo depending on the GARP complex
Source: eLife. 2019 Jan 29;8:e42837. doi: 10.7554/eLife.42837 (PMC6374077; doi:10.7554/eLife.42837)
Supplement: Figure 3—source data 1. [file elife-42837-fig3-data1.xlsx]

## Sheet: Vakuoles_vs_Cell_lysates
Gene.names	Number.of.proteins	Peptides	Unique.peptides	Sequence.coverage....	Mol..weight..kDa.	Ratio.H.L.normalized	Intensity	Intensity.L	Intensity.H
PFF1	1	13	13	17	111.03	0.0030724	1754800000	1706100000	48728000
VTC1	1	4	4	17.8	14.371	0.0041225	3428200000	3389800000	38476000
PHO8	2	12	12	24.2	63.003	0.0042462	3463800000	3160500000	303300000
VPH1	1	11	11	22.5	95.528	0.0042538	4914500000	4852200000	62344000
PHO91	1	17	17	20.7	99.489	0.0047725	3040700000	2918300000	122350000
VTC3	1	32	31	51	96.552	0.0049083	3659700000	3461200000	198410000
YCK3	1	14	14	46.4	60.26	0.0049518	2713600000	2648800000	64833000
VTC4	1	32	32	46.5	83.154	0.0052172	3313600000	3153900000	159720000
YBT1	2	34	34	26.1	189.16	0.0054584	2564600000	2445800000	118780000
VTC2	1	34	33	44	95.44	0.0058012	5356600000	5208100000	148530000
CCC1	1	3	3	6.5	34.249	0.0065477	724660000	707290000	17376000
FET5	1	7	7	17.5	70.879	0.0068626	3639900000	3564700000	75136000
DAP2	1	18	18	30.9	93.403	0.006867	1928300000	1764000000	164270000
VMA6	1	6	6	37.1	39.79	0.0070204	1641100000	1605300000	35855000
VAC8	1	14	14	41.2	63.207	0.007665	2700200000	2630900000	69304000
NYV1	1	6	6	40.3	28.964	0.0082789	849530000	813170000	36354000
YPT7	1	5	5	34.1	23.042	0.0093249	1223500000	1194100000	29398000
ZRC1	1	2	2	8.1	48.344	0.010143	193180000	190420000	2760100
YVC1	1	6	6	15	77.952	0.010555	536420000	516830000	19596000
CDC42	1	4	4	22	21.322	0.010565	1171200000	1106500000	64699000
VMA11	1	1	1	11	17.037	0.01061	75234000	74026000	1208300
ATG27	1	13	13	50.6	30.201	0.01144	1651100000	1595400000	55710000
APE3	1	27	27	56.8	60.137	0.011754	19585000000	19001000000	583590000
VAM3	1	8	8	45.9	32.497	0.012722	521530000	471440000	50090000
RHO1	1	4	4	29.7	23.152	0.013249	3158800000	3058000000	100830000
RMD1	1	10	10	37.4	49.931	0.013944	576900000	553940000	22967000
SMF3	1	4	4	12.7	51.775	0.014013	64532000	63448000	1083300
PRC1	1	15	15	45.7	59.801	0.014791	3774500000	3539200000	235280000
PRB1	1	8	8	19.2	69.621	0.014796	2550300000	2451200000	99123000
APE1	1	17	17	40.5	57.092	0.014907	1300700000	1228500000	72156000
VNX1	1	7	7	11.3	102.5	0.01645	168540000	141760000	26781000
ZRT3	1	5	5	19.3	55.402	0.016528	429010000	420010000	9006700
FTH1	1	4	4	11.6	51.419	0.016605	155980000	141960000	14022000
YPS1	1	3	3	4.4	60.009	0.017289	58926000	56224000	2701500
PEP4	1	16	16	51.9	44.498	0.017842	7971900000	7594800000	377110000
VMA10	1	5	5	38.6	12.713	0.018147	283110000	273060000	10050000
AVT4	1	3	3	9.7	80.025	0.018547	76078000	70051000	6026600
AVT7	1	2	2	5.5	53.736	0.018566	83913000	78440000	5473500
VMA1	1	39	39	62.3	118.64	0.019459	18189000000	17229000000	960620000
RTC5	1	10	10	23.5	64.294	0.020273	265400000	253940000	11469000
ECM14	1	7	7	21.4	49.829	0.020385	532390000	496960000	35426000
TCO89	1	9	9	18	88.844	0.020563	176190000	154690000	21498000
FMP42	1	4	4	7.1	56.177	0.020655	203210000	193130000	10087000
VMA4	1	17	17	85.4	26.471	0.020675	4528500000	4301100000	227420000
CSC1	1	4	4	6.9	89.342	0.021172	131460000	124660000	6802800
YLR173W	1	4	4	7.2	69.605	0.02124	51354000	48394000	2959800
KRE6	1	3	3	10.8	80.122	0.021765	168510000	158750000	9761600
FAA1	1	36	35	59.1	77.865	0.022021	9174200000	8693800000	480340000
VAM6	1	8	8	11.6	122.88	0.022292	58819000	55960000	2859000
ADP1	1	16	16	17.3	117.23	0.022652	1317800000	1225300000	92518000
MRL1	1	2	2	2.9	42.706	0.022889	97914000	91882000	6031600
TCB3	1	42	42	38.8	171.07	0.023508	1547400000	1428400000	118990000
EHT1	1	16	16	51	51.255	0.023655	972930000	887880000	85044000
YDR415C	1	3	3	8.8	42.484	0.02431	162400000	148260000	14139000
	1	15	15	35.2	95.096	0.024336	336280000	256060000	80220000
GTT1	1	8	8	43.6	26.794	0.024597	424850000	396060000	28789000
VMA13	1	17	17	42.9	54.415	0.024876	2238600000	2085800000	152800000
	1	14	14	54.6	37.15	0.02562	1346100000	1204100000	141990000
VMA8	1	6	6	29.3	29.194	0.025881	785840000	732240000	53591000
YPR063C	1	4	4	34.3	15.441	0.025941	339120000	320260000	18857000
YJU3	1	9	9	41.9	35.562	0.025979	1130400000	1021800000	108620000
	1	6	6	14.4	74.038	0.026372	374880000	360790000	14096000
TCB1	1	25	25	29.6	133.57	0.026467	613980000	537790000	76192000
YCF1	1	21	20	19.1	171.12	0.026873	1274300000	1171000000	103360000
	1	4	4	17.2	42.957	0.027338	349050000	326330000	22720000
BGL2	1	9	9	51.1	34.118	0.027731	3305800000	3105800000	199990000
PEP5	1	7	7	9.2	117.48	0.027776	120330000	112880000	7454400
MNR2	1	9	9	16.7	109.74	0.027826	311350000	271340000	40008000
	1	9	9	29.7	47.093	0.028097	1368400000	1250700000	117620000
VMA2	1	21	21	47.2	57.749	0.028107	5942800000	5517400000	425330000
ECM21	1	8	8	11.2	123.61	0.028355	189340000	172800000	16545000
PPN1	1	13	13	33.1	78.343	0.028442	368660000	353030000	15631000
SEC66	1	7	7	36.4	24.231	0.028673	733000000	669490000	63517000
YPT10	1	6	6	37.2	21.834	0.029333	130190000	118990000	11200000
SLG1	1	1	1	3.7	39.27	0.02956	189290000	178600000	10697000
YML020W	1	12	12	24.7	76.137	0.029769	192000000	180920000	11086000
VAC7	1	3	3	3.4	128.14	0.02999	32173000	28389000	3783900
PMC1	1	35	35	40.2	130.86	0.030302	1614400000	1479200000	135230000
SWP1	1	6	6	18.5	31.653	0.030368	128570000	118740000	9829300
IRC22	1	3	3	5.8	24.992	0.030706	912450000	841830000	70620000
	1	8	8	16.2	97.617	0.030866	147360000	130940000	16420000
MPD1	1	10	10	36.5	36.408	0.031166	222230000	198580000	23644000
SEC62	1	8	8	36.5	31.346	0.031408	590820000	543500000	47326000
VMA5	1	20	20	61	44.188	0.031766	999310000	911740000	87570000
LRO1	1	9	9	18.5	75.392	0.031821	177230000	157400000	19826000
	1	6	6	17.1	57.638	0.031863	391210000	363920000	27292000
SCJ1	1	6	6	19.9	41.543	0.032158	314910000	289210000	25706000
TYW1	1	15	15	27.3	89.804	0.032234	325270000	251880000	73385000
LCB4	1	20	20	45	69.639	0.032317	610000000	545940000	64059000
COS9	1	2	2	5.4	48.544	0.032335	5558800	5186500	372240
WBP1	1	6	6	25.3	49.391	0.03257	1062500000	970350000	92151000
PEX14	1	3	3	10.6	38.42	0.033115	26761000	24968000	1793500
NPC2	1	5	5	32.4	19.063	0.033159	98851000	91732000	7119500
SLC1	1	10	10	38.3	33.887	0.033374	399310000	358510000	40797000
CAB5	1	2	2	8.3	27.339	0.033445	24807000	22388000	2418600
RMD8	1	7	7	19.6	75.913	0.033454	277540000	251620000	25923000
MSC7	1	17	17	42.2	71.32	0.033929	1093600000	927980000	165650000
SNL1	1	5	5	43.4	18.306	0.034336	342610000	303680000	38928000
VMA3	1	2	2	31.9	16.35	0.034404	205390000	202460000	2925200
OST1	1	7	7	23.9	54.071	0.034417	392640000	358500000	34134000
PIB2	1	7	7	18.1	70.616	0.034465	152230000	143200000	9026900
SHR3	1	2	2	7.6	23.512	0.034548	271300000	227640000	43665000
FRA1	1	12	12	27.6	84.923	0.034661	1194200000	1013900000	180300000
UTR2	1	2	2	6.9	49.906	0.034691	18329000	17277000	1051900
VHC1	1	10	10	10.4	124	0.034881	392970000	301760000	91210000
LHS1	1	18	18	30.9	99.57	0.03507	810070000	697700000	112370000
KAR2	1	30	30	43.8	74.467	0.035193	10926000000	9862100000	1063700000
PMT2	1	7	7	19.5	86.869	0.035275	1494100000	1364400000	129730000
CPR5	1	8	8	51.1	25.326	0.035345	1416100000	1261000000	155160000
PMT1	1	10	10	14.8	92.674	0.035594	910460000	826250000	84212000
PDR16	1	11	11	34.5	40.713	0.036047	712460000	596060000	116400000
EMC1	1	9	9	13.3	87.18	0.036156	276020000	246740000	29276000
FMP52	1	9	9	69.3	25.086	0.036817	375370000	328570000	46800000
ELO2	1	2	2	4.9	40.002	0.036859	58067000	53911000	4156500
YPR091C	1	9	9	20.6	87.323	0.036999	96987000	88792000	8195100
DPL1	1	13	13	42.4	65.565	0.037327	408830000	353580000	55246000
SPC3	1	5	5	32.1	21.349	0.03737	402680000	365300000	37385000
CRP1	1	18	18	32	51.115	0.037463	2018100000	1687100000	331060000
EUG1	1	13	13	37.1	58.981	0.037813	968740000	717900000	250830000
MPD2	1	7	7	31	32.401	0.037855	339450000	306130000	33325000
CWH41	1	12	12	21.7	96.506	0.03791	370590000	313200000	57393000
PDI1	1	26	26	67.6	58.226	0.038174	9464400000	8576700000	887710000
AYR1	1	1	1	4	32.814	0.038211	94603000	83457000	11146000
CHO2	1	11	11	18.6	101.2	0.03831	207240000	182840000	24407000
SYG1	1	7	7	10.5	104.22	0.038351	212260000	199260000	13002000
PHO88	1	13	13	66	21.137	0.038381	2641400000	2378100000	263300000
SHE10	1	13	13	28.2	66.862	0.038646	588270000	531000000	57271000
ALG12	1	3	3	5.6	62.672	0.03893	42924000	38766000	4158000
TSC13	1	3	3	11.3	36.767	0.038939	144410000	132230000	12182000
GTB1	1	12	12	27.8	79.907	0.039521	184770000	164330000	20444000
TED1	1	6	6	16.5	54.927	0.039617	355060000	312940000	42122000
OSH6	1	18	18	46.9	51.587	0.039808	818920000	639070000	179850000
HMG1	1	16	13	17.6	115.62	0.039899	652310000	532600000	119700000
SEC63	1	26	26	48.7	75.344	0.039906	2373500000	2131500000	241990000
JEM1	1	8	8	15.2	75.143	0.039932	132830000	108960000	23865000
LIP1	1	2	2	14	17.206	0.040118	242330000	219800000	22526000
ERG5	1	17	17	39	61.334	0.040438	802400000	640190000	162210000
YSY6	1	1	1	20	7.3647	0.040505	454250000	410550000	43699000
ERG27	1	10	10	33.1	39.724	0.040572	337570000	302780000	34793000
YHR202W	1	6	6	12.5	68.997	0.040876	55070000	51067000	4002400
ERG6	1	16	16	44.9	43.43	0.040945	2088700000	1886300000	202360000
VPS62	1	6	6	16.1	54.515	0.041104	343520000	328710000	14812000
SOP4	1	5	5	22.6	26.597	0.041313	484970000	403820000	81149000
GPI16	1	2	2	5.6	68.771	0.041375	84062000	76590000	7471300
FPR2	1	2	2	17.8	14.487	0.042086	99179000	87502000	11677000
ANR2	1	6	6	16.5	58.894	0.042887	88728000	79558000	9170400
SUR2	1	7	7	16.6	40.734	0.043124	228940000	185060000	43878000
CBR1	1	12	12	52.1	31.493	0.043501	1501100000	1347500000	153570000
IST2	1	9	9	11.9	105.85	0.04362	249940000	213020000	36927000
MCD4	1	4	4	6.7	105.69	0.044281	79632000	63520000	16112000
IVY1	1	6	6	24.5	49.975	0.044283	100370000	92902000	7464700
CPS1	1	13	13	23.3	64.596	0.044795	1244100000	1121400000	122700000
APE4	1	13	13	36.9	54.173	0.044871	388300000	343400000	44897000
MAM3	1	7	7	22.1	77.711	0.045097	338900000	327930000	10974000
ERG11	1	12	12	32.8	60.719	0.045101	1539900000	1365100000	174810000
LAG1	1	3	3	8.3	48.454	0.045102	28804000	25872000	2932100
HLJ1	1	2	2	10.7	25.008	0.045122	155560000	140800000	14766000
ERJ5	1	3	3	14.2	34.191	0.045364	45402000	39192000	6209600
ELO3	1	4	4	16.5	39.465	0.04587	345100000	291380000	53721000
PCS60	1	10	10	33.7	60.488	0.045886	443230000	384770000	58461000
MSC1	1	25	25	57.5	59.588	0.046049	2383500000	2135700000	247810000
GSF2	1	9	9	32.8	45.869	0.046065	703060000	611410000	91650000
PET10	1	12	12	56.2	31.246	0.046421	1253700000	1098800000	154940000
PBN1	1	4	4	15.4	47.923	0.046472	98196000	85930000	12266000
SSS1	1	1	1	22.5	8.9435	0.046782	693060000	641390000	51667000
TGL4	1	3	3	4.6	102.72	0.046916	22406000	19985000	2421100
ERG7	1	6	6	9.8	83.459	0.047006	100830000	93490000	7344100
PIS1	1	1	1	5.5	24.823	0.047031	40976000	36252000	4724000
LAP3	1	11	11	30.8	55.482	0.047038	538570000	431490000	107080000
ERG24	1	2	2	3.4	50.615	0.047063	37815000	33514000	4301000
ERP3	1	2	2	9.8	26.511	0.047225	37948000	30616000	7331800
SAC1	1	13	13	26.8	71.124	0.047459	452730000	396830000	55898000
EAR1	1	2	2	5.3	62.531	0.047551	24438000	21059000	3378400
SRP101	1	22	22	49	69.277	0.047783	767280000	674640000	92640000
DOP1	1	6	6	4.1	194.69	0.047862	40541000	36192000	4348600
SPC2	1	4	4	28.1	20.802	0.048042	122320000	109500000	12816000
SPF1	1	11	11	13.9	135.27	0.048176	271550000	232130000	39423000
SEC17	1	12	12	61.6	32.802	0.048466	498790000	423350000	75441000
PCT1	1	8	8	24.3	49.406	0.048549	266630000	224200000	42439000
	1	7	7	11.3	106.13	0.048983	73875000	67315000	6560200
	1	5	5	22.9	22.769	0.049037	213800000	197140000	16659000
	1	2	2	24.2	14.617	0.049139	57655000	52003000	5651900
ERG9	1	11	11	33.1	51.719	0.049185	611120000	532590000	78526000
KOG1	1	22	22	20.2	177.61	0.049218	544040000	489090000	54949000
SEC4	1	7	7	46	23.505	0.049248	466620000	414000000	52616000
VMA7	1	3	3	44.9	13.461	0.049428	145060000	120490000	24564000
	1	20	20	28.8	98.711	0.049832	681000000	559300000	121710000
ERG3	1	6	6	18.1	42.73	0.049839	571650000	501450000	70195000
OSW7	1	5	5	14.5	59.359	0.049973	47409000	41631000	5778700
VPS21	1	3	3	16.7	23.081	0.050222	170420000	151270000	19157000
YPT32	1	9	8	62.2	24.52	0.050535	376710000	327900000	48813000
VMA22	1	6	6	59.1	21.077	0.050538	115010000	101160000	13851000
ERO1	1	13	13	31.1	65.032	0.050652	639000000	503070000	135930000
PEP1	1	27	27	26.6	177.78	0.050664	472150000	404200000	67946000
LCB2	1	5	5	14.6	63.11	0.050893	230800000	199130000	31676000
ERG2	1	1	1	5.4	24.895	0.050911	184240000	160340000	23901000
LOA1	1	4	4	19	33.816	0.051283	58819000	51800000	7019500
ERG1	1	8	8	20.8	55.125	0.051908	656000000	579490000	76508000
DIP5	1	2	2	3.5	68.097	0.052304	36522000	32528000	3994100
ERG26	1	10	10	34.4	38.706	0.053322	417000000	299290000	117700000
CWP1	1	6	6	31.8	24.268	0.053428	346190000	301650000	44542000
SIL1	1	8	8	25.2	48.274	0.053864	168630000	146960000	21668000
BPT1	2	17	16	15.1	176.87	0.053876	459360000	400720000	58648000
SEC12	1	6	6	24.2	51.607	0.053957	175530000	157090000	18434000
LNP1	1	4	4	17.6	32.062	0.05414	51748000	46447000	5301200
ATG8	1	5	5	40.2	13.627	0.054234	72322000	60419000	11903000
BZZ1	1	15	15	34	71.17	0.054281	311210000	228770000	82435000
BIG1	1	4	4	17	39.068	0.054361	91392000	79805000	11587000
MDH3	1	9	9	40.8	37.186	0.054508	612780000	534810000	77965000
VTI1	1	2	2	14.3	24.668	0.054721	52882000	46540000	6342500
SRP102	1	5	5	41	26.974	0.055538	91280000	55258000	36022000
LCL2	1	2	2	19.8	14.922	0.056282	27563000	24010000	3552700
YPT31	1	9	8	62.3	24.469	0.056286	701820000	583830000	117980000
OSM1	1	9	9	32.7	55.064	0.056604	122440000	108560000	13888000
PGA3	1	2	2	15.1	35.287	0.057073	80480000	72144000	8335200
VPS33	1	3	3	6.2	79.27	0.058176	52646000	47233000	5413700
IFA38	1	6	6	26.5	38.708	0.058353	108980000	93514000	15465000
BAP2	1	3	3	7.2	67.769	0.058658	70767000	61826000	8940200
FAR10	1	3	3	7.7	54.092	0.058958	18423000	15267000	3156000
RNY1	1	10	10	45.9	50.171	0.059201	281310000	269990000	11326000
VCX1	1	1	1	4.9	44.646	0.059371	117640000	109020000	8621300
ZEO1	1	12	12	58.4	12.589	0.059656	1713400000	1475000000	238410000
YKL077W	1	4	4	13.5	46.036	0.060406	255710000	215900000	39808000
NCP1	1	15	15	39.2	76.771	0.060699	509640000	427530000	82106000
SLM4	1	5	5	40.1	18.354	0.060712	375790000	99520000	276270000
GIS4	1	3	3	7.1	87.138	0.060788	33776000	31535000	2241600
ZRT1	1	4	4	8.5	41.581	0.06173	466270000	403570000	62706000
YGR266W	1	7	7	17.8	81.19	0.06198	68039000	57985000	10054000
SRC1	1	3	3	4.7	95.496	0.062238	82722000	72750000	9971500
OST2	1	1	1	13.1	14.697	0.062842	33916000	28994000	4922300
LCB1	1	9	9	23.3	62.206	0.062975	306950000	274930000	32019000
HFD1	1	11	11	28.9	59.978	0.062978	237410000	207290000	30129000
STE24	1	4	4	9.7	52.323	0.063265	111210000	91278000	19928000
AMS1	1	17	17	25.3	124.5	0.063643	300760000	218460000	82299000
CTS1	1	2	2	3.6	59.014	0.064022	36995000	32924000	4071100
MNS1	1	10	10	31	63.057	0.065093	114660000	101010000	13650000
GPT2	1	11	11	20.5	83.644	0.065361	236810000	204330000	32474000
CDS1	1	5	5	9.2	51.822	0.065591	1464200000	825200000	639020000
ERG25	1	3	3	13.9	36.479	0.065692	59440000	51587000	7852600
GAP1	1	2	2	4.5	65.655	0.065818	20585000	18938000	1646800
GPA1	1	9	9	29.2	54.075	0.066045	229980000	190770000	39208000
RGI2	1	2	2	17.7	19.229	0.066663	7925300	6778300	1147000
EMC2	1	2	2	9.6	33.855	0.066718	42279000	37680000	4598700
AIM6	1	7	7	28.2	44.382	0.067286	152430000	101170000	51258000
YET1	1	6	6	19.4	23.459	0.067374	179860000	150670000	29187000
ALG9	1	4	4	8.5	63.776	0.06778	40229000	35131000	5098900
YDL180W	1	3	3	11.5	62.287	0.068071	69389000	67708000	1681000
RSR1	1	2	2	8.8	30.39	0.068287	93119000	80580000	12539000
NPR1	1	3	3	7.3	85.989	0.068502	33023000	29310000	3713400
RHO5	1	7	7	21.8	36.818	0.06851	217580000	185050000	32534000
STE18	1	3	3	65.5	12.625	0.069087	91256000	78085000	13171000
	1	6	6	11.8	46.502	0.069667	180070000	155930000	24146000
SEY1	1	18	18	24.6	89.431	0.069735	288930000	241460000	47468000
	1	5	5	28.3	27.921	0.070108	28497000	24572000	3925300
CSR1	1	8	8	34.1	47.462	0.071261	307950000	251020000	56936000
YGL082W	1	3	3	11.8	43.321	0.071465	49252000	42602000	6650200
TUL1	1	3	3	5.8	87.878	0.071803	43044000	39795000	3248900
YOR389W;YPL277C	2	5	5	11.2	70.22	0.071929	94928000	84514000	10414000
FAA4	1	16	14	33.3	77.266	0.072335	451890000	378650000	73235000
NCR1	1	8	8	10.6	132.64	0.072422	134530000	116910000	17613000
KRE9	1	3	3	22.8	29.988	0.072613	86935000	73632000	13303000
YSP2	1	8	8	9.2	160.58	0.072941	109030000	94841000	14191000
SEH1	1	2	2	9.7	39.122	0.073427	42102000	34147000	7954500
GET1	1	6	6	30.6	27.092	0.074017	112950000	97694000	15255000
ECM33	1	4	4	13.5	43.768	0.075153	400530000	334860000	65669000
	1	8	8	17.5	67.524	0.0752	140010000	121000000	19003000
TRM1	1	12	12	30.2	64.052	0.075402	533410000	451110000	82307000
GAS3	1	8	8	28.8	56.793	0.075467	130110000	105060000	25050000
ANT1	1	3	3	11.6	36.367	0.075646	33969000	30480000	3488900
SCS7	1	6	6	21.1	44.881	0.076702	67225000	55949000	11276000
LSB6	1	8	8	13.7	70.216	0.07678	120550000	94934000	25616000
AIM23	1	6	6	25.3	41.461	0.077276	64507000	47907000	16599000
RDI1	1	7	7	57.4	23.138	0.077704	362840000	306080000	56766000
YIM1	1	8	8	24.4	41.637	0.07793	405630000	328200000	77427000
STE4	1	6	6	25.1	46.581	0.077944	132700000	110410000	22284000
KRE5	1	10	10	11.1	156.48	0.078067	49664000	44531000	5133500
NUP60	1	7	7	19.1	59.039	0.078291	164440000	125210000	39229000
AAT2	1	20	20	81.8	46.057	0.078331	1645700000	1364200000	281470000
STE3	1	3	3	5.5	53.708	0.078442	43066000	35620000	7446100
PDR17	1	4	4	18.6	40.677	0.078509	49465000	42097000	7367200
PPZ1	1	6	6	16.2	77.49	0.078981	119120000	106100000	13020000
ALR1	2	4	4	5.7	95.868	0.079009	24008000	19302000	4706600
VAC14	1	2	2	2.8	99.771	0.079239	19112000	16328000	2783800
ERG4	1	4	4	7.2	56.039	0.079242	28119000	23306000	4813700
	1	17	17	41.9	57.821	0.079398	407210000	333180000	74030000
OSH3	1	6	6	8.1	113.76	0.079526	50850000	38801000	12050000
SCW10	1	6	6	18.5	40.469	0.080066	93632000	67830000	25802000
TGL1	1	3	3	8.2	62.978	0.080123	18946000	17313000	1633100
NUP53	1	4	4	14.1	52.618	0.080474	71038000	57263000	13775000
TCB2	1	11	11	13.8	132.51	0.080717	136510000	111430000	25078000
VOA1	1	3	3	24.2	29.678	0.081499	72821000	60945000	11876000
EMP24	1	2	2	16.7	23.332	0.081508	245750000	204920000	40827000
VPS41	1	8	8	11.3	113.41	0.081536	96774000	90218000	6555600
GCV2	1	10	10	15	114.45	0.081588	163320000	132820000	30508000
NUS1	1	5	5	25.3	42.557	0.081948	130500000	112260000	18243000
	1	7	7	9.5	116.97	0.082509	82347000	63748000	18599000
NSG1	1	6	6	18.2	32.214	0.082521	89452000	59668000	29784000
MRH4	1	7	7	18	63.057	0.08272	55057000	42062000	12995000
DID4	1	2	2	7.8	26.29	0.082834	21929000	18535000	3394600
RSM28	1	10	10	46.3	41.215	0.08363	215550000	175340000	40214000
FRE8	1	4	4	7.9	78.948	0.083716	54463000	18672000	35791000
YLR326W	1	2	2	10.8	27.423	0.083795	25314000	20988000	4326300
MDG1	1	6	6	20.8	40.278	0.084039	156030000	121100000	34931000
NUP57	1	9	9	23.8	57.498	0.084111	189700000	153860000	35833000
VPS29	1	5	5	26.2	31.012	0.084349	104010000	86436000	17573000
YOS9	1	5	5	15.9	61.257	0.084406	86775000	73608000	13167000
MHP1	1	5	5	6.7	155.21	0.084598	18585000	17647000	937860
VPH2	1	6	6	39.5	25.286	0.084716	63483000	51115000	12368000
YUR1	1	2	2	7	50.835	0.08487	26218000	22287000	3931000
SBH2	1	2	2	38.6	9.606	0.085197	202730000	176020000	26704000
RSM22	1	3	3	7	72.189	0.085468	38220000	29917000	8302600
PEP12	1	5	5	36.5	33.006	0.085512	22708000	18688000	4019800
AIF1	1	2	2	9	41.335	0.085715	22187000	18721000	3466100
YDR476C	1	3	3	21.9	25.265	0.085763	40220000	33868000	6352000
OLE1	1	8	8	20	58.402	0.085905	172220000	118090000	54138000
MSS116	1	19	19	29.4	76.268	0.086454	588950000	478770000	110180000
ATG19	1	3	3	13.7	47.599	0.086525	44231000	36112000	8119200
NVJ1	1	3	3	12.1	36.421	0.086564	56141000	42727000	13414000
CNE1	1	5	5	17.1	56.967	0.087139	73716000	61885000	11830000
ERP1	1	3	3	18.3	24.723	0.087317	121370000	102770000	18603000
DLD1	1	16	16	40.5	65.292	0.087885	570390000	468260000	102130000
PRX1	1	4	4	21.1	29.495	0.088045	76895000	62563000	14332000
GPI8	1	3	3	17	47.402	0.088161	73693000	55211000	18482000
ERV25	1	1	1	7.6	24.106	0.088571	42887000	34333000	8553600
FET3	1	2	2	5.3	72.359	0.088692	102440000	84988000	17453000
MRPL32	1	3	3	17.5	21.437	0.089378	64165000	51419000	12747000
MGE1	1	7	7	39.9	26.066	0.089695	169300000	131970000	37336000
PMT6	1	5	5	11.3	88.025	0.089803	76206000	64085000	12121000
MRPL25	1	9	9	52.9	18.587	0.089987	127770000	94462000	33313000
GAS5	1	2	2	8.9	51.869	0.090083	63100000	52400000	10700000
PMT4	1	4	4	6.8	87.965	0.09027	38761000	34047000	4713700
VPS1	1	25	25	42.9	78.736	0.090385	2015900000	1568000000	447880000
YME1	1	12	12	25	81.771	0.09042	264690000	195970000	68718000
ERV46	1	5	5	16.6	46.235	0.090558	225650000	170290000	55356000
PTC7	1	7	7	29.2	37.782	0.091602	112310000	92672000	19638000
PET123	1	11	11	48.7	35.998	0.09167	334260000	267680000	66576000
DID2	1	3	3	22.1	23.091	0.092214	64679000	53095000	11584000
NUP1	1	2	2	3.1	113.58	0.09338	24989000	21720000	3269000
UBC6	1	4	4	36	28.383	0.093831	134730000	60279000	74454000
MAE1	1	7	7	16	74.375	0.094049	238880000	159850000	79029000
UBX2	1	5	5	16.4	66.76	0.094137	49294000	25862000	23432000
RRF1	1	7	7	43.5	26.406	0.094382	275810000	219240000	56574000
GCV1	1	9	9	26.5	44.468	0.094422	232570000	184870000	47696000
UTH1	1	5	5	26.8	36.955	0.094734	203270000	164300000	38969000
MIC60	1	14	14	45.6	61.081	0.095195	378410000	255250000	123160000
GPI13	1	4	4	6.5	115.63	0.095622	58246000	47709000	10537000
LYS1	1	8	8	37.5	41.464	0.096019	232860000	187110000	45746000
SWH1	1	6	6	7	135.1	0.096114	48430000	41726000	6703300
CPR2	1	2	2	12.7	22.769	0.096477	19442000	14926000	4516100
ERP2	1	3	2	24.2	24.063	0.096495	104870000	86241000	18628000
PHM7	1	2	2	3.5	112.54	0.096888	19279000	15943000	3335400
GRX2	1	4	4	25.9	15.861	0.097254	96550000	79390000	17160000
VPS34	1	6	6	12.7	100.92	0.097662	45914000	40023000	5891600
YCP4	1	9	9	62.3	26.35	0.098354	727130000	584070000	143070000
ITR1	1	6	6	12.8	63.569	0.098727	119040000	92387000	26650000
TOM71	1	13	13	30.5	71.855	0.099534	278300000	200680000	77613000
YCK2	1	5	4	16.7	62.078	0.099729	139760000	116810000	22952000
UIP3	1	3	3	14	27.116	0.099812	26455000	22946000	3508600
EMC4	1	4	4	28.9	21.46	0.099912	57903000	40808000	17094000
ADH3	1	12	11	41.6	40.369	0.099953	1012300000	813580000	198760000
FPK1	1	2	2	3	100.55	0.10005	11663000	9756800	1905800
MGR1	1	4	4	12.2	47.156	0.10026	70523000	57029000	13495000
COX15	1	2	2	3.7	54.658	0.10076	11888000	9398500	2490000
SCW4	1	8	8	43.8	40.173	0.10096	113410000	93270000	20141000
HEH2	1	8	8	14.9	76.376	0.10104	190220000	131180000	59035000
	1	3	3	22.1	16.037	0.10172	27626000	22426000	5200700
OSH2	1	7	7	6.2	145.79	0.10255	77239000	54434000	22805000
AIM18	1	6	6	24	36.501	0.10445	71059000	57026000	14033000
VAN1	1	5	5	18.7	61.091	0.10475	94900000	71698000	23202000
MRPL36	1	5	5	42.9	20.09	0.10489	88888000	69990000	18898000
RAS2	1	10	10	54	34.705	0.10517	517840000	409950000	107890000
CHS3	1	5	5	8.2	131.6	0.10544	42114000	35038000	7075800
RIB2	1	2	2	5.9	67.035	0.10558	14871000	13646000	1224400
MRP7	1	10	10	33.2	43.226	0.10568	234550000	181200000	53355000
BNI4	1	3	3	4.8	100.59	0.10624	28685000	23311000	5374100
FMP10	1	3	3	22.1	27.698	0.10632	40026000	30976000	9049300
IFM1	1	6	6	11.8	75.656	0.10638	40653000	27003000	13650000
MTC5	1	6	6	5.6	130.94	0.10643	48374000	38491000	9882800
TIM50	1	15	15	39.9	55.098	0.10672	798920000	618250000	180670000
POM152	1	12	12	13.3	151.65	0.10685	122900000	91791000	31110000
YEH2	1	2	2	4.3	62.446	0.10717	9975100	8097900	1877200
EMC5	1	4	4	43.3	15.907	0.10773	67356000	61351000	6006000
CPR4	1	4	4	21.1	35.779	0.10816	25292000	21787000	3504800
LAS17	1	3	3	12.3	67.571	0.10819	47738000	35770000	11968000
HYR1	2	9	9	50.9	18.641	0.10831	261180000	205070000	56111000
SPS19	1	5	5	27.4	31.109	0.10882	90177000	70366000	19811000
YML6	1	4	4	21	31.969	0.10918	153820000	118540000	35279000
FRE6	1	3	3	7.7	81.988	0.10957	31832000	28657000	3175200
CYC7	1	7	5	64.6	12.532	0.10968	266980000	191020000	75953000
FAT1	1	4	4	12.1	77.14	0.10984	17409000	14542000	2866200
RME1	1	2	2	8	33.904	0.11046	24978000	20030000	4948200
RHO2	1	3	3	22.9	21.479	0.11063	18013000	14096000	3917000
DPM1	1	8	8	47.2	30.362	0.11107	438520000	352540000	85982000
PHO86	1	4	4	16.1	34.881	0.11131	33941000	30019000	3921900
CWH43	1	2	2	3.9	107.88	0.11229	26832000	21586000	5246100
YET3	1	8	8	34	22.902	0.11233	278030000	217450000	60579000
MRPL31	1	3	3	29.8	15.52	0.1126	53881000	43962000	9918900
YPK9	1	11	11	11.6	166.75	0.11291	120730000	95388000	25343000
MON2	1	5	5	4.1	186.83	0.11319	51586000	22893000	28693000
ENA5;ENA2;ENA1	3	13	13	18.1	120.29	0.11319	205410000	163110000	42299000
TOR1	1	12	12	7.3	281.14	0.11337	98361000	81099000	17262000
SHY1	1	5	5	22.6	45.055	0.11377	86065000	65902000	20162000
PTC5	1	9	9	26.6	63.668	0.11432	127440000	92858000	34581000
YPL199C	1	3	3	11.2	26.757	0.1147	28921000	22379000	6542800
GNP1	1	5	5	9	73.597	0.11515	75778000	61893000	13885000
FAB1	1	3	3	2.2	257.42	0.11528	27353000	22401000	4951400
ILV2	1	13	13	26.6	74.936	0.11592	1962200000	1525400000	436810000
IML2	1	7	7	10.3	82.535	0.11655	58172000	45062000	13109000
MDM38	1	13	13	30	65.004	0.11779	278570000	223800000	54767000
ALO1	1	8	8	22.2	59.493	0.11835	212030000	162240000	49783000
AST1	2	4	3	14.2	48.348	0.11853	33120000	27245000	5875700
PAM18	1	4	4	20.2	17.91	0.11893	159820000	122080000	37742000
VAM7	1	2	2	9.2	36.711	0.11981	49601000	39616000	9984600
YTA12	1	14	12	25.6	93.275	0.12055	255310000	192940000	62372000
MRPL10	1	6	6	20.8	36.347	0.12066	185890000	140500000	45395000
AFG3	1	9	7	15.2	84.543	0.12088	119170000	92850000	26322000
LAT1	1	15	15	34	51.817	0.12195	1243300000	950490000	292840000
ILV6	1	2	2	9.4	33.986	0.12225	107180000	78853000	28328000
	1	3	3	27.4	27.092	0.12258	41491000	36205000	5285200
ATP25	1	3	3	6.7	70.413	0.12283	26578000	19278000	7300500
CYC1	1	7	5	49.5	12.182	0.12325	604590000	456920000	147670000
MRPL20	1	3	3	14.9	22.392	0.12346	64887000	48798000	16088000
PAM16	1	8	8	77.2	16.216	0.12382	366860000	216850000	150010000
PEX15	1	1	1	3.9	43.676	0.12414	3958300	3300700	657540
KES1	1	18	18	45.9	49.491	0.12424	545710000	408570000	137140000
CDC3	1	17	17	39.2	60.054	0.1246	799550000	602050000	197500000
UBX3	1	4	4	16.3	52.943	0.12465	36862000	33910000	2951400
RSM23	1	6	6	18.7	50.866	0.1248	111490000	87265000	24226000
KTR6	1	5	5	23.8	52.127	0.12489	98219000	75649000	22570000
GSC2	1	6	3	6.2	216.99	0.12533	23022000	18365000	4656700
SSC1	2	34	34	64.1	70.627	0.12583	16674000000	12777000000	3896800000
TIM21	1	4	4	19.7	27.205	0.12607	37091000	22404000	14687000
VAC17	1	3	3	10.9	47.843	0.12658	39055000	34273000	4781800
LIP5	1	6	6	26.3	46.247	0.12664	92554000	69021000	23533000
ERV14	1	1	1	10.9	15.93	0.12696	9522300	7447700	2074500
RSM25	1	4	4	23.1	30.513	0.12739	94091000	72014000	22076000
MDJ1	1	9	9	28.8	55.56	0.12744	333250000	230750000	102500000
NUP170	1	5	5	5.3	169.47	0.12763	35464000	29603000	5861100
BNA4	1	3	3	10.9	52.429	0.12803	37602000	25752000	11850000
YFR006W	1	9	9	22.2	61.753	0.1282	251520000	71546000	179970000
AIM9	1	19	19	41.8	72.413	0.1283	444970000	248640000	196330000
IMG2	1	2	2	9.6	16.38	0.12902	18229000	14033000	4195700
RSN1	1	14	14	15.4	107.67	0.12914	221800000	181340000	40457000
PSD1	1	4	4	11	56.594	0.12921	59139000	40767000	18372000
PGA2	1	4	4	34.1	15.053	0.12988	179660000	131140000	48516000
IML1	1	5	5	5.6	181.95	0.1299	21404000	18900000	2504000
FKS1	1	10	7	7.5	214.85	0.13057	133040000	100720000	32318000
CYC3	1	3	3	21.6	30.081	0.13075	36964000	29419000	7544600
CYB5	1	4	4	63.3	13.297	0.13106	285950000	238640000	47302000
SFH5	1	7	7	37.1	34.388	0.13155	109220000	84018000	25207000
CTR1	1	4	4	13.5	44.441	0.13155	141400000	109810000	31587000
STR3	1	9	9	36.3	51.828	0.13183	163990000	133200000	30795000
GAS1	1	8	8	20.9	59.582	0.13212	1530600000	1189500000	341090000
TAT1	1	2	2	3.9	68.757	0.13268	20793000	15639000	5153900
MNN5	1	10	10	34.5	67.204	0.13277	291300000	217270000	74032000
TIM54	1	5	5	14.4	54.182	0.13286	36436000	28320000	8116500
MRPL17	1	6	6	26.3	32.212	0.13299	39085000	29481000	9603600
PMT3	1	3	3	6.1	86.322	0.13313	20962000	18694000	2268200
MRH1	1	3	3	12.8	36.19	0.1332	1458500000	1092000000	366510000
NUC1	1	7	7	42.9	37.209	0.13327	174660000	131260000	43391000
NAM9	1	14	14	31.5	56.355	0.13399	482410000	351130000	131280000
MRPL24	1	7	7	31.4	30.049	0.134	71391000	53976000	17415000
PDX1	1	9	9	41.5	45.361	0.13422	53417000	40421000	12996000
TIM23	1	4	4	27.5	23.243	0.13446	83000000	69947000	13053000
AIM36	1	4	4	21.6	29.076	0.1351	62243000	47651000	14592000
MUP1	1	3	3	12	63.221	0.13544	23506000	19743000	3762500
TOM40	1	11	11	56.8	42.038	0.13562	505350000	372260000	133090000
AIM17	1	8	8	27.1	53.134	0.1357	262390000	216070000	46324000
ABF2	1	13	13	67.8	21.561	0.13583	2439100000	1810000000	629100000
CDC10	1	5	5	23.6	37.024	0.13615	37321000	27363000	9958200
NFU1	1	4	4	20.3	29.174	0.13621	29203000	21817000	7386200
DNF1	1	2	2	2.7	177.8	0.13678	18894000	14835000	4058800
RAS1	1	2	2	13.3	34.346	0.1368	51187000	36913000	14274000
NUP116	1	6	6	9.8	116.23	0.13717	41868000	32741000	9127300
MNN11	1	3	3	10.7	47.858	0.13731	39856000	26445000	13411000
KGD2	1	6	6	21	50.43	0.13773	293300000	218920000	74383000
MRPL51	1	2	2	24.3	16.123	0.13773	51870000	36142000	15728000
SSQ1	1	10	10	25.4	72.364	0.13826	119500000	78817000	40687000
LYS4	1	14	14	35.2	75.15	0.13833	184870000	133020000	51852000
MRPL40	1	11	11	53.9	33.751	0.13842	282090000	215280000	66805000
MRPL4	1	2	2	8.2	36.964	0.1385	37401000	28011000	9389600
SAM3	1	4	4	7.2	64.353	0.13867	51776000	36352000	15425000
TIP20	1	3	3	7.4	81.165	0.13871	14322000	11742000	2579900
PEP8	1	3	3	18.7	42.546	0.13881	33870000	26600000	7270400
PEP3	1	8	8	12.1	107.4	0.13945	62898000	45801000	17097000
COQ1	1	3	3	5.9	52.559	0.13954	38292000	29003000	9289100
HXT1	1	2	2	4.9	63.261	0.14043	51899000	35226000	16673000
MHR1	1	4	4	24.8	26.894	0.14056	67130000	49163000	17967000
FAD1	1	2	2	12.7	35.546	0.14107	27097000	20352000	6745100
HSP10	1	5	5	74.5	11.372	0.14187	332230000	244880000	87345000
OPI1	1	4	4	18.1	46.064	0.14217	34293000	23309000	10984000
NTE1	1	10	10	8.5	187.13	0.14223	140930000	117870000	23061000
MRPL27	1	5	5	43.8	16.492	0.14234	108070000	80026000	28040000
VPS13	1	13	13	6.7	357.85	0.14294	84070000	63832000	20237000
PDB1	1	3	3	16.7	40.053	0.14448	863690000	647690000	215990000
YOR1	1	2	2	1.8	166.73	0.14461	5430300	4484400	945950
LEU9	1	11	8	32.8	67.199	0.14489	123370000	80711000	42656000
HSP60	1	25	25	70.3	60.751	0.14521	4230700000	3074000000	1156700000
RSM10	1	2	2	13.3	23.424	0.14551	50555000	36520000	14036000
VPS17	1	4	4	14	63.203	0.14561	37072000	29096000	7976400
GLE2	1	2	2	11.5	40.522	0.14608	50722000	34574000	16149000
PMA1;PMA2	2	23	23	33.8	99.618	0.14613	7830000000	5702800000	2127200000
IDH2	1	11	11	53.7	39.739	0.14618	1059100000	783300000	275810000
CYM1	1	13	13	19.4	112.18	0.14618	123460000	88882000	34581000
RSM27	1	4	4	50	12.392	0.14638	170530000	133170000	37357000
AIM41	1	2	2	15.1	21.229	0.14669	47144000	32981000	14163000
MIC27	1	2	2	8.5	26.959	0.14674	17899000	14284000	3615300
SCS2	1	14	14	63.1	26.925	0.14675	689530000	512270000	177260000
IDH1	1	10	10	53.6	39.324	0.14728	784370000	604230000	180140000
MIS1	1	17	17	22.3	106.22	0.14732	405050000	274350000	130700000
LPD1	1	22	22	57.5	54.009	0.14773	1205900000	878900000	326960000
MRPL11	1	4	4	24.1	28.515	0.14777	77532000	52686000	24846000
CDC12	1	11	11	40	46.667	0.1478	317540000	229190000	88353000
RSM24	1	3	3	13.5	37.393	0.14828	89376000	66414000	22962000
MRPL9	1	4	4	16.4	29.79	0.14831	26674000	19614000	7059500
MAS2	1	8	8	22.6	53.337	0.14895	194660000	143180000	51484000
TIM17	1	2	2	27.8	16.584	0.14975	61968000	46151000	15817000
YLR225C	1	2	2	8.6	46.422	0.14991	13746000	10603000	3143300
MRPL6	1	4	4	22	23.889	0.15001	54455000	38406000	16049000
NPR2	1	5	5	16.1	69.858	0.15033	31591000	28389000	3202000
HOC1	1	2	2	8.1	46.296	0.15062	40645000	29101000	11544000
MRPL7	1	2	2	11	33.099	0.15082	49095000	40528000	8566600
DLD2	1	11	11	28.3	59.268	0.15192	219240000	155410000	63830000
SHM1	1	15	15	37.3	53.686	0.15223	787100000	550840000	236270000
MRPL1	1	4	4	19.3	30.996	0.15235	98969000	59702000	39267000
PST2	1	7	7	62.6	20.965	0.15272	467970000	338030000	129940000
YBL029C-A	1	2	2	22.3	11.161	0.15306	9923500	7856800	2066700
SSO1	1	5	4	21.7	33.106	0.15316	227950000	168640000	59308000
MEF1	1	12	12	21.8	84.573	0.15376	346520000	245770000	100760000
PUT2	1	9	9	23.3	64.434	0.15378	124110000	90716000	33390000
SCO1	1	3	3	11.2	33.166	0.15391	59296000	44129000	15167000
MGM101	1	8	8	43.9	30.09	0.15454	171390000	119770000	51626000
CYB2	1	7	7	20.8	65.539	0.15463	90753000	59438000	31315000
ETR1	1	12	12	49.7	42.066	0.15474	322170000	224100000	98073000
ATG15	1	5	5	13.5	58.434	0.15543	66523000	59092000	7430300
MNN2	1	15	15	39.5	67.773	0.15561	473230000	339350000	133880000
HXT4	1	3	3	10.4	63.909	0.15572	37028000	29424000	7603700
MRP1	1	5	5	16.8	36.728	0.15611	60725000	43024000	17701000
MID1	1	2	2	3.6	61.574	0.15618	18869000	15408000	3461100
MRPL3	1	8	8	28.2	43.999	0.15637	110230000	81948000	28279000
YCK1	1	3	2	10.4	61.714	0.15671	37554000	27933000	9620700
PAM17	1	1	1	12.7	21.968	0.15735	59257000	40669000	18587000
IST1	1	2	2	4	34.495	0.1574	68567000	51479000	17089000
LSC1	1	14	14	63.2	35.032	0.15744	860150000	624930000	235220000
MPM1	1	10	10	70.2	28.47	0.15812	217940000	153630000	64304000
SYP1	1	6	6	9.3	96.136	0.15831	75636000	51273000	24363000
POM34	1	5	5	29.1	34.232	0.15868	62036000	48190000	13846000
TIM44	1	11	11	34.1	48.854	0.15908	248350000	171050000	77301000
YDR381C-A	1	2	2	23.7	12.714	0.15947	21066000	13923000	7143400
ACO1	1	34	32	56.2	85.367	0.15953	7454800000	5306900000	2147900000
MRPS35	1	11	11	46.4	39.575	0.15962	385500000	269320000	116170000
ALT1	1	7	7	24.7	66.421	0.15988	95276000	66399000	28877000
OM14	1	4	4	56.7	14.609	0.15998	70941000	54352000	16589000
HMG2	1	6	3	8	115.69	0.16	20135000	17761000	2374900
PHB2	1	4	4	15.2	34.406	0.16077	352940000	236430000	116510000
TUF1	1	9	9	28.8	47.972	0.16149	895310000	653840000	241480000
HEM14	1	2	2	4.8	59.702	0.16194	14314000	10929000	3385400
CYT2	1	4	4	21.9	26.076	0.16233	35779000	25207000	10572000
SLP1	1	6	6	11.8	67.451	0.16259	23444000	21661000	1783100
MAS1	1	3	3	8.7	51.083	0.16285	62491000	45418000	17072000
KGD1	1	19	19	26.7	114.41	0.16296	556110000	390970000	165140000
PEX25	1	5	5	24.6	44.91	0.16356	117300000	47879000	69421000
NDI1	1	17	17	47.4	57.249	0.16391	527080000	373600000	153490000
VAR1	1	3	3	12.1	47.123	0.16396	64508000	40918000	23590000
PDA1	1	14	14	55.5	46.343	0.16435	774950000	494360000	280580000
CDC50	1	5	5	19.7	44.982	0.1646	59972000	36946000	23026000
CIR2	1	16	16	40.1	69.633	0.16599	192200000	141640000	50561000
PPA2	1	3	3	14.8	35.572	0.16605	18408000	13770000	4637600
SMY1	1	4	4	11.7	73.798	0.16648	23005000	15357000	7647100
CPR3	1	6	5	50.5	19.919	0.16665	265680000	187010000	78665000
AIM45	1	9	9	45.1	36.802	0.16695	126440000	85246000	41194000
ACO2	1	18	16	35.4	86.582	0.16803	466150000	326500000	139650000
MRPS9	1	7	7	35.6	31.925	0.16843	85756000	65517000	20240000
PSR1	1	2	2	7.3	47.93	0.16908	20450000	15560000	4889900
SDH1	2	15	15	37	70.229	0.16929	538210000	355230000	182980000
UBC7	1	2	2	21.2	18.52	0.16981	14241000	10461000	3779800
IDP1	2	20	20	57	48.19	0.17007	721850000	507180000	214670000
NIC96	1	9	9	15.9	96.173	0.17018	75121000	45072000	30049000
SSO2	1	6	5	35.9	33.733	0.17029	650010000	461840000	188170000
APQ12	1	2	2	17.4	16.507	0.17039	13796000	9699700	4096700
YIL108W	1	6	6	12.4	77.413	0.17076	73320000	49089000	24231000
YOP1	1	5	5	31.1	20.269	0.17081	494930000	361880000	133050000
GRX4	1	5	5	29.5	27.493	0.17108	31944000	24096000	7847500
PRS4	1	2	2	10.1	35.72	0.17121	54728000	47419000	7308300
ILV3	1	21	21	52.3	62.86	0.1713	2246700000	1580300000	666420000
ALG2	1	5	5	17.7	58.046	0.17165	58198000	37487000	20711000
GLE1	1	3	3	7.8	62.073	0.17172	30028000	19867000	10161000
SOD2	1	8	8	58.4	25.774	0.17216	578710000	347420000	231280000
MRPS8	1	4	4	36.1	17.47	0.17244	46763000	31924000	14838000
MRPL35	1	6	6	24.5	42.825	0.17262	48520000	36435000	12085000
MRPL15	1	3	3	14.6	28.167	0.17264	31566000	20883000	10683000
MDH1	1	11	11	47	35.65	0.17298	710320000	494060000	216260000
POS5	1	2	2	6.3	46.246	0.17302	25424000	19467000	5957000
PIM1	1	20	20	26.7	127.11	0.1736	231690000	145130000	86567000
GGC1	1	3	3	12.7	33.215	0.17373	34995000	25772000	9223900
PEX30	1	3	3	11.3	59.461	0.17404	33743000	26268000	7475500
CCP1	1	9	9	25.2	40.352	0.17416	137870000	96558000	41316000
MEX67	1	3	3	7.8	67.351	0.17426	47228000	32336000	14891000
ARH1	1	4	4	14	56.237	0.17436	39365000	24162000	15202000
VPS16	1	5	5	10.2	92.74	0.1746	29744000	25378000	4366800
YMR31	1	2	2	17.1	13.689	0.17462	31148000	22470000	8677800
MRP4	1	4	4	14.5	44.151	0.17509	58154000	39872000	18282000
OM45	1	15	15	46.1	44.58	0.17531	622570000	434890000	187680000
KTR7	1	3	3	8.3	61.437	0.17563	70781000	36995000	33786000
LEU4	1	11	8	25.8	68.408	0.17591	963750000	665120000	298630000
MRPS28	1	5	5	21.3	33.057	0.17598	55843000	39971000	15873000
ARG5,6	1	8	8	17.3	94.868	0.176	69998000	50183000	19814000
MRPS16	1	2	2	30.6	13.639	0.17619	20590000	12271000	8319000
GET3	1	11	11	48.6	39.353	0.17625	350770000	189950000	160820000
MMF1	1	6	6	58.6	15.908	0.17631	562570000	405220000	157350000
ALD4	1	21	19	50.9	56.723	0.17632	726670000	499100000	227560000
MRPL8	1	4	4	20.2	26.945	0.17771	92136000	38084000	54052000
TOS1	1	4	4	21.5	47.994	0.17822	50188000	41336000	8851200
ACH1	1	4	4	8.7	58.711	0.17836	83887000	62326000	21561000
MRF1	1	3	3	17.2	46.77	0.17845	22542000	17495000	5047300
RSP5	1	6	6	11.7	91.815	0.17907	269030000	214050000	54975000
NPL4	1	3	3	9.3	65.781	0.17992	27197000	20436000	6760300
CBP6	1	2	2	19.1	18.678	0.18075	33092000	22913000	10179000
AST2	1	3	2	8.8	48.37	0.18137	14976000	11289000	3687200
RHO4	1	2	2	15.8	32.185	0.18212	42216000	34789000	7427000
MRP20	1	2	2	9.9	30.566	0.18302	22315000	15824000	6491500
MCR1	1	17	17	65.9	34.137	0.18346	1445200000	982360000	462810000
LEM3	1	6	6	24.4	47.437	0.18347	344840000	188310000	156530000
ARG7	1	9	9	29.7	47.848	0.18425	192800000	121270000	71527000
MSC6	1	11	11	23.8	79.946	0.18434	138620000	98804000	39813000
RSM26	1	3	3	19.2	30.223	0.1846	14504000	8709400	5794700
NNF2	1	3	3	4.4	106.46	0.18468	31009000	23227000	7781900
NAT2	1	2	2	11.5	32.804	0.18495	32494000	17556000	14937000
YPL107W	1	3	3	22.6	28.569	0.18498	14651000	10551000	4100000
CIR1	1	6	6	30.3	28.758	0.1856	87994000	62399000	25596000
RSM7	1	3	3	15.8	27.816	0.18584	34388000	20626000	13762000
RSM19	1	2	2	25.3	10.275	0.18597	22548000	14771000	7777400
MRPL23	1	2	2	17.2	18.463	0.18759	32086000	22089000	9997400
MRP13	1	4	4	11.2	38.988	0.18762	62191000	45007000	17183000
CRN1	1	14	14	37	72.552	0.18766	370540000	248980000	121560000
YME2	1	3	3	5.9	96.687	0.18876	32750000	24270000	8480400
	1	3	3	3.8	49.663	0.18905	86135000	29413000	56722000
PHB1	1	11	11	68.6	31.427	0.18923	225160000	139610000	85552000
HEM1	1	7	7	16.1	59.362	0.18938	87742000	56788000	30953000
MGM1	1	7	7	12	99.177	0.18952	38057000	26811000	11246000
JJJ1	1	2	2	5.4	68.782	0.19013	5538700	4244700	1293900
ATP11	1	4	4	14.5	36.851	0.19023	59179000	38475000	20704000
LYS12	1	4	4	17.3	40.068	0.19093	158870000	105130000	53745000
NUP100	1	5	5	8.1	99.987	0.19095	47054000	32787000	14268000
BAT1	1	12	12	57.8	43.596	0.19219	1004100000	688720000	315420000
LSC2	1	13	13	37.7	46.9	0.19243	358660000	242420000	116240000
NFS1	1	2	2	8.5	54.466	0.1929	16809000	11603000	5206200
	1	2	2	5	61.191	0.19336	14555000	10010000	4545200
CYT1	1	3	3	18.4	34.054	0.19358	46547000	31425000	15122000
RIM1	1	4	4	51.9	15.386	0.19361	150120000	108890000	41230000
RSC58	1	2	2	5.8	57.794	0.195	20630000	14098000	6531400
RHO3	1	4	4	26.4	25.312	0.19541	83942000	54812000	29130000
POR1	1	14	14	76.7	30.428	0.19554	2384900000	1641900000	742980000
ATP3	1	11	11	43.1	34.35	0.19584	564870000	371310000	193560000
UBX7	1	3	3	11.2	50.03	0.19665	42346000	27439000	14908000
NDE1	1	16	16	38	62.773	0.19684	630570000	425980000	204590000
	1	2	2	5.2	81.768	0.19766	11758000	7780600	3977100
USE1	1	4	4	26.9	28.106	0.19799	32188000	27925000	4262800
GET2	1	4	4	26	31.493	0.19864	30655000	22126000	8528800
SHE3	1	3	3	9.6	47.416	0.19899	51724000	38931000	12793000
RAV2	1	2	2	9.7	40.017	0.1996	33310000	22498000	10812000
HSP78	1	14	14	23.3	91.335	0.19963	675910000	177950000	497960000
YPT52	1	4	4	32.9	26.132	0.20014	69507000	47792000	21714000
MDL2	1	3	3	6	85.136	0.20041	23248000	15616000	7632300
FMP41	1	4	4	24.3	28.792	0.20049	56516000	39856000	16659000
SNX3	1	2	2	22.2	18.769	0.20095	22804000	15585000	7218600
ROT2	1	5	5	8.6	110.26	0.20108	153900000	70054000	83844000
AIM10	1	3	3	8.9	65.88	0.20142	13846000	9195800	4650700
JSN1	1	3	3	4.2	120.37	0.2017	31301000	19816000	11485000
RFS1	1	3	3	25.7	22.921	0.20223	27613000	18362000	9250800
OSH7	1	9	9	25.9	49.804	0.20226	175000000	117890000	57111000
PAR32	1	4	4	18	31.886	0.20227	93893000	67421000	26472000
SEC22	1	3	3	27.6	25.057	0.20256	72644000	52437000	20207000
PDR12	1	3	3	3.2	171.06	0.20371	19641000	13382000	6258200
TOM22	1	3	3	43.4	16.79	0.204	62443000	34448000	27994000
YPT1	1	7	7	45.6	23.214	0.20422	307870000	208020000	99857000
SEA4	1	7	7	10.5	117.63	0.20484	125440000	58648000	66797000
MNN1	1	10	10	19	88.528	0.20583	136350000	96737000	39611000
TES1	1	2	2	8.9	40.259	0.20831	6087400	4805200	1282200
MSW1	1	4	4	17.2	43.015	0.20923	32271000	22836000	9434900
SAC7	1	3	3	8.6	73.628	0.20988	20923000	14825000	6097600
MYO3	1	4	2	5	142.45	0.21213	31745000	21057000	10687000
CIT1	1	8	7	26.3	53.359	0.21219	466250000	305470000	160770000
COX20	1	2	2	13.2	23.758	0.21446	19097000	13698000	5399000
TCD2	1	3	3	10.1	50.265	0.21548	19344000	12034000	7309800
RDL2	1	2	2	32.2	16.697	0.21558	21392000	14438000	6954300
MRPL19	1	3	3	26.6	16.67	0.21591	19349000	14523000	4826300
ILV5	1	18	18	59.7	44.368	0.21597	6508900000	4226600000	2282300000
MYO2	1	5	5	4.8	180.68	0.21722	40295000	27845000	12449000
ALG11	1	4	4	10	63.142	0.21746	18309000	13539000	4770600
SEC18	1	11	11	23.6	84.055	0.21794	128550000	71186000	57364000
KIN1	1	6	6	11.4	120.07	0.21839	31775000	22853000	8922200
CKB1	1	3	3	12.2	32.264	0.21868	62892000	32608000	30284000
ILV1	1	16	16	45.8	63.83	0.21932	346760000	170060000	176700000
WHI2	1	3	3	9.1	55.345	0.21948	34688000	21157000	13531000
COR1	1	15	15	48.4	50.227	0.22007	892060000	582100000	309960000
CBF1	1	2	2	7.4	39.387	0.22016	29973000	22172000	7800500
RRP9	1	2	2	5.1	65.053	0.22068	78244000	69405000	8839100
ERV1	1	3	3	24.9	21.639	0.22105	21866000	14665000	7200900
ALD5	1	12	10	26.9	56.692	0.22118	213980000	136970000	77016000
GDI1	1	6	6	19.3	51.206	0.2219	130940000	81654000	49291000
MRPL13	1	2	2	14	30.271	0.22241	23152000	15863000	7288700
PDR5	1	11	11	15.9	170.44	0.22299	121230000	81619000	39610000
YHM2	1	4	4	22.9	34.184	0.22312	68366000	45000000	23366000
TRX3	1	3	3	29.9	14.432	0.22353	26703000	14588000	12115000
FMC1	1	4	4	44.5	18.364	0.22409	31683000	22389000	9294000
RMD9	1	5	5	13.6	74.595	0.22454	33217000	23528000	9689300
RIP1	1	5	5	39.5	23.365	0.2254	136140000	87326000	48809000
CIT2	1	5	4	18.7	51.413	0.22597	73768000	49130000	24638000
HXT3	1	3	3	12	62.557	0.22696	16096000	12766000	3330100
MSS51	1	2	2	5.5	50.88	0.22725	20268000	13796000	6472400
KTR1	1	7	7	23.4	46.022	0.22742	82260000	52665000	29595000
ATP5	1	12	12	72.6	22.814	0.22947	552080000	352750000	199330000
ATP2	1	13	13	37.4	54.793	0.22979	1315800000	835000000	480830000
YDL121C	1	2	2	34.2	16.947	0.2315	23065000	15167000	7898600
SDH5	1	2	2	16	19.042	0.23165	12943000	8339100	4603900
COX5B	2	3	3	29.1	17.197	0.23267	40500000	24798000	15703000
MRPS18	1	5	5	31.3	24.563	0.23311	473700000	377850000	95854000
PGC1	1	2	2	8.1	37.069	0.23311	21749000	14505000	7243900
AIM24	1	4	4	11.4	44.427	0.23325	28157000	20741000	7415700
JAC1	1	2	2	23.9	21.778	0.23408	13504000	9985900	3517700
BCS1	1	3	3	10.7	51.107	0.23418	18903000	12274000	6629200
GRX5	1	3	3	32	16.931	0.2342	44041000	19438000	24603000
YHR045W	1	2	2	3.9	62.691	0.2344	15666000	8694900	6971200
MZM1	1	2	2	22.8	13.927	0.23448	68166000	41350000	26815000
YPK2	1	4	4	9	76.663	0.23471	12102000	10451000	1651300
SDH2	1	4	4	19.9	30.231	0.23613	75416000	48813000	26602000
SLA1	1	4	4	4.3	135.85	0.23697	48755000	34927000	13829000
KTR3	1	5	5	14.4	47.482	0.2397	66082000	47919000	18163000
MNN9	1	3	3	9.9	45.954	0.23975	21753000	13826000	7927000
OMS1	1	2	2	7.2	55.588	0.24086	34268000	22352000	11916000
YPK1	1	5	5	12.2	76.479	0.24107	46196000	29110000	17086000
ATP12	1	4	4	14.5	36.554	0.24109	17561000	13050000	4510800
XDJ1	1	2	2	4.8	51.346	0.24157	20115000	10741000	9374400
SCM4	1	2	2	9.6	20.118	0.24165	18099000	12416000	5682900
YGR012W	1	5	5	25.4	42.8	0.24165	25217000	17895000	7322800
RML2	1	3	3	9.4	43.785	0.24189	49569000	20810000	28758000
DSL1	1	3	3	3.2	88.071	0.24209	11790000	7547100	4242500
QCR2	1	16	16	65.5	40.478	0.24311	930410000	584590000	345820000
SHS1	1	4	4	10	62.629	0.2435	67149000	39922000	27227000
NSP1	1	2	2	4.1	86.515	0.24356	19268000	13242000	6025300
FUM1	1	11	11	36.3	53.151	0.24462	569840000	376100000	193740000
FYV4	1	2	2	19.2	15.291	0.24763	9199800	6986500	2213300
PET9	2	9	9	27.4	34.426	0.25436	1194400000	727070000	467290000
NUP157	1	2	2	2.4	156.65	0.25493	10063000	7559700	2503600
RCF2	1	1	1	7.6	25.344	0.25535	74876000	47006000	27870000
MIC19	1	2	2	12.4	18.855	0.25797	16092000	10112000	5979400
RTN1	1	7	7	28.1	32.916	0.25855	497960000	291780000	206180000
	1	1	1	8	20.151	0.2589	55374000	35348000	20026000
ATP1	1	14	14	48.6	58.607	0.25902	1650800000	1057800000	592920000
	1	3	3	6.4	94.253	0.26079	20879000	16491000	4387800
MSD1	1	3	3	8.5	75.46	0.26273	35389000	22437000	12953000
ANP1	1	4	4	12.8	58.181	0.2641	49280000	28333000	20947000
RGI1	1	2	2	19.3	18.989	0.26468	104220000	55411000	48807000
YIL077C	1	3	3	14.1	36.946	0.26499	21086000	14973000	6113500
HTA2;HTA1	2	2	2	32.6	13.989	0.26771	227080000	133190000	93894000
MRPL33	1	2	2	38.4	9.5311	0.26795	18938000	12204000	6734900
YKT6	1	7	7	41	22.707	0.27157	165430000	96908000	68526000
MRPS17	1	2	2	11.8	27.635	0.27249	9598700	6325200	3273500
FUS3	1	4	4	11	40.772	0.27255	20089000	11563000	8525400
MSC3	1	1	1	2.9	80.529	0.27347	17476000	11594000	5882400
SNX4	1	2	2	7.8	49.002	0.27448	19164000	12204000	6960000
FMP25	1	6	6	15.8	66.689	0.27628	49388000	26918000	22470000
GRX6	1	4	4	27.3	25.783	0.27861	48161000	27616000	20545000
EMP47	1	8	8	30.8	50.33	0.27863	136720000	84733000	51988000
SLM1	1	3	3	5.8	77.994	0.2799	9576800	7029000	2547800
KRE2	1	7	7	28.1	51.386	0.28036	259830000	155870000	103970000
ATP4	1	10	10	44.7	26.925	0.28085	541270000	321520000	219750000
ACF4	1	3	3	12.6	35.52	0.28276	19215000	13432000	5782800
PMR1	1	5	5	9.3	104.57	0.28351	34922000	21729000	13193000
ATP7	1	8	8	69	19.809	0.2841	188240000	117410000	70829000
KEX1	1	2	2	3.4	82.244	0.28487	10589000	7104300	3485200
UBP10	1	2	2	3	88.53	0.28768	9110300	5465000	3645300
GLR1	1	10	10	38.7	53.44	0.29145	656020000	90440000	565580000
WHI3	1	2	2	4.5	71.252	0.29278	28277000	14953000	13324000
TGL3	1	3	3	8.1	73.612	0.29287	12330000	9297500	3032800
UTP11	1	2	2	16	29.735	0.29297	23116000	15503000	7613200
MSP1	1	2	2	8.3	40.343	0.29543	28438000	16787000	11651000
ATP18	1	2	2	35.6	6.6877	0.29649	89511000	50606000	38905000
MIR1	1	8	8	39.9	32.812	0.29812	287360000	170040000	117320000
MIA40	1	2	2	7.4	44.536	0.30087	8797700	6173200	2624500
CKB2	1	2	2	16.7	29.842	0.3028	16057000	8875900	7180600
ATP17	1	3	3	29.7	11.312	0.30297	120490000	64577000	55909000
SSH4	1	2	2	5.9	65.06	0.30432	24717000	18623000	6094000
ARG8	1	3	3	13.7	46.681	0.30479	12263000	7954800	4308400
MRPS5	1	3	3	13.4	34.883	0.30511	33315000	17959000	15357000
TY1B-ER1;TY1B-PR1;TY1B-PL;TY1B-LR2;TY1B-DR4;TY1B-NL2;TY1B-DR6	9	17	0	18.5	198.56	0.30534	354180000	168170000	186010000
NUP145	1	4	4	5.5	145.66	0.30543	36529000	25849000	10680000
MSF1	1	5	5	15.8	54.828	0.30629	731750000	253800000	477960000
AIM32	1	2	2	9	35.977	0.30735	9542300	6080300	3462000
HEM15	1	6	6	24.9	44.596	0.31411	185300000	109680000	75617000
ATP15	1	2	2	69.4	6.7425	0.31414	25770000	14298000	11472000
COQ5	1	3	3	16.6	34.684	0.31658	23291000	16204000	7086900
MTF2	1	4	4	11.8	51.192	0.32149	25464000	17362000	8102300
HHF1	1	4	4	50.5	11.368	0.32642	192940000	130810000	62132000
TRL1	1	2	2	2.8	95.336	0.33007	7181000	5475400	1705600
BDH1	1	4	4	17.5	41.582	0.33043	46397000	27423000	18974000
TOP1	1	2	2	4.2	89.994	0.33126	9325100	4304800	5020300
GDA1	1	11	11	31.7	56.821	0.33165	239570000	138020000	101550000
NUP84	1	2	2	5.5	83.634	0.3342	12902000	7911800	4990400
NAS6	1	2	2	9.6	25.616	0.33481	44596000	34537000	10058000
RPS31;RPL40B;RPL40A;UBI4	4	8	8	61.8	17.216	0.33765	1922800000	785370000	1137500000
QCR10	1	2	2	26	8.5928	0.33927	25341000	15343000	9998000
SED5	1	3	3	11.5	38.807	0.34243	40947000	20391000	20555000
ENV7	1	3	3	10.7	40.748	0.34307	80591000	57356000	23234000
ATP16	1	5	3	37.5	17.02	0.3431	96585000	57570000	39016000
SIP5	1	1	1	5.7	55.859	0.35094	12877000	6613700	6263300
PRD1	1	9	9	20.2	81.933	0.35132	91649000	44696000	46953000
QCR7	1	4	4	50.4	14.565	0.35456	46161000	21743000	24418000
IXR1	1	5	5	11.9	67.855	0.35871	86154000	38892000	47261000
SEC23	1	5	5	12.5	85.384	0.35958	113000000	58749000	54253000
MCX1	1	3	3	7.1	57.945	0.36583	2881600000	1119900000	1761600000
YIP3	1	3	3	21.6	19.411	0.37413	43106000	24672000	18434000
SEC24	1	4	4	5.8	103.63	0.37434	35251000	19602000	15648000
CBP3	1	6	6	21.2	39.083	0.38044	51081000	34760000	16321000
TMA20	1	5	5	45.3	20.277	0.38164	38008000	15088000	22920000
SEC72	1	4	4	21.8	21.607	0.38252	30291000	17313000	12978000
ABF1	1	3	3	4.9	81.752	0.3848	22236000	13110000	9125600
OCH1	1	2	2	6.7	55.155	0.38551	19353000	10039000	9313800
YRA1	1	8	8	29.6	24.955	0.38854	311520000	167930000	143590000
HHO1	1	9	9	31.8	27.803	0.39017	123950000	67522000	56430000
SLY1	1	3	3	7.5	74.678	0.39075	26204000	13869000	12335000
PIL1	1	10	10	63.1	38.349	0.39434	1486000000	600070000	885940000
LOC1	1	3	3	18.1	23.59	0.39694	31342000	15801000	15541000
CHD1	1	4	4	3.6	168.24	0.39762	10147000	6121200	4025800
HMO1	1	6	6	27.2	27.544	0.39796	404580000	204640000	199940000
TOM70	1	22	22	59.3	70.122	0.39879	603990000	286640000	317350000
MAK21	1	7	7	10	116.68	0.39985	42632000	20692000	21940000
HTB2;HTB1	2	3	3	32.8	14.237	0.40012	1284100000	661790000	622290000
TIM13	1	2	2	21.9	11.286	0.40194	11250000	6400400	4849400
CKA2	1	5	5	18.3	39.403	0.4027	43135000	22583000	20552000
NIF3	1	4	4	19.4	31.888	0.4043	33034000	16423000	16611000
GOS1	1	2	2	19.7	25.394	0.40464	26112000	16379000	9733200
UBP1	1	4	4	9.4	92.768	0.4051	34885000	20392000	14493000
PTM1	1	2	2	4.4	60.018	0.40607	15172000	8378200	6793900
PHO87	1	2	2	3.8	102.54	0.40919	6838100	4622300	2215800
SRP40	1	3	3	8.4	41.015	0.41299	67967000	33738000	34230000
DST1	1	6	6	27.5	34.843	0.41693	87473000	43237000	44236000
SSA4	2	14	9	30.2	69.65	0.42384	629250000	474530000	154730000
DBP10	1	2	2	2.8	112.94	0.42535	14761000	7729900	7030700
MET14	1	6	6	42.1	23.06	0.42645	187020000	100520000	86504000
HEK2	1	4	4	14.2	41.682	0.42664	91240000	45120000	46120000
NIT3	1	4	4	18.9	32.549	0.43072	76056000	37688000	38369000
SHE2	1	2	2	10.2	28.251	0.43155	6631600	4124000	2507700
RPT1	1	3	3	11.1	51.982	0.43343	26103000	14200000	11903000
ACT1	1	9	9	48.5	41.689	0.43568	1368300000	660810000	707480000
SPC42	1	2	2	10.2	42.271	0.43595	10252000	5629500	4622900
2018-10-01	1	2	2	2.3	88.182	0.43737	655520000	281310000	374210000
RSC30;YHR054C	2	2	2	2.9	101.33	0.43739	14576000	8215500	6360400
RPD3	1	2	2	8.1	48.904	0.43817	12955000	6334000	6621500
SAR1	1	3	3	23.7	21.45	0.44374	33603000	17034000	16568000
ASK10	1	2	2	2.9	126.86	0.44568	7977500	4481100	3496400
SOF1	1	2	2	4.1	56.788	0.45464	18727000	8711200	10016000
APE2	2	7	7	11.6	107.75	0.45576	101480000	36040000	65444000
EXG2	1	2	2	3.7	63.507	0.45583	36378000	9447900	26930000
BCY1	1	14	14	47.4	47.218	0.45695	425930000	208400000	217530000
MCK1	1	3	3	14.1	43.135	0.45803	26410000	11281000	15129000
BRX1	1	3	3	17.5	33.531	0.46587	82063000	41035000	41028000
LSP1	1	11	11	54.3	38.071	0.46746	765180000	357570000	407610000
TOM5	1	2	2	28	5.9849	0.46792	45882000	29450000	16432000
BUL2	1	2	2	3.9	104.79	0.46935	6686800	4007000	2679800
TKL1	1	18	18	38.5	73.805	0.46998	2412000000	1095100000	1316800000
VPS5	1	3	3	9.2	76.483	0.47134	17864000	10126000	7738300
SIS1	1	15	15	45.7	37.59	0.47206	1250300000	617000000	633260000
NSR1	1	10	10	41.1	44.535	0.48098	483360000	217790000	265570000
RPA49	1	5	5	25.1	46.65	0.48297	64007000	34991000	29016000
SEC13	1	5	5	23.6	33.043	0.48532	150410000	65951000	84463000
HPT1	1	1	1	5	25.19	0.4855	17807000	7483900	10323000
CIS3	1	1	1	4.4	23.241	0.48644	100200000	47907000	52294000
NTH1	1	2	2	4.8	85.878	0.49006	21574000	10688000	10886000
NUP159	1	3	3	3.2	158.91	0.49203	7047900	4154000	2893900
UTP23	1	2	2	15.4	28.801	0.494	15188000	5623700	9564800
SEC1	1	2	2	4.1	83.479	0.49407	5911600	3184500	2727100
RAP1	1	3	3	6	92.412	0.49481	27200000	11783000	15417000
ERB1	1	5	5	10.8	91.704	0.49642	52318000	28756000	23563000
TRS23	1	4	4	27.9	24.863	0.49732	32488000	13638000	18850000
SNF1	1	4	4	11.8	72.045	0.49952	48029000	23395000	24634000
SKP1	1	3	3	26.8	22.33	0.50036	24786000	14354000	10432000
ESS1	1	4	4	37.6	19.404	0.50481	90725000	55460000	35265000
CDC48	1	24	24	46.7	91.995	0.50562	717660000	364860000	352800000
YDJ1	1	16	16	46	44.67	0.50794	1778400000	775710000	1002700000
OXA1	1	2	2	9.2	44.815	0.51425	25466000	11033000	14432000
ARP2	1	3	3	13	44.073	0.51676	52920000	23982000	28937000
LTP1	1	2	2	27.3	18.675	0.51855	29521000	13852000	15669000
TAL1	2	17	17	57	37.036	0.52049	1213200000	526690000	686490000
DJP1	1	3	3	11.3	48.574	0.52248	29479000	10161000	19318000
SSD1	1	4	4	4.1	139.95	0.52327	59553000	44472000	15081000
ARP3	1	8	8	33.4	49.541	0.53076	151440000	66950000	84494000
BFR2	1	4	4	11.8	61.202	0.53525	50101000	29465000	20636000
COX13	1	2	2	21.7	15.021	0.53855	23452000	10022000	13429000
RVB1	1	3	3	9.1	50.452	0.53888	29077000	13078000	15999000
CCS1	1	6	6	43.4	27.33	0.54458	107810000	47903000	59903000
ARC35	1	2	2	6.4	39.566	0.54587	16071000	8002500	8068600
DBP2	1	4	4	16.1	60.999	0.5481	67484000	29197000	38287000
ZPS1	1	2	2	12.9	27.567	0.55057	86677000	36605000	50072000
IMD3	1	15	7	51.8	56.584	0.5641	630580000	261250000	369340000
RVB2	1	3	3	7.4	51.611	0.56711	55547000	28974000	26574000
COX12	1	2	2	28.9	9.7878	0.56747	10797000	5582600	5213900
BNA3	1	2	2	5.2	50.082	0.57025	24696000	12448000	12248000
GGA2	1	5	5	11.5	64.346	0.57051	62733000	26963000	35770000
MAK5	1	2	2	4	87.047	0.57168	7151500	3523600	3627900
GPD2	1	7	6	30.9	49.421	0.57338	196160000	89801000	106360000
DBP9	1	3	3	10.9	68.059	0.57377	10273000	2787200	7485400
SDS22	1	5	5	22.5	38.887	0.57877	31597000	15928000	15669000
ERV41	1	2	2	7.7	40.705	0.58083	29581000	9730400	19851000
ADE2	1	7	7	17.7	62.339	0.58398	140580000	56389000	84196000
NHP2	1	3	3	25	17.122	0.58486	233340000	103390000	129940000
SAC6	1	11	11	29.4	71.772	0.5875	310800000	139300000	171500000
SMI1	1	3	3	9.5	57.079	0.59127	22272000	7535100	14736000
DBP3	1	7	7	21.4	58.826	0.59405	89032000	33652000	55379000
	1	2	2	11.8	27.521	0.59622	7639200	3846200	3793000
RRP5	1	11	11	10.6	193.13	0.5963	90333000	36117000	54216000
SNZ1;SNZ2;SNZ3	3	2	2	8.8	31.817	0.5983	15662000	7634800	8027000
RRS1	1	4	4	37.4	22.963	0.60224	130330000	44486000	85845000
COX6	1	2	2	17.6	17.341	0.60227	62424000	11997000	50427000
NOP1	1	10	10	40.1	34.465	0.60236	484740000	196140000	288600000
HXK1	1	18	17	55.9	53.738	0.60545	2341800000	981410000	1360400000
UFD1	1	2	2	11.4	39.81	0.60605	12152000	4964000	7187700
PBP4	1	2	2	11.9	19.881	0.60687	41329000	18519000	22809000
GPD1	1	7	6	28.6	42.868	0.61571	748910000	303520000	445390000
RTN2	1	5	5	23.7	44.358	0.61651	61995000	34280000	27715000
TEF1	1	24	24	65.1	50.032	0.62001	32159000000	13131000000	19028000000
RPB5	1	2	2	15.8	25.079	0.62078	29552000	11364000	18188000
GAR1	1	4	4	25.4	21.48	0.62337	94556000	51608000	42948000
IES6	1	2	2	13.9	18.533	0.62745	18892000	8313100	10579000
ADE3	1	23	23	37.3	102.2	0.62751	640180000	257770000	382400000
NOC2	1	8	8	13.4	81.6	0.62877	115310000	57247000	58062000
HRR25	1	4	4	11.3	57.339	0.6312	24014000	9250700	14763000
KRI1	1	6	6	13.9	68.653	0.6329	46670000	20762000	25909000
IMD4	1	11	9	40.6	56.393	0.63347	150710000	58890000	91819000
AMD1	1	2	2	4	93.3	0.63359	20927000	8103600	12824000
PAT1	1	4	4	10.2	88.51	0.64008	139770000	61468000	78302000
PNC1	1	4	4	41.7	24.993	0.6488	184860000	72669000	112190000
TIF4632	1	6	4	12	103.9	0.6522	39112000	18154000	20958000
BAT2	1	5	5	28.2	41.624	0.65471	80767000	34457000	46311000
RRP8	1	3	3	9.2	45.985	0.65768	38813000	16000000	22813000
TIM10	1	3	3	51.6	10.305	0.65907	16886000	7238700	9647000
ISW1	1	5	5	8	131.1	0.65985	29046000	12257000	16789000
RGD1	1	4	4	8	74.618	0.66439	23894000	10822000	13072000
HAS1	1	6	6	16	56.717	0.66578	95058000	38084000	56974000
EXG1	1	3	3	9.6	51.31	0.66797	48553000	17797000	30755000
EBP2	1	11	11	33.7	49.734	0.67275	208470000	83613000	124860000
PGM1	1	6	5	14.2	63.111	0.67424	19593000	7959600	11634000
ARP5	1	2	2	5	87.559	0.67582	10186000	4743000	5442600
NOP56	1	17	16	46.8	56.863	0.67742	721920000	280350000	441570000
COP1	1	10	10	13.5	135.61	0.67876	61272000	27320000	33952000
SHM2	1	18	18	59.5	52.218	0.68144	1293100000	507880000	785240000
NAB2	1	7	7	19.4	58.32	0.68237	90847000	35111000	55735000
YHB1	1	19	19	70.7	44.646	0.68697	1638200000	616310000	1021900000
RRP6	1	3	3	7	84.038	0.68738	23558000	9564600	13993000
IOC4	1	2	2	7.8	55.426	0.69063	12560000	4226100	8333400
RVS161	1	4	4	20.4	30.25	0.69306	97055000	44391000	52663000
SRP21	1	2	2	25.1	18.425	0.69355	41542000	23903000	17639000
CBF5	1	8	8	26.1	54.704	0.69536	200220000	76920000	123300000
APN1	1	5	5	20.7	41.439	0.69849	44875000	16305000	28570000
TMA46	1	8	8	31.3	39.514	0.70317	39162000	13718000	25444000
YTM1	1	3	3	13.3	51.358	0.70457	35054000	14248000	20807000
DHH1	1	3	3	6.9	57.543	0.70836	59362000	23307000	36056000
ARG1	1	6	6	23.6	46.927	0.70866	183920000	79091000	104830000
SNU13	1	2	2	11.9	13.569	0.70992	64420000	23423000	40996000
NOP4	1	9	9	19	77.824	0.7115	140140000	52400000	87743000
SRP1	1	2	2	4.4	60.441	0.71473	64861000	23333000	41528000
TMA7	1	6	6	42.2	6.9412	0.71478	567210000	212610000	354600000
RRB1	1	6	6	24.5	57.261	0.71517	61998000	21808000	40190000
EAP1	1	5	5	16.3	69.761	0.71698	34389000	12443000	21946000
TDH1	1	18	11	72	35.75	0.7234	2279200000	826030000	1453200000
PBP1	1	7	7	14.4	78.78	0.72406	77706000	24830000	52877000
CAJ1	1	6	6	28.4	44.854	0.72842	83879000	32387000	51492000
DBP5	1	6	6	21.4	53.873	0.72866	57518000	21919000	35598000
EMP70	1	3	3	8.1	75.962	0.72875	26322000	9421100	16901000
	1	3	3	15.9	33.593	0.72927	34816000	12048000	22767000
NOP14	1	2	2	3.1	94.301	0.73235	23513000	9126000	14387000
MYO5	1	4	2	8	136.9	0.73262	14213000	6286100	7926700
PUF3	1	4	4	5.6	98.067	0.73711	22081000	8461000	13620000
RVS167	1	8	8	24.1	52.774	0.73798	193650000	59947000	133710000
TAF6	1	2	2	5.6	57.901	0.73903	8595200	3447800	5147300
EMG1	1	3	3	16.7	27.895	0.74384	26903000	9544900	17358000
DUG1	1	13	13	39.9	52.871	0.74408	524770000	180080000	344690000
NOP7	1	11	11	27.6	69.876	0.7496	198370000	75295000	123070000
NOP58	1	13	12	35	56.956	0.75155	452340000	159810000	292530000
CIC1	1	10	10	32.7	42.529	0.75284	251480000	109210000	142260000
	1	2	2	6.3	39.976	0.75967	27446000	9534100	17912000
SMT3	1	1	1	10.9	11.597	0.76047	52454000	18445000	34008000
NOP15	1	2	2	12.7	25.447	0.76098	33439000	11788000	21650000
RPP2A	1	5	5	70.8	10.746	0.76273	491840000	179680000	312160000
IMD2	3	11	3	34.2	56.529	0.76488	24322000	11567000	12755000
PRP43	1	3	3	5.3	87.561	0.76591	49160000	18009000	31152000
RPL36A	1	7	2	45	11.124	0.76711	71617000	25322000	46295000
RPB4	1	3	3	24	25.414	0.77096	15252000	5846800	9405000
RPP1A	1	4	4	81.1	10.908	0.77256	359530000	126750000	232790000
TIF4631	1	14	12	24.7	107.1	0.77419	201120000	76840000	124280000
SRM1	1	7	7	21	53.013	0.77675	89055000	31718000	57336000
HEM13	1	5	5	32	37.711	0.77722	37249000	11781000	25468000
HSP26	1	6	6	34.1	23.879	0.77764	191490000	67283000	124200000
MET6	1	41	41	63.6	85.859	0.77856	4063900000	1400800000	2663100000
END3	1	2	2	9.2	40.297	0.77964	12564000	5555400	7008500
PWP1	1	3	3	9.4	63.803	0.7805	19328000	7164300	12164000
PAN5	1	4	4	15.6	42.821	0.78052	24739000	9478800	15260000
RPN1	1	5	5	8.4	109.49	0.78309	48762000	19747000	29016000
UBP3	1	7	7	10.6	101.92	0.78309	35321000	13605000	21717000
KRE33	1	5	5	7.2	119.35	0.78653	24756000	9600100	15156000
SEC16	1	2	2	2.2	241.69	0.78793	18216000	6705300	11511000
UTP25	1	3	3	6.8	83.99	0.7891	23764000	8453000	15311000
RPP1B	1	3	3	50	10.667	0.79025	249340000	76181000	173160000
SUP35	1	17	17	40.1	76.55	0.79065	349120000	116160000	232960000
GOR1	1	3	3	13.1	38.831	0.79074	16296000	4845800	11450000
KAP95	1	3	3	7.1	94.775	0.79223	28680000	10242000	18438000
DED1	1	11	11	31.5	65.552	0.79397	502810000	165180000	337640000
RPL24B	1	10	1	57.4	17.547	0.79409	3538100000	1128400000	2409800000
MPP6	1	3	3	32.3	21.142	0.7994	7691100	1047400	6643600
LSB3	1	3	2	11.3	49.343	0.8019	46426000	16318000	30107000
MBF1	1	8	8	57	16.403	0.8035	1035400000	343850000	691510000
PSP2	1	2	2	4.4	65.583	0.80472	21484000	8227400	13257000
TAF14	1	3	3	16.4	27.44	0.80701	53046000	30901000	22145000
YLR419W	1	4	4	3.3	163.04	0.81043	25271000	16757000	8514200
DOG2;DOG1	2	2	2	10.6	27.165	0.81137	18265000	7740300	10525000
PRI1	1	2	2	7.6	47.69	0.81415	84664000	28587000	56078000
RPF2	1	2	2	9	39.598	0.81496	7823700	3336200	4487500
NHP6A	1	2	2	47.3	10.802	0.81995	20928000	8578200	12350000
ARP4	1	2	2	3.9	54.831	0.82052	11203000	4494100	6708400
GLK1	2	12	12	33.4	55.377	0.82106	352850000	130290000	222560000
SPA2	1	2	2	2	163.14	0.8213	12057000	5651100	6405800
RPL28	1	13	13	74.5	16.721	0.82198	4839400000	1527400000	3312000000
SPT6	1	4	4	4.1	168.29	0.82223	14352000	6768400	7583700
SET2	1	3	3	5.9	84.46	0.82269	17327000	5999000	11328000
RPL34A	1	6	1	69.4	13.639	0.82381	190940000	67312000	123630000
NOP13	1	12	12	34.5	45.609	0.82417	184630000	68841000	115790000
GCN20	1	3	3	6.8	85.026	0.82423	21645000	8299800	13345000
ENT3	1	3	3	10	45.091	0.82455	36470000	12935000	23535000
YGR250C	1	2	2	5.4	89.512	0.83042	9426400	3005700	6420700
PBI2	1	3	3	32	8.5897	0.83354	14545000	4767300	9778100
RPL21B	1	10	2	72.5	18.274	0.83508	112220000	37724000	74500000
NSA2	1	3	3	17.2	29.722	0.83637	36331000	12982000	23350000
RPP2B	1	8	8	83.6	11.05	0.8373	430800000	146230000	284570000
TUP1	1	6	6	15.3	78.307	0.83745	87811000	26569000	61241000
RPL37A;RPL37B	2	5	5	54.5	9.8502	0.83876	371840000	118140000	253700000
SSB1	1	23	1	61.5	66.601	0.83918	391220000	115720000	275500000
ADH1	1	25	18	79	36.849	0.8435	10953000000	3398500000	7554900000
RPL3	1	24	24	55.8	43.757	0.84428	5778200000	1994800000	3783400000
RRP7	1	2	2	8.8	34.47	0.84476	16585000	5844400	10741000
XRN1	1	6	6	6.3	175.46	0.84625	37922000	12631000	25291000
RCK2	1	4	4	10.8	68.061	0.84631	30297000	11671000	18626000
HMX1	1	2	2	16.4	37.179	0.84752	61444000	18914000	42531000
GCY1	1	6	5	28.2	35.079	0.84783	100500000	31021000	69480000
PRE1	1	3	3	22.7	22.516	0.84838	32307000	10917000	21389000
RPB10	1	2	2	30	8.2776	0.84856	19710000	6130000	13580000
NAN1	1	3	3	4.9	101.24	0.8491	31087000	12105000	18981000
BMH2	1	12	4	60.8	31.061	0.85111	490780000	167970000	322810000
GFD1	1	2	2	9	21.571	0.8518	10975000	3549200	7425600
FES1	1	2	2	10.7	32.604	0.85335	15107000	9306100	5801200
SBP1	1	11	11	50.7	32.989	0.85395	431030000	142010000	289020000
NPL3	1	2	2	7.5	45.407	0.85416	104980000	34586000	70397000
YNK1	1	4	4	31.4	17.166	0.85481	68007000	23966000	44041000
IPP1	1	15	15	66.9	32.299	0.85574	1000800000	312830000	687930000
UGA1	1	9	9	30.4	52.946	0.85764	271040000	83894000	187140000
RPL2B;RPL2A	2	16	16	90.2	27.408	0.85945	3959800000	1279700000	2680100000
NOP2	1	16	16	30.4	69.811	0.86221	263350000	90832000	172520000
NPL6	1	3	3	13.3	49.65	0.86231	17691000	9629900	8061400
SER3	1	5	3	19	51.193	0.8625	53353000	17615000	35739000
RPL18B;RPL18A	2	4	4	33.3	20.563	0.8632	1575400000	542470000	1032900000
RPL21A	1	10	2	72.5	18.242	0.86386	2820200000	906360000	1913800000
RRP3	1	4	4	14	55.968	0.86435	43925000	28990000	14935000
RPL27A;RPL27B	2	11	11	75	15.531	0.86506	3970100000	1315600000	2654400000
RPC31	1	2	2	18.3	27.724	0.87257	11005000	2795200	8209500
GLO1	1	6	6	22.1	37.208	0.87304	62687000	17191000	45496000
	1	16	16	31.6	87.529	0.87323	372330000	161920000	210410000
HOM2	1	9	9	33.7	39.543	0.87374	579660000	175850000	403810000
SOD1	1	7	7	55.8	15.854	0.8758	535150000	166000000	369150000
	1	3	3	11.9	54.128	0.87599	29925000	9671800	20253000
RPL34B	1	6	1	69.4	13.641	0.87621	1828700000	597510000	1231200000
HXK2	1	16	15	59.3	53.942	0.87639	2061500000	663760000	1397800000
	1	5	5	24.7	33.934	0.87784	39144000	12535000	26609000
	3	11	11	39.9	41.164	0.8798	239120000	82600000	156520000
RPL15A;RPL15B	2	9	9	45.6	24.422	0.88142	2242800000	709680000	1533200000
OYE2	1	9	9	28.8	45.01	0.88318	369120000	120180000	248950000
RPL32	1	7	7	63.8	14.771	0.88417	2970300000	952950000	2017300000
MDY2	1	6	6	47.2	23.732	0.88449	91189000	29794000	61395000
RPL33A	1	5	1	57	12.154	0.88648	643160000	206500000	436660000
CPR1	1	14	13	96.9	17.39	0.8867	2563300000	834220000	1729100000
MET17	1	16	16	43	48.671	0.88771	3570800000	1132100000	2438700000
PGK1	1	30	30	76.2	44.738	0.89147	16153000000	5244600000	10908000000
NRD1	1	4	4	10.3	63.858	0.89222	26079000	9708400	16371000
SRP72	1	6	6	10	73.54	0.89225	31839000	11810000	20029000
RPL12B;RPL12A	2	7	7	58.2	17.822	0.89285	2682800000	867740000	1815100000
UTP8	1	4	4	9	80.19	0.89362	31118000	10138000	20979000
POB3	1	3	3	9.1	62.993	0.89505	55074000	17804000	37270000
ADH6	1	8	8	28.3	39.617	0.89812	96806000	31109000	65698000
RPL9B	1	14	3	83.2	21.657	0.8984	2001900000	639730000	1362100000
RPL36B	1	7	2	45	11.135	0.90036	1366400000	417980000	948440000
RPL25	1	8	8	57.7	15.757	0.90097	1859400000	583500000	1275900000
RPL43B;RPL43A	2	6	6	82.6	10.091	0.9014	447780000	142780000	305000000
AHA1	1	11	11	41.7	39.435	0.90148	361840000	107670000	254170000
RPN9	1	4	4	10.9	45.782	0.90173	98697000	80289000	18408000
KRR1	1	5	5	22.2	37.159	0.90441	31959000	10287000	21672000
	1	3	3	22	24.84	0.9062	15371000	6175600	9195700
SER33	1	5	3	14.9	51.188	0.90789	22014000	6186300	15828000
MRD1	1	5	5	7.9	101.12	0.90824	62695000	11702000	50993000
MAK16	1	2	2	11.1	35.695	0.90972	30577000	10403000	20174000
SQT1	1	3	3	9.3	47.166	0.91031	16420000	8103500	8316700
ADE13	1	9	9	22.8	54.51	0.91094	199670000	65061000	134600000
PGM2	1	15	14	43.9	63.088	0.9144	236680000	71766000	164910000
RPL42B;RPL42A	2	7	7	38.7	12.211	0.91441	1152800000	309920000	842840000
ENO1	1	24	11	76.2	46.816	0.91743	2897900000	942900000	1955000000
ALD6	1	23	23	60.6	54.414	0.91918	2948700000	890030000	2058600000
SSB2	1	23	1	61.5	66.594	0.91929	13419000000	4169900000	9249300000
ADE1	1	9	9	35.6	34.603	0.92013	269800000	88848000	180950000
SSE2	1	7	6	13.9	77.62	0.92052	57857000	19188000	38669000
RPL24A	1	10	1	57.4	17.613	0.92126	305150000	97448000	207700000
ADE17	1	20	16	59.8	65.262	0.92268	622260000	173720000	448550000
SSA2	1	33	11	59.8	69.469	0.92491	14665000000	4716700000	9948600000
RPL16A	1	9	7	44.2	22.201	0.92508	544570000	224060000	320510000
LSG1	1	6	6	16.9	72.727	0.9286	35988000	10062000	25926000
CEG1	1	2	2	6.8	52.764	0.92872	12228000	4502100	7726100
UBP6	1	6	6	22	57.11	0.9303	50829000	20720000	30110000
RPL8A	1	21	5	72.3	28.124	0.93203	728020000	230050000	497970000
FPR3	1	6	5	22.9	46.553	0.934	274620000	94176000	180450000
TPD3	1	4	4	9.4	70.907	0.93476	13602000	4935100	8666900
RPL23B;RPL23A	2	7	7	67.9	14.473	0.93826	568590000	175650000	392940000
RPE1	1	2	2	18.1	25.967	0.93896	16073000	4446500	11627000
SEC21	1	4	4	7.8	104.83	0.93965	29667000	9079200	20588000
SSA1	1	31	9	59.7	69.656	0.94165	2274600000	730020000	1544600000
RPA190	1	11	11	9.8	186.43	0.94173	104510000	30915000	73591000
FPR4	1	5	4	23.5	43.903	0.94287	63570000	19447000	44123000
TUM1	1	2	2	7.6	34.219	0.94367	7211000	2556200	4654800
SRP68	1	3	3	8.5	69.005	0.94484	21884000	6981700	14902000
ADE5,7	1	10	10	21.8	86.067	0.94642	231820000	71059000	160760000
RPN12	1	6	6	30.3	31.919	0.94811	76657000	24297000	52360000
RPL19B;RPL19A	2	9	9	51.3	21.704	0.94903	5522500000	1700000000	3822500000
ARO1	1	4	4	5.5	174.75	0.9541	20135000	6259000	13876000
ADE12	1	5	5	18.2	48.279	0.95417	73544000	28198000	45345000
SAS10	1	3	3	6.6	70.259	0.9545	61799000	24273000	37526000
RPL10	1	12	12	57.5	25.361	0.95545	5666700000	1674900000	3991800000
RPL8B	1	23	7	76.6	28.111	0.95893	12638000000	3779700000	8858200000
ARP9	1	3	3	7.1	53.074	0.95893	10874000	3495200	7379200
NOG2	1	7	7	18.7	55.488	0.95937	86283000	26639000	59644000
TPI1	1	14	14	90.3	26.795	0.96177	3437300000	1018500000	2418800000
RPL1B;RPL1A	2	14	14	62.7	24.485	0.96398	2538600000	781840000	1756800000
RLP7	1	3	3	9.9	36.559	0.96461	35389000	11221000	24168000
PRS5	1	2	2	9.1	53.504	0.96469	42107000	8441100	33666000
PUF6	1	4	4	6.2	75.105	0.96792	45053000	21089000	23964000
SEC27	1	6	6	16.5	99.444	0.96808	67079000	29659000	37420000
RPL16B	1	12	10	56.1	22.249	0.97164	1204500000	395380000	809170000
YPR1	1	7	6	35.3	34.755	0.97189	73030000	24099000	48931000
SPT16	1	9	9	12.4	118.63	0.9723	86253000	29744000	56509000
RFC1	1	2	2	2.9	94.902	0.97419	7707900	2730200	4977700
NOP12	1	7	7	19.6	51.941	0.97776	144000000	39782000	104220000
RPL6A	1	10	7	49.4	19.961	0.97857	623470000	183850000	439620000
PAA1	1	5	5	39.3	21.947	0.98028	48506000	17776000	30730000
MRT4	1	6	6	31.4	27.058	0.98092	107880000	32284000	75598000
RPL20B;RPL20A	2	7	7	44.2	20.437	0.98117	310680000	74413000	236270000
WTM1	1	10	10	31.6	48.382	0.98213	341150000	104460000	236690000
HSP42	1	5	5	17.6	42.816	0.98279	66136000	20696000	45440000
SGN1	1	2	2	10.4	28.954	0.98289	17952000	7539000	10413000
HNT1	1	3	3	34.2	17.679	0.98432	52300000	17299000	35001000
RPL13A	1	7	1	25.1	22.554	0.98448	554630000	164270000	390360000
RPL9A	1	13	2	83.2	21.569	0.98759	168580000	54335000	114240000
RKI1	1	7	7	45	28.258	0.98828	56657000	16517000	40140000
GLO2	1	4	4	23.4	31.326	0.98889	47370000	15400000	31970000
RPL4A	1	11	4	24.3	39.092	0.98914	3503100000	1085300000	2417800000
RPL6B	1	11	8	46	19.986	0.99273	1972000000	584210000	1387800000
ENT1	1	2	2	6.6	52.351	0.99416	15009000	5228200	9780400
CPR6	1	14	14	47.7	42.071	0.99453	806380000	572490000	233900000
TRR1	1	12	12	58	34.238	0.99602	351490000	100850000	250640000
EFG1	1	2	2	13.3	27.121	0.99612	10487000	3168100	7319000
RPL17A;RPL17B	2	11	11	75.5	20.549	0.99782	3269000000	982000000	2287000000
NAT5	1	2	2	23.3	19.726	0.99784	15928000	4426200	11502000
RPL30	1	5	5	65.7	11.415	0.9987	124180000	34731000	89449000
RSC8	1	5	5	12.2	63.167	0.99936	36557000	14151000	22406000
BMH1	1	13	5	62.9	30.091	1.0025	1418600000	416890000	1001700000
PYC1	1	6	1	8.2	130.1	1.0027	87083000	25243000	61840000
RPL14A	1	7	2	37.7	15.167	1.0027	470660000	211400000	259260000
RPL4B	1	11	4	24.3	39.062	1.0028	549430000	166280000	383150000
GPM1	1	19	19	89.5	27.608	1.0043	11050000000	3281000000	7769500000
SHP1	1	2	2	9.9	46.987	1.0049	19654000	6934500	12720000
TPA1	1	5	5	11.8	74.041	1.0059	37496000	13244000	24252000
RPL11B;RPL11A	2	11	11	58.6	19.749	1.0091	2145500000	634040000	1511500000
RPA43	1	2	2	5.5	36.224	1.0105	29055000	9990300	19065000
RPL7A	1	12	1	66	27.638	1.0115	5856200000	1746400000	4109800000
SOL3	1	2	2	15.3	27.784	1.0117	13118000	3557600	9560800
PRE2	1	2	2	9.1	31.636	1.0125	17283000	5568100	11715000
VIP1	1	4	4	7.2	129.75	1.0145	12313000	3483900	8829000
TDH2	1	20	2	67.8	35.846	1.0147	778020000	252490000	525530000
ZPR1	1	3	3	12.8	55.071	1.0149	22189000	6713800	15475000
PAB1	1	26	26	54.4	64.343	1.0164	2914400000	878340000	2036100000
PRE10	1	6	6	31.2	31.536	1.0164	124280000	33966000	90312000
DUT1	1	3	3	40.8	15.307	1.0178	58373000	14703000	43670000
RPL7B	1	12	1	66	27.696	1.0188	189020000	55604000	133420000
TRM2	1	4	4	7.5	72.851	1.0198	30376000	10057000	20319000
DUS3	1	3	3	5.1	76.595	1.0198	18121000	7797000	10324000
TFS1	1	9	9	58	24.357	1.023	115520000	32395000	83121000
MTD1	1	4	4	17.5	36.239	1.0279	47392000	15264000	32128000
ADE4	1	5	5	13.5	56.719	1.0318	121310000	37134000	84173000
UGP1	1	14	14	38.5	55.987	1.0322	592690000	174790000	417900000
ZWF1	1	9	9	27.9	57.521	1.0336	180710000	57972000	122730000
DLD3	1	17	17	50.6	55.224	1.0345	412240000	141270000	270970000
CPA2	1	11	11	19.1	123.91	1.0358	98285000	30692000	67593000
RPL31A;RPL31B	2	5	5	61.9	12.953	1.0364	779690000	221060000	558630000
HOM6	1	13	13	52.1	38.502	1.0366	538900000	146630000	392260000
RPL22A	1	5	4	76	13.693	1.0377	114010000	33498000	80509000
RET3	1	3	3	28.6	21.687	1.0396	17317000	7442500	9874800
RPN8	1	7	7	37.3	38.312	1.0398	38467000	11246000	27221000
CHC1	1	6	6	5	187.23	1.0399	32844000	10415000	22430000
YRA2	1	5	5	36.9	23.777	1.0411	53845000	17685000	36160000
TAN1	1	2	2	7.3	33.55	1.0446	15337000	4800900	10536000
ARP7	1	3	3	10.7	53.81	1.0454	14946000	4415700	10530000
URA3	1	7	7	39	29.239	1.0469	54752000	18867000	35885000
BEM2	1	2	2	2.4	245.43	1.0473	28966000	8587100	20379000
RPL38	1	6	6	64.1	8.8264	1.0474	222610000	68874000	153740000
RPB8	1	1	1	14.4	16.511	1.0553	8588100	2539500	6048600
RPL35B;RPL35A	2	9	9	65.8	13.909	1.0627	1374600000	359600000	1015000000
ARO2	1	14	14	67	40.838	1.0634	472230000	140820000	331400000
TUB1	1	6	5	20.6	49.799	1.0657	144390000	34298000	110090000
CDC28	1	2	2	11.7	34.061	1.0661	20834000	6657300	14177000
RPP0	1	7	7	33.3	33.717	1.0662	1493800000	430470000	1063300000
ENO2	1	32	19	84.2	46.914	1.0674	32778000000	9292700000	23485000000
RPN7	1	4	4	19.1	48.958	1.0698	45693000	12727000	32966000
MKT1	1	3	3	6.3	94.493	1.0703	132320000	120470000	11853000
CDC19	1	22	22	60.8	54.544	1.0746	9276500000	2614900000	6661600000
SRV2	1	10	10	31.6	57.521	1.0757	228300000	60562000	167740000
TEF4	1	17	16	55.1	46.52	1.0771	2260100000	671340000	1588700000
MAP2	1	5	5	22.3	47.518	1.0779	83216000	17339000	65877000
RPC82	1	2	2	5	74.016	1.079	7306000	2239000	5067000
ACC1	2	28	28	18.1	250.35	1.0796	621260000	185110000	436150000
COF1	1	5	5	67.8	15.901	1.082	220400000	59800000	160600000
GVP36	1	6	6	28.2	36.67	1.0846	140030000	70285000	69745000
FPR1	1	4	4	46.5	12.158	1.0859	289790000	74220000	215570000
MTR4	1	3	3	4.4	122.05	1.0861	15937000	6035200	9901400
TDH3	1	24	7	80.7	35.746	1.0879	35415000000	9961600000	25454000000
GRE3	1	8	8	24.2	37.118	1.0904	122710000	55927000	66782000
	1	7	7	58.7	22.151	1.0905	282540000	76368000	206170000
RPL13B	1	7	1	25.1	22.525	1.091	71307000	21164000	50143000
	1	2	2	24.5	12.401	1.0927	42092000	12878000	29214000
RPL26B;RPL26A	2	8	8	68.5	14.235	1.0948	2739300000	760600000	1978700000
GPH1	1	4	4	8.4	103.27	1.0958	34998000	14555000	20442000
RNR2	1	9	9	23.8	46.147	1.0984	308910000	85810000	223100000
GUA1	1	8	8	22.3	58.482	1.0997	143700000	41269000	102430000
RPC40	1	5	5	22.7	37.686	1.102	72295000	19453000	52842000
RTS1	1	1	1	3.4	85.334	1.1058	6472800	2573300	3899500
GCN1	1	4	4	2.2	296.69	1.1076	14899000	8879200	6019400
PRE5	1	5	5	37.2	25.604	1.1083	81001000	21997000	59004000
VAS1	1	27	27	36.1	125.77	1.1095	748930000	245700000	503230000
GCD14	1	2	2	6.5	43.919	1.1101	14419000	2805000	11614000
SAH1	1	17	17	42.8	49.125	1.1105	2882600000	766930000	2115700000
TPS2	1	4	4	6.7	102.98	1.1106	29898000	9723600	20174000
LYS20	1	5	2	17.1	47.098	1.113	26138000	7635900	18502000
TRP3	1	6	6	24.8	53.489	1.1135	47755000	8658600	39096000
THS1	1	10	10	18.8	84.519	1.1146	191940000	45366000	146570000
GND1	2	17	17	50.9	53.543	1.1157	941980000	257040000	684940000
RLI1	1	6	6	14.5	68.34	1.1161	146460000	42471000	103990000
RPN5	1	3	3	11.2	51.768	1.1173	57269000	15210000	42059000
PFK1	1	19	19	34.3	107.97	1.1183	588800000	158000000	430800000
HIS4	1	15	15	28.9	87.72	1.1201	226680000	68754000	157920000
RPL5	1	7	7	39.7	33.714	1.1205	509890000	133790000	376100000
AIP1	1	6	6	17.9	67.325	1.1226	42941000	14023000	28918000
FUN12	1	9	9	16.2	112.27	1.1267	154440000	53270000	101170000
HIS7	1	9	9	22.1	61.067	1.1273	110220000	26785000	83432000
SCP160	1	39	39	46.8	134.81	1.1274	927050000	300100000	626940000
UTP9	1	1	1	1.2	65.271	1.1274	795350000	255260000	540090000
CDC33	1	7	7	37.6	24.254	1.1307	320270000	87598000	232670000
THO1	1	5	5	36.7	24.137	1.1307	133450000	35916000	97529000
PTC3	1	2	2	7.3	51.331	1.1309	10464000	2943400	7520200
RNR4	1	10	10	40.9	40.054	1.1384	202950000	63671000	139280000
SLF1	1	2	2	6.9	50.942	1.1394	22610000	6164000	16446000
GLT1	1	5	5	3.3	238.1	1.1397	41941000	14836000	27105000
EFT1	1	26	26	38	93.288	1.1399	4556900000	1106500000	3450400000
TRX2	1	4	4	62.5	11.204	1.1402	123040000	44118000	78925000
SPE3	1	8	8	34.1	33.324	1.1404	228900000	60815000	168090000
RRP15	1	3	3	20	28.212	1.1421	40471000	13600000	26872000
SRP14	1	3	3	26	16.43	1.1438	23733000	7718200	16015000
GCD7	1	3	3	17.6	42.569	1.1472	20443000	4037600	16405000
PAN1	1	6	6	7	160.27	1.1475	50294000	16919000	33375000
RPN3	1	3	3	12.6	60.392	1.149	22727000	4603500	18123000
TYS1	1	12	12	44.7	44.019	1.1492	523370000	151020000	372340000
OLA1	1	10	10	46.4	44.174	1.1495	243610000	60776000	182830000
FRS1	1	15	15	43.5	67.364	1.1586	268990000	72834000	196150000
GPM2	1	2	2	7.7	36.073	1.1608	14207000	4573400	9633900
SED4	1	2	2	3.8	114.08	1.1615	17008000	8080700	8927000
PUP1	1	3	3	19.5	28.268	1.1624	71481000	23198000	48283000
SGT1	1	2	2	5.6	44.859	1.1654	11266000	3255700	8010000
HRI1	1	8	8	37.7	27.5	1.1659	169480000	47248000	122230000
SCL1	1	4	4	28.2	28.001	1.1664	19242000	4826700	14415000
YGR169C-A	1	4	4	55.4	10.495	1.1672	141260000	35402000	105860000
RPN2	1	8	8	12.5	104.23	1.1695	153580000	50439000	103140000
PRE9	1	4	4	26.7	28.714	1.1703	52376000	16471000	35905000
ARO3	1	6	6	27.3	41.069	1.1761	129280000	32909000	96374000
RIB5	1	2	2	10.1	26.195	1.1777	11964000	3517200	8447100
PGI1	1	22	22	55.6	61.298	1.1782	2181300000	634540000	1546700000
TSA1	1	5	5	39.3	21.589	1.1789	116060000	27668000	88391000
PTC2	1	4	4	14.2	50.388	1.1802	31664000	11011000	20653000
CAP1	1	5	5	28	30.699	1.1808	72893000	21338000	51554000
GBP2	1	3	3	10.1	48.728	1.1824	10419000	3394300	7025000
SUB1	1	3	3	9.6	33.102	1.1828	14747000	4915200	9832100
SEC26	1	6	6	10.3	109.02	1.1838	44876000	10698000	34178000
HRP1	1	3	3	10.7	59.649	1.1878	27775000	6216800	21558000
HTS1	1	8	8	23.4	59.952	1.1886	114970000	31058000	83915000
SEC14	1	7	7	36.8	34.9	1.1894	164380000	43765000	120610000
TMC1	1	4	4	40.7	16.734	1.1908	33334000	10097000	23238000
RAD27	1	5	5	17.3	43.279	1.1918	23581000	8380800	15200000
FBA1	1	25	25	77.7	39.62	1.196	8660500000	2159600000	6500900000
PNP1	1	2	2	9.3	33.755	1.1964	14676000	3764900	10911000
RPA135	1	4	4	7.3	135.74	1.199	24693000	6502200	18191000
PRP6	1	2	2	2	104.23	1.2001	7703500	2603800	5099700
SPN1	1	6	6	25.1	46.082	1.2037	74180000	19415000	54765000
NAT1	1	2	2	2.8	98.904	1.2077	20376000	7375800	13001000
BFR1	1	25	25	52.1	54.639	1.2084	1945300000	523730000	1421500000
STI1	1	29	29	56.5	66.264	1.2094	1598400000	424920000	1173500000
IKI3	1	2	2	1.6	152.99	1.2153	5719500	2405700	3313800
GCD11	1	13	13	35.7	57.865	1.2167	338320000	105870000	232460000
CYS4	1	26	26	71.6	56.021	1.2173	1195200000	299870000	895300000
PDC1	3	26	26	61.1	61.495	1.2221	30764000000	7961000000	22803000000
HMF1	1	6	6	73.6	13.906	1.2225	49320000	14454000	34866000
ERG20	1	13	13	49.7	40.483	1.2233	1194900000	296590000	898270000
FRS2	1	9	9	24.5	57.511	1.2243	159220000	29627000	129600000
ARO8	1	14	14	49.2	56.177	1.2243	463860000	108940000	354920000
ARO10	1	6	6	13.2	71.384	1.2245	77140000	18985000	58155000
CAM1	1	9	8	21.4	47.087	1.2254	455130000	123310000	331810000
TRX1	1	5	5	58.3	11.235	1.2271	86052000	23190000	62861000
RFA1	1	6	6	17.4	70.347	1.2277	67437000	16943000	50494000
PRE6	1	2	2	15	28.439	1.228	27052000	7411900	19640000
NPT1	1	5	5	20.5	49.018	1.2294	41722000	9517100	32205000
ARX1	1	3	3	8.8	65.212	1.2304	32870000	8512600	24358000
TSL1	1	7	6	8.4	123.02	1.2346	66583000	20028000	46555000
CYS3	1	7	7	19.8	42.542	1.2365	408550000	99810000	308740000
MCA1	1	2	2	10	47.982	1.2385	29251000	7439700	21811000
ARF3	1	2	2	26.8	20.696	1.239	45924000	35929000	9994200
RNQ1	1	2	2	10.6	42.579	1.2418	19912000	5447800	14464000
ADE16	1	11	7	33	65.282	1.2418	52387000	13964000	38423000
NOB1	1	4	4	13.5	51.741	1.243	29701000	7291000	22410000
RAD23	1	2	2	7	42.366	1.2453	31130000	7774900	23356000
MRP8	1	5	5	35.2	25.097	1.2471	37638000	9494700	28144000
MET22	1	3	3	15.4	39.149	1.2515	26218000	5638600	20579000
PRE8	1	5	5	29.6	27.162	1.2521	56897000	14980000	41917000
FRD1	1	3	3	10.6	50.843	1.2524	41800000	11909000	29892000
YPL260W	1	7	7	20.3	62.779	1.2546	76087000	18293000	57794000
ARC1	1	16	16	51.1	42.083	1.2554	948000000	235230000	712760000
GLN4	1	18	18	28.9	93.132	1.2575	432830000	116960000	315870000
	1	7	7	37.3	27.48	1.2614	187200000	45537000	141670000
PMI40	1	9	9	35.2	48.188	1.2668	113530000	30671000	82861000
HSP82	1	36	9	57.7	81.405	1.2692	302720000	70183000	232540000
TPS3	1	4	3	6.3	118.83	1.2712	14602000	3845000	10757000
NUP2	1	5	5	12.6	77.88	1.2747	24451000	4167600	20283000
ACS2	1	15	15	39.8	75.491	1.2753	871200000	213430000	657770000
GAD1	1	3	3	9.2	65.989	1.2756	29778000	6312200	23465000
HSP104	1	14	14	27.9	102.03	1.2792	319340000	98717000	220620000
CAR2	1	8	8	35.8	46.085	1.2812	293360000	71982000	221370000
SER1	1	11	11	47.3	43.415	1.283	257060000	97369000	159690000
MET5	1	12	12	16.8	161.22	1.2842	229400000	145240000	84165000
TIF5	1	16	16	59	45.261	1.2847	619080000	131960000	487120000
REP2	1	3	3	19.9	33.196	1.2863	15341000	4470600	10870000
ASN1	1	15	11	40.6	64.47	1.2872	235210000	55194000	180020000
GLO3	1	8	8	27	55.093	1.2873	156570000	29182000	127390000
AAH1	1	3	3	9.8	39.635	1.2923	27992000	8506200	19486000
ROK1	1	2	2	5.7	63.652	1.2956	23053000	8061000	14993000
PUB1	1	3	3	10.2	50.762	1.2957	147550000	35361000	112190000
ERG13	1	15	15	36	55.013	1.2976	512840000	129550000	383300000
GET4	1	2	2	9.3	36.28	1.3031	5689300	1249200	4440100
MRI1	1	4	4	19.5	45.02	1.3121	27233000	4449600	22784000
TRM5	1	2	2	5.2	56.514	1.3146	11509000	3251500	8257000
PRO3	1	4	4	21.7	30.131	1.3193	63829000	16335000	47494000
AHP1	1	10	10	70.5	19.114	1.3208	899160000	219020000	680130000
NOP53	1	5	5	15.6	52.555	1.3219	41342000	9875800	31466000
URA6	1	2	2	18.1	22.933	1.324	14115000	3946700	10169000
MVD1	1	4	4	17.7	44.115	1.3251	72184000	18652000	53532000
INO1	1	11	11	26.5	59.641	1.3294	161960000	34752000	127210000
ERG10	1	10	10	40.7	41.728	1.3376	325780000	80087000	245690000
ARG4	1	6	6	20.3	51.989	1.3404	102890000	23046000	79844000
SFA1	1	5	5	19.7	41.042	1.3413	71433000	24832000	46601000
ADE6	1	14	14	17	148.9	1.3424	119440000	39825000	79615000
URA2	1	21	21	17.1	245.04	1.3463	190200000	65555000	124640000
ARB1	1	14	14	28.5	68.376	1.3519	401660000	128590000	273070000
PFK2	1	10	10	18	104.62	1.358	359860000	79794000	280060000
GUS1	1	22	22	38.7	80.842	1.3608	611080000	162410000	448680000
RPN11	1	3	3	15.7	34.398	1.3621	4795600	1722700	3072900
DYS1	1	9	9	32.8	42.892	1.3643	143260000	36118000	107140000
SUI2	1	9	9	32.6	34.717	1.3696	215320000	55253000	160070000
DAK1	1	12	12	36	62.206	1.3699	225120000	85587000	139530000
PRS1	1	3	3	14.3	47.047	1.3707	53564000	12942000	40622000
PDX3	1	4	4	26.3	26.908	1.3752	80871000	17580000	63291000
NAP1	1	5	5	21.8	47.884	1.376	32554000	8053600	24500000
HSC82	1	41	14	61.6	80.899	1.3777	8153500000	1881600000	6271900000
ENP1	1	4	4	17.8	55.136	1.3782	38628000	8025500	30603000
CDC21	1	2	2	11.5	35.047	1.3807	9743600	2247400	7496200
	1	2	2	15	17.738	1.3886	17892000	4137100	13755000
MAP1	1	10	10	36.2	43.373	1.3887	179390000	45354000	134040000
DPS1	1	17	17	35.4	63.515	1.3919	931820000	269450000	662380000
	1	14	14	54.2	35.56	1.3926	409620000	99292000	310330000
ASN2	1	16	12	47.7	64.592	1.3928	459100000	118660000	340440000
YER156C	1	4	4	13.9	38.174	1.3931	36523000	12369000	24153000
THR4	1	21	21	43.4	57.474	1.3977	939550000	260590000	678960000
RBG1	1	3	3	13	40.701	1.3985	32589000	9192900	23396000
YGR054W	1	11	11	25.4	71.304	1.3987	125750000	39502000	86247000
TIF34	1	15	15	64	38.755	1.4003	298730000	79801000	218930000
PRS3	1	4	4	17.5	35.123	1.4011	68741000	16303000	52438000
EIS1	1	6	6	11.6	93.344	1.4015	177130000	81779000	95353000
DED81	1	12	12	29.6	62.206	1.4032	294660000	66615000	228040000
PRT1	1	14	14	31.6	88.129	1.4093	218180000	52479000	165700000
BCP1	1	7	7	29.3	32.661	1.4144	135380000	53561000	81824000
RPN6	1	6	6	20.3	49.773	1.4145	59516000	13097000	46420000
YPL225W	1	6	6	51.4	17.445	1.4257	79953000	17166000	62787000
HBS1	1	4	4	13.7	68.729	1.4274	20914000	2954100	17960000
ALA1	1	14	14	16.8	110.06	1.431	372280000	177600000	194680000
CTR9	1	2	2	2.6	124.71	1.4332	13016000	4190800	8825000
TRP2	1	10	10	32.9	56.767	1.4386	139970000	30589000	109380000
SES1	1	15	15	42	53.309	1.4396	717340000	178940000	538400000
KRS1	1	19	19	48.2	67.958	1.4409	1250200000	294720000	955500000
ADO1	1	9	9	42.6	36.372	1.4419	299050000	78284000	220760000
HCR1	1	3	3	19.6	29.564	1.4442	104690000	38892000	65803000
YLR257W	1	4	4	24.6	35.998	1.4486	34448000	5594200	28854000
UBC4;UBC5	2	2	2	14.2	16.456	1.4548	68609000	11887000	56722000
HCA4	1	2	2	4.9	87.192	1.4567	9558600	3313800	6244800
PFY1	1	3	3	24.6	13.677	1.4575	33082000	8092400	24990000
RRP17	1	2	2	9.8	27.974	1.458	28127000	7323000	20804000
LHP1	1	8	8	35.3	32.104	1.4585	168880000	44252000	124630000
UBA1	1	7	7	9.8	114.26	1.4608	46438000	15557000	30881000
GLN1	1	4	4	31.9	41.766	1.4634	131230000	29639000	101590000
RPT6	1	8	8	23.5	45.271	1.4638	83754000	22068000	61685000
YDL086W	1	2	2	12.5	30.837	1.4677	6589300	1790600	4798700
ARF2;ARF1	2	2	2	19.9	20.657	1.4682	7017900	2544900	4473000
NOG1	1	9	9	19.5	74.409	1.4731	101830000	24084000	77745000
GSP2;GSP1	2	7	7	28.6	24.99	1.474	327580000	60806000	266780000
RPS23B;RPS23A	2	8	8	57.9	16.038	1.4741	2142300000	461240000	1681100000
EGD1	1	7	7	61.8	17.02	1.4741	665640000	138270000	527370000
NIP1	1	4	4	6.4	93.203	1.4747	76458000	18637000	57821000
MES1	1	10	10	16.6	85.677	1.4764	196380000	49157000	147220000
FSH1	1	5	5	36.6	27.339	1.4769	85823000	16703000	69120000
RNA1	1	5	5	20.6	45.815	1.4794	65887000	13989000	51899000
RPS26B	1	5	1	69.7	13.447	1.4821	679700000	156800000	522900000
RPS4B;RPS4A	2	18	18	81.2	29.41	1.4912	2945000000	644580000	2300400000
RPS1A	1	19	5	72.5	28.743	1.492	1088600000	158590000	930030000
ARC40	1	2	2	10.9	42.474	1.4925	17689000	3917100	13772000
NCL1	1	19	19	41.1	77.878	1.4941	374040000	89043000	284990000
CCT3	1	7	7	21	58.814	1.4961	74622000	15981000	58640000
WRS1	1	7	7	25.2	49.35	1.4985	223730000	45991000	177740000
	1	5	5	26.8	29.123	1.4988	43980000	12900000	31080000
RPS2	1	13	13	74	27.449	1.5016	1796000000	377510000	1418500000
TCP1	1	6	6	19.9	60.48	1.5057	101190000	29231000	71962000
DCS1	1	5	5	20	40.769	1.5082	68603000	15252000	53351000
URA4	1	2	2	8.5	40.313	1.5137	16922000	5317700	11605000
YHR020W	1	20	20	44	77.385	1.5205	363770000	78815000	284960000
CRM1	1	3	3	3.4	124.1	1.5255	20587000	5349500	15237000
CCT4	1	7	7	19.3	57.603	1.5338	61667000	14867000	46800000
URA5	1	3	3	21.2	24.664	1.541	43257000	8917100	34340000
RPS3	1	3	3	16.7	26.502	1.5421	1106700000	219410000	887290000
YKL033W-A	1	2	2	14.8	26.17	1.5421	19182000	5111300	14071000
	1	4	4	17.5	38.215	1.5433	44731000	11144000	33587000
RPS11B;RPS11A	2	10	10	65.4	17.749	1.5647	1679700000	369460000	1310300000
RPS8B;RPS8A	2	13	13	61.5	22.489	1.5649	2135300000	457730000	1677600000
NEW1	1	12	12	14.1	134.33	1.565	127540000	27834000	99704000
APT1	1	3	3	18.2	20.587	1.5664	74201000	15308000	58893000
NMD3	1	3	3	9.3	59.095	1.5742	11000000	2515600	8484800
GCD1	1	4	4	12.1	65.699	1.5782	33845000	8379900	25465000
RPS1B	1	19	5	72.2	28.812	1.5832	6940200000	1417600000	5522500000
DNM1	1	3	3	5.9	84.971	1.5892	22320000	5461000	16859000
NUG1	1	10	10	26.7	57.708	1.5908	148870000	37177000	111690000
IRC24	1	2	2	11	28.804	1.5908	10698000	3007200	7690700
CDC60	1	22	20	25.9	124.14	1.5909	260930000	83077000	177850000
TIF11	1	5	5	39.2	17.435	1.5912	287590000	61487000	226100000
PUS1	1	8	8	21.3	62.142	1.5948	88020000	19450000	68570000
ALD3	1	3	1	10.1	55.385	1.6034	18816000	5352800	13463000
LYS21	1	8	5	33.2	48.594	1.6084	127780000	26809000	100980000
QRI1	1	6	6	16.1	53.475	1.6093	37127000	9905300	27222000
CTT1	1	7	7	21.2	64.583	1.6138	89497000	18496000	71001000
MET13	1	2	2	5.3	68.559	1.6165	7394300	2320900	5073400
ZUO1	1	17	17	49	49.019	1.6248	1371400000	334400000	1037000000
RPS27B;RPS27A	2	3	3	50	8.8653	1.6248	1848100000	368280000	1479800000
PSE1	1	2	2	3.5	121.03	1.6308	4375000	1139800	3235200
NOP6	1	3	3	22.2	25.216	1.6369	45117000	13593000	31524000
SLA2	1	2	2	3.6	108.91	1.6404	11277000	2500000	8776800
HCH1	1	4	4	30.7	17.246	1.6425	47322000	9649200	37672000
MTC1	1	6	6	15.1	53.477	1.6426	60352000	16287000	44066000
SUP45	1	12	12	38.7	49.005	1.6444	144640000	33735000	110900000
	2	5	5	28.6	26.864	1.6457	63063000	12925000	50138000
CMP2	1	2	2	4.6	68.527	1.6489	12654000	2996300	9658100
IDI1	1	3	3	16.3	33.351	1.6571	39778000	7660000	32118000
RPS25B	1	5	1	61.1	12.009	1.6578	1329200000	255290000	1073900000
SSE1	1	29	28	49.1	77.365	1.6718	2300400000	474140000	1826200000
FAS1	1	39	39	31.6	228.69	1.6783	908980000	212110000	696870000
RPS29B	1	4	4	94.6	6.7276	1.6784	187290000	33677000	153610000
TPS1	1	7	7	21.8	56.147	1.6793	126690000	30035000	96652000
ADK1	1	7	7	49.5	24.254	1.68	104420000	23688000	80732000
RPS21B;RPS21A	2	5	5	51.7	9.7597	1.6831	375020000	71581000	303440000
REH1	1	4	4	13.7	49.689	1.6838	18513000	3752800	14760000
RPS20	1	9	9	60.3	13.907	1.6866	3414400000	621080000	2793300000
RPT2	1	9	9	35.7	48.828	1.6867	183020000	42546000	140470000
SFM1	1	4	4	26.8	24.743	1.6874	27330000	6398900	20931000
RPS7B	1	15	7	68.4	21.634	1.6933	1564800000	285090000	1279700000
CEX1	1	3	3	4.7	84.768	1.6958	13106000	3305100	9800900
FAS2	1	46	46	37	206.94	1.6975	1025500000	234570000	790890000
FUR1	1	5	5	39.8	24.594	1.7009	107890000	16275000	91618000
RPS22B;RPS22A	2	3	3	35.4	14.626	1.7015	354920000	68306000	286610000
RPS13	1	5	5	35.8	17.029	1.7017	355080000	67121000	287960000
RPS15	1	2	2	15.5	16.002	1.7018	443280000	85950000	357330000
RPS5	1	6	6	44.4	25.038	1.7034	944110000	176400000	767710000
SEC31	1	14	14	18.7	138.72	1.7036	113190000	24029000	89157000
ARA1	1	3	3	14.5	38.883	1.7094	33204000	9284300	23919000
PUP2	1	5	5	26.9	28.617	1.7166	45692000	13272000	32420000
TDA3	1	3	3	8.2	57.613	1.7208	13968000	2427400	11540000
RIB4	1	3	3	42	18.555	1.7256	8214300	1803300	6411000
RPS24B;RPS24A	2	12	12	80	15.329	1.7288	3328700000	688970000	2639800000
PAF1	1	2	2	6.7	51.8	1.7312	18795000	3436100	15358000
CCT2	1	7	7	19.2	57.203	1.7403	72621000	19306000	53314000
PSA1	1	15	15	55.1	39.565	1.7458	1057100000	231290000	825780000
RPS17B;RPS17A	2	6	6	64.7	15.803	1.7602	1125600000	225640000	899940000
RPS14A	1	6	1	64.2	14.536	1.7735	1347000000	300080000	1046900000
RPS18B;RPS18A	2	9	9	74.7	17.037	1.7736	2384500000	481680000	1902900000
RPS29A	1	4	4	94.6	6.6606	1.7747	443010000	87393000	355620000
RPT4	1	3	3	8.7	49.408	1.7748	64397000	16798000	47599000
SEC28	1	3	3	14.9	33.829	1.7756	7131700	952480	6179200
TMA19	1	5	5	26.9	18.741	1.7767	958610000	190030000	768580000
ABP1	1	8	8	25.5	65.575	1.7811	343120000	101080000	242040000
SRO9	1	9	9	32	48.059	1.7819	348360000	67806000	280550000
VPS74	1	3	3	13.9	39.286	1.7836	14229000	3476900	10753000
	1	8	8	16.1	69.524	1.7908	173730000	33593000	140130000
GCS1	1	5	5	21.6	39.296	1.7977	94945000	44098000	50847000
	1	10	10	46.8	33.955	1.804	119330000	31780000	87550000
RPS30B;RPS30A	2	3	3	61.9	7.1184	1.8151	26543000	7851500	18692000
ASF1	1	3	3	12.9	31.603	1.8196	27015000	7177200	19838000
RPS19B	1	8	1	83.3	15.891	1.8207	1831400000	355350000	1476100000
ADH4	1	14	14	54.7	41.142	1.8216	360530000	67167000	293360000
PRO2	1	8	8	29.6	49.74	1.8243	159740000	39333000	120410000
ARO7	1	5	5	28.9	29.747	1.8405	39692000	8649400	31043000
RPS26A	1	5	1	69.7	13.505	1.8415	347140000	66583000	280560000
CAR1	1	8	8	35.1	35.662	1.8469	148970000	42283000	106680000
ASC1	1	17	17	94	34.805	1.8565	1135500000	207240000	928240000
CKI1	1	5	5	12.2	66.316	1.8608	33404000	10651000	22753000
RPB2	1	2	2	2.9	138.75	1.8616	6036000	1796700	4239300
RTF1	1	3	3	7.2	65.868	1.8644	25953000	5867400	20085000
GDH1	2	19	19	68.1	49.569	1.8656	772310000	179160000	593150000
RPS0B	1	3	2	29.4	27.962	1.8705	96445000	17441000	79004000
GRS1	1	20	20	43.8	78.183	1.8743	775350000	166360000	608990000
STM1	1	18	18	70.3	29.995	1.8755	7032100000	1197900000	5834200000
CSL4	1	3	3	18.2	31.583	1.8806	9394700	2435800	6958900
TRP5	1	21	21	45.8	76.625	1.8812	560990000	108790000	452200000
APA1	1	6	6	28	36.492	1.8851	72098000	14380000	57718000
SUB2	1	10	10	28	50.308	1.8882	354640000	110780000	243870000
RPS7A	1	15	7	75.8	21.622	1.8905	779630000	146370000	633260000
SVF1	1	8	8	27.7	54.367	1.893	192430000	18928000	173500000
	1	7	7	43.8	29.158	1.8943	102850000	21426000	81421000
RPS16B;RPS16A	2	9	9	57.3	15.847	1.9002	711600000	130880000	580730000
RPG1	1	25	25	28.6	110.34	1.9073	568730000	230150000	338580000
TRM8	1	3	3	13.6	33.391	1.9157	19483000	4105000	15378000
DEF1	1	4	4	9.5	83.972	1.9201	23056000	3408900	19647000
PRO1	1	3	3	12.4	47.162	1.926	42582000	11306000	31276000
ASP1	1	4	4	14.4	41.395	1.9299	51789000	10120000	41670000
TIF1	1	9	9	39	44.697	1.9321	513450000	93096000	420350000
EGD2	1	6	6	60.9	18.709	1.9411	314060000	56388000	257670000
SAM1	1	15	9	68.3	41.818	1.9592	569260000	87393000	481860000
CAF20	1	3	3	33.5	18.223	1.9692	42531000	5927100	36604000
RPS9B	1	7	1	51.8	22.298	1.9794	650460000	148620000	501830000
UBC1	1	3	3	26	24.178	1.9988	87104000	66052000	21052000
HAT1	1	2	2	5.6	43.872	2.0099	9567300	2230800	7336500
GPP2	1	9	3	32	27.813	2.0242	97337000	16853000	80484000
ILS1	1	12	12	18.2	122.98	2.0365	102800000	26338000	76463000
RPS6B;RPS6A	2	14	14	59.7	26.996	2.0409	6468600000	1120100000	5348500000
SAM2	1	17	11	75	42.255	2.0462	1808700000	337840000	1470800000
YGR130C	1	2	2	4.3	92.697	2.0506	3707700	1073200	2634500
CCT7	1	8	8	24.4	59.735	2.0587	45875000	8831400	37044000
TUB2	1	5	5	22.8	50.922	2.0702	56344000	13297000	43046000
SAM4	2	3	3	14.5	36.668	2.075	33897000	7186500	26711000
CCT6	1	6	6	14.3	59.923	2.0757	38920000	6449800	32470000
RPS12	1	6	6	58.7	15.471	2.0758	936700000	162610000	774090000
HSP12	1	3	3	50.5	11.693	2.0791	45818000	8582600	37235000
SSZ1	1	17	17	50.9	58.237	2.0851	737520000	132550000	604970000
RPT5	1	5	5	20	48.255	2.0999	58401000	9379400	49022000
GLY1	1	5	5	20.7	42.815	2.1027	114080000	24924000	89153000
ARO4	1	10	10	49.7	39.749	2.1058	622540000	107940000	514600000
DCS2	1	4	4	16.4	40.94	2.1112	13081000	3766300	9314700
KAP123	1	12	12	16.5	122.6	2.1136	242030000	66450000	175580000
YEF3	2	41	41	51.9	115.94	2.1175	4911100000	815560000	4095600000
RPS10A;RPS10B	2	6	6	40	12.739	2.1271	734820000	121550000	613270000
PPX1	1	3	3	10.3	45.051	2.1828	23666000	6448000	17218000
ARI1	1	4	4	25.1	38.083	2.1979	35401000	11907000	23493000
EFB1	1	9	9	51	22.627	2.206	341840000	63227000	278610000
YPR148C	1	6	6	28.7	49.279	2.2065	36112000	3305800	32806000
SGT2	1	10	10	33.8	37.218	2.2079	143020000	22321000	120700000
YRB1	1	4	4	30.8	22.953	2.2179	161130000	29012000	132120000
URA7	1	10	10	22.5	64.71	2.2191	141890000	28952000	112930000
GPP1	1	20	14	85.2	27.947	2.2252	2236600000	506490000	1730100000
TMA22	1	6	6	23.2	22.495	2.2369	21064000	2504500	18559000
NOP16	1	2	2	10.4	26.901	2.2447	37160000	7090300	30070000
GUK1	1	8	8	64.7	20.637	2.2543	504690000	95240000	409450000
CCT8	1	12	12	31.5	61.662	2.3243	120890000	19834000	101050000
SLX9	1	3	3	21	24.069	2.3761	24668000	5525500	19142000
LEU1	1	12	12	25.2	85.793	2.3787	279570000	63907000	215660000
POL30	1	2	2	7	28.916	2.4249	10413000	2114600	8298600
HYP2	2	11	11	91.1	17.114	2.4373	2021700000	315180000	1706500000
LSM12	1	2	2	12.8	21.313	2.5103	6714500	1324000	5390500
TIF35	1	4	4	27	30.501	2.5333	62786000	11115000	51671000
TAE1	1	2	2	10.8	26.067	2.614	13368000	2040000	11328000
SUI3	1	10	10	38.6	31.574	2.7281	277870000	40548000	237320000
NMT1	1	2	2	5.7	52.837	2.8785	11366000	3278600	8087800
CDC37	1	6	6	23.3	58.384	2.9113	28649000	4201400	24447000
CCT5	1	12	12	35.4	61.913	2.9227	89760000	13165000	76595000
CLU1	1	18	18	21.5	145.16	2.9233	245240000	47748000	197490000
SEC53	1	10	10	55.9	29.063	2.9684	862240000	109550000	752690000
ERG8	1	3	3	11.1	50.454	3.1486	9394400	2322700	7071700
RPT3	1	3	3	10	47.893	3.2101	37119000	7283300	29836000
DRE2	1	5	5	18.1	38.542	4.2054	38252000	6483400	31769000
TIF3	1	4	4	17.2	48.521	5.4825	56807000	5427300	51380000
