# Supplementary material for: A systematic approach to identify recycling endocytic cargo depending on the GARP complex
Source: eLife. 2019 Jan 29;8:e42837. doi: 10.7554/eLife.42837 (PMC6374077; doi:10.7554/eLife.42837)
Supplement: Figure 4—source data 1. [file elife-42837-fig4-data1.xlsx]

## Sheet: proteingroupsA
Gene names	Number of proteins	Peptides	Razor + unique peptides	Unique peptides	Peptides cell t0	Peptides cell t30	Peptides cell t60	Peptides cell t90	Peptides vac t0	Peptides vac t30	Peptides vac t60	Peptides vac t90	Mol. weight [kDa]	Sequence length	Ratio H/L normalized cell t0	Ratio H/L normalized cell t30	Ratio H/L normalized cell t60	Ratio H/L normalized cell t90	Ratio H/L normalized vac t90	Ratio H/L normalized vac t60	Ratio H/L normalized vac t30	Ratio H/L normalized vac t0	Intensity	Intensity L	Intensity H	Intensity cell t0	Intensity L cell t0	Intensity H cell t0	Intensity cell t30	Intensity L cell t30	Intensity H cell t30	Intensity cell t60	Intensity L cell t60	Intensity H cell t60	Intensity cell t90	Intensity L cell t90	Intensity H cell t90	Intensity vac t90	Intensity L vac t90	Intensity H vac t90	Intensity vac t60	Intensity L vac t60	Intensity H vac t60	Intensity vac t30	Intensity L vac t30	Intensity H vac t30	Intensity vac t0	Intensity L vac t0	Intensity H vac t0
YPR010C-A	1	1	1	1	0	0	1	0	0	1	1	1	7.9021	72	NaN	NaN	NaN	NaN	NaN	NaN	1.0073	0.83861	927770000	523500000	404270000	0	0	0	0	0	0	5666900	1962200	3704700	0	0	0	0	0	0	90350000	48878000	41472000	504180000	282800000	221380000	327580000	189860000	137720000
STE2	1	1	1	1	0	0	0	0	0	0	1	0	47.848	431	NaN	NaN	NaN	NaN	NaN	NaN	NaN	NaN	3422800	3422800	0	0	0	0	0	0	0	0	0	0	0	0	0	0	0	0	0	0	0	3422800	3422800	0	0	0	0
CET1	1	10	10	10	7	4	5	3	0	0	1	0	61.849	549	1.0239	0.91012	0.99891	1.2652	NaN	NaN	NaN	NaN	5299500000	2883700000	2415800000	2849200000	1576900000	1272300000	1290500000	709600000	580940000	669880000	336620000	333250000	468570000	253570000	215000000	0	0	0	0	0	0	21343000	7039400	14303000	0	0	0
COQ4	1	1	1	1	1	0	0	0	0	0	1	0	38.627	335	NaN	NaN	NaN	NaN	NaN	NaN	NaN	NaN	46978000	23943000	23035000	31634000	15898000	15736000	0	0	0	0	0	0	0	0	0	0	0	0	0	0	0	15344000	8045400	7299000	0	0	0
TY1B-H	1	39	1	0	26	24	21	17	19	13	19	20	202.81	1793	NaN	NaN	NaN	NaN	NaN	NaN	NaN	NaN	86965000	53694000	33271000	40194000	25335000	14859000	0	0	0	28130000	16847000	11282000	18641000	11512000	7129000	0	0	0	0	0	0	0	0	0	0	0	0
THP2	1	5	5	5	0	1	1	4	0	0	0	0	30.299	261	NaN	NaN	NaN	1.4377	NaN	NaN	NaN	NaN	403770000	195900000	207880000	0	0	0	37308000	19658000	17650000	124610000	70367000	54242000	241860000	105870000	135980000	0	0	0	0	0	0	0	0	0	0	0	0
RPN13	1	2	2	2	1	1	2	2	0	0	0	0	17.902	156	NaN	NaN	NaN	NaN	NaN	NaN	NaN	NaN	5268500000	2815600000	2452900000	1415900000	826170000	589710000	1286500000	691900000	594600000	1536400000	743800000	792590000	1029700000	553690000	476020000	0	0	0	0	0	0	0	0	0	0	0	0
YBR085C-A	1	5	5	5	5	4	3	4	0	0	0	0	9.4044	85	1.0265	1.5011	1.6519	1.8848	NaN	NaN	NaN	NaN	7004600000	3304300000	3700300000	1994500000	1099600000	894930000	2405300000	1027700000	1377600000	1467000000	728990000	738060000	1137700000	448010000	689730000	0	0	0	0	0	0	0	0	0	0	0	0
MDM35	1	2	2	2	2	1	1	1	0	0	0	0	9.7119	86	1.0798	1.1404	NaN	NaN	NaN	NaN	NaN	NaN	2175500000	1107800000	1067700000	1224800000	625700000	599050000	778000000	402530000	375470000	121570000	59640000	61934000	51191000	19923000	31268000	0	0	0	0	0	0	0	0	0	0	0	0
TY1A-PR1;TY1A-A;TY1A-DR4;TY1A-NL2;TY1A-ML1	5	16	2	0	11	11	11	9	11	10	10	10	49.072	440	0.68209	NaN	NaN	NaN	NaN	NaN	NaN	NaN	536980000	353520000	183460000	536980000	353520000	183460000	0	0	0	0	0	0	0	0	0	0	0	0	0	0	0	0	0	0	0	0	0
TIM9	1	3	3	3	2	1	1	1	1	1	2	1	10.202	87	1.0845	NaN	NaN	0.96044	NaN	NaN	NaN	NaN	269700000	152320000	117370000	76433000	44253000	32180000	0	0	0	53326000	33313000	20012000	121710000	64165000	57542000	0	0	0	0	0	0	18229000	10594000	7635900	0	0	0
MRP10	1	2	2	2	0	0	0	0	1	2	1	1	10.69	95	NaN	NaN	NaN	NaN	NaN	1.004	NaN	NaN	524430000	316630000	207800000	0	0	0	0	0	0	0	0	0	0	0	0	61032000	42251000	18781000	119790000	72599000	47188000	185210000	108090000	77118000	158400000	93692000	64713000
SEM1	1	5	5	5	3	1	3	3	0	0	0	0	10.386	89	1.2273	NaN	1.1405	1.3535	NaN	NaN	NaN	NaN	840130000	433900000	406240000	281140000	140120000	141020000	9857500	5317600	4539900	311520000	171430000	140100000	237610000	117030000	120580000	0	0	0	0	0	0	0	0	0	0	0	0
QCR6	1	3	3	3	2	1	2	0	0	0	0	0	17.257	147	1.1167	NaN	1.9094	NaN	NaN	NaN	NaN	NaN	2856900000	1299100000	1557800000	1792700000	874880000	917780000	38679000	18201000	20478000	1025600000	406070000	619510000	0	0	0	0	0	0	0	0	0	0	0	0	0	0	0
COX2	1	1	1	1	1	1	1	1	0	0	0	0	28.567	251	NaN	NaN	NaN	NaN	NaN	NaN	NaN	NaN	297660000	166570000	131090000	90589000	54497000	36092000	70910000	38195000	32715000	70923000	38257000	32665000	65237000	35618000	29619000	0	0	0	0	0	0	0	0	0	0	0	0
COX5A	1	3	2	2	1	1	1	1	0	2	3	2	17.14	153	NaN	NaN	NaN	NaN	NaN	NaN	0.84039	NaN	165320000	102880000	62441000	0	0	0	0	0	0	0	0	0	0	0	0	0	0	0	13076000	8592300	4483200	101820000	62268000	39548000	50424000	32015000	18409000
COX6	1	4	4	4	4	4	4	3	0	0	0	0	17.341	148	1.0666	1.0399	1.012	1.0043	NaN	NaN	NaN	NaN	10391000000	5719300000	4671900000	3303000000	1805500000	1497600000	3768900000	2091900000	1677100000	2125300000	1161600000	963690000	1194000000	660370000	533610000	0	0	0	0	0	0	0	0	0	0	0	0
HIS1	1	6	6	6	5	3	3	2	0	0	0	1	32.266	297	0.976	1.0204	0.7785	0.86182	NaN	NaN	NaN	0.89525	4805700000	2746300000	2059400000	1477500000	860990000	616500000	1250200000	680330000	569880000	1284100000	749350000	534760000	749390000	428480000	320910000	0	0	0	0	0	0	0	0	0	44510000	27119000	17390000
CDC8	1	2	2	2	1	1	1	1	0	0	0	1	24.687	216	NaN	NaN	NaN	NaN	NaN	NaN	NaN	NaN	200390000	101690000	98700000	0	0	0	0	0	0	69684000	39315000	30369000	69052000	42271000	26781000	0	0	0	0	0	0	0	0	0	61658000	20108000	41550000
CAR1	1	9	9	9	6	6	6	6	1	1	3	2	35.662	333	1.0599	1.0232	1.183	1.2145	NaN	NaN	1.252	0.89338	15177000000	7928300000	7248700000	3781600000	2125400000	1656100000	3675000000	1884600000	1790500000	3578000000	1841300000	1736700000	3946300000	1969200000	1977100000	51735000	28103000	23632000	39902000	22543000	17358000	64683000	36363000	28319000	39684000	20675000	19009000
HIS4	1	10	10	10	9	9	7	7	0	0	1	0	87.72	799	0.97014	0.92901	0.87595	0.79435	NaN	NaN	NaN	NaN	10907000000	6295000000	4612000000	3733500000	2215500000	1518000000	3169000000	1708800000	1460200000	2752300000	1637400000	1114800000	1243700000	727830000	515870000	0	0	0	0	0	0	8547900	5436200	3111700	0	0	0
TRP2	1	14	14	14	12	9	9	9	1	0	3	1	56.767	507	0.96778	1.0109	1.002	1.0261	NaN	NaN	1.0365	0.84124	53797000000	29899000000	23898000000	24829000000	14258000000	10570000000	10477000000	5631000000	4846000000	8521900000	4670900000	3851000000	9832900000	5259000000	4573900000	4034100	3532800	501300	0	0	0	76838000	42315000	34523000	55899000	33819000	22080000
TRP3	1	12	12	12	10	7	7	6	0	0	0	1	53.489	484	1.0065	1.0342	1.0961	1.1016	NaN	NaN	NaN	NaN	18301000000	10019000000	8282000000	6712400000	3755100000	2957300000	4223500000	2321300000	1902200000	4339400000	2339300000	2000100000	3019600000	1599900000	1419700000	0	0	0	0	0	0	0	0	0	5809800	3096700	2713100
MES1	1	17	17	17	11	9	9	8	1	4	9	5	85.677	751	0.95576	1.0439	0.99441	0.98095	NaN	0.88481	0.96486	1.2017	34155000000	18878000000	15278000000	9672900000	5388900000	4284000000	8117700000	4357000000	3760700000	8530500000	4637700000	3892800000	7214300000	4124500000	3089800000	28645000	20021000	8624900	39017000	27604000	11413000	389860000	224230000	165640000	162150000	97661000	64489000
INH1	1	1	1	1	1	0	0	0	0	0	0	0	9.87	85	NaN	NaN	NaN	NaN	NaN	NaN	NaN	NaN	1122100000	588350000	533750000	1122100000	588350000	533750000	0	0	0	0	0	0	0	0	0	0	0	0	0	0	0	0	0	0	0	0	0
HTB2	1	9	2	2	5	4	3	3	4	4	5	5	14.237	131	NaN	NaN	NaN	NaN	NaN	NaN	NaN	NaN	88015000	45272000	42743000	77031000	38865000	38166000	2009100	1145400	863740	3759600	2247200	1512400	5215400	3014400	2201000	0	0	0	0	0	0	0	0	0	0	0	0
TUB2	1	1	1	1	0	0	0	0	0	0	1	1	50.922	457	NaN	NaN	NaN	NaN	NaN	NaN	NaN	NaN	107040000	67159000	39877000	0	0	0	0	0	0	0	0	0	0	0	0	0	0	0	0	0	0	54758000	35745000	19013000	52279000	31414000	20864000
REP2	1	3	3	3	0	0	0	0	0	0	1	2	33.196	296	NaN	NaN	NaN	NaN	NaN	NaN	NaN	0.58717	44893000	30097000	14796000	0	0	0	0	0	0	0	0	0	0	0	0	0	0	0	0	0	0	10333000	5990000	4343000	34560000	24107000	10453000
CBP2	1	5	5	5	1	0	0	0	1	4	3	2	73.86	630	NaN	NaN	NaN	NaN	NaN	1.0107	0.89786	NaN	304650000	226330000	78327000	0	0	0	0	0	0	0	0	0	0	0	0	47717000	40011000	7705900	83163000	59601000	23562000	150300000	111010000	39292000	23472000	15706000	7765800
aI1	1	4	4	4	1	1	2	0	0	2	0	2	96.078	834	NaN	NaN	1.3663	NaN	NaN	3.0208	NaN	2.6163	1383300000	665140000	718200000	359610000	204790000	154820000	0	0	0	522060000	207140000	314920000	0	0	0	0	0	0	115450000	62421000	53028000	0	0	0	386220000	190780000	195430000
CPA2	1	17	16	16	15	8	7	8	1	1	3	2	123.91	1118	0.9985	0.8983	1.0861	1.0499	NaN	1.0242	1.02	1.0647	26722000000	13523000000	13199000000	9422600000	4922700000	4499900000	7224700000	4040000000	3184700000	4762800000	2081100000	2681700000	4144800000	1823800000	2321000000	56671000	41924000	14747000	137230000	81610000	55620000	173510000	101300000	72212000	799600000	430370000	369230000
COX4	1	4	4	4	3	4	3	2	0	1	0	0	17.142	155	1.198	0.8583	0.97524	NaN	NaN	NaN	NaN	NaN	4989400000	2717000000	2272300000	1904100000	1004600000	899510000	1433300000	761060000	672200000	998650000	562780000	435870000	608080000	370380000	237700000	0	0	0	45310000	18256000	27054000	0	0	0	0	0	0
COX8	1	1	1	1	1	1	0	1	0	1	0	0	8.9066	78	NaN	NaN	NaN	NaN	NaN	NaN	NaN	NaN	723480000	327130000	396350000	236080000	104710000	131370000	284900000	113000000	171900000	0	0	0	164570000	88936000	75634000	0	0	0	37929000	20482000	17447000	0	0	0	0	0	0
ADE4	1	8	8	8	5	5	4	4	0	0	0	2	56.719	510	0.90968	0.92732	1.0443	0.88204	NaN	NaN	NaN	NaN	6927500000	3955700000	2971800000	2356400000	1405700000	950760000	1853200000	1014800000	838410000	1773600000	1006400000	767140000	928600000	516350000	412250000	0	0	0	0	0	0	0	0	0	15724000	12485000	3239000
RPO31	1	11	11	11	6	4	3	3	1	2	0	2	162.3	1460	0.99095	1.0446	1.0116	1.0786	NaN	1.1464	NaN	0.71365	2099300000	1157100000	942150000	579830000	331140000	248690000	574440000	307170000	267270000	492910000	259620000	233300000	415570000	237870000	177700000	3636800	2387600	1249200	14512000	8909100	5603200	0	0	0	18369000	10042000	8327500
ADE8	1	4	4	4	2	3	2	3	0	0	0	0	23.54	214	0.72476	1.0916	0.75535	1.0147	NaN	NaN	NaN	NaN	4964300000	2744800000	2219400000	865540000	493000000	372540000	1282300000	759180000	523130000	1370300000	761340000	609010000	1446100000	731290000	714770000	0	0	0	0	0	0	0	0	0	0	0	0
RPL39	1	2	2	2	0	0	0	0	1	0	2	2	6.3415	51	NaN	NaN	NaN	NaN	NaN	NaN	1.0233	0.962	3271700000	1973400000	1298300000	0	0	0	0	0	0	0	0	0	0	0	0	30983000	19181000	11802000	0	0	0	2564600000	1562500000	1002100000	676110000	391660000	284440000
TOP1	1	12	12	12	2	4	1	2	0	5	3	4	89.994	769	NaN	1.0051	NaN	0.90692	NaN	1.6934	1.1394	0.8878	1486600000	828670000	657890000	323280000	169580000	153710000	471380000	251700000	219680000	120080000	77963000	42121000	203170000	112350000	90816000	0	0	0	80538000	36697000	43841000	77664000	49707000	27957000	210440000	130670000	79765000
CDC9	1	7	7	7	0	1	1	1	1	3	2	3	84.827	755	NaN	NaN	NaN	NaN	NaN	0.98561	0.99812	0.88648	472650000	272950000	199700000	0	0	0	0	0	0	141020000	71102000	69922000	55429000	37786000	17642000	6769500	3240000	3529500	46746000	26839000	19907000	89741000	57825000	31916000	132940000	76161000	56780000
ARG3	1	1	1	1	1	1	0	0	0	0	0	0	37.845	338	NaN	NaN	NaN	NaN	NaN	NaN	NaN	NaN	269440000	129790000	139640000	269440000	129790000	139640000	0	0	0	0	0	0	0	0	0	0	0	0	0	0	0	0	0	0	0	0	0
RPP1A	1	3	3	3	3	3	2	2	0	1	2	2	10.908	106	0.99618	1.0068	1.1463	1.3276	NaN	NaN	1.1013	1.0383	7016600000	3890300000	3126300000	2422500000	1402600000	1020000000	1479200000	790050000	689150000	791300000	434470000	356830000	1565300000	832960000	732330000	0	0	0	2294100	1501700	792450	214250000	122370000	91881000	541710000	306390000	235320000
RPP2A	1	5	5	5	5	5	5	5	1	0	1	0	10.746	106	0.96496	1.0085	0.98697	0.97859	NaN	NaN	NaN	NaN	212140000000	116040000000	96108000000	58107000000	33133000000	24974000000	54308000000	28233000000	26075000000	45534000000	24641000000	20893000000	53846000000	29993000000	23852000000	19287000	10874000	8413000	0	0	0	331110000	25951000	305160000	0	0	0
HEM2	1	2	2	2	1	0	0	1	0	0	1	0	37.74	342	NaN	NaN	NaN	NaN	NaN	NaN	NaN	NaN	743220000	101040000	642180000	713610000	84608000	629010000	0	0	0	0	0	0	11339000	5284700	6054500	0	0	0	0	0	0	18270000	11148000	7121700	0	0	0
OPI3	1	1	1	1	0	0	0	0	1	0	1	1	23.15	206	NaN	NaN	NaN	NaN	NaN	NaN	1.2549	NaN	90072000	53380000	36693000	0	0	0	0	0	0	0	0	0	0	0	0	0	0	0	0	0	0	49635000	29251000	20384000	40437000	24128000	16309000
RPL33A	1	5	1	1	4	3	4	3	4	5	4	4	12.154	107	1.0436	NaN	NaN	NaN	NaN	NaN	NaN	NaN	7881700000	4526300000	3355300000	2339500000	1387400000	952080000	2161900000	1230800000	931130000	1337400000	754710000	582670000	1215200000	677980000	537210000	93121000	59547000	33574000	90520000	51546000	38974000	335210000	204890000	130330000	308820000	159460000	149360000
RPL29	1	6	6	6	3	5	5	6	1	0	0	0	6.6687	59	0.93834	0.93627	0.96059	0.94688	NaN	NaN	NaN	NaN	10327000000	5992100000	4334600000	2400600000	1415000000	985570000	2776600000	1596900000	1179700000	2340000000	1352700000	987290000	2807900000	1626400000	1181500000	1533300	1028100	505260	0	0	0	0	0	0	0	0	0
RPS9B	1	11	1	1	5	5	6	6	6	8	9	9	22.298	195	NaN	NaN	NaN	NaN	NaN	NaN	NaN	NaN	0	0	0	0	0	0	0	0	0	0	0	0	0	0	0	0	0	0	0	0	0	0	0	0	0	0	0
TPK3;TPK1;TPK2	3	4	4	4	2	2	1	0	0	0	0	0	45.977	398	0.90584	NaN	NaN	NaN	NaN	NaN	NaN	NaN	471910000	246210000	225700000	225080000	120400000	104680000	103560000	48568000	54995000	143270000	77244000	66024000	0	0	0	0	0	0	0	0	0	0	0	0	0	0	0
CDC36	1	2	2	2	2	1	0	1	0	0	1	1	22.362	191	1.059	NaN	NaN	NaN	NaN	NaN	NaN	NaN	399660000	224200000	175470000	329060000	184240000	144810000	23012000	10913000	12098000	0	0	0	0	0	0	0	0	0	0	0	0	22914000	14830000	8083800	24682000	14208000	10474000
CDC37	1	14	14	14	13	7	6	5	0	0	0	0	58.384	506	1.0221	0.90683	1.046	1.19	NaN	NaN	NaN	NaN	13720000000	7094500000	6625500000	6977000000	3475100000	3501900000	2823600000	1540600000	1283000000	2825600000	1537100000	1288500000	1093800000	541650000	552200000	0	0	0	0	0	0	0	0	0	0	0	0
NOT3	1	13	13	13	6	6	8	6	1	0	6	2	94.402	836	0.88935	0.84842	0.66637	0.65026	NaN	NaN	0.86797	0.80076	4102700000	2443400000	1659300000	934690000	538390000	396300000	935130000	560400000	374730000	1210700000	742030000	468630000	908640000	535420000	373220000	5094400	2808200	2286300	0	0	0	65132000	38774000	26358000	43336000	25527000	17810000
HEM4	1	3	3	3	1	1	0	0	0	0	1	0	30.911	275	NaN	NaN	NaN	NaN	NaN	NaN	NaN	NaN	196430000	115980000	80445000	66663000	38687000	27976000	106330000	60380000	45948000	0	0	0	0	0	0	0	0	0	0	0	0	23436000	16915000	6520800	0	0	0
CYC3	1	5	5	5	2	2	2	1	1	1	2	3	30.081	269	1.1862	0.93418	NaN	0.84699	NaN	NaN	NaN	1.0117	2397400000	1307500000	1089900000	875030000	464910000	410120000	802060000	435260000	366800000	21676000	9677500	11999000	353140000	199910000	153230000	0	0	0	16483000	7701600	8781600	122600000	76333000	46270000	206420000	113750000	92671000
SIR2	1	5	5	5	1	1	1	1	1	1	2	1	63.261	562	NaN	0.73433	NaN	NaN	NaN	NaN	0.82128	NaN	2884500000	1643300000	1241200000	121950000	77528000	44425000	129200000	81483000	47721000	131320000	66752000	64566000	108920000	60628000	48293000	170610000	114450000	56161000	261970000	151710000	110260000	1027700000	601650000	426020000	932880000	489150000	443740000
SIR3	1	4	4	4	0	0	0	2	0	0	1	1	111.36	978	NaN	NaN	NaN	0.57812	NaN	NaN	NaN	NaN	281800000	183110000	98697000	0	0	0	0	0	0	0	0	0	268020000	175770000	92255000	0	0	0	0	0	0	11169000	6129900	5038700	2613200	1210300	1402900
CDC31	1	1	1	1	1	1	0	0	0	0	0	0	18.751	161	NaN	NaN	NaN	NaN	NaN	NaN	NaN	NaN	148080000	74819000	73265000	77164000	46482000	30682000	70920000	28338000	42583000	0	0	0	0	0	0	0	0	0	0	0	0	0	0	0	0	0	0
GPH1	1	3	3	3	3	1	0	0	0	0	0	0	103.27	902	1.5152	NaN	NaN	NaN	NaN	NaN	NaN	NaN	1505600000	832260000	673360000	1245900000	676440000	569470000	259720000	155830000	103890000	0	0	0	0	0	0	0	0	0	0	0	0	0	0	0	0	0	0
DCD1	1	2	2	2	0	1	0	0	0	0	1	1	35.646	312	NaN	NaN	NaN	NaN	NaN	NaN	NaN	NaN	60408000	37506000	22902000	0	0	0	26607000	18101000	8505800	0	0	0	0	0	0	0	0	0	0	0	0	17173000	9427500	7745300	16628000	9977600	6650700
PDE2	1	3	3	3	2	1	1	1	0	1	1	0	60.999	526	1.0431	NaN	NaN	NaN	NaN	NaN	NaN	NaN	975390000	558250000	417140000	317660000	186110000	131550000	301670000	168810000	132860000	226680000	133770000	92914000	126010000	66993000	59014000	0	0	0	590300	449870	140430	2778100	2118800	659310	0	0	0
RAD52	1	2	2	2	0	1	2	1	0	0	0	0	52.403	471	NaN	NaN	0.82916	NaN	NaN	NaN	NaN	NaN	298240000	183800000	114440000	0	0	0	59455000	38343000	21113000	170550000	103070000	67480000	68235000	42385000	25851000	0	0	0	0	0	0	0	0	0	0	0	0
STE7	1	3	3	3	1	0	0	1	0	0	1	0	57.708	515	NaN	NaN	NaN	NaN	NaN	NaN	NaN	NaN	22825000	13781000	9043500	12957000	8710700	4245800	0	0	0	0	0	0	0	0	0	0	0	0	0	0	0	9868400	5070700	4797700	0	0	0
CDC21	1	4	4	4	2	2	2	1	0	0	1	1	35.047	304	1.0745	1.0963	1.0923	NaN	NaN	NaN	NaN	NaN	1703000000	920810000	782190000	643150000	348140000	295010000	610750000	340370000	270380000	405660000	207730000	197920000	33677000	20402000	13275000	0	0	0	0	0	0	3870500	755450	3115000	5896800	3405300	2491500
TOP2	1	14	14	14	4	7	4	2	0	5	0	1	164.21	1428	1.1807	0.97495	1.1252	NaN	NaN	1.9751	NaN	NaN	2018700000	1016400000	1002300000	474100000	207540000	266560000	1013500000	566440000	447030000	430750000	194590000	236160000	47805000	24500000	23306000	0	0	0	52547000	23289000	29258000	0	0	0	0	0	0
CMD1	1	5	5	5	4	4	4	5	0	0	0	0	16.135	147	1.0102	1.0666	1.0534	1.0818	NaN	NaN	NaN	NaN	40467000000	22010000000	18457000000	9492700000	5332900000	4159800000	11515000000	6151600000	5363700000	10437000000	5645000000	4791700000	9021800000	4880500000	4141400000	0	0	0	0	0	0	0	0	0	0	0	0
RAD3	1	3	3	3	0	0	2	1	0	1	0	0	89.785	778	NaN	NaN	1.0894	NaN	NaN	NaN	NaN	NaN	235070000	111780000	123290000	0	0	0	0	0	0	124040000	57977000	66068000	111030000	53803000	57224000	0	0	0	0	0	0	0	0	0	0	0	0
SPT2	1	2	2	2	1	1	0	1	0	0	0	0	38.551	333	NaN	NaN	NaN	NaN	NaN	NaN	NaN	NaN	111270000	57803000	53472000	49227000	24870000	24357000	21747000	13184000	8563300	0	0	0	40301000	19749000	20552000	0	0	0	0	0	0	0	0	0	0	0	0
MST1	1	6	6	6	0	0	1	1	1	3	2	3	54.091	462	NaN	NaN	NaN	NaN	NaN	1.0341	1.1249	0.83145	271970000	162870000	109100000	0	0	0	0	0	0	119430000	73569000	45860000	75798000	43707000	32091000	0	0	0	19624000	12746000	6877600	35394000	19689000	15704000	21728000	13156000	8572200
ADE5,7	1	9	9	9	4	5	5	5	1	1	3	2	86.067	802	0.91172	0.95374	0.98109	0.95268	NaN	NaN	0.88619	0.62669	9301900000	5162400000	4139500000	2366400000	1295900000	1070500000	1860300000	1064400000	795950000	2559100000	1477900000	1081300000	2169100000	1113900000	1055200000	1405700	1128100	277580	178780000	106740000	72043000	54109000	36448000	17661000	112570000	65965000	46606000
ADR1	1	7	7	7	4	3	1	2	1	0	0	0	150.94	1323	0.91888	1.0692	NaN	1.7249	NaN	NaN	NaN	NaN	562830000	288960000	273870000	314620000	186090000	128530000	126180000	61811000	64364000	38051000	18935000	19116000	65794000	18064000	47730000	18190000	4060000	14130000	0	0	0	0	0	0	0	0	0
ARG82	1	4	4	4	2	4	1	1	0	0	0	0	40.353	355	1.1446	1.0283	NaN	NaN	NaN	NaN	NaN	NaN	917460000	512080000	405380000	529630000	308820000	220810000	226110000	108960000	117160000	150300000	89077000	61221000	11424000	5229200	6194400	0	0	0	0	0	0	0	0	0	0	0	0
COX9	1	1	1	1	1	0	0	0	1	1	1	1	6.9631	59	NaN	NaN	NaN	NaN	NaN	NaN	0.861	NaN	211690000	124500000	87188000	69900000	41003000	28898000	0	0	0	0	0	0	0	0	0	12034000	8584500	3449900	15819000	7396000	8422700	79295000	48164000	31131000	34637000	19350000	15287000
CPA1	1	3	3	3	3	2	2	0	0	0	0	0	45.361	411	0.92404	0.98963	1.1639	NaN	NaN	NaN	NaN	NaN	2501000000	1359200000	1141800000	1542100000	831830000	710300000	594140000	346320000	247820000	364720000	181020000	183700000	0	0	0	0	0	0	0	0	0	0	0	0	0	0	0
GCR1	1	2	2	2	0	1	1	1	1	1	1	0	87.728	785	NaN	NaN	NaN	NaN	NaN	NaN	NaN	NaN	337280000	190600000	146680000	0	0	0	120990000	78676000	42311000	109930000	44791000	65135000	73823000	44012000	29811000	16787000	12888000	3899400	15758000	10233000	5524700	0	0	0	0	0	0
LEU1	1	8	8	8	5	6	6	5	0	0	0	0	85.793	779	1.0177	0.98	0.97132	1.0465	NaN	NaN	NaN	NaN	6613800000	3522300000	3091500000	2099200000	1105200000	994060000	2000100000	1067500000	932600000	1577800000	875480000	702320000	936740000	474180000	462550000	0	0	0	0	0	0	0	0	0	0	0	0
MRS1	1	4	4	4	1	0	0	0	1	2	2	3	41.289	363	NaN	NaN	NaN	NaN	NaN	1.0111	0.72245	0.92056	183160000	114420000	68744000	5638800	3520700	2118200	0	0	0	0	0	0	0	0	0	24637000	17909000	6727700	51788000	32869000	18918000	34508000	22260000	12248000	66588000	37856000	28733000
PHO2	1	2	2	2	2	1	0	0	0	0	0	0	63.39	559	NaN	NaN	NaN	NaN	NaN	NaN	NaN	NaN	157630000	75340000	82294000	157630000	75340000	82294000	0	0	0	0	0	0	0	0	0	0	0	0	0	0	0	0	0	0	0	0	0
PHO4	1	1	1	1	0	0	0	0	0	0	0	1	34.088	312	NaN	NaN	NaN	NaN	NaN	NaN	NaN	NaN	0	0	0	0	0	0	0	0	0	0	0	0	0	0	0	0	0	0	0	0	0	0	0	0	0	0	0
PIF1	1	3	3	3	1	0	0	2	0	0	0	0	97.681	859	NaN	NaN	NaN	NaN	NaN	NaN	NaN	NaN	13906000	8224600	5681100	0	0	0	0	0	0	0	0	0	13906000	8224600	5681100	0	0	0	0	0	0	0	0	0	0	0	0
PFY1	1	4	4	4	3	4	4	4	1	0	1	1	13.677	126	0.92178	1.0999	0.81703	1.1108	NaN	NaN	NaN	NaN	15666000000	8743800000	6922500000	4719900000	2827600000	1892300000	3543300000	1936100000	1607100000	4329300000	2358600000	1970700000	3070100000	1618600000	1451500000	3781200	2882100	899190	0	0	0	0	0	0	0	0	0
ERG12	1	4	4	4	4	3	3	3	0	0	0	0	48.459	443	0.96085	0.94194	0.92814	0.60889	NaN	NaN	NaN	NaN	2452500000	1396400000	1056100000	1265000000	747080000	517900000	320860000	183030000	137830000	572020000	287400000	284620000	294660000	178910000	115750000	0	0	0	0	0	0	0	0	0	0	0	0
TRP4	1	4	4	4	4	3	3	4	0	0	0	0	41.374	380	0.9144	0.97967	0.89599	0.96116	NaN	NaN	NaN	NaN	3703600000	2132700000	1570900000	1355100000	762040000	593050000	1191300000	735350000	455900000	494170000	276380000	217790000	663110000	358940000	304160000	0	0	0	0	0	0	0	0	0	0	0	0
ARD1	1	8	8	8	6	3	4	5	1	0	4	2	27.603	238	0.91097	1.0134	0.98912	1.0588	NaN	NaN	1.1421	0.92149	4921600000	2644100000	2277500000	1054800000	626640000	428200000	661600000	356570000	305030000	1333800000	657080000	676740000	1476700000	777480000	699210000	7552400	4997400	2555000	0	0	0	314770000	178950000	135820000	72328000	42349000	29979000
DFR1	1	3	3	3	3	1	1	1	0	0	0	0	24.261	211	1.0119	0.94419	NaN	NaN	NaN	NaN	NaN	NaN	683140000	367120000	316020000	240490000	123290000	117200000	248630000	135680000	112950000	107990000	58877000	49117000	86023000	49268000	36755000	0	0	0	0	0	0	0	0	0	0	0	0
MOD5	1	1	1	1	1	1	0	0	0	0	0	0	50.236	428	NaN	NaN	NaN	NaN	NaN	NaN	NaN	NaN	128820000	63372000	65449000	53174000	25955000	27219000	75646000	37416000	38230000	0	0	0	0	0	0	0	0	0	0	0	0	0	0	0	0	0	0
PBS2	1	8	8	8	4	6	4	3	0	0	1	0	72.719	668	1.0061	0.9854	0.92815	0.96862	NaN	NaN	NaN	NaN	2244700000	1249400000	995300000	864580000	498910000	365670000	504220000	261980000	242250000	511430000	283970000	227460000	355160000	198020000	157140000	0	0	0	0	0	0	9350700	6569600	2781100	0	0	0
SPE1	1	5	5	5	3	1	0	0	0	0	1	1	52.285	466	1.008	NaN	NaN	NaN	NaN	NaN	NaN	NaN	663050000	379510000	283540000	520770000	282160000	238610000	111830000	80319000	31512000	0	0	0	0	0	0	0	0	0	0	0	0	15528000	3019000	12509000	14921000	14012000	909020
CHO1	1	2	2	2	0	0	0	1	0	0	1	1	30.804	276	NaN	NaN	NaN	NaN	NaN	NaN	NaN	NaN	119070000	62298000	56768000	0	0	0	0	0	0	0	0	0	31263000	17400000	13863000	0	0	0	0	0	0	32511000	15776000	16736000	55291000	29122000	26169000
MET2	1	2	2	2	1	1	1	1	0	0	0	0	53.659	486	NaN	NaN	NaN	NaN	NaN	NaN	NaN	NaN	253630000	126450000	127180000	0	0	0	77316000	40154000	37162000	75819000	35696000	40123000	100490000	50599000	49891000	0	0	0	0	0	0	0	0	0	0	0	0
QCR8	1	2	2	2	2	2	2	2	1	1	1	1	10.974	94	NaN	NaN	1.0356	NaN	NaN	NaN	NaN	NaN	373530000	198340000	175190000	90407000	51088000	39319000	89357000	49546000	39811000	129960000	67336000	62626000	63802000	30365000	33436000	0	0	0	0	0	0	0	0	0	0	0	0
MSS18	1	1	1	1	0	0	0	0	0	0	1	1	30.957	268	NaN	NaN	NaN	NaN	NaN	NaN	NaN	NaN	41552000	20367000	21185000	0	0	0	0	0	0	0	0	0	0	0	0	0	0	0	0	0	0	16285000	6558400	9727100	25267000	13808000	11458000
CYR1	1	7	7	7	2	2	3	4	0	0	2	2	227.83	2026	1.0726	1.1746	1.0766	0.8992	NaN	NaN	0.53199	0.91994	1082100000	584330000	497780000	214490000	116860000	97638000	156640000	86755000	69889000	243260000	118940000	124320000	363670000	191000000	172670000	0	0	0	0	0	0	64306000	47677000	16629000	39740000	23099000	16641000
GCD1	1	9	9	9	6	5	3	5	0	0	1	1	65.699	578	1.009	0.71672	0.67242	1.0372	NaN	NaN	NaN	NaN	4846100000	2899100000	1947000000	2676000000	1472300000	1203700000	1478400000	990100000	488260000	188800000	118560000	70238000	476310000	301650000	174660000	0	0	0	0	0	0	13990000	8148900	5841300	12638000	8336500	4301200
SWI1	1	2	2	2	1	0	1	1	0	0	0	1	147.94	1314	NaN	NaN	NaN	NaN	NaN	NaN	NaN	NaN	123020000	60661000	62355000	0	0	0	0	0	0	53137000	24790000	28346000	43671000	21267000	22404000	0	0	0	0	0	0	0	0	0	26208000	14604000	11604000
TUB1	1	8	8	7	4	3	3	3	1	1	5	3	49.799	447	1.0559	1.0825	0.92546	1.3213	NaN	NaN	0.84448	0.89267	6860700000	3696900000	3163800000	4240400000	2326400000	1913900000	1100900000	540960000	559980000	656550000	362140000	294410000	392920000	166850000	226080000	32141000	24390000	7751500	29255000	29255000	0	329460000	200280000	129170000	79071000	46584000	32486000
TUB3	1	5	4	4	3	1	1	1	0	0	2	1	49.693	445	1.0363	NaN	NaN	NaN	NaN	NaN	NaN	NaN	851280000	437420000	413850000	813700000	410710000	402990000	0	0	0	0	0	0	0	0	0	0	0	0	0	0	0	31168000	21918000	9249600	6414400	4796400	1618000
CDC16	1	2	2	2	0	0	1	0	0	0	1	1	94.991	840	NaN	NaN	NaN	NaN	NaN	NaN	NaN	NaN	41774000	19589000	22185000	0	0	0	0	0	0	31618000	14154000	17464000	0	0	0	0	0	0	0	0	0	8117900	4138100	3979800	2038300	1296500	741840
TRL1	1	7	7	7	2	1	3	1	1	0	0	0	95.336	827	1.2028	NaN	1.2195	NaN	NaN	NaN	NaN	NaN	2547800000	942270000	1605500000	1217100000	666920000	550200000	230830000	123070000	107770000	998060000	97381000	900680000	101800000	54909000	46895000	0	0	0	0	0	0	0	0	0	0	0	0
SWI6	1	4	4	4	2	1	2	2	1	1	1	1	90.559	803	1.069	NaN	0.74915	0.86396	NaN	NaN	NaN	NaN	1184300000	645310000	539020000	515180000	288540000	226640000	180860000	101990000	78874000	255320000	144530000	110790000	179420000	77950000	101470000	7067800	5052900	2014900	9965300	6433100	3532200	15892000	9881800	6010200	20615000	10938000	9677900
RPS25B	1	8	1	1	5	5	5	5	5	5	4	5	12.009	108	NaN	NaN	NaN	NaN	NaN	NaN	NaN	NaN	0	0	0	0	0	0	0	0	0	0	0	0	0	0	0	0	0	0	0	0	0	0	0	0	0	0	0
RPS28B;RPS28A	2	2	2	2	1	1	0	1	0	1	1	1	7.5647	67	NaN	NaN	NaN	NaN	NaN	NaN	NaN	NaN	436550000	143270000	293280000	104720000	52143000	52575000	264750000	59898000	204850000	0	0	0	67089000	31230000	35859000	0	0	0	0	0	0	0	0	0	0	0	0
RPL31B	1	12	1	1	5	4	4	5	6	6	7	8	12.967	113	NaN	NaN	NaN	NaN	NaN	NaN	NaN	NaN	0	0	0	0	0	0	0	0	0	0	0	0	0	0	0	0	0	0	0	0	0	0	0	0	0	0	0
TY1B-PL;TY1B-LR2	2	46	1	0	30	28	26	23	20	13	22	26	198.57	1755	NaN	NaN	NaN	NaN	NaN	NaN	NaN	NaN	246390000	94570000	151820000	158530000	69433000	89102000	0	0	0	87851000	25138000	62713000	0	0	0	0	0	0	0	0	0	0	0	0	0	0	0
TY1B-PR1	1	49	2	0	31	30	26	22	23	15	24	28	198.57	1755	NaN	NaN	NaN	NaN	NaN	NaN	NaN	NaN	156890000	94074000	62814000	64432000	41033000	23399000	61006000	28011000	32995000	0	0	0	0	0	0	0	0	0	0	0	0	0	0	0	31451000	25030000	6420800
TY1B-PR2;TY1B-ML1;TY1B-DR5	3	46	1	0	31	29	26	21	21	13	22	25	198.64	1756	NaN	0.76894	0.45786	0.71827	NaN	NaN	NaN	NaN	1525800000	900210000	625560000	478210000	240170000	238040000	486860000	281300000	205560000	140310000	114930000	25380000	101390000	75243000	26151000	49963000	33844000	16119000	10682000	6480200	4201400	125840000	71555000	54285000	132510000	76678000	55831000
TY2A-GR1	1	10	1	1	3	3	3	3	6	5	6	5	49.772	438	NaN	NaN	NaN	NaN	NaN	NaN	NaN	NaN	0	0	0	0	0	0	0	0	0	0	0	0	0	0	0	0	0	0	0	0	0	0	0	0	0	0	0
YGL041W-A	1	2	2	2	1	0	0	0	0	1	2	1	18.103	154	1.0569	NaN	NaN	NaN	NaN	1.2469	0.98821	NaN	224670000	132850000	91820000	32927000	18745000	14182000	0	0	0	0	0	0	0	0	0	0	0	0	5959100	3484000	2475100	74340000	46344000	27996000	111440000	64273000	47166000
HAP1	1	1	1	1	0	0	0	1	0	0	0	0	166.11	1502	NaN	NaN	NaN	NaN	NaN	NaN	NaN	NaN	17593000	17593000	0	0	0	0	0	0	0	0	0	0	17593000	17593000	0	0	0	0	0	0	0	0	0	0	0	0	0
PBI2	1	4	4	4	3	2	2	3	0	0	0	0	8.5897	75	1.0939	1.1651	1.2639	1.1904	NaN	NaN	NaN	NaN	11824000000	6152800000	5671200000	4475200000	2445200000	2029900000	3016600000	1554900000	1461800000	2610600000	1268100000	1342600000	1721600000	884690000	836950000	0	0	0	0	0	0	0	0	0	0	0	0
COS3;COS2	2	3	1	1	0	1	0	0	2	2	1	0	45.165	379	NaN	NaN	NaN	NaN	NaN	NaN	NaN	NaN	13457000	6116600	7340300	0	0	0	0	0	0	0	0	0	0	0	0	0	0	0	1238400	769290	469080	12219000	5347300	6871300	0	0	0
RPS30B;RPS30A	2	6	6	6	4	5	2	4	1	0	2	2	7.1184	63	0.94585	1.0361	0.92837	0.87437	NaN	NaN	NaN	1.0698	7679900000	4468000000	3211900000	1934300000	1131500000	802780000	3125200000	1812000000	1313200000	1628600000	949590000	679030000	691740000	402200000	289540000	0	0	0	0	0	0	168740000	97070000	71673000	131360000	75721000	55634000
TY2B-GR1;TY2B-GR2;TY2B-F;TY2B-LR1;TY2B-OR2;TY2B-DR2;TY2B-LR2	7	23	1	1	7	7	7	5	11	6	9	12	202.12	1770	NaN	NaN	NaN	NaN	NaN	NaN	NaN	NaN	30282000	17730000	12551000	30282000	17730000	12551000	0	0	0	0	0	0	0	0	0	0	0	0	0	0	0	0	0	0	0	0	0
TY1A-PL;TY1A-LR2;TY1A-ER1;TY1A-DR6;TY1A-PR3;TY1A-LR4;TY1A-OL	8	16	2	0	12	11	10	8	11	10	10	10	48.953	440	0.91711	NaN	NaN	NaN	NaN	NaN	NaN	NaN	697470000	361260000	336210000	697470000	361260000	336210000	0	0	0	0	0	0	0	0	0	0	0	0	0	0	0	0	0	0	0	0	0
HMLALPHA2;MATALPHA2	3	3	3	3	0	1	1	0	0	0	0	1	24.282	210	NaN	NaN	NaN	NaN	NaN	NaN	NaN	NaN	115660000	84692000	30967000	0	0	0	108920000	80188000	28732000	0	0	0	0	0	0	0	0	0	0	0	0	0	0	0	6739600	4504400	2235200
ADH4	1	2	2	2	2	1	1	1	0	0	0	0	41.142	382	NaN	NaN	NaN	NaN	NaN	NaN	NaN	NaN	472860000	221410000	251460000	126340000	53308000	73036000	116050000	41656000	74391000	129980000	77735000	52244000	100490000	48708000	51786000	0	0	0	0	0	0	0	0	0	0	0	0
MRS3	1	2	2	1	1	1	1	1	1	0	2	2	34.501	314	NaN	NaN	1.0688	NaN	NaN	NaN	0.89032	0.90903	659900000	392250000	267640000	123730000	78676000	45058000	111080000	68673000	42405000	207030000	105520000	101510000	136240000	92164000	44079000	7086700	4094000	2992600	0	0	0	36186000	21055000	15132000	38536000	22074000	16462000
RPP1B	1	2	2	2	2	2	2	1	1	1	1	1	10.667	106	0.94071	0.82959	0.93867	0.96414	NaN	NaN	NaN	NaN	69827000000	38803000000	31024000000	32569000000	18827000000	13743000000	15122000000	8119100000	7002900000	11966000000	6327500000	5638600000	9928900000	5395300000	4533500000	39308000	22464000	16845000	27295000	14838000	12457000	45177000	26759000	18418000	128920000	70076000	58845000
MRP2	1	2	2	2	1	0	0	0	0	0	2	0	13.538	115	NaN	NaN	NaN	NaN	NaN	NaN	0.97406	NaN	44912000	22822000	22090000	0	0	0	0	0	0	0	0	0	0	0	0	0	0	0	0	0	0	44912000	22822000	22090000	0	0	0
GPA2	1	1	1	1	0	0	0	1	0	0	0	0	50.447	449	NaN	NaN	NaN	NaN	NaN	NaN	NaN	NaN	90767000	45431000	45336000	0	0	0	0	0	0	0	0	0	90767000	45431000	45336000	0	0	0	0	0	0	0	0	0	0	0	0
PET54	1	4	4	4	1	1	1	1	0	0	2	3	34.637	293	NaN	NaN	NaN	NaN	NaN	NaN	0.89138	0.91776	54372000	34014000	20358000	0	0	0	0	0	0	0	0	0	0	0	0	0	0	0	0	0	0	27259000	17681000	9577600	27113000	16333000	10780000
HOM3	1	7	7	7	5	4	3	3	0	0	0	1	58.109	527	0.91525	0.95802	0.83161	1.0335	NaN	NaN	NaN	NaN	5057000000	2950900000	2106200000	1731300000	1014600000	716680000	1508100000	884390000	623730000	1109800000	645660000	464160000	625990000	337880000	288110000	0	0	0	0	0	0	0	0	0	81831000	68361000	13470000
HSF1	1	1	1	1	0	0	1	1	0	0	0	0	93.281	833	NaN	NaN	NaN	NaN	NaN	NaN	NaN	NaN	508570000	265060000	243510000	0	0	0	0	0	0	238170000	121320000	116850000	270400000	143740000	126660000	0	0	0	0	0	0	0	0	0	0	0	0
MAK16	1	6	6	6	4	4	3	3	1	2	4	4	35.695	306	0.97505	0.93807	0.93731	0.95858	NaN	1.0673	1.0472	0.79288	4241300000	2401600000	1839700000	1150500000	653550000	496910000	1113500000	624730000	488720000	949620000	549430000	400190000	817810000	449730000	368080000	19034000	9111700	9922300	12254000	7085200	5168400	111180000	66796000	44381000	67499000	41170000	26329000
SEC7	1	10	10	10	7	5	4	3	0	0	0	1	226.88	2009	1.1042	0.90126	0.89256	0.97893	NaN	NaN	NaN	NaN	3790700000	2249200000	1541500000	2301900000	1398000000	903920000	968260000	562920000	405350000	359760000	202460000	157300000	152070000	81638000	70431000	0	0	0	0	0	0	0	0	0	8750900	4242100	4508800
ARF2;ARF1	2	2	2	2	2	0	0	0	0	0	1	0	20.657	181	0.84332	NaN	NaN	NaN	NaN	NaN	NaN	NaN	235750000	154850000	80900000	229100000	150920000	78178000	0	0	0	0	0	0	0	0	0	0	0	0	0	0	0	6645800	3923900	2721900	0	0	0
PYC1	1	9	1	1	7	4	3	2	0	0	1	1	130.1	1178	NaN	NaN	NaN	NaN	NaN	NaN	NaN	NaN	135200000	72110000	63092000	135200000	72110000	63092000	0	0	0	0	0	0	0	0	0	0	0	0	0	0	0	0	0	0	0	0	0
HEM13	1	3	3	3	2	2	1	2	0	0	0	0	37.711	328	1.0465	0.91867	NaN	1.0388	NaN	NaN	NaN	NaN	731220000	416000000	315220000	246720000	130730000	116000000	157520000	94428000	63089000	99428000	66637000	32791000	227550000	124200000	103350000	0	0	0	0	0	0	0	0	0	0	0	0
ZWF1	1	13	13	13	8	6	5	4	1	2	6	5	57.521	505	1.0182	1.0804	1.0233	1.1635	NaN	0.51955	1.0193	0.83505	20044000000	10762000000	9282500000	7272800000	4014900000	3257800000	4354700000	2274100000	2080700000	4398200000	2375800000	2022400000	3644900000	1864600000	1780400000	10660000	7394000	3266300	41272000	30437000	10835000	246010000	150460000	95555000	75526000	43990000	31537000
CDC24	1	3	3	3	0	0	0	0	0	1	2	0	96.938	854	NaN	NaN	NaN	NaN	NaN	NaN	NaN	NaN	17387000	11963000	5423700	0	0	0	0	0	0	0	0	0	0	0	0	0	0	0	7647200	4312800	3334300	9739500	7650100	2089400	0	0	0
NHP6A	1	4	4	3	0	1	2	1	1	0	1	1	10.802	93	NaN	NaN	0.98829	NaN	NaN	NaN	NaN	NaN	114880000	69469000	45407000	0	0	0	1647000	943590	703360	8418800	4853900	3565000	3956700	2317400	1639300	8858900	7192300	1666600	0	0	0	30959000	18038000	12921000	61036000	36124000	24912000
BIK1	1	2	2	2	2	2	2	1	0	0	0	0	51.091	440	1.0425	1.0558	0.88709	NaN	NaN	NaN	NaN	NaN	1122300000	667600000	454700000	525160000	348970000	176200000	289810000	165490000	124320000	241360000	127310000	114050000	65968000	25840000	40129000	0	0	0	0	0	0	0	0	0	0	0	0
TAF13	1	2	2	2	0	2	1	1	0	0	0	0	19.132	167	NaN	0.81506	NaN	NaN	NaN	NaN	NaN	NaN	305860000	179940000	125920000	0	0	0	164740000	98940000	65802000	74632000	41881000	32752000	66481000	39119000	27361000	0	0	0	0	0	0	0	0	0	0	0	0
RAP1	1	8	8	8	7	5	6	6	1	1	1	1	92.412	827	0.91071	0.94889	0.99005	0.89853	NaN	NaN	NaN	NaN	5473500000	3096600000	2376900000	1387100000	771280000	615860000	1411700000	802260000	609420000	1533700000	874770000	658890000	1080000000	620710000	459280000	7625100	5649400	1975700	34502000	12750000	21752000	8551800	3841800	4710000	10346000	5360200	4985400
SST2	1	6	6	6	3	1	0	2	1	1	3	0	79.715	698	0.99314	NaN	NaN	0.89988	NaN	NaN	0.97643	NaN	770300000	431470000	338830000	516750000	288230000	228530000	0	0	0	0	0	0	186150000	102440000	83712000	9011700	5910500	3101200	6122900	4021600	2101300	52261000	30875000	21386000	0	0	0
PDR1	1	2	2	2	0	1	1	1	0	0	1	0	121.79	1068	NaN	NaN	NaN	NaN	NaN	NaN	NaN	NaN	450410000	266010000	184400000	0	0	0	81802000	52217000	29585000	102570000	55960000	46606000	80703000	44453000	36250000	0	0	0	0	0	0	185340000	113380000	71961000	0	0	0
TCP1	1	15	15	15	9	8	6	8	0	0	8	6	60.48	559	1.0046	0.96293	0.98507	0.9843	NaN	NaN	0.84584	0.93657	26808000000	15067000000	11741000000	10515000000	5958800000	4556700000	4970600000	2681700000	2289000000	5524700000	3103600000	2421100000	5182800000	2955700000	2227100000	0	0	0	0	0	0	239920000	145070000	94852000	374590000	222290000	152300000
RAD50	1	6	6	6	4	1	3	1	0	0	0	0	152.57	1312	0.99627	NaN	1.1413	NaN	NaN	NaN	NaN	NaN	262710000	148630000	114090000	76252000	44268000	31984000	62850000	38394000	24456000	123610000	65966000	57647000	0	0	0	0	0	0	0	0	0	0	0	0	0	0	0
GCD2	1	3	3	3	2	2	2	2	1	1	1	1	70.851	651	0.85726	0.71742	0.86104	0.89614	NaN	NaN	NaN	NaN	1508700000	877220000	631480000	480310000	277800000	202510000	344540000	194220000	150320000	344490000	208220000	136280000	294960000	168930000	126020000	3708900	3009300	699600	3482200	2814200	668050	15259000	8842800	6416700	21956000	13387000	8569000
SNF4	1	7	7	7	2	1	0	0	0	0	5	5	36.401	322	0.9845	NaN	NaN	NaN	NaN	NaN	1.0056	1.0237	672330000	379460000	292870000	344830000	179300000	165530000	160770000	97963000	62804000	0	0	0	0	0	0	0	0	0	0	0	0	87287000	55120000	32166000	79446000	47082000	32365000
CAF20	1	5	5	5	5	5	4	4	1	0	1	1	18.223	161	0.97496	0.74067	0.99968	0.77847	NaN	NaN	NaN	NaN	11226000000	6478100000	4747900000	4510500000	2515500000	1995000000	2599200000	1480300000	1118900000	1930000000	1158800000	771170000	2083000000	1263700000	819250000	15260000	8641400	6618500	0	0	0	56775000	34358000	22417000	31230000	16740000	14490000
KIN1	1	6	6	6	3	1	2	1	0	0	1	1	120.07	1064	1.0176	NaN	NaN	NaN	NaN	NaN	NaN	NaN	33318000000	18569000000	14749000000	32788000000	18251000000	14538000000	73923000	28653000	45270000	81188000	49917000	31271000	87639000	50814000	36825000	0	0	0	0	0	0	283630000	186970000	96653000	3757700	1813500	1944200
URA5	1	6	6	6	5	5	4	4	0	0	4	0	24.664	226	0.99787	0.98461	0.92251	0.87057	NaN	NaN	0.70689	NaN	22194000000	12077000000	10116000000	9149400000	4667900000	4481500000	5840400000	3184700000	2655600000	3993600000	2321000000	1672600000	3111500000	1837900000	1273500000	0	0	0	0	0	0	98762000	65775000	32987000	0	0	0
POL1	1	7	7	7	5	4	2	1	1	1	0	0	166.81	1468	1.0194	0.85989	0.87566	NaN	NaN	NaN	NaN	NaN	1457600000	854740000	602890000	834140000	543080000	291060000	320920000	135250000	185680000	230230000	131410000	98816000	66079000	41790000	24288000	4339000	2086200	2252800	1930900	1127100	803770	0	0	0	0	0	0
SPT15	1	1	1	1	0	0	0	0	0	0	1	1	27.003	240	NaN	NaN	NaN	NaN	NaN	NaN	NaN	NaN	35565000	18277000	17288000	0	0	0	0	0	0	0	0	0	0	0	0	0	0	0	0	0	0	9983400	5460100	4523300	25582000	12817000	12765000
CAP2	1	5	5	5	4	4	3	3	0	0	1	1	32.629	287	0.9959	1.2214	0.97178	1.1843	NaN	NaN	NaN	NaN	3105400000	1629400000	1476000000	858730000	467350000	391370000	696240000	367710000	328530000	688010000	346760000	341250000	835750000	429080000	406680000	0	0	0	0	0	0	26700000	18499000	8200900	0	0	0
STE12	1	3	3	3	1	3	2	1	0	0	0	0	77.866	688	NaN	0.7174	0.663	NaN	NaN	NaN	NaN	NaN	730750000	431100000	299650000	116310000	57732000	58576000	293320000	177330000	116000000	225690000	144730000	80960000	95429000	51311000	44118000	0	0	0	0	0	0	0	0	0	0	0	0
INO4	1	2	2	2	1	0	0	1	0	0	0	0	17.378	151	NaN	NaN	NaN	NaN	NaN	NaN	NaN	NaN	96859000	50999000	45860000	0	0	0	0	0	0	0	0	0	96859000	50999000	45860000	0	0	0	0	0	0	0	0	0	0	0	0
GCY1	1	2	1	1	2	2	2	1	0	1	0	0	35.079	312	NaN	NaN	NaN	NaN	NaN	NaN	NaN	NaN	5346200000	2803400000	2542800000	915070000	527250000	387820000	1877900000	1068400000	809560000	1899900000	870530000	1029400000	642840000	330270000	312570000	0	0	0	10426000	6947600	3478100	0	0	0	0	0	0
ABF1	1	8	8	8	5	2	4	3	0	2	0	1	81.752	731	0.99844	0.99292	1.0337	1.0127	NaN	2.0671	NaN	NaN	2034600000	1088100000	946480000	840850000	451460000	389380000	285580000	147270000	138310000	464570000	236910000	227670000	401760000	233970000	167790000	0	0	0	25100000	9789900	15310000	0	0	0	16720000	8713200	8006600
TFS1	1	3	3	3	2	2	2	1	0	0	0	0	24.357	219	1.5749	1.3434	1.7761	NaN	NaN	NaN	NaN	NaN	1350200000	591630000	758610000	755980000	326760000	429220000	200920000	92379000	108540000	288030000	123390000	164640000	105320000	49100000	56216000	0	0	0	0	0	0	0	0	0	0	0	0
YAK1	1	1	1	1	0	1	0	0	0	0	0	0	91.244	807	NaN	NaN	NaN	NaN	NaN	NaN	NaN	NaN	70851000	41414000	29438000	0	0	0	70851000	41414000	29438000	0	0	0	0	0	0	0	0	0	0	0	0	0	0	0	0	0	0
CDC34	1	2	2	2	2	2	2	0	0	0	0	0	34.064	295	0.81231	0.87931	0.78958	NaN	NaN	NaN	NaN	NaN	786590000	485030000	301560000	317700000	205660000	112050000	245000000	138060000	106940000	223890000	141310000	82572000	0	0	0	0	0	0	0	0	0	0	0	0	0	0	0
SAM35	1	2	2	2	1	1	1	1	1	1	1	1	37.404	329	NaN	1.3095	0.86365	NaN	NaN	NaN	NaN	NaN	1233600000	644160000	589460000	376910000	156970000	219940000	140440000	66253000	74190000	105410000	66002000	39405000	298290000	152040000	146240000	38769000	27062000	11707000	27097000	18073000	9024000	121780000	80069000	41707000	124930000	77685000	47243000
GCN3	1	2	2	2	1	1	0	0	0	0	1	1	34.025	305	NaN	NaN	NaN	NaN	NaN	NaN	0.8301	0.96393	716140000	342670000	373470000	415680000	207480000	208200000	271750000	118780000	152970000	0	0	0	0	0	0	0	0	0	0	0	0	17152000	9546500	7605900	11561000	6859100	4701600
GFA1	1	13	13	13	9	8	9	9	0	0	0	0	80.046	717	1.0263	1.0528	1.1088	1.135	NaN	NaN	NaN	NaN	14926000000	7957300000	6968500000	5200000000	2898400000	2301700000	2953600000	1543700000	1409900000	2937300000	1575000000	1362300000	3834800000	1940200000	1894600000	0	0	0	0	0	0	0	0	0	0	0	0
NMT1	1	8	8	8	2	3	1	3	1	1	2	3	52.837	455	0.38455	1.1358	1.1246	1.2348	NaN	NaN	1.8181	1.2478	2780100000	1522800000	1257200000	308840000	222380000	86457000	461680000	237910000	223770000	933070000	501360000	431700000	1029300000	534800000	494530000	10821000	6026500	4794600	805200	532460	272740	15740000	7628800	8111200	19784000	12204000	7580500
CMP2	1	5	5	5	4	3	4	1	0	0	0	0	68.527	604	1.0306	0.9112	1.0754	NaN	NaN	NaN	NaN	NaN	1873400000	1046500000	826960000	776310000	434620000	341680000	405740000	235100000	170640000	617050000	336720000	280330000	74321000	40013000	34308000	0	0	0	0	0	0	0	0	0	0	0	0
ARO3	1	9	9	9	5	4	5	8	1	1	2	2	41.069	370	0.97624	1.0154	1.0113	1.0325	NaN	NaN	NaN	NaN	13035000000	7292700000	5742200000	7505700000	4322200000	3183500000	2034600000	1087300000	947270000	1466400000	770720000	695660000	1889800000	1033500000	856290000	28503000	22020000	6483800	20627000	16278000	4348800	38338000	17904000	20433000	50978000	22794000	28184000
CBS2	1	1	1	1	0	0	0	0	0	0	1	1	44.607	389	NaN	NaN	NaN	NaN	NaN	NaN	NaN	NaN	20032000	11802000	8229600	0	0	0	0	0	0	0	0	0	0	0	0	0	0	0	0	0	0	12213000	7307300	4905600	7819000	4494900	3324100
CYC8	1	15	15	15	11	10	10	10	0	0	0	1	107.2	966	0.98322	0.93357	0.88618	0.84099	NaN	NaN	NaN	NaN	12671000000	6958400000	5712800000	4878400000	2616900000	2261500000	2731100000	1463700000	1267400000	2335800000	1296900000	1038900000	2708300000	1578300000	1130000000	0	0	0	0	0	0	0	0	0	17693000	2659200	15034000
KRS1	1	18	18	18	12	11	9	10	1	3	12	12	67.958	591	1.0264	1.0019	0.99595	0.95831	NaN	0.44205	0.91947	1.0152	79599000000	44296000000	35303000000	36269000000	20223000000	16046000000	17967000000	9853400000	8113100000	12480000000	6983500000	5496400000	10439000000	5825100000	4614200000	30740000	21577000	9163500	94387000	69633000	24754000	1199500000	710940000	488610000	1119500000	609130000	510330000
AMD1	1	10	10	10	6	4	5	3	0	1	1	2	93.3	810	0.95156	0.91602	1.071	1.0954	NaN	NaN	NaN	1.1734	3441300000	1747500000	1693800000	1390100000	657400000	732750000	867480000	477690000	389790000	518000000	269650000	248350000	581910000	288590000	293320000	0	0	0	13456000	8755800	4699900	8629700	5637400	2992300	61645000	39769000	21876000
POL3	1	2	2	2	0	2	2	2	0	0	0	0	124.62	1097	NaN	0.46904	NaN	NaN	NaN	NaN	NaN	NaN	145150000	93738000	51413000	0	0	0	76791000	59327000	17465000	41916000	24361000	17555000	26445000	10051000	16393000	0	0	0	0	0	0	0	0	0	0	0	0
GCN2	1	2	2	2	0	0	0	2	0	0	0	0	190.19	1659	NaN	NaN	NaN	0.84544	NaN	NaN	NaN	NaN	448700000	279510000	169200000	0	0	0	0	0	0	0	0	0	448700000	279510000	169200000	0	0	0	0	0	0	0	0	0	0	0	0
IDI1	1	7	7	7	7	4	4	3	0	0	0	0	33.351	288	1.0338	1.0612	1.0713	1.0356	NaN	NaN	NaN	NaN	24374000000	13055000000	11319000000	5651400000	3198100000	2453300000	7193500000	3649900000	3543600000	5142200000	2813300000	2329000000	6386700000	3393600000	2993000000	0	0	0	0	0	0	0	0	0	0	0	0
FRS1	1	25	25	25	16	13	10	11	1	3	7	10	67.364	595	0.98508	1.0256	1.0581	1.0405	NaN	0.78847	1.0164	1.0664	46533000000	25561000000	20972000000	15880000000	8794500000	7085100000	13933000000	7746100000	6186900000	9505200000	5126100000	4379100000	6311900000	3363600000	2948300000	6769000	4309000	2459900	59682000	36459000	23222000	430920000	242760000	188160000	406410000	247410000	159000000
URA6	1	5	5	5	3	3	1	1	0	1	1	0	22.933	204	0.94044	1.111	NaN	NaN	NaN	NaN	0.68834	NaN	414240000	249240000	165000000	182130000	105480000	76650000	162040000	92496000	69541000	0	0	0	0	0	0	0	0	0	27358000	22579000	4779100	42713000	28687000	14026000	0	0	0
UBC4	2	3	3	3	1	1	1	1	0	1	3	3	16.456	148	1.0608	0.94118	0.97861	0.9908	NaN	NaN	0.92816	0.96853	9058500000	5405800000	3652800000	2789900000	1542100000	1247800000	2177200000	1349900000	827300000	2119200000	1315500000	803640000	1522600000	934540000	588080000	0	0	0	13240000	9691800	3548500	222670000	134920000	87749000	213710000	119020000	94696000
CKA1	1	5	5	5	3	3	2	1	1	1	2	2	44.667	372	0.98903	1.1062	1.1252	NaN	NaN	NaN	0.97959	NaN	1184800000	705610000	479170000	359300000	202830000	156470000	439860000	292300000	147560000	192760000	93133000	99623000	107200000	65741000	41455000	7847500	5719700	2127800	10886000	7326800	3559300	42343000	26241000	16102000	24591000	12316000	12275000
MIP1	1	1	1	1	0	0	0	0	0	0	0	1	143.5	1254	NaN	NaN	NaN	NaN	NaN	NaN	NaN	0.56896	50695000	34835000	15859000	0	0	0	0	0	0	0	0	0	0	0	0	0	0	0	0	0	0	0	0	0	50695000	34835000	15859000
POL30	1	6	6	6	2	2	2	3	1	2	2	0	28.916	258	1.0477	1.0498	1.0474	1.0251	NaN	0.91437	0.83366	NaN	10982000000	6059800000	4922300000	2197800000	1281700000	916010000	1251600000	687220000	564350000	3883700000	2145100000	1738600000	3614600000	1924000000	1690600000	0	0	0	12304000	8607800	3696000	22225000	13115000	9109900	0	0	0
PRP16	1	1	1	1	0	0	0	1	0	0	0	0	121.65	1071	NaN	NaN	NaN	NaN	NaN	NaN	NaN	NaN	0	0	0	0	0	0	0	0	0	0	0	0	0	0	0	0	0	0	0	0	0	0	0	0	0	0	0
HSP26	1	3	3	3	3	2	2	2	0	1	1	0	23.879	214	1.2699	2.49	2.5569	2.019	NaN	NaN	NaN	NaN	5245900000	2066300000	3179600000	1571600000	742090000	829490000	1431100000	503830000	927320000	1289300000	432450000	856840000	911430000	369840000	541600000	0	0	0	11276000	4472700	6802900	31195000	13642000	17553000	0	0	0
RPB3	1	4	4	4	2	2	2	1	0	1	1	0	35.297	318	1.1154	1.0677	1.121	NaN	NaN	NaN	NaN	NaN	2146400000	1160100000	986270000	765350000	422310000	343040000	467820000	255210000	212610000	526210000	283180000	243040000	372100000	191680000	180420000	0	0	0	2210300	1027100	1183200	12689000	6714700	5974500	0	0	0
CDC23	1	1	1	1	0	1	0	0	0	0	0	0	73.113	626	NaN	NaN	NaN	NaN	NaN	NaN	NaN	NaN	114360000	65645000	48718000	0	0	0	114360000	65645000	48718000	0	0	0	0	0	0	0	0	0	0	0	0	0	0	0	0	0	0
APA1	1	13	13	13	12	10	9	9	1	0	3	2	36.492	321	0.97907	1.0108	1.0602	1.0229	NaN	NaN	1.1586	0.94801	24977000000	13707000000	11270000000	11440000000	6437000000	5003100000	5754400000	3043500000	2710900000	4247600000	2337100000	1910500000	3462600000	1849000000	1613600000	0	0	0	0	0	0	46382000	26106000	20276000	25431000	14316000	11115000
ATE1	1	2	2	2	2	1	0	0	0	0	0	0	57.93	503	1.0761	NaN	NaN	NaN	NaN	NaN	NaN	NaN	439590000	235280000	204310000	352500000	199070000	153430000	87086000	36213000	50873000	0	0	0	0	0	0	0	0	0	0	0	0	0	0	0	0	0	0
TUP1	1	9	9	9	7	8	8	9	0	0	1	2	78.307	713	0.99631	0.95758	0.92454	0.91118	NaN	NaN	NaN	1.2119	20576000000	11520000000	9055300000	4563300000	2570300000	1993000000	4929900000	2695100000	2234900000	5994700000	3416500000	2578200000	5040200000	2817700000	2222500000	0	0	0	0	0	0	5606500	3679900	1926700	41954000	17163000	24791000
STF2	1	1	1	1	1	1	1	0	0	0	0	0	9.6144	84	NaN	NaN	NaN	NaN	NaN	NaN	NaN	NaN	784180000	374030000	410150000	289110000	150770000	138330000	224670000	94671000	130000000	270390000	128590000	141810000	0	0	0	0	0	0	0	0	0	0	0	0	0	0	0
SEC2	1	3	3	3	1	1	2	1	0	0	1	1	84.651	759	0.94592	NaN	1.4728	NaN	NaN	NaN	NaN	NaN	3524900000	2908100000	616870000	493820000	226370000	267450000	370990000	321090000	49899000	947140000	707370000	239770000	1690700000	1641000000	49681000	0	0	0	0	0	0	11483000	7030800	4452100	10810000	5194800	5615500
CBF1	1	8	8	8	6	6	6	4	0	2	0	0	39.387	351	1.0497	1.013	1.0304	1.0141	NaN	2.1189	NaN	NaN	10447000000	5742900000	4704200000	3103200000	1702200000	1401000000	2358500000	1254500000	1104000000	2953200000	1655300000	1297900000	1999500000	1116600000	882940000	0	0	0	32704000	14278000	18426000	0	0	0	0	0	0
KAR3	1	4	4	4	3	1	1	1	0	0	0	0	84.003	729	0.75329	NaN	NaN	NaN	NaN	NaN	NaN	NaN	480560000	261670000	218890000	276540000	157560000	118980000	56414000	25938000	30477000	87548000	46365000	41183000	60050000	31804000	28246000	0	0	0	0	0	0	0	0	0	0	0	0
SAC7	1	4	4	4	1	2	0	1	1	1	1	2	73.628	654	NaN	NaN	NaN	NaN	NaN	NaN	NaN	1.0284	276860000	158280000	118580000	78348000	37311000	41037000	58749000	25412000	33338000	0	0	0	0	0	0	17730000	15066000	2663700	4946000	3985700	960280	11871000	5390000	6481200	105220000	71118000	34099000
PHO85	1	4	4	4	2	1	1	0	0	0	1	1	34.906	305	1.2468	NaN	NaN	NaN	NaN	NaN	NaN	NaN	1926600000	1005800000	920810000	1604700000	878320000	726340000	199430000	84064000	115370000	102350000	30477000	71868000	0	0	0	0	0	0	0	0	0	20154000	12923000	7231500	0	0	0
THR1	1	3	3	3	3	1	1	3	1	0	1	0	38.712	357	0.96058	NaN	NaN	1.0682	NaN	NaN	NaN	NaN	3339000000	1839100000	1499900000	1717900000	967690000	750230000	608320000	309480000	298840000	521220000	292190000	229030000	491550000	269750000	221800000	0	0	0	0	0	0	0	0	0	0	0	0
PHO81	1	1	1	1	1	1	1	0	0	0	0	0	134.03	1178	NaN	NaN	NaN	NaN	NaN	NaN	NaN	NaN	263320000	146140000	117180000	74515000	44927000	29588000	121320000	64004000	57315000	67487000	37213000	30274000	0	0	0	0	0	0	0	0	0	0	0	0	0	0	0
TPM1	1	13	13	13	12	10	10	10	0	0	0	0	23.54	199	0.99295	0.99775	1.0516	1.0008	NaN	NaN	NaN	NaN	67048000000	37535000000	29513000000	19119000000	10914000000	8204100000	13029000000	7260600000	5768400000	19155000000	10515000000	8639700000	15746000000	8845100000	6900900000	0	0	0	0	0	0	0	0	0	0	0	0
HPR1	1	3	3	3	1	2	2	1	0	0	1	0	87.828	752	NaN	NaN	1.049	NaN	NaN	NaN	NaN	NaN	1035800000	410670000	625150000	182900000	71300000	111600000	139840000	98633000	41205000	455320000	179210000	276110000	253010000	58926000	194090000	0	0	0	0	0	0	4757400	2601700	2155700	0	0	0
UGA1	1	5	5	5	3	2	3	2	1	0	0	0	52.946	471	1.1153	1.2126	1.2085	1.3607	NaN	NaN	NaN	NaN	3202000000	1514200000	1687800000	1015700000	521210000	494530000	496590000	228940000	267650000	867820000	375610000	492210000	809380000	380740000	428630000	12489000	7731200	4757600	0	0	0	0	0	0	0	0	0
GLK1	2	15	15	15	7	4	4	6	2	1	6	5	55.377	500	1.1251	1.3421	1.35	1.3403	NaN	NaN	1.117	0.90916	5139200000	2707000000	2432200000	3035400000	1584100000	1451300000	609180000	285280000	323900000	558200000	289400000	268800000	508410000	255470000	252940000	36206000	29594000	6611700	20230000	13636000	6594300	142270000	85183000	57085000	229300000	164370000	64927000
SKI3	1	7	7	7	6	4	5	4	0	0	0	1	163.72	1432	0.96139	0.94287	1.1528	1.3206	NaN	NaN	NaN	NaN	3225700000	1736800000	1488900000	1045100000	582740000	462410000	679430000	395150000	284280000	836290000	434520000	401770000	657610000	321410000	336200000	0	0	0	0	0	0	0	0	0	7251100	3032900	4218200
RPC31	1	4	4	4	3	2	1	3	0	0	0	0	27.724	251	1.0613	NaN	0.81644	0.95227	NaN	NaN	NaN	NaN	776260000	411480000	364780000	309990000	158480000	151500000	127010000	73608000	53405000	167160000	84943000	82215000	172100000	94448000	77656000	0	0	0	0	0	0	0	0	0	0	0	0
CLC1	1	10	10	10	5	9	7	8	0	0	0	0	26.531	233	1.0302	1.0187	1.0634	1.0838	NaN	NaN	NaN	NaN	14212000000	7178400000	7034100000	4333100000	2294400000	2038700000	3992900000	2085000000	1907900000	3191200000	1583900000	1607300000	2695400000	1215100000	1480200000	0	0	0	0	0	0	0	0	0	0	0	0
CPT1	1	1	1	1	1	0	0	0	1	1	1	1	44.829	393	NaN	NaN	NaN	NaN	NaN	NaN	NaN	NaN	1518300000	984670000	533670000	0	0	0	0	0	0	0	0	0	0	0	0	405810000	287000000	118810000	218930000	132110000	86818000	578110000	377480000	200630000	315470000	188070000	127410000
MDM10	1	3	3	3	2	0	0	0	1	2	1	2	56.236	493	0.92646	NaN	NaN	NaN	NaN	1.0063	NaN	0.74335	472220000	290770000	181450000	318620000	176500000	142120000	0	0	0	0	0	0	0	0	0	42259000	37659000	4599900	45689000	26031000	19658000	27829000	20638000	7191500	37822000	29947000	7874900
TEC1	1	2	1	1	1	0	0	0	1	1	1	1	55.157	486	NaN	NaN	NaN	NaN	NaN	NaN	NaN	NaN	81780000	59465000	22314000	81780000	59465000	22314000	0	0	0	0	0	0	0	0	0	0	0	0	0	0	0	0	0	0	0	0	0
ATP10	1	3	3	3	1	0	0	0	1	1	2	1	32.094	279	NaN	NaN	NaN	NaN	NaN	NaN	0.60935	NaN	152870000	91346000	61525000	110320000	64360000	45960000	0	0	0	0	0	0	0	0	0	8680000	5701400	2978700	9353600	4634300	4719200	16169000	11614000	4554300	8349600	5036100	3313500
DDR48	1	4	4	4	3	2	3	2	0	0	0	0	46.233	430	1.2356	1.3104	1.4544	1.5279	NaN	NaN	NaN	NaN	1063100000	462630000	600480000	193240000	96594000	96641000	183420000	79710000	103710000	228260000	95706000	132560000	458200000	190620000	267580000	0	0	0	0	0	0	0	0	0	0	0	0
YPK2	1	6	5	5	0	0	1	0	1	3	2	4	76.663	677	NaN	NaN	NaN	NaN	NaN	0.41253	NaN	1.1041	48543000	31090000	17452000	0	0	0	0	0	0	0	0	0	0	0	0	0	0	0	7859300	6995000	864300	11710000	6936200	4773700	28973000	17159000	11815000
ANB1	1	4	1	1	2	2	2	2	2	1	2	3	17.131	157	NaN	NaN	NaN	NaN	NaN	NaN	NaN	NaN	438900000	303310000	135580000	438900000	303310000	135580000	0	0	0	0	0	0	0	0	0	0	0	0	0	0	0	0	0	0	0	0	0
RGR1	1	3	3	3	2	1	0	0	0	0	1	0	123.36	1082	0.9757	NaN	NaN	NaN	NaN	NaN	NaN	NaN	247630000	122500000	125130000	126760000	60069000	66688000	113170000	57726000	55442000	0	0	0	0	0	0	0	0	0	0	0	0	7708400	4706600	3001800	0	0	0
COX11	1	2	2	2	1	1	1	0	0	2	1	1	34.044	300	NaN	NaN	NaN	NaN	NaN	0.73798	NaN	NaN	1116800000	636000000	480760000	343390000	178070000	165320000	204410000	121310000	83099000	118280000	62425000	55851000	0	0	0	0	0	0	35320000	22683000	12637000	210990000	123890000	87099000	204380000	127620000	76755000
EXO70	1	3	3	3	2	0	2	1	1	0	1	1	71.293	623	NaN	NaN	NaN	NaN	NaN	NaN	NaN	NaN	173950000	106450000	67504000	43000000	27751000	15248000	0	0	0	66131000	34890000	31241000	64819000	43804000	21015000	0	0	0	0	0	0	0	0	0	0	0	0
GAL11	1	3	3	3	2	1	1	2	0	0	0	0	120.31	1081	NaN	NaN	NaN	0.65576	NaN	NaN	NaN	NaN	658770000	210500000	448270000	185780000	49641000	136140000	164050000	48299000	115750000	147620000	48144000	99478000	161310000	64412000	96902000	0	0	0	0	0	0	0	0	0	0	0	0
PRP6	1	3	3	3	2	2	1	1	0	0	0	0	104.23	899	0.39838	1.3849	1.3731	NaN	NaN	NaN	NaN	NaN	1206400000	790900000	415520000	615510000	518170000	97342000	407310000	179860000	227450000	183600000	92871000	90729000	0	0	0	0	0	0	0	0	0	0	0	0	0	0	0
PRP9	1	1	1	1	1	1	1	1	0	0	0	0	63.029	530	0.81387	1.0051	NaN	NaN	NaN	NaN	NaN	NaN	613740000	331530000	282210000	192350000	113730000	78616000	198130000	103630000	94509000	116390000	59793000	56600000	106870000	54382000	52484000	0	0	0	0	0	0	0	0	0	0	0	0
UBR1	1	7	7	7	3	6	2	3	0	0	0	0	224.84	1950	1.0662	1.0372	1.0824	1.1181	NaN	NaN	NaN	NaN	1003400000	519600000	483850000	341660000	192950000	148720000	337960000	186490000	151470000	171630000	64374000	107260000	152190000	75783000	76410000	0	0	0	0	0	0	0	0	0	0	0	0
YAP1	1	5	5	5	1	3	3	2	0	0	0	0	72.532	650	1.0885	1.0409	0.85142	0.82555	NaN	NaN	NaN	NaN	1265200000	713640000	551600000	334640000	182530000	152110000	461990000	262530000	199460000	269010000	165270000	103730000	199600000	103300000	96300000	0	0	0	0	0	0	0	0	0	0	0	0
PHO13	1	9	9	9	7	9	8	9	0	0	0	0	34.624	312	1.0653	1.0952	1.144	1.1811	NaN	NaN	NaN	NaN	11170000000	5746300000	5423300000	3171500000	1602600000	1568800000	2896600000	1525700000	1370900000	3021800000	1608000000	1413800000	2079700000	1009900000	1069800000	0	0	0	0	0	0	0	0	0	0	0	0
YMR31	1	5	5	5	1	0	0	0	0	2	4	3	13.689	123	NaN	NaN	NaN	NaN	NaN	1.0313	1.0332	0.95773	786320000	424430000	361890000	376670000	182790000	193880000	0	0	0	0	0	0	0	0	0	0	0	0	48735000	28797000	19938000	166680000	99665000	67010000	194240000	113180000	81058000
MRPL44	1	2	2	2	0	0	0	1	0	1	0	0	11.476	98	NaN	NaN	NaN	NaN	NaN	NaN	NaN	NaN	4767500	3146400	1621100	0	0	0	0	0	0	0	0	0	0	0	0	0	0	0	4767500	3146400	1621100	0	0	0	0	0	0
TYR1	1	6	6	6	5	3	3	2	0	0	0	0	50.923	452	0.98769	1.1238	1.0695	1.0645	NaN	NaN	NaN	NaN	1340700000	675860000	664850000	744190000	371280000	372910000	242250000	115500000	126750000	229610000	115460000	114150000	124660000	73623000	51037000	0	0	0	0	0	0	0	0	0	0	0	0
URA4	1	8	8	8	6	5	5	5	2	2	2	1	40.313	364	0.94271	1.1003	1.0422	1.0528	NaN	NaN	NaN	NaN	10686000000	5711700000	4974100000	4282000000	2330000000	1952000000	2890500000	1583200000	1307400000	2713900000	1333100000	1380800000	762250000	442830000	319420000	4168900	3214200	954760	3294000	2854900	439060	10515000	6418100	4096900	19205000	10120000	9084900
PRP4	1	2	2	2	1	0	1	1	0	0	0	0	52.442	465	NaN	NaN	NaN	NaN	NaN	NaN	NaN	NaN	389110000	226980000	162140000	210510000	133760000	76755000	0	0	0	125460000	66774000	58690000	53137000	26447000	26690000	0	0	0	0	0	0	0	0	0	0	0	0
FPR1	1	6	6	6	6	4	5	5	1	0	0	0	12.158	114	1.033	1.0443	1.0536	1.0444	NaN	NaN	NaN	NaN	110210000000	59951000000	50256000000	37255000000	21187000000	16068000000	20906000000	11149000000	9757200000	26720000000	14221000000	12500000000	25326000000	13395000000	11931000000	0	0	0	0	0	0	0	0	0	0	0	0
MRPL33	1	2	2	2	1	1	1	1	0	0	0	2	9.5311	86	NaN	NaN	NaN	NaN	NaN	NaN	NaN	1.7548	623060000	357420000	265630000	295020000	167760000	127270000	0	0	0	0	0	0	199380000	121630000	77750000	0	0	0	0	0	0	0	0	0	128660000	68039000	60618000
BET2	1	1	1	1	0	1	1	1	0	0	0	0	36.666	325	NaN	NaN	NaN	NaN	NaN	NaN	NaN	NaN	55670000	26545000	29125000	0	0	0	0	0	0	23395000	10505000	12890000	32276000	16041000	16235000	0	0	0	0	0	0	0	0	0	0	0	0
RPB4	1	5	5	5	5	3	1	1	0	2	0	0	25.414	221	0.99491	0.92478	1.0044	1.0006	NaN	2.0937	NaN	NaN	5431100000	2896100000	2535000000	1797700000	968480000	829210000	1759900000	889270000	870640000	1549000000	857290000	691690000	228590000	149210000	79384000	0	0	0	95950000	31853000	64097000	0	0	0	0	0	0
RPB5	1	7	7	7	3	2	2	1	2	3	4	3	25.079	215	0.95991	0.95391	1.1298	NaN	NaN	1.0953	1.1373	0.98306	3663100000	2042500000	1620700000	617320000	368670000	248640000	595760000	295030000	300730000	1068900000	577760000	491150000	521290000	305040000	216250000	20976000	12957000	8019100	99106000	62072000	37033000	507890000	310860000	197030000	231870000	110070000	121810000
RPO26	1	2	2	2	1	2	1	1	0	0	0	0	17.91	155	1.7797	1.0754	1.035	1.0192	NaN	NaN	NaN	NaN	10506000000	4270600000	6235400000	4903300000	1429900000	3473400000	2693300000	1246400000	1446900000	1967400000	1087900000	879520000	942040000	506440000	435600000	0	0	0	0	0	0	0	0	0	0	0	0
PRI2	1	3	3	3	0	1	1	0	0	0	1	0	62.262	528	NaN	NaN	NaN	NaN	NaN	NaN	NaN	NaN	242360000	127940000	114420000	0	0	0	52690000	27616000	25074000	177490000	93045000	84440000	0	0	0	0	0	0	0	0	0	12185000	7282200	4902400	0	0	0
MAK11	1	2	2	2	1	0	0	0	0	1	1	0	47.29	414	NaN	NaN	NaN	NaN	NaN	NaN	NaN	NaN	139780000	100830000	38948000	72403000	56094000	16309000	0	0	0	0	0	0	0	0	0	0	0	0	12640000	10592000	2048200	54739000	34148000	20591000	0	0	0
CKI1	1	6	6	6	3	4	3	5	0	0	0	0	66.316	582	0.87476	1.0186	1.1424	0.94827	NaN	NaN	NaN	NaN	4648500000	3691000000	957440000	1345200000	887600000	457610000	710350000	485940000	224400000	332870000	158220000	174650000	2260000000	2159300000	100770000	0	0	0	0	0	0	0	0	0	0	0	0
SIT4	1	4	4	4	4	1	2	1	0	0	0	0	35.537	311	1.0197	0.82041	0.74945	NaN	NaN	NaN	NaN	NaN	1239100000	754560000	484550000	717370000	476610000	240760000	109780000	59000000	50784000	255780000	138450000	117330000	156190000	80507000	75679000	0	0	0	0	0	0	0	0	0	0	0	0
SAG1	1	1	1	1	0	1	0	0	1	1	1	0	70.339	650	NaN	NaN	NaN	NaN	NaN	NaN	NaN	NaN	126060000	78422000	47635000	0	0	0	68661000	29981000	38680000	0	0	0	0	0	0	25904000	25904000	0	20985000	14516000	6469000	10507000	8021100	2485900	0	0	0
SPE2	1	7	7	7	7	7	5	5	0	0	0	0	46.232	396	0.98684	0.76977	0.77994	0.86529	NaN	NaN	NaN	NaN	8357200000	4420900000	3936300000	3460600000	1927300000	1533300000	1675800000	876210000	799640000	1901500000	881460000	1020000000	1319200000	735890000	583350000	0	0	0	0	0	0	0	0	0	0	0	0
ACE2	1	2	2	2	1	1	0	0	0	0	0	0	86.633	770	NaN	NaN	NaN	NaN	NaN	NaN	NaN	NaN	583790000	327960000	255830000	0	0	0	583790000	327960000	255830000	0	0	0	0	0	0	0	0	0	0	0	0	0	0	0	0	0	0
SCL1	1	13	13	13	8	8	8	6	1	0	4	2	28.001	252	1.0482	1.064	1.1086	1.1483	NaN	NaN	1.4099	NaN	16779000000	8721800000	8057100000	5348900000	2867600000	2481300000	4589600000	2381300000	2208300000	3693300000	1877700000	1815600000	3078300000	1557600000	1520600000	3163000	2362400	800580	0	0	0	46945000	25367000	21578000	18767000	9834600	8932200
ADE2	1	10	10	10	8	7	5	5	0	1	3	0	62.339	571	0.98228	1.0989	1.0827	1.1409	NaN	NaN	0.92158	NaN	10258000000	5417800000	4839900000	3669000000	1972600000	1696400000	2665600000	1357400000	1308200000	2095700000	1099400000	996320000	1762300000	932810000	829440000	0	0	0	11551000	8693000	2857700	53621000	46947000	6674300	0	0	0
FAR1	1	2	2	2	1	0	0	0	0	0	1	0	94.571	830	NaN	NaN	NaN	NaN	NaN	NaN	NaN	NaN	19735000	15357000	4377700	0	0	0	0	0	0	0	0	0	0	0	0	0	0	0	0	0	0	19735000	15357000	4377700	0	0	0
CCA1	1	6	6	6	2	1	0	0	0	2	4	2	62.484	546	1.0202	NaN	NaN	NaN	NaN	NaN	0.84472	1.0574	715570000	428570000	287000000	387020000	222790000	164230000	52411000	32598000	19813000	0	0	0	0	0	0	0	0	0	28027000	23002000	5025500	187440000	116540000	70902000	60678000	33643000	27035000
PWP1	1	13	13	13	10	7	9	12	0	0	0	1	63.803	576	0.93927	0.93548	0.88978	0.92401	NaN	NaN	NaN	NaN	11021000000	6427100000	4594300000	3380400000	2044900000	1335500000	1526900000	856630000	670230000	3761600000	2201700000	1559800000	2332100000	1312400000	1019700000	0	0	0	0	0	0	0	0	0	20411000	11385000	9026300
MSB1	1	5	5	5	2	1	2	1	1	0	1	1	129.97	1137	NaN	NaN	2.6552	NaN	NaN	NaN	NaN	NaN	728840000	234590000	494250000	0	0	0	180890000	40580000	140310000	407530000	144870000	262660000	123620000	40669000	82949000	0	0	0	0	0	0	0	0	0	16807000	8477300	8329600
UTR1	1	4	4	4	2	2	3	3	0	0	1	0	59.469	530	0.968	1.0368	1.1628	0.91274	NaN	NaN	NaN	NaN	1320100000	710930000	609180000	164900000	86239000	78656000	233740000	124640000	109090000	526720000	275300000	251420000	384140000	220840000	163300000	0	0	0	0	0	0	10621000	3911800	6709500	0	0	0
RNR1	1	9	9	9	6	6	4	5	0	0	2	2	99.56	888	0.97061	0.75681	0.70415	0.70817	NaN	NaN	1.0106	0.91358	24800000000	14261000000	10538000000	7133500000	4047800000	3085700000	6085800000	3623900000	2461900000	5897800000	3500300000	2397500000	5409300000	2922300000	2487000000	0	0	0	0	0	0	172650000	105510000	67140000	100720000	61492000	39231000
REB1	1	9	9	9	6	6	4	4	0	2	0	0	91.873	810	1.0258	1.0754	0.95871	0.99542	NaN	2.363	NaN	NaN	9571100000	5214700000	4356400000	4367100000	2310200000	2056900000	2877300000	1555700000	1321600000	1475800000	841730000	634090000	833830000	500060000	333760000	0	0	0	17102000	7046900	10056000	0	0	0	0	0	0
COX10	1	1	1	1	0	0	0	0	0	1	0	0	52.147	462	NaN	NaN	NaN	NaN	NaN	NaN	NaN	NaN	8054700	4055900	3998800	0	0	0	0	0	0	0	0	0	0	0	0	0	0	0	8054700	4055900	3998800	0	0	0	0	0	0
RNR3	1	5	5	5	4	4	3	3	0	0	0	0	97.514	869	0.99037	0.7819	0.71476	0.48819	NaN	NaN	NaN	NaN	1448000000	870010000	578030000	412330000	209690000	202640000	339130000	216510000	122630000	338530000	210350000	128170000	358040000	233450000	124590000	0	0	0	0	0	0	0	0	0	0	0	0
UBC1	1	4	4	4	3	3	3	2	0	0	2	1	24.178	215	1.0026	1.0161	0.98741	1.0276	NaN	NaN	0.89148	1.0234	2501600000	1327200000	1174500000	898870000	461230000	437650000	532520000	278060000	254470000	590760000	338230000	252540000	391480000	195710000	195770000	0	0	0	0	0	0	66747000	42585000	24162000	21230000	11352000	9877700
SRM1	1	9	9	9	5	5	3	4	0	4	3	3	53.013	482	1.0152	0.96146	1.0269	0.95359	NaN	1.8178	0.91175	0.92599	4192500000	2122700000	2069800000	1256300000	660590000	595700000	1143800000	562480000	581290000	763860000	370800000	393060000	841980000	428380000	413590000	0	0	0	77636000	35857000	41779000	47168000	26347000	20820000	61779000	38269000	23510000
POL2	1	4	4	4	3	2	2	0	0	0	1	1	255.67	2222	1.0987	1.0987	NaN	NaN	NaN	NaN	1.5966	NaN	383630000	193370000	190260000	262330000	132440000	129880000	89819000	46078000	43741000	17162000	7686700	9475200	0	0	0	0	0	0	0	0	0	7658300	3900200	3758100	6664000	3261900	3402100
RAM1	1	1	1	1	0	0	0	1	0	0	0	0	48.189	431	NaN	NaN	NaN	NaN	NaN	NaN	NaN	NaN	91048000	60092000	30956000	0	0	0	0	0	0	0	0	0	91048000	60092000	30956000	0	0	0	0	0	0	0	0	0	0	0	0
SNF2	1	4	4	4	1	1	1	1	1	0	0	1	194.05	1703	1.7337	NaN	NaN	0.97893	NaN	NaN	NaN	NaN	586480000	321180000	265300000	166580000	73746000	92830000	113290000	62549000	50743000	104540000	45798000	58740000	145000000	92700000	52298000	34190000	26605000	7584800	0	0	0	0	0	0	22887000	19786000	3101400
ATP12	1	10	10	10	1	1	1	1	2	7	10	7	36.554	325	0.94705	NaN	NaN	NaN	NaN	0.92441	0.93078	0.98682	1285800000	762030000	523790000	80172000	44508000	35664000	48602000	26759000	21843000	85394000	44348000	41047000	89681000	49874000	39807000	3041300	2506900	534390	166740000	90595000	76145000	525950000	326670000	199280000	286240000	176770000	109460000
AEP2	1	2	2	2	0	0	0	0	0	0	1	1	67.523	580	NaN	NaN	NaN	NaN	NaN	NaN	NaN	NaN	26757000	20523000	6233500	0	0	0	0	0	0	0	0	0	0	0	0	0	0	0	0	0	0	15537000	13405000	2132600	11220000	7118600	4100900
RPB10	1	2	2	2	0	0	0	0	0	0	2	2	8.2776	70	NaN	NaN	NaN	NaN	NaN	NaN	0.92397	0.70545	119350000	74842000	44512000	0	0	0	0	0	0	0	0	0	0	0	0	0	0	0	0	0	0	49267000	30253000	19013000	70088000	44589000	25499000
PRE1	1	3	3	3	3	3	2	2	0	0	0	1	22.516	198	1.0125	NaN	1.2132	1.4103	NaN	NaN	NaN	NaN	1277000000	689020000	588020000	535800000	287390000	248410000	225520000	121880000	103640000	347250000	182130000	165120000	168470000	97610000	70859000	0	0	0	0	0	0	0	0	0	0	0	0
MSN1	1	1	1	1	1	1	1	0	0	0	0	0	43.06	382	NaN	NaN	NaN	NaN	NaN	NaN	NaN	NaN	296270000	165510000	130760000	130720000	76207000	54517000	100080000	52363000	47714000	65464000	36935000	28529000	0	0	0	0	0	0	0	0	0	0	0	0	0	0	0
DBF2	1	4	4	4	1	2	2	1	0	0	1	0	66.147	572	NaN	NaN	NaN	NaN	NaN	NaN	NaN	NaN	206000000	69854000	136150000	8819300	5808800	3010500	123000000	24952000	98045000	20160000	15003000	5156400	8567500	4405500	4161900	0	0	0	0	0	0	45460000	19684000	25776000	0	0	0
KIN3	1	1	1	1	1	1	0	1	0	0	0	0	51.203	435	NaN	NaN	NaN	NaN	NaN	NaN	NaN	NaN	350910000	173210000	177700000	186600000	83283000	103310000	0	0	0	0	0	0	164320000	89926000	74391000	0	0	0	0	0	0	0	0	0	0	0	0
SLY41	1	2	2	2	0	0	0	0	0	1	0	1	50.902	453	NaN	NaN	NaN	NaN	NaN	NaN	NaN	NaN	0	0	0	0	0	0	0	0	0	0	0	0	0	0	0	0	0	0	0	0	0	0	0	0	0	0	0
TRX1	1	8	8	7	8	8	7	8	1	0	0	1	11.235	103	1.0399	1.0248	1.0709	1.0195	NaN	NaN	NaN	NaN	122460000000	66824000000	55631000000	31967000000	17983000000	13984000000	31812000000	16922000000	14890000000	33941000000	18522000000	15419000000	24717000000	13386000000	11330000000	0	0	0	0	0	0	0	0	0	18530000	10177000	8353000
SEC15	1	1	1	1	1	0	0	0	0	0	0	0	105.06	910	NaN	NaN	NaN	NaN	NaN	NaN	NaN	NaN	10035000	7601000	2434000	10035000	7601000	2434000	0	0	0	0	0	0	0	0	0	0	0	0	0	0	0	0	0	0	0	0	0
RET1	1	15	15	15	13	9	6	3	1	1	0	1	129.46	1149	0.97037	0.9741	0.89677	0.97038	NaN	NaN	NaN	NaN	3747100000	2111300000	1635900000	1942200000	1115100000	827120000	899680000	503500000	396190000	515830000	272310000	243510000	380680000	214470000	166210000	0	0	0	1196900	799020	397840	0	0	0	7545200	5117600	2427600
QCR9	1	1	1	1	0	0	0	0	1	1	1	1	7.4763	66	NaN	NaN	NaN	NaN	NaN	NaN	NaN	NaN	0	0	0	0	0	0	0	0	0	0	0	0	0	0	0	0	0	0	0	0	0	0	0	0	0	0	0
RFA1	1	6	6	6	5	0	1	1	0	0	0	0	70.347	621	1.0489	NaN	NaN	NaN	NaN	NaN	NaN	NaN	1068400000	574880000	493560000	970010000	526690000	443310000	0	0	0	87124000	41418000	45706000	11306000	6768000	4538500	0	0	0	0	0	0	0	0	0	0	0	0
MRPL20	1	4	4	4	2	2	2	1	1	2	2	1	22.392	195	0.99295	0.73834	0.81618	NaN	NaN	0.92345	0.90018	NaN	1776400000	1066300000	710120000	703460000	417220000	286240000	487400000	298710000	188690000	263500000	154690000	108820000	165010000	100270000	64740000	7325600	5099600	2226000	30176000	17588000	12588000	73398000	44478000	28920000	46109000	28215000	17894000
MSM1	1	4	4	4	0	0	0	0	1	3	1	3	66.734	575	NaN	NaN	NaN	NaN	NaN	0.7816	NaN	1.0546	114820000	63450000	51371000	0	0	0	0	0	0	0	0	0	0	0	0	2199400	1825500	373900	5667200	3469000	2198200	21056000	14156000	6899200	85899000	43999000	41900000
SAN1	1	2	2	2	0	2	1	1	0	0	0	0	65.617	610	NaN	NaN	NaN	NaN	NaN	NaN	NaN	NaN	89911000	55276000	34635000	0	0	0	32035000	21170000	10866000	0	0	0	57876000	34107000	23770000	0	0	0	0	0	0	0	0	0	0	0	0
CMK2	1	4	4	4	1	2	1	3	0	0	0	0	50.447	447	NaN	1.7919	NaN	2.6011	NaN	NaN	NaN	NaN	295710000	112310000	183400000	0	0	0	184550000	80274000	104280000	28655000	8133600	20522000	82503000	23906000	58598000	0	0	0	0	0	0	0	0	0	0	0	0
SIN3	1	12	12	12	5	2	4	4	1	3	1	0	174.84	1536	0.9802	1.0275	0.96967	1.074	NaN	2.0491	NaN	NaN	1935400000	1078900000	856450000	558000000	337840000	220170000	273500000	142840000	130660000	404200000	226170000	178030000	431700000	225850000	205850000	12324000	8942600	3381500	122500000	55943000	66559000	133130000	81324000	51809000	0	0	0
ARG1	1	10	10	10	9	6	8	5	0	0	0	1	46.927	420	0.95048	1.0472	1.1297	1.2924	NaN	NaN	NaN	NaN	22701000000	12248000000	10453000000	8621700000	4981600000	3640100000	6584000000	3445100000	3138900000	5667500000	2908900000	2758600000	1811700000	898790000	912920000	0	0	0	0	0	0	0	0	0	15948000	13407000	2541400
TRX2	1	8	7	7	8	7	6	6	0	0	2	0	11.204	104	1.0751	1.1682	1.2552	1.3043	NaN	NaN	2.1693	NaN	50547000000	25669000000	24878000000	12476000000	6705700000	5770100000	11994000000	6046100000	5948400000	13152000000	6537300000	6614800000	12889000000	6369200000	6519900000	0	0	0	0	0	0	35006000	10525000	24480000	0	0	0
APN1	1	6	6	6	3	5	4	4	0	1	0	1	41.439	367	1.0753	1.2065	1.0951	0.8898	NaN	NaN	NaN	1.0848	1608200000	860060000	748100000	464430000	263120000	201310000	383670000	188700000	194970000	398720000	207200000	191520000	314640000	177160000	137480000	0	0	0	8823100	4660100	4162900	0	0	0	37876000	19220000	18656000
HSP12	1	9	9	9	8	5	6	4	0	0	0	0	11.693	109	1.4806	1.822	2.141	1.381	NaN	NaN	NaN	NaN	27794000000	11778000000	16016000000	10680000000	5092300000	5588100000	8080400000	3260200000	4820200000	6883100000	2509200000	4373900000	2150100000	916100000	1234000000	0	0	0	0	0	0	0	0	0	0	0	0
SPA2	1	30	30	29	16	18	16	16	1	0	3	8	163.14	1466	0.93706	0.95604	0.97288	0.9639	NaN	NaN	0.99765	0.98706	14163000000	7786500000	6376000000	4907300000	2702200000	2205100000	3343600000	1810300000	1533400000	3099400000	1727600000	1371800000	2400200000	1307200000	1093000000	5954100	4246700	1707400	0	0	0	25658000	14165000	11494000	380390000	220800000	159590000
TAF2	1	2	2	2	1	1	1	1	0	0	0	0	161.47	1407	NaN	NaN	NaN	NaN	NaN	NaN	NaN	NaN	2578000000	1383200000	1194800000	50103000	28691000	21412000	1311600000	679380000	632170000	39494000	25602000	13892000	1176800000	649490000	527340000	0	0	0	0	0	0	0	0	0	0	0	0
CPR2	1	2	2	2	0	0	0	0	1	1	0	1	22.769	205	NaN	NaN	NaN	NaN	NaN	NaN	NaN	NaN	26337000	15984000	10353000	0	0	0	0	0	0	0	0	0	0	0	0	6008100	3532600	2475500	7825800	3678900	4146900	0	0	0	12503000	8772600	3730600
CNA1	1	2	2	2	1	1	1	1	0	0	0	0	63.001	553	NaN	NaN	NaN	NaN	NaN	NaN	NaN	NaN	1538600000	961440000	577200000	1161100000	784210000	376850000	121510000	44863000	76647000	91206000	32431000	58775000	164860000	99938000	64925000	0	0	0	0	0	0	0	0	0	0	0	0
SGV1	1	1	1	1	1	0	1	1	0	0	0	0	74.238	657	NaN	NaN	NaN	NaN	NaN	NaN	NaN	NaN	191480000	104780000	86702000	0	0	0	0	0	0	0	0	0	191480000	104780000	86702000	0	0	0	0	0	0	0	0	0	0	0	0
GSY1	1	4	4	4	2	0	2	0	0	0	0	0	80.509	708	1.234	NaN	NaN	NaN	NaN	NaN	NaN	NaN	244720000	126840000	117880000	168390000	87923000	80464000	0	0	0	76336000	38921000	37415000	0	0	0	0	0	0	0	0	0	0	0	0	0	0	0
NAR1	1	2	2	2	2	1	1	0	0	0	0	0	54.15	491	1.0253	0.40133	NaN	NaN	NaN	NaN	NaN	NaN	299070000	189100000	109970000	254440000	152180000	102260000	28938000	22447000	6490900	15695000	14475000	1220800	0	0	0	0	0	0	0	0	0	0	0	0	0	0	0
STE11	1	3	3	3	1	3	1	1	0	0	0	0	80.72	717	NaN	0.78273	NaN	NaN	NaN	NaN	NaN	NaN	465570000	324240000	141340000	63922000	38867000	25056000	350490000	259520000	90977000	51155000	25852000	25303000	0	0	0	0	0	0	0	0	0	0	0	0	0	0	0
PPH22;PPH21	2	2	2	2	2	2	1	1	0	0	1	0	43.046	377	0.90577	1.0191	1.0502	1.1175	NaN	NaN	NaN	NaN	4498300000	2482600000	2015700000	1586200000	877330000	708900000	1076700000	584290000	492420000	963150000	534720000	428430000	840460000	460720000	379740000	0	0	0	0	0	0	31753000	25536000	6217000	0	0	0
PRE8	1	9	9	9	8	8	7	7	1	2	2	4	27.162	250	0.91593	1.0845	1.1486	1.1927	NaN	NaN	NaN	1.2697	8629100000	4633800000	3995200000	2649700000	1466900000	1182800000	2124600000	1117800000	1006800000	1608300000	859980000	748340000	2104700000	1115400000	989290000	0	0	0	3411100	2596800	814250	44853000	20393000	24460000	93439000	50715000	42725000
PRE7	1	4	4	4	3	1	1	2	0	0	0	1	26.871	241	1.1102	NaN	NaN	1.1491	NaN	NaN	NaN	NaN	1054900000	538770000	516110000	318250000	175880000	142370000	241160000	119440000	121710000	202770000	102030000	100740000	270000000	129530000	140470000	0	0	0	0	0	0	0	0	0	22710000	11888000	10822000
MIH1	1	1	1	1	0	0	0	1	0	0	0	0	63.357	554	NaN	NaN	NaN	NaN	NaN	NaN	NaN	NaN	45259000	24471000	20788000	0	0	0	0	0	0	0	0	0	45259000	24471000	20788000	0	0	0	0	0	0	0	0	0	0	0	0
EXG1	1	4	4	4	0	0	0	0	1	2	4	4	51.31	448	NaN	NaN	NaN	NaN	NaN	2.8606	1.2206	0.7766	653080000	333120000	319960000	0	0	0	0	0	0	0	0	0	0	0	0	138630000	58217000	80413000	93973000	49084000	44889000	244480000	122700000	121790000	175990000	103120000	72873000
FPS1	1	1	1	1	0	0	0	0	1	0	0	0	73.877	669	NaN	NaN	NaN	NaN	NaN	NaN	NaN	NaN	24951000	16658000	8293400	0	0	0	0	0	0	0	0	0	0	0	0	24951000	16658000	8293400	0	0	0	0	0	0	0	0	0
PEX1	1	1	1	1	0	1	1	0	0	0	0	0	117.27	1043	NaN	1.0326	NaN	NaN	NaN	NaN	NaN	NaN	137230000	71853000	65380000	0	0	0	127220000	66064000	61158000	10011000	5789700	4221500	0	0	0	0	0	0	0	0	0	0	0	0	0	0	0
PHO3	3	3	3	2	2	2	2	2	1	2	0	0	52.776	467	1.0031	0.9233	0.83093	1.0384	NaN	0.38534	NaN	NaN	4491700000	2597500000	1894200000	1512400000	895540000	616900000	1454300000	807830000	646440000	921920000	552220000	369690000	572210000	318450000	253760000	12307000	9365200	2941400	18602000	14142000	4460000	0	0	0	0	0	0
MCM3	1	7	7	7	2	3	1	2	0	1	0	0	107.52	971	0.91744	NaN	NaN	1.0386	NaN	NaN	NaN	NaN	632270000	352510000	279750000	267780000	152380000	115400000	85861000	48054000	37807000	84010000	52122000	31888000	179260000	93731000	85529000	0	0	0	15359000	6227700	9131000	0	0	0	0	0	0
PRP22	1	3	3	3	2	1	1	1	0	0	0	1	130.01	1145	0.86122	NaN	NaN	NaN	NaN	NaN	NaN	NaN	227920000	112400000	115520000	132700000	72197000	60508000	46304000	23431000	22874000	44818000	14322000	30496000	0	0	0	0	0	0	0	0	0	0	0	0	4093100	2446500	1646600
DPB2	1	2	2	2	1	2	1	0	0	0	0	0	78.339	689	NaN	0.91397	NaN	NaN	NaN	NaN	NaN	NaN	332940000	173680000	159260000	108220000	47163000	61054000	139140000	78472000	60670000	85584000	48048000	37536000	0	0	0	0	0	0	0	0	0	0	0	0	0	0	0
ERG8	1	6	6	6	6	5	5	4	0	0	0	0	50.454	451	0.96753	0.93963	1.025	0.95823	NaN	NaN	NaN	NaN	7842300000	4531800000	3310500000	1630600000	933670000	696890000	1873000000	1184200000	688810000	2049400000	1211500000	837850000	2289300000	1202400000	1086900000	0	0	0	0	0	0	0	0	0	0	0	0
PKC1	1	2	2	2	1	1	0	0	0	0	1	0	131.48	1151	NaN	NaN	NaN	NaN	NaN	NaN	NaN	NaN	352060000	103760000	248310000	72150000	32236000	39914000	74895000	39062000	35833000	0	0	0	0	0	0	0	0	0	0	0	0	205020000	32460000	172560000	0	0	0
DBP1	1	2	2	2	1	0	1	0	0	0	0	0	67.916	617	NaN	NaN	NaN	NaN	NaN	NaN	NaN	NaN	16909000	8632900	8275800	15621000	7804700	7816100	0	0	0	1288000	828270	459710	0	0	0	0	0	0	0	0	0	0	0	0	0	0	0
CAD1	1	2	2	2	0	0	0	0	1	2	1	1	45.751	409	NaN	NaN	NaN	NaN	NaN	NaN	NaN	NaN	177520000	107070000	70443000	0	0	0	0	0	0	0	0	0	0	0	0	34509000	22872000	11637000	109830000	65830000	43997000	33181000	18372000	14809000	0	0	0
CLB2	1	1	1	1	1	0	1	0	0	0	0	0	56.246	491	2.1834	NaN	2.2486	NaN	NaN	NaN	NaN	NaN	1960200000	296120000	1664100000	834210000	148800000	685410000	0	0	0	1126000000	147320000	978660000	0	0	0	0	0	0	0	0	0	0	0	0	0	0	0
YSP3	1	1	1	1	0	0	0	0	1	1	1	0	52.089	478	NaN	NaN	NaN	NaN	NaN	NaN	NaN	NaN	68682000	23389000	45294000	0	0	0	0	0	0	0	0	0	0	0	0	16660000	7162400	9498000	19723000	5446600	14277000	32298000	10780000	21519000	0	0	0
TSR4	1	9	9	9	6	5	4	5	0	0	0	0	45.993	408	0.98812	0.98389	0.96088	0.9219	NaN	NaN	NaN	NaN	3080000000	1743500000	1336500000	1388600000	785950000	602620000	787700000	443380000	344320000	407630000	227780000	179850000	496070000	286360000	209710000	0	0	0	0	0	0	0	0	0	0	0	0
PUP1	1	4	4	4	4	4	3	3	0	0	0	0	28.268	261	1.044	1.0544	0.8988	1.1584	NaN	NaN	NaN	NaN	6499100000	3579000000	2920000000	3115200000	1777200000	1338000000	1829900000	981830000	848090000	1133000000	609070000	523970000	420970000	210950000	210020000	0	0	0	0	0	0	0	0	0	0	0	0
PTP1	1	3	3	3	2	2	2	2	0	0	0	1	38.868	335	0.98567	1.3705	1.3039	1.3528	NaN	NaN	NaN	NaN	779720000	404400000	375320000	180910000	122330000	58583000	221370000	107430000	113950000	191740000	93923000	97822000	185690000	80717000	104970000	0	0	0	0	0	0	0	0	0	0	0	0
ROX3	1	1	1	1	1	0	0	0	0	0	0	0	24.857	220	NaN	NaN	NaN	NaN	NaN	NaN	NaN	NaN	23463000	12971000	10492000	23463000	12971000	10492000	0	0	0	0	0	0	0	0	0	0	0	0	0	0	0	0	0	0	0	0	0
NAP1	1	9	9	9	6	5	6	6	1	2	4	3	47.884	417	0.95031	0.93744	1.004	0.97747	NaN	1.084	0.99247	1.0644	81285000000	45495000000	35790000000	35970000000	20577000000	15393000000	25186000000	13916000000	11270000000	11638000000	6417000000	5220600000	8264300000	4455000000	3809300000	1958800	1958800	0	17260000	8508900	8751100	106140000	61527000	44609000	101770000	57663000	44110000
CNB1	1	1	1	1	1	1	1	1	0	0	0	0	19.639	175	NaN	NaN	NaN	NaN	NaN	NaN	NaN	NaN	1550800000	834320000	716510000	337260000	194690000	142560000	376240000	209340000	166900000	394730000	203940000	190790000	442610000	226350000	216260000	0	0	0	0	0	0	0	0	0	0	0	0
RNA14	1	3	3	3	1	0	2	0	0	0	1	1	79.959	677	0.97304	NaN	NaN	NaN	NaN	NaN	NaN	NaN	255860000	158380000	97479000	203300000	119990000	83309000	0	0	0	19418000	19418000	0	0	0	0	0	0	0	0	0	0	19030000	9696600	9333100	14114000	9277100	4837000
RBK1	1	3	3	3	0	2	1	2	0	0	0	0	36.924	333	NaN	NaN	NaN	1.1394	NaN	NaN	NaN	NaN	464470000	290760000	173720000	0	0	0	42178000	21907000	20271000	74098000	39461000	34637000	348200000	229390000	118810000	0	0	0	0	0	0	0	0	0	0	0	0
SAT4	1	3	3	3	0	0	0	2	1	0	0	1	66.665	603	NaN	NaN	NaN	0.93068	NaN	NaN	NaN	NaN	75782000	45765000	30017000	0	0	0	0	0	0	0	0	0	55500000	35612000	19887000	4476200	3066500	1409700	0	0	0	0	0	0	15806000	7086300	8719500
MSH3	1	4	4	4	2	1	2	1	0	1	0	0	116.53	1018	0.84865	NaN	NaN	NaN	NaN	NaN	NaN	NaN	655470000	376210000	279270000	440030000	254390000	185640000	120320000	76034000	44286000	66655000	33176000	33479000	16914000	5633300	11281000	0	0	0	11553000	6975900	4577300	0	0	0	0	0	0
	1	1	1	1	0	0	0	0	0	1	1	1	20.173	174	NaN	NaN	NaN	NaN	NaN	NaN	0.93507	NaN	179110000	98656000	80458000	0	0	0	0	0	0	0	0	0	0	0	0	0	0	0	52604000	29441000	23163000	89173000	46533000	42641000	37336000	22682000	14654000
PUF4	1	14	14	14	4	5	3	2	2	3	5	3	97.797	888	0.97657	0.71371	1.021	0.61239	NaN	0.93548	0.94184	0.89101	4167800000	3379700000	788090000	2234600000	1842100000	392520000	920050000	785160000	134890000	576990000	484210000	92788000	30527000	19466000	11061000	19348000	11678000	7670100	126760000	87620000	39141000	151200000	85582000	65621000	108260000	63860000	44395000
STE50	1	2	2	2	1	1	2	1	0	0	0	0	38.97	346	1.2415	NaN	0.84065	NaN	NaN	NaN	NaN	NaN	475190000	283550000	191640000	149390000	84487000	64905000	141780000	76802000	64979000	153610000	98840000	54771000	30402000	23419000	6983000	0	0	0	0	0	0	0	0	0	0	0	0
SLM5	1	2	2	2	0	0	1	0	0	2	1	0	56.784	492	NaN	NaN	NaN	NaN	NaN	0.91795	NaN	NaN	121760000	60424000	61334000	0	0	0	0	0	0	78643000	35383000	43260000	0	0	0	0	0	0	30761000	17966000	12795000	12354000	7074600	5279100	0	0	0
CTR86	1	1	1	1	1	1	1	1	0	0	0	0	65.205	563	1.3292	1.1351	1.2065	1.0351	NaN	NaN	NaN	NaN	701990000	337300000	364690000	154430000	65976000	88451000	166840000	79769000	87074000	174600000	82475000	92124000	206120000	109080000	97037000	0	0	0	0	0	0	0	0	0	0	0	0
SNT1	1	3	3	3	1	2	0	2	0	0	0	0	138.4	1226	NaN	NaN	NaN	NaN	NaN	NaN	NaN	NaN	68130000	36159000	31971000	26297000	11416000	14881000	25781000	8691800	17090000	0	0	0	16052000	16052000	0	0	0	0	0	0	0	0	0	0	0	0	0
RRP43	1	2	2	2	2	1	0	1	0	0	0	0	44.011	394	0.91422	0.61502	NaN	NaN	NaN	NaN	NaN	NaN	1969800000	1091700000	878120000	1789300000	987860000	801470000	161970000	96646000	65324000	0	0	0	18493000	7158600	11334000	0	0	0	0	0	0	0	0	0	0	0	0
PHO87	1	4	4	4	1	1	1	1	2	1	2	1	102.54	923	NaN	NaN	0.78542	0.8476	NaN	NaN	NaN	NaN	655330000	389550000	265780000	162810000	95830000	66982000	190670000	101940000	88728000	162930000	105130000	57799000	80422000	43899000	36523000	13626000	10634000	2991900	7410100	6280700	1129400	37456000	25834000	11622000	0	0	0
	1	3	3	3	0	1	1	1	0	0	0	1	14.779	127	NaN	NaN	NaN	NaN	NaN	NaN	NaN	NaN	129530000	69414000	60115000	0	0	0	0	0	0	1838800	772000	1066800	102100000	54500000	47600000	0	0	0	0	0	0	0	0	0	25591000	14143000	11448000
OCA4	1	2	2	2	1	1	0	1	0	0	0	0	41.647	362	NaN	1.0764	NaN	NaN	NaN	NaN	NaN	NaN	260450000	146480000	113970000	164570000	98971000	65603000	66536000	29247000	37289000	0	0	0	29344000	18266000	11078000	0	0	0	0	0	0	0	0	0	0	0	0
RRP7	1	4	4	4	2	1	2	2	0	0	0	1	34.47	297	1.0968	NaN	1.059	1.1628	NaN	NaN	NaN	NaN	556420000	280220000	276200000	91921000	55705000	36216000	66456000	36171000	30285000	201270000	90450000	110820000	194480000	96467000	98009000	0	0	0	0	0	0	0	0	0	2300400	1429500	870980
LSB5	1	1	1	1	1	1	0	0	0	0	0	0	39.872	354	NaN	NaN	NaN	NaN	NaN	NaN	NaN	NaN	98109000	58553000	39556000	49048000	30316000	18732000	49061000	28236000	20825000	0	0	0	0	0	0	0	0	0	0	0	0	0	0	0	0	0	0
TRX3	1	5	5	5	2	2	2	2	1	2	1	0	14.432	127	0.85179	1.037	1.0674	1.1347	NaN	1.0591	NaN	NaN	1849100000	1031600000	817440000	377870000	214520000	163350000	471620000	259010000	212610000	480090000	273300000	206790000	468430000	250790000	217640000	18252000	13261000	4991400	29075000	18886000	10188000	3751500	1875400	1876000	0	0	0
GRX1	1	2	2	2	2	1	2	1	0	0	0	0	12.38	110	1.0685	1.2592	0.58532	0.5582	NaN	NaN	NaN	NaN	1107400000	640750000	466640000	743280000	439850000	303430000	285670000	140800000	144870000	40147000	30412000	9735500	38283000	29687000	8596500	0	0	0	0	0	0	0	0	0	0	0	0
AGP1	1	2	2	2	0	0	0	1	1	0	0	0	69.671	633	NaN	NaN	NaN	NaN	NaN	NaN	NaN	NaN	19582000	17365000	2217100	0	0	0	0	0	0	0	0	0	0	0	0	19582000	17365000	2217100	0	0	0	0	0	0	0	0	0
RSA4	1	8	8	8	5	5	7	7	1	1	0	1	57.025	515	0.85283	0.92661	0.96112	0.95014	NaN	NaN	NaN	NaN	15372000000	8131600000	7240200000	7107800000	3717100000	3390700000	3298800000	1821700000	1477100000	2903700000	1559500000	1344100000	1952700000	962110000	990550000	55218000	36842000	18376000	30538000	21370000	9168100	0	0	0	23152000	12945000	10207000
TY2A-C;TY2A-DR1;TY2A-DR3;TY2A-GR2;TY2A-F;TY2A-LR1;TY2A-B;TY2A-OR1;TY2A-OR2;TY2A-LR2;TY2A-DR2	11	12	1	1	5	4	4	3	7	5	5	6	49.841	438	NaN	NaN	NaN	NaN	NaN	NaN	NaN	NaN	0	0	0	0	0	0	0	0	0	0	0	0	0	0	0	0	0	0	0	0	0	0	0	0	0	0	0
BOS1	1	3	3	3	1	1	1	1	1	1	3	3	27.5	244	NaN	1.1977	NaN	NaN	NaN	NaN	0.82408	1.1875	1976100000	1069600000	906460000	684140000	362470000	321670000	458510000	230690000	227820000	0	0	0	0	0	0	32014000	24766000	7247200	16351000	8507300	7843800	331560000	202620000	128940000	453540000	240600000	212940000
USO1	1	27	27	27	17	10	11	11	0	0	0	0	206.45	1790	0.95219	0.95133	1.1401	0.94243	NaN	NaN	NaN	NaN	6635400000	4331700000	2303700000	2336600000	1638800000	697810000	956790000	646580000	310210000	1119300000	501770000	617580000	2222700000	1544600000	678110000	0	0	0	0	0	0	0	0	0	0	0	0
RPC53	1	4	4	4	2	0	0	0	1	0	3	4	46.667	422	0.80822	NaN	NaN	NaN	NaN	NaN	1.1057	0.87879	2069000000	1183200000	885790000	1752400000	996900000	755530000	0	0	0	0	0	0	0	0	0	3144400	2021100	1123300	0	0	0	76179000	46494000	29686000	237210000	137770000	99449000
PUP3	1	2	2	2	1	1	0	1	0	0	1	0	22.605	205	NaN	0.79105	NaN	NaN	NaN	NaN	NaN	NaN	127460000	76979000	50485000	49623000	30610000	19014000	77841000	46369000	31472000	0	0	0	0	0	0	0	0	0	0	0	0	0	0	0	0	0	0
RAD51	1	3	3	3	3	2	1	0	0	0	0	0	42.963	400	1.2119	0.77294	NaN	NaN	NaN	NaN	NaN	NaN	1947900000	1238500000	709410000	1662700000	1066200000	596560000	285140000	172290000	112850000	0	0	0	0	0	0	0	0	0	0	0	0	0	0	0	0	0	0
SGF29	1	2	2	2	2	1	1	0	0	0	0	0	29.381	259	1.0144	NaN	NaN	NaN	NaN	NaN	NaN	NaN	167140000	97283000	69859000	125310000	67103000	58205000	41835000	30181000	11654000	0	0	0	0	0	0	0	0	0	0	0	0	0	0	0	0	0	0
GBP2	1	4	4	4	2	2	0	2	1	0	0	1	48.728	427	0.86937	1.2612	NaN	1.063	NaN	NaN	NaN	NaN	813530000	374800000	438730000	194590000	113600000	80986000	283330000	111450000	171870000	0	0	0	313980000	138590000	175390000	0	0	0	0	0	0	0	0	0	21634000	11151000	10483000
BUD3	1	11	11	11	6	5	7	6	1	0	0	2	184.72	1636	0.98797	0.9009	0.9756	0.92479	NaN	NaN	NaN	0.74331	2378100000	1292200000	1085900000	732170000	384220000	347950000	620310000	367990000	252310000	618120000	322840000	295280000	370830000	190480000	180350000	3248800	3248800	0	0	0	0	0	0	0	33456000	23409000	10047000
DCC1	1	1	1	1	0	0	0	0	0	0	1	1	44.073	380	NaN	NaN	NaN	NaN	NaN	NaN	NaN	NaN	15694000	8479500	7214200	0	0	0	0	0	0	0	0	0	0	0	0	0	0	0	0	0	0	8925200	4905400	4019900	6768500	3574100	3194400
MXR2	1	2	2	2	2	1	0	0	0	0	0	0	19.279	168	1.0332	1.031	NaN	NaN	NaN	NaN	NaN	NaN	699990000	377580000	322410000	425380000	234090000	191290000	274610000	143490000	131110000	0	0	0	0	0	0	0	0	0	0	0	0	0	0	0	0	0	0
POF1	1	4	4	4	0	1	0	0	0	0	1	2	29.673	258	NaN	NaN	NaN	NaN	NaN	NaN	NaN	NaN	100820000	57487000	43331000	0	0	0	74881000	40328000	34553000	0	0	0	0	0	0	0	0	0	0	0	0	14578000	11071000	3506500	11360000	6088500	5271300
LRE1	1	1	1	1	1	1	0	0	0	0	0	0	64.791	583	NaN	NaN	NaN	NaN	NaN	NaN	NaN	NaN	75818000	44831000	30988000	34856000	20379000	14477000	40963000	24452000	16511000	0	0	0	0	0	0	0	0	0	0	0	0	0	0	0	0	0	0
SPB1	1	11	11	11	6	7	5	5	0	0	1	2	96.484	841	0.92454	0.88655	0.84436	0.91275	NaN	NaN	NaN	0.8957	4932900000	2830900000	2102000000	1710600000	995180000	715440000	1442000000	817610000	624430000	1052100000	576820000	475260000	716620000	433960000	282660000	0	0	0	0	0	0	1630500	1184500	445960	9879800	6136100	3743700
KAR4	1	2	2	2	0	0	1	0	0	0	1	0	38.672	335	NaN	NaN	NaN	NaN	NaN	NaN	NaN	NaN	177540000	106190000	71345000	0	0	0	0	0	0	147180000	83811000	63372000	0	0	0	0	0	0	0	0	0	30354000	22381000	7973200	0	0	0
MRC1	1	2	2	2	2	0	0	1	0	0	0	0	124.32	1096	0.90553	NaN	NaN	NaN	NaN	NaN	NaN	NaN	93064000	61923000	31141000	52547000	33825000	18722000	0	0	0	0	0	0	40517000	28098000	12419000	0	0	0	0	0	0	0	0	0	0	0	0
STP22	1	1	1	1	1	1	1	0	0	0	0	0	43.33	385	NaN	NaN	NaN	NaN	NaN	NaN	NaN	NaN	282760000	163390000	119370000	121530000	78385000	43145000	88254000	46388000	41866000	72978000	38619000	34358000	0	0	0	0	0	0	0	0	0	0	0	0	0	0	0
ADY2	1	1	1	1	0	0	0	0	0	1	0	0	30.726	283	NaN	NaN	NaN	NaN	NaN	NaN	NaN	NaN	3440800	3440800	0	0	0	0	0	0	0	0	0	0	0	0	0	0	0	0	3440800	3440800	0	0	0	0	0	0	0
	1	9	9	9	6	2	1	2	1	2	4	4	33.593	290	1.0587	1.282	NaN	NaN	NaN	0.81458	0.97483	0.9992	3667400000	2047600000	1619700000	2932900000	1637100000	1295800000	191220000	77974000	113240000	139500000	85596000	53901000	188150000	112430000	75725000	16698000	11723000	4975200	25234000	16619000	8615000	52602000	30271000	22331000	121100000	75978000	45123000
HSP30	1	1	1	1	0	0	0	0	1	1	1	1	37.044	332	NaN	NaN	NaN	NaN	NaN	NaN	NaN	NaN	0	0	0	0	0	0	0	0	0	0	0	0	0	0	0	0	0	0	0	0	0	0	0	0	0	0	0
IMG1	1	3	3	3	0	0	0	0	0	1	3	1	19.393	169	NaN	NaN	NaN	NaN	NaN	NaN	1.0021	NaN	165810000	96197000	69616000	0	0	0	0	0	0	0	0	0	0	0	0	0	0	0	3361400	1828400	1533000	123790000	77099000	46686000	38666000	17269000	21397000
BUD23	1	4	4	4	3	3	2	1	0	0	0	0	30.742	275	0.87623	0.78134	0.70737	NaN	NaN	NaN	NaN	NaN	2751500000	1567100000	1184400000	924780000	561550000	363230000	1032500000	575660000	456850000	459380000	247570000	211810000	334830000	182320000	152510000	0	0	0	0	0	0	0	0	0	0	0	0
	1	2	2	2	2	2	2	2	0	0	0	0	24.694	222	0.98966	1.0587	1.0289	0.99225	NaN	NaN	NaN	NaN	6375400000	3596200000	2779200000	2226100000	1319300000	906780000	1740500000	921900000	818610000	1556100000	826870000	729200000	852770000	528200000	324570000	0	0	0	0	0	0	0	0	0	0	0	0
RSC6	1	4	4	4	1	0	0	0	0	2	0	1	54.164	483	NaN	NaN	NaN	NaN	NaN	2.0942	NaN	NaN	237400000	135370000	102030000	202520000	117130000	85390000	0	0	0	0	0	0	0	0	0	0	0	0	14801000	6668300	8132500	0	0	0	20074000	11568000	8506400
YIH1	1	1	1	1	1	0	0	0	0	0	0	0	29.017	258	NaN	NaN	NaN	NaN	NaN	NaN	NaN	NaN	129610000	84089000	45523000	129610000	84089000	45523000	0	0	0	0	0	0	0	0	0	0	0	0	0	0	0	0	0	0	0	0	0
IMG2	1	5	5	5	2	2	2	2	1	2	2	3	16.38	146	0.99793	1.2218	NaN	0.88047	NaN	0.9087	0.97786	0.9785	846600000	482190000	364410000	185250000	95328000	89917000	144490000	69417000	75071000	86561000	44818000	41743000	131180000	83211000	47972000	17934000	12915000	5019000	25028000	14901000	10127000	105100000	64222000	40878000	151060000	97378000	53678000
CSM1	1	3	3	3	1	1	0	1	0	0	0	1	21.751	190	NaN	NaN	NaN	NaN	NaN	NaN	NaN	NaN	542430000	294300000	248120000	390840000	208940000	181890000	0	0	0	0	0	0	148580000	83514000	65061000	0	0	0	0	0	0	0	0	0	3016500	1849000	1167600
	1	4	4	4	2	2	3	2	0	0	0	0	20.703	182	NaN	1.1408	1.1187	NaN	NaN	NaN	NaN	NaN	606990000	305900000	301080000	136900000	74497000	62407000	193970000	106450000	87522000	240530000	108530000	132000000	35580000	16425000	19155000	0	0	0	0	0	0	0	0	0	0	0	0
SPB4	1	5	5	5	3	3	3	4	0	0	1	0	69.421	606	0.89869	0.98858	1.0507	0.98997	NaN	NaN	NaN	NaN	809240000	450420000	358820000	366490000	201200000	165300000	117650000	62833000	54821000	106060000	54396000	51664000	194950000	114470000	80481000	0	0	0	0	0	0	24086000	17525000	6561400	0	0	0
MSH1	1	4	4	4	2	1	0	0	1	2	2	2	109.41	959	1.0112	NaN	NaN	NaN	NaN	NaN	0.65859	0.70971	233550000	152950000	80600000	125330000	80569000	44763000	11519000	7199500	4319800	0	0	0	0	0	0	8446200	6550300	1896000	9435400	6981600	2453800	21750000	14786000	6964300	57067000	36864000	20203000
MSH2	1	5	5	5	4	4	3	3	0	0	0	0	108.88	964	1.1406	0.99082	0.81176	0.95912	NaN	NaN	NaN	NaN	3155400000	2231500000	923870000	905680000	584550000	321130000	1028600000	736830000	291760000	770590000	603460000	167130000	450520000	306670000	143850000	0	0	0	0	0	0	0	0	0	0	0	0
PDC6	1	3	1	1	1	0	0	1	1	1	2	1	61.58	563	NaN	NaN	NaN	NaN	NaN	NaN	NaN	NaN	9818200	6606600	3211600	0	0	0	0	0	0	0	0	0	0	0	0	0	0	0	0	0	0	9818200	6606600	3211600	0	0	0
ADK2	1	1	1	1	0	0	0	0	0	1	1	1	25.194	225	NaN	NaN	NaN	NaN	NaN	NaN	NaN	NaN	0	0	0	0	0	0	0	0	0	0	0	0	0	0	0	0	0	0	0	0	0	0	0	0	0	0	0
RFA2	1	3	3	3	2	1	1	1	0	0	1	0	29.936	273	1.126	0.95456	NaN	NaN	NaN	NaN	NaN	NaN	860400000	506810000	353590000	181450000	104810000	76636000	112680000	65071000	47606000	82891000	37772000	45120000	73582000	43488000	30095000	0	0	0	0	0	0	409800000	255670000	154130000	0	0	0
RFA3	1	2	2	2	2	1	1	1	0	0	0	0	13.816	122	1.141	NaN	NaN	NaN	NaN	NaN	NaN	NaN	1215300000	658850000	556440000	361000000	194980000	166020000	307930000	163690000	144240000	350610000	195750000	154860000	195750000	104430000	91322000	0	0	0	0	0	0	0	0	0	0	0	0
RAD27	1	5	5	5	2	3	2	2	1	1	0	0	43.279	382	1.0195	0.83024	0.97236	0.83142	NaN	NaN	NaN	NaN	1448700000	824820000	623880000	365010000	215120000	149890000	481880000	276380000	205500000	256700000	131520000	125180000	331850000	193890000	137960000	9590200	6168100	3422100	3669000	1742500	1926500	0	0	0	0	0	0
URK1	1	4	4	4	2	2	1	0	0	0	0	0	56.295	501	1.1322	0.7394	NaN	NaN	NaN	NaN	NaN	NaN	303030000	152630000	150390000	176020000	77819000	98204000	70760000	42342000	28418000	56248000	32474000	23773000	0	0	0	0	0	0	0	0	0	0	0	0	0	0	0
ADE1	1	4	4	4	4	2	2	2	0	0	0	0	34.603	306	1.1174	1.0869	1.1063	0.99281	NaN	NaN	NaN	NaN	4430700000	2436300000	1994400000	1352000000	744710000	607270000	891500000	487990000	403520000	1248500000	685660000	562810000	938750000	517940000	420810000	0	0	0	0	0	0	0	0	0	0	0	0
BUD14	1	4	4	4	2	4	3	3	0	0	0	0	78.981	709	NaN	1.1475	0.85434	0.92864	NaN	NaN	NaN	NaN	3509300000	1595800000	1913500000	66057000	33351000	32706000	1168800000	568280000	600470000	1166800000	543140000	623640000	1107700000	451010000	656710000	0	0	0	0	0	0	0	0	0	0	0	0
COQ3	1	3	3	3	0	0	0	0	1	1	3	3	36.33	312	NaN	NaN	NaN	NaN	NaN	NaN	0.96689	0.92269	664990000	405350000	259640000	0	0	0	0	0	0	0	0	0	0	0	0	19260000	14173000	5087000	23771000	16160000	7611300	349620000	212190000	137430000	272340000	162820000	109510000
SPT5	1	19	19	19	16	14	10	8	1	1	1	2	115.65	1063	0.89988	1.0281	0.95653	0.9731	NaN	NaN	NaN	0.83289	21057000000	11841000000	9216100000	8951500000	5232200000	3719400000	5686900000	3108300000	2578600000	4077000000	2211100000	1866000000	2193200000	1202600000	990610000	65427000	45462000	19965000	32177000	11719000	20458000	24857000	13625000	11232000	25757000	15768000	9989300
MIG1	1	1	1	1	1	0	0	0	0	0	0	0	55.531	504	NaN	NaN	NaN	NaN	NaN	NaN	NaN	NaN	7625900	4772400	2853400	7625900	4772400	2853400	0	0	0	0	0	0	0	0	0	0	0	0	0	0	0	0	0	0	0	0	0
CIN8	1	2	2	2	1	0	1	1	1	0	1	0	113.31	1000	NaN	NaN	NaN	NaN	NaN	NaN	NaN	NaN	303960000	238990000	64978000	142080000	142080000	0	0	0	0	0	0	0	0	0	0	61988000	39312000	22676000	0	0	0	99898000	57596000	42302000	0	0	0
RPC19	1	4	4	4	3	4	3	3	0	0	0	0	16.151	142	0.90734	0.93535	0.91863	0.968	NaN	NaN	NaN	NaN	12421000000	7010500000	5410600000	2627500000	1518200000	1109400000	3404500000	1856300000	1548200000	2929600000	1699600000	1230000000	3459500000	1936400000	1523100000	0	0	0	0	0	0	0	0	0	0	0	0
PRP45	1	5	5	5	1	1	1	2	0	0	0	0	42.482	379	NaN	NaN	NaN	0.91619	NaN	NaN	NaN	NaN	438710000	235960000	202750000	159880000	66844000	93032000	73296000	31551000	41744000	70120000	63179000	6941300	135420000	74387000	61031000	0	0	0	0	0	0	0	0	0	0	0	0
URA1	1	7	7	7	4	2	2	2	1	1	4	5	34.801	314	0.91289	1.1295	1.0653	1.0141	NaN	0.51414	0.97857	0.89938	8157300000	4589200000	3568100000	3082300000	1863500000	1218800000	959190000	505370000	453810000	2686600000	1428900000	1257700000	1266900000	689910000	576980000	13503000	8886900	4615700	17633000	13568000	4064300	61889000	38407000	23482000	69252000	40667000	28584000
OXP1	1	6	6	6	4	3	2	1	0	0	1	1	140.43	1286	1.0527	1.0754	0.98577	0.71861	NaN	NaN	NaN	NaN	3469700000	1907300000	1562400000	1010000000	541890000	468070000	893080000	483790000	409290000	1140800000	630850000	509950000	330600000	195950000	134650000	0	0	0	0	0	0	85731000	48644000	37087000	9522700	6174800	3347900
URA7	1	10	10	10	7	6	6	5	1	1	3	3	64.71	579	0.9606	0.95571	0.90092	0.93171	NaN	NaN	1.0552	1.3535	14119000000	7835100000	6284200000	5165300000	2941300000	2224000000	4140900000	2278100000	1862800000	2501700000	1380300000	1121400000	1943800000	1075800000	868030000	7782500	5800000	1982500	5959700	3910700	2049000	229280000	91030000	138250000	124590000	58864000	65721000
YJU2	1	2	2	2	0	1	1	0	0	0	0	0	32.312	278	NaN	NaN	NaN	NaN	NaN	NaN	NaN	NaN	94708000	54158000	40550000	0	0	0	30010000	16500000	13509000	64699000	37658000	27041000	0	0	0	0	0	0	0	0	0	0	0	0	0	0	0
SBA1	1	3	3	3	3	3	3	3	0	0	0	0	24.081	216	0.98548	1.1112	1.0997	1.1084	NaN	NaN	NaN	NaN	10254000000	5333500000	4920500000	3090600000	1753300000	1337300000	2848400000	1349700000	1498700000	2353300000	1232900000	1120400000	1961800000	997590000	964170000	0	0	0	0	0	0	0	0	0	0	0	0
MRP17	1	2	2	2	1	1	1	0	0	0	1	0	15.02	131	NaN	NaN	NaN	NaN	NaN	NaN	0.83606	NaN	94922000	57200000	37721000	0	0	0	0	0	0	0	0	0	0	0	0	0	0	0	0	0	0	94922000	57200000	37721000	0	0	0
HEM3	1	8	8	8	7	5	4	4	0	0	0	1	36.674	327	0.92368	0.94428	1.0162	0.93975	NaN	NaN	NaN	NaN	5038500000	2747000000	2291500000	2369400000	1303700000	1065700000	1358200000	741340000	616810000	798890000	437100000	361800000	506370000	261710000	244660000	0	0	0	0	0	0	0	0	0	5652200	3196600	2455600
EHD3	1	3	3	3	0	0	0	0	1	2	1	1	56.288	500	NaN	NaN	NaN	NaN	NaN	1.2102	1.2796	NaN	452000000	254180000	197820000	0	0	0	0	0	0	0	0	0	0	0	0	11217000	7886200	3330600	24495000	14552000	9943000	346690000	193690000	152990000	69603000	38053000	31550000
SUA7	1	6	6	6	5	4	5	5	0	0	1	0	38.2	345	0.93689	0.89098	0.98828	0.96847	NaN	NaN	NaN	NaN	2412300000	1369400000	1042800000	918080000	529850000	388230000	383550000	224910000	158640000	627770000	341070000	286700000	476140000	271190000	204960000	0	0	0	0	0	0	6751200	2426300	4325000	0	0	0
BRF1	1	4	4	4	2	2	2	0	0	1	1	0	66.906	596	1.0411	NaN	NaN	NaN	NaN	NaN	NaN	NaN	586880000	357630000	229240000	211130000	112640000	98491000	158650000	101810000	56847000	88452000	65659000	22793000	0	0	0	0	0	0	46369000	29415000	16954000	82271000	48114000	34157000	0	0	0
HRR25	1	3	3	3	2	2	2	1	1	1	2	2	57.339	494	0.97996	0.95969	0.94638	1.0235	NaN	0.97722	1.0158	0.8262	1627000000	943160000	683830000	505500000	296630000	208870000	592650000	351600000	241060000	355330000	196270000	159060000	47917000	25516000	22401000	3941200	1872100	2069100	11264000	6917000	4347500	58513000	35172000	23342000	51875000	29195000	22680000
PEX4	1	2	2	2	0	0	0	0	1	1	1	2	21.118	183	NaN	NaN	NaN	NaN	NaN	NaN	NaN	NaN	106440000	54473000	51965000	0	0	0	0	0	0	0	0	0	0	0	0	3280200	1932900	1347300	2588900	991250	1597600	61678000	30571000	31107000	38891000	20978000	17913000
BEM1	1	7	7	7	5	2	2	4	0	0	0	1	61.605	551	0.99325	0.98411	0.9782	0.9166	NaN	NaN	NaN	NaN	1400700000	778580000	622130000	633210000	356700000	276510000	192780000	107340000	85435000	223330000	134100000	89226000	278590000	139310000	139270000	0	0	0	0	0	0	0	0	0	72802000	41122000	31680000
PAP1	1	7	7	7	4	2	4	3	1	1	0	0	64.551	568	0.91375	0.91168	0.96916	1.6239	NaN	NaN	NaN	NaN	5222800000	3725600000	1497100000	2526300000	1828600000	697730000	383210000	242520000	140690000	1830200000	1374800000	455400000	473240000	273010000	200230000	8890700	6282200	2608500	868150	423070	445080	0	0	0	0	0	0
MCM2	1	2	2	2	2	1	1	1	0	0	0	0	98.778	868	1.0307	NaN	NaN	NaN	NaN	NaN	NaN	NaN	518380000	297340000	221040000	260980000	144340000	116650000	37722000	23495000	14227000	156170000	91591000	64575000	63513000	37923000	25590000	0	0	0	0	0	0	0	0	0	0	0	0
SEC65	1	9	9	9	4	3	4	4	0	0	4	3	31.169	273	0.89403	0.91568	0.97487	0.91287	NaN	NaN	0.92973	1.0054	7293400000	4078000000	3215400000	1815000000	1021400000	793540000	1612600000	904260000	708390000	1459300000	781680000	677590000	1771900000	995010000	776840000	0	0	0	0	0	0	391970000	238310000	153670000	242720000	137350000	105370000
MCM5	1	2	2	2	2	0	0	0	0	0	0	0	86.41	775	NaN	NaN	NaN	NaN	NaN	NaN	NaN	NaN	176000000	42629000	133370000	176000000	42629000	133370000	0	0	0	0	0	0	0	0	0	0	0	0	0	0	0	0	0	0	0	0	0
RIF1	1	4	4	4	1	2	0	0	1	0	1	0	217.93	1916	NaN	0.98538	NaN	NaN	NaN	NaN	0.64282	NaN	290340000	170910000	119430000	94393000	60002000	34391000	96848000	51034000	45814000	0	0	0	0	0	0	41227000	22671000	18557000	0	0	0	57872000	37203000	20669000	0	0	0
RAM2	1	1	1	1	1	1	1	0	0	0	0	0	37.507	316	NaN	1.0876	1.0424	NaN	NaN	NaN	NaN	NaN	757540000	374690000	382860000	252290000	146000000	106300000	359980000	163460000	196530000	145260000	65232000	80031000	0	0	0	0	0	0	0	0	0	0	0	0	0	0	0
PRE2	1	2	2	2	2	2	2	1	0	0	0	0	31.636	287	1.1656	1.0736	1.152	NaN	NaN	NaN	NaN	NaN	3381600000	1752400000	1629300000	1199900000	628440000	571490000	874290000	445900000	428390000	917930000	452750000	465180000	389470000	225270000	164200000	0	0	0	0	0	0	0	0	0	0	0	0
PRE4	1	3	3	3	2	3	3	3	0	0	0	0	29.443	266	1.1487	1.038	1.0195	1.0212	NaN	NaN	NaN	NaN	6379600000	3087900000	3291700000	1606500000	771320000	835150000	2131600000	902750000	1228900000	1362700000	746950000	615710000	1278900000	666890000	611960000	0	0	0	0	0	0	0	0	0	0	0	0
MCM4	1	6	6	6	2	1	1	1	0	1	1	3	105	933	0.96975	NaN	6.6067	NaN	NaN	NaN	NaN	0.93128	1134800000	550180000	584620000	872000000	489310000	382690000	48523000	4863200	43660000	99604000	16364000	83240000	58833000	8434500	50399000	0	0	0	8163400	4514900	3648500	7756000	1423400	6332600	39919000	25266000	14653000
GPI10	1	1	1	1	1	0	0	0	0	0	0	1	72.565	616	NaN	NaN	NaN	NaN	NaN	NaN	NaN	NaN	0	0	0	0	0	0	0	0	0	0	0	0	0	0	0	0	0	0	0	0	0	0	0	0	0	0	0
CRM1	1	8	8	8	6	5	5	4	0	1	0	0	124.1	1084	1.0048	0.98793	1.0159	1.1202	NaN	NaN	NaN	NaN	13881000000	7553700000	6327000000	4080800000	2232900000	1848000000	3905100000	2107800000	1797200000	2804000000	1535300000	1268700000	3090900000	1677700000	1413200000	0	0	0	0	0	0	0	0	0	0	0	0
SNC1	1	3	2	2	3	2	2	2	2	3	3	3	13.201	117	1.4925	NaN	NaN	NaN	NaN	0.65058	1.1613	1.107	4382300000	2535100000	1847100000	792550000	415450000	377100000	700140000	386220000	313920000	667780000	406720000	261050000	584500000	350230000	234270000	13718000	8979200	4738300	60453000	44081000	16372000	670250000	410650000	259600000	892880000	512800000	380070000
DEG1	1	3	3	3	2	0	2	2	0	0	0	0	50.888	442	0.86734	NaN	1.0794	NaN	NaN	NaN	NaN	NaN	310650000	179900000	130750000	135720000	72089000	63628000	0	0	0	76901000	45293000	31608000	98033000	62521000	35512000	0	0	0	0	0	0	0	0	0	0	0	0
MRPL9	1	2	2	2	1	0	1	0	0	0	1	2	29.79	269	NaN	NaN	NaN	NaN	NaN	NaN	NaN	NaN	213580000	69882000	143700000	139550000	35802000	103750000	0	0	0	0	0	0	0	0	0	0	0	0	0	0	0	24985000	12367000	12617000	49051000	21713000	27338000
PSK1	1	3	3	3	2	1	0	1	0	0	0	0	152.33	1356	NaN	NaN	NaN	NaN	NaN	NaN	NaN	NaN	425800000	221850000	203950000	356090000	187330000	168760000	0	0	0	0	0	0	69706000	34514000	35192000	0	0	0	0	0	0	0	0	0	0	0	0
SYN8	1	4	4	4	0	1	0	0	1	1	3	2	29.048	255	NaN	NaN	NaN	NaN	NaN	NaN	0.79945	0.90542	209380000	116520000	92862000	0	0	0	46582000	16977000	29605000	0	0	0	0	0	0	0	0	0	8481000	4594200	3886800	69366000	47237000	22129000	84950000	47708000	37241000
NTG1	1	1	1	1	1	0	0	0	0	0	0	0	45.576	399	NaN	NaN	NaN	NaN	NaN	NaN	NaN	NaN	70694000	45612000	25082000	70694000	45612000	25082000	0	0	0	0	0	0	0	0	0	0	0	0	0	0	0	0	0	0	0	0	0
FUN30	1	7	7	7	4	4	4	2	0	0	0	0	128.51	1131	1.0135	0.89915	0.80351	0.88256	NaN	NaN	NaN	NaN	2088900000	1223900000	864990000	687970000	391890000	296080000	562780000	327270000	235510000	481330000	292040000	189290000	356830000	212730000	144100000	0	0	0	0	0	0	0	0	0	0	0	0
TPD3	1	8	8	8	5	5	4	3	1	2	7	5	70.907	635	1.0674	1.0128	0.98208	0.91359	NaN	1.1985	1.1604	1.0991	10750000000	5736400000	5013900000	2843100000	1439300000	1403800000	2784500000	1507400000	1277100000	2962400000	1610400000	1352000000	1838300000	1007900000	830450000	17654000	8021900	9631600	36281000	21582000	14698000	170980000	85324000	85652000	97170000	56585000	40585000
CCR4	1	13	13	13	5	5	3	2	1	1	2	5	94.669	837	0.73639	0.68622	0.94635	0.98523	NaN	NaN	1.2045	0.97259	3598000000	2650600000	947360000	1281900000	1059800000	222070000	1423500000	1111900000	311640000	492640000	239940000	252710000	230320000	131450000	98879000	5774900	3345600	2429200	5242300	3670400	1571900	58238000	34536000	23703000	100370000	66005000	34364000
DEP1	1	1	1	1	1	1	1	1	0	0	0	0	46.977	405	NaN	NaN	NaN	NaN	NaN	NaN	NaN	NaN	828760000	452280000	376490000	218940000	137410000	81538000	383430000	199680000	183750000	226390000	115190000	111200000	0	0	0	0	0	0	0	0	0	0	0	0	0	0	0
HSP104	1	30	30	30	14	12	7	7	2	3	16	15	102.03	908	1.1753	1.2919	1.2616	1.3067	NaN	1.5833	1.1653	0.95228	55966000000	27308000000	28658000000	19596000000	10344000000	9251900000	16781000000	7062400000	9718100000	10157000000	5132800000	5024400000	8068500000	3972400000	4096100000	16900000	12039000	4860600	45941000	26041000	19900000	644140000	382200000	261940000	657620000	376690000	280920000
TPS2	1	11	11	11	8	5	4	5	1	0	2	2	102.98	896	1.2728	1.3985	1.5134	1.3875	NaN	NaN	1.253	1.3996	17969000000	9263100000	8706000000	2912500000	1445600000	1466900000	2966000000	1300800000	1665200000	3784600000	1741400000	2043200000	8176600000	4703800000	3472800000	30065000	19774000	10291000	0	0	0	11043000	5889000	5153600	88263000	45893000	42371000
OCH1	1	6	6	6	0	0	1	2	0	1	3	4	55.155	480	NaN	NaN	NaN	1.2992	NaN	NaN	0.81264	1.0284	900140000	470750000	429390000	0	0	0	0	0	0	122190000	65685000	56505000	652900000	330680000	322210000	0	0	0	32954000	22658000	10296000	40349000	25794000	14555000	51743000	25924000	25819000
ACB1	1	5	5	5	4	4	4	3	0	0	0	0	10.061	87	1.0801	1.1626	1.1876	1.2904	NaN	NaN	NaN	NaN	22992000000	12134000000	10858000000	8665700000	4825000000	3840700000	6400200000	3370300000	3029800000	4532600000	2257700000	2274900000	3393700000	1680800000	1712900000	0	0	0	0	0	0	0	0	0	0	0	0
MLF3	1	1	1	1	1	1	1	1	0	0	0	0	49.21	452	NaN	NaN	NaN	NaN	NaN	NaN	NaN	NaN	739410000	425080000	314340000	197630000	119060000	78572000	171510000	100800000	70712000	173510000	102910000	70600000	196750000	102300000	94453000	0	0	0	0	0	0	0	0	0	0	0	0
MSK1	1	3	3	3	0	1	0	0	0	1	1	0	66.127	576	NaN	NaN	NaN	NaN	NaN	NaN	NaN	NaN	816690000	440810000	375880000	0	0	0	801300000	435030000	366270000	0	0	0	0	0	0	0	0	0	10988000	3529800	7458200	4403300	2247300	2156000	0	0	0
ARO7	1	3	3	3	3	3	1	2	0	0	0	0	29.747	256	1.0192	1.0694	NaN	1.048	NaN	NaN	NaN	NaN	2500100000	1349200000	1150900000	671310000	376510000	294800000	794090000	427900000	366190000	583230000	318200000	265030000	451510000	226610000	224890000	0	0	0	0	0	0	0	0	0	0	0	0
MET22	1	7	7	7	6	4	5	3	0	0	3	1	39.149	357	1.077	1.1773	1.1491	1.9635	NaN	NaN	0.93085	NaN	2801100000	1494500000	1306700000	1382300000	760480000	621800000	558140000	282840000	275300000	368200000	192680000	175530000	407850000	207730000	200110000	0	0	0	0	0	0	80401000	47639000	32762000	4242100	3087800	1154300
GUT1	1	1	1	1	0	0	0	1	0	0	0	0	79.823	709	NaN	NaN	NaN	NaN	NaN	NaN	NaN	NaN	10704000	0	10704000	0	0	0	0	0	0	0	0	0	10704000	0	10704000	0	0	0	0	0	0	0	0	0	0	0	0
PRO3	1	10	10	10	8	8	7	8	0	1	1	3	30.131	286	0.92335	1.0407	0.97549	1.0612	NaN	NaN	NaN	1.1131	32870000000	18174000000	14696000000	19291000000	10847000000	8443900000	5839500000	3258300000	2581100000	4176000000	2162300000	2013700000	3463600000	1857500000	1606100000	0	0	0	11198000	7716900	3480700	42453000	15403000	27051000	46414000	25480000	20934000
PRO1	1	8	8	8	5	5	4	5	0	0	0	1	47.162	428	0.98818	1.0749	1.1644	1.0915	NaN	NaN	NaN	NaN	7546400000	4114600000	3431800000	2628400000	1509900000	1118500000	2182900000	1163900000	1019000000	1239300000	675920000	563340000	1485500000	760130000	725400000	0	0	0	0	0	0	0	0	0	10321000	4818100	5502900
GLN1	1	5	5	5	2	0	1	3	1	0	1	2	41.766	370	0.91239	NaN	NaN	0.92637	NaN	NaN	0.85041	NaN	2581200000	1439100000	1142100000	1150000000	629810000	520150000	0	0	0	111800000	61162000	50640000	1232900000	695620000	537330000	813240	532350	280890	0	0	0	50895000	31802000	19093000	34795000	20154000	14641000
PYC2	1	10	10	2	8	5	4	3	0	0	1	1	130.17	1180	0.97128	1.1398	0.99149	0.9563	NaN	NaN	NaN	NaN	18368000000	9908400000	8460000000	11630000000	6306600000	5323300000	1816500000	933280000	883240000	3596100000	1931600000	1664600000	1286700000	711310000	575370000	0	0	0	0	0	0	22868000	15182000	7686000	16300000	10454000	5846200
MOT1	1	10	10	10	5	1	0	3	0	1	0	1	209.97	1867	0.92312	NaN	NaN	0.67801	NaN	NaN	NaN	NaN	592610000	360660000	231950000	375410000	223730000	151680000	12769000	9418400	3350900	0	0	0	195520000	123300000	72219000	0	0	0	8913500	4217200	4696400	0	0	0	0	0	0
MSB2	1	1	1	1	0	0	0	0	1	1	0	0	133.11	1306	NaN	NaN	NaN	NaN	NaN	NaN	NaN	NaN	0	0	0	0	0	0	0	0	0	0	0	0	0	0	0	0	0	0	0	0	0	0	0	0	0	0	0
NUD1	1	4	4	4	0	0	0	1	1	1	1	1	94.103	851	NaN	NaN	NaN	NaN	NaN	NaN	NaN	NaN	125050000	103640000	21417000	0	0	0	0	0	0	0	0	0	41243000	28236000	13007000	35926000	34936000	990750	35604000	32874000	2729600	6402400	4362100	2040400	5877700	3229100	2648700
PSE1	1	6	6	6	5	4	3	3	0	1	2	2	121.03	1089	0.98232	0.92878	1.0437	1.1202	NaN	NaN	0.79096	0.9269	3394100000	1658100000	1735900000	1403000000	550780000	852220000	949400000	520960000	428440000	742670000	425410000	317250000	259020000	131020000	128000000	0	0	0	1199700	811590	388120	16188000	12466000	3722600	22596000	16681000	5914700
RME1	1	4	4	4	1	0	0	0	1	2	0	1	33.904	300	NaN	NaN	NaN	NaN	NaN	0.86253	NaN	NaN	99378000	58089000	41290000	60939000	34794000	26145000	0	0	0	0	0	0	0	0	0	3130400	2213500	916910	13548000	7982300	5565800	0	0	0	21761000	13099000	8662200
SRP21	1	2	2	2	1	0	0	0	1	1	2	1	18.425	167	NaN	NaN	NaN	NaN	NaN	0.8041	0.99483	1.0832	293870000	183580000	110290000	11982000	6068200	5913600	0	0	0	0	0	0	0	0	0	54053000	34007000	20046000	3550100	2255500	1294600	66924000	56227000	10697000	157360000	85021000	72343000
RPC82	1	8	8	8	4	2	0	3	0	1	0	1	74.016	654	0.98931	0.8432	NaN	0.47707	NaN	NaN	NaN	NaN	3152400000	1671600000	1480800000	2924200000	1536700000	1387400000	144190000	80361000	63830000	0	0	0	46140000	27422000	18717000	0	0	0	24148000	13796000	10352000	0	0	0	13705000	13235000	469910
IMP2	1	1	1	1	1	0	0	0	1	0	1	1	39.07	346	NaN	NaN	NaN	NaN	NaN	NaN	NaN	NaN	161770000	105090000	56674000	109190000	70847000	38346000	0	0	0	0	0	0	0	0	0	5519800	4079600	1440200	0	0	0	26562000	18269000	8292700	20493000	11897000	8595900
ERG2	1	2	2	2	1	1	1	1	1	1	2	2	24.895	222	NaN	NaN	NaN	NaN	NaN	NaN	1.0468	1.0052	2776300000	1540300000	1236000000	205010000	110350000	94660000	451960000	251830000	200130000	447270000	238010000	209260000	482930000	237630000	245300000	212980000	138720000	74267000	156090000	96197000	59896000	429940000	251320000	178620000	390130000	216290000	173850000
NTH1	2	7	7	7	4	4	3	4	0	1	0	0	85.878	751	1.3159	2.2528	1.1854	1.1557	NaN	NaN	NaN	NaN	2163100000	1094600000	1068500000	398780000	196010000	202770000	592440000	330100000	262330000	194680000	101350000	93333000	972450000	465510000	506940000	0	0	0	4722700	1629100	3093600	0	0	0	0	0	0
TFC1	1	3	3	3	1	2	0	0	0	0	0	0	73.553	649	NaN	NaN	NaN	NaN	NaN	NaN	NaN	NaN	665530000	219630000	445900000	45348000	25743000	19605000	620180000	193890000	426290000	0	0	0	0	0	0	0	0	0	0	0	0	0	0	0	0	0	0
MVD1	1	11	11	11	8	8	5	4	1	2	4	4	44.115	396	0.92788	0.96484	1.0385	1.0218	NaN	0.41289	0.83188	0.70305	15879000000	9555800000	6323600000	10917000000	6759700000	4157600000	3268000000	1836300000	1431600000	620410000	340520000	279890000	691710000	360740000	330970000	39727000	30268000	9458800	89498000	72939000	16559000	148090000	85543000	62543000	104700000	69800000	34903000
COQ2	1	2	2	2	1	0	0	0	0	0	1	0	41.001	372	NaN	NaN	NaN	NaN	NaN	NaN	1.1723	NaN	131220000	71716000	59509000	69454000	39701000	29754000	0	0	0	0	0	0	0	0	0	0	0	0	0	0	0	61770000	32015000	29755000	0	0	0
PUP2	1	7	7	7	6	5	6	7	1	0	0	2	28.617	260	0.99812	0.99873	1.0666	1.1589	NaN	NaN	NaN	0.96789	12155000000	6474600000	5680000000	3590500000	1975900000	1614600000	1538800000	788810000	750020000	3220800000	1718500000	1502300000	3776500000	1977200000	1799400000	6125400	2625700	3499700	0	0	0	0	0	0	21905000	11643000	10262000
SPC110	1	15	15	15	7	2	3	2	0	7	1	2	111.78	944	0.83632	0.76385	0.82447	2.0021	NaN	1.3765	NaN	NaN	1233700000	545900000	687770000	450860000	170310000	280550000	170840000	98356000	72486000	141570000	78200000	63365000	266600000	89957000	176640000	0	0	0	163620000	88078000	75547000	21253000	14853000	6400400	18931000	6145600	12785000
MRP20	1	4	4	4	0	0	0	0	1	2	3	4	30.566	263	NaN	NaN	NaN	NaN	NaN	NaN	0.94584	0.87975	299630000	176450000	123170000	0	0	0	0	0	0	0	0	0	0	0	0	0	0	0	14187000	8196400	5990200	96676000	57707000	38969000	188760000	110550000	78212000
MRP49	1	6	6	6	1	0	0	0	2	5	5	4	16.021	137	NaN	NaN	NaN	NaN	NaN	1.091	0.87459	1.0269	1700800000	1004800000	695980000	0	0	0	0	0	0	0	0	0	0	0	0	51051000	34529000	16522000	260190000	160220000	99970000	771360000	439370000	331990000	618220000	370720000	247500000
MET4	1	2	2	2	1	0	1	1	0	0	0	0	74.372	672	NaN	NaN	NaN	NaN	NaN	NaN	NaN	NaN	215240000	123590000	91646000	31891000	22961000	8929800	0	0	0	93615000	49230000	44385000	89734000	51403000	38331000	0	0	0	0	0	0	0	0	0	0	0	0
SFP1	1	3	3	3	1	1	0	2	0	0	0	0	74.784	683	NaN	NaN	NaN	0.86134	NaN	NaN	NaN	NaN	182910000	105350000	77565000	79451000	50514000	28936000	38777000	18088000	20689000	0	0	0	64687000	36747000	27939000	0	0	0	0	0	0	0	0	0	0	0	0
ASF1	1	4	4	4	4	2	0	0	0	0	1	1	31.603	279	0.98254	1.008	NaN	NaN	NaN	NaN	NaN	NaN	788870000	417990000	370880000	657610000	343630000	313980000	126600000	71737000	54865000	0	0	0	0	0	0	0	0	0	0	0	0	2486300	1320600	1165700	2179200	1301900	877330
ARO4	1	8	8	8	7	6	6	6	0	1	4	3	39.749	370	1.018	0.92099	0.91326	0.86321	NaN	NaN	0.85515	1.0287	61724000000	35245000000	26479000000	24047000000	13757000000	10291000000	13533000000	7388100000	6144500000	13113000000	7489300000	5623400000	10621000000	6364600000	4256800000	0	0	0	9509500	6908500	2601000	207320000	128470000	78843000	192740000	110960000	81781000
BIO2	1	2	2	2	1	1	0	1	0	0	1	0	41.884	375	NaN	NaN	NaN	NaN	NaN	NaN	NaN	NaN	348140000	177090000	171050000	108400000	38962000	69434000	177520000	100640000	76887000	0	0	0	49241000	28190000	21051000	0	0	0	0	0	0	12976000	9300800	3675600	0	0	0
CDC11	1	7	7	7	4	3	2	1	0	0	3	3	47.648	415	0.97044	1.08	1.0008	NaN	NaN	NaN	1.1179	0.99847	8484100000	4552200000	3931900000	3489200000	1926300000	1562900000	2134700000	1103500000	1031200000	2052600000	1053200000	999420000	194270000	81519000	112750000	0	0	0	0	0	0	212950000	129900000	83052000	400380000	257810000	142570000
DPH2	1	3	3	3	2	1	1	1	0	0	0	0	59.775	534	0.58303	NaN	NaN	NaN	NaN	NaN	NaN	NaN	580730000	350160000	230570000	199890000	142170000	57724000	109610000	57114000	52494000	139900000	76680000	63217000	131330000	74195000	57134000	0	0	0	0	0	0	0	0	0	0	0	0
ACP1	1	3	3	3	3	3	3	3	1	2	2	2	13.943	125	1.0353	0.97834	1.054	1.0742	NaN	1.4361	NaN	NaN	30241000000	16171000000	14070000000	8854700000	4931400000	3923300000	7223000000	3736600000	3486400000	7117500000	3774300000	3343200000	6889200000	3639100000	3250000000	13846000	8175400	5671100	26187000	13555000	12632000	78089000	45077000	33012000	38128000	22659000	15469000
HYM1	1	2	2	2	0	0	0	0	0	1	1	2	45.853	399	NaN	NaN	NaN	NaN	NaN	NaN	NaN	0.65923	48658000	14997000	33661000	0	0	0	0	0	0	0	0	0	0	0	0	0	0	0	9302700	6163400	3139300	32001000	4445900	27555000	7354900	4387800	2967100
DPH5	1	3	3	3	3	3	2	2	0	0	0	0	33.847	300	0.98958	1.1777	1.0165	1.0767	NaN	NaN	NaN	NaN	5381900000	3182100000	2199900000	2679300000	1779600000	899700000	1093100000	587020000	506110000	725180000	402230000	322950000	884290000	413190000	471110000	0	0	0	0	0	0	0	0	0	0	0	0
EFB1	1	19	19	19	16	15	14	14	0	0	5	5	22.627	206	0.97818	0.97856	0.98043	0.96958	NaN	NaN	1.0237	1.0657	315270000000	176880000000	138390000000	98756000000	55670000000	43086000000	63561000000	34898000000	28663000000	101190000000	57153000000	44039000000	51329000000	28893000000	22437000000	0	0	0	0	0	0	229180000	140400000	88780000	206600000	129810000	76796000
GSH1	1	2	2	2	2	1	1	1	0	0	0	0	78.253	678	0.79222	1.1365	NaN	NaN	NaN	NaN	NaN	NaN	613970000	328430000	285540000	164740000	88540000	76202000	177830000	95683000	82144000	146780000	74902000	71879000	124620000	69307000	55311000	0	0	0	0	0	0	0	0	0	0	0	0
HSP150	1	9	9	7	5	4	4	6	1	0	0	0	41.059	413	0.54613	0.88969	0.83869	0.851	NaN	NaN	NaN	NaN	1441300000	870960000	570350000	362430000	249150000	113280000	450950000	256780000	194180000	305040000	177870000	127170000	322890000	187170000	135720000	0	0	0	0	0	0	0	0	0	0	0	0
HIR2	1	2	2	2	2	1	1	1	0	0	0	0	98.444	875	1.1221	NaN	NaN	NaN	NaN	NaN	NaN	NaN	703090000	356500000	346590000	213670000	105850000	107830000	152100000	73610000	78487000	250240000	133830000	116410000	87080000	43207000	43873000	0	0	0	0	0	0	0	0	0	0	0	0
HOG1	1	4	4	4	4	3	4	2	0	0	0	0	48.858	435	NaN	1.8464	NaN	NaN	NaN	NaN	NaN	NaN	3704600000	1442500000	2262100000	1420500000	647460000	773020000	1909600000	665370000	1244300000	374520000	129690000	244830000	0	0	0	0	0	0	0	0	0	0	0	0	0	0	0
MKK2	1	1	1	1	0	0	1	0	0	0	0	0	56.757	506	NaN	NaN	NaN	NaN	NaN	NaN	NaN	NaN	82847000	52738000	30109000	0	0	0	0	0	0	82847000	52738000	30109000	0	0	0	0	0	0	0	0	0	0	0	0	0	0	0
AEP1	1	2	2	2	0	0	0	0	0	1	2	1	59.747	518	NaN	NaN	NaN	NaN	NaN	NaN	2.1189	NaN	45208000	19158000	26051000	0	0	0	0	0	0	0	0	0	0	0	0	0	0	0	3147400	1726300	1421100	37596000	14389000	23207000	4464700	3042000	1422800
NGG1	1	3	3	3	1	2	2	1	0	0	0	0	79.281	702	NaN	1.6718	0.72365	NaN	NaN	NaN	NaN	NaN	511080000	254030000	257050000	96132000	34579000	61554000	164120000	70830000	93290000	159930000	96793000	63139000	90894000	51829000	39065000	0	0	0	0	0	0	0	0	0	0	0	0
RPN12	1	11	11	11	8	7	8	5	0	1	1	1	31.919	274	1.0517	1.1271	1.0716	1.1826	NaN	NaN	NaN	NaN	10242000000	5345200000	4896500000	3465400000	1861900000	1603500000	2866100000	1455500000	1410500000	2208500000	1139800000	1068700000	1691500000	882690000	808790000	0	0	0	0	0	0	1418400	896360	522050	8888100	4428700	4459400
NUP2	1	19	19	19	11	11	10	11	1	0	3	1	77.88	720	0.97727	0.9251	0.96235	1.0194	NaN	NaN	1.2949	NaN	13786000000	7807500000	5978300000	4110000000	2380600000	1729400000	3461700000	1977300000	1484400000	3010300000	1735200000	1275000000	3082100000	1649400000	1432700000	10417000	6361900	4055500	0	0	0	88500000	45299000	43200000	22700000	13268000	9431600
GCD6	1	6	6	6	5	4	3	3	0	0	0	0	81.16	712	1.086	1.0637	0.95135	0.93486	NaN	NaN	NaN	NaN	5165800000	2852000000	2313800000	2027600000	1125500000	902120000	1535900000	811510000	724380000	873120000	502700000	370420000	729210000	412300000	316910000	0	0	0	0	0	0	0	0	0	0	0	0
NAB2	1	7	7	7	4	4	4	4	1	1	2	0	58.32	525	1.0174	1.0406	1.0089	1.0137	NaN	NaN	1.4769	NaN	6355300000	3499500000	2855800000	1362100000	762920000	599220000	1817900000	982270000	835670000	1495600000	823530000	672070000	1612800000	894180000	718590000	14772000	8230400	6541700	8598100	5089800	3508300	43481000	23318000	20162000	0	0	0
PRP19	1	6	6	6	5	5	4	4	0	0	0	0	56.569	503	1.3639	0.88717	0.87401	1.2288	NaN	NaN	NaN	NaN	1971300000	1055500000	915840000	673470000	336300000	337170000	437720000	249810000	187910000	512600000	305660000	206940000	347540000	163720000	183820000	0	0	0	0	0	0	0	0	0	0	0	0
PRP21	1	1	1	1	0	1	1	0	0	0	0	0	33.052	280	NaN	0.97346	NaN	NaN	NaN	NaN	NaN	NaN	149210000	82166000	67045000	0	0	0	87741000	52892000	34849000	61469000	29274000	32195000	0	0	0	0	0	0	0	0	0	0	0	0	0	0	0
ECM25	1	2	2	2	0	0	0	1	1	1	1	1	68.463	599	NaN	NaN	NaN	NaN	NaN	NaN	NaN	NaN	107740000	65360000	42385000	0	0	0	0	0	0	0	0	0	58870000	33289000	25581000	4113900	2643600	1470300	2075300	1394900	680380	24927000	17070000	7857000	17758000	10963000	6795900
DUR1,2	1	2	2	2	1	1	0	0	0	0	0	0	201.83	1835	NaN	NaN	NaN	NaN	NaN	NaN	NaN	NaN	231140000	124820000	106310000	99345000	60111000	39234000	131790000	64713000	67081000	0	0	0	0	0	0	0	0	0	0	0	0	0	0	0	0	0	0
RPA12	1	3	3	3	3	3	3	3	0	0	1	1	13.66	125	0.96694	0.96993	1.0805	0.94806	NaN	NaN	NaN	NaN	6880700000	3884400000	2996300000	1946300000	1058900000	887340000	1824300000	1028200000	796060000	1924900000	1126500000	798390000	1184100000	669840000	514290000	0	0	0	0	0	0	810240	604580	205660	328790	328790	0
SPT16	1	17	17	17	6	5	4	6	1	5	7	5	118.63	1035	1.1665	1.0279	1.1537	1.0041	NaN	1.5256	1.2158	0.99052	7213400000	4157800000	3055600000	1892600000	1156400000	736130000	1703000000	994040000	708910000	1721200000	975120000	746090000	1140600000	624420000	516220000	2645000	1703400	941610	73888000	35992000	37896000	357650000	186860000	170790000	321900000	183250000	138650000
MSS1	1	4	4	4	0	0	0	0	1	1	3	2	58.351	526	NaN	NaN	NaN	NaN	NaN	NaN	1.1767	0.90362	26361000	16332000	10029000	0	0	0	0	0	0	0	0	0	0	0	0	0	0	0	7305800	5719800	1586000	9696200	5562500	4133700	9358800	5049900	4308900
RPD3	1	6	6	6	2	2	1	0	1	3	4	3	48.904	433	1.025	1.2372	NaN	NaN	NaN	1.634	0.97344	0.80878	2047700000	915860000	1131800000	826000000	427530000	398470000	441490000	177470000	264020000	247800000	130170000	117630000	0	0	0	11863000	6614100	5249200	187470000	47838000	139630000	231920000	56962000	174960000	101130000	69273000	31854000
SMI1	1	11	11	11	8	8	7	8	0	0	0	0	57.079	505	0.86657	1.0062	1.0339	1.0737	NaN	NaN	NaN	NaN	10452000000	5917000000	4534600000	3810900000	2214600000	1596200000	2307200000	1273300000	1034000000	2059000000	1125800000	933150000	2274600000	1303300000	971290000	0	0	0	0	0	0	0	0	0	0	0	0
PAH1	1	3	3	3	2	1	2	3	0	0	0	0	95.03	862	0.9207	NaN	NaN	1.0519	NaN	NaN	NaN	NaN	496850000	286710000	210140000	145540000	79888000	65653000	81476000	51276000	30200000	75155000	44679000	30476000	194680000	110870000	83811000	0	0	0	0	0	0	0	0	0	0	0	0
SRB4	1	4	4	4	4	3	3	4	0	0	0	0	78.475	687	0.99879	1.1273	0.96327	0.75137	NaN	NaN	NaN	NaN	1362600000	757080000	605520000	375430000	209680000	165750000	258320000	152620000	105700000	313730000	169790000	143940000	415120000	224990000	190130000	0	0	0	0	0	0	0	0	0	0	0	0
DOA4	1	3	3	3	1	1	0	0	0	1	0	0	105.19	926	NaN	0.66189	NaN	NaN	NaN	NaN	NaN	NaN	119070000	64855000	54214000	84998000	46583000	38415000	22989000	12033000	10956000	0	0	0	0	0	0	0	0	0	11082000	6238900	4842700	0	0	0	0	0	0
SIP1	1	5	5	5	0	2	0	1	2	0	2	2	91.07	815	NaN	NaN	NaN	NaN	NaN	NaN	0.85062	NaN	198580000	120300000	78279000	0	0	0	71320000	40072000	31249000	0	0	0	60233000	39696000	20537000	16847000	10301000	6546600	0	0	0	40834000	23780000	17054000	9341600	6448700	2892900
SUA5	1	6	6	6	2	1	2	2	0	1	3	3	46.538	426	1.8793	NaN	0.98395	1.0964	NaN	NaN	0.79494	0.97783	1063400000	470760000	592610000	592790000	205150000	387640000	16592000	9884600	6707100	91877000	44675000	47202000	88885000	39123000	49762000	0	0	0	10336000	6279000	4057000	159970000	103480000	56487000	102920000	62170000	40755000
SUV3	1	4	4	4	0	0	0	0	1	2	3	0	84.323	737	NaN	NaN	NaN	NaN	NaN	1.0079	0.94087	NaN	43743000	27835000	15908000	0	0	0	0	0	0	0	0	0	0	0	0	926120	573830	352290	4837500	2840100	1997400	37979000	24421000	13558000	0	0	0
STE14	1	1	1	1	1	1	1	0	0	0	0	0	27.887	239	NaN	NaN	NaN	NaN	NaN	NaN	NaN	NaN	137260000	77101000	60160000	82850000	48104000	34746000	54410000	28996000	25414000	0	0	0	0	0	0	0	0	0	0	0	0	0	0	0	0	0	0
SSE2	1	10	8	8	6	5	5	4	2	1	3	4	77.62	693	0.99495	1.4889	1.6056	1.5484	NaN	NaN	NaN	0.98878	3306800000	1596000000	1710800000	985690000	535070000	450630000	739880000	327870000	412010000	635480000	282480000	353000000	866570000	409560000	457010000	20847000	8612100	12235000	0	0	0	27387000	14687000	12700000	30916000	17699000	13217000
SWI3	1	8	8	8	2	6	5	5	1	0	0	0	92.925	825	0.74223	0.98943	0.80999	0.69064	NaN	NaN	NaN	NaN	2343300000	1304400000	1038900000	310630000	166310000	144320000	680430000	359240000	321190000	776160000	428380000	347780000	545200000	332290000	212910000	30861000	18195000	12666000	0	0	0	0	0	0	0	0	0
STH1	1	13	13	13	6	5	3	4	0	6	1	1	156.74	1359	0.85606	0.89039	0.67065	1.0658	NaN	2.3928	NaN	NaN	2564500000	1045300000	1519200000	1374000000	403710000	970280000	359900000	211280000	148610000	221360000	139970000	81391000	237720000	128770000	108940000	0	0	0	277010000	111100000	165910000	41356000	23926000	17431000	53139000	26552000	26587000
FBP26	1	2	2	2	2	1	1	1	0	0	0	0	52.594	452	NaN	NaN	NaN	NaN	NaN	NaN	NaN	NaN	350520000	198280000	152250000	67467000	42330000	25136000	85128000	46864000	38264000	96390000	56576000	39815000	101540000	52507000	49031000	0	0	0	0	0	0	0	0	0	0	0	0
PET127	1	5	5	5	0	0	0	0	1	2	3	2	93.406	800	NaN	NaN	NaN	NaN	NaN	1.0395	0.74629	1.1116	133140000	89927000	43214000	0	0	0	0	0	0	0	0	0	0	0	0	2877600	2218700	658930	26186000	14360000	11826000	54065000	38125000	15940000	50012000	35223000	14789000
RML2	1	3	3	3	2	2	1	0	1	2	0	2	43.785	393	0.95723	1.0218	NaN	NaN	NaN	0.90258	NaN	0.97861	551300000	314730000	236570000	138730000	92817000	45913000	195020000	99043000	95974000	113470000	56376000	57098000	0	0	0	15024000	10330000	4694000	37502000	25682000	11820000	0	0	0	51557000	30485000	21072000
FRD1	1	11	11	11	6	6	6	3	0	2	2	4	50.843	470	0.99079	0.9339	0.98288	1.0639	NaN	0.41862	0.80332	1.008	18196000000	10343000000	7852300000	5213600000	3129800000	2083800000	2855200000	1707900000	1147300000	6176100000	3405700000	2770400000	3838900000	2033000000	1805800000	0	0	0	11777000	9330100	2446500	16087000	10392000	5695100	84091000	47343000	36748000
UTR4	1	3	3	3	2	0	0	0	0	0	0	1	25.187	227	1.2764	NaN	NaN	NaN	NaN	NaN	NaN	NaN	180190000	88555000	91636000	164040000	80229000	83813000	0	0	0	0	0	0	0	0	0	0	0	0	0	0	0	0	0	0	16148000	8326100	7822400
RAD23	1	7	7	6	6	5	4	4	0	0	0	0	42.366	398	1.0781	1.0422	1.0962	1.1126	NaN	NaN	NaN	NaN	30380000000	17012000000	13367000000	10398000000	5885000000	4513100000	10108000000	5607500000	4500600000	4756600000	2526200000	2230400000	5116800000	2993600000	2123200000	0	0	0	0	0	0	0	0	0	0	0	0
BRR2	1	6	6	6	2	2	2	3	1	0	0	0	246.18	2163	0.93594	NaN	0.92759	0.98004	NaN	NaN	NaN	NaN	1124600000	646410000	478210000	629290000	406180000	223110000	66808000	20811000	45997000	163170000	89180000	73992000	251950000	118860000	133090000	13415000	11385000	2030400	0	0	0	0	0	0	0	0	0
TMT1	1	2	2	2	1	1	1	1	0	0	0	0	34.768	299	NaN	1.0017	NaN	NaN	NaN	NaN	NaN	NaN	454330000	214730000	239600000	95082000	38901000	56181000	61755000	32415000	29340000	152420000	82140000	70276000	145070000	61273000	83802000	0	0	0	0	0	0	0	0	0	0	0	0
CHD1	1	11	11	11	3	2	2	3	0	5	3	2	168.24	1468	1.0744	0.95905	0.81679	0.83729	NaN	2.4298	1.2562	1.5602	843460000	474310000	369150000	334940000	184790000	150160000	131710000	73212000	58497000	123370000	73077000	50296000	177920000	102610000	75305000	0	0	0	39303000	17867000	21436000	18446000	13609000	4836800	17766000	9142700	8623600
KAP122	1	3	3	3	2	2	1	0	0	0	1	0	123.53	1081	0.93074	NaN	0.71613	NaN	NaN	NaN	NaN	NaN	700820000	364960000	335860000	461280000	228950000	232330000	96244000	46447000	49797000	140080000	87587000	52490000	0	0	0	0	0	0	0	0	0	3225300	1974500	1250800	0	0	0
HBS1	1	7	7	7	7	3	3	3	0	0	0	0	68.729	611	1.0593	1.0219	1.3404	1.1493	NaN	NaN	NaN	NaN	3097500000	1668500000	1429000000	1078300000	591700000	486640000	739560000	402020000	337540000	640910000	334170000	306740000	638690000	340650000	298040000	0	0	0	0	0	0	0	0	0	0	0	0
NRP1	1	3	3	3	2	2	2	1	0	0	0	0	79.298	719	1.0408	NaN	1.1584	NaN	NaN	NaN	NaN	NaN	837350000	446270000	391080000	384920000	211780000	173150000	174040000	88214000	85823000	158150000	84173000	73976000	120240000	62101000	58138000	0	0	0	0	0	0	0	0	0	0	0	0
SFA1	1	10	10	10	9	7	7	7	0	0	0	0	41.042	386	1.0015	1.0014	0.99351	1.036	NaN	NaN	NaN	NaN	15086000000	8392500000	6693700000	4667100000	2549400000	2117600000	3626500000	2024800000	1601800000	3740100000	2151500000	1588700000	3052400000	1666800000	1385600000	0	0	0	0	0	0	0	0	0	0	0	0
TOA1	1	2	2	2	0	0	1	0	0	1	0	0	32.201	286	NaN	NaN	NaN	NaN	NaN	NaN	NaN	NaN	72660000	50370000	22290000	0	0	0	0	0	0	60260000	39814000	20446000	0	0	0	0	0	0	12400000	10556000	1843800	0	0	0	0	0	0
TOA2	1	1	1	1	1	1	1	1	0	0	0	0	13.458	122	0.93177	0.97913	1.0392	NaN	NaN	NaN	NaN	NaN	1114500000	658510000	455950000	348350000	217330000	131010000	348170000	194010000	154160000	330080000	196830000	133250000	87856000	50328000	37528000	0	0	0	0	0	0	0	0	0	0	0	0
TFB1	1	2	2	2	1	1	1	0	0	0	0	0	72.894	642	NaN	NaN	NaN	NaN	NaN	NaN	NaN	NaN	509830000	175890000	333940000	210690000	98112000	112580000	122510000	35691000	86815000	176630000	42082000	134550000	0	0	0	0	0	0	0	0	0	0	0	0	0	0	0
ABD1	1	4	4	4	2	3	3	3	0	0	0	0	50.34	436	1.1247	1.2329	1.055	1.2498	NaN	NaN	NaN	NaN	5134500000	1222800000	3911700000	745370000	409550000	335810000	1461400000	303560000	1157900000	1384100000	240200000	1143900000	1543600000	269460000	1274100000	0	0	0	0	0	0	0	0	0	0	0	0
ALK2	1	2	2	2	1	0	1	0	0	0	0	0	76.372	676	NaN	NaN	NaN	NaN	NaN	NaN	NaN	NaN	222740000	149800000	72944000	194780000	137970000	56806000	0	0	0	27959000	11821000	16138000	0	0	0	0	0	0	0	0	0	0	0	0	0	0	0
YSC83	1	3	3	3	0	0	0	0	0	1	3	1	44.235	385	NaN	NaN	NaN	NaN	NaN	1.0943	1.1731	1.1035	43973000	24915000	19059000	0	0	0	0	0	0	0	0	0	0	0	0	0	0	0	6633300	4048600	2584600	24728000	13699000	11029000	12612000	7166900	5445200
AFG2	1	3	3	3	2	2	0	0	0	0	0	1	84.747	780	0.91547	0.95205	NaN	NaN	NaN	NaN	NaN	NaN	1056800000	621830000	434920000	630730000	370210000	260530000	426020000	251620000	174390000	0	0	0	0	0	0	0	0	0	0	0	0	0	0	0	0	0	0
CAT2	1	1	1	1	1	0	1	0	0	0	0	0	77.241	670	NaN	NaN	NaN	NaN	NaN	NaN	NaN	NaN	822940000	236340000	586600000	225120000	143690000	81423000	0	0	0	597820000	92644000	505180000	0	0	0	0	0	0	0	0	0	0	0	0	0	0	0
PEX2	1	1	1	1	0	0	0	0	0	0	1	0	30.751	271	NaN	NaN	NaN	NaN	NaN	NaN	NaN	NaN	91299000	43037000	48262000	0	0	0	0	0	0	0	0	0	0	0	0	0	0	0	0	0	0	91299000	43037000	48262000	0	0	0
ELM1	1	3	3	3	0	0	0	1	0	0	1	2	72.149	640	NaN	NaN	NaN	NaN	NaN	NaN	NaN	1.0908	485970000	401300000	84675000	0	0	0	0	0	0	0	0	0	375330000	331380000	43959000	0	0	0	0	0	0	27528000	17320000	10208000	83111000	52603000	30508000
EMP70	1	4	4	4	0	0	0	1	1	0	2	1	75.962	667	NaN	NaN	NaN	NaN	NaN	NaN	1.3428	NaN	123370000	83800000	39574000	0	0	0	0	0	0	0	0	0	49726000	35194000	14533000	7071700	4292500	2779200	0	0	0	37922000	24238000	13684000	28655000	20076000	8579000
GYP6	1	3	3	3	2	1	2	0	0	0	0	0	53.814	458	0.76032	0.69945	0.6876	NaN	NaN	NaN	NaN	NaN	603040000	361470000	241570000	119840000	71670000	48166000	15513000	10795000	4718600	467690000	279010000	188680000	0	0	0	0	0	0	0	0	0	0	0	0	0	0	0
TIM12	1	1	1	1	1	1	1	0	0	0	0	0	12.284	109	NaN	NaN	NaN	NaN	NaN	NaN	NaN	NaN	845980000	447090000	398900000	201170000	107810000	93364000	322970000	166570000	156400000	321840000	172710000	149130000	0	0	0	0	0	0	0	0	0	0	0	0	0	0	0
NGR1	1	1	1	1	1	1	1	0	0	0	0	0	75.023	672	NaN	NaN	NaN	NaN	NaN	NaN	NaN	NaN	83680000	46288000	37392000	37823000	18650000	19173000	21587000	12290000	9297700	24270000	15349000	8921000	0	0	0	0	0	0	0	0	0	0	0	0	0	0	0
NPL6	1	7	7	7	3	3	1	3	0	1	0	4	49.65	435	0.86118	1.1487	1.1057	1.1485	NaN	NaN	NaN	0.93957	1647800000	834790000	813010000	368780000	172840000	195940000	331470000	154480000	176990000	385930000	204280000	181650000	501470000	270590000	230880000	0	0	0	6472900	1763100	4709800	0	0	0	53677000	30828000	22848000
GSP2	1	10	1	1	7	7	6	8	3	3	4	3	24.99	220	NaN	NaN	NaN	NaN	NaN	NaN	NaN	NaN	771450000	389970000	381490000	0	0	0	240620000	126090000	114530000	331250000	182240000	149010000	199590000	81632000	117950000	0	0	0	0	0	0	0	0	0	0	0	0
PPG1	1	3	3	3	0	0	1	0	1	2	0	0	42.432	368	NaN	NaN	NaN	NaN	NaN	1.0066	NaN	NaN	95723000	52148000	43575000	0	0	0	0	0	0	88180000	47900000	40280000	0	0	0	1453500	988310	465230	6089600	3260000	2829600	0	0	0	0	0	0
BCS1	1	2	2	2	0	0	1	0	0	0	1	0	51.107	456	NaN	NaN	NaN	NaN	NaN	NaN	NaN	NaN	83362000	53686000	29676000	0	0	0	0	0	0	74088000	47201000	26887000	0	0	0	0	0	0	0	0	0	9274500	6485300	2789200	0	0	0
SEC8	1	5	5	5	3	2	1	1	0	0	0	1	122.22	1065	0.98504	NaN	1.6862	NaN	NaN	NaN	NaN	NaN	1635900000	1280700000	355190000	326570000	202790000	123780000	560030000	505410000	54621000	218840000	89852000	128980000	514620000	474700000	39925000	0	0	0	0	0	0	0	0	0	15882000	7998400	7883300
NFU1	1	10	10	10	7	6	7	7	1	2	5	5	29.174	256	0.93383	1.0276	1.0043	1.0568	NaN	0.96969	1.0455	1.0174	10057000000	5615800000	4441400000	3063200000	1700500000	1362700000	2231500000	1268500000	963000000	2537000000	1404700000	1132300000	1828900000	986600000	842340000	6537100	4537700	1999400	13480000	8036700	5443400	105590000	60713000	44876000	270960000	182250000	88705000
MRS6	1	5	5	5	2	4	3	1	0	0	1	0	67.373	603	2.4603	1.0296	0.92392	NaN	NaN	NaN	NaN	NaN	8030500000	1104900000	6925600000	2834000000	232630000	2601400000	2440000000	375060000	2064900000	2574000000	365570000	2208500000	174460000	128880000	45576000	0	0	0	0	0	0	8015800	2750600	5265200	0	0	0
BEM3	1	9	9	9	5	3	3	2	0	0	2	3	124.91	1128	0.99131	NaN	NaN	NaN	NaN	NaN	0.9197	1.0725	491200000	294770000	196440000	157350000	86798000	70553000	98225000	61621000	36604000	97617000	57805000	39811000	89424000	59624000	29800000	0	0	0	0	0	0	19643000	12651000	6992100	28944000	16268000	12676000
DRS1	1	8	8	8	7	5	3	3	0	0	0	1	84.842	752	0.81565	0.91119	0.86975	0.97105	NaN	NaN	NaN	NaN	5751600000	3319400000	2432200000	1880000000	1108900000	771100000	1515400000	837140000	678210000	1040600000	608130000	432440000	1259900000	733560000	526370000	0	0	0	0	0	0	0	0	0	55738000	31688000	24050000
TRS65	1	1	1	1	0	0	0	1	0	0	0	0	63.367	560	NaN	NaN	NaN	NaN	NaN	NaN	NaN	NaN	37222000	37222000	0	0	0	0	0	0	0	0	0	0	37222000	37222000	0	0	0	0	0	0	0	0	0	0	0	0	0
PRS1	1	7	7	7	6	3	3	2	0	0	2	3	47.047	427	1.0542	0.91405	0.88139	0.86615	NaN	NaN	1.2704	0.84142	10341000000	6058200000	4283000000	4787600000	2709300000	2078200000	3666300000	2216000000	1450300000	1489900000	930640000	559300000	203520000	90744000	112770000	0	0	0	0	0	0	95016000	48192000	46824000	98842000	63268000	35574000
PDC2	1	3	3	3	2	2	1	2	0	0	0	0	103.94	925	0.82902	0.70947	NaN	0.70095	NaN	NaN	NaN	NaN	691560000	413240000	278320000	179630000	121630000	57994000	196240000	138020000	58221000	184170000	78442000	105730000	131530000	75148000	56377000	0	0	0	0	0	0	0	0	0	0	0	0
MRPL6	1	7	7	7	2	2	1	1	1	3	0	3	23.889	214	0.90873	1.0173	NaN	NaN	NaN	0.94888	NaN	0.87961	803100000	465780000	337330000	233990000	136610000	97387000	178280000	90341000	87941000	111220000	69318000	41901000	212780000	125880000	86903000	12333000	8488100	3845200	29861000	19403000	10458000	0	0	0	24639000	15746000	8892900
SMC1	1	8	8	8	3	2	3	1	0	1	0	1	141.28	1225	1.4349	NaN	NaN	NaN	NaN	NaN	NaN	NaN	1359800000	710060000	649750000	661060000	335730000	325330000	80529000	42291000	38239000	437810000	192200000	245620000	0	0	0	0	0	0	17989000	8438900	9550300	0	0	0	162410000	131400000	31012000
SMY2	1	11	11	11	7	5	5	7	0	0	0	2	81.396	740	0.88352	0.8286	0.81809	0.83708	NaN	NaN	NaN	1.5443	3342100000	1984300000	1357900000	684890000	393370000	291530000	866710000	516440000	350270000	785160000	466590000	318570000	982990000	595540000	387450000	0	0	0	0	0	0	0	0	0	22355000	12321000	10034000
RPC34	1	4	4	4	2	1	2	2	1	0	1	1	36.135	317	1.7826	NaN	NaN	1.592	NaN	NaN	NaN	NaN	1339600000	450970000	888620000	370890000	142140000	228750000	233650000	76183000	157470000	338810000	73809000	265000000	377830000	146830000	231000000	1691000	1691000	0	0	0	0	9382600	5964000	3418600	7338500	4357000	2981500
SUI1	1	4	4	4	1	2	2	2	0	1	1	2	12.312	108	NaN	0.49077	0.60962	0.93006	NaN	NaN	NaN	0.35597	1760900000	1225800000	535030000	501650000	371760000	129890000	620400000	460580000	159820000	307630000	200050000	107580000	208920000	120820000	88106000	0	0	0	8412600	6639800	1772800	60729000	35522000	25206000	53124000	30469000	22655000
STE5	1	1	1	1	1	0	0	0	0	0	0	0	102.73	917	NaN	NaN	NaN	NaN	NaN	NaN	NaN	NaN	74405000	39869000	34536000	74405000	39869000	34536000	0	0	0	0	0	0	0	0	0	0	0	0	0	0	0	0	0	0	0	0	0
UFD4	1	4	4	4	2	3	1	2	0	0	0	0	167.84	1483	0.99904	1.0019	0.77572	NaN	NaN	NaN	NaN	NaN	661490000	348920000	312570000	191480000	102930000	88554000	299160000	167270000	131890000	112100000	47329000	64772000	58748000	31394000	27354000	0	0	0	0	0	0	0	0	0	0	0	0
PRP40	1	2	2	2	1	1	0	0	0	0	0	0	69.064	583	0.76879	NaN	NaN	NaN	NaN	NaN	NaN	NaN	179980000	99084000	80895000	121940000	65312000	56628000	58038000	33771000	24267000	0	0	0	0	0	0	0	0	0	0	0	0	0	0	0	0	0	0
RPT5	1	9	9	9	9	6	7	5	1	1	1	3	48.255	434	1.0212	1.0381	0.99537	1.0649	NaN	NaN	NaN	1.2653	17837000000	9545900000	8290800000	6725800000	3663300000	3062400000	4381600000	2365500000	2016100000	3759200000	2006300000	1752900000	2842600000	1444300000	1398300000	3459500	2150200	1309400	1741900	1093800	648120	16332000	9172200	7160100	106070000	54126000	51947000
RPT3	1	3	3	3	3	2	2	2	0	0	0	0	47.893	428	0.98455	1.0233	1.0376	1.0222	NaN	NaN	NaN	NaN	3446400000	1919200000	1527200000	1162400000	674580000	487870000	679700000	359940000	319760000	836960000	463040000	373920000	767320000	421650000	345680000	0	0	0	0	0	0	0	0	0	0	0	0
RPT1	1	7	7	7	6	6	6	6	0	0	0	1	51.982	467	1.0631	1.0531	1.0952	1.0889	NaN	NaN	NaN	NaN	23817000000	12805000000	11012000000	4144400000	2388400000	1756000000	6039600000	3248900000	2790700000	6572600000	3346500000	3226100000	7050600000	3814900000	3235700000	0	0	0	0	0	0	0	0	0	9919800	6157700	3762100
CSE1	1	4	4	4	3	3	3	1	0	0	1	1	109.35	960	1.4149	1.0192	1.0817	NaN	NaN	NaN	NaN	NaN	2709600000	1203600000	1505900000	904270000	403660000	500600000	649760000	242290000	407470000	675890000	288600000	387290000	85055000	43915000	41140000	0	0	0	0	0	0	128450000	76862000	51592000	266130000	148280000	117850000
CSE2	1	1	1	1	1	0	0	1	0	0	0	0	17.376	149	NaN	NaN	NaN	NaN	NaN	NaN	NaN	NaN	146680000	79965000	66713000	70539000	41660000	28879000	0	0	0	0	0	0	76139000	38306000	37834000	0	0	0	0	0	0	0	0	0	0	0	0
DOM34	1	6	6	6	5	4	4	4	0	0	0	0	44.057	386	0.97937	0.98796	1.0045	0.99821	NaN	NaN	NaN	NaN	3765800000	2127700000	1638100000	1286800000	727280000	559530000	864440000	471850000	392590000	813430000	473860000	339570000	801140000	454740000	346400000	0	0	0	0	0	0	0	0	0	0	0	0
MDL1	1	3	3	3	1	1	1	2	0	0	1	0	75.949	695	NaN	NaN	NaN	NaN	NaN	NaN	NaN	NaN	287200000	193770000	93427000	63209000	36758000	26451000	47777000	35959000	11818000	58504000	36833000	21671000	72079000	54093000	17986000	0	0	0	0	0	0	45627000	30127000	15500000	0	0	0
CNS1	1	14	14	14	11	8	7	7	0	0	0	0	44.112	385	0.9363	0.94158	0.87385	0.88494	NaN	NaN	NaN	NaN	9635600000	5285800000	4349900000	4216500000	2305800000	1910600000	1995600000	1092500000	903130000	1934000000	1038200000	895800000	1489500000	849210000	640280000	0	0	0	0	0	0	0	0	0	0	0	0
BUD2	1	5	5	5	3	1	3	1	0	0	0	0	126.66	1104	0.87181	NaN	NaN	NaN	NaN	NaN	NaN	NaN	217320000	131380000	85938000	162180000	101920000	60258000	28705000	13502000	15203000	26432000	15955000	10477000	0	0	0	0	0	0	0	0	0	0	0	0	0	0	0
DUT1	1	7	7	7	5	1	1	1	1	0	1	2	15.307	147	1.0103	1.1439	1.1601	1.1973	NaN	NaN	NaN	0.81685	12160000000	7029600000	5130200000	3750300000	2336800000	1413500000	2980800000	1605500000	1375200000	3044300000	1759200000	1285100000	2320500000	1287000000	1033400000	3904300	2405800	1498600	0	0	0	18936000	13214000	5722000	41109000	25337000	15773000
YKL091C	1	2	2	2	0	0	1	1	0	0	1	1	36.073	310	NaN	NaN	NaN	NaN	NaN	NaN	NaN	NaN	289520000	145880000	143640000	0	0	0	0	0	0	93826000	41297000	52529000	96898000	42490000	54408000	0	0	0	0	0	0	70260000	43794000	26465000	28535000	18297000	10238000
GDH2	1	3	3	3	3	1	2	1	0	0	0	0	124.33	1092	1.0667	NaN	NaN	NaN	NaN	NaN	NaN	NaN	782850000	382340000	400520000	212290000	115620000	96671000	178020000	84938000	93077000	199560000	99135000	100430000	192980000	82638000	110340000	0	0	0	0	0	0	0	0	0	0	0	0
PPZ2	1	2	2	2	0	0	0	0	1	1	2	2	78.491	710	NaN	NaN	NaN	NaN	NaN	NaN	1.0454	0.7779	88871000	50095000	38776000	0	0	0	0	0	0	0	0	0	0	0	0	11628000	7075400	4552400	3304700	2294200	1010500	30544000	16620000	13924000	43395000	24105000	19289000
NTF2	1	1	1	1	1	1	1	1	0	0	0	0	14.453	125	NaN	NaN	NaN	NaN	NaN	NaN	NaN	NaN	406310000	247180000	159120000	111480000	73292000	38183000	108850000	68135000	40711000	91759000	54546000	37213000	94226000	51210000	43016000	0	0	0	0	0	0	0	0	0	0	0	0
SEC3	1	9	9	9	6	2	3	1	0	1	1	1	154.69	1336	0.89067	0.6876	0.88532	NaN	NaN	NaN	NaN	NaN	1117700000	653160000	464580000	604780000	352920000	251860000	206640000	124720000	81912000	182340000	105310000	77036000	97351000	54399000	42952000	0	0	0	4599700	2416500	2183200	10759000	6703000	4056400	11260000	6684600	4575800
SKN1	1	1	1	1	0	0	0	0	1	1	1	1	86.24	771	NaN	NaN	NaN	NaN	NaN	NaN	NaN	NaN	203120000	133730000	69390000	0	0	0	0	0	0	0	0	0	0	0	0	75414000	56884000	18530000	56000000	33368000	22632000	36575000	20241000	16334000	35132000	23238000	11894000
TFC4	1	1	1	1	1	0	0	0	0	0	0	0	120.23	1025	NaN	NaN	NaN	NaN	NaN	NaN	NaN	NaN	94767000	48264000	46502000	94767000	48264000	46502000	0	0	0	0	0	0	0	0	0	0	0	0	0	0	0	0	0	0	0	0	0
LHP1	1	8	8	8	6	6	8	8	1	0	0	0	32.104	275	0.93211	0.93066	0.91261	0.95674	NaN	NaN	NaN	NaN	15807000000	9021200000	6786300000	3570300000	2090300000	1480000000	3624500000	2044200000	1580300000	4639200000	2669600000	1969600000	3966900000	2212500000	1754400000	6679400	4675300	2004100	0	0	0	0	0	0	0	0	0
PRP18	1	1	1	1	1	1	0	1	0	0	0	0	28.377	251	NaN	NaN	NaN	NaN	NaN	NaN	NaN	NaN	55629000	28643000	26985000	41193000	19942000	21251000	14436000	8701500	5734200	0	0	0	0	0	0	0	0	0	0	0	0	0	0	0	0	0	0
ECT1	1	3	3	3	2	0	0	0	0	0	1	0	36.862	323	NaN	NaN	NaN	NaN	NaN	NaN	NaN	NaN	138310000	71518000	66787000	115160000	58038000	57126000	0	0	0	0	0	0	0	0	0	0	0	0	0	0	0	23142000	13481000	9661000	0	0	0
IXR1	1	4	4	4	1	1	1	1	0	3	1	1	67.855	597	1.0206	0.92857	0.8733	NaN	NaN	1.8865	NaN	NaN	1061800000	572520000	489250000	301740000	156140000	145600000	296290000	153670000	142610000	265450000	147320000	118130000	86406000	52441000	33964000	0	0	0	51934000	24668000	27265000	26774000	17386000	9387300	33180000	20890000	12290000
MFT1	1	1	1	1	0	0	1	0	0	0	0	0	44.996	392	NaN	NaN	NaN	NaN	NaN	NaN	NaN	NaN	72951000	38104000	34847000	0	0	0	0	0	0	72951000	38104000	34847000	0	0	0	0	0	0	0	0	0	0	0	0	0	0	0
TOM6	1	1	1	1	1	1	1	1	0	0	0	0	6.4074	61	1.1647	NaN	NaN	1.1996	NaN	NaN	NaN	NaN	355510000	182670000	172830000	93216000	52484000	40732000	15152000	6814800	8337400	22108000	11273000	10835000	225030000	112100000	112930000	0	0	0	0	0	0	0	0	0	0	0	0
HIS7	1	15	15	15	12	8	8	9	1	1	2	1	61.067	552	0.96107	0.96926	1.002	1.103	NaN	NaN	NaN	NaN	21759000000	11482000000	10277000000	8791600000	4643600000	4148100000	4262500000	2258100000	2004400000	4710000000	2521500000	2188600000	3958800000	2033100000	1925800000	18669000	14736000	3933300	0	0	0	7946200	5555400	2390800	9338300	5734000	3604300
MSN2	1	2	2	2	1	0	1	0	0	0	0	0	77.86	704	NaN	NaN	NaN	NaN	NaN	NaN	NaN	NaN	127170000	83430000	43736000	39510000	23503000	16007000	0	0	0	87656000	59927000	27729000	0	0	0	0	0	0	0	0	0	0	0	0	0	0	0
MSN4	1	3	3	3	2	2	1	1	0	0	0	1	69.722	630	1.1461	0.91646	NaN	NaN	NaN	NaN	NaN	NaN	1276600000	747490000	529160000	496970000	299760000	197210000	372330000	216270000	156060000	185510000	97267000	88240000	183630000	111640000	71985000	0	0	0	0	0	0	0	0	0	38212000	22550000	15662000
TRM2	1	2	2	2	1	0	1	2	0	0	0	0	72.851	639	1.1817	NaN	0.8308	0.79007	NaN	NaN	NaN	NaN	723400000	409710000	313690000	332700000	177840000	154860000	0	0	0	308740000	180480000	128270000	81963000	51393000	30570000	0	0	0	0	0	0	0	0	0	0	0	0
PEX6	1	3	3	3	1	1	0	0	0	0	1	1	115.57	1030	NaN	NaN	NaN	NaN	NaN	NaN	NaN	NaN	150930000	86399000	64532000	112730000	63655000	49078000	0	0	0	0	0	0	0	0	0	0	0	0	0	0	0	23737000	13984000	9753200	14462000	8761200	5700800
PET112	1	4	4	4	0	0	0	0	0	2	3	2	61.868	541	NaN	NaN	NaN	NaN	NaN	0.84179	0.73523	0.94463	60912000	38405000	22507000	0	0	0	0	0	0	0	0	0	0	0	0	0	0	0	5905500	3581100	2324400	29182000	20204000	8978100	25825000	14620000	11205000
NUF2	1	3	3	3	1	1	1	2	1	0	1	1	52.973	451	NaN	NaN	NaN	NaN	NaN	NaN	NaN	NaN	310270000	158060000	152210000	58697000	25060000	33637000	89852000	41476000	48376000	0	0	0	73187000	32755000	40432000	17582000	12252000	5330000	0	0	0	41613000	27899000	13715000	29340000	18618000	10722000
MKS1	1	2	2	2	2	0	0	1	1	0	0	0	65.642	584	0.78679	NaN	NaN	NaN	NaN	NaN	NaN	NaN	322400000	184440000	137960000	188150000	112270000	75879000	0	0	0	0	0	0	128800000	68453000	60352000	5446900	3722100	1724900	0	0	0	0	0	0	0	0	0
LTV1	1	5	5	5	4	2	2	2	1	0	0	0	53.39	463	0.97238	0.97931	0.84298	1.0088	NaN	NaN	NaN	NaN	4341000000	2662900000	1678000000	642030000	387940000	254100000	585010000	319360000	265650000	371370000	199270000	172100000	222790000	128880000	93913000	2519800000	1627500000	892280000	0	0	0	0	0	0	0	0	0
TFC3	1	2	2	2	0	0	1	1	0	0	0	0	132.11	1160	NaN	NaN	NaN	NaN	NaN	NaN	NaN	NaN	75977000	46690000	29287000	0	0	0	0	0	0	8254800	4102100	4152600	67722000	42587000	25135000	0	0	0	0	0	0	0	0	0	0	0	0
STO1	1	4	4	4	3	2	2	2	2	1	0	1	100.02	861	0.9702	1.0936	1.0013	0.97976	NaN	NaN	NaN	NaN	3901000000	1762500000	2138600000	1097400000	616920000	480510000	957960000	541340000	416610000	706890000	387920000	318970000	331640000	178040000	153590000	218320000	10363000	207950000	572840000	19179000	553660000	0	0	0	15946000	8686700	7259100
SRB2	1	2	2	2	2	1	0	0	0	0	0	0	22.894	210	NaN	NaN	NaN	NaN	NaN	NaN	NaN	NaN	340870000	214630000	126230000	340870000	214630000	126230000	0	0	0	0	0	0	0	0	0	0	0	0	0	0	0	0	0	0	0	0	0
TIF3	1	9	9	9	7	6	8	7	1	0	1	1	48.521	436	1.0047	0.91187	0.87366	0.88869	NaN	NaN	NaN	NaN	80626000000	46024000000	34602000000	21682000000	12136000000	9546000000	25652000000	14465000000	11187000000	26133000000	15260000000	10873000000	7076000000	4115000000	2961000000	36266000	24067000	12199000	0	0	0	19061000	10678000	8383100	28501000	13938000	14564000
PIN4	1	3	3	3	2	2	2	2	0	0	0	0	73.775	668	0.91548	0.92065	0.90456	1.0841	NaN	NaN	NaN	NaN	1338000000	775420000	562610000	394020000	221000000	173030000	291430000	159930000	131500000	450760000	278640000	172130000	201820000	115860000	85954000	0	0	0	0	0	0	0	0	0	0	0	0
TOD6	1	5	5	5	0	0	2	3	0	0	0	0	59.225	525	NaN	NaN	NaN	0.63421	NaN	NaN	NaN	NaN	194820000	122710000	72107000	0	0	0	0	0	0	51825000	34528000	17297000	142990000	88182000	54809000	0	0	0	0	0	0	0	0	0	0	0	0
	1	6	6	6	4	1	3	1	0	0	0	0	47.389	418	0.93947	NaN	NaN	NaN	NaN	NaN	NaN	NaN	720740000	390240000	330490000	555260000	295190000	260070000	66113000	38958000	27156000	63359000	30894000	32465000	36002000	25199000	10802000	0	0	0	0	0	0	0	0	0	0	0	0
PTC3	1	2	2	2	2	2	2	2	0	0	0	0	51.331	468	1.082	1.3487	1.0792	NaN	NaN	NaN	NaN	NaN	1828000000	950160000	877800000	532440000	296510000	235940000	694190000	352700000	341490000	505460000	249040000	256430000	95858000	51918000	43941000	0	0	0	0	0	0	0	0	0	0	0	0
SHP1	1	3	3	3	2	2	2	3	0	0	0	0	46.987	423	1.1328	1.1753	1.0937	1.1139	NaN	NaN	NaN	NaN	7890100000	4124300000	3765800000	1416600000	720540000	696080000	2016100000	1064400000	951720000	2484100000	1297600000	1186500000	1973200000	1041800000	931430000	0	0	0	0	0	0	0	0	0	0	0	0
	1	1	1	1	1	1	1	1	0	1	1	0	22.278	193	NaN	NaN	NaN	NaN	NaN	NaN	NaN	NaN	316600000	180270000	136340000	71558000	39871000	31687000	70342000	38179000	32163000	99107000	61452000	37654000	58075000	30692000	27383000	0	0	0	8027900	4888900	3139000	9494400	5184700	4309800	0	0	0
SKT5	1	11	11	11	1	1	0	0	3	5	4	5	77.066	696	NaN	NaN	NaN	NaN	NaN	0.95404	0.76041	0.7795	424820000	229040000	195780000	46809000	26913000	19896000	106020000	58913000	47106000	0	0	0	0	0	0	32685000	29382000	3303200	25333000	18306000	7026500	114940000	36084000	78860000	99030000	59439000	39591000
MTR2	1	1	1	1	0	1	0	1	0	0	1	0	20.783	184	NaN	NaN	NaN	NaN	NaN	NaN	NaN	NaN	323610000	185570000	138040000	0	0	0	120550000	71687000	48865000	0	0	0	166710000	90190000	76517000	0	0	0	0	0	0	36353000	23691000	12662000	0	0	0
URB1	1	9	9	9	7	6	3	4	0	1	2	1	203.28	1764	1.0238	1.0404	0.98048	0.99133	NaN	NaN	1.0462	NaN	1807200000	971410000	835800000	666740000	367080000	299670000	603260000	295700000	307560000	157480000	79438000	78044000	274220000	166680000	107540000	0	0	0	1703000	968420	734590	80486000	48082000	32404000	23316000	13461000	9855400
HCS1	1	1	1	1	1	0	0	0	0	0	0	0	78.272	683	NaN	NaN	NaN	NaN	NaN	NaN	NaN	NaN	56873000	25587000	31286000	56873000	25587000	31286000	0	0	0	0	0	0	0	0	0	0	0	0	0	0	0	0	0	0	0	0	0
MTC2	1	3	3	3	1	0	0	1	0	0	1	1	39.841	357	NaN	NaN	NaN	NaN	NaN	NaN	NaN	NaN	190290000	125870000	64414000	126180000	82221000	43960000	0	0	0	0	0	0	46693000	33010000	13682000	0	0	0	0	0	0	9407300	5852200	3555200	8006200	4789700	3216500
UTP11	1	4	4	4	3	3	2	3	0	0	0	0	29.735	250	0.88578	0.98976	0.93846	1.1662	NaN	NaN	NaN	NaN	2492200000	1384600000	1107600000	1505300000	857890000	647410000	301110000	153850000	147260000	283880000	151690000	132190000	401910000	221160000	180750000	0	0	0	0	0	0	0	0	0	0	0	0
SEG2	1	3	3	3	0	1	1	1	1	0	2	0	125.59	1132	NaN	NaN	NaN	NaN	NaN	NaN	0.45899	NaN	270620000	188450000	82161000	0	0	0	59451000	27338000	32113000	56456000	34115000	22341000	89864000	67818000	22046000	2653600	2089100	564550	0	0	0	62191000	57095000	5096300	0	0	0
BMH2	1	12	4	4	7	6	5	6	5	8	8	9	31.061	273	1.1233	1.1342	NaN	1.1039	NaN	NaN	0.88485	0.51101	35322000000	18833000000	16489000000	9627900000	5243600000	4384300000	9956100000	5161300000	4794800000	5823400000	3054400000	2769000000	8923900000	4638100000	4285800000	25065000	14841000	10225000	22112000	14764000	7348600	156310000	100050000	56256000	787140000	605880000	181260000
SCD5	1	2	2	2	1	1	1	0	0	0	1	1	97.304	872	NaN	NaN	NaN	NaN	NaN	NaN	NaN	NaN	53706000	27927000	25779000	13216000	7402900	5812900	0	0	0	7896300	4693300	3203000	0	0	0	0	0	0	0	0	0	12623000	5085100	7538300	19970000	10745000	9224900
TSA1	1	6	6	6	4	3	3	3	0	1	2	2	21.589	196	1.0876	1.1173	1.0938	1.1464	NaN	NaN	0.78754	0.88107	107120000000	56946000000	50176000000	24031000000	13603000000	10428000000	25318000000	13241000000	12077000000	30820000000	16007000000	14813000000	25993000000	13190000000	12803000000	0	0	0	869350000	849970000	19382000	32166000	20092000	12075000	58334000	34282000	24051000
WHI3	1	1	1	1	1	1	0	1	0	0	0	0	71.252	661	NaN	NaN	NaN	NaN	NaN	NaN	NaN	NaN	525890000	274800000	251090000	292670000	142930000	149740000	144080000	84114000	59963000	0	0	0	89137000	47758000	41380000	0	0	0	0	0	0	0	0	0	0	0	0
MOT2	1	5	5	5	2	0	0	0	1	2	2	4	65.353	587	0.85375	NaN	NaN	NaN	NaN	0.72708	0.69397	0.97339	331640000	218730000	112910000	111170000	82473000	28700000	0	0	0	0	0	0	0	0	0	18390000	12960000	5429600	13549000	8849000	4700200	51799000	36279000	15520000	136730000	78167000	58564000
RRP1	1	2	2	2	2	1	2	2	0	0	0	0	33.202	278	0.96013	NaN	0.83887	0.94044	NaN	NaN	NaN	NaN	1841800000	1089800000	752010000	515180000	305960000	209220000	111380000	69178000	42199000	534080000	319650000	214430000	681200000	395040000	286160000	0	0	0	0	0	0	0	0	0	0	0	0
APS1	1	2	2	2	0	1	1	1	0	0	1	0	18.152	156	NaN	NaN	1.1072	0.82982	NaN	NaN	NaN	NaN	356920000	188490000	168430000	0	0	0	0	0	0	187410000	107180000	80231000	169510000	81312000	88196000	0	0	0	0	0	0	0	0	0	0	0	0
PTC1	1	2	2	2	1	1	0	0	0	0	0	0	31.549	281	NaN	NaN	NaN	NaN	NaN	NaN	NaN	NaN	243670000	141410000	102270000	203040000	115610000	87425000	40636000	25796000	14840000	0	0	0	0	0	0	0	0	0	0	0	0	0	0	0	0	0	0
SQT1	1	5	5	5	5	4	2	1	1	1	0	0	47.166	431	0.95593	0.95311	0.89059	1.0139	NaN	NaN	NaN	NaN	3273500000	1822700000	1450800000	1045900000	587330000	458600000	923280000	500920000	422360000	755240000	441280000	313970000	547770000	292340000	255430000	0	0	0	1312700	847500	465170	0	0	0	0	0	0
UTP20	1	1	1	1	1	1	1	0	1	0	0	0	287.56	2493	0.81287	NaN	NaN	NaN	NaN	NaN	NaN	NaN	291260000	189820000	101440000	286840000	186910000	99932000	0	0	0	0	0	0	0	0	0	4415800	2909000	1506800	0	0	0	0	0	0	0	0	0
GCS1	1	16	16	16	10	8	8	8	0	0	1	2	39.296	352	1.0003	1.0989	1.0518	1.1326	NaN	NaN	0.90757	0.87086	12483000000	6724500000	5758800000	4368800000	2338100000	2030700000	2857600000	1534000000	1323600000	2963300000	1538000000	1425300000	2204300000	1257600000	946650000	0	0	0	0	0	0	39835000	23716000	16118000	49568000	33105000	16463000
THI80	1	3	3	3	3	1	2	0	0	0	0	0	36.616	319	0.78661	NaN	1.1968	NaN	NaN	NaN	NaN	NaN	519130000	282170000	236960000	202240000	119310000	82929000	117070000	61123000	55950000	199810000	101730000	98080000	0	0	0	0	0	0	0	0	0	0	0	0	0	0	0
CSG2	1	1	1	1	0	0	0	0	0	1	0	0	45.442	410	NaN	NaN	NaN	NaN	NaN	NaN	NaN	NaN	52823000	39685000	13138000	0	0	0	0	0	0	0	0	0	0	0	0	0	0	0	52823000	39685000	13138000	0	0	0	0	0	0
SKI2	1	8	8	8	7	4	2	4	0	0	1	0	146.06	1287	1.1522	1.3168	1.282	1.3931	NaN	NaN	NaN	NaN	3260000000	1592700000	1667300000	1507000000	832810000	674150000	1060500000	411250000	649220000	249940000	125020000	124920000	382750000	184180000	198580000	0	0	0	0	0	0	59868000	39419000	20449000	0	0	0
SPT10	1	1	1	1	0	0	1	0	0	0	0	0	72.921	640	NaN	NaN	NaN	NaN	NaN	NaN	NaN	NaN	0	0	0	0	0	0	0	0	0	0	0	0	0	0	0	0	0	0	0	0	0	0	0	0	0	0	0
SPT23	1	3	3	3	0	0	0	0	0	1	1	2	121.34	1082	NaN	NaN	NaN	NaN	NaN	NaN	NaN	0.88662	54766000	31840000	22926000	0	0	0	0	0	0	0	0	0	0	0	0	0	0	0	0	0	0	19650000	11693000	7957400	35115000	20147000	14968000
LRG1	1	3	3	3	1	2	0	1	0	0	0	0	116.65	1017	NaN	0.94381	NaN	NaN	NaN	NaN	NaN	NaN	117070000	79333000	37733000	36614000	27193000	9421000	80452000	52139000	28312000	0	0	0	0	0	0	0	0	0	0	0	0	0	0	0	0	0	0
MRP8	1	12	12	12	11	10	9	8	0	0	0	0	25.097	219	1.0732	1.1676	1.3549	1.3317	NaN	NaN	NaN	NaN	27608000000	13966000000	13642000000	7874600000	4352900000	3521600000	6696400000	3362400000	3334000000	5594300000	2668500000	2925800000	7443000000	3582000000	3861100000	0	0	0	0	0	0	0	0	0	0	0	0
BLI1	1	1	1	1	1	0	0	0	0	0	0	0	13.521	113	NaN	NaN	NaN	NaN	NaN	NaN	NaN	NaN	61351000	25113000	36238000	61351000	25113000	36238000	0	0	0	0	0	0	0	0	0	0	0	0	0	0	0	0	0	0	0	0	0
MPE1	1	5	5	5	2	4	2	2	0	0	0	0	49.646	441	1.2714	1.3336	1.0632	1.1216	NaN	NaN	NaN	NaN	647120000	307090000	340040000	246220000	116350000	129870000	203520000	88922000	114590000	82397000	44621000	37776000	114990000	57195000	57799000	0	0	0	0	0	0	0	0	0	0	0	0
ASK1	1	1	1	1	0	0	1	0	0	0	0	0	32.071	292	NaN	NaN	NaN	NaN	NaN	NaN	NaN	NaN	51129000	35930000	15199000	0	0	0	0	0	0	51129000	35930000	15199000	0	0	0	0	0	0	0	0	0	0	0	0	0	0	0
SFK1	1	1	1	1	0	1	1	0	0	0	0	0	40.462	353	NaN	NaN	NaN	NaN	NaN	NaN	NaN	NaN	485020000	258900000	226120000	0	0	0	278650000	148240000	130420000	206370000	110670000	95705000	0	0	0	0	0	0	0	0	0	0	0	0	0	0	0
BDF1	1	14	14	14	5	6	3	6	0	3	0	5	76.977	686	1.0873	0.91213	0.97568	1.012	NaN	2.0169	NaN	0.85753	4739600000	2606200000	2133400000	1198900000	635860000	562990000	1460900000	791440000	669430000	1074500000	611070000	463420000	919500000	518040000	401460000	0	0	0	16491000	6978900	9512200	0	0	0	69360000	42781000	26579000
2018-10-01	1	6	6	6	1	2	1	3	0	3	2	3	88.182	772	NaN	1.0801	NaN	NaN	NaN	1.0037	1.0012	0.96	3941500000	2204100000	1737400000	2126500000	1223200000	903310000	1321200000	699800000	621410000	36370000	15003000	21368000	161180000	83326000	77856000	0	0	0	269800000	166720000	103090000	15248000	9351700	5896100	11178000	6653500	4524700
APL2	1	2	2	2	1	1	2	1	1	1	1	1	81.868	726	NaN	NaN	NaN	NaN	NaN	NaN	NaN	NaN	172290000	98570000	73724000	65275000	38706000	26569000	8113400	4743300	3370100	49978000	26149000	23828000	30702000	17333000	13369000	2049400	1265400	784000	2263400	1280200	983220	13913000	9092900	4819700	0	0	0
KKQ8	1	1	1	1	0	0	0	0	0	1	0	0	82.589	724	NaN	NaN	NaN	NaN	NaN	NaN	NaN	NaN	5611000	3802100	1808900	0	0	0	0	0	0	0	0	0	0	0	0	0	0	0	5611000	3802100	1808900	0	0	0	0	0	0
SRY1	1	1	1	1	1	1	1	0	0	0	0	0	34.899	326	NaN	1.1696	2.044	NaN	NaN	NaN	NaN	NaN	182460000	81866000	100590000	42608000	26391000	16216000	67168000	35867000	31301000	72681000	19608000	53073000	0	0	0	0	0	0	0	0	0	0	0	0	0	0	0
DHR2	1	7	7	7	2	1	1	1	1	0	1	3	82.712	735	0.93221	NaN	NaN	NaN	NaN	NaN	NaN	1.1089	717040000	421390000	295640000	296950000	171060000	125890000	71157000	48782000	22375000	46677000	25908000	20769000	214420000	125100000	89321000	0	0	0	0	0	0	17476000	10914000	6563000	70351000	39624000	30728000
YNK1	1	3	3	3	1	2	2	2	0	0	1	1	17.166	153	1.1058	1.1339	1.0493	1.3439	NaN	NaN	NaN	NaN	3075200000	1611200000	1464000000	1068100000	566960000	501170000	1281500000	660440000	621090000	383650000	211560000	172090000	312940000	153990000	158950000	0	0	0	0	0	0	15132000	11133000	3998800	13836000	7092600	6743100
SIS2	1	11	11	11	7	4	6	4	1	0	2	3	62.477	562	0.90362	0.9806	0.94659	0.93871	NaN	NaN	NaN	0.8754	2896900000	1655600000	1241300000	1377000000	814180000	562790000	449940000	236270000	213670000	464350000	253850000	210500000	416710000	236930000	179780000	14677000	9889900	4787000	0	0	0	45918000	26683000	19235000	128370000	77836000	50532000
MID2	1	1	1	1	1	1	1	1	1	1	1	1	39.146	376	NaN	NaN	NaN	NaN	NaN	NaN	NaN	NaN	0	0	0	0	0	0	0	0	0	0	0	0	0	0	0	0	0	0	0	0	0	0	0	0	0	0	0
TPO5	1	1	1	1	1	1	1	1	1	0	0	0	69.242	618	NaN	NaN	NaN	NaN	NaN	NaN	NaN	NaN	242580000	116240000	126340000	29441000	21960000	7481400	58440000	29155000	29285000	102210000	39940000	62268000	48496000	21792000	26703000	3997900	3391100	606830	0	0	0	0	0	0	0	0	0
YRA2	1	6	6	6	6	3	2	2	0	0	0	0	23.777	203	0.92879	0.99682	0.99144	0.91161	NaN	NaN	NaN	NaN	3198900000	1780200000	1418800000	1306100000	725930000	580160000	634920000	368450000	266470000	607180000	329890000	277290000	650760000	355910000	294840000	0	0	0	0	0	0	0	0	0	0	0	0
DOA1	1	15	15	15	10	10	7	5	1	1	1	0	79.505	715	0.99131	0.99872	1.1167	1.2081	NaN	NaN	NaN	NaN	7797700000	4799100000	2998700000	5135100000	3237900000	1897200000	1360800000	868820000	492000000	875000000	460460000	414540000	310510000	161080000	149440000	11789000	8659100	3129900	30967000	17681000	13285000	73502000	44460000	29042000	0	0	0
SDS22	1	10	10	10	3	0	1	1	1	2	8	9	38.887	338	1.016	NaN	NaN	NaN	NaN	0.71724	1.032	0.89536	980540000	522270000	458270000	508240000	246860000	261390000	0	0	0	53161000	24884000	28277000	21438000	11640000	9798200	6000200	4275400	1724800	22952000	16429000	6522900	194820000	120640000	74181000	173930000	97548000	76379000
SNU114	1	4	4	4	3	2	3	2	0	0	0	0	114.04	1008	1.0165	3.177	0.91452	NaN	NaN	NaN	NaN	NaN	1360200000	616440000	743780000	622750000	324560000	298190000	495300000	161580000	333720000	162890000	95202000	67687000	79277000	35096000	44181000	0	0	0	0	0	0	0	0	0	0	0	0
ELF1	1	1	1	1	1	0	0	0	0	0	0	0	16.157	145	NaN	NaN	NaN	NaN	NaN	NaN	NaN	NaN	90785000	47761000	43024000	90785000	47761000	43024000	0	0	0	0	0	0	0	0	0	0	0	0	0	0	0	0	0	0	0	0	0
RSM22	1	11	11	11	2	2	2	1	2	7	7	8	72.189	628	1.2046	0.60244	1.3844	NaN	NaN	1.1427	1.3466	1.0488	1477300000	798110000	679160000	209890000	103600000	106290000	312680000	219260000	93417000	133590000	59242000	74346000	71901000	41926000	29974000	36166000	4552400	31614000	158930000	86149000	72782000	184090000	102310000	81780000	370040000	181070000	188970000
	1	1	1	1	0	0	0	1	0	0	0	0	37.357	337	NaN	NaN	NaN	NaN	NaN	NaN	NaN	NaN	0	0	0	0	0	0	0	0	0	0	0	0	0	0	0	0	0	0	0	0	0	0	0	0	0	0	0
PMU1	1	3	3	3	0	1	0	0	0	1	2	1	33.776	295	NaN	NaN	NaN	NaN	NaN	NaN	NaN	NaN	561060000	313030000	248030000	0	0	0	0	0	0	0	0	0	0	0	0	0	0	0	47742000	28475000	19267000	267460000	164110000	103350000	245850000	120450000	125410000
CAB3	1	12	12	12	3	0	4	1	1	2	3	4	65.237	571	0.95842	NaN	0.98685	NaN	NaN	0.59284	0.76322	0.99227	1057400000	598270000	459140000	334700000	194280000	140420000	0	0	0	499100000	278490000	220610000	85459000	45282000	40177000	13323000	8377500	4946000	24550000	16052000	8498100	26515000	15217000	11298000	73745000	40567000	33177000
RRP14	1	6	6	6	5	3	2	1	0	0	1	1	50.481	434	1.026	0.86168	0.81929	NaN	NaN	NaN	NaN	NaN	2033200000	1190200000	843040000	949010000	530910000	418100000	601990000	366390000	235600000	356860000	222130000	134730000	68366000	37415000	30951000	0	0	0	0	0	0	27743000	16198000	11544000	29255000	17140000	12115000
STB6	1	1	1	1	0	0	0	0	0	0	1	1	88.835	766	NaN	NaN	NaN	NaN	NaN	NaN	NaN	NaN	112770000	69182000	43584000	0	0	0	0	0	0	0	0	0	0	0	0	0	0	0	0	0	0	66688000	38342000	28347000	46078000	30841000	15238000
	1	5	5	5	3	4	4	4	0	1	0	0	19.734	180	1.262	1.0454	1.1103	1.082	NaN	NaN	NaN	NaN	6436200000	3277700000	3158500000	816220000	388570000	427640000	1843300000	913570000	929710000	1812200000	934570000	877650000	1958200000	1037900000	920250000	0	0	0	6263800	3032500	3231200	0	0	0	0	0	0
SPC42	1	4	4	4	4	1	2	0	1	0	0	0	42.271	363	1.296	NaN	1.5864	NaN	NaN	NaN	NaN	NaN	490790000	250930000	239870000	304170000	156000000	148170000	63623000	37635000	25988000	117080000	53867000	63216000	0	0	0	5918000	3426400	2491600	0	0	0	0	0	0	0	0	0
VPS24	1	6	6	6	2	2	1	1	1	3	5	2	26.242	224	1.1965	1.0483	NaN	NaN	NaN	1.3836	1.2932	0.95984	1698900000	909440000	789500000	369130000	192840000	176290000	191310000	102460000	88847000	164390000	92392000	72002000	174990000	98842000	76149000	31591000	16771000	14820000	64594000	33167000	31427000	352940000	176830000	176110000	350000000	196140000	153860000
TFA1	1	1	1	1	0	1	1	1	0	0	0	0	54.741	482	NaN	NaN	NaN	NaN	NaN	NaN	NaN	NaN	194350000	84443000	109910000	0	0	0	68129000	26145000	41984000	79876000	34592000	45284000	46344000	23707000	22637000	0	0	0	0	0	0	0	0	0	0	0	0
PAN3	1	5	5	5	3	1	0	0	2	0	0	0	76.454	679	0.96622	NaN	NaN	NaN	NaN	NaN	NaN	NaN	237930000	138090000	99841000	171500000	100670000	70832000	50804000	27039000	23765000	0	0	0	0	0	0	15627000	10384000	5243000	0	0	0	0	0	0	0	0	0
YKL023W	1	1	1	1	1	1	1	1	0	0	0	0	32.293	277	NaN	NaN	NaN	NaN	NaN	NaN	NaN	NaN	394630000	210000000	184620000	101740000	58263000	43481000	118690000	67413000	51272000	96028000	40235000	55793000	78170000	44091000	34079000	0	0	0	0	0	0	0	0	0	0	0	0
SWD2	1	1	1	1	1	1	1	1	0	0	0	0	37.122	329	NaN	NaN	NaN	NaN	NaN	NaN	NaN	NaN	1910100000	1050700000	859430000	329480000	196520000	132960000	234050000	135880000	98176000	631980000	344340000	287640000	714640000	373990000	340650000	0	0	0	0	0	0	0	0	0	0	0	0
BYE1	1	1	1	1	1	0	0	0	0	0	0	0	67.9	594	NaN	NaN	NaN	NaN	NaN	NaN	NaN	NaN	82177000	36445000	45732000	82177000	36445000	45732000	0	0	0	0	0	0	0	0	0	0	0	0	0	0	0	0	0	0	0	0	0
PRY2	1	2	2	2	1	1	1	0	0	0	1	1	33.779	329	NaN	NaN	NaN	NaN	NaN	NaN	NaN	NaN	37057000	17174000	19883000	37057000	17174000	19883000	0	0	0	0	0	0	0	0	0	0	0	0	0	0	0	0	0	0	0	0	0
YKR018C	1	3	3	3	2	2	2	1	0	0	1	0	81.753	725	0.91351	0.76538	0.64774	NaN	NaN	NaN	NaN	NaN	896690000	487550000	409140000	560710000	297370000	263350000	97167000	56507000	40661000	149970000	83680000	66288000	66183000	34083000	32100000	0	0	0	0	0	0	22659000	15911000	6747900	0	0	0
ALY1	1	3	3	3	0	0	0	1	0	1	1	2	102.54	915	NaN	NaN	NaN	NaN	NaN	NaN	NaN	0.77641	82488000	40152000	42336000	0	0	0	0	0	0	0	0	0	56254000	22856000	33397000	0	0	0	2581600	1262300	1319300	6668600	4608000	2060600	16984000	11425000	5558300
YKR023W	1	6	6	6	5	3	2	4	0	0	0	0	60.798	530	0.87675	1.1536	1.3278	0.9956	NaN	NaN	NaN	NaN	2063000000	1134900000	928150000	667560000	415400000	252160000	580190000	314940000	265250000	353560000	189310000	164250000	461720000	215230000	246490000	0	0	0	0	0	0	0	0	0	0	0	0
RPC37	1	6	6	6	5	6	5	2	0	0	0	0	32.142	282	0.99158	0.99938	0.94909	NaN	NaN	NaN	NaN	NaN	2889500000	1618400000	1271100000	1120000000	621320000	498690000	904230000	528600000	375630000	721780000	390110000	331670000	143440000	78332000	65108000	0	0	0	0	0	0	0	0	0	0	0	0
BCH2	1	3	3	3	1	1	1	1	0	0	0	0	88.043	765	NaN	NaN	NaN	NaN	NaN	NaN	NaN	NaN	253670000	129790000	123880000	0	0	0	103470000	45667000	57804000	69065000	40199000	28867000	81129000	43924000	37206000	0	0	0	0	0	0	0	0	0	0	0	0
SAP190	1	6	6	6	5	3	3	2	0	0	0	0	117.1	1033	0.98406	1.024	0.97962	0.95534	NaN	NaN	NaN	NaN	1462700000	826710000	636000000	531750000	316710000	215040000	465100000	253220000	211880000	379420000	211520000	167910000	86441000	45264000	41177000	0	0	0	0	0	0	0	0	0	0	0	0
SET3	1	4	4	4	3	1	2	0	0	0	0	0	85.479	751	1.079	NaN	1.0678	NaN	NaN	NaN	NaN	NaN	636310000	286570000	349740000	551320000	237500000	313830000	45716000	30950000	14767000	39271000	18125000	21146000	0	0	0	0	0	0	0	0	0	0	0	0	0	0	0
CAF4	1	3	3	3	1	0	0	0	0	0	1	2	72.831	643	NaN	NaN	NaN	NaN	NaN	NaN	NaN	0.95765	139510000	93212000	46303000	86827000	60043000	26784000	0	0	0	0	0	0	0	0	0	0	0	0	0	0	0	28908000	19177000	9730200	23780000	13992000	9788100
KAE1	1	2	2	2	2	2	2	2	0	0	0	0	42.748	386	0.97321	1.0091	1.071	1.091	NaN	NaN	NaN	NaN	2036300000	1110200000	926020000	784660000	446360000	338300000	545280000	278020000	267250000	423530000	245740000	177780000	282800000	140110000	142690000	0	0	0	0	0	0	0	0	0	0	0	0
SHB17	1	3	3	3	3	3	3	3	0	0	1	1	31.022	271	0.92943	0.93465	0.92594	1.0146	NaN	NaN	NaN	NaN	11010000000	5989500000	5020600000	2706900000	1483500000	1223400000	2766000000	1499200000	1266700000	2739100000	1526400000	1212700000	2777400000	1467100000	1310300000	0	0	0	0	0	0	10256000	5997700	4258400	10562000	7316300	3245500
UIP5	1	1	1	1	0	0	0	0	0	0	1	1	50.98	443	NaN	NaN	NaN	NaN	NaN	NaN	NaN	NaN	29704000	16377000	13327000	0	0	0	0	0	0	0	0	0	0	0	0	0	0	0	0	0	0	16547000	10323000	6224000	13157000	6054300	7103000
FMP46	1	3	3	3	1	0	1	0	0	0	3	2	15.65	133	NaN	NaN	NaN	NaN	NaN	NaN	1.0418	1.1946	336320000	187920000	148400000	0	0	0	0	0	0	84072000	40172000	43900000	0	0	0	0	0	0	0	0	0	74206000	46566000	27640000	178050000	101190000	76859000
UTP30	1	5	5	5	3	4	3	3	0	0	0	2	31.615	274	0.95049	0.92587	0.85388	0.97983	NaN	NaN	NaN	0.92815	2843800000	1569100000	1274700000	573340000	331670000	241680000	692760000	380950000	311810000	724610000	394630000	329980000	820650000	442090000	378560000	0	0	0	0	0	0	0	0	0	32391000	19726000	12665000
TFA2	1	3	3	3	1	0	2	3	0	0	0	0	36.985	328	NaN	NaN	1.0408	1.0489	NaN	NaN	NaN	NaN	567830000	287480000	280350000	62935000	22331000	40605000	0	0	0	286690000	155280000	131410000	218200000	109870000	108330000	0	0	0	0	0	0	0	0	0	0	0	0
LAS1	1	1	1	1	0	1	0	0	0	0	0	0	59.351	502	NaN	NaN	NaN	NaN	NaN	NaN	NaN	NaN	34186000	19789000	14397000	0	0	0	34186000	19789000	14397000	0	0	0	0	0	0	0	0	0	0	0	0	0	0	0	0	0	0
DRE2	1	7	7	7	6	6	5	4	0	0	0	0	38.542	348	0.85765	1.0296	0.89909	0.83092	NaN	NaN	NaN	NaN	8073400000	4662400000	3411000000	2767200000	1602400000	1164800000	2257000000	1287700000	969250000	1683600000	980780000	702850000	1365600000	791480000	574120000	0	0	0	0	0	0	0	0	0	0	0	0
MSA2	1	1	1	1	0	0	0	0	0	0	1	1	39.861	363	NaN	NaN	NaN	NaN	NaN	NaN	NaN	NaN	151820000	25998000	125820000	0	0	0	0	0	0	0	0	0	0	0	0	0	0	0	0	0	0	68973000	12813000	56160000	82847000	13185000	69662000
YKR078W	1	2	2	2	0	2	0	1	0	0	0	0	68.281	585	NaN	NaN	NaN	NaN	NaN	NaN	NaN	NaN	4092600000	2163400000	1929200000	0	0	0	4029500000	2122600000	1906900000	0	0	0	63086000	40743000	22343000	0	0	0	0	0	0	0	0	0	0	0	0
TRZ1	1	4	4	4	3	2	1	2	0	1	0	0	96.815	838	1.1584	1.0033	NaN	0.88481	NaN	NaN	NaN	NaN	1601400000	856870000	744530000	728020000	371030000	356980000	447940000	251020000	196910000	177310000	99337000	77978000	232990000	125100000	107890000	0	0	0	15148000	10379000	4768100	0	0	0	0	0	0
OMA1	1	1	1	1	0	1	1	1	0	0	1	1	39.328	345	NaN	NaN	NaN	NaN	NaN	NaN	NaN	NaN	207210000	113570000	93634000	0	0	0	61687000	32136000	29551000	62490000	37668000	24822000	55415000	28328000	27086000	0	0	0	0	0	0	11666000	7231100	4434900	15950000	8210200	7739700
PXL1	1	2	2	2	2	1	0	0	0	0	0	0	79.433	706	NaN	NaN	NaN	NaN	NaN	NaN	NaN	NaN	475950000	250450000	225500000	269970000	132130000	137850000	205970000	118320000	87653000	0	0	0	0	0	0	0	0	0	0	0	0	0	0	0	0	0	0
TYS1	1	17	17	17	12	11	12	11	2	0	7	4	44.019	394	1.0005	1.0289	0.99207	0.9393	NaN	NaN	0.95714	4.6913	49466000000	26937000000	22529000000	8542100000	4453500000	4088600000	10589000000	5923900000	4664800000	18351000000	10066000000	8285300000	11420000000	6379300000	5040400000	4326400	3111500	1215000	0	0	0	128610000	73300000	55307000	430990000	37733000	393260000
MRPL4	1	5	5	5	0	0	0	0	1	3	5	4	36.964	319	NaN	NaN	NaN	NaN	NaN	1.0011	0.90321	0.91003	1006600000	625150000	381430000	0	0	0	0	0	0	0	0	0	0	0	0	0	0	0	110500000	66624000	43872000	476210000	308300000	167910000	419880000	250230000	169650000
MRPL10	1	9	9	9	1	0	1	1	1	6	6	6	36.347	322	NaN	NaN	NaN	NaN	NaN	0.91576	0.82361	0.83426	977830000	512050000	465770000	0	0	0	0	0	0	110010000	48696000	61317000	176190000	34459000	141730000	4832700	3327000	1505800	163590000	108090000	55506000	316000000	190010000	125990000	207200000	127470000	79728000
MRPL37	1	3	3	3	2	2	1	1	2	3	2	3	11.949	105	NaN	NaN	NaN	NaN	NaN	1.0512	NaN	0.9153	740680000	448430000	292250000	281590000	173570000	108010000	0	0	0	0	0	0	0	0	0	21791000	15773000	6018200	57184000	33425000	23759000	170730000	102860000	67869000	209390000	122790000	86595000
APT2	1	1	1	1	1	1	0	0	0	0	0	0	19.986	181	NaN	NaN	NaN	NaN	NaN	NaN	NaN	NaN	0	0	0	0	0	0	0	0	0	0	0	0	0	0	0	0	0	0	0	0	0	0	0	0	0	0	0
PGM2	1	6	5	5	3	2	2	2	1	1	1	1	63.088	569	1.4629	1.3934	1.7899	1.5172	NaN	NaN	NaN	NaN	1491400000	877510000	613870000	769520000	540920000	228600000	280670000	134920000	145750000	240740000	107530000	133210000	197000000	92344000	104660000	0	0	0	0	0	0	3455900	1799800	1656100	0	0	0
GEF1	1	2	2	2	2	0	1	0	0	0	0	0	87.591	779	1.2245	NaN	NaN	NaN	NaN	NaN	NaN	NaN	381870000	198470000	183400000	201480000	102640000	98841000	0	0	0	180390000	95831000	84558000	0	0	0	0	0	0	0	0	0	0	0	0	0	0	0
ABZ1	1	2	2	2	0	0	0	1	0	0	0	1	88.543	787	NaN	NaN	NaN	NaN	NaN	NaN	NaN	NaN	3344900	1215600	2129300	0	0	0	0	0	0	0	0	0	0	0	0	0	0	0	0	0	0	0	0	0	3344900	1215600	2129300
SOL2	1	4	4	4	3	1	1	0	1	1	1	1	34.501	315	1.0933	NaN	NaN	NaN	NaN	NaN	NaN	NaN	610020000	291870000	318150000	545260000	252940000	292330000	0	0	0	0	0	0	0	0	0	4554500	3043500	1511000	9337600	5121200	4216400	6139300	4206700	1932600	44725000	26558000	18166000
	1	5	5	5	3	3	4	4	0	1	0	1	17.738	153	1.142	0.9181	0.90239	0.78426	NaN	NaN	NaN	NaN	2956800000	1708800000	1248100000	743130000	388890000	354240000	677360000	389020000	288340000	751200000	443930000	307260000	779780000	485050000	294730000	0	0	0	5372200	1893100	3479100	0	0	0	0	0	0
CBP4	1	4	4	4	0	0	0	0	1	2	3	1	17.532	147	NaN	NaN	NaN	NaN	NaN	1.0268	0.92049	NaN	1664000000	1040900000	623090000	0	0	0	0	0	0	0	0	0	0	0	0	167160000	127950000	39211000	92031000	58164000	33868000	1067800000	644990000	422820000	336990000	209800000	127190000
NAT2	1	6	6	6	0	0	0	0	0	4	2	2	32.804	288	NaN	NaN	NaN	NaN	NaN	1.0245	0.99498	1.2539	141410000	78804000	62607000	0	0	0	0	0	0	0	0	0	0	0	0	0	0	0	62652000	37339000	25313000	44976000	24675000	20300000	33783000	16789000	16993000
GLY1	1	8	8	8	8	4	5	4	1	1	1	1	42.815	387	1.011	0.93389	1.1018	4.0612	NaN	NaN	NaN	NaN	21000000000	9394300000	11606000000	5106700000	2748000000	2358700000	3629100000	1936700000	1692400000	5012200000	2286500000	2725600000	7093200000	2318900000	4774300000	9371700	6354600	3017100	11582000	7485100	4097200	78776000	48231000	30545000	59008000	42054000	16954000
PAM1	1	11	11	11	11	7	5	3	1	0	0	1	92.871	830	0.97933	1.0468	0.66507	1.3234	NaN	NaN	NaN	NaN	3985000000	1967000000	2017900000	1774700000	906480000	868220000	983250000	457830000	525410000	739610000	352620000	387000000	465290000	240180000	225110000	6298800	2267400	4031400	0	0	0	0	0	0	15813000	7647000	8165700
CCL1	1	1	1	1	1	0	1	1	0	0	0	0	45.21	393	NaN	NaN	NaN	NaN	NaN	NaN	NaN	NaN	163950000	81677000	82274000	40978000	22607000	18371000	0	0	0	44495000	18501000	25994000	78479000	40569000	37910000	0	0	0	0	0	0	0	0	0	0	0	0
VRP1	1	8	8	8	4	3	2	2	1	0	1	3	82.593	817	1.2858	1.0051	0.91607	0.99791	NaN	NaN	NaN	0.98979	1147500000	547880000	599570000	257070000	120200000	136870000	393540000	161590000	231960000	273980000	150620000	123360000	104840000	55611000	49233000	7281300	4301500	2979800	0	0	0	13583000	7848800	5734300	97156000	47714000	49443000
AAP1	1	6	6	6	4	2	3	4	1	1	0	0	97.661	856	0.92735	0.98624	0.83284	1.0892	NaN	NaN	NaN	NaN	2379800000	1242000000	1137800000	784310000	377950000	406360000	326920000	169470000	157450000	765150000	415360000	349790000	477930000	258360000	219570000	12168000	10829000	1338900	13327000	9984700	3342400	0	0	0	0	0	0
ADE17	1	8	5	5	3	4	4	1	2	1	2	0	65.262	592	2.8051	NaN	0.72934	NaN	NaN	NaN	NaN	NaN	2755200000	547850000	2207300000	2517600000	453270000	2064300000	157380000	55358000	102020000	80164000	39226000	40937000	0	0	0	0	0	0	0	0	0	0	0	0	0	0	0
BOI1	1	9	9	9	4	5	5	8	0	0	1	1	109.29	980	1.0946	1.0655	1.2406	1.1234	NaN	NaN	NaN	NaN	2794100000	1454500000	1339700000	740200000	383440000	356760000	521080000	293340000	227740000	862750000	426770000	435990000	640330000	332930000	307400000	0	0	0	0	0	0	15989000	9540000	6449400	13782000	8438900	5343100
PRS4	1	7	7	6	5	6	7	5	0	0	0	0	35.72	326	1.0104	0.89759	0.9276	0.94463	NaN	NaN	NaN	NaN	4365600000	2452500000	1913100000	1238000000	710340000	527700000	1076100000	598400000	477740000	1202200000	670890000	531350000	849220000	472860000	376360000	0	0	0	0	0	0	0	0	0	0	0	0
RIB1	1	2	2	2	1	0	1	1	0	0	0	0	38.332	345	NaN	NaN	NaN	NaN	NaN	NaN	NaN	NaN	331410000	171430000	159980000	0	0	0	0	0	0	184820000	101380000	83445000	146590000	70058000	76535000	0	0	0	0	0	0	0	0	0	0	0	0
UGA2	1	2	2	2	1	0	2	2	0	0	0	0	54.189	497	NaN	NaN	NaN	NaN	NaN	NaN	NaN	NaN	129070000	64285000	64787000	0	0	0	0	0	0	68506000	34254000	34252000	60565000	30030000	30535000	0	0	0	0	0	0	0	0	0	0	0	0
YPK3	1	2	2	2	0	1	0	1	0	1	0	0	59.591	525	NaN	NaN	NaN	NaN	NaN	NaN	NaN	NaN	157410000	90207000	67206000	0	0	0	132920000	75012000	57910000	0	0	0	18728000	12430000	6298100	0	0	0	5764100	2766000	2998100	0	0	0	0	0	0
SCO2	1	4	4	4	0	0	0	0	1	3	1	2	34.888	301	NaN	NaN	NaN	NaN	NaN	1.1499	NaN	0.9777	354850000	196910000	157950000	0	0	0	0	0	0	0	0	0	0	0	0	25211000	16011000	9199700	138780000	75639000	63141000	123630000	64298000	59332000	67232000	40957000	26275000
HMT1	1	7	7	7	5	5	3	2	0	0	0	1	39.786	348	0.89843	0.80718	0.88881	0.97183	NaN	NaN	NaN	NaN	3595000000	2167200000	1427800000	2007400000	1215200000	792180000	946740000	579130000	367600000	394030000	225070000	168970000	231100000	139950000	91151000	0	0	0	0	0	0	0	0	0	15777000	7851200	7925700
PDX3	1	5	5	5	5	5	5	5	0	0	2	0	26.908	228	1.016	0.95633	1.0548	1.0279	NaN	NaN	1.1936	NaN	18983000000	10726000000	8256800000	5787300000	3585000000	2202300000	5095400000	2843700000	2251700000	4646500000	2422400000	2224100000	3420900000	1855200000	1565700000	0	0	0	0	0	0	33095000	20234000	12861000	0	0	0
AKL1	1	7	7	7	4	2	5	3	0	0	0	0	123.99	1108	0.93348	NaN	1.2037	0.72645	NaN	NaN	NaN	NaN	2385600000	1723600000	661970000	1328200000	1128900000	199310000	199880000	99979000	99902000	582250000	317010000	265240000	275200000	177680000	97514000	0	0	0	0	0	0	0	0	0	0	0	0
RDH54	1	4	4	4	3	1	1	0	0	0	0	0	107.94	958	0.91252	NaN	NaN	NaN	NaN	NaN	NaN	NaN	261400000	147130000	114270000	191690000	115660000	76032000	39844000	19492000	20352000	29865000	11983000	17882000	0	0	0	0	0	0	0	0	0	0	0	0	0	0	0
MEC1	1	3	3	3	2	1	2	1	0	0	0	0	273.34	2368	1.0186	0.94074	0.96732	1.0077	NaN	NaN	NaN	NaN	18223000000	10260000000	7962700000	4531300000	2555100000	1976200000	5170600000	2879200000	2291400000	4127300000	2347600000	1779700000	4393900000	2478400000	1915500000	0	0	0	0	0	0	0	0	0	0	0	0
MAK5	1	11	11	11	3	3	6	4	0	1	4	1	87.047	773	0.98398	0.95086	0.94875	0.88906	NaN	NaN	1.1323	NaN	2912200000	1560000000	1352200000	503990000	239820000	264170000	410490000	225910000	184570000	1003700000	580650000	423020000	836210000	419090000	417130000	0	0	0	8062000	5209100	2852900	106970000	63735000	43235000	42844000	25611000	17233000
ADH5	1	2	2	2	1	2	1	1	0	0	0	0	37.648	351	1.3765	NaN	NaN	NaN	NaN	NaN	NaN	NaN	520020000	290280000	229740000	457080000	267600000	189480000	47207000	16083000	31124000	15730000	6599400	9130400	0	0	0	0	0	0	0	0	0	0	0	0	0	0	0
ARA1	1	6	6	6	3	4	3	3	0	0	1	2	38.883	344	1.0915	1.1367	1.208	1.2447	NaN	NaN	NaN	0.60778	17811000000	9698600000	8112700000	7591600000	4086100000	3505500000	4697800000	2737400000	1960400000	1855300000	970130000	885180000	3539800000	1846400000	1693400000	0	0	0	0	0	0	20242000	12362000	7880600	106610000	46329000	60285000
ARL1	1	3	3	3	2	2	3	2	0	0	1	0	20.434	183	0.87267	0.8545	0.84294	0.78184	NaN	NaN	NaN	NaN	6632300000	3960800000	2671500000	1373700000	818210000	555530000	1449600000	822220000	627350000	2087900000	1329100000	758830000	1712500000	985260000	727240000	0	0	0	0	0	0	8513500	5973000	2540500	0	0	0
POL12	1	2	2	2	0	1	0	0	0	1	0	0	78.773	705	NaN	NaN	NaN	NaN	NaN	NaN	NaN	NaN	129060000	58225000	70840000	0	0	0	127720000	57516000	70203000	0	0	0	0	0	0	0	0	0	1346300	709290	637050	0	0	0	0	0	0
TAF5	1	7	7	7	5	4	5	3	0	1	0	1	88.967	798	0.84242	1.0716	0.90403	1.526	NaN	NaN	NaN	NaN	2082700000	1165600000	917110000	559280000	291330000	267950000	554590000	337620000	216970000	552570000	324170000	228410000	325330000	167250000	158080000	0	0	0	17340000	10158000	7182300	0	0	0	73598000	35085000	38513000
GPX2	1	5	3	3	1	2	0	0	2	3	3	2	18.406	162	NaN	NaN	NaN	NaN	NaN	NaN	NaN	NaN	1505300000	377070000	1128200000	130910000	24959000	105950000	1322700000	324410000	998240000	0	0	0	0	0	0	0	0	0	31280000	15429000	15851000	20431000	12274000	8156900	0	0	0
ISW1	1	24	24	24	10	10	7	8	0	9	3	3	131.1	1129	1.0338	0.88544	1.0167	0.76751	NaN	2.4425	1.7974	0.86023	9247100000	4852800000	4394400000	3779800000	1892400000	1887400000	2314100000	1130800000	1183400000	1961000000	1158300000	802780000	897480000	526940000	370530000	0	0	0	146880000	59080000	87802000	56596000	29636000	26960000	91206000	55634000	35572000
RIB5	1	2	2	2	1	1	1	1	0	0	0	0	26.195	238	NaN	NaN	NaN	0.6926	NaN	NaN	NaN	NaN	511470000	277330000	234140000	0	0	0	217500000	114170000	103330000	181370000	94866000	86503000	112600000	68294000	44310000	0	0	0	0	0	0	0	0	0	0	0	0
CHK1	1	1	1	1	0	1	0	0	0	0	0	0	60.016	527	NaN	NaN	NaN	NaN	NaN	NaN	NaN	NaN	31280000	16206000	15074000	0	0	0	31280000	16206000	15074000	0	0	0	0	0	0	0	0	0	0	0	0	0	0	0	0	0	0
DUG2	1	3	3	3	1	1	2	1	1	1	1	1	98.07	878	NaN	NaN	1.947	NaN	NaN	1.0228	0.93599	NaN	523010000	284570000	238440000	95569000	47244000	48325000	78279000	38991000	39288000	90477000	45674000	44803000	0	0	0	0	0	0	51945000	30691000	21254000	137660000	82314000	55348000	69076000	39653000	29424000
PBP2	1	1	1	1	1	1	1	0	1	0	0	0	45.782	413	NaN	1.1814	NaN	NaN	NaN	NaN	NaN	NaN	347950000	188680000	159270000	54724000	38581000	16143000	226900000	108980000	117910000	59479000	35479000	24000000	0	0	0	6850400	5640600	1209800	0	0	0	0	0	0	0	0	0
CTP1	1	5	5	5	0	0	0	0	1	1	5	5	32.173	299	NaN	NaN	NaN	NaN	NaN	NaN	0.96504	0.87569	463240000	247320000	215910000	0	0	0	0	0	0	0	0	0	0	0	0	3258100	2412400	845660	0	0	0	142000000	66418000	75581000	317980000	178490000	139490000
APM3	1	2	2	2	0	1	1	0	0	1	0	0	54.837	483	NaN	NaN	NaN	NaN	NaN	NaN	NaN	NaN	7337100	4725700	2611400	0	0	0	0	0	0	0	0	0	0	0	0	0	0	0	7337100	4725700	2611400	0	0	0	0	0	0
MIX23	1	2	2	2	1	0	0	0	0	1	0	0	22.965	196	0.55021	NaN	NaN	NaN	NaN	NaN	NaN	NaN	512280000	354520000	157750000	462570000	317710000	144860000	0	0	0	0	0	0	0	0	0	0	0	0	49707000	36817000	12890000	0	0	0	0	0	0
RTG3	1	3	3	3	1	2	2	2	0	0	0	0	54.139	486	NaN	NaN	NaN	NaN	NaN	NaN	NaN	NaN	483990000	270700000	213290000	104600000	54660000	49936000	64859000	29872000	34987000	173230000	101430000	71802000	141300000	84733000	56568000	0	0	0	0	0	0	0	0	0	0	0	0
SFT2	1	1	1	1	0	0	0	0	1	0	1	1	24.274	215	NaN	NaN	NaN	NaN	NaN	NaN	0.71349	NaN	672580000	453640000	218940000	0	0	0	0	0	0	0	0	0	0	0	0	142200000	121660000	20541000	0	0	0	257290000	172400000	84893000	273080000	159570000	113510000
BRN1	1	2	2	2	2	1	1	0	0	0	0	0	86.215	754	1.2049	0.78046	NaN	NaN	NaN	NaN	NaN	NaN	891150000	502430000	388720000	408160000	210620000	197550000	246280000	150700000	95580000	236710000	141110000	95592000	0	0	0	0	0	0	0	0	0	0	0	0	0	0	0
MRP21	1	5	5	5	1	1	1	1	1	3	4	2	20.394	177	NaN	NaN	NaN	NaN	NaN	0.99275	1.0294	1.2236	2218100000	1331700000	886400000	118480000	59101000	59379000	107020000	51646000	55377000	99975000	64206000	35769000	79724000	47914000	31810000	61324000	46164000	15159000	154900000	94039000	60859000	1245900000	773080000	472840000	350780000	195580000	155200000
	1	2	2	2	0	0	0	0	0	1	1	0	51.996	466	NaN	NaN	NaN	NaN	NaN	NaN	NaN	NaN	30448000	14815000	15633000	0	0	0	0	0	0	0	0	0	0	0	0	0	0	0	7549300	4585500	2963900	22899000	10230000	12669000	0	0	0
ALG3	1	1	1	1	0	0	0	0	1	0	0	0	52.86	458	NaN	NaN	NaN	NaN	NaN	NaN	NaN	NaN	0	0	0	0	0	0	0	0	0	0	0	0	0	0	0	0	0	0	0	0	0	0	0	0	0	0	0
PSY4	1	3	3	3	2	1	2	3	0	0	0	0	50.655	441	NaN	NaN	NaN	NaN	NaN	NaN	NaN	NaN	183480000	106710000	76773000	0	0	0	61569000	37426000	24143000	79739000	44438000	35301000	42170000	24842000	17328000	0	0	0	0	0	0	0	0	0	0	0	0
	1	7	7	7	5	4	4	5	0	0	2	0	29.123	257	0.95136	1.0556	1.0005	1.1244	NaN	NaN	NaN	NaN	16293000000	8919500000	7373800000	8145600000	4619200000	3526400000	3711600000	1930400000	1781200000	2629200000	1422500000	1206600000	1795800000	941650000	854170000	0	0	0	0	0	0	10975000	5650700	5324500	0	0	0
STU1	1	2	2	2	1	0	1	0	0	0	0	0	174.18	1513	NaN	NaN	NaN	NaN	NaN	NaN	NaN	NaN	0	0	0	0	0	0	0	0	0	0	0	0	0	0	0	0	0	0	0	0	0	0	0	0	0	0	0
	1	5	5	5	5	3	4	2	0	0	0	0	12.401	106	0.79632	1.0357	2.8517	NaN	NaN	NaN	NaN	NaN	8987600000	1371200000	7616300000	3933200000	834280000	3098900000	398350000	222070000	176280000	4530700000	232810000	4297900000	125280000	82074000	43206000	0	0	0	0	0	0	0	0	0	0	0	0
LSM2	1	3	3	3	1	3	1	1	1	1	0	1	11.163	95	NaN	0.87321	NaN	NaN	NaN	NaN	NaN	NaN	679810000	376460000	303350000	0	0	0	347520000	176050000	171470000	182870000	118000000	64868000	0	0	0	64923000	34280000	30643000	73967000	43537000	30430000	0	0	0	10526000	4586800	5939100
RRN10	1	1	1	1	1	1	0	0	0	0	0	0	16.505	145	NaN	NaN	NaN	NaN	NaN	NaN	NaN	NaN	175910000	95901000	80006000	95373000	55141000	40231000	80535000	40760000	39774000	0	0	0	0	0	0	0	0	0	0	0	0	0	0	0	0	0	0
NCL1	1	18	18	18	16	13	10	12	0	0	1	2	77.878	684	0.97367	0.95275	0.97753	0.97526	NaN	NaN	NaN	NaN	13957000000	7751100000	6205600000	5350600000	3023500000	2327200000	3342800000	1818200000	1524600000	2817300000	1539600000	1277700000	2358500000	1320000000	1038400000	0	0	0	0	0	0	61454000	34447000	27007000	26007000	15412000	10595000
LDB7	1	1	1	1	1	1	1	0	0	0	0	1	19.792	180	NaN	NaN	NaN	NaN	NaN	NaN	NaN	NaN	153380000	85181000	68200000	61496000	31660000	29837000	42388000	22444000	19944000	47837000	30033000	17804000	0	0	0	0	0	0	0	0	0	0	0	0	1660000	1045100	614920
KAP104	1	6	6	6	5	3	3	4	0	0	0	0	103.68	918	0.97798	0.9764	1.0094	0.9949	NaN	NaN	NaN	NaN	4467000000	2434300000	2032700000	1042200000	544810000	497380000	863000000	461590000	401420000	1032900000	594690000	438170000	1529000000	833230000	695720000	0	0	0	0	0	0	0	0	0	0	0	0
RKM3	1	2	2	2	2	0	0	0	0	0	0	0	62.593	552	NaN	NaN	NaN	NaN	NaN	NaN	NaN	NaN	0	0	0	0	0	0	0	0	0	0	0	0	0	0	0	0	0	0	0	0	0	0	0	0	0	0	0
FIG1	1	1	1	1	0	0	0	0	1	1	1	1	33.775	298	NaN	NaN	NaN	NaN	NaN	NaN	NaN	NaN	215470000	126120000	89351000	0	0	0	0	0	0	0	0	0	0	0	0	45475000	30560000	14915000	40965000	23542000	17423000	62795000	32428000	30367000	66234000	39588000	26646000
TCM62	1	7	7	7	0	2	2	1	0	2	1	1	64.251	572	NaN	0.93093	NaN	NaN	NaN	0.98478	NaN	NaN	277870000	155090000	122780000	0	0	0	70790000	46550000	24240000	64386000	37162000	27224000	81220000	33775000	47445000	0	0	0	41103000	24657000	16446000	6104900	3591100	2513800	14264000	9357300	4907100
ZTA1	1	1	1	1	0	1	1	0	0	0	0	0	37.018	334	NaN	NaN	NaN	NaN	NaN	NaN	NaN	NaN	158570000	67958000	90615000	0	0	0	66438000	27662000	38775000	92135000	40296000	51840000	0	0	0	0	0	0	0	0	0	0	0	0	0	0	0
	1	5	5	5	5	4	2	2	0	0	0	0	40.295	358	1.2311	1.2625	NaN	NaN	NaN	NaN	NaN	NaN	2676300000	1334200000	1342100000	1601500000	833430000	768100000	886780000	411900000	474890000	85196000	39415000	45781000	102820000	49485000	53333000	0	0	0	0	0	0	0	0	0	0	0	0
MUM2	1	2	2	2	0	1	0	0	0	0	1	0	41.433	366	NaN	NaN	NaN	NaN	NaN	NaN	NaN	NaN	71823000	41235000	30588000	0	0	0	38362000	22782000	15579000	0	0	0	0	0	0	0	0	0	0	0	0	33461000	18452000	15009000	0	0	0
UBP14	1	6	6	6	3	3	4	3	0	0	0	0	88.629	781	0.98891	1.1052	1.2776	1.35	NaN	NaN	NaN	NaN	1649600000	841160000	808470000	349780000	199940000	149840000	294290000	149870000	144430000	606610000	292080000	314520000	398950000	199270000	199680000	0	0	0	0	0	0	0	0	0	0	0	0
ALG14	1	2	2	2	0	1	0	0	1	1	1	0	27.035	237	NaN	NaN	NaN	NaN	NaN	NaN	NaN	NaN	50634000	38769000	11865000	0	0	0	25324000	21845000	3478400	0	0	0	0	0	0	5416200	3428100	1988100	3619200	2236400	1382800	16275000	11259000	5015500	0	0	0
RFC5	1	2	2	2	2	2	2	2	0	0	0	0	39.941	354	0.91211	0.86277	1.0265	0.75964	NaN	NaN	NaN	NaN	2901100000	1664100000	1237000000	679820000	399710000	280110000	914920000	520530000	394400000	471040000	212160000	258880000	835360000	531710000	303650000	0	0	0	0	0	0	0	0	0	0	0	0
PBY1	1	9	9	9	6	3	2	1	0	0	1	2	86.352	753	0.94485	0.8451	0.96193	0.96527	NaN	NaN	NaN	0.97471	2164900000	1193100000	971770000	1076000000	583760000	492190000	329660000	187870000	141790000	359590000	191640000	167950000	362920000	211380000	151540000	0	0	0	0	0	0	0	0	0	36765000	18460000	18305000
RXT2	1	2	2	2	0	0	0	0	0	0	2	0	48.629	430	NaN	NaN	NaN	NaN	NaN	NaN	1.3862	NaN	55333000	29733000	25599000	0	0	0	0	0	0	0	0	0	0	0	0	0	0	0	0	0	0	55333000	29733000	25599000	0	0	0
FES1	1	6	6	6	5	4	5	3	0	0	0	0	32.604	290	0.99722	1.0029	1.022	1.1395	NaN	NaN	NaN	NaN	2574900000	1400800000	1174100000	811160000	439600000	371560000	668410000	350490000	317920000	876820000	501360000	375460000	218520000	109400000	109130000	0	0	0	0	0	0	0	0	0	0	0	0
EXO84	1	5	5	5	1	1	2	1	1	1	0	0	85.537	753	NaN	NaN	NaN	NaN	NaN	NaN	NaN	NaN	685310000	458680000	226630000	66644000	66644000	0	252510000	157950000	94557000	226020000	137160000	88860000	128600000	88157000	40446000	4371100	3315100	1056000	7166900	5456400	1710500	0	0	0	0	0	0
SIF2	1	1	1	1	1	0	0	1	0	0	0	0	59.16	535	NaN	NaN	NaN	NaN	NaN	NaN	NaN	NaN	57825000	31613000	26212000	27591000	15653000	11938000	0	0	0	0	0	0	30234000	15960000	14274000	0	0	0	0	0	0	0	0	0	0	0	0
AIM3	1	3	3	3	1	0	2	2	0	0	0	0	103.86	947	NaN	NaN	1.006	NaN	NaN	NaN	NaN	NaN	219720000	130210000	89507000	62394000	32938000	29456000	0	0	0	92897000	56495000	36402000	64431000	40782000	23649000	0	0	0	0	0	0	0	0	0	0	0	0
ATG14	1	1	1	1	0	0	0	0	0	1	1	1	40.453	344	NaN	NaN	NaN	NaN	NaN	NaN	NaN	NaN	11981000	8128300	3853200	0	0	0	0	0	0	0	0	0	0	0	0	0	0	0	2560300	1959900	600430	9421200	6168400	3252700	0	0	0
OPY1	1	1	1	1	0	0	0	0	0	1	1	1	37.739	328	NaN	NaN	NaN	NaN	NaN	NaN	NaN	NaN	162860000	117550000	45312000	0	0	0	0	0	0	0	0	0	0	0	0	0	0	0	10823000	8434400	2388100	142550000	103510000	39047000	9488200	5611200	3877000
CCZ1	1	3	3	3	0	0	0	0	1	1	2	3	80.731	704	NaN	NaN	NaN	NaN	NaN	NaN	NaN	NaN	73104000	50558000	22546000	0	0	0	0	0	0	0	0	0	0	0	0	7296100	5151400	2144700	2694000	1819200	874820	35862000	25609000	10253000	27251000	17978000	9273200
HSL7	1	3	3	3	0	0	0	1	0	1	2	1	95.152	827	NaN	NaN	NaN	NaN	NaN	NaN	1.2322	NaN	34894000	20631000	14262000	0	0	0	0	0	0	0	0	0	0	0	0	0	0	0	1175800	809000	366760	22608000	12834000	9773500	11110000	6987700	4122100
	1	4	4	4	0	0	0	0	1	1	2	3	60.468	524	NaN	NaN	NaN	NaN	NaN	NaN	0.83698	0.70511	299260000	178720000	120530000	0	0	0	0	0	0	0	0	0	0	0	0	4983300	2818300	2165000	33529000	17954000	15575000	147580000	95787000	51794000	113160000	62164000	51000000
APD1	1	7	7	7	3	3	2	1	0	0	2	4	35.758	316	1.0228	0.91438	1.0191	0.96833	NaN	NaN	0.90881	0.82067	2277000000	1246500000	1030500000	613260000	341910000	271350000	610770000	315010000	295760000	554800000	297990000	256810000	194520000	106820000	87696000	0	0	0	0	0	0	124680000	80650000	44034000	178960000	104130000	74829000
SPP381	1	1	1	1	0	1	1	0	0	0	0	0	33.771	291	NaN	NaN	NaN	NaN	NaN	NaN	NaN	NaN	298760000	146710000	152050000	0	0	0	162240000	76060000	86180000	136520000	70651000	65869000	0	0	0	0	0	0	0	0	0	0	0	0	0	0	0
FZO1	1	9	9	9	2	1	1	1	2	5	5	2	97.807	855	1.0221	NaN	NaN	NaN	NaN	1.0237	1.107	1.0043	1411300000	793460000	617860000	678620000	396780000	281840000	0	0	0	47347000	29591000	17756000	53723000	27560000	26163000	27551000	21156000	6394500	47178000	30866000	16311000	416110000	219960000	196150000	140790000	67549000	73238000
MBA1	1	2	2	2	0	0	1	0	1	1	0	0	31.811	278	NaN	NaN	NaN	NaN	NaN	NaN	NaN	NaN	43517000	29161000	14356000	0	0	0	0	0	0	0	0	0	0	0	0	18122000	13273000	4849400	25395000	15889000	9506800	0	0	0	0	0	0
GDT1	1	2	2	2	2	0	0	1	0	0	1	0	30.34	280	1.009	NaN	NaN	NaN	NaN	NaN	NaN	NaN	570970000	334150000	236820000	500830000	290460000	210370000	0	0	0	0	0	0	56047000	34991000	21055000	0	0	0	0	0	0	14094000	8696700	5397700	0	0	0
MED8	1	1	1	1	1	0	0	0	0	0	0	0	25.268	223	NaN	NaN	NaN	NaN	NaN	NaN	NaN	NaN	678690000	264840000	413840000	678690000	264840000	413840000	0	0	0	0	0	0	0	0	0	0	0	0	0	0	0	0	0	0	0	0	0
	1	2	2	2	0	1	1	2	0	0	0	0	24.203	217	NaN	NaN	NaN	0.91122	NaN	NaN	NaN	NaN	324040000	158740000	165290000	0	0	0	68000000	33259000	34741000	115310000	58833000	56478000	140720000	66652000	74073000	0	0	0	0	0	0	0	0	0	0	0	0
SDS24	1	3	3	3	2	2	2	2	0	0	0	1	57.187	527	1.1183	1.3432	0.99611	1.1935	NaN	NaN	NaN	NaN	3640900000	1798700000	1842100000	835230000	396010000	439220000	870730000	436480000	434250000	1009200000	534290000	474930000	921420000	429530000	491890000	0	0	0	0	0	0	0	0	0	4268200	2414200	1854000
	1	1	1	1	0	0	0	1	0	0	0	0	101.24	900	NaN	NaN	NaN	NaN	NaN	NaN	NaN	NaN	0	0	0	0	0	0	0	0	0	0	0	0	0	0	0	0	0	0	0	0	0	0	0	0	0	0	0
	1	1	1	1	1	0	1	0	0	0	0	0	83.76	731	NaN	NaN	NaN	NaN	NaN	NaN	NaN	NaN	41540000	25798000	15742000	41540000	25798000	15742000	0	0	0	0	0	0	0	0	0	0	0	0	0	0	0	0	0	0	0	0	0
	1	3	3	3	1	0	1	0	1	1	0	0	27.576	238	NaN	NaN	NaN	NaN	NaN	NaN	NaN	NaN	278070000	145540000	132530000	127060000	72323000	54741000	0	0	0	147820000	71202000	76614000	0	0	0	1407600	761170	646400	1779000	1253700	525270	0	0	0	0	0	0
RRT2	1	2	2	2	0	0	0	1	0	0	1	0	43.308	387	NaN	NaN	NaN	NaN	NaN	NaN	NaN	NaN	44649000	23002000	21647000	0	0	0	0	0	0	0	0	0	44649000	23002000	21647000	0	0	0	0	0	0	0	0	0	0	0	0
ENP1	1	7	7	7	7	6	6	5	1	0	0	0	55.136	483	0.94639	0.90857	0.94612	0.93723	NaN	NaN	NaN	NaN	15275000000	8710300000	6564700000	4030400000	2422600000	1607800000	3445200000	1965600000	1479600000	4176000000	2333200000	1842800000	3621100000	1986600000	1634500000	2244000	2244000	0	0	0	0	0	0	0	0	0	0
MTC4	1	1	1	1	0	0	0	0	0	1	1	0	79.027	694	NaN	NaN	NaN	NaN	NaN	NaN	NaN	NaN	26154000	16772000	9382200	0	0	0	0	0	0	0	0	0	0	0	0	0	0	0	4414800	2746700	1668100	21740000	14026000	7714100	0	0	0
RGD1	1	10	10	10	5	2	5	3	0	2	1	2	74.618	666	0.84715	1.1706	0.97292	0.80563	NaN	1.4701	1.683	0.82764	1594000000	869310000	724680000	435120000	245230000	189890000	160860000	79130000	81727000	565460000	295340000	270110000	330100000	195580000	134530000	0	0	0	59377000	33014000	26363000	29078000	13369000	15708000	14005000	7649200	6356300
TAE1	1	1	1	1	1	1	1	1	0	0	0	0	26.067	232	NaN	NaN	NaN	0.85356	NaN	NaN	NaN	NaN	1597400000	878740000	718700000	305410000	153030000	152380000	275520000	147550000	127960000	498120000	300440000	197680000	518390000	277720000	240670000	0	0	0	0	0	0	0	0	0	0	0	0
MIC12	1	5	5	5	1	1	1	1	1	2	3	4	12.388	106	NaN	NaN	0.91385	NaN	NaN	0.91094	0.94405	1.0147	1377300000	813900000	563400000	150200000	75912000	74290000	169350000	103200000	66153000	358650000	198790000	159870000	167640000	96010000	71627000	36980000	26737000	10244000	75754000	48436000	27318000	169740000	114140000	55602000	248990000	150690000	98303000
REI1	1	3	3	3	1	0	0	0	0	0	0	2	45.862	393	NaN	NaN	NaN	NaN	NaN	NaN	NaN	0.65219	143600000	94941000	48664000	126610000	84849000	41757000	0	0	0	0	0	0	0	0	0	0	0	0	0	0	0	0	0	0	16998000	10091000	6907100
SDH8	1	1	1	1	1	1	1	1	0	0	0	0	15.504	138	NaN	0.99133	NaN	1.1826	NaN	NaN	NaN	NaN	536740000	287500000	249240000	111730000	62181000	49547000	173840000	105860000	67980000	97239000	47193000	50046000	153940000	72267000	81670000	0	0	0	0	0	0	0	0	0	0	0	0
HSM3	1	4	4	4	3	2	1	3	0	0	0	0	55.542	480	1.0388	0.94069	NaN	1.0356	NaN	NaN	NaN	NaN	944380000	499360000	445020000	316210000	170600000	145600000	305610000	165210000	140400000	175310000	88626000	86689000	147250000	74923000	72323000	0	0	0	0	0	0	0	0	0	0	0	0
UBX7	1	7	7	7	1	1	2	1	0	0	5	2	50.03	436	1.2613	NaN	0.3766	NaN	NaN	NaN	1.195	1.1227	2267800000	1654000000	613860000	161670000	78875000	82793000	101630000	48217000	53415000	1319900000	1128700000	191170000	201670000	106270000	95398000	0	0	0	0	0	0	393860000	238180000	155680000	89144000	53739000	35405000
PAF1	1	8	8	8	5	5	3	3	0	0	1	0	51.8	445	0.93218	0.97617	1.2428	1.0065	NaN	NaN	NaN	NaN	3249000000	1815800000	1433200000	1108300000	637440000	470860000	955790000	538230000	417560000	611020000	317360000	293660000	539690000	307430000	232260000	0	0	0	0	0	0	34190000	15350000	18839000	0	0	0
SAF1	1	1	1	1	0	0	1	1	0	0	0	0	70.495	637	NaN	NaN	NaN	NaN	NaN	NaN	NaN	NaN	51234000	24719000	26515000	0	0	0	0	0	0	24339000	11026000	13313000	26895000	13693000	13202000	0	0	0	0	0	0	0	0	0	0	0	0
	1	1	1	1	0	0	0	0	0	1	1	1	47.506	427	NaN	NaN	NaN	NaN	NaN	0.97752	1.2355	0.96951	101640000	58883000	42759000	0	0	0	0	0	0	0	0	0	0	0	0	0	0	0	5672400	3560000	2112400	28717000	16063000	12654000	67252000	39260000	27992000
BSD2	1	1	1	1	0	0	0	0	0	0	1	1	35.763	321	NaN	NaN	NaN	NaN	NaN	NaN	NaN	NaN	67898000	44944000	22954000	0	0	0	0	0	0	0	0	0	0	0	0	0	0	0	0	0	0	44152000	31180000	12972000	23746000	13764000	9981600
TPS3	1	9	9	9	5	4	6	2	0	0	0	0	118.83	1054	1.0425	1.0533	1.1869	1.0474	NaN	NaN	NaN	NaN	7912800000	1597100000	6315700000	994900000	647170000	347730000	3868500000	494640000	3373800000	2878900000	366310000	2512500000	170640000	89020000	81617000	0	0	0	0	0	0	0	0	0	0	0	0
TSL1	1	6	6	6	4	3	3	2	0	0	0	0	123.02	1098	1.5546	1.459	1.9848	NaN	NaN	NaN	NaN	NaN	1444800000	651620000	793200000	548240000	255120000	293120000	486020000	218810000	267210000	339410000	145070000	194350000	71157000	32634000	38523000	0	0	0	0	0	0	0	0	0	0	0	0
LEO1	1	9	9	9	7	3	4	2	0	0	0	0	53.919	464	0.90387	0.87434	0.97771	0.75447	NaN	NaN	NaN	NaN	3929900000	2266600000	1663300000	1437100000	778220000	658900000	719000000	406090000	312920000	1089900000	672130000	417740000	683920000	410200000	273710000	0	0	0	0	0	0	0	0	0	0	0	0
RIM11	1	3	3	3	0	3	1	0	1	0	0	0	43.004	370	NaN	0.87143	NaN	NaN	NaN	NaN	NaN	NaN	602080000	291450000	310630000	0	0	0	454970000	240410000	214560000	76925000	42812000	34113000	0	0	0	70188000	8227600	61960000	0	0	0	0	0	0	0	0	0
YGP1	1	5	5	5	1	1	3	4	0	1	1	0	37.327	354	NaN	NaN	2.2204	2.4736	NaN	NaN	NaN	NaN	829270000	281450000	547820000	275200000	82768000	192430000	0	0	0	141670000	51240000	90428000	402470000	144970000	257500000	0	0	0	1576700	428280	1148400	8350600	2042500	6308000	0	0	0
PRS2	1	3	2	2	2	2	1	1	0	0	0	0	34.765	318	1.0189	1.6898	NaN	NaN	NaN	NaN	NaN	NaN	1633700000	894860000	738800000	1275200000	745450000	529730000	358490000	149410000	209080000	0	0	0	0	0	0	0	0	0	0	0	0	0	0	0	0	0	0
RCK2	1	6	6	6	5	4	4	3	0	0	1	1	68.061	610	1.0295	1.0144	0.99194	0.85006	NaN	NaN	0.96318	NaN	2382800000	1199200000	1183600000	600320000	269160000	331160000	1188800000	635040000	553750000	410230000	199490000	210750000	158670000	81172000	77501000	0	0	0	0	0	0	9485600	5391600	4094000	15298000	8967800	6330100
PRE3	1	3	3	3	2	0	0	0	0	1	0	1	23.547	215	NaN	NaN	NaN	NaN	NaN	NaN	NaN	NaN	163680000	67939000	95744000	136170000	56334000	79837000	0	0	0	0	0	0	0	0	0	0	0	0	5500600	3634600	1866000	0	0	0	22011000	7970200	14041000
URA8	1	3	3	3	3	2	2	1	0	0	0	0	64.51	578	0.947	NaN	1.058	NaN	NaN	NaN	NaN	NaN	1041400000	543500000	497930000	427490000	237530000	189950000	245320000	132530000	112790000	277450000	135620000	141830000	91166000	37813000	53354000	0	0	0	0	0	0	0	0	0	0	0	0
PCM1	1	9	9	9	7	6	4	5	1	0	1	0	62.066	557	1.0246	1.0564	0.94619	1.2096	NaN	NaN	NaN	NaN	10806000000	5184500000	5621900000	4286200000	2104100000	2182100000	3118900000	1451000000	1667900000	2044100000	925590000	1118500000	1347800000	697020000	650810000	1638400	943190	695210	0	0	0	7694000	5817000	1877000	0	0	0
RFC3	1	9	9	9	5	3	2	2	1	1	3	3	38.203	340	0.90869	0.8858	0.67174	0.94261	NaN	NaN	1.0063	0.88958	1857700000	1060200000	797510000	846460000	469820000	376640000	355730000	201820000	153910000	244410000	164320000	80092000	191800000	108240000	83562000	6595300	4598400	1996900	10733000	5635600	5097400	76138000	42860000	33278000	125850000	62914000	62934000
HIS2	1	1	1	1	0	0	1	1	0	0	0	0	38.581	335	NaN	NaN	NaN	NaN	NaN	NaN	NaN	NaN	418290000	226740000	191550000	0	0	0	0	0	0	252420000	145630000	106800000	165870000	81108000	84759000	0	0	0	0	0	0	0	0	0	0	0	0
ATX1	1	2	2	2	1	2	1	1	0	0	0	0	8.2206	73	NaN	0.96057	NaN	NaN	NaN	NaN	NaN	NaN	567120000	300370000	266750000	146100000	76346000	69755000	169530000	96184000	73343000	121240000	65978000	55259000	130260000	61864000	68395000	0	0	0	0	0	0	0	0	0	0	0	0
SRP68	1	9	9	9	3	2	1	1	1	2	4	5	69.005	599	1.0592	1.0249	0.9938	0.89989	NaN	0.8597	0.70247	0.98122	2189800000	1243500000	946300000	825450000	460870000	364570000	306080000	170860000	135230000	363320000	190230000	173100000	385300000	214460000	170830000	20850000	11866000	8983300	83358000	62099000	21259000	91180000	64234000	26946000	114310000	68929000	45382000
KIC1	1	2	2	2	0	1	0	1	0	0	0	0	117.06	1080	NaN	NaN	NaN	NaN	NaN	NaN	NaN	NaN	45867000	20531000	25336000	0	0	0	6315200	4582300	1733000	0	0	0	39552000	15949000	23603000	0	0	0	0	0	0	0	0	0	0	0	0
PPX1	1	8	8	8	4	4	3	3	0	1	3	2	45.051	397	0.94234	1.0843	1.0459	1.0549	NaN	NaN	0.85792	1.0352	3792200000	2056200000	1736000000	1175500000	659740000	515770000	1106300000	592900000	513390000	1122700000	601120000	521610000	325400000	162080000	163310000	0	0	0	3107600	2288400	819260	39675000	25532000	14142000	19501000	12505000	6995800
APM2	1	2	2	2	1	1	0	0	0	1	0	0	69.989	605	NaN	NaN	NaN	NaN	NaN	NaN	NaN	NaN	107830000	60691000	47144000	58592000	33244000	25348000	19749000	10311000	9438300	0	0	0	0	0	0	0	0	0	29493000	17136000	12358000	0	0	0	0	0	0
STP2	1	1	1	1	0	0	0	1	0	0	0	0	60.791	541	NaN	NaN	NaN	NaN	NaN	NaN	NaN	NaN	43251000	16306000	26945000	0	0	0	0	0	0	0	0	0	43251000	16306000	26945000	0	0	0	0	0	0	0	0	0	0	0	0
DIA4	1	5	5	5	1	1	1	1	0	2	2	5	50.389	446	1.1344	0.96831	0.94474	NaN	NaN	0.99699	1.1266	0.9449	358260000	200200000	158060000	60117000	31218000	28899000	130460000	72608000	57851000	24943000	14487000	10456000	6466600	3734700	2731900	0	0	0	7542900	4555300	2987600	23863000	13643000	10220000	104870000	59957000	44915000
INM1	1	3	3	3	3	3	3	3	0	0	0	0	32.823	295	0.94684	1.0344	0.99552	1.0452	NaN	NaN	NaN	NaN	3247200000	1993100000	1254100000	388110000	210170000	177940000	1390000000	1041100000	348900000	736800000	363170000	373630000	732290000	378620000	353670000	0	0	0	0	0	0	0	0	0	0	0	0
RRP3	1	8	8	8	6	6	6	5	1	1	3	3	55.968	501	0.89383	0.96733	0.84455	0.86311	NaN	NaN	1.2237	1.3649	12666000000	7089000000	5577100000	4235700000	2370000000	1865700000	3256400000	1833700000	1422700000	2882400000	1603700000	1278800000	2024400000	1158600000	865810000	14113000	8666200	5447200	8926200	4936800	3989400	113960000	42508000	71456000	130150000	66977000	63169000
MSR1	1	2	2	2	0	0	0	0	0	0	2	2	73.693	643	NaN	NaN	NaN	NaN	NaN	NaN	0.88515	0.77865	156480000	101350000	55127000	0	0	0	0	0	0	0	0	0	0	0	0	0	0	0	0	0	0	110170000	71151000	39020000	46310000	30203000	16107000
YHR112C	1	1	1	1	1	1	1	1	0	1	0	1	42.445	378	NaN	NaN	1.0979	NaN	NaN	NaN	NaN	NaN	1572500000	864040000	708440000	285100000	172450000	112650000	229100000	116090000	113010000	535900000	289190000	246710000	464710000	231750000	232970000	0	0	0	23630000	21429000	2201700	0	0	0	34037000	33138000	899000
DBP8	1	2	2	2	2	2	1	1	0	0	0	1	47.878	431	0.79791	0.71171	NaN	NaN	NaN	NaN	NaN	NaN	1509800000	879830000	629980000	670330000	371340000	298990000	504080000	315270000	188810000	89722000	51000000	38722000	239520000	139740000	99775000	0	0	0	0	0	0	0	0	0	6164700	2474700	3690000
EFM1	1	1	1	1	1	0	0	0	0	0	0	0	67.452	585	NaN	NaN	NaN	NaN	NaN	NaN	NaN	NaN	71117000	36936000	34181000	71117000	36936000	34181000	0	0	0	0	0	0	0	0	0	0	0	0	0	0	0	0	0	0	0	0	0
ECM29	1	3	3	3	3	1	0	1	0	0	0	0	210.43	1868	1.1213	1.2695	NaN	NaN	NaN	NaN	NaN	NaN	721340000	352730000	368610000	537210000	250300000	286910000	184130000	102430000	81708000	0	0	0	0	0	0	0	0	0	0	0	0	0	0	0	0	0	0
RIM4	1	2	2	2	1	0	0	1	0	0	0	0	80.108	713	NaN	NaN	NaN	NaN	NaN	NaN	NaN	NaN	159720000	84755000	74968000	47813000	22991000	24822000	0	0	0	0	0	0	111910000	61764000	50146000	0	0	0	0	0	0	0	0	0	0	0	0
YHL017W	1	1	1	1	1	1	0	0	1	0	1	1	61.205	532	1.3163	1.2866	NaN	NaN	NaN	NaN	NaN	NaN	816710000	401090000	415610000	623120000	299080000	324040000	167590000	85956000	81632000	0	0	0	0	0	0	12703000	8595200	4108100	0	0	0	8847500	5205500	3642000	4444300	2254400	2189800
YLF2	1	5	5	5	1	1	2	1	0	3	1	3	45.714	405	NaN	NaN	1.3565	NaN	NaN	1.0734	NaN	0.57273	1893800000	1219200000	674570000	766120000	526790000	239330000	425500000	272310000	153190000	466370000	273890000	192480000	122300000	73173000	49125000	0	0	0	37857000	24393000	13464000	25099000	16607000	8492100	50571000	32079000	18492000
OTU2	1	8	8	8	6	4	5	2	0	0	0	0	36.113	307	0.95897	0.92957	0.98596	0.84367	NaN	NaN	NaN	NaN	2475900000	1360600000	1115300000	878230000	497550000	380670000	577720000	319000000	258720000	730830000	394200000	336630000	289110000	149820000	139290000	0	0	0	0	0	0	0	0	0	0	0	0
YAP3	1	1	1	1	0	1	0	1	0	0	0	0	37.955	330	NaN	NaN	NaN	NaN	NaN	NaN	NaN	NaN	147410000	77050000	70362000	0	0	0	80223000	44124000	36100000	0	0	0	67189000	32927000	34262000	0	0	0	0	0	0	0	0	0	0	0	0
HSE1	1	4	4	3	1	2	1	3	0	0	0	0	51.16	452	0.66992	1.0666	0.8176	0.82117	NaN	NaN	NaN	NaN	2462400000	1420900000	1041500000	541660000	343980000	197680000	820890000	438220000	382670000	553670000	331740000	221930000	546200000	306990000	239210000	0	0	0	0	0	0	0	0	0	0	0	0
RPL14B	1	13	1	1	7	6	5	6	9	8	8	8	15.153	138	NaN	NaN	NaN	NaN	NaN	NaN	NaN	NaN	3905600000	2143900000	1761700000	0	0	0	2001000000	1080600000	920460000	0	0	0	1773100000	994920000	778150000	28036000	15808000	12228000	20669000	11668000	9000200	0	0	0	82816000	40961000	41854000
TCD1	1	9	9	9	3	0	0	0	2	3	4	5	48.883	429	0.88675	NaN	NaN	NaN	NaN	1.2946	1.1082	1.0341	922160000	528810000	393350000	321030000	186390000	134640000	0	0	0	0	0	0	0	0	0	11661000	6851200	4809400	35862000	18224000	17637000	348150000	201500000	146640000	205460000	115840000	89622000
TDA3	1	3	3	3	3	1	0	1	0	0	0	0	57.613	523	1.0668	NaN	NaN	NaN	NaN	NaN	NaN	NaN	458580000	259670000	198910000	240620000	142370000	98249000	145390000	76183000	69204000	0	0	0	72576000	41118000	31458000	0	0	0	0	0	0	0	0	0	0	0	0
YHI9	1	4	4	4	3	2	3	1	0	0	0	0	32.563	294	1.2102	NaN	0.8314	NaN	NaN	NaN	NaN	NaN	1485900000	935390000	550480000	693610000	405660000	287950000	55367000	18549000	36818000	736900000	511180000	225710000	0	0	0	0	0	0	0	0	0	0	0	0	0	0	0
PIH1	1	7	7	7	4	4	4	4	0	0	0	0	39.519	344	1.0947	1.0481	1.4028	0.97152	NaN	NaN	NaN	NaN	6122300000	3408900000	2713400000	239730000	141270000	98460000	3417500000	1897600000	1520000000	2132600000	1181600000	950960000	332450000	188400000	144050000	0	0	0	0	0	0	0	0	0	0	0	0
BCD1	1	2	2	2	1	1	2	1	0	0	0	0	42.333	366	NaN	NaN	1.0535	NaN	NaN	NaN	NaN	NaN	437240000	252500000	184740000	105440000	60927000	44509000	96026000	63411000	32614000	141280000	72617000	68666000	94492000	55545000	38947000	0	0	0	0	0	0	0	0	0	0	0	0
DOG2	2	5	5	5	3	2	0	0	0	0	1	0	27.165	246	1.0765	NaN	NaN	NaN	NaN	NaN	NaN	NaN	783750000	398010000	385740000	370410000	207560000	162840000	376540000	180560000	195990000	0	0	0	0	0	0	0	0	0	0	0	0	36798000	9883100	26915000	0	0	0
RSC30	2	8	8	8	3	3	3	5	0	1	2	2	101.33	883	0.94227	0.9836	1.265	0.97844	NaN	NaN	0.88063	NaN	1195700000	651180000	544560000	210390000	119460000	90925000	131780000	79388000	52389000	245430000	126220000	119210000	410430000	202660000	207770000	0	0	0	53903000	27323000	26580000	88477000	56273000	32204000	55334000	39849000	15485000
FYV4	1	2	2	2	0	0	0	0	1	0	2	1	15.291	130	NaN	NaN	NaN	NaN	NaN	NaN	0.92999	NaN	90962000	56983000	33979000	0	0	0	0	0	0	0	0	0	0	0	0	3209400	2429300	780050	0	0	0	61156000	37736000	23420000	26597000	16818000	9779100
RPP1	1	3	3	3	3	2	1	1	0	0	0	0	32.224	293	1.0317	0.93585	0.96968	NaN	NaN	NaN	NaN	NaN	1846300000	1052600000	793670000	615120000	377820000	237300000	580030000	304980000	275050000	366530000	202000000	164530000	284590000	167800000	116790000	0	0	0	0	0	0	0	0	0	0	0	0
HTD2	1	2	2	2	0	0	1	0	0	1	1	1	33.055	280	NaN	NaN	NaN	NaN	NaN	1.1296	NaN	NaN	115140000	66937000	48201000	0	0	0	0	0	0	54363000	28044000	26319000	0	0	0	0	0	0	17663000	10406000	7257400	0	0	0	43111000	28486000	14625000
DYS1	1	18	18	18	15	11	12	13	1	3	7	2	42.892	387	0.98854	1.0077	0.98528	0.97495	NaN	0.55822	0.87467	NaN	73042000000	41628000000	31414000000	21624000000	12217000000	9407300000	18787000000	10534000000	8252200000	21302000000	12372000000	8930000000	11126000000	6371500000	4754800000	7381900	5119700	2262200	15385000	10801000	4583400	126040000	73672000	52366000	53809000	43717000	10093000
RRP4	1	3	3	3	2	2	3	3	0	0	0	0	39.427	359	0.97584	0.97255	0.99046	0.78638	NaN	NaN	NaN	NaN	4166500000	2346400000	1820100000	1128000000	614920000	513040000	1629600000	916920000	712700000	904140000	518540000	385600000	504750000	296020000	208730000	0	0	0	0	0	0	0	0	0	0	0	0
TRM5	1	7	7	7	2	3	2	1	1	1	1	1	56.514	499	0.87438	0.78124	0.94067	NaN	NaN	NaN	NaN	0.90184	929950000	596690000	333260000	77518000	48961000	28557000	273360000	190770000	82592000	233240000	138150000	95088000	107530000	74643000	32886000	0	0	0	5593100	3082300	2510900	76665000	44721000	31944000	156050000	96364000	59683000
QNS1	1	3	3	3	1	2	1	1	0	0	1	1	80.685	714	NaN	1.8091	NaN	NaN	NaN	NaN	NaN	NaN	2267100000	1054300000	1212800000	579840000	277040000	302800000	1089800000	453260000	636580000	405320000	212210000	193110000	187390000	108600000	78790000	0	0	0	0	0	0	1288500	755800	532670	3440700	2457300	983400
NMD2	1	4	4	4	2	2	0	1	0	0	0	0	126.75	1089	0.96056	NaN	NaN	NaN	NaN	NaN	NaN	NaN	242580000	126040000	116550000	170840000	86371000	84469000	51786000	33726000	18060000	0	0	0	19957000	5938200	14019000	0	0	0	0	0	0	0	0	0	0	0	0
LRP1	1	6	6	6	5	3	4	3	0	0	0	0	21.045	184	1.0101	0.93793	1.0062	1.1068	NaN	NaN	NaN	NaN	2841100000	1626500000	1214600000	905100000	528860000	376240000	397310000	222190000	175120000	890300000	526390000	363910000	648420000	349100000	299320000	0	0	0	0	0	0	0	0	0	0	0	0
IPI1	1	2	2	2	0	0	0	0	0	0	2	1	37.866	334	NaN	NaN	NaN	NaN	NaN	NaN	NaN	NaN	397350000	244170000	153190000	0	0	0	0	0	0	0	0	0	0	0	0	0	0	0	0	0	0	189570000	118780000	70791000	207780000	125390000	82395000
RPF1	1	7	7	7	5	6	4	2	1	0	1	0	35.121	295	0.87064	0.81333	0.74704	0.76633	NaN	NaN	NaN	NaN	17144000000	10065000000	7079200000	5499200000	3271100000	2228200000	4474800000	2620700000	1854000000	4570800000	2669100000	1901700000	2457100000	1418500000	1038600000	31229000	18947000	12281000	0	0	0	111010000	66581000	44426000	0	0	0
YHR097C	1	6	6	6	2	4	4	4	1	1	2	2	40.662	366	1.0998	1.3704	1.7569	1.4246	NaN	NaN	1.094	1.0765	3523000000	1611300000	1911700000	457230000	230590000	226640000	900200000	405900000	494300000	1007000000	431920000	575120000	956470000	431390000	525080000	16973000	9025200	7947700	5315300	2938700	2376600	81127000	45240000	35887000	98615000	54290000	44326000
TRA1	1	11	11	11	3	6	5	1	0	2	2	0	433.17	3744	0.9533	0.89121	0.95367	0.88754	NaN	1.5121	0.806	NaN	1183900000	564880000	619000000	402550000	134160000	268380000	352290000	187400000	164890000	331390000	182770000	148620000	72146000	41135000	31011000	0	0	0	4972100	2486600	2485500	20540000	16927000	3613200	0	0	0
GEP4	1	3	3	3	0	0	0	0	1	2	2	2	20.945	185	NaN	NaN	NaN	NaN	NaN	0.95928	0.93361	0.92918	131180000	79608000	51571000	0	0	0	0	0	0	0	0	0	0	0	0	10277000	7118300	3158500	15025000	9745800	5279500	36290000	21970000	14320000	69588000	40774000	28813000
SBE22	1	6	6	6	2	2	1	3	0	0	0	1	96.397	852	1.1383	NaN	NaN	1.406	NaN	NaN	NaN	NaN	360220000	220430000	139790000	235840000	138560000	97283000	22756000	22756000	0	54344000	35763000	18580000	45063000	21900000	23163000	0	0	0	0	0	0	0	0	0	2217800	1450000	767830
CTM1	1	1	1	1	1	0	0	0	0	0	0	0	68.284	585	NaN	NaN	NaN	NaN	NaN	NaN	NaN	NaN	93944000	49768000	44177000	93944000	49768000	44177000	0	0	0	0	0	0	0	0	0	0	0	0	0	0	0	0	0	0	0	0	0
UBA4	1	3	3	3	0	1	1	1	1	1	2	2	49.361	440	NaN	NaN	NaN	NaN	NaN	1.0172	0.97906	1.2306	631250000	353470000	277780000	0	0	0	103280000	61127000	42153000	136160000	61955000	74207000	107580000	56448000	51137000	21088000	15150000	5937900	62751000	38187000	24564000	144520000	85224000	59298000	55862000	35376000	20486000
DMA1	1	2	2	2	0	2	2	2	1	0	1	1	46.097	416	NaN	0.94171	0.6807	NaN	NaN	NaN	NaN	NaN	539910000	270820000	269090000	0	0	0	168070000	92015000	76053000	275240000	122590000	152650000	56745000	32042000	24702000	6203500	4057600	2145900	0	0	0	20713000	12114000	8598900	12942000	8006800	4935400
COX23	1	2	2	2	1	1	1	2	0	0	0	0	17.318	151	NaN	NaN	NaN	1.0519	NaN	NaN	NaN	NaN	277890000	141910000	135980000	72647000	35899000	36748000	56505000	24956000	31548000	72908000	38887000	34021000	75830000	42171000	33659000	0	0	0	0	0	0	0	0	0	0	0	0
SET1	1	1	1	1	0	0	1	0	0	0	0	0	123.91	1080	NaN	NaN	NaN	NaN	NaN	NaN	NaN	NaN	0	0	0	0	0	0	0	0	0	0	0	0	0	0	0	0	0	0	0	0	0	0	0	0	0	0	0
YHR122W	1	4	4	4	4	4	2	1	0	0	0	0	25.675	231	0.85567	0.95863	0.76207	NaN	NaN	NaN	NaN	NaN	4612100000	2743200000	1868800000	2630400000	1601300000	1029100000	1155800000	633790000	521980000	783090000	479750000	303340000	42796000	28422000	14374000	0	0	0	0	0	0	0	0	0	0	0	0
YHR127W	1	1	1	1	1	1	1	1	0	0	0	0	27.132	243	1.0678	1.0082	1.0404	0.99952	NaN	NaN	NaN	NaN	1542800000	810200000	732570000	394490000	212870000	181620000	414680000	209210000	205470000	407380000	215010000	192370000	326230000	173110000	153120000	0	0	0	0	0	0	0	0	0	0	0	0
WSS1	1	1	1	1	0	0	0	0	0	0	0	1	30.627	269	NaN	NaN	NaN	NaN	NaN	NaN	NaN	NaN	0	0	0	0	0	0	0	0	0	0	0	0	0	0	0	0	0	0	0	0	0	0	0	0	0	0	0
ARO9	1	2	2	2	0	2	0	1	0	0	0	0	58.527	513	NaN	NaN	NaN	NaN	NaN	NaN	NaN	NaN	156300000	107060000	49246000	0	0	0	140530000	102370000	38165000	0	0	0	15767000	4686400	11081000	0	0	0	0	0	0	0	0	0	0	0	0
YHR138C	1	2	2	2	2	1	1	0	0	0	0	0	12.752	114	1.0595	NaN	NaN	NaN	NaN	NaN	NaN	NaN	194140000	105420000	88722000	164720000	92293000	72431000	29419000	13128000	16291000	0	0	0	0	0	0	0	0	0	0	0	0	0	0	0	0	0	0
CHS7	1	1	1	1	0	0	1	1	1	1	0	0	34.898	316	NaN	NaN	NaN	NaN	NaN	NaN	NaN	NaN	78402000	54575000	23828000	0	0	0	0	0	0	51980000	39554000	12427000	0	0	0	14764000	9292800	5471400	11658000	5728300	5929700	0	0	0	0	0	0
RTT107	1	3	3	3	0	2	1	0	1	0	0	0	123.02	1070	NaN	0.77359	NaN	NaN	NaN	NaN	NaN	NaN	156120000	93667000	62453000	0	0	0	101490000	60631000	40857000	48614000	28495000	20119000	0	0	0	6017700	4540700	1477000	0	0	0	0	0	0	0	0	0
KEL1	1	17	17	17	12	8	13	9	0	0	1	2	131.09	1164	0.91714	1.0343	0.96119	1.1981	NaN	NaN	NaN	1.3398	5567100000	3121100000	2446100000	1897400000	1217300000	680190000	1086800000	596090000	490670000	1427600000	733980000	693600000	1038900000	508790000	530070000	0	0	0	0	0	0	36683000	20667000	16016000	79806000	44293000	35513000
TDA11	1	2	2	2	0	0	0	1	0	0	0	1	56.313	504	NaN	NaN	NaN	NaN	NaN	NaN	NaN	NaN	60631000	42264000	18366000	0	0	0	0	0	0	0	0	0	42672000	24305000	18366000	0	0	0	0	0	0	0	0	0	17959000	17959000	0
YAP1801	1	2	2	2	0	1	1	0	0	0	1	2	71.659	637	NaN	NaN	NaN	NaN	NaN	NaN	NaN	NaN	180970000	85093000	95881000	0	0	0	73015000	43006000	30009000	70094000	33660000	36435000	0	0	0	0	0	0	0	0	0	32395000	7012700	25382000	5470500	1414900	4055600
SOL3	1	5	5	5	2	1	2	1	0	0	2	0	27.784	249	1.3631	NaN	1.8044	NaN	NaN	NaN	0.91491	NaN	1608100000	732520000	875530000	718900000	362850000	356050000	244620000	69767000	174850000	441460000	168650000	272810000	0	0	0	0	0	0	0	0	0	203070000	131240000	71823000	0	0	0
DNA2	1	2	2	2	0	1	1	1	0	0	0	0	171.69	1522	NaN	NaN	NaN	NaN	NaN	NaN	NaN	NaN	232150000	106040000	126100000	0	0	0	30041000	19126000	10915000	169990000	70008000	99981000	32116000	16910000	15206000	0	0	0	0	0	0	0	0	0	0	0	0
MTG2	1	1	1	1	0	0	0	0	0	0	1	1	57.846	518	NaN	NaN	NaN	NaN	NaN	NaN	NaN	NaN	38192000	19407000	18785000	0	0	0	0	0	0	0	0	0	0	0	0	0	0	0	0	0	0	11549000	6918400	4630900	26643000	12488000	14154000
NMD3	1	6	6	6	6	6	6	3	0	0	0	0	59.095	518	0.8879	0.80531	0.86006	0.91106	NaN	NaN	NaN	NaN	4305900000	2476900000	1828900000	1681000000	947410000	733590000	895210000	524450000	370760000	1088300000	634960000	453360000	641350000	370130000	271220000	0	0	0	0	0	0	0	0	0	0	0	0
NVJ1	1	7	7	7	3	3	2	1	1	0	5	3	36.421	321	1.0401	1.0641	1.1498	NaN	NaN	NaN	1.2483	1.0957	1717700000	932940000	784780000	681870000	343930000	337950000	358620000	193400000	165220000	232780000	126230000	106540000	0	0	0	24909000	15304000	9605300	0	0	0	306610000	187410000	119200000	112930000	66673000	46260000
RIX1	1	8	8	8	6	5	4	6	0	0	1	1	86.738	763	0.97033	0.90003	0.86313	0.87951	NaN	NaN	NaN	1.1652	9148200000	5243400000	3904800000	2814700000	1584400000	1230300000	2514400000	1420300000	1094100000	1805500000	1084500000	721010000	1963700000	1129300000	834350000	0	0	0	0	0	0	15774000	6556600	9217100	34123000	18242000	15881000
RPN10	1	2	2	2	0	0	0	0	0	0	2	1	29.747	268	NaN	NaN	NaN	NaN	NaN	NaN	1.4963	NaN	127050000	80374000	46671000	0	0	0	0	0	0	0	0	0	0	0	0	0	0	0	0	0	0	61590000	26963000	34627000	65455000	53412000	12044000
MNL1	1	4	4	4	0	0	0	0	1	1	2	2	91.245	796	NaN	NaN	NaN	NaN	NaN	0.948	1.0821	1.5277	103020000	61133000	41882000	0	0	0	0	0	0	0	0	0	0	0	0	0	0	0	42263000	24265000	17998000	36982000	23303000	13680000	23770000	13566000	10204000
SKN7	1	1	1	1	0	1	1	0	0	0	0	0	69.201	622	NaN	NaN	NaN	NaN	NaN	NaN	NaN	NaN	106660000	53440000	53218000	0	0	0	48372000	21298000	27074000	58286000	32142000	26144000	0	0	0	0	0	0	0	0	0	0	0	0	0	0	0
SET5	1	5	5	5	4	3	3	3	0	0	0	0	60.547	526	0.98238	1.024	0.92566	0.98392	NaN	NaN	NaN	NaN	4764800000	2664100000	2100700000	2044300000	1099300000	945060000	791600000	456880000	334720000	1299700000	739550000	560140000	629140000	368410000	260730000	0	0	0	0	0	0	0	0	0	0	0	0
RPB11	1	3	3	3	1	1	1	2	0	0	1	1	13.615	120	NaN	NaN	NaN	0.95504	NaN	NaN	NaN	NaN	1442600000	813540000	629020000	114720000	80763000	33955000	277630000	150910000	126730000	317190000	177530000	139660000	653960000	370240000	283730000	0	0	0	0	0	0	34577000	14337000	20239000	44477000	19767000	24710000
RTS1	1	8	8	8	3	3	4	2	1	1	1	1	85.334	757	1.05	0.74419	0.77691	0.85102	NaN	NaN	NaN	NaN	3232800000	1877800000	1355000000	587290000	358260000	229030000	913910000	563360000	350560000	696810000	390930000	305880000	904530000	480250000	424280000	2839100	1757000	1082100	24713000	17009000	7703500	15581000	10416000	5165200	87160000	55849000	31311000
SPP41	1	4	4	4	2	1	0	0	1	0	0	0	161.6	1435	0.54376	NaN	NaN	NaN	NaN	NaN	NaN	NaN	186400000	114310000	72094000	101880000	79001000	22875000	45021000	32576000	12445000	0	0	0	0	0	0	39506000	2732300	36774000	0	0	0	0	0	0	0	0	0
CHL4	1	1	1	1	0	0	0	0	1	1	1	1	52.671	458	NaN	NaN	NaN	NaN	NaN	NaN	NaN	NaN	145930000	87875000	58060000	0	0	0	0	0	0	0	0	0	0	0	0	14984000	8724000	6260100	15415000	8836100	6579200	68371000	41432000	26939000	47164000	28883000	18282000
CYC2	1	3	3	3	0	0	0	0	0	2	1	1	42.367	366	NaN	NaN	NaN	NaN	NaN	0.89299	NaN	NaN	68306000	40177000	28128000	0	0	0	0	0	0	0	0	0	0	0	0	0	0	0	16827000	11318000	5509200	39675000	22676000	16998000	11804000	6183400	5620800
PET8	1	2	2	2	0	0	0	0	0	1	2	1	31.026	284	NaN	NaN	NaN	NaN	NaN	NaN	0.73242	NaN	142830000	90716000	52114000	0	0	0	0	0	0	0	0	0	0	0	0	0	0	0	6545000	4333700	2211300	90833000	56897000	33936000	45452000	29485000	15967000
HRB1	1	5	5	5	3	3	3	1	1	1	1	2	52.141	454	1.0041	1.0346	1.0441	NaN	NaN	NaN	NaN	1.0501	1591600000	871120000	720490000	364360000	194860000	169500000	463390000	264960000	198430000	504460000	268360000	236110000	193110000	103660000	89449000	3607000	2427400	1179600	1758200	1138800	619400	24345000	14887000	9458900	36579000	20833000	15747000
SMF1	1	2	2	2	0	0	0	0	0	1	1	0	63.263	575	NaN	NaN	NaN	NaN	NaN	NaN	NaN	NaN	18575000	12772000	5802500	0	0	0	0	0	0	0	0	0	0	0	0	0	0	0	7519700	3691800	3827800	11055000	9080500	1974700	0	0	0
AXL2	1	4	4	4	1	2	0	1	1	1	0	1	90.782	823	NaN	NaN	NaN	NaN	NaN	NaN	NaN	NaN	36244000	24916000	11328000	0	0	0	0	0	0	0	0	0	0	0	0	27876000	21854000	6021700	5395200	2241500	3153700	0	0	0	2973500	820400	2153100
CKB2	1	4	4	4	1	1	0	0	0	2	2	2	29.842	258	NaN	NaN	NaN	NaN	NaN	0.91925	1.0322	1.3013	1184400000	628200000	556160000	560770000	296800000	263970000	447570000	232030000	215540000	0	0	0	0	0	0	0	0	0	18303000	11040000	7263300	58459000	37680000	20779000	99256000	50645000	48611000
SSN2	1	2	2	2	0	1	1	1	0	0	0	0	160	1420	NaN	NaN	NaN	NaN	NaN	NaN	NaN	NaN	46144000	26132000	20012000	0	0	0	0	0	0	0	0	0	46144000	26132000	20012000	0	0	0	0	0	0	0	0	0	0	0	0
VPS45	1	7	7	7	4	2	2	2	0	1	4	3	67.017	577	1.033	1.0948	1.0078	1.3218	NaN	NaN	1.1888	1.1022	723950000	377760000	346180000	137410000	78487000	58919000	194190000	96980000	97214000	114100000	59150000	54953000	155770000	76610000	79159000	0	0	0	6729400	2822600	3906800	88133000	47700000	40432000	27610000	16013000	11597000
PET100	1	3	3	3	0	0	1	1	0	1	2	1	13.187	111	NaN	NaN	NaN	NaN	NaN	NaN	0.9599	NaN	39113000	23553000	15560000	0	0	0	0	0	0	4775800	2662700	2113100	3441300	1683000	1758400	0	0	0	1898500	1137400	761130	21419000	13266000	8153700	7577900	4804500	2773400
PNT1	1	2	2	2	0	0	0	0	1	1	0	0	48.933	423	NaN	NaN	NaN	NaN	NaN	NaN	NaN	NaN	20704000	14228000	6475700	0	0	0	0	0	0	0	0	0	0	0	0	4510700	4510700	0	16193000	9717600	6475700	0	0	0	0	0	0
SRP14	1	2	2	2	1	0	0	0	2	1	2	2	16.43	146	NaN	NaN	NaN	NaN	NaN	NaN	1.287	1.3809	384740000	233170000	151570000	237140000	151640000	85503000	0	0	0	0	0	0	0	0	0	14219000	11554000	2665200	12919000	7721100	5198200	51697000	26660000	25037000	68766000	35594000	33172000
ASP1	1	12	12	12	10	7	8	9	0	0	1	1	41.395	381	0.95446	0.87634	0.84678	0.92128	NaN	NaN	NaN	NaN	14928000000	8494800000	6433300000	5227400000	2999400000	2228000000	3241500000	1863400000	1378100000	3403200000	1893900000	1509300000	3016000000	1712500000	1303500000	0	0	0	0	0	0	22138000	11914000	10224000	17846000	13730000	4115800
TEM1	1	1	1	1	1	0	0	0	0	0	0	0	27.296	245	NaN	NaN	NaN	NaN	NaN	NaN	NaN	NaN	46876000	26554000	20322000	46876000	26554000	20322000	0	0	0	0	0	0	0	0	0	0	0	0	0	0	0	0	0	0	0	0	0
SMC2	1	6	6	6	2	3	0	2	0	1	0	0	133.93	1170	1.0449	0.94676	NaN	1.2039	NaN	NaN	NaN	NaN	1157800000	612110000	545720000	718870000	392280000	326590000	275750000	142500000	133250000	0	0	0	133040000	61266000	71776000	0	0	0	30166000	16064000	14102000	0	0	0	0	0	0
MSS4	1	2	2	2	1	0	0	0	0	0	1	0	89.319	779	NaN	NaN	NaN	NaN	NaN	NaN	NaN	NaN	156460000	45933000	110520000	141880000	37367000	104510000	0	0	0	0	0	0	0	0	0	0	0	0	0	0	0	14581000	8565500	6016000	0	0	0
NAB3	1	5	5	5	3	2	2	3	1	1	1	1	90.438	802	1.0553	0.94716	1.02	0.98043	NaN	NaN	NaN	NaN	3513500000	1859400000	1654100000	1116300000	505050000	611270000	788130000	468430000	319700000	803460000	456980000	346480000	596960000	311320000	285640000	17628000	9583800	8043900	18878000	10766000	8111700	89741000	50468000	39273000	82355000	46793000	35562000
LYS9	1	6	6	6	6	4	3	3	0	0	2	0	48.917	446	1.0801	1.0408	1.173	1.1498	NaN	NaN	0.79331	NaN	9532400000	5126800000	4405600000	4309400000	2311400000	1998100000	1764800000	936510000	828280000	2195800000	1193000000	1002900000	1227800000	662470000	565340000	0	0	0	0	0	0	34533000	23505000	11028000	0	0	0
UME6	1	4	4	4	1	2	1	1	0	0	0	0	91.123	836	NaN	0.74098	NaN	NaN	NaN	NaN	NaN	NaN	502890000	176730000	326150000	62199000	29182000	33017000	72030000	41753000	30277000	65612000	33165000	32446000	303040000	72633000	230410000	0	0	0	0	0	0	0	0	0	0	0	0
HXT7;HXT6	2	2	2	2	0	0	0	0	1	2	2	2	62.734	570	NaN	NaN	NaN	NaN	NaN	0.45284	0.79598	0.65825	286910000	207280000	79630000	0	0	0	0	0	0	0	0	0	0	0	0	20340000	15230000	5110200	32146000	29594000	2551900	175460000	122950000	52515000	58961000	39508000	19453000
POP2	1	2	2	2	1	0	0	1	0	0	1	1	49.682	433	NaN	NaN	NaN	NaN	NaN	NaN	NaN	NaN	370500000	197380000	173120000	272020000	148000000	124020000	0	0	0	0	0	0	0	0	0	0	0	0	0	0	0	31578000	16134000	15444000	66905000	33248000	33657000
DUN1	1	6	6	6	2	5	3	3	0	0	1	0	58.632	513	0.95786	1.116	1.0718	0.94042	NaN	NaN	NaN	NaN	735910000	411750000	324170000	127070000	77354000	49719000	268080000	138620000	129450000	110040000	59228000	50816000	180560000	98882000	81682000	0	0	0	0	0	0	50154000	37660000	12494000	0	0	0
AKR1	1	4	4	4	1	2	0	0	1	0	2	2	85.839	764	0.78004	NaN	NaN	NaN	NaN	NaN	0.77417	0.97749	358110000	208620000	149490000	185190000	102950000	82240000	0	0	0	0	0	0	0	0	0	24466000	16607000	7859300	0	0	0	87557000	51090000	36467000	60902000	37979000	22923000
BEM4	1	2	2	2	2	1	1	1	0	0	0	0	70.992	633	0.89527	NaN	NaN	NaN	NaN	NaN	NaN	NaN	415120000	247870000	167250000	153900000	106620000	47286000	77921000	31519000	46402000	75540000	47815000	27724000	107760000	61921000	45834000	0	0	0	0	0	0	0	0	0	0	0	0
END3	1	8	8	8	4	2	2	3	1	2	3	2	40.297	349	1.0817	1.1241	1.0113	1.1713	NaN	NaN	0.93252	1.8528	1809200000	940560000	868630000	628940000	342340000	286600000	441190000	232370000	208820000	392650000	193180000	199470000	107990000	55758000	52228000	5343900	2048900	3295000	10057000	10057000	0	169390000	82712000	86675000	53630000	22083000	31547000
MPT5	1	2	2	2	1	1	1	0	0	0	1	0	95.421	859	NaN	NaN	NaN	NaN	NaN	NaN	NaN	NaN	58534000000	31663000000	26870000000	19163000000	10447000000	8715600000	18389000000	9807800000	8580900000	20964000000	11406000000	9558700000	0	0	0	0	0	0	0	0	0	17797000	2582500	15215000	0	0	0
PCF11	1	4	4	4	0	0	1	2	0	0	1	1	71.897	626	NaN	NaN	NaN	NaN	NaN	NaN	NaN	NaN	264840000	149210000	115630000	0	0	0	0	0	0	46149000	22976000	23173000	210520000	122630000	87896000	0	0	0	0	0	0	5797100	2540200	3256900	2366000	1064000	1302000
RGA1	1	4	4	4	1	1	3	2	0	0	0	0	112.83	1007	NaN	NaN	1.0318	NaN	NaN	NaN	NaN	NaN	591570000	256920000	334660000	148200000	68878000	79324000	32593000	21887000	10706000	363490000	137350000	226140000	47286000	28798000	18488000	0	0	0	0	0	0	0	0	0	0	0	0
COX14	1	2	2	2	1	1	1	0	1	1	1	1	7.9589	70	NaN	NaN	NaN	NaN	NaN	NaN	NaN	NaN	8917000	8917000	0	0	0	0	0	0	0	0	0	0	0	0	0	8917000	8917000	0	0	0	0	0	0	0	0	0	0
PIK1	1	4	4	4	2	1	1	1	0	0	2	0	119.92	1066	0.90058	NaN	NaN	0.98822	NaN	NaN	NaN	NaN	723270000	405410000	317870000	349510000	202250000	147260000	87298000	54585000	32713000	68641000	43274000	25367000	206490000	98507000	107980000	0	0	0	0	0	0	11332000	6792400	4539700	0	0	0
DSS1	1	4	4	4	0	0	1	0	1	2	1	2	110.82	969	NaN	NaN	NaN	NaN	NaN	1.453	NaN	0.79685	265360000	113420000	151940000	0	0	0	0	0	0	125010000	29927000	95078000	0	0	0	9392400	7825100	1567300	17286000	8640200	8646100	47892000	30212000	17680000	65781000	36815000	28966000
IFH1	1	2	2	2	1	1	0	0	0	0	0	0	122.49	1085	NaN	NaN	NaN	NaN	NaN	NaN	NaN	NaN	25026000	13614000	11412000	2708900	1943100	765780	22317000	11671000	10646000	0	0	0	0	0	0	0	0	0	0	0	0	0	0	0	0	0	0
FHL1	1	4	4	4	2	2	0	1	0	0	0	0	103.5	936	NaN	0.79618	NaN	NaN	NaN	NaN	NaN	NaN	209420000	131710000	77713000	39775000	32436000	7338900	98049000	56196000	41853000	0	0	0	71598000	43076000	28521000	0	0	0	0	0	0	0	0	0	0	0	0
	1	6	6	6	3	2	1	1	1	0	0	1	105.91	943	1.1321	NaN	NaN	NaN	NaN	NaN	NaN	NaN	472680000	300780000	171890000	317100000	200570000	116530000	75047000	61192000	13855000	59394000	25587000	33808000	0	0	0	6472000	4064200	2407800	0	0	0	0	0	0	14667000	9369700	5297800
DRS2	1	5	5	5	2	1	1	0	0	2	1	2	153.76	1355	1.1367	NaN	NaN	NaN	NaN	1.069	NaN	1.0802	726780000	366890000	359890000	495120000	236670000	258450000	78355000	43010000	35346000	62509000	35245000	27264000	0	0	0	0	0	0	17823000	9580300	8242800	8275400	4525900	3749600	64693000	37856000	26837000
CEM1	1	8	8	8	2	4	2	2	0	2	1	1	47.555	442	0.7664	1.9595	0.68871	0.79731	NaN	1.0111	NaN	NaN	687900000	323710000	364190000	176140000	109480000	66660000	292110000	90549000	201560000	83487000	46001000	37486000	82934000	52587000	30347000	0	0	0	4521800	2580500	1941300	15725000	5480100	10245000	32974000	17028000	15946000
LAA1	1	1	1	1	0	1	0	0	0	0	0	0	229.9	2014	NaN	NaN	NaN	NaN	NaN	NaN	NaN	NaN	13281000	13281000	0	0	0	0	13281000	13281000	0	0	0	0	0	0	0	0	0	0	0	0	0	0	0	0	0	0	0
UBP12	1	7	7	7	5	4	3	2	0	0	0	1	143.19	1254	0.92564	0.96122	0.96434	1.0989	NaN	NaN	NaN	NaN	2117200000	1226900000	890250000	543540000	312300000	231250000	647420000	375380000	272040000	480970000	280850000	200110000	438040000	251180000	186860000	0	0	0	0	0	0	0	0	0	7190100	7190100	0
MEF2	1	6	6	6	0	0	0	0	2	1	1	6	91.282	819	NaN	NaN	NaN	NaN	NaN	NaN	NaN	1.0934	105320000	61007000	44311000	0	0	0	0	0	0	0	0	0	0	0	0	13686000	13686000	0	0	0	0	0	0	0	91632000	47321000	44311000
PRP39	1	3	3	3	1	0	1	0	1	1	1	0	74.747	629	NaN	NaN	NaN	NaN	NaN	NaN	NaN	NaN	546650000	281210000	265440000	145830000	89211000	56617000	0	0	0	257410000	100370000	157040000	0	0	0	34591000	24832000	9758300	41632000	26485000	15147000	67192000	40316000	26877000	0	0	0
NPT1	1	13	13	13	11	7	6	2	1	3	2	2	49.018	429	0.98009	1.1649	1.1572	1.4204	NaN	0.69119	1.2846	1.0014	10434000000	5558400000	4875800000	6154000000	3348500000	2805500000	1627700000	870490000	757200000	1357800000	677440000	680390000	1155900000	577590000	578340000	5091800	3198100	1893700	32765000	23044000	9720300	62714000	34098000	28616000	38226000	24058000	14168000
MET10	1	2	2	2	1	0	1	0	0	0	0	0	114.83	1035	NaN	NaN	NaN	NaN	NaN	NaN	NaN	NaN	111350000	63369000	47983000	75185000	43933000	31252000	0	0	0	36167000	19435000	16731000	0	0	0	0	0	0	0	0	0	0	0	0	0	0	0
VPS8	1	1	1	1	0	0	0	0	1	0	1	1	144.96	1274	NaN	NaN	NaN	NaN	NaN	NaN	NaN	NaN	17152000	8226900	8924800	0	0	0	0	0	0	0	0	0	0	0	0	1664800	1043700	621030	0	0	0	15487000	7183200	8303800	0	0	0
SWD1	1	1	1	1	1	0	0	0	0	0	0	0	48.654	426	NaN	NaN	NaN	NaN	NaN	NaN	NaN	NaN	49184000	28967000	20217000	49184000	28967000	20217000	0	0	0	0	0	0	0	0	0	0	0	0	0	0	0	0	0	0	0	0	0
BDH1	1	6	6	6	5	3	3	1	2	2	5	3	41.582	382	1.0933	1.0161	1.1651	1.1253	NaN	0.51888	1.0085	1.0585	3678100000	1911400000	1766600000	1915600000	975490000	940130000	702770000	382000000	320770000	334270000	158020000	176250000	369030000	188250000	180780000	8310900	5063400	3247500	16315000	11720000	4594700	150400000	85334000	65065000	181340000	105540000	75800000
ECM1	1	6	6	6	6	5	4	4	1	1	2	1	23.891	212	0.85681	0.76146	0.78796	0.77787	NaN	NaN	NaN	NaN	8006700000	4672100000	3334600000	2642800000	1562900000	1079900000	2368400000	1358100000	1010300000	1323900000	786990000	536940000	1582100000	904470000	677670000	15511000	11524000	3986900	2152200	1767200	385050	40573000	26810000	13762000	31194000	19524000	11669000
AIM2	1	1	1	1	1	1	1	1	0	0	0	0	27.089	246	1.047	1.0709	1.0734	1.0692	NaN	NaN	NaN	NaN	3321400000	1753800000	1567600000	830230000	440840000	389380000	783310000	386540000	396760000	786770000	416060000	370710000	921140000	510380000	410760000	0	0	0	0	0	0	0	0	0	0	0	0
SPC72	1	1	1	1	1	0	0	0	0	0	0	0	72.105	622	NaN	NaN	NaN	NaN	NaN	NaN	NaN	NaN	26042000	13917000	12125000	26042000	13917000	12125000	0	0	0	0	0	0	0	0	0	0	0	0	0	0	0	0	0	0	0	0	0
AIM1	1	1	1	1	1	1	1	1	1	1	1	1	13.356	118	NaN	NaN	1.0529	0.95567	NaN	NaN	NaN	NaN	1410600000	781680000	628890000	258510000	149040000	109460000	251080000	135130000	115950000	408510000	226930000	181570000	404750000	217050000	187700000	11329000	7771000	3558000	11081000	6241200	4839400	30947000	18595000	12352000	34365000	20913000	13452000
GCV3	1	3	3	3	2	2	2	2	1	2	2	3	18.793	170	0.98033	1.4093	1.1491	1.2601	NaN	0.97716	1.0267	0.93403	7134900000	3703900000	3431000000	3692600000	1849700000	1842900000	872210000	466630000	405570000	1058500000	556110000	502350000	1040700000	534710000	505940000	29756000	20622000	9134400	92878000	60709000	32169000	116680000	75380000	41297000	231690000	140060000	91629000
GIP4	1	5	5	5	0	0	0	0	1	1	2	4	86.635	760	NaN	NaN	NaN	NaN	NaN	NaN	1.1054	1.0035	95447000	52104000	43343000	0	0	0	0	0	0	0	0	0	0	0	0	6622100	4144900	2477200	1746200	1458200	287980	29580000	14981000	14598000	57499000	31520000	25979000
VPS52	1	5	5	5	2	2	0	0	0	1	1	0	74.332	641	1.9516	1.032	NaN	NaN	NaN	NaN	NaN	NaN	952320000	505070000	447250000	291480000	139680000	151800000	570630000	303110000	267520000	0	0	0	0	0	0	0	0	0	56955000	37631000	19324000	33248000	24645000	8603000	0	0	0
SSP120	1	2	2	2	2	2	2	0	1	1	1	0	27.289	234	1.0523	0.87966	NaN	NaN	NaN	NaN	NaN	NaN	856490000	468990000	387500000	359050000	202260000	156790000	333000000	193970000	139030000	150940000	65776000	85161000	0	0	0	3473200	1837800	1635500	4405900	2394900	2011000	5627600	2749700	2877900	0	0	0
PAC2	1	1	1	1	0	1	1	0	0	0	0	0	59.257	518	NaN	NaN	NaN	NaN	NaN	NaN	NaN	NaN	35507000	35507000	0	0	0	0	17753000	17753000	0	17754000	17754000	0	0	0	0	0	0	0	0	0	0	0	0	0	0	0	0
AST2	1	5	5	5	1	0	0	0	0	2	1	3	48.37	430	NaN	NaN	NaN	NaN	NaN	NaN	NaN	0.91446	363520000	215680000	147840000	32945000	21714000	11231000	0	0	0	0	0	0	0	0	0	0	0	0	12844000	9111100	3733100	72922000	48211000	24711000	244810000	136640000	108160000
OXA1	1	1	1	1	1	1	1	0	0	0	1	1	44.815	402	1.1	0.94444	0.9131	NaN	NaN	NaN	NaN	NaN	2071900000	1181700000	890190000	1059300000	584240000	475090000	571510000	322020000	249490000	413600000	259860000	153740000	0	0	0	0	0	0	0	0	0	16428000	9289500	7138600	10972000	6252200	4720200
SAP1	1	1	1	1	0	1	0	0	0	0	0	0	100.33	897	NaN	NaN	NaN	NaN	NaN	NaN	NaN	NaN	66897000	42934000	23963000	0	0	0	66897000	42934000	23963000	0	0	0	0	0	0	0	0	0	0	0	0	0	0	0	0	0	0
PTC2	1	8	8	8	8	8	8	6	0	0	0	0	50.388	464	1.0132	1.0118	0.86068	1.0004	NaN	NaN	NaN	NaN	11895000000	6800900000	5093900000	4261100000	2393300000	1867700000	2909700000	1616200000	1293500000	2616900000	1550600000	1066300000	2107000000	1240700000	866320000	0	0	0	0	0	0	0	0	0	0	0	0
BOI2	1	5	5	5	2	2	2	4	0	0	0	1	115.69	1040	1.031	0.9698	0.86935	0.93859	NaN	NaN	NaN	NaN	3200600000	1906500000	1294100000	519660000	299360000	220310000	493690000	252720000	240970000	1091400000	643770000	447630000	1094200000	709760000	384430000	0	0	0	0	0	0	0	0	0	1622100	877840	744280
HPA3	1	3	3	3	2	2	1	0	0	0	0	0	18.814	161	1.0824	1.1046	NaN	NaN	NaN	NaN	NaN	NaN	1981500000	1053000000	928550000	926130000	498310000	427820000	557830000	288490000	269350000	497540000	266150000	231390000	0	0	0	0	0	0	0	0	0	0	0	0	0	0	0
HAT2	1	4	4	4	4	4	4	4	0	0	0	0	45.06	401	1.064	1.4933	1.081	1.0438	NaN	NaN	NaN	NaN	2528500000	1333700000	1194800000	576070000	323820000	252240000	592000000	289470000	302520000	709930000	379940000	329990000	650460000	340430000	310030000	0	0	0	0	0	0	0	0	0	0	0	0
GEA2	1	9	9	9	5	6	6	5	1	0	1	1	165.67	1459	1.0107	0.88257	0.96552	1.0365	NaN	NaN	NaN	NaN	4796400000	1863600000	2932800000	1344600000	366220000	978390000	680890000	378940000	301950000	594050000	321750000	272300000	2084600000	784730000	1299900000	84945000	7695000	77250000	0	0	0	3425300	1953900	1471500	3846200	2262500	1583700
YEL020C	1	3	3	3	0	0	0	0	0	1	2	2	61.288	560	NaN	NaN	NaN	NaN	NaN	NaN	0.82862	1.2159	49329000	26122000	23207000	0	0	0	0	0	0	0	0	0	0	0	0	0	0	0	8746900	4913200	3833700	13681000	7555100	6126200	26901000	13654000	13247000
GTT3	1	3	3	3	0	0	0	0	1	0	2	3	38.234	337	NaN	NaN	NaN	NaN	NaN	NaN	1.0272	1.3375	38452000	22682000	15770000	0	0	0	0	0	0	0	0	0	0	0	0	6198900	4331300	1867600	0	0	0	18845000	11193000	7651200	13409000	7157700	6251000
EDC3	1	5	5	5	4	4	4	3	1	0	1	1	61.339	551	0.92763	0.83917	0.90571	0.92846	NaN	NaN	NaN	NaN	2500300000	1467100000	1033200000	826410000	469500000	356910000	532170000	307550000	224610000	717570000	438600000	278970000	401500000	238790000	162710000	1851000	1334200	516850	0	0	0	6007200	3704100	2303100	14822000	7596500	7225500
MIT1	1	3	3	3	2	1	1	2	0	0	0	0	72.533	666	1.0043	NaN	NaN	0.94648	NaN	NaN	NaN	NaN	1799400000	1000000000	799350000	580570000	311090000	269480000	354950000	205790000	149160000	437130000	245060000	192070000	426720000	238080000	188640000	0	0	0	0	0	0	0	0	0	0	0	0
VAB2	1	1	1	1	0	0	0	0	1	1	1	1	31.364	282	NaN	NaN	NaN	NaN	NaN	NaN	NaN	1.1771	168210000	81926000	86284000	0	0	0	0	0	0	0	0	0	0	0	0	12888000	7691300	5197000	29345000	14501000	14844000	86633000	38524000	48109000	39345000	21210000	18134000
GIM4	1	1	1	1	0	1	1	1	0	0	0	0	12.994	111	NaN	NaN	NaN	NaN	NaN	NaN	NaN	NaN	445290000	236300000	208990000	0	0	0	149020000	74330000	74689000	210120000	119180000	90939000	86153000	42787000	43367000	0	0	0	0	0	0	0	0	0	0	0	0
YND1	1	2	2	2	1	1	1	1	0	0	0	1	71.851	630	NaN	NaN	NaN	NaN	NaN	NaN	NaN	NaN	138310000	67526000	70782000	18458000	9193700	9264500	58426000	26502000	31924000	0	0	0	56635000	29262000	27373000	0	0	0	0	0	0	0	0	0	4788300	2567900	2220400
YER010C	1	3	3	3	2	0	2	0	0	0	0	1	25.563	234	0.79437	NaN	1.8041	NaN	NaN	NaN	NaN	NaN	524670000	310350000	214320000	289820000	200370000	89452000	0	0	0	180190000	60818000	119370000	0	0	0	0	0	0	0	0	0	0	0	0	54664000	49167000	5496600
BIM1	1	1	1	1	1	1	1	1	0	0	0	0	38.361	344	NaN	0.95735	1.0324	1.0435	NaN	NaN	NaN	NaN	1504000000	820730000	683260000	399110000	216180000	182930000	490570000	286560000	204010000	453580000	234810000	218780000	160740000	83191000	77545000	0	0	0	0	0	0	0	0	0	0	0	0
SPC25	1	1	1	1	1	0	0	0	0	0	0	0	25.244	221	NaN	NaN	NaN	NaN	NaN	NaN	NaN	NaN	24256000	13554000	10702000	24256000	13554000	10702000	0	0	0	0	0	0	0	0	0	0	0	0	0	0	0	0	0	0	0	0	0
RPN3	1	10	10	10	8	7	3	2	0	0	4	1	60.392	523	0.90193	0.94782	0.84623	1.1402	NaN	NaN	0.99645	NaN	8548800000	4963700000	3585100000	4738800000	2779000000	1959800000	2616700000	1514900000	1101800000	660360000	390660000	269700000	442370000	223460000	218910000	0	0	0	0	0	0	81170000	50311000	30859000	9373400	5333400	4040000
FIR1	1	1	1	1	1	0	0	0	0	0	0	0	98.811	876	NaN	NaN	NaN	NaN	NaN	NaN	NaN	NaN	43212000	28556000	14656000	43212000	28556000	14656000	0	0	0	0	0	0	0	0	0	0	0	0	0	0	0	0	0	0	0	0	0
YER034W	1	3	3	3	2	2	1	1	0	0	0	0	21.19	185	0.97586	0.89608	NaN	NaN	NaN	NaN	NaN	NaN	688990000	353620000	335370000	316780000	161470000	155320000	169140000	86582000	82554000	107420000	58217000	49205000	95645000	47353000	48292000	0	0	0	0	0	0	0	0	0	0	0	0
MXR1	1	5	5	5	4	3	3	1	0	0	0	0	21.141	184	0.96695	1.0204	1.1119	NaN	NaN	NaN	NaN	NaN	2140400000	1201400000	938990000	758990000	446260000	312730000	555170000	305100000	250070000	559320000	299160000	260160000	266920000	150890000	116020000	0	0	0	0	0	0	0	0	0	0	0	0
SPO73	1	1	1	1	0	0	0	0	0	0	1	1	16.598	143	NaN	NaN	NaN	NaN	NaN	NaN	NaN	NaN	25203000	15765000	9438300	0	0	0	0	0	0	0	0	0	0	0	0	0	0	0	0	0	0	10773000	7705200	3067500	14431000	8059800	6370800
RSM18	1	4	4	4	2	1	2	0	0	1	2	3	15.835	138	1.0241	NaN	1.0117	NaN	NaN	NaN	0.67525	1.0529	753340000	434370000	318970000	244780000	143270000	101510000	57899000	32977000	24922000	210060000	117070000	92991000	0	0	0	0	0	0	21950000	14286000	7664500	165690000	97182000	68506000	52955000	29581000	23374000
HMF1	1	1	1	1	1	1	1	1	0	0	0	0	13.906	129	1.0721	NaN	NaN	NaN	NaN	NaN	NaN	NaN	3730700000	2029200000	1701500000	2437300000	1330900000	1106400000	1070900000	584480000	486380000	0	0	0	222570000	113790000	108780000	0	0	0	0	0	0	0	0	0	0	0	0
PCL6	1	2	2	2	0	1	0	0	0	0	0	1	47.006	420	NaN	NaN	NaN	NaN	NaN	NaN	NaN	NaN	138010000	74278000	63729000	0	0	0	135660000	72852000	62810000	0	0	0	0	0	0	0	0	0	0	0	0	0	0	0	2344000	1425300	918720
THO1	1	5	5	5	3	4	3	2	1	0	1	1	24.137	218	1.2122	1.0672	1.0254	1.0189	NaN	NaN	NaN	NaN	3012400000	1526500000	1485800000	1939000000	966300000	972730000	419650000	217370000	202280000	444730000	223200000	221540000	205130000	117130000	87999000	3837000	2550700	1286300	0	0	0	0	0	0	0	0	0
RGI1	1	1	1	1	1	1	1	1	0	0	0	0	18.989	161	NaN	NaN	NaN	NaN	NaN	NaN	NaN	NaN	705160000	375110000	330060000	164160000	84666000	79493000	157950000	62954000	94996000	180730000	98159000	82573000	202320000	129330000	72994000	0	0	0	0	0	0	0	0	0	0	0	0
TDA2	1	3	3	3	2	2	2	1	0	0	0	0	14.498	126	1.3943	1.4569	1.9844	NaN	NaN	NaN	NaN	NaN	1108700000	481840000	626870000	213200000	98674000	114530000	314920000	151070000	163840000	364470000	132490000	231980000	216120000	99603000	116520000	0	0	0	0	0	0	0	0	0	0	0	0
YER077C	1	3	3	3	0	0	0	0	1	3	2	2	79.547	688	NaN	NaN	NaN	NaN	NaN	1.5105	0.94585	0.75204	482460000	290570000	191890000	0	0	0	0	0	0	0	0	0	0	0	0	15349000	11237000	4112100	59298000	34629000	24668000	225190000	134320000	90866000	182620000	110380000	72243000
ICP55	1	6	6	6	1	0	0	0	0	0	3	4	57.989	511	NaN	NaN	NaN	NaN	NaN	NaN	0.73156	1.5579	440790000	257600000	183180000	66545000	39785000	26760000	0	0	0	0	0	0	0	0	0	0	0	0	0	0	0	175350000	108980000	66378000	198890000	108840000	90046000
YER079W	1	2	2	2	0	1	0	0	0	0	0	1	23.197	210	NaN	NaN	NaN	NaN	NaN	NaN	NaN	NaN	9528800	5711900	3816900	0	0	0	0	0	0	0	0	0	0	0	0	0	0	0	0	0	0	0	0	0	9528800	5711900	3816900
SER3	1	9	9	6	8	7	7	6	0	0	1	0	51.193	469	1.0504	1.0875	1.2394	1.1082	NaN	NaN	NaN	NaN	24327000000	12569000000	11758000000	7356200000	3729700000	3626500000	6382700000	3267200000	3115600000	6252700000	3088000000	3164700000	4326100000	2478200000	1847900000	0	0	0	0	0	0	8870100	5908200	2961900	0	0	0
DOT6	1	4	4	4	3	2	0	0	0	0	1	1	73.048	670	0.97797	0.9475	NaN	NaN	NaN	NaN	NaN	NaN	793540000	438760000	354780000	563650000	321220000	242430000	174510000	78338000	96172000	0	0	0	0	0	0	0	0	0	0	0	0	23996000	15907000	8088800	31387000	23291000	8096200
IES5	1	4	4	4	2	2	3	3	1	1	1	1	14.312	125	NaN	NaN	0.9641	1.1874	NaN	NaN	NaN	NaN	5939100000	3258900000	2680100000	986380000	545120000	441260000	1147200000	631890000	515340000	1232100000	651210000	580900000	1239200000	645410000	593830000	118050000	81027000	37024000	172000000	102210000	69798000	514350000	301070000	213280000	529670000	300990000	228690000
GLE2	1	3	3	3	1	0	0	0	1	2	0	2	40.522	365	NaN	NaN	NaN	NaN	NaN	1.3753	NaN	1.1707	120440000	61780000	58662000	0	0	0	0	0	0	0	0	0	0	0	0	21011000	9915000	11096000	25293000	9822800	15470000	0	0	0	74137000	42042000	32095000
LSM4	1	2	2	2	2	1	1	1	0	1	1	1	21.276	187	NaN	NaN	1.0716	NaN	NaN	NaN	NaN	NaN	496670000	268910000	227760000	62919000	36268000	26652000	163320000	78755000	84568000	231810000	129490000	102320000	0	0	0	0	0	0	4739400	3187200	1552200	16672000	11157000	5514700	17200000	10051000	7149000
TMN3	1	2	2	2	1	1	1	1	2	1	2	1	81.545	706	NaN	NaN	NaN	NaN	NaN	NaN	1.1933	NaN	464910000	238350000	226560000	102650000	59329000	43318000	96769000	47995000	48774000	91924000	46028000	45896000	106510000	52364000	54145000	6321300	5023700	1297600	4744200	2844000	1900200	44836000	18252000	26584000	11158000	6511200	4646500
LCP5	1	5	5	5	4	3	3	3	1	0	0	0	40.794	357	0.88068	0.86976	0.75986	0.94506	NaN	NaN	NaN	NaN	2788500000	1658600000	1130000000	889070000	524420000	364650000	744210000	438410000	305800000	506840000	318920000	187920000	636110000	369910000	266200000	12325000	6944000	5381300	0	0	0	0	0	0	0	0	0
VFA1	1	1	1	1	0	0	0	1	0	0	0	0	23.488	203	NaN	NaN	NaN	NaN	NaN	NaN	NaN	NaN	178870000	98400000	80468000	0	0	0	0	0	0	0	0	0	178870000	98400000	80468000	0	0	0	0	0	0	0	0	0	0	0	0
YER134C	1	2	2	2	2	1	1	0	0	0	0	0	20.441	178	1.1377	NaN	NaN	NaN	NaN	NaN	NaN	NaN	296150000	145640000	150510000	229830000	115080000	114760000	66320000	30562000	35759000	0	0	0	0	0	0	0	0	0	0	0	0	0	0	0	0	0	0
YER137C	1	2	2	2	1	2	2	1	0	0	0	0	16.603	148	NaN	1.4932	NaN	NaN	NaN	NaN	NaN	NaN	237890000	119900000	117990000	67985000	44782000	23203000	88718000	36388000	52329000	53179000	27291000	25888000	28006000	11437000	16569000	0	0	0	0	0	0	0	0	0	0	0	0
RTR1	1	3	3	3	1	1	2	1	0	0	1	0	26.239	226	NaN	NaN	NaN	NaN	NaN	NaN	NaN	NaN	98018000	33137000	64881000	0	0	0	0	0	0	44118000	0	44118000	0	0	0	0	0	0	0	0	0	53900000	33137000	20763000	0	0	0
COX15	1	3	3	3	2	2	3	3	0	0	1	0	54.658	486	1.1715	0.89837	0.80932	0.98208	NaN	NaN	NaN	NaN	1674400000	960820000	713560000	439440000	235180000	204260000	350050000	201150000	148900000	548160000	328170000	219990000	278630000	161830000	116800000	0	0	0	0	0	0	58092000	34497000	23595000	0	0	0
DDI1	1	1	1	1	0	1	1	0	0	0	0	0	47.354	428	NaN	NaN	NaN	NaN	NaN	NaN	NaN	NaN	792210000	585080000	207130000	0	0	0	435030000	321590000	113440000	357180000	263490000	93686000	0	0	0	0	0	0	0	0	0	0	0	0	0	0	0
LSM5	1	2	2	2	1	1	2	1	0	1	0	1	10.423	93	0.94858	NaN	0.95434	1.0675	NaN	NaN	NaN	NaN	3251100000	1828800000	1422400000	2322200000	1328400000	993820000	462530000	246960000	215570000	279700000	152650000	127050000	174800000	93902000	80894000	0	0	0	1858200	1210200	648020	0	0	0	10012000	5634600	4377400
PEA2	1	7	7	7	4	4	3	1	0	0	1	1	48.164	420	0.81247	0.94772	NaN	NaN	NaN	NaN	NaN	NaN	1470800000	849140000	621620000	678840000	403960000	274870000	468070000	250260000	217800000	160750000	79289000	81458000	0	0	0	0	0	0	0	0	0	98511000	87351000	11160000	64597000	28273000	36324000
YER156C	1	6	6	6	5	3	3	4	1	2	2	1	38.174	338	0.81831	1.0148	0.91653	0.91157	NaN	0.53849	1.1733	NaN	5340700000	2950900000	2389800000	1592400000	899620000	692760000	1307100000	711400000	595710000	1140500000	627570000	512910000	1176800000	641710000	535090000	4627900	4627900	0	11068000	7883400	3184900	52255000	29128000	23127000	55997000	28934000	27063000
COG3	1	6	6	6	4	1	1	2	1	0	0	0	92.543	801	1.2112	NaN	NaN	NaN	NaN	NaN	NaN	NaN	539010000	302710000	236310000	455690000	260680000	195010000	0	0	0	20327000	11939000	8387200	58010000	26385000	31625000	4991000	3705400	1285600	0	0	0	0	0	0	0	0	0
FAU1	1	3	3	3	0	0	0	0	0	0	1	3	24.058	211	NaN	NaN	NaN	NaN	NaN	NaN	NaN	0.94841	196370000	131310000	65061000	0	0	0	0	0	0	0	0	0	0	0	0	0	0	0	0	0	0	61631000	26939000	34693000	134730000	104370000	30368000
IES2	1	3	3	3	2	2	3	2	0	0	0	0	36.153	320	1.0262	1.3107	1.5847	1.2144	NaN	NaN	NaN	NaN	6028300000	2745900000	3282400000	1828300000	1005700000	822570000	1472300000	660780000	811490000	2427100000	951150000	1475900000	300670000	128230000	172440000	0	0	0	0	0	0	0	0	0	0	0	0
PEX17	1	3	3	3	0	0	0	0	1	2	2	1	23.169	199	NaN	NaN	NaN	NaN	NaN	1.3969	1.8027	NaN	165170000	63132000	102040000	0	0	0	0	0	0	0	0	0	0	0	0	7716300	3612100	4104200	28429000	10863000	17565000	91506000	35080000	56427000	37519000	13577000	23943000
RRG9	1	1	1	1	0	0	0	0	1	1	1	1	25.274	214	NaN	NaN	NaN	NaN	NaN	NaN	NaN	NaN	52197000	34971000	17226000	0	0	0	0	0	0	0	0	0	0	0	0	8561200	7497800	1063500	28202000	17718000	10484000	9589800	6127200	3462600	5844200	3627800	2216400
VID27	1	8	8	8	7	4	5	6	0	0	0	1	88.845	782	0.99981	0.98258	1.0185	0.98737	NaN	NaN	NaN	NaN	2511200000	1417800000	1093400000	705530000	383030000	322500000	532610000	306660000	225950000	584250000	344240000	240010000	675670000	376170000	299500000	0	0	0	0	0	0	0	0	0	13148000	7702500	5445800
RIO2	1	1	1	1	1	1	0	0	0	0	0	0	49.124	425	NaN	NaN	NaN	NaN	NaN	NaN	NaN	NaN	514020000	295520000	218510000	367800000	214070000	153740000	146220000	81453000	64769000	0	0	0	0	0	0	0	0	0	0	0	0	0	0	0	0	0	0
RTT106	1	5	5	5	1	1	2	1	1	0	1	0	51.62	455	NaN	NaN	1.2789	NaN	NaN	NaN	NaN	NaN	738730000	429720000	309010000	0	0	0	113710000	56293000	57415000	243190000	119410000	123780000	0	0	0	162210000	137650000	24555000	0	0	0	219620000	116360000	103260000	0	0	0
PSY2	1	1	1	1	1	0	0	0	0	0	0	0	98.052	858	NaN	NaN	NaN	NaN	NaN	NaN	NaN	NaN	66512000	36450000	30062000	66512000	36450000	30062000	0	0	0	0	0	0	0	0	0	0	0	0	0	0	0	0	0	0	0	0	0
JLP2	1	1	1	1	1	1	0	0	0	0	0	0	24.665	208	1.1025	NaN	NaN	NaN	NaN	NaN	NaN	NaN	203770000	113020000	90746000	165690000	92795000	72899000	38075000	20227000	17848000	0	0	0	0	0	0	0	0	0	0	0	0	0	0	0	0	0	0
OSW5	1	1	1	1	0	0	0	0	0	0	1	1	16.384	148	NaN	NaN	NaN	NaN	NaN	NaN	NaN	NaN	92452000	55379000	37073000	0	0	0	0	0	0	0	0	0	0	0	0	0	0	0	0	0	0	54779000	34239000	20540000	37673000	21140000	16533000
MEP1;MEP3	2	2	2	2	1	0	1	1	2	2	2	1	54.201	492	NaN	NaN	NaN	NaN	NaN	NaN	NaN	NaN	9410400000	5231000000	4179400000	9397700000	5222100000	4175700000	0	0	0	0	0	0	0	0	0	8330900	5253200	3077700	4299700	3669000	630660	0	0	0	0	0	0
PRE6	1	8	8	8	5	2	2	2	1	1	2	0	28.439	254	0.9623	1.052	1.0033	1.0667	NaN	NaN	0.9079	NaN	8118400000	4357800000	3760700000	2722900000	1348300000	1374600000	1353200000	747670000	605570000	2312500000	1294100000	1018400000	1655600000	922340000	733240000	32853000	20289000	12564000	17283000	9627800	7655600	24041000	15447000	8594200	0	0	0
KHA1	1	1	1	1	0	0	0	0	0	0	1	1	97.11	873	NaN	NaN	NaN	NaN	NaN	NaN	NaN	NaN	12046000	7091100	4955200	0	0	0	0	0	0	0	0	0	0	0	0	0	0	0	0	0	0	7606100	3555200	4050900	4440300	3535900	904350
RFC4	1	3	3	3	0	1	1	2	0	0	2	1	36.149	323	NaN	NaN	1.2112	1.2732	NaN	NaN	1.0044	NaN	396080000	220690000	175390000	0	0	0	73833000	45156000	28678000	174800000	90166000	84637000	119360000	68294000	51066000	0	0	0	0	0	0	18348000	10671000	7676500	9738100	6406800	3331400
YTA7	1	6	6	6	0	3	4	4	0	0	0	0	157.41	1379	NaN	1.2568	0.99986	0.65994	NaN	NaN	NaN	NaN	574670000	323190000	251480000	0	0	0	136890000	75764000	61122000	152790000	84953000	67836000	284990000	162470000	122520000	0	0	0	0	0	0	0	0	0	0	0	0
VPS27	1	10	10	10	4	6	4	5	1	0	1	1	70.973	622	1.0214	1.1163	1.058	1.4956	NaN	NaN	NaN	NaN	2502800000	1205300000	1297500000	743170000	375970000	367200000	686990000	274580000	412400000	600310000	318900000	281410000	442520000	219280000	223240000	4376400	2720500	1655900	0	0	0	12975000	7134500	5840400	12411000	6680000	5731300
ATG3	1	1	1	1	1	1	0	0	0	0	0	0	35.887	310	0.95924	NaN	NaN	NaN	NaN	NaN	NaN	NaN	485840000	307640000	178200000	431580000	267510000	164070000	54261000	40129000	14131000	0	0	0	0	0	0	0	0	0	0	0	0	0	0	0	0	0	0
LTP1	1	3	3	3	3	3	3	0	1	1	1	1	18.675	161	1.0759	1.039	1.0312	NaN	NaN	NaN	NaN	1.0527	2360300000	1294900000	1065400000	890520000	482520000	408000000	906680000	511210000	395470000	395170000	200670000	194490000	0	0	0	18051000	10339000	7711300	9429700	6552400	2877300	35041000	24371000	10670000	105380000	59207000	46171000
RFC2	1	7	7	7	3	2	3	4	1	1	3	2	39.741	353	0.93701	1.0806	1.0188	1.1176	NaN	NaN	0.97228	0.97464	2816300000	1561000000	1255300000	715990000	414150000	301840000	751760000	388660000	363100000	462470000	259760000	202710000	502000000	261210000	240790000	5762600	4717700	1044900	36726000	18977000	17750000	306690000	195080000	111620000	34906000	18500000	16406000
NTA1	1	3	3	3	2	0	1	0	0	0	0	1	51.896	457	1.3048	NaN	NaN	NaN	NaN	NaN	NaN	NaN	224050000	96097000	127950000	173200000	81964000	91235000	0	0	0	50850000	14133000	36717000	0	0	0	0	0	0	0	0	0	0	0	0	0	0	0
PGD1	1	4	4	4	4	1	0	0	0	0	0	0	43.079	397	0.97309	NaN	NaN	NaN	NaN	NaN	NaN	NaN	213080000	117590000	95493000	175180000	96855000	78321000	37905000	20733000	17172000	0	0	0	0	0	0	0	0	0	0	0	0	0	0	0	0	0	0
SEC9	1	2	2	2	1	2	0	0	0	0	0	0	73.623	651	NaN	1.0579	NaN	NaN	NaN	NaN	NaN	NaN	215070000	124430000	90637000	123650000	71595000	52051000	91421000	52834000	38587000	0	0	0	0	0	0	0	0	0	0	0	0	0	0	0	0	0	0
ARG2	1	3	3	3	0	0	0	0	0	0	2	2	65.609	574	NaN	NaN	NaN	NaN	NaN	NaN	0.99648	0.77472	55728000	33101000	22627000	0	0	0	0	0	0	0	0	0	0	0	0	0	0	0	0	0	0	36462000	21596000	14865000	19266000	11505000	7761700
UTP18	1	6	6	6	5	4	4	2	3	1	1	3	66.423	594	1.019	0.84757	0.84699	0.54472	NaN	NaN	NaN	1.0589	6191100000	4056700000	2134400000	2100400000	1121800000	978630000	1843700000	1336200000	507460000	1463700000	1094000000	369620000	694670000	468470000	226190000	8634000	3871500	4762500	0	0	0	22879000	10716000	12164000	57111000	21528000	35583000
	1	3	3	3	3	2	2	0	0	0	0	0	33.934	299	1.1132	1.1895	NaN	NaN	NaN	NaN	NaN	NaN	1851200000	964250000	886910000	959330000	506180000	453150000	455920000	233650000	222270000	435910000	224420000	211480000	0	0	0	0	0	0	0	0	0	0	0	0	0	0	0
DLS1	1	1	1	1	1	0	1	1	0	0	0	0	18.792	167	NaN	NaN	NaN	NaN	NaN	NaN	NaN	NaN	217220000	121370000	95849000	0	0	0	0	0	0	102270000	61610000	40660000	114950000	59760000	55189000	0	0	0	0	0	0	0	0	0	0	0	0
CCT5	1	22	22	22	15	15	11	12	0	3	7	2	61.913	562	0.99583	0.96518	1.0041	1.02	NaN	0.66028	1.2736	0.9426	29199000000	16083000000	13116000000	9450400000	5157700000	4292700000	7810500000	4302000000	3508500000	6963000000	3870300000	3092700000	4850600000	2680100000	2170500000	0	0	0	9136500	6857900	2278600	79526000	46052000	33474000	36281000	20431000	15850000
TPM2	1	10	10	10	8	7	8	7	0	0	0	0	19.093	161	1.0221	1.0297	1.0144	1.0111	NaN	NaN	NaN	NaN	19439000000	10504000000	8934500000	7057200000	3856500000	3200700000	4485900000	2353700000	2132200000	3805700000	2048000000	1757700000	4090100000	2246200000	1843900000	0	0	0	0	0	0	0	0	0	0	0	0
ATM1	1	5	5	5	0	0	0	0	1	3	1	2	77.521	690	NaN	NaN	NaN	NaN	NaN	0.94993	1.0232	0.86015	128500000	75394000	53101000	0	0	0	0	0	0	0	0	0	0	0	0	2720500	1830800	889780	48948000	27781000	21167000	44545000	26662000	17883000	32282000	19120000	13162000
RRD1	1	1	1	1	1	0	1	0	0	0	0	0	45.082	393	NaN	NaN	NaN	NaN	NaN	NaN	NaN	NaN	473310000	240490000	232820000	108190000	54070000	54122000	0	0	0	365120000	186420000	178700000	0	0	0	0	0	0	0	0	0	0	0	0	0	0	0
TMA108	1	7	7	7	7	4	4	4	1	0	1	1	107.72	946	1.0376	1.1489	1.0876	1.1761	NaN	NaN	NaN	0.81206	5217500000	2921100000	2296400000	1798800000	985780000	813040000	1759100000	1007600000	751570000	667210000	358140000	309070000	950440000	543820000	406620000	1495000	1495000	0	0	0	0	11435000	6519500	4915200	28925000	17780000	11145000
VHS2	1	3	3	3	2	3	2	3	0	0	0	0	47.96	436	1.2471	1.279	1.2656	1.2653	NaN	NaN	NaN	NaN	1146600000	578730000	567850000	207210000	85473000	121730000	317730000	165830000	151900000	306930000	159340000	147590000	314720000	168090000	146630000	0	0	0	0	0	0	0	0	0	0	0	0
FKH1	1	1	1	1	1	1	1	1	0	0	0	0	53.489	484	NaN	NaN	NaN	NaN	NaN	NaN	NaN	NaN	679010000	389530000	289480000	166110000	89626000	76489000	200140000	120600000	79533000	79569000	42344000	37225000	233190000	136960000	96234000	0	0	0	0	0	0	0	0	0	0	0	0
ASG1	1	3	3	3	0	2	2	1	0	0	0	0	108.78	964	NaN	NaN	NaN	NaN	NaN	NaN	NaN	NaN	236410000	91549000	144860000	0	0	0	72123000	21974000	50150000	106460000	46780000	59677000	57834000	22795000	35038000	0	0	0	0	0	0	0	0	0	0	0	0
MET18	1	4	4	4	2	1	0	1	1	0	0	0	117.88	1032	NaN	NaN	NaN	NaN	NaN	NaN	NaN	NaN	143070000	65071000	78003000	106580000	59121000	47455000	0	0	0	0	0	0	0	0	0	36497000	5949700	30547000	0	0	0	0	0	0	0	0	0
RRT14	1	2	2	2	1	0	0	1	0	0	0	0	23.845	206	NaN	NaN	NaN	NaN	NaN	NaN	NaN	NaN	75016000	46997000	28019000	7022600	5014000	2008600	0	0	0	0	0	0	67994000	41983000	26010000	0	0	0	0	0	0	0	0	0	0	0	0
HPM1	1	4	4	4	4	3	3	2	0	0	0	0	42.514	377	0.95868	0.92786	1.0487	0.95558	NaN	NaN	NaN	NaN	1629400000	924440000	705000000	610310000	363130000	247180000	518950000	286210000	232740000	318600000	178660000	139950000	181570000	96436000	85136000	0	0	0	0	0	0	0	0	0	0	0	0
YIL108W	1	8	8	8	2	5	3	4	1	3	2	4	77.413	696	NaN	1.1045	1.2863	1.0745	NaN	0.76644	1.0905	0.92727	1704000000	865970000	838070000	130160000	70008000	60148000	355120000	184630000	170490000	379710000	197390000	182320000	657650000	309940000	347710000	7691900	4325200	3366700	11603000	7136800	4466500	49333000	28189000	21144000	112770000	64353000	48420000
MOB1	1	4	4	4	1	2	2	0	1	0	1	1	35.882	314	NaN	0.80628	0.72983	NaN	NaN	NaN	NaN	1.0992	1323900000	844570000	479330000	472420000	327290000	145130000	337560000	204020000	133540000	312260000	204910000	107360000	0	0	0	4900400	3049600	1850800	0	0	0	13670000	8116700	5553300	183080000	97188000	85892000
SHQ1	1	4	4	4	2	4	2	4	0	0	0	0	59.15	507	0.95271	0.9055	0.97234	1.0963	NaN	NaN	NaN	NaN	2163600000	1210800000	952790000	427400000	250930000	176470000	816630000	471890000	344750000	456390000	246840000	209550000	463140000	241120000	222020000	0	0	0	0	0	0	0	0	0	0	0	0
DPH1	1	2	2	2	1	1	1	2	0	0	0	0	48.31	425	NaN	NaN	0.7752	1.0533	NaN	NaN	NaN	NaN	682000000	419490000	262510000	110490000	67066000	43419000	88132000	48877000	39255000	370560000	247060000	123500000	112820000	56485000	56334000	0	0	0	0	0	0	0	0	0	0	0	0
BMT5	1	2	2	2	0	1	1	2	0	0	0	0	39.401	336	NaN	NaN	NaN	0.91819	NaN	NaN	NaN	NaN	134080000	89775000	44303000	0	0	0	46148000	32812000	13336000	43516000	28760000	14756000	44414000	28204000	16211000	0	0	0	0	0	0	0	0	0	0	0	0
UTP25	1	4	4	4	1	1	2	1	1	0	2	0	83.99	721	NaN	NaN	NaN	NaN	NaN	NaN	1.0844	NaN	604120000	346610000	257500000	165090000	89972000	75119000	169180000	104130000	65057000	129110000	77890000	51222000	104640000	53053000	51587000	17915000	12389000	5526500	0	0	0	18175000	9183400	8992000	0	0	0
ICE2	1	1	1	1	0	0	0	0	0	0	1	0	56.332	491	NaN	NaN	NaN	NaN	NaN	NaN	NaN	NaN	14524000	9827500	4696800	0	0	0	0	0	0	0	0	0	0	0	0	0	0	0	0	0	0	14524000	9827500	4696800	0	0	0
CAB2	1	4	4	4	3	2	0	0	0	0	1	0	41.866	365	1.1715	1.0725	NaN	NaN	NaN	NaN	0.71325	NaN	1370600000	413490000	957070000	1053900000	227110000	826760000	265820000	147020000	118800000	0	0	0	0	0	0	0	0	0	0	0	0	50864000	39354000	11510000	0	0	0
AIR1	1	1	1	1	0	1	0	1	0	0	0	0	41.63	360	NaN	NaN	NaN	NaN	NaN	NaN	NaN	NaN	384810000	229720000	155090000	0	0	0	89302000	55566000	33736000	0	0	0	295510000	174160000	121350000	0	0	0	0	0	0	0	0	0	0	0	0
YIL077C	1	1	1	1	0	0	0	0	1	0	0	0	36.946	320	NaN	NaN	NaN	NaN	NaN	NaN	NaN	NaN	1109700	0	1109700	0	0	0	0	0	0	0	0	0	0	0	0	1109700	0	1109700	0	0	0	0	0	0	0	0	0
SEC28	1	7	7	7	5	5	4	2	0	0	2	0	33.829	296	1.107	1.1538	1.085	1.0818	NaN	NaN	0.98735	NaN	1961200000	939800000	1021400000	897400000	432190000	465200000	544530000	269410000	275130000	455640000	208630000	247020000	54569000	23584000	30986000	0	0	0	0	0	0	9100000	5992400	3107600	0	0	0
SER33	1	7	4	4	5	4	6	4	0	0	1	0	51.188	469	1.0657	0.99782	1.0531	1.1342	NaN	NaN	NaN	NaN	8219000000	4287300000	3931700000	2585800000	1479100000	1106800000	1635400000	862440000	772940000	2326600000	1088900000	1237700000	1671100000	856890000	814250000	0	0	0	0	0	0	0	0	0	0	0	0
MAM33	1	3	3	3	2	2	2	2	1	2	1	1	30.132	266	1.1267	0.71346	1.0647	1.0409	NaN	0.64211	NaN	NaN	7026700000	3946000000	3080800000	1524600000	887810000	636760000	429980000	250370000	179600000	1865800000	974850000	890990000	2974300000	1676000000	1298300000	24871000	20891000	3980100	44232000	34530000	9701500	113190000	73279000	39912000	49760000	28266000	21494000
FIS1	1	5	5	5	0	1	1	0	0	2	5	2	17.733	155	NaN	NaN	NaN	NaN	NaN	1.0333	1.105	1.1282	310450000	161510000	148940000	0	0	0	49567000	21587000	27980000	55802000	27657000	28144000	0	0	0	0	0	0	12374000	7290100	5084000	135240000	74330000	60910000	57466000	30643000	26823000
EFM4	1	2	2	2	2	1	1	1	0	0	0	0	28.689	257	0.96482	NaN	NaN	NaN	NaN	NaN	NaN	NaN	862640000	506950000	355700000	371010000	225360000	145660000	160830000	88834000	71998000	159040000	93875000	65165000	171760000	98879000	72879000	0	0	0	0	0	0	0	0	0	0	0	0
ARC15	1	1	1	1	0	0	0	0	1	1	1	0	17.134	154	NaN	NaN	NaN	NaN	NaN	NaN	1.2345	NaN	258640000	157670000	100970000	0	0	0	0	0	0	0	0	0	0	0	0	67070000	42240000	24830000	130340000	82612000	47732000	61231000	32821000	28410000	0	0	0
DFG10	1	1	1	1	0	0	0	0	0	1	1	1	30.305	253	NaN	NaN	NaN	NaN	NaN	NaN	NaN	NaN	0	0	0	0	0	0	0	0	0	0	0	0	0	0	0	0	0	0	0	0	0	0	0	0	0	0	0
AGE2	1	2	2	2	2	1	1	1	0	0	0	0	32.638	298	0.86044	NaN	0.93617	NaN	NaN	NaN	NaN	NaN	859770000	518370000	341400000	364720000	210740000	153980000	152350000	92222000	60126000	209300000	123490000	85809000	133400000	91923000	41476000	0	0	0	0	0	0	0	0	0	0	0	0
GVP36	1	13	13	13	11	9	9	8	1	5	7	7	36.67	326	1.0058	1.015	1.0656	1.1328	NaN	1.3064	1.1269	1.0166	18978000000	10224000000	8753400000	6576500000	3587000000	2989500000	4654600000	2524500000	2130100000	4084700000	2205900000	1878800000	3039300000	1555300000	1484000000	14700000	8621800	6078000	62303000	35404000	26899000	325460000	184700000	140760000	220120000	122880000	97240000
APQ12	1	2	2	2	0	0	0	0	0	1	1	2	16.507	138	NaN	NaN	NaN	NaN	NaN	NaN	NaN	0.62053	29919000	18009000	11910000	0	0	0	0	0	0	0	0	0	0	0	0	0	0	0	2234900	1440900	793970	4391200	3432300	958850	23293000	13136000	10157000
CST6	1	4	4	4	2	1	1	0	1	1	1	1	65.263	587	1.1059	NaN	NaN	NaN	NaN	NaN	NaN	NaN	613420000	360010000	253420000	318690000	175030000	143660000	88567000	48789000	39778000	117060000	80599000	36456000	0	0	0	21233000	15224000	6009100	13171000	7961200	5209400	25243000	15099000	10144000	29464000	17304000	12159000
HIS6	1	5	5	5	3	4	4	3	0	0	0	1	29.556	261	0.87481	0.93339	0.95404	0.93374	NaN	NaN	NaN	NaN	2988900000	1674000000	1314900000	721570000	396720000	324850000	691720000	383430000	308290000	1037400000	583510000	453930000	528270000	301960000	226310000	0	0	0	0	0	0	0	0	0	9901400	8397900	1503500
MNT3	1	4	4	4	0	0	0	1	2	2	1	1	72.409	630	NaN	NaN	NaN	1.0031	NaN	0.96559	NaN	NaN	7683300000	4611300000	3072000000	0	0	0	0	0	0	0	0	0	7657200000	4596500000	3060700000	5039400	4261000	778430	4492700	2491300	2001400	9223200	4280500	4942700	7303000	3689300	3613700
DOT5	1	4	4	4	3	4	3	3	0	0	0	0	24.119	215	0.99589	1.0197	1.168	1.5355	NaN	NaN	NaN	NaN	3779900000	2014600000	1765300000	902270000	520290000	381980000	1076900000	586290000	490590000	970840000	523510000	447330000	829930000	384530000	445410000	0	0	0	0	0	0	0	0	0	0	0	0
SGN1	1	6	6	6	6	1	1	1	1	0	0	1	28.954	250	0.92444	NaN	NaN	NaN	NaN	NaN	NaN	NaN	2850200000	1782500000	1067700000	2375700000	1540200000	835490000	173900000	84276000	89624000	103710000	58735000	44976000	156010000	76198000	79809000	6860500	4070300	2790200	0	0	0	0	0	0	34080000	19068000	15012000
AIM21	1	12	12	12	8	7	8	6	0	0	0	0	74.762	679	1.0044	1.1042	1.1103	1.1131	NaN	NaN	NaN	NaN	6033800000	3226700000	2807200000	1305600000	692910000	612660000	2695900000	1518600000	1177300000	1472800000	735380000	737380000	559570000	279760000	279810000	0	0	0	0	0	0	0	0	0	0	0	0
	1	1	1	1	0	0	0	0	0	1	0	1	86.978	764	NaN	NaN	NaN	NaN	NaN	NaN	NaN	NaN	81919000	28568000	53352000	0	0	0	0	0	0	0	0	0	0	0	0	0	0	0	19506000	4944100	14562000	0	0	0	62414000	23624000	38790000
MSL1	1	1	1	1	0	1	0	0	0	0	0	0	12.83	111	NaN	NaN	NaN	NaN	NaN	NaN	NaN	NaN	82938000	36255000	46683000	0	0	0	82938000	36255000	46683000	0	0	0	0	0	0	0	0	0	0	0	0	0	0	0	0	0	0
DSN1	1	2	2	2	1	0	1	1	0	0	0	0	65.691	576	NaN	NaN	NaN	NaN	NaN	NaN	NaN	NaN	153470000	99894000	53576000	82435000	52711000	29724000	0	0	0	30456000	20854000	9601600	40578000	26328000	14250000	0	0	0	0	0	0	0	0	0	0	0	0
YIR014W	1	1	1	1	0	0	0	0	0	1	0	0	27.6	242	NaN	NaN	NaN	NaN	NaN	NaN	NaN	NaN	67251000	33275000	33976000	0	0	0	0	0	0	0	0	0	0	0	0	0	0	0	67251000	33275000	33976000	0	0	0	0	0	0
INA22	1	4	4	4	1	1	1	1	1	2	4	3	24.597	216	NaN	NaN	1.0641	NaN	NaN	1.1345	1.1577	0.98236	1983800000	1066000000	917850000	500220000	272330000	227880000	468850000	257570000	211280000	574170000	299240000	274930000	128580000	70812000	57771000	8144400	5917400	2227000	44720000	24801000	19918000	203620000	104270000	99349000	55525000	31040000	24485000
MGA2	1	1	1	1	1	0	0	0	0	0	0	0	127.05	1113	NaN	NaN	NaN	NaN	NaN	NaN	NaN	NaN	151080000	96223000	54853000	151080000	96223000	54853000	0	0	0	0	0	0	0	0	0	0	0	0	0	0	0	0	0	0	0	0	0
YIR035C	1	2	2	2	1	1	1	1	1	0	0	1	27.48	254	NaN	NaN	NaN	NaN	NaN	NaN	NaN	NaN	594880000	291920000	302960000	127190000	43900000	83287000	123380000	61922000	61460000	193170000	102970000	90197000	142610000	78081000	64526000	4561100	2591800	1969300	0	0	0	0	0	0	3968000	2451900	1516100
IRC24	1	4	4	4	4	1	1	1	0	0	0	1	28.804	263	1.0855	NaN	NaN	1.3314	NaN	NaN	NaN	NaN	1123000000	576090000	546900000	777050000	411520000	365530000	84561000	31252000	53310000	87497000	47613000	39884000	173880000	85709000	88172000	0	0	0	0	0	0	0	0	0	0	0	0
SAP185	1	2	2	2	1	0	0	1	0	0	0	0	121.4	1058	NaN	NaN	NaN	NaN	NaN	NaN	NaN	NaN	134430000	86380000	48048000	114680000	76393000	38287000	0	0	0	0	0	0	19748000	9986200	9761500	0	0	0	0	0	0	0	0	0	0	0	0
REE1	1	1	1	1	1	1	1	1	0	0	0	0	21.966	198	NaN	1.0157	NaN	NaN	NaN	NaN	NaN	NaN	701020000	417790000	283230000	233040000	144980000	88063000	293830000	169010000	124820000	91053000	52073000	38980000	83090000	51731000	31359000	0	0	0	0	0	0	0	0	0	0	0	0
OPT1	1	2	2	2	0	0	0	0	1	0	1	1	91.614	799	NaN	NaN	NaN	NaN	NaN	NaN	NaN	NaN	55470000	40828000	14642000	0	0	0	0	0	0	0	0	0	0	0	0	37386000	30765000	6620700	0	0	0	18084000	10063000	8021700	0	0	0
CHS6	1	4	4	4	1	1	0	1	0	0	1	0	86.041	746	NaN	NaN	NaN	NaN	NaN	NaN	NaN	NaN	89023000	26628000	62395000	24861000	14119000	10742000	0	0	0	0	0	0	59310000	9933500	49376000	0	0	0	0	0	0	4852400	2575800	2276600	0	0	0
MAD1	1	10	10	10	5	5	5	5	1	0	2	1	87.65	749	1.1238	39.627	1.0623	16.314	NaN	NaN	NaN	NaN	3802300000	594730000	3207500000	325890000	166140000	159750000	954300000	101500000	852800000	1092000000	166730000	925290000	902000000	159620000	742370000	68838000	0	68838000	0	0	0	286990000	727090	286260000	172230000	0	172230000
MAD2	1	2	2	2	2	1	1	1	0	0	0	0	22.284	196	1.2572	NaN	NaN	NaN	NaN	NaN	NaN	NaN	302740000	175320000	127420000	177940000	96284000	81655000	51064000	40299000	10765000	0	0	0	73741000	38735000	35005000	0	0	0	0	0	0	0	0	0	0	0	0
CEP3	1	1	1	1	1	0	0	0	0	0	0	0	71.357	608	NaN	NaN	NaN	NaN	NaN	NaN	NaN	NaN	0	0	0	0	0	0	0	0	0	0	0	0	0	0	0	0	0	0	0	0	0	0	0	0	0	0	0
LYS14	1	1	1	1	1	0	0	0	0	0	0	0	89.396	790	NaN	NaN	NaN	NaN	NaN	NaN	NaN	NaN	100900000	64514000	36388000	100900000	64514000	36388000	0	0	0	0	0	0	0	0	0	0	0	0	0	0	0	0	0	0	0	0	0
CDC1	1	1	1	1	0	0	0	0	1	1	0	1	57.147	491	NaN	NaN	NaN	NaN	NaN	NaN	NaN	NaN	41838000	28786000	13052000	0	0	0	0	0	0	0	0	0	0	0	0	30931000	21312000	9619700	10906000	7474000	3432000	0	0	0	0	0	0
BUD6	1	7	7	7	3	3	4	3	0	0	0	0	88.816	788	0.72759	0.8821	0.92557	1.0053	NaN	NaN	NaN	NaN	1737000000	1036900000	700150000	368900000	257250000	111650000	783390000	425650000	357740000	397160000	256000000	141160000	187570000	97963000	89606000	0	0	0	0	0	0	0	0	0	0	0	0
IAH1	1	2	2	2	0	1	0	0	0	0	0	1	27.346	238	NaN	NaN	NaN	NaN	NaN	NaN	NaN	NaN	32311000	22274000	10037000	0	0	0	0	0	0	0	0	0	0	0	0	0	0	0	0	0	0	0	0	0	32311000	22274000	10037000
VMA21	1	1	1	1	0	0	0	0	0	1	1	1	8.4349	77	NaN	NaN	NaN	NaN	NaN	NaN	NaN	NaN	57957000	34899000	23058000	0	0	0	0	0	0	0	0	0	0	0	0	0	0	0	8721900	5293300	3428600	27593000	15780000	11813000	21642000	13825000	7816200
FKH2	1	3	3	3	2	1	0	0	1	1	0	0	94.373	862	0.97959	NaN	NaN	NaN	NaN	NaN	NaN	NaN	335160000	219340000	115820000	138490000	82371000	56115000	31563000	22178000	9385700	0	0	0	0	0	0	116900000	84562000	32339000	48207000	30230000	17977000	0	0	0	0	0	0
GCD10	1	5	5	5	3	4	2	3	0	0	0	0	54.389	478	0.86999	0.75609	0.8581	0.93238	NaN	NaN	NaN	NaN	2906300000	1674200000	1232100000	1050200000	598340000	451880000	423340000	256840000	166500000	730860000	438580000	292280000	701860000	380430000	321440000	0	0	0	0	0	0	0	0	0	0	0	0
GLC8	1	10	10	10	10	7	5	5	0	0	0	0	26.649	229	0.93637	1.0843	1.0692	1.1009	NaN	NaN	NaN	NaN	8450900000	4573900000	3876900000	2587000000	1518600000	1068400000	2039500000	1072200000	967260000	2214500000	1134100000	1080400000	1609900000	849050000	760880000	0	0	0	0	0	0	0	0	0	0	0	0
DIM1	1	6	6	6	3	4	3	2	0	0	0	1	35.95	318	0.78647	0.89004	0.87128	0.83324	NaN	NaN	NaN	NaN	1713700000	991670000	722020000	435080000	252460000	182620000	475680000	261830000	213850000	560490000	333060000	227440000	226820000	134750000	92062000	0	0	0	0	0	0	0	0	0	15619000	9571000	6047500
UFE1	1	2	2	2	1	1	0	1	1	1	2	2	40.539	346	NaN	NaN	NaN	NaN	NaN	NaN	1.0716	1.0731	1591900000	910410000	681450000	816230000	449520000	366710000	271440000	150210000	121230000	0	0	0	51074000	37333000	13741000	130320000	85718000	44602000	18108000	12068000	6040600	194870000	114550000	80318000	109810000	61008000	48804000
THI6	1	1	1	1	0	1	1	0	0	0	0	0	58.058	540	NaN	NaN	NaN	NaN	NaN	NaN	NaN	NaN	184510000	113540000	70974000	0	0	0	82269000	43945000	38324000	102240000	69595000	32650000	0	0	0	0	0	0	0	0	0	0	0	0	0	0	0
TFG1	1	14	14	14	8	6	8	7	0	0	2	0	82.193	735	1.0302	0.93185	0.9485	1.0366	NaN	NaN	2.199	NaN	3986900000	2244800000	1742100000	1493200000	881610000	611570000	614870000	320300000	294570000	854720000	504270000	350450000	943650000	498640000	445010000	0	0	0	0	0	0	80499000	39956000	40542000	0	0	0
TFG2	1	7	7	7	4	2	2	3	0	0	1	0	46.605	400	1.2563	NaN	0.5822	1.1221	NaN	NaN	NaN	NaN	1098700000	591690000	507010000	329060000	168630000	160430000	190030000	96986000	93045000	278960000	170120000	108840000	296040000	154420000	141620000	0	0	0	0	0	0	4613300	1531100	3082200	0	0	0
TES1	1	4	4	4	0	0	0	0	1	2	1	2	40.259	349	NaN	NaN	NaN	NaN	NaN	1.3009	NaN	0.73761	54974000	30626000	24348000	0	0	0	0	0	0	0	0	0	0	0	0	4246000	2489900	1756100	10235000	5224200	5011000	11699000	6790900	4907900	28794000	16121000	12673000
MAF1	1	1	1	1	1	0	1	0	0	0	0	0	44.732	395	NaN	NaN	NaN	NaN	NaN	NaN	NaN	NaN	139610000	65576000	74036000	0	0	0	0	0	0	139610000	65576000	74036000	0	0	0	0	0	0	0	0	0	0	0	0	0	0	0
YRB1	1	10	10	10	8	6	5	5	0	0	3	1	22.953	201	0.88343	0.92731	0.87758	0.88904	NaN	NaN	1.0948	NaN	32977000000	18919000000	14058000000	17117000000	9804500000	7312300000	5054400000	2794900000	2259500000	6082600000	3521900000	2560800000	4573900000	2711700000	1862200000	0	0	0	0	0	0	131360000	74411000	56949000	17428000	11375000	6053400
REF2	1	5	5	5	2	1	3	2	0	0	0	0	59.818	533	1.1837	NaN	0.9333	NaN	NaN	NaN	NaN	NaN	701980000	382610000	319370000	237370000	122850000	114510000	97890000	56203000	41687000	259530000	142250000	117270000	107190000	61295000	45897000	0	0	0	0	0	0	0	0	0	0	0	0
SBE2	1	1	1	1	1	1	0	1	0	0	0	0	98.97	864	NaN	NaN	NaN	NaN	NaN	NaN	NaN	NaN	139640000	73364000	66274000	0	0	0	53237000	28450000	24788000	0	0	0	86401000	44914000	41486000	0	0	0	0	0	0	0	0	0	0	0	0
XKS1	1	5	5	5	3	2	2	3	0	0	0	0	68.32	600	1.2871	1.1075	1.236	1.3292	NaN	NaN	NaN	NaN	556720000	288060000	268660000	137470000	71622000	65848000	113360000	59259000	54105000	113210000	60773000	52436000	192680000	96403000	96275000	0	0	0	0	0	0	0	0	0	0	0	0
EGT2	1	3	3	3	2	1	2	2	0	1	0	2	108.52	1041	1.0881	NaN	NaN	0.87482	NaN	NaN	NaN	0.48004	993360000	579090000	414270000	188630000	102490000	86143000	291320000	171260000	120060000	343320000	212850000	130480000	117520000	57252000	60272000	0	0	0	12624000	6961100	5663200	0	0	0	39939000	28283000	11657000
PFA3	1	1	1	1	0	0	0	0	1	1	1	1	39.183	336	NaN	NaN	NaN	NaN	NaN	NaN	NaN	NaN	49072000	31277000	17794000	0	0	0	0	0	0	0	0	0	0	0	0	10065000	6995900	3069300	21769000	14527000	7241600	9444900	5290300	4154600	7792700	4463800	3328900
PFS2	1	3	3	3	1	1	2	1	0	1	0	1	53.143	465	NaN	0.86468	0.9238	NaN	NaN	NaN	NaN	NaN	370420000	193720000	176700000	66061000	39040000	27021000	173240000	92749000	80489000	92878000	47862000	45016000	24298000	7294600	17004000	0	0	0	3342900	1598100	1744800	0	0	0	10604000	5178600	5425900
EMW1	1	7	7	7	6	5	6	6	0	0	0	0	102.34	904	0.95496	0.924	0.90417	0.86042	NaN	NaN	NaN	NaN	6820500000	3874900000	2945600000	2171900000	1284200000	887730000	1523400000	814710000	708660000	1472700000	834410000	638280000	1652500000	941600000	710910000	0	0	0	0	0	0	0	0	0	0	0	0
SLS1	1	7	7	7	1	0	0	0	1	4	2	2	73.256	643	NaN	NaN	NaN	NaN	NaN	1.1583	NaN	0.98851	7507800000	4437500000	3070300000	0	0	0	0	0	0	0	0	0	0	0	0	43455000	32272000	11183000	7430800000	4383500000	3047400000	11472000	7950400	3521500	22048000	13815000	8232800
ELP2	1	5	5	5	5	4	3	2	0	0	0	0	89.409	788	0.99854	0.91904	1.0187	0.86549	NaN	NaN	NaN	NaN	3486400000	2072000000	1414400000	1060500000	643650000	416830000	936520000	522390000	414130000	727240000	438220000	289020000	762190000	467730000	294460000	0	0	0	0	0	0	0	0	0	0	0	0
SER2	1	5	5	5	3	1	4	3	1	1	0	1	34.207	309	1.1854	1.2715	1.1635	1.0432	NaN	NaN	NaN	NaN	3136800000	1776200000	1360600000	1008000000	664640000	343320000	287280000	135430000	151850000	974080000	516580000	457500000	805550000	414810000	390730000	8007300	6299000	1708200	9417300	7243400	2173900	0	0	0	44525000	31235000	13291000
	1	5	5	5	2	1	3	1	0	2	1	1	45.213	411	1.0945	NaN	1.0275	NaN	NaN	0.79964	NaN	NaN	634480000	378470000	256010000	159080000	87717000	71361000	116880000	58554000	58327000	89628000	42036000	47592000	0	0	0	0	0	0	20368000	14710000	5657900	172380000	115070000	57303000	76154000	60383000	15771000
QRI1	1	16	16	16	6	4	5	5	1	2	6	8	53.475	477	0.82825	0.94407	1.148	1.1949	NaN	0.73953	1.0311	1.0137	3914400000	1975800000	1938600000	912820000	471660000	441170000	702220000	344780000	357440000	1167300000	652510000	514760000	813850000	380110000	433740000	1527600	978350	549220	30059000	16098000	13961000	153900000	52618000	101290000	132730000	57009000	75725000
SMD3	1	3	3	3	2	1	0	1	0	0	1	0	11.224	101	0.97399	NaN	NaN	NaN	NaN	NaN	NaN	NaN	228530000	129990000	98532000	98611000	56897000	41714000	70203000	40193000	30011000	0	0	0	56378000	30881000	25497000	0	0	0	0	0	0	3332900	2022000	1310800	0	0	0
GCN20	1	16	16	16	10	7	4	5	1	1	7	7	85.026	752	1.0743	1.094	1.0366	1.1209	NaN	NaN	0.95878	1.0247	9187300000	5014500000	4172800000	5101300000	2767400000	2333900000	1458800000	775720000	683130000	1067100000	609450000	457610000	1122700000	609340000	513360000	28440000	13962000	14478000	629450	416970	212480	189720000	114620000	75096000	218620000	123620000	94992000
RGD2	1	8	8	8	3	4	1	1	0	3	3	2	82.208	714	1.1712	1.0385	NaN	NaN	NaN	0.83767	1.0921	0.93443	1023800000	566860000	456940000	181780000	102110000	79673000	386090000	202540000	183550000	145030000	76532000	68502000	77750000	39154000	38595000	0	0	0	109300000	69360000	39937000	56106000	35987000	20119000	67743000	41180000	26564000
FMP32	1	3	3	3	1	1	1	1	0	0	2	1	24.018	207	NaN	NaN	NaN	NaN	NaN	NaN	0.88893	0.83107	1063800000	574350000	489490000	204940000	110770000	94171000	238950000	127620000	111330000	262750000	138640000	124100000	196680000	102070000	94618000	0	0	0	0	0	0	109890000	62580000	47311000	50631000	32671000	17960000
OTU1	1	2	2	2	2	1	0	1	0	0	0	0	33.51	301	1.3272	1.3033	NaN	NaN	NaN	NaN	NaN	NaN	271640000	127940000	143700000	68920000	32095000	36825000	200530000	95842000	104690000	0	0	0	2187100	0	2187100	0	0	0	0	0	0	0	0	0	0	0	0
CAK1	1	3	3	3	2	0	0	1	0	0	0	0	42.186	368	NaN	NaN	NaN	NaN	NaN	NaN	NaN	NaN	59222000	41516000	17706000	43819000	30326000	13493000	0	0	0	0	0	0	15403000	11190000	4213000	0	0	0	0	0	0	0	0	0	0	0	0
CAF16	1	2	2	2	1	1	2	1	0	0	0	0	33.09	289	NaN	NaN	1.1117	NaN	NaN	NaN	NaN	NaN	392830000	197100000	195740000	0	0	0	73147000	32012000	41135000	235140000	118960000	116180000	84546000	46123000	38423000	0	0	0	0	0	0	0	0	0	0	0	0
BUD27	1	15	15	15	6	8	9	6	0	0	0	0	91.421	796	0.94229	0.98029	1.0237	1.0759	NaN	NaN	NaN	NaN	3641100000	2484200000	1156900000	1775000000	1293800000	481270000	788020000	546630000	241380000	742350000	455800000	286550000	335710000	187960000	147750000	0	0	0	0	0	0	0	0	0	0	0	0
GAT1	1	1	1	1	0	0	0	1	0	0	0	0	56.327	510	NaN	NaN	NaN	NaN	NaN	NaN	NaN	NaN	0	0	0	0	0	0	0	0	0	0	0	0	0	0	0	0	0	0	0	0	0	0	0	0	0	0	0
GNA1	1	2	2	2	1	1	1	1	0	0	0	0	18.135	159	NaN	NaN	NaN	NaN	NaN	NaN	NaN	NaN	815450000	327500000	487950000	234240000	111630000	122610000	285640000	62074000	223570000	120970000	68411000	52564000	174590000	85387000	89207000	0	0	0	0	0	0	0	0	0	0	0	0
IES1	1	7	7	7	3	3	3	4	0	1	0	0	78.752	692	0.90385	1.0789	0.84126	0.8976	NaN	NaN	NaN	NaN	571540000	305290000	266250000	183780000	88517000	95263000	148090000	75475000	72618000	171210000	100670000	70533000	63630000	38394000	25236000	0	0	0	4824100	2226800	2597300	0	0	0	0	0	0
BLM10	1	5	5	5	2	2	3	2	0	0	0	0	245.99	2143	NaN	1.4437	1.2391	1.0446	NaN	NaN	NaN	NaN	21663000000	11850000000	9813400000	624060000	297950000	326110000	653680000	291700000	361980000	1035800000	540540000	495270000	19350000000	10720000000	8630100000	0	0	0	0	0	0	0	0	0	0	0	0
RPN11	1	8	8	8	7	5	5	5	1	0	0	1	34.398	306	1.1516	1.0593	1.1104	1.0676	NaN	NaN	NaN	NaN	6522100000	3766700000	2755500000	2356100000	1411500000	944540000	1502300000	809620000	692640000	1272400000	743750000	528650000	1351700000	778260000	573470000	22026000	14794000	7231600	0	0	0	0	0	0	17664000	8732600	8931400
YFH7	1	2	2	2	0	1	1	0	0	0	0	0	39.885	353	NaN	NaN	NaN	NaN	NaN	NaN	NaN	NaN	101870000	61884000	39982000	0	0	0	101870000	61884000	39982000	0	0	0	0	0	0	0	0	0	0	0	0	0	0	0	0	0	0
FAR7	1	3	3	3	0	0	0	0	1	2	3	2	25.915	221	NaN	NaN	NaN	NaN	NaN	1.0823	1.1807	NaN	246320000	122280000	124030000	0	0	0	0	0	0	0	0	0	0	0	0	5332000	3932600	1399400	33123000	17763000	15360000	207860000	100590000	107270000	0	0	0
UBP6	1	12	12	12	9	8	8	6	2	2	1	2	57.11	499	0.95564	1.0112	1.0618	1.0929	NaN	NaN	NaN	0.40043	16252000000	8865600000	7386700000	5613700000	3219200000	2394500000	4582800000	2463700000	2119100000	3826700000	1953400000	1873300000	2124300000	1151000000	973230000	9528400	5623900	3904500	15023000	14628000	394530	15473000	8560000	6913000	64747000	49441000	15305000
IOC3	1	2	2	2	1	1	1	1	0	1	0	0	90.896	787	1.0332	NaN	0.96485	NaN	NaN	NaN	NaN	NaN	641440000	374100000	267340000	239000000	131930000	107070000	79728000	49984000	29744000	241590000	148810000	92776000	74541000	39353000	35188000	0	0	0	6585700	4019700	2566000	0	0	0	0	0	0
YFR016C	1	19	19	19	11	9	9	14	1	1	1	1	137.7	1233	1.0427	1.0418	1.1271	1.1109	NaN	NaN	NaN	NaN	47180000000	26873000000	20307000000	11437000000	6346200000	5090500000	1204200000	567830000	636380000	926720000	455780000	470930000	1478000000	816370000	661660000	4422200000	2927300000	1494800000	4497500000	2492600000	2004900000	9708500000	5723000000	3985600000	13506000000	7543600000	5962300000
RSC8	1	22	22	22	14	12	11	9	0	4	1	5	63.167	557	0.99016	1.0016	0.96781	0.93701	NaN	1.8554	NaN	0.92828	21728000000	12125000000	9602400000	4490400000	2622700000	1867700000	2595500000	1360800000	1234700000	2506100000	1371700000	1134400000	11829000000	6679400000	5149800000	0	0	0	37212000	18710000	18502000	26035000	14963000	11072000	243410000	57082000	186330000
SAP155	1	4	4	4	1	3	3	1	0	0	0	0	115	1002	NaN	0.84774	1.4466	NaN	NaN	NaN	NaN	NaN	780420000	432910000	347510000	125530000	57028000	68503000	381900000	224850000	157050000	205200000	110180000	95021000	67782000	40851000	26931000	0	0	0	0	0	0	0	0	0	0	0	0
IRC6	1	1	1	1	1	0	0	0	0	0	0	0	27.878	237	NaN	NaN	NaN	NaN	NaN	NaN	NaN	NaN	0	0	0	0	0	0	0	0	0	0	0	0	0	0	0	0	0	0	0	0	0	0	0	0	0	0	0
BNA6	1	2	2	2	2	1	1	1	0	0	0	0	32.365	295	0.73166	NaN	NaN	NaN	NaN	NaN	NaN	NaN	678460000	404020000	274440000	272500000	190520000	81981000	145140000	81779000	63364000	133250000	61162000	72084000	127570000	70558000	57016000	0	0	0	0	0	0	0	0	0	0	0	0
RET2	1	7	7	7	3	2	2	1	0	0	4	3	60.627	546	1.0465	1.0451	1.0506	1.0077	NaN	NaN	0.94854	1.0539	8255500000	4389200000	3866200000	3989600000	2136300000	1853300000	2270700000	1169000000	1101700000	693000000	364810000	328180000	1047800000	562070000	485730000	0	0	0	0	0	0	185890000	117740000	68153000	68503000	39298000	29205000
TOS3	1	1	1	1	0	0	0	0	1	1	1	0	62.09	560	NaN	NaN	NaN	NaN	NaN	NaN	NaN	NaN	26441000	11176000	15265000	0	0	0	0	0	0	0	0	0	0	0	0	9366200	4771300	4594900	12536000	3432800	9103400	4538400	2971500	1566900	0	0	0
ROK1	1	15	15	15	8	5	5	2	0	1	5	4	63.652	564	0.93627	0.91343	0.87268	0.86354	NaN	NaN	0.91593	0.92305	7743500000	4440400000	3303100000	3956400000	2136400000	1820100000	1915700000	1177400000	738320000	996400000	615830000	380570000	611210000	351400000	259820000	0	0	0	13295000	12472000	823070	35136000	20911000	14225000	215360000	126030000	89327000
FIP1	1	5	5	5	4	2	1	3	0	0	0	0	35.777	327	0.81541	0.75012	NaN	0.86335	NaN	NaN	NaN	NaN	1623500000	969240000	654300000	842170000	510580000	331580000	258470000	146990000	111490000	179320000	100420000	78898000	343570000	211240000	132330000	0	0	0	0	0	0	0	0	0	0	0	0
SCD6	1	6	6	6	6	6	5	6	0	0	0	0	39.189	349	1.0901	1.0496	1.078	1.0345	NaN	NaN	NaN	NaN	7686400000	4158500000	3527900000	1998300000	1070200000	928040000	1916300000	1028000000	888290000	1814400000	983830000	830590000	1957400000	1076400000	881010000	0	0	0	0	0	0	0	0	0	0	0	0
MET12	1	2	2	2	2	1	1	1	0	0	0	0	73.941	657	0.50351	NaN	NaN	NaN	NaN	NaN	NaN	NaN	217250000	126780000	90473000	107540000	71012000	36528000	31210000	18475000	12736000	42459000	18288000	24171000	36044000	19005000	17038000	0	0	0	0	0	0	0	0	0	0	0	0
RPA43	1	5	5	5	5	5	4	3	0	0	0	0	36.224	326	0.85651	0.87086	0.85581	0.82194	NaN	NaN	NaN	NaN	5292100000	3234600000	2057500000	2065200000	1285100000	780070000	1600800000	1008400000	592480000	1072500000	601030000	471450000	553630000	340110000	213520000	0	0	0	0	0	0	0	0	0	0	0	0
CIN2	1	3	3	3	2	2	2	1	0	0	0	0	30.708	268	0.87383	1.0714	1.0511	NaN	NaN	NaN	NaN	NaN	512610000	271800000	240810000	169550000	99568000	69978000	141750000	73316000	68436000	159330000	75894000	83437000	41978000	23019000	18959000	0	0	0	0	0	0	0	0	0	0	0	0
NUP85	1	6	6	6	4	2	2	2	1	0	2	0	84.897	744	1.5019	1.4881	0.99375	1.0665	NaN	NaN	1.0676	NaN	3253100000	1595300000	1657800000	1013900000	454910000	558990000	1048200000	492590000	555620000	535580000	296640000	238950000	629370000	337280000	292090000	0	0	0	0	0	0	26015000	13894000	12121000	0	0	0
SAC3	1	2	2	2	1	2	0	0	0	0	0	0	149.57	1301	NaN	0.97917	NaN	NaN	NaN	NaN	NaN	NaN	240350000	143330000	97019000	126230000	80551000	45676000	114120000	62782000	51343000	0	0	0	0	0	0	0	0	0	0	0	0	0	0	0	0	0	0
STU2	1	7	7	7	1	5	1	1	0	0	1	1	100.92	888	NaN	1.1745	NaN	NaN	NaN	NaN	NaN	NaN	469810000	238680000	231130000	55382000	38297000	17085000	268700000	125780000	142920000	80491000	40707000	39784000	45711000	22734000	22977000	0	0	0	0	0	0	8885000	5358600	3526500	10638000	5804100	4833900
SUM1	1	17	17	17	8	8	6	6	0	0	4	2	118.2	1062	1.0593	0.8754	0.91809	0.90002	NaN	NaN	0.93538	NaN	3178300000	1731500000	1446800000	972030000	517080000	454960000	872010000	464970000	407030000	717840000	397200000	320650000	447900000	242120000	205780000	0	0	0	0	0	0	102140000	69069000	33069000	66381000	41037000	25344000
TAF1	1	5	5	5	1	3	1	0	1	0	0	0	120.69	1066	0.94142	0.79271	NaN	NaN	NaN	NaN	NaN	NaN	416970000	234240000	182730000	168070000	90736000	77331000	98292000	51744000	46547000	84117000	48640000	35477000	0	0	0	66496000	43117000	23379000	0	0	0	0	0	0	0	0	0
BDP1	1	2	2	2	1	2	1	1	0	0	0	0	67.687	594	1.0005	0.90436	0.7977	NaN	NaN	NaN	NaN	NaN	387560000	235030000	152530000	143370000	86418000	56947000	92731000	54958000	37773000	110430000	68127000	42302000	41032000	25522000	15510000	0	0	0	0	0	0	0	0	0	0	0	0
AIP1	1	12	12	12	5	3	7	5	1	1	2	2	67.325	615	1.1999	1.0482	1.2176	1.273	NaN	NaN	0.73725	0.65357	2067700000	1129600000	938070000	1250100000	676390000	573670000	112280000	61438000	50842000	398950000	214970000	183970000	231300000	122090000	109220000	491230	340670	150560	568770	320480	248290	40145000	29187000	10959000	33887000	24878000	9008300
APL6	1	6	6	6	2	0	3	1	0	0	2	1	91.606	809	0.86865	NaN	1.0112	1.0534	NaN	NaN	1.0363	NaN	1218100000	667810000	550330000	400970000	247810000	153160000	0	0	0	396610000	199210000	197400000	381710000	197380000	184330000	0	0	0	0	0	0	24955000	13621000	11334000	13890000	9795300	4094900
YAR1	1	6	6	6	6	3	4	5	0	0	0	0	22.355	200	0.9022	0.95547	0.91847	0.91716	NaN	NaN	NaN	NaN	17257000000	9810100000	7446700000	6588400000	3765500000	2822900000	3638500000	2013500000	1625000000	3239600000	1881000000	1358600000	3790300000	2150100000	1640200000	0	0	0	0	0	0	0	0	0	0	0	0
RPS10B	1	7	1	1	7	5	4	3	4	3	4	4	12.738	105	NaN	NaN	NaN	NaN	NaN	NaN	NaN	NaN	369140000	220440000	148700000	82471000	48035000	34436000	72178000	40624000	31553000	214490000	131780000	82714000	0	0	0	0	0	0	0	0	0	0	0	0	0	0	0
GUF1	1	2	2	2	0	0	0	0	1	1	1	2	73.188	645	NaN	NaN	NaN	NaN	NaN	NaN	NaN	0.93216	24554000	16878000	7675500	0	0	0	0	0	0	0	0	0	0	0	0	1778600	1406000	372540	1482600	981310	501330	8301900	6149400	2152500	12991000	8341700	4649100
TRS85	1	2	2	2	1	1	1	0	0	0	0	0	80.494	698	NaN	NaN	NaN	NaN	NaN	NaN	NaN	NaN	281750000	137480000	144280000	112100000	61483000	50617000	64617000	22245000	42373000	105040000	53750000	51287000	0	0	0	0	0	0	0	0	0	0	0	0	0	0	0
BUD13	1	2	2	2	2	1	2	1	0	0	0	0	30.472	266	0.699	NaN	0.82625	1.0151	NaN	NaN	NaN	NaN	1684700000	1005700000	679070000	1146400000	695580000	450830000	210160000	111870000	98287000	161200000	98596000	62602000	166970000	99619000	67351000	0	0	0	0	0	0	0	0	0	0	0	0
FYV8	1	4	4	4	0	1	1	3	0	0	0	0	90.797	817	NaN	NaN	NaN	1.2399	NaN	NaN	NaN	NaN	3103700000	1218000000	1885700000	0	0	0	1522100000	660950000	861160000	118570000	57631000	60944000	1463000000	499440000	963560000	0	0	0	0	0	0	0	0	0	0	0	0
POL31	1	1	1	1	1	0	0	0	0	0	0	0	55.295	487	NaN	NaN	NaN	NaN	NaN	NaN	NaN	NaN	111130000	58721000	52411000	111130000	58721000	52411000	0	0	0	0	0	0	0	0	0	0	0	0	0	0	0	0	0	0	0	0	0
GCD14	1	5	5	5	5	5	4	3	0	0	0	1	43.919	383	0.92393	0.89284	0.81926	0.75973	NaN	NaN	NaN	NaN	5214300000	2972200000	2242200000	1469800000	810390000	659370000	1492000000	852370000	639640000	1370200000	794690000	575540000	866390000	505580000	360810000	0	0	0	0	0	0	0	0	0	15920000	9119300	6800300
GPI2	1	2	2	2	0	0	0	0	0	2	1	0	32.577	280	NaN	NaN	NaN	NaN	NaN	1.0881	1.0741	NaN	105990000	65006000	40989000	0	0	0	0	0	0	0	0	0	0	0	0	0	0	0	22056000	13710000	8346200	83938000	51295000	32643000	0	0	0
CTK3	1	3	3	3	2	0	1	1	0	0	0	0	34.809	296	NaN	NaN	NaN	NaN	NaN	NaN	NaN	NaN	189890000	99299000	90592000	89013000	47638000	41374000	0	0	0	53264000	30252000	23013000	47613000	21409000	26204000	0	0	0	0	0	0	0	0	0	0	0	0
NMD5	2	3	3	3	2	3	3	2	0	0	0	0	119.97	1048	0.93378	1.0368	1.0085	1.0111	NaN	NaN	NaN	NaN	1130300000	608920000	521410000	252990000	135140000	117850000	468350000	257520000	210830000	193600000	105100000	88505000	215390000	111160000	104230000	0	0	0	0	0	0	0	0	0	0	0	0
HIT1	1	2	2	2	0	2	1	1	0	0	0	0	18.376	164	NaN	NaN	0.76676	NaN	NaN	NaN	NaN	NaN	224100000	134690000	89413000	0	0	0	20543000	10820000	9722700	136490000	84844000	51649000	67064000	39022000	28041000	0	0	0	0	0	0	0	0	0	0	0	0
RSF2	1	2	2	2	2	0	0	0	0	0	0	0	155.06	1380	NaN	NaN	NaN	NaN	NaN	NaN	NaN	NaN	0	0	0	0	0	0	0	0	0	0	0	0	0	0	0	0	0	0	0	0	0	0	0	0	0	0	0
GON7	1	3	3	3	2	1	1	1	0	0	0	0	13.605	123	NaN	NaN	NaN	NaN	NaN	NaN	NaN	NaN	398400000	199600000	198800000	105570000	58296000	47279000	47686000	24458000	23227000	168860000	90144000	78719000	76279000	26702000	49577000	0	0	0	0	0	0	0	0	0	0	0	0
PFD1	1	3	3	3	2	2	3	2	0	0	0	0	12.782	109	0.98256	0.95756	1.0725	0.93038	NaN	NaN	NaN	NaN	5794300000	3228100000	2566300000	2424000000	1454300000	969770000	1103300000	588000000	515330000	1866600000	956430000	910150000	400350000	229350000	171000000	0	0	0	0	0	0	0	0	0	0	0	0
RPL17B	1	11	1	1	6	5	5	6	9	8	9	9	20.551	184	NaN	NaN	NaN	NaN	NaN	NaN	0.86037	0.89143	4218600000	2469300000	1749400000	0	0	0	0	0	0	0	0	0	0	0	0	25663000	14655000	11008000	0	0	0	2851000000	1715000000	1136100000	1341900000	739660000	602270000
SET2	1	6	6	6	1	3	1	2	0	2	1	2	84.46	733	NaN	0.97452	NaN	0.82378	NaN	0.75988	NaN	0.89631	564680000	312960000	251720000	64663000	24537000	40126000	199480000	115640000	83833000	78180000	37582000	40597000	110600000	65796000	44801000	0	0	0	61186000	40283000	20902000	14274000	9172700	5100900	36304000	19945000	16359000
	1	1	1	1	0	0	0	0	1	0	0	0	61.524	555	NaN	NaN	NaN	NaN	NaN	NaN	NaN	NaN	11737000	7542600	4194300	0	0	0	0	0	0	0	0	0	0	0	0	11737000	7542600	4194300	0	0	0	0	0	0	0	0	0
JJJ2	1	2	2	2	0	0	1	1	0	0	1	1	67.389	583	NaN	NaN	NaN	NaN	NaN	NaN	NaN	NaN	246630000	134040000	112580000	0	0	0	0	0	0	110670000	66400000	44271000	95103000	49700000	45404000	0	0	0	0	0	0	14806000	8722200	6083700	26044000	9220900	16823000
CIS3	1	2	2	2	1	1	0	0	1	1	1	1	23.241	227	0.95774	0.82355	NaN	NaN	NaN	NaN	1.0426	NaN	1137800000	651280000	486540000	746270000	422030000	324240000	160070000	91222000	68848000	0	0	0	0	0	0	26639000	13704000	12935000	34787000	19005000	15782000	132790000	82267000	50521000	37270000	23049000	14221000
RPA34	1	10	10	10	7	3	4	4	0	0	2	1	26.875	233	0.94067	1.0042	0.83464	0.81098	NaN	NaN	0.2512	NaN	5658300000	3351800000	2306600000	2798700000	1626400000	1172300000	735360000	416610000	318740000	1161800000	673300000	488550000	684520000	376850000	307660000	0	0	0	0	0	0	266030000	250870000	15158000	11905000	7759000	4145600
	1	1	1	1	0	0	0	0	0	0	1	0	44.862	382	NaN	NaN	NaN	NaN	NaN	NaN	NaN	NaN	0	0	0	0	0	0	0	0	0	0	0	0	0	0	0	0	0	0	0	0	0	0	0	0	0	0	0
LSM1	1	1	1	1	1	1	1	1	0	0	0	0	20.307	172	NaN	NaN	NaN	NaN	NaN	NaN	NaN	NaN	486530000	0	486530000	103230000	0	103230000	114810000	0	114810000	128910000	0	128910000	139580000	0	139580000	0	0	0	0	0	0	0	0	0	0	0	0
MTC1	1	9	9	9	7	5	2	4	0	0	1	0	53.477	478	0.99454	1.1143	NaN	1.2836	NaN	NaN	NaN	NaN	6025500000	3143600000	2881900000	2960900000	1586800000	1374100000	1461300000	838710000	622550000	5703500	3312800	2390700	1587000000	708010000	878970000	0	0	0	0	0	0	10651000	6794300	3856700	0	0	0
ALB1	1	8	8	8	5	2	3	3	0	0	0	0	19.287	175	0.81821	NaN	0.37189	0.51875	NaN	NaN	NaN	NaN	1706200000	1000700000	705530000	565910000	295260000	270650000	325470000	185140000	140330000	414420000	257980000	156440000	400440000	262330000	138110000	0	0	0	0	0	0	0	0	0	0	0	0
MDV1	1	4	4	4	2	3	2	3	0	0	0	0	80.031	714	0.49743	1.0407	0.93692	0.77814	NaN	NaN	NaN	NaN	896250000	604430000	291820000	116860000	81566000	35298000	352960000	268810000	84150000	227830000	131610000	96221000	198600000	122450000	76150000	0	0	0	0	0	0	0	0	0	0	0	0
GWT1	1	1	1	1	0	0	0	0	0	0	1	0	55.466	490	NaN	NaN	NaN	NaN	NaN	NaN	NaN	NaN	9625800	4374200	5251600	0	0	0	0	0	0	0	0	0	0	0	0	0	0	0	0	0	0	9625800	4374200	5251600	0	0	0
ALY2	1	2	2	2	1	1	1	1	1	0	0	0	117.21	1046	NaN	NaN	NaN	NaN	NaN	NaN	NaN	NaN	252460000	126540000	125910000	41384000	27788000	13595000	59058000	33031000	26026000	69375000	30355000	39020000	65571000	29086000	36485000	17070000	6282100	10787000	0	0	0	0	0	0	0	0	0
NET1	1	22	22	22	14	12	10	10	0	0	2	2	128.53	1189	1.0389	0.96401	0.99604	0.85988	NaN	NaN	1.0678	0.82527	9274000000	5170500000	4103500000	4701200000	2631400000	2069900000	1951900000	1033900000	918010000	1394700000	817390000	577350000	1183600000	664860000	518690000	0	0	0	0	0	0	22665000	11809000	10856000	19905000	11146000	8759000
SMC3	1	8	8	8	3	1	2	2	1	3	2	1	141.33	1230	0.81705	NaN	0.92199	0.92519	NaN	3.1647	1.0383	NaN	1069400000	464360000	605000000	242900000	137780000	105120000	124920000	72284000	52638000	177510000	116950000	60562000	165410000	88561000	76850000	77587000	437930	77149000	217220000	10882000	206330000	25847000	15516000	10332000	37969000	21956000	16014000
YHC3	1	1	1	1	0	0	0	0	1	1	1	0	46.383	408	NaN	NaN	NaN	NaN	NaN	NaN	NaN	NaN	0	0	0	0	0	0	0	0	0	0	0	0	0	0	0	0	0	0	0	0	0	0	0	0	0	0	0
IKS1	1	3	3	3	1	0	0	1	1	0	0	2	75.326	667	NaN	NaN	NaN	NaN	NaN	NaN	NaN	0.76049	138280000	91338000	46940000	21726000	12038000	9688100	0	0	0	0	0	0	17504000	13681000	3823300	29160000	19490000	9669400	0	0	0	0	0	0	69888000	46129000	23760000
	1	5	5	5	5	5	4	2	0	0	0	0	26.864	245	0.97187	1.0702	1.0146	1.1255	NaN	NaN	NaN	NaN	9051200000	5176400000	3874800000	2749500000	1492500000	1257000000	2245800000	1309600000	936200000	2360300000	1402300000	958010000	1695600000	971960000	723670000	0	0	0	0	0	0	0	0	0	0	0	0
	1	2	2	2	2	1	1	1	0	0	1	0	52.849	450	0.69942	NaN	NaN	1.2689	NaN	NaN	NaN	NaN	654140000	331730000	322410000	131680000	74216000	57468000	102880000	54058000	48817000	161560000	77689000	83871000	250970000	121900000	129070000	0	0	0	0	0	0	7051700	3867700	3184000	0	0	0
UBX6	1	1	1	1	0	0	0	0	0	0	1	1	45.016	396	NaN	NaN	NaN	NaN	NaN	NaN	NaN	NaN	26947000	11714000	15233000	0	0	0	0	0	0	0	0	0	0	0	0	0	0	0	0	0	0	16061000	6232800	9828700	10886000	5481700	5404100
AIM22	1	3	3	3	1	2	1	0	0	0	0	2	47.003	409	NaN	NaN	NaN	NaN	NaN	NaN	NaN	NaN	103170000	55797000	47374000	33896000	13487000	20410000	69274000	42310000	26964000	0	0	0	0	0	0	0	0	0	0	0	0	0	0	0	0	0	0
NUP192	1	9	9	9	1	1	1	3	1	5	3	0	191.53	1683	NaN	NaN	NaN	1.158	NaN	1.5716	1.0523	NaN	18468000000	275420000	18193000000	50310000	25018000	25291000	79195000	40173000	39022000	71683000	42065000	29618000	18163000000	119380000	18043000000	12651000	848100	11803000	68391000	34353000	34038000	23192000	13583000	9609200	0	0	0
APS3	1	2	2	2	1	1	1	1	0	0	0	2	21.938	194	NaN	NaN	NaN	NaN	NaN	NaN	NaN	NaN	194190000	112120000	82071000	56065000	31382000	24683000	52973000	30540000	22433000	65908000	38666000	27242000	0	0	0	0	0	0	0	0	0	0	0	0	19248000	11535000	7713100
RPC17	1	2	2	2	2	1	1	1	0	0	1	0	18.596	161	0.93487	1.055	0.97548	1.1312	NaN	NaN	NaN	NaN	1465300000	764500000	700790000	323990000	153090000	170910000	406420000	209980000	196430000	444080000	253450000	190630000	290800000	147980000	142820000	0	0	0	0	0	0	0	0	0	0	0	0
MPP10	1	15	15	15	11	12	12	10	1	0	0	1	66.952	593	0.88418	0.90652	0.9762	0.95551	NaN	NaN	NaN	NaN	10509000000	5944200000	4565300000	3171100000	1812300000	1358800000	2828200000	1604300000	1223900000	2364500000	1358700000	1005700000	2126900000	1154600000	972330000	9112400	9112400	0	0	0	0	0	0	0	9731500	5132800	4598700
	1	10	10	10	2	1	0	0	1	6	7	7	59.765	519	1.314	NaN	NaN	NaN	NaN	0.70383	0.92814	0.94518	2723900000	1583500000	1140400000	2289000000	1321500000	967570000	0	0	0	0	0	0	0	0	0	16546000	8745700	7800100	84079000	56671000	27407000	143150000	81571000	61576000	191110000	115070000	76042000
	1	1	1	1	0	0	0	0	0	0	0	1	30.473	261	NaN	NaN	NaN	NaN	NaN	NaN	NaN	NaN	5384600	2631900	2752700	0	0	0	0	0	0	0	0	0	0	0	0	0	0	0	0	0	0	0	0	0	5384600	2631900	2752700
TMA22	1	6	6	6	5	6	5	5	0	0	1	0	22.495	198	1.0347	0.92814	0.94122	1.0266	NaN	NaN	NaN	NaN	26676000000	9585800000	17090000000	5043500000	2174700000	2868800000	6350500000	2196600000	4153900000	7192600000	2587000000	4605600000	8061000000	2619100000	5441900000	0	0	0	0	0	0	27921000	8416800	19505000	0	0	0
LSM8	1	1	1	1	1	1	0	0	0	0	0	0	12.385	109	1.1252	NaN	NaN	NaN	NaN	NaN	NaN	NaN	254260000	154470000	99789000	216710000	133540000	83175000	37551000	20938000	16613000	0	0	0	0	0	0	0	0	0	0	0	0	0	0	0	0	0	0
MDE1	1	1	1	1	1	1	1	0	0	0	0	0	27.427	244	NaN	NaN	1.1565	NaN	NaN	NaN	NaN	NaN	813020000	415000000	398030000	204330000	125290000	79039000	158520000	88871000	69652000	450170000	200830000	249330000	0	0	0	0	0	0	0	0	0	0	0	0	0	0	0
BNA1	1	6	6	6	3	3	4	4	0	0	0	0	20.235	177	1.0414	1.1615	1.2176	1.1957	NaN	NaN	NaN	NaN	9094200000	4420200000	4674000000	1984900000	1120700000	864190000	2511400000	1142100000	1369300000	3056100000	1334200000	1722000000	1541700000	823170000	718570000	0	0	0	0	0	0	0	0	0	0	0	0
GEA1	1	2	2	2	2	0	0	0	0	0	0	0	159.44	1408	NaN	NaN	NaN	NaN	NaN	NaN	NaN	NaN	27478000	13527000	13952000	27478000	13527000	13952000	0	0	0	0	0	0	0	0	0	0	0	0	0	0	0	0	0	0	0	0	0
CPR7	1	4	4	4	4	0	0	1	0	0	0	0	45.133	393	0.9836	NaN	NaN	1.0966	NaN	NaN	NaN	NaN	308870000	170810000	138060000	219370000	118760000	100620000	0	0	0	0	0	0	89495000	52049000	37446000	0	0	0	0	0	0	0	0	0	0	0	0
POL32	1	1	1	1	1	1	1	0	0	0	0	0	40.309	350	1.0035	0.97143	1.1897	NaN	NaN	NaN	NaN	NaN	144570000	79087000	65487000	70642000	40078000	30564000	57775000	31246000	26529000	16156000	7762600	8393800	0	0	0	0	0	0	0	0	0	0	0	0	0	0	0
TAH11	1	4	4	4	2	1	1	1	1	0	1	2	68.404	604	0.78123	NaN	NaN	NaN	NaN	NaN	NaN	0.96132	648090000	296260000	351830000	151700000	80747000	70952000	145050000	41937000	103110000	191170000	71317000	119860000	118000000	78227000	39774000	808870	633750	175120	0	0	0	16036000	8835300	7200700	25326000	14563000	10764000
PTK2	1	7	7	7	4	1	1	2	1	1	1	1	91.399	818	1.0522	NaN	NaN	0.70622	NaN	NaN	NaN	NaN	1209800000	662620000	547140000	668560000	348650000	319900000	79721000	49407000	30314000	124500000	69404000	55096000	216870000	135180000	81696000	34079000	22341000	11737000	16482000	10002000	6480500	9889900	5598500	4291500	59658000	22040000	37618000
HAM1	1	5	5	5	4	3	4	3	0	0	1	1	22.093	197	1.1923	0.98888	0.89308	1.015	NaN	NaN	NaN	NaN	12926000000	6937800000	5988400000	3408900000	1856500000	1552400000	2694400000	1496800000	1197600000	4137000000	2218400000	1918600000	2655100000	1347400000	1307700000	0	0	0	0	0	0	16685000	10954000	5730400	14199000	7853100	6346100
LIA1	1	10	10	10	9	6	6	5	0	0	0	1	36.164	325	0.91671	0.89073	0.84757	0.92987	NaN	NaN	NaN	NaN	44579000000	26121000000	18459000000	13128000000	7610200000	5517900000	10885000000	6314100000	4570500000	12554000000	7423400000	5130700000	7948000000	4744900000	3203100000	0	0	0	0	0	0	0	0	0	64637000	28065000	36572000
NPA3	1	3	3	3	3	1	1	2	0	0	0	0	43.194	385	0.99567	0.80076	1.3424	1.1309	NaN	NaN	NaN	NaN	3303900000	1865600000	1438200000	1353500000	808590000	544940000	459190000	258670000	200520000	423290000	234450000	188840000	1067900000	563930000	503930000	0	0	0	0	0	0	0	0	0	0	0	0
BNA2	1	1	1	1	0	0	0	1	0	0	0	0	50.775	453	NaN	NaN	NaN	NaN	NaN	NaN	NaN	NaN	28577000	8810500	19767000	0	0	0	0	0	0	0	0	0	28577000	8810500	19767000	0	0	0	0	0	0	0	0	0	0	0	0
CSN12	1	1	1	1	1	0	0	0	0	0	0	0	49.482	423	NaN	NaN	NaN	NaN	NaN	NaN	NaN	NaN	9643800	4625000	5018800	9643800	4625000	5018800	0	0	0	0	0	0	0	0	0	0	0	0	0	0	0	0	0	0	0	0	0
	1	1	1	1	0	0	0	0	0	1	0	1	11.25	105	NaN	NaN	NaN	NaN	NaN	NaN	NaN	NaN	39861000	23025000	16836000	0	0	0	0	0	0	0	0	0	0	0	0	0	0	0	2650400	1294700	1355700	0	0	0	37211000	21731000	15481000
BUD4	1	10	10	10	6	4	6	1	1	1	0	1	164.48	1447	0.79964	NaN	1.0545	NaN	NaN	NaN	NaN	NaN	843360000	482200000	361160000	373860000	221190000	152670000	78866000	29465000	49402000	325050000	179890000	145170000	29144000	15218000	13926000	10634000	10634000	0	25804000	25804000	0	0	0	0	0	0	0
	1	3	3	3	1	1	1	2	0	0	0	0	32.344	282	NaN	NaN	NaN	NaN	NaN	NaN	NaN	NaN	144010000	75172000	68841000	0	0	0	38011000	22596000	15415000	49043000	25590000	23453000	56959000	26986000	29974000	0	0	0	0	0	0	0	0	0	0	0	0
AIM25	1	2	2	2	0	0	0	2	1	1	0	0	37.479	327	NaN	NaN	NaN	1.1696	NaN	NaN	NaN	NaN	65110000	33336000	31774000	0	0	0	0	0	0	0	0	0	60675000	30461000	30214000	2139800	1566700	573120	2295700	1308500	987150	0	0	0	0	0	0
	1	1	1	1	1	0	0	0	0	0	1	1	32.208	283	NaN	NaN	NaN	NaN	NaN	NaN	NaN	NaN	151590000	70341000	81253000	113780000	50056000	63723000	0	0	0	0	0	0	0	0	0	0	0	0	0	0	0	15650000	8433400	7216800	22166000	11852000	10313000
NNF1	1	2	2	2	1	1	0	0	0	0	0	0	23.639	201	NaN	NaN	NaN	NaN	NaN	NaN	NaN	NaN	119360000	53061000	66304000	105480000	43595000	61884000	13886000	9465800	4420100	0	0	0	0	0	0	0	0	0	0	0	0	0	0	0	0	0	0
IBA57	1	8	8	8	1	2	1	1	1	2	1	3	57.054	497	NaN	1.8096	NaN	NaN	NaN	0.68308	NaN	0.95894	1751000000	286410000	1464600000	1281600000	67522000	1214100000	240340000	83808000	156530000	101510000	45905000	55604000	21471000	16944000	4527600	2670300	2196900	473420	28175000	19933000	8242800	10577000	6926500	3650300	64602000	43178000	21423000
	1	3	3	3	0	0	0	0	2	3	3	2	49.663	448	NaN	NaN	NaN	NaN	NaN	0.86023	0.87853	0.95122	534930000	345800000	189130000	0	0	0	0	0	0	0	0	0	0	0	0	87802000	61502000	26300000	95884000	60705000	35178000	251630000	161130000	90503000	99614000	62464000	37150000
ENT3	1	6	6	6	4	2	4	3	0	0	0	1	45.091	408	1.0659	1.1436	1.0923	1.0018	NaN	NaN	NaN	NaN	2626300000	1366600000	1259700000	706300000	382620000	323680000	656060000	338350000	317710000	778420000	417910000	360510000	457390000	214350000	243030000	0	0	0	0	0	0	0	0	0	28115000	13332000	14783000
EFM3	1	2	2	2	2	1	1	0	0	0	0	0	39.023	339	0.23285	NaN	NaN	NaN	NaN	NaN	NaN	NaN	2881100000	2416800000	464290000	1989200000	1545200000	443940000	891900000	871550000	20351000	0	0	0	0	0	0	0	0	0	0	0	0	0	0	0	0	0	0
STR2	1	2	2	2	1	1	1	1	1	1	1	1	72.35	639	0.89214	NaN	NaN	NaN	NaN	NaN	NaN	NaN	539790000	302660000	237130000	124450000	71797000	52657000	66577000	32627000	33950000	89239000	46125000	43114000	79733000	37344000	42389000	19004000	10396000	8608000	91635000	53275000	38360000	45711000	27661000	18050000	23431000	23431000	0
XPT1	1	3	3	3	2	1	1	1	0	0	0	0	23.671	209	1.0475	NaN	NaN	NaN	NaN	NaN	NaN	NaN	554500000	297170000	257330000	502410000	269940000	232470000	9944600	4547200	5397500	36429000	20838000	15591000	5720200	1850800	3869400	0	0	0	0	0	0	0	0	0	0	0	0
SGM1	1	10	10	10	5	5	7	4	0	0	0	0	81.17	707	1.1675	0.9017	0.83075	1.0349	NaN	NaN	NaN	NaN	2330600000	1367900000	962690000	494310000	272180000	222130000	346640000	231530000	115110000	708190000	425910000	282280000	781490000	438310000	343170000	0	0	0	0	0	0	0	0	0	0	0	0
MET5	1	5	5	5	4	1	1	1	0	0	0	0	161.22	1442	1.037	0.39523	0.80866	0.85097	NaN	NaN	NaN	NaN	686810000	399270000	287540000	492720000	287200000	205520000	27572000	19741000	7830400	155480000	84528000	70956000	11032000	7799100	3233400	0	0	0	0	0	0	0	0	0	0	0	0
	1	2	2	2	1	2	1	0	1	1	1	1	39.69	342	NaN	NaN	NaN	NaN	NaN	NaN	NaN	NaN	295700000	161440000	134250000	0	0	0	107220000	51757000	55466000	121000000	69757000	51242000	0	0	0	10022000	8636100	1385900	9099900	6708500	2391500	29012000	13332000	15680000	19340000	11252000	8088100
BAT2	1	7	7	7	4	3	1	1	0	1	1	2	41.624	376	0.93383	1.6836	NaN	NaN	NaN	NaN	NaN	0.90204	1168600000	575980000	592580000	491580000	277040000	214540000	470460000	195380000	275080000	76831000	35938000	40893000	0	0	0	0	0	0	2683200	1399200	1283900	51663000	26886000	24778000	75334000	39338000	35996000
COS1;COS5;COS4	3	3	1	1	0	1	0	0	3	1	1	0	45.288	381	NaN	NaN	NaN	NaN	NaN	NaN	NaN	NaN	24435000	15598000	8837200	0	0	0	0	0	0	0	0	0	0	0	0	4464400	2985700	1478700	0	0	0	19971000	12612000	7358500	0	0	0
ALD2;ALD3	2	7	7	7	4	1	1	3	0	0	0	0	55.187	506	1.4697	NaN	NaN	NaN	NaN	NaN	NaN	NaN	377230000	182550000	194690000	325160000	164780000	160380000	0	0	0	0	0	0	52074000	17763000	34312000	0	0	0	0	0	0	0	0	0	0	0	0
SRB7	1	3	3	3	3	0	0	0	0	0	0	0	16.071	140	1.4512	NaN	NaN	NaN	NaN	NaN	NaN	NaN	66573000	47437000	19136000	66573000	47437000	19136000	0	0	0	0	0	0	0	0	0	0	0	0	0	0	0	0	0	0	0	0	0
ATH1	1	6	6	6	0	0	0	0	3	5	2	2	136.92	1211	NaN	NaN	NaN	NaN	NaN	1.3517	1.6403	1.006	163450000	87537000	75909000	0	0	0	0	0	0	0	0	0	0	0	0	0	0	0	68715000	37670000	31045000	39863000	18719000	21144000	54868000	31148000	23720000
ENP2	1	7	7	7	2	2	3	1	1	1	2	3	81.733	707	0.6875	0.92751	1.0248	NaN	NaN	NaN	1.0801	0.94162	1502600000	824230000	678330000	311100000	191250000	119850000	426960000	199610000	227350000	427980000	241810000	186170000	150060000	82433000	67629000	16413000	10306000	6106600	4758500	3058500	1700000	91642000	52854000	38788000	73651000	42909000	30742000
HGH1	1	8	8	8	3	3	2	3	0	0	4	4	44.951	394	1.0332	0.8679	0.91168	1.1577	NaN	NaN	0.79552	0.76227	1754200000	970990000	783240000	683920000	382760000	301160000	375770000	203980000	171790000	211140000	118660000	92487000	368580000	192950000	175630000	0	0	0	0	0	0	59163000	37851000	21311000	55640000	34787000	20854000
PAC10	1	3	3	3	3	3	3	3	0	0	0	0	23.115	199	0.95494	1.0277	1.0234	1.0892	NaN	NaN	NaN	NaN	9433200000	5443900000	3989300000	2344000000	1351100000	992850000	2396800000	1307900000	1088900000	2556900000	1323800000	1233100000	2135500000	1461100000	674410000	0	0	0	0	0	0	0	0	0	0	0	0
UPF3	1	3	3	3	3	1	0	1	0	0	0	0	44.924	387	0.9032	1.0884	NaN	NaN	NaN	NaN	NaN	NaN	337240000	196830000	140410000	210130000	126790000	83335000	65724000	34837000	30888000	0	0	0	61394000	35204000	26191000	0	0	0	0	0	0	0	0	0	0	0	0
BPL1	1	3	3	3	1	1	0	0	0	0	1	0	76.362	690	NaN	NaN	NaN	NaN	NaN	NaN	NaN	NaN	193320000	111620000	81710000	45948000	27085000	18864000	106060000	58710000	47345000	0	0	0	0	0	0	0	0	0	0	0	0	41321000	25820000	15501000	0	0	0
DSK2	1	5	5	5	5	4	4	3	0	0	0	0	39.345	373	1.0117	1.0739	1.0865	1.2613	NaN	NaN	NaN	NaN	17717000000	9349100000	8368000000	8877000000	4908000000	3969000000	4264300000	2148900000	2115500000	3042800000	1562800000	1480000000	1532900000	729370000	803530000	0	0	0	0	0	0	0	0	0	0	0	0
MSE1	1	6	6	6	0	0	0	0	0	3	4	2	61.603	536	NaN	NaN	NaN	NaN	NaN	1.094	1.2114	NaN	243140000	137570000	105570000	0	0	0	0	0	0	0	0	0	0	0	0	0	0	0	114620000	74544000	40079000	109000000	52278000	56724000	19515000	10751000	8763800
ISM1	1	7	7	7	2	1	1	0	0	3	3	2	115.79	1002	0.75748	NaN	NaN	NaN	NaN	0.85816	0.73192	1.0408	370920000	240060000	130860000	83374000	55739000	27634000	45083000	31242000	13841000	0	0	0	0	0	0	0	0	0	33778000	18657000	15121000	107650000	73673000	33973000	101040000	60746000	40294000
BXI1	1	2	2	2	1	1	1	1	1	2	1	2	33.645	297	NaN	NaN	NaN	1.0931	NaN	0.83396	NaN	1.2888	790910000	431800000	359100000	131940000	67971000	63968000	75503000	41396000	34107000	42432000	31230000	11202000	41626000	16573000	25053000	4211600	3075000	1136500	88137000	59243000	28894000	145750000	89119000	56634000	261300000	123200000	138110000
YPT11	1	2	2	2	0	0	0	0	1	1	2	2	47.115	417	NaN	NaN	NaN	NaN	NaN	NaN	1.107	1.136	170010000	96536000	73476000	0	0	0	0	0	0	0	0	0	0	0	0	15602000	10300000	5301900	5004300	2985900	2018400	74107000	44573000	29533000	75299000	38677000	36622000
CLA4	1	7	7	7	1	1	0	1	1	0	3	3	93.908	842	NaN	NaN	NaN	NaN	NaN	NaN	0.93709	1.1565	310430000	168910000	141520000	111030000	72369000	38661000	71664000	28404000	43260000	0	0	0	51426000	27784000	23642000	1005400	744370	261070	0	0	0	25404000	15152000	10251000	49903000	24456000	25447000
PUS4	1	8	8	8	5	4	4	3	1	0	0	2	45.273	403	0.96801	0.86088	1.0404	0.77072	NaN	NaN	NaN	1.0974	4252000000	2241000000	2011000000	2007000000	1124400000	882600000	884900000	465580000	419330000	1027200000	456270000	570880000	225610000	130290000	95312000	8619200	8619200	0	0	0	0	0	0	0	98674000	55775000	42900000
LYS20	1	12	7	7	3	4	3	1	1	1	4	4	47.098	428	0.6645	0.80174	0.8492	1.0171	NaN	NaN	2.296	NaN	4692400000	3109100000	1583300000	2012000000	1497200000	514790000	1176600000	779530000	397100000	846760000	525140000	321620000	335740000	168370000	167370000	9892400	5828700	4063700	15208000	10528000	4679600	275350000	117760000	157590000	20828000	4750000	16078000
BRO1	1	9	9	9	2	4	2	4	0	0	1	1	97.275	844	1.2432	0.90819	1.0533	1.0813	NaN	NaN	NaN	NaN	1689500000	859120000	830380000	280340000	116610000	163740000	580210000	305140000	275070000	369460000	204930000	164530000	435310000	219660000	215660000	0	0	0	0	0	0	10060000	5557800	4501900	14118000	7232300	6885500
RBL2	1	4	4	4	4	4	4	4	0	0	0	0	12.379	106	1.0204	1.0586	1.0229	1.0952	NaN	NaN	NaN	NaN	9067900000	4765600000	4302300000	4775100000	2481900000	2293100000	2188700000	1181500000	1007200000	1214400000	649260000	565150000	889700000	452920000	436780000	0	0	0	0	0	0	0	0	0	0	0	0
APT1	1	5	5	5	5	4	4	4	1	2	1	2	20.587	187	0.97599	1.0051	0.94573	0.98042	NaN	0.33407	NaN	0.83393	12166000000	6863300000	5302500000	3663600000	2037600000	1626000000	2790000000	1554900000	1235100000	3018700000	1727400000	1291300000	2561900000	1454400000	1107400000	39025000	29159000	9865500	27608000	19483000	8125100	20836000	14804000	6031500	44218000	25531000	18687000
NUP42	1	4	4	4	1	0	0	2	0	0	2	0	42.778	430	NaN	NaN	NaN	1.6813	NaN	NaN	NaN	NaN	109790000	53250000	56537000	24314000	12628000	11686000	0	0	0	0	0	0	79251000	37077000	42174000	0	0	0	0	0	0	6222100	3544800	2677300	0	0	0
PRP31	1	2	2	2	1	2	1	1	0	0	0	0	56.302	494	0.88068	1.2535	NaN	1.0005	NaN	NaN	NaN	NaN	8659700000	4852200000	3807500000	1978400000	1152000000	826470000	1978300000	1082500000	895760000	2036300000	1141900000	894390000	2666700000	1475800000	1190900000	0	0	0	0	0	0	0	0	0	0	0	0
HNT2	1	2	2	2	1	1	1	1	0	0	1	1	23.541	206	NaN	NaN	NaN	NaN	NaN	NaN	NaN	NaN	505740000	264270000	241470000	116450000	76667000	39784000	144450000	73204000	71244000	138590000	68591000	69998000	106250000	45808000	60444000	0	0	0	0	0	0	0	0	0	0	0	0
NIT3	1	9	9	9	1	0	0	0	1	5	3	7	32.549	291	NaN	NaN	NaN	NaN	NaN	0.90606	0.85858	0.9299	669540000	396910000	272630000	0	0	0	0	0	0	0	0	0	0	0	0	23221000	12218000	11003000	181070000	110690000	70377000	108640000	62839000	45798000	356620000	211160000	145450000
HSH155	1	2	2	2	2	1	1	0	0	0	0	0	110.03	971	1.1703	NaN	NaN	NaN	NaN	NaN	NaN	NaN	402060000	225790000	176270000	261690000	146930000	114760000	65193000	35107000	30086000	75182000	43752000	31430000	0	0	0	0	0	0	0	0	0	0	0	0	0	0	0
HSV2	1	2	2	2	0	0	0	0	0	1	0	2	51.235	448	NaN	NaN	NaN	NaN	NaN	NaN	NaN	NaN	32668000	20350000	12317000	0	0	0	0	0	0	0	0	0	0	0	0	0	0	0	9616700	5652600	3964100	0	0	0	23051000	14698000	8353000
NAS6	1	5	5	5	3	4	2	3	0	0	0	0	25.616	228	0.67046	0.75332	0.96137	1.0771	NaN	NaN	NaN	NaN	4606000000	3115500000	1490500000	1995500000	1562600000	432880000	1350900000	1056500000	294410000	378370000	220950000	157420000	881250000	275440000	605810000	0	0	0	0	0	0	0	0	0	0	0	0
	1	1	1	1	1	0	0	0	1	0	1	0	89.24	785	NaN	NaN	NaN	NaN	NaN	NaN	NaN	NaN	233690000	120860000	112830000	136220000	61972000	74251000	0	0	0	0	0	0	0	0	0	15279000	12793000	2485900	0	0	0	82188000	46094000	36094000	0	0	0
UBP15	1	8	8	8	6	1	2	0	2	2	1	2	143.56	1230	0.98865	NaN	NaN	NaN	NaN	0.89561	NaN	1.0406	492360000	291290000	201070000	423480000	253400000	170080000	0	0	0	49820000	29482000	20338000	0	0	0	4172700	0	4172700	1634800	939290	695470	3032200	1904000	1128300	10221000	5569100	4651900
TAF4	1	2	2	2	2	2	2	1	0	0	0	0	42.336	388	0.89817	0.88487	1.037	NaN	NaN	NaN	NaN	NaN	1730900000	1024500000	706380000	502320000	275210000	227110000	584410000	355540000	228870000	447050000	264720000	182330000	197100000	129040000	68057000	0	0	0	0	0	0	0	0	0	0	0	0
RPA14	1	5	5	5	2	3	3	2	0	0	0	0	14.585	137	0.82902	0.82473	0.73756	0.68168	NaN	NaN	NaN	NaN	1837400000	1162100000	675380000	552830000	344240000	208590000	508780000	324690000	184100000	450310000	283450000	166860000	325500000	209670000	115830000	0	0	0	0	0	0	0	0	0	0	0	0
GLO1	1	3	3	3	2	0	0	2	1	1	1	1	37.208	326	NaN	NaN	NaN	NaN	NaN	NaN	NaN	NaN	250930000	129280000	121640000	128820000	73173000	55647000	0	0	0	0	0	0	119570000	54362000	65209000	0	0	0	0	0	0	2534900	1747200	787750	0	0	0
PSP2	1	6	6	6	5	2	4	3	1	1	1	0	65.583	593	0.86431	0.64045	0.77193	1.0991	NaN	NaN	NaN	NaN	2107300000	1320100000	787170000	983190000	653230000	329960000	315970000	206420000	109550000	348600000	205630000	142970000	402490000	218610000	183880000	14038000	8283100	5755200	12889000	8374000	4515100	30107000	19569000	10538000	0	0	0
SAM37	1	2	2	2	1	1	0	0	1	1	1	1	37.492	327	NaN	NaN	NaN	NaN	NaN	NaN	NaN	NaN	411830000	231440000	180380000	176270000	104470000	71801000	126660000	65274000	61383000	0	0	0	0	0	0	0	0	0	35710000	17595000	18114000	34700000	21071000	13629000	38489000	23034000	15455000
SOL1	1	3	3	3	2	1	1	0	0	0	1	0	35.652	321	1.0729	0.95185	NaN	NaN	NaN	NaN	NaN	NaN	422240000	233510000	188720000	255300000	134940000	120370000	161960000	95585000	66380000	0	0	0	0	0	0	0	0	0	0	0	0	4968400	2989300	1979100	0	0	0
UBC9	1	6	6	6	2	2	2	2	0	3	3	4	17.911	157	0.98552	0.93396	0.98555	0.94016	NaN	0.84738	0.89593	0.83274	2867600000	1706500000	1161100000	801390000	466720000	334660000	604640000	346840000	257800000	497110000	287310000	209800000	565950000	355360000	210600000	0	0	0	76762000	53791000	22971000	201720000	126960000	74760000	120050000	69513000	50533000
RIB4	1	4	4	4	1	1	1	1	1	1	3	3	18.555	169	0.95583	1.0879	1.2525	1.123	NaN	NaN	1.1456	0.9781	14395000000	7743600000	6651300000	2858300000	1665900000	1192400000	3860700000	2085200000	1775500000	3935500000	2008100000	1927400000	3583100000	1896800000	1686300000	11815000	7082500	4732400	10955000	6057700	4897500	104030000	58446000	45588000	30474000	16058000	14416000
PSP1	1	2	2	2	2	0	0	0	0	0	0	0	95.346	841	1.2083	NaN	NaN	NaN	NaN	NaN	NaN	NaN	236420000	96494000	139920000	236420000	96494000	139920000	0	0	0	0	0	0	0	0	0	0	0	0	0	0	0	0	0	0	0	0	0
INP52	1	1	1	1	1	1	0	0	0	0	0	0	133.33	1183	NaN	NaN	NaN	NaN	NaN	NaN	NaN	NaN	40071000	24898000	15173000	26258000	17561000	8696900	13813000	7336800	6476300	0	0	0	0	0	0	0	0	0	0	0	0	0	0	0	0	0	0
MIC27	1	5	5	5	2	1	1	1	1	2	3	4	26.959	234	0.92547	NaN	NaN	NaN	NaN	1.0368	0.94186	0.85753	682130000	387190000	294940000	166270000	92321000	73953000	69516000	44928000	24587000	63981000	30680000	33301000	70548000	34196000	36352000	11758000	7725200	4032500	29314000	17609000	11704000	88898000	53857000	35040000	181840000	105870000	75971000
OCA1	1	1	1	1	1	1	1	0	0	0	0	0	27.205	238	NaN	NaN	NaN	NaN	NaN	NaN	NaN	NaN	0	0	0	0	0	0	0	0	0	0	0	0	0	0	0	0	0	0	0	0	0	0	0	0	0	0	0
PHO23	1	2	2	2	1	0	2	0	0	0	0	0	37.024	330	NaN	NaN	0.97875	NaN	NaN	NaN	NaN	NaN	150020000	80947000	69073000	34859000	18300000	16559000	0	0	0	115160000	62647000	52514000	0	0	0	0	0	0	0	0	0	0	0	0	0	0	0
RPL9B	1	13	3	3	10	7	6	7	11	10	10	10	21.657	191	1.0419	NaN	NaN	NaN	NaN	NaN	1.1829	NaN	1449700000	815440000	634270000	1312500000	741450000	571090000	4183900	1231400	2952500	8505100	3890600	4614500	8405300	4422200	3983000	20850000	11748000	9101600	20298000	10295000	10003000	45570000	25586000	19984000	29356000	16812000	12543000
RPL37B	1	6	2	2	1	0	0	2	3	2	4	4	9.8682	88	NaN	NaN	NaN	NaN	NaN	NaN	NaN	NaN	263940000	161830000	102110000	0	0	0	0	0	0	0	0	0	46976000	27279000	19697000	102140000	66870000	35268000	14160000	8877800	5282600	55727000	33693000	22034000	44942000	25109000	19832000
SHE4	1	3	3	3	2	0	0	1	0	0	0	0	89.552	789	NaN	NaN	NaN	NaN	NaN	NaN	NaN	NaN	71139000	36672000	34468000	50789000	29355000	21434000	0	0	0	0	0	0	20350000	7316900	13033000	0	0	0	0	0	0	0	0	0	0	0	0
SKP1	1	6	6	6	5	3	1	1	0	0	0	1	22.33	194	1.0272	1.1302	1.0156	NaN	NaN	NaN	NaN	NaN	2255800000	1209800000	1046000000	731320000	418070000	313260000	357480000	169550000	187930000	924100000	511220000	412880000	236720000	106330000	130390000	0	0	0	0	0	0	0	0	0	6144800	4641700	1503200
UBA2	1	3	3	3	1	3	2	3	0	0	0	0	71.258	636	0.9393	0.87618	0.99231	0.81514	NaN	NaN	NaN	NaN	1369200000	764250000	604970000	269790000	137440000	132350000	293230000	174760000	118470000	383010000	212360000	170650000	423190000	239680000	183510000	0	0	0	0	0	0	0	0	0	0	0	0
PYK2	1	1	1	1	1	1	1	1	0	0	0	0	55.195	506	NaN	1.1496	1.6557	1.7202	NaN	NaN	NaN	NaN	5040000000	2373800000	2666100000	586340000	295500000	290840000	1817500000	860940000	956560000	1262200000	594880000	667370000	1373900000	622490000	751380000	0	0	0	0	0	0	0	0	0	0	0	0
YKE2	1	4	4	4	4	4	4	4	0	0	0	0	13.284	114	1.0829	1.0284	1.0502	1.1117	NaN	NaN	NaN	NaN	27749000000	15429000000	12321000000	6184100000	3473100000	2711000000	9239400000	5395500000	3843900000	6966000000	3728800000	3237200000	5360100000	2831200000	2528900000	0	0	0	0	0	0	0	0	0	0	0	0
NUP84	1	8	8	8	3	1	1	0	0	5	4	1	83.634	726	0.87956	NaN	NaN	NaN	NaN	1.2383	1.3554	1.1593	1190600000	695990000	494650000	800820000	472170000	328650000	97106000	57969000	39138000	61508000	39871000	21637000	0	0	0	0	0	0	52588000	30284000	22303000	142920000	78100000	64819000	35691000	17592000	18099000
VPS4	1	3	3	3	2	2	2	2	0	0	0	1	48.172	437	NaN	1.165	1.1424	1.2247	NaN	NaN	NaN	NaN	2479200000	1304800000	1174500000	216840000	131290000	85557000	755900000	395860000	360030000	778730000	404030000	374710000	727760000	373600000	354160000	0	0	0	0	0	0	0	0	0	0	0	0
MSN5	1	2	2	2	2	2	2	1	0	0	0	0	142.12	1224	1.1046	0.9785	1.1493	1.0681	NaN	NaN	NaN	NaN	231310000	125180000	106130000	85883000	46327000	39555000	55211000	29379000	25832000	44072000	22791000	21281000	46139000	26679000	19460000	0	0	0	0	0	0	0	0	0	0	0	0
NBP35	1	2	2	2	2	1	1	0	0	0	0	0	35.253	328	0.86027	1.3059	1.4944	NaN	NaN	NaN	NaN	NaN	1483300000	718840000	764470000	423630000	206230000	217410000	784380000	392870000	391510000	275290000	119740000	155550000	0	0	0	0	0	0	0	0	0	0	0	0	0	0	0
PAN2	1	2	2	2	0	2	2	2	0	0	0	0	127.04	1115	NaN	1.0383	1.4529	1.2515	NaN	NaN	NaN	NaN	342640000	171290000	171350000	0	0	0	105660000	57547000	48109000	119500000	52671000	66828000	117480000	61068000	56414000	0	0	0	0	0	0	0	0	0	0	0	0
TAF6	1	4	4	4	1	1	2	1	0	0	0	2	57.901	516	0.99227	0.99484	1.0861	1.1385	NaN	NaN	NaN	NaN	3719800000	2000000000	1719800000	887460000	505310000	382150000	1094900000	601860000	493000000	1028400000	516450000	511930000	657650000	355180000	302460000	0	0	0	0	0	0	0	0	0	51440000	21176000	30264000
PPT1	1	6	6	6	6	3	4	2	0	0	0	0	57.994	513	0.93488	0.97811	0.96541	0.92488	NaN	NaN	NaN	NaN	2362800000	1292500000	1070300000	613760000	362080000	251670000	692130000	364210000	327920000	684300000	371190000	313110000	372620000	194990000	177630000	0	0	0	0	0	0	0	0	0	0	0	0
UFD1	1	2	2	2	0	1	1	1	0	0	1	0	39.81	361	NaN	1.1697	1.1295	1.0836	NaN	NaN	NaN	NaN	1223700000	612750000	610940000	0	0	0	420620000	200040000	220570000	381460000	201060000	180410000	415440000	207800000	207640000	0	0	0	0	0	0	6173400	3849800	2323600	0	0	0
MNT2	1	2	2	2	0	0	0	0	1	1	1	1	64.852	558	NaN	NaN	NaN	NaN	NaN	NaN	1.1955	NaN	86012000	38693000	47319000	0	0	0	0	0	0	0	0	0	0	0	0	2704600	1858400	846210	8235600	4459100	3776500	56443000	25014000	31429000	18629000	7361400	11267000
RAI1	1	1	1	1	1	1	1	1	0	0	0	0	44.509	387	NaN	NaN	NaN	NaN	NaN	NaN	NaN	NaN	2980700000	50802000	2929900000	0	0	0	0	0	0	2980700000	50802000	2929900000	0	0	0	0	0	0	0	0	0	0	0	0	0	0	0
RTF1	1	8	8	8	3	4	3	5	0	0	0	0	65.868	558	0.87906	0.98992	1.2494	1.2221	NaN	NaN	NaN	NaN	2292400000	1197700000	1094700000	379690000	227820000	151880000	773930000	440410000	333520000	337080000	189360000	147720000	801720000	340160000	461560000	0	0	0	0	0	0	0	0	0	0	0	0
TAD1	1	2	2	2	0	2	1	0	0	0	0	0	45.946	400	NaN	0.89993	NaN	NaN	NaN	NaN	NaN	NaN	304770000	153580000	151190000	0	0	0	206510000	113810000	92697000	98263000	39775000	58488000	0	0	0	0	0	0	0	0	0	0	0	0	0	0	0
	1	3	3	3	3	3	3	2	0	0	0	0	20.073	181	1.1132	1.152	1.1677	1.1696	NaN	NaN	NaN	NaN	7321900000	3692800000	3629000000	2287300000	1284600000	1002700000	1345400000	600000000	745370000	2948500000	1444200000	1504300000	740700000	364040000	376660000	0	0	0	0	0	0	0	0	0	0	0	0
KAP114	1	3	3	3	3	1	1	1	0	0	0	0	113.92	1004	0.97091	NaN	NaN	NaN	NaN	NaN	NaN	NaN	720310000	387210000	333110000	374570000	203450000	171130000	109390000	60200000	49189000	129020000	73411000	55609000	107330000	50147000	57181000	0	0	0	0	0	0	0	0	0	0	0	0
MTO1	1	7	7	7	1	1	1	0	1	1	3	3	74.215	669	NaN	NaN	NaN	NaN	NaN	NaN	1.0844	1.0578	223620000	129680000	93939000	48098000	19905000	28193000	33139000	22825000	10314000	35872000	24942000	10930000	0	0	0	17192000	6806400	10385000	2877100	1891800	985270	35387000	24063000	11324000	51056000	29249000	21807000
TAN1	1	5	5	5	4	4	3	2	0	0	1	0	33.55	289	0.97779	0.96805	0.94848	0.94037	NaN	NaN	NaN	NaN	2782200000	1543300000	1238900000	1159300000	677310000	482010000	787290000	412770000	374520000	386450000	203610000	182840000	449130000	249650000	199480000	0	0	0	0	0	0	0	0	0	0	0	0
VID30	1	5	5	5	2	0	0	2	0	0	0	1	108.18	958	NaN	NaN	NaN	1.1409	NaN	NaN	NaN	NaN	429020000	201760000	227260000	223170000	129870000	93299000	0	0	0	0	0	0	93723000	47343000	46380000	0	0	0	0	0	0	0	0	0	112120000	24543000	87580000
MTC3	1	2	2	2	0	0	0	0	0	0	2	1	14.488	123	NaN	NaN	NaN	NaN	NaN	NaN	1.0408	NaN	84837000	52266000	32571000	0	0	0	0	0	0	0	0	0	0	0	0	0	0	0	0	0	0	59442000	39103000	20338000	25395000	13163000	12233000
SDT1	1	4	4	4	3	2	2	3	0	0	0	0	31.968	280	0.9238	0.76211	0.59348	0.53403	NaN	NaN	NaN	NaN	1318600000	837770000	480850000	352740000	221130000	131610000	268160000	156840000	111320000	297880000	205770000	92116000	399840000	254040000	145800000	0	0	0	0	0	0	0	0	0	0	0	0
COG1	1	4	4	4	2	3	1	0	0	0	0	0	48.336	417	0.91985	1.1091	NaN	NaN	NaN	NaN	NaN	NaN	882970000	334190000	548770000	319620000	178700000	140920000	464710000	120260000	344450000	98642000	35232000	63409000	0	0	0	0	0	0	0	0	0	0	0	0	0	0	0
FRA2	1	3	3	3	3	3	2	2	1	0	0	0	14.102	120	1.0178	0.88933	0.95744	0.94379	NaN	NaN	NaN	NaN	5612100000	3122200000	2489800000	2543900000	1393200000	1150700000	1737300000	972360000	764950000	779650000	451610000	328040000	546530000	302340000	244190000	4713300	2730100	1983100	0	0	0	0	0	0	0	0	0
NCS6	1	3	3	3	1	0	2	2	0	0	0	0	39.987	359	NaN	NaN	NaN	0.81736	NaN	NaN	NaN	NaN	198820000	113090000	85723000	0	0	0	0	0	0	53364000	35898000	17466000	145450000	77196000	68258000	0	0	0	0	0	0	0	0	0	0	0	0
MDS3	1	5	5	5	3	1	1	1	0	0	0	0	166.97	1487	NaN	NaN	NaN	NaN	NaN	NaN	NaN	NaN	275960000	125660000	150300000	90983000	45268000	45714000	49105000	30918000	18187000	77027000	16492000	60535000	58844000	32976000	25867000	0	0	0	0	0	0	0	0	0	0	0	0
DSD1	1	4	4	4	1	3	2	2	0	0	0	0	47.827	428	NaN	NaN	1.0337	1.3649	NaN	NaN	NaN	NaN	508170000	266400000	241770000	114140000	68790000	45346000	76483000	28702000	47781000	195080000	102510000	92569000	122470000	66396000	56077000	0	0	0	0	0	0	0	0	0	0	0	0
TPN1	1	1	1	1	0	1	0	0	1	0	1	1	64.546	579	NaN	NaN	NaN	NaN	NaN	NaN	0.83281	NaN	90892000	60169000	30723000	0	0	0	21371000	13500000	7870600	0	0	0	0	0	0	7993000	3121500	4871500	0	0	0	48536000	35976000	12560000	12992000	7571800	5420700
AIM14	1	4	4	4	3	0	1	1	0	0	1	0	65.839	570	0.96642	NaN	NaN	0.85996	NaN	NaN	NaN	NaN	679590000	376000000	303590000	275160000	155470000	119690000	0	0	0	176370000	88390000	87975000	225590000	131610000	93980000	0	0	0	0	0	0	2477100	537350	1939700	0	0	0
ARI1	1	8	8	7	7	4	6	4	0	0	1	0	38.083	347	1.0599	1.1323	1.2102	1.1968	NaN	NaN	NaN	NaN	5505700000	2895100000	2610600000	2203600000	1252000000	951620000	895780000	423230000	472550000	1194100000	609220000	584870000	1142400000	566590000	575800000	0	0	0	0	0	0	69903000	44113000	25790000	0	0	0
NUT1	1	5	5	5	1	3	2	2	0	0	0	0	128.79	1132	NaN	2.3799	NaN	0.89199	NaN	NaN	NaN	NaN	336420000	99182000	237230000	0	0	0	235670000	43061000	192610000	0	0	0	100750000	56121000	44626000	0	0	0	0	0	0	0	0	0	0	0	0
INO80	1	10	10	10	5	5	5	5	0	2	0	0	171.45	1489	1.0674	1.3305	0.92749	0.87162	NaN	2.1186	NaN	NaN	1410000000	688230000	721780000	271850000	118060000	153800000	384900000	187250000	197650000	412230000	218310000	193920000	321480000	156490000	164990000	0	0	0	19560000	8129700	11430000	0	0	0	0	0	0
FLC3	1	1	1	1	0	1	0	0	1	1	1	1	90.76	802	NaN	NaN	NaN	NaN	NaN	NaN	NaN	NaN	142330000	87392000	54935000	0	0	0	76015000	41834000	34181000	0	0	0	0	0	0	13822000	9334700	4487800	5759900	4474100	1285800	26568000	18865000	7702800	20162000	12884000	7278100
MET13	1	1	1	1	1	1	1	1	0	0	0	0	68.559	600	1.104	1.2064	NaN	NaN	NaN	NaN	NaN	NaN	402640000	210960000	191670000	331470000	178830000	152640000	60666000	28453000	32213000	5041700	1605000	3436700	5454300	2075800	3378400	0	0	0	0	0	0	0	0	0	0	0	0
NSA1	1	8	8	8	4	3	4	2	1	0	1	2	51.906	463	0.80113	0.83386	0.79362	NaN	NaN	NaN	NaN	0.8842	1817400000	1192100000	625330000	950010000	704340000	245670000	278060000	161820000	116240000	455580000	248380000	207200000	88314000	47721000	40593000	1146500	710160	436300	0	0	0	8754800	5773900	2980900	35529000	23315000	12214000
CUE3	1	4	4	4	2	3	1	2	1	1	1	1	72.042	624	0.92699	0.88307	NaN	1.2713	NaN	NaN	NaN	NaN	1197900000	684370000	513510000	125970000	70861000	55108000	777450000	450150000	327300000	89005000	49277000	39727000	96723000	44358000	52365000	0	0	0	17626000	10621000	7005500	46646000	31521000	15124000	44457000	27578000	16879000
	1	4	4	4	1	1	2	1	1	1	3	1	16.037	140	NaN	1.1109	0.87623	NaN	NaN	NaN	NaN	NaN	486830000	271220000	215610000	80219000	43474000	36745000	118370000	56318000	62056000	115360000	70913000	44452000	82772000	42857000	39915000	9111900	7029600	2082400	6799200	5775500	1023700	31816000	20229000	11587000	42372000	24622000	17751000
MLC1	1	9	9	9	8	4	3	2	1	0	0	0	16.444	149	0.96568	1.1603	1.0895	1.0597	NaN	NaN	NaN	NaN	15708000000	8344300000	7363600000	5412800000	3011000000	2401700000	3023700000	1568700000	1455000000	3891100000	1992900000	1898200000	3328900000	1736600000	1592300000	51479000	35083000	16396000	0	0	0	0	0	0	0	0	0
YGL101W	1	1	1	1	0	1	1	1	0	0	0	0	25.297	215	NaN	NaN	NaN	1.0575	NaN	NaN	NaN	NaN	554130000	276430000	277700000	0	0	0	108460000	45607000	62854000	137340000	58376000	78959000	308340000	172450000	135890000	0	0	0	0	0	0	0	0	0	0	0	0
MMS2	1	2	2	2	1	1	1	1	0	0	0	1	15.544	137	NaN	NaN	NaN	1.1962	NaN	NaN	NaN	NaN	532340000	298270000	234070000	188380000	102450000	85932000	151490000	87738000	63751000	92182000	55453000	36728000	100290000	52626000	47663000	0	0	0	0	0	0	0	0	0	0	0	0
GUP1	1	1	1	1	0	0	0	0	1	0	1	1	65.339	560	NaN	NaN	NaN	NaN	NaN	NaN	NaN	NaN	408180000	274440000	133740000	0	0	0	0	0	0	0	0	0	0	0	0	24455000	18245000	6210400	0	0	0	222500000	151690000	70815000	161230000	104510000	56719000
NPY1	1	2	2	2	0	0	0	0	1	0	2	2	43.516	384	NaN	NaN	NaN	NaN	NaN	NaN	0.74887	0.78258	32885000	21901000	10984000	0	0	0	0	0	0	0	0	0	0	0	0	1472600	1309900	162660	0	0	0	17902000	11692000	6209700	13510000	8898900	4611300
SGF73	1	3	3	3	0	2	0	2	0	0	0	0	72.877	657	NaN	0.86561	NaN	0.85483	NaN	NaN	NaN	NaN	477480000	275350000	202130000	0	0	0	209430000	122420000	87008000	0	0	0	268050000	152920000	115120000	0	0	0	0	0	0	0	0	0	0	0	0
GEP7	1	3	3	3	1	1	1	0	0	2	1	1	32.959	287	NaN	NaN	NaN	NaN	NaN	1.258	NaN	NaN	707530000	417870000	289660000	139680000	88003000	51673000	260790000	146880000	113910000	265580000	156270000	109310000	0	0	0	0	0	0	8179800	4103400	4076400	22617000	15139000	7478000	10689000	7480000	3208800
SDS23	1	2	2	2	1	0	0	0	0	0	1	0	58.097	527	NaN	NaN	NaN	NaN	NaN	NaN	NaN	NaN	145290000	81958000	63329000	140940000	78714000	62223000	0	0	0	0	0	0	0	0	0	0	0	0	0	0	0	4349500	3243200	1106200	0	0	0
ERV14	1	1	1	1	0	0	0	0	1	1	1	1	15.93	138	NaN	NaN	NaN	NaN	NaN	NaN	1.1376	NaN	169980000	104260000	65721000	0	0	0	0	0	0	0	0	0	0	0	0	3089900	2466400	623570	35834000	23371000	12463000	89748000	53067000	36681000	41305000	25351000	15953000
TYW3	1	2	2	2	1	0	0	1	0	0	0	0	30.806	273	0.90688	NaN	NaN	NaN	NaN	NaN	NaN	NaN	667420000	301220000	366200000	455860000	265910000	189950000	0	0	0	0	0	0	211560000	35311000	176250000	0	0	0	0	0	0	0	0	0	0	0	0
ALG13	1	4	4	4	0	0	0	0	2	2	4	1	22.661	202	NaN	NaN	NaN	NaN	NaN	1.0761	0.81949	NaN	229590000	138900000	90692000	0	0	0	0	0	0	0	0	0	0	0	0	18373000	11201000	7172400	22961000	12270000	10691000	127730000	84051000	43680000	60527000	31379000	29148000
YGL039W	1	4	3	3	1	0	2	1	1	0	1	0	38.259	348	NaN	NaN	NaN	NaN	NaN	NaN	NaN	NaN	218000000	108940000	109070000	0	0	0	0	0	0	90531000	44989000	45542000	111720000	55595000	56128000	5911500	3164200	2747300	0	0	0	9838000	5187800	4650200	0	0	0
SCW11	1	4	4	4	3	2	1	1	0	0	1	1	56.446	542	NaN	0.6566	NaN	0.7505	NaN	NaN	NaN	NaN	593040000	345750000	247290000	121590000	65940000	55655000	148140000	83433000	64707000	129750000	75713000	54032000	193560000	120670000	72892000	0	0	0	0	0	0	0	0	0	0	0	0
COG7	1	4	4	4	3	4	2	1	0	0	0	0	31.775	279	0.95713	1.1614	0.9565	NaN	NaN	NaN	NaN	NaN	1327500000	682240000	645270000	581210000	315980000	265220000	543960000	248320000	295640000	145310000	84096000	61212000	57034000	33841000	23193000	0	0	0	0	0	0	0	0	0	0	0	0
EFM5	1	6	6	6	2	3	4	4	0	0	0	1	28.582	248	1.1203	1.1239	0.93498	0.93713	NaN	NaN	NaN	NaN	3490500000	1857200000	1633300000	664550000	355920000	308630000	811150000	431760000	379400000	851520000	468320000	383200000	1124000000	579480000	544550000	0	0	0	0	0	0	0	0	0	39192000	21691000	17500000
SWC4	1	4	4	4	1	2	2	1	0	0	1	1	55.212	476	NaN	NaN	0.8366	NaN	NaN	NaN	NaN	NaN	344400000	196980000	147420000	92919000	59490000	33429000	0	0	0	195040000	113230000	81809000	51993000	22028000	29965000	0	0	0	0	0	0	2829800	1129800	1700000	1622300	1103200	519110
CUL3	1	1	1	1	1	0	0	0	0	0	0	0	86.114	744	NaN	NaN	NaN	NaN	NaN	NaN	NaN	NaN	57275000	33747000	23528000	57275000	33747000	23528000	0	0	0	0	0	0	0	0	0	0	0	0	0	0	0	0	0	0	0	0	0
SNU71	1	3	3	3	2	3	2	2	0	0	0	0	71.382	620	0.92758	0.95054	1.0545	0.8629	NaN	NaN	NaN	NaN	810270000	434860000	375410000	172730000	90343000	82388000	187900000	119040000	68864000	198060000	86225000	111830000	251580000	139260000	112320000	0	0	0	0	0	0	0	0	0	0	0	0
YGR017W	1	2	2	2	1	2	2	2	0	0	0	0	34.679	297	NaN	1.0606	1.0121	0.96283	NaN	NaN	NaN	NaN	732210000	405840000	326370000	134650000	73712000	60937000	203860000	106320000	97537000	193010000	119560000	73450000	200690000	106250000	94444000	0	0	0	0	0	0	0	0	0	0	0	0
YGR021W	1	2	2	2	0	0	1	0	1	1	2	2	31.699	290	NaN	NaN	NaN	NaN	NaN	NaN	NaN	NaN	256580000	136390000	120190000	0	0	0	0	0	0	0	0	0	0	0	0	28109000	18760000	9349200	30140000	20588000	9551500	66011000	38600000	27411000	132320000	58439000	73884000
THG1	1	1	1	1	1	0	0	0	0	0	0	0	27.757	237	NaN	NaN	NaN	NaN	NaN	NaN	NaN	NaN	51001000	30114000	20887000	51001000	30114000	20887000	0	0	0	0	0	0	0	0	0	0	0	0	0	0	0	0	0	0	0	0	0
IMO32	1	5	5	5	0	1	0	0	1	2	1	4	38.51	342	NaN	NaN	NaN	NaN	NaN	1.0267	NaN	0.85027	704170000	412630000	291540000	0	0	0	88611000	53354000	35256000	0	0	0	0	0	0	57767000	41727000	16041000	115430000	62685000	52749000	88891000	49989000	38902000	353470000	204870000	148590000
CAX4	1	2	2	2	0	0	0	0	1	2	2	2	27.649	239	NaN	NaN	NaN	NaN	NaN	NaN	NaN	1.1134	166040000	94745000	71293000	0	0	0	0	0	0	0	0	0	0	0	0	13761000	9731600	4029100	25174000	14316000	10858000	57923000	32847000	25076000	69180000	37850000	31330000
ORM1	1	1	1	1	1	0	0	0	1	1	1	1	25.244	222	NaN	NaN	NaN	NaN	NaN	NaN	NaN	NaN	410580000	238430000	172150000	114970000	51505000	63466000	0	0	0	0	0	0	0	0	0	85681000	57027000	28655000	10408000	7504100	2903800	106100000	67796000	38308000	93416000	54604000	38812000
LST7	1	1	1	1	0	0	0	0	1	0	1	1	28.136	242	NaN	NaN	NaN	NaN	NaN	NaN	NaN	NaN	184700000	107360000	77342000	0	0	0	0	0	0	0	0	0	0	0	0	35377000	21827000	13549000	0	0	0	67990000	37354000	30636000	81338000	48181000	33156000
PEF1	1	3	3	3	2	2	1	1	1	0	1	1	38.342	335	0.94419	0.90983	0.78508	0.78915	NaN	NaN	NaN	NaN	1033000000	570430000	462530000	229080000	119110000	109960000	316940000	159740000	157200000	192120000	124130000	67996000	213450000	130560000	82890000	16068000	7516600	8551600	0	0	0	34478000	13813000	20665000	30824000	15560000	15265000
VHT1	1	2	2	2	0	0	0	0	1	1	1	0	69.082	593	NaN	NaN	NaN	NaN	NaN	NaN	NaN	NaN	38393000	24763000	13630000	0	0	0	0	0	0	0	0	0	0	0	0	6322500	3496100	2826400	6391800	4485700	1906200	25679000	16781000	8897600	0	0	0
PEX8	1	1	1	1	0	0	1	0	0	0	0	0	68.164	589	NaN	NaN	NaN	NaN	NaN	NaN	NaN	NaN	25327000	17982000	7345500	0	0	0	0	0	0	25327000	17982000	7345500	0	0	0	0	0	0	0	0	0	0	0	0	0	0	0
TWF1	1	5	5	5	4	3	4	1	1	0	1	1	37.07	332	1.038	1.1646	1.0867	NaN	NaN	NaN	NaN	NaN	5163000000	2713500000	2449500000	2782100000	1537400000	1244700000	896190000	400160000	496030000	1123900000	570350000	553500000	267220000	136850000	130380000	29427000	29427000	0	0	0	0	20774000	11218000	9555900	43421000	28067000	15354000
SLX9	1	3	3	3	0	2	1	1	0	0	1	0	24.069	210	NaN	0.90403	NaN	NaN	NaN	NaN	NaN	NaN	860120000	474570000	385550000	0	0	0	413830000	217260000	196570000	322880000	190280000	132600000	123410000	67029000	56382000	0	0	0	0	0	0	0	0	0	0	0	0
UTP22	1	11	11	11	7	6	5	2	1	2	2	2	140.48	1237	0.95627	0.92745	1.084	1.0853	NaN	1.1237	NaN	0.93972	2996900000	1706800000	1290100000	1217200000	702140000	515090000	821760000	463790000	357970000	530050000	290570000	239480000	236060000	135860000	100200000	18950000	10297000	8653200	61362000	35999000	25363000	42013000	27752000	14262000	69496000	40433000	29063000
DRN1	1	3	3	3	1	2	2	1	0	0	0	0	58.205	507	NaN	0.86188	NaN	NaN	NaN	NaN	NaN	NaN	391190000	234010000	157180000	0	0	0	87793000	47110000	40683000	275190000	174380000	100810000	28207000	12516000	15691000	0	0	0	0	0	0	0	0	0	0	0	0
RRP46	1	2	2	2	2	2	2	2	0	0	0	0	24.407	223	0.86088	0.85049	0.98932	1.0529	NaN	NaN	NaN	NaN	1956600000	1146200000	810470000	613630000	374210000	239420000	457480000	268460000	189020000	401030000	232720000	168320000	484480000	270770000	213710000	0	0	0	0	0	0	0	0	0	0	0	0
MDR1	1	2	2	2	2	1	1	1	0	0	0	0	109.26	950	1.0054	1.5089	1.8162	2.1738	NaN	NaN	NaN	NaN	27453000000	12698000000	14754000000	9418100000	5213100000	4205000000	8135700000	3628500000	4507200000	6246400000	2553400000	3693000000	3652600000	1303400000	2349200000	0	0	0	0	0	0	0	0	0	0	0	0
	1	3	3	3	2	1	2	1	0	0	0	0	46.667	400	NaN	NaN	0.85332	NaN	NaN	NaN	NaN	NaN	307380000	194190000	113190000	70020000	35527000	34492000	109210000	72721000	36487000	60063000	37578000	22484000	68086000	48361000	19725000	0	0	0	0	0	0	0	0	0	0	0	0
SHY1	1	4	4	4	1	0	1	1	0	4	2	1	45.055	389	NaN	NaN	NaN	NaN	NaN	1.0434	0.75147	0.81436	567590000	312710000	254880000	114710000	55726000	58985000	0	0	0	128590000	70284000	58310000	85906000	42874000	43032000	0	0	0	52496000	30259000	22237000	107760000	68725000	39036000	78122000	44840000	33282000
	1	2	2	2	2	1	1	1	0	0	0	0	53.437	476	NaN	0.82437	NaN	NaN	NaN	NaN	NaN	NaN	854390000	514870000	339520000	162560000	102680000	59887000	455320000	275080000	180250000	236500000	137120000	99380000	0	0	0	0	0	0	0	0	0	0	0	0	0	0	0
COG2	1	1	1	1	1	1	1	1	0	0	0	0	30.325	262	1.0434	1.09	NaN	NaN	NaN	NaN	NaN	NaN	151920000	84718000	67198000	56863000	32802000	24061000	45514000	25005000	20508000	29204000	15900000	13305000	20334000	11010000	9324300	0	0	0	0	0	0	0	0	0	0	0	0
	1	3	3	3	1	1	0	0	1	0	1	0	25.845	230	1.0412	NaN	NaN	NaN	NaN	NaN	NaN	NaN	266600000	155990000	110610000	242640000	140890000	101750000	7102400	4836700	2265700	0	0	0	0	0	0	517530	357480	160050	0	0	0	16336000	9904900	6431300	0	0	0
SYF2	1	1	1	1	0	0	1	0	0	0	0	0	24.802	215	NaN	NaN	NaN	NaN	NaN	NaN	NaN	NaN	0	0	0	0	0	0	0	0	0	0	0	0	0	0	0	0	0	0	0	0	0	0	0	0	0	0	0
CAF130	1	3	3	3	0	0	1	0	0	0	1	2	128.78	1122	NaN	NaN	NaN	NaN	NaN	NaN	NaN	1.1091	268060000	124500000	143560000	0	0	0	0	0	0	90008000	32831000	57176000	0	0	0	0	0	0	0	0	0	11902000	6799700	5102200	166150000	84866000	81284000
LSB1	1	2	2	2	2	2	2	2	0	0	0	0	26.139	241	0.943	0.95795	1.0569	1.1897	NaN	NaN	NaN	NaN	1765300000	826860000	938400000	467220000	226290000	240930000	494820000	233720000	261100000	421900000	197110000	224780000	381320000	169730000	211590000	0	0	0	0	0	0	0	0	0	0	0	0
BTN2	1	5	5	5	1	0	0	0	0	2	2	5	47.167	410	NaN	NaN	NaN	NaN	NaN	6.5418	6.4387	1.1624	386790000	181530000	205260000	163140000	89111000	74032000	0	0	0	0	0	0	0	0	0	0	0	0	23074000	3354000	19720000	50711000	5684700	45026000	149860000	83385000	66480000
GTR2	1	6	6	6	0	1	1	0	1	1	5	3	38.6	341	NaN	0.95642	NaN	NaN	NaN	NaN	1.147	1.208	1910600000	1169600000	740960000	0	0	0	525580000	282100000	243480000	450180000	253750000	196430000	0	0	0	26993000	16352000	10640000	10711000	7325300	3386000	587990000	435990000	152000000	309120000	174100000	135030000
RBG2	1	9	9	9	6	5	5	5	1	0	0	0	41.006	368	0.96503	1.0094	1.0314	1.0322	NaN	NaN	NaN	NaN	9834900000	5524500000	4310400000	2437600000	1406600000	1031000000	3155800000	1748200000	1407500000	2116400000	1243600000	872760000	2121100000	1123000000	998150000	4022000	3025900	996170	0	0	0	0	0	0	0	0	0
ATF2	1	5	5	5	1	0	0	0	1	2	4	4	61.897	535	NaN	NaN	NaN	NaN	NaN	0.7789	NaN	0.7587	112460000	70113000	42346000	0	0	0	0	0	0	0	0	0	0	0	0	2735000	1946300	788710	11404000	7736600	3667800	9082800	5011200	4071600	89237000	55419000	33818000
OKP1	1	2	2	2	1	2	0	0	0	0	0	0	47.349	406	NaN	0.77371	NaN	NaN	NaN	NaN	NaN	NaN	123530000	76250000	47285000	60474000	36074000	24400000	63061000	40176000	22885000	0	0	0	0	0	0	0	0	0	0	0	0	0	0	0	0	0	0
TIM13	1	5	5	5	4	3	3	3	1	1	4	2	11.286	105	1.0553	1.0621	1.0809	1.0144	NaN	NaN	0.97324	NaN	16502000000	8937000000	7565200000	4282500000	2434700000	1847800000	5397700000	2805600000	2592100000	3990200000	2117400000	1872800000	2733100000	1515800000	1217300000	0	0	0	0	0	0	80215000	50897000	29318000	18439000	12610000	5829300
ZPR1	1	9	9	9	9	7	7	7	0	0	0	0	55.071	486	0.98313	0.99019	0.942	0.97852	NaN	NaN	NaN	NaN	58483000000	33129000000	25354000000	19778000000	11682000000	8096700000	14348000000	7855800000	6491800000	14833000000	8297400000	6535200000	9524400000	5294200000	4230200000	0	0	0	0	0	0	0	0	0	0	0	0
SLI1	1	3	3	3	0	0	0	0	0	0	2	2	54.473	468	NaN	NaN	NaN	NaN	NaN	NaN	NaN	1.6383	50053000	27233000	22821000	0	0	0	0	0	0	0	0	0	0	0	0	0	0	0	0	0	0	11911000	7728900	4182300	38142000	19504000	18639000
RSM27	1	5	5	5	0	0	0	0	1	2	3	3	12.392	110	NaN	NaN	NaN	NaN	NaN	1.0451	1.0567	0.92878	454120000	272230000	181890000	0	0	0	0	0	0	0	0	0	0	0	0	28470000	20365000	8104100	89270000	51980000	37290000	135080000	80882000	54201000	201300000	119000000	82295000
SDA1	1	3	2	2	1	1	1	1	0	0	1	2	86.617	767	NaN	0.84474	0.77653	0.75795	NaN	NaN	NaN	NaN	1694400000	1012900000	681470000	284360000	174860000	109500000	473080000	270640000	202450000	497350000	303520000	193840000	426570000	255530000	171030000	0	0	0	0	0	0	5296300	3916200	1380100	7731100	4465000	3266200
SOL4	1	3	3	3	2	2	1	0	0	0	1	0	28.447	255	NaN	NaN	NaN	NaN	NaN	NaN	NaN	NaN	14239000000	257510000	13981000000	14117000000	136710000	13980000000	50183000	50183000	0	72052000	70611000	1440100	0	0	0	0	0	0	0	0	0	0	0	0	0	0	0
COQ6	1	1	1	1	0	0	1	0	0	0	0	0	53.527	479	NaN	NaN	NaN	NaN	NaN	NaN	NaN	NaN	11474000	6218200	5255600	0	0	0	0	0	0	11474000	6218200	5255600	0	0	0	0	0	0	0	0	0	0	0	0	0	0	0
MTM1	1	2	2	2	0	0	1	0	0	1	1	0	40.763	366	NaN	NaN	NaN	NaN	NaN	NaN	NaN	NaN	40016000	25100000	14917000	0	0	0	0	0	0	24140000	16307000	7832300	0	0	0	0	0	0	5077600	2668300	2409300	10799000	6124500	4674900	0	0	0
SLH1	1	5	5	5	2	3	2	2	0	0	2	0	224.85	1967	1.0929	1.1025	1.2435	1.4302	NaN	NaN	0.75933	NaN	3240600000	1696200000	1544500000	802720000	436370000	366350000	906180000	473860000	432320000	647100000	312140000	334970000	863630000	462780000	400850000	0	0	0	0	0	0	21010000	11037000	9973000	0	0	0
RTT102	1	6	6	6	4	6	6	4	0	0	0	0	17.794	157	1.0208	0.96484	0.95518	0.98372	NaN	NaN	NaN	NaN	10782000000	6059000000	4722800000	3808600000	2035400000	1773200000	3232500000	1811300000	1421200000	2105300000	1265000000	840360000	1635400000	947380000	688020000	0	0	0	0	0	0	0	0	0	0	0	0
RNH70	1	3	3	3	2	2	1	1	0	0	0	0	62.848	553	0.91201	1.0979	NaN	NaN	NaN	NaN	NaN	NaN	712720000	388840000	323880000	193260000	116320000	76933000	223250000	116150000	107110000	133860000	71512000	62347000	162350000	84855000	77498000	0	0	0	0	0	0	0	0	0	0	0	0
CAB4	1	4	4	4	0	0	0	1	0	1	3	3	34.306	305	NaN	NaN	NaN	NaN	NaN	NaN	0.92458	1.0489	190800000	117640000	73166000	0	0	0	0	0	0	0	0	0	0	0	0	0	0	0	23857000	23857000	0	64255000	41289000	22965000	102690000	52491000	50201000
PXR1	1	4	4	4	2	2	1	2	1	1	2	1	31.311	271	NaN	0.85669	0.85557	0.80987	NaN	NaN	0.7697	NaN	1261600000	738750000	522880000	167550000	86056000	81492000	404730000	252030000	152700000	294720000	174170000	120550000	317760000	179630000	138120000	8842300	6217300	2624900	4908600	3336600	1572000	39312000	23436000	15876000	23802000	13867000	9935800
YGR283C	1	2	2	2	2	1	1	1	0	0	0	0	38.546	341	NaN	NaN	NaN	NaN	NaN	NaN	NaN	NaN	116630000	70861000	45773000	39574000	24443000	15130000	27121000	15614000	11507000	24924000	13141000	11783000	25014000	17662000	7352000	0	0	0	0	0	0	0	0	0	0	0	0
COS6	1	2	2	2	0	0	0	0	0	1	2	1	45.678	381	NaN	NaN	NaN	NaN	NaN	NaN	0.58921	NaN	40472000	27635000	12837000	0	0	0	0	0	0	0	0	0	0	0	0	0	0	0	0	0	0	26902000	17976000	8925900	13570000	9658700	3911400
TUB4	1	1	1	1	0	0	0	0	0	0	1	0	52.627	473	NaN	NaN	NaN	NaN	NaN	NaN	NaN	NaN	16654000	13135000	3519400	0	0	0	0	0	0	0	0	0	0	0	0	0	0	0	0	0	0	16654000	13135000	3519400	0	0	0
MKC7	1	3	3	3	1	0	0	0	0	2	1	2	64.268	596	NaN	NaN	NaN	NaN	NaN	1.1748	NaN	0.97551	162790000	100920000	61875000	8580900	8580900	0	0	0	0	0	0	0	0	0	0	0	0	0	55681000	34164000	21516000	11315000	7455200	3859600	87214000	50715000	36499000
SOK2	1	4	4	4	3	1	1	1	0	1	0	0	85.642	785	0.40251	NaN	NaN	NaN	NaN	NaN	NaN	NaN	965620000	781900000	183720000	435340000	336260000	99084000	0	0	0	415990000	383860000	32135000	31412000	16839000	14573000	0	0	0	82868000	44939000	37928000	0	0	0	0	0	0
TOM7	1	1	1	1	1	1	0	0	1	1	1	0	6.8699	60	NaN	NaN	NaN	NaN	NaN	NaN	NaN	NaN	77178000	37877000	39301000	51830000	23515000	28315000	0	0	0	0	0	0	0	0	0	5975000	3647600	2327400	5252400	2951300	2301000	14120000	7762200	6358200	0	0	0
SSU72	1	1	1	1	0	1	1	1	0	0	0	0	23.469	206	NaN	NaN	0.95911	NaN	NaN	NaN	NaN	NaN	779030000	436510000	342530000	0	0	0	194510000	110290000	84216000	409290000	231950000	177340000	175240000	94263000	80973000	0	0	0	0	0	0	0	0	0	0	0	0
RPT4	1	6	6	6	6	2	5	1	1	1	2	1	49.408	437	0.98125	1.0411	1.3783	NaN	NaN	NaN	0.96002	NaN	2186100000	1253100000	933010000	1176400000	683380000	493030000	305010000	169890000	135120000	428350000	245960000	182390000	144560000	74547000	70014000	5122200	3200300	1921800	3718900	2629300	1089600	104740000	61946000	42794000	18154000	11508000	6645800
DCP2	1	9	9	9	6	6	3	5	1	2	1	1	108.67	970	1.0395	0.98026	1.0493	1.1041	NaN	0.91108	NaN	NaN	5018300000	2761400000	2256800000	2234800000	1241900000	992840000	1287600000	705690000	581900000	526410000	293250000	233150000	906680000	483790000	422880000	6142500	3045800	3096700	19190000	11189000	8000500	19598000	12080000	7518100	17883000	10453000	7429600
HHO1	1	11	11	11	1	2	4	4	0	9	1	1	27.803	258	NaN	1.0258	0.92666	0.97524	NaN	1.9561	NaN	NaN	1887400000	1036600000	850830000	117410000	67627000	49779000	505380000	280850000	224530000	494970000	298300000	196670000	515810000	278730000	237070000	0	0	0	184650000	70755000	113890000	19455000	8965800	10489000	49743000	31341000	18402000
THO2	1	3	3	3	1	2	2	0	0	0	0	0	183.93	1597	NaN	1.0838	1.0364	NaN	NaN	NaN	NaN	NaN	428280000	230990000	197290000	73556000	36103000	37453000	205750000	110010000	95742000	148980000	84880000	64096000	0	0	0	0	0	0	0	0	0	0	0	0	0	0	0
MPA43	1	1	1	1	0	1	1	0	0	0	0	0	61.667	542	NaN	NaN	NaN	NaN	NaN	NaN	NaN	NaN	0	0	0	0	0	0	0	0	0	0	0	0	0	0	0	0	0	0	0	0	0	0	0	0	0	0	0
MSO1	1	2	2	2	1	1	1	1	0	0	1	2	23.35	210	NaN	NaN	NaN	NaN	NaN	NaN	NaN	1.052	222100000	113340000	108770000	0	0	0	41516000	21705000	19811000	70865000	32859000	38007000	62365000	30554000	31812000	0	0	0	0	0	0	0	0	0	47358000	28220000	19138000
SUN4	1	3	3	3	2	2	3	2	1	1	1	3	43.442	420	0.848	0.91225	0.8593	0.86541	NaN	NaN	NaN	0.69901	1384100000	794900000	589250000	441460000	252320000	189140000	266190000	140050000	126130000	347180000	197540000	149650000	185410000	102260000	83154000	9519400	6155500	3363900	33119000	22680000	10439000	6244200	3053400	3190800	95020000	70838000	24182000
SNF12	1	3	3	3	3	1	1	1	0	0	0	0	63.87	566	1.0733	NaN	NaN	NaN	NaN	NaN	NaN	NaN	620450000	325140000	295310000	346400000	189840000	156560000	105380000	45861000	59521000	84973000	45265000	39708000	83700000	44173000	39527000	0	0	0	0	0	0	0	0	0	0	0	0
PAP2	1	3	3	3	3	2	1	2	0	0	0	0	66.03	584	0.93194	0.79243	0.90186	0.97818	NaN	NaN	NaN	NaN	2105800000	1270300000	835500000	1066400000	668980000	397430000	364730000	213260000	151470000	291440000	171970000	119470000	383210000	216080000	167120000	0	0	0	0	0	0	0	0	0	0	0	0
SMM1	1	3	3	3	3	3	3	3	0	1	0	0	42.816	384	1.1111	0.99005	0.90874	0.99236	NaN	NaN	NaN	NaN	3458100000	1914200000	1543900000	988670000	536650000	452020000	953730000	533470000	420250000	755870000	437250000	318620000	756880000	404600000	352280000	0	0	0	2927700	2225000	702680	0	0	0	0	0	0
ATP23	1	3	3	3	0	0	0	0	1	2	2	2	26.89	227	NaN	NaN	NaN	NaN	NaN	NaN	NaN	1.2692	120980000	59871000	61111000	0	0	0	0	0	0	0	0	0	0	0	0	0	0	0	3521000	1990100	1530900	3931600	2218000	1713600	113530000	55663000	57866000
MRPL50	1	4	4	4	1	0	0	0	0	3	2	1	16.283	139	1.1565	NaN	NaN	NaN	NaN	NaN	0.87187	NaN	484100000	273140000	210960000	334000000	175500000	158490000	0	0	0	0	0	0	0	0	0	0	0	0	30373000	18826000	11547000	45076000	26710000	18366000	74658000	52105000	22553000
MPP6	1	3	3	3	2	2	3	3	0	0	0	0	21.142	186	2.3626	1.4789	1.1034	1.0126	NaN	NaN	NaN	NaN	923480000	445000000	478480000	270050000	88212000	181840000	217680000	97735000	119940000	206190000	129290000	76900000	229570000	129760000	99808000	0	0	0	0	0	0	0	0	0	0	0	0
	1	3	3	3	3	3	1	1	0	0	0	0	48.121	429	1.0055	1.036	NaN	NaN	NaN	NaN	NaN	NaN	534480000	158430000	376040000	281820000	96763000	185060000	206540000	61671000	144870000	31127000	0	31127000	14991000	0	14991000	0	0	0	0	0	0	0	0	0	0	0	0
ZRG17	1	2	2	2	0	0	0	1	2	1	1	1	67.46	605	NaN	NaN	NaN	NaN	NaN	NaN	NaN	NaN	27696000	17896000	9800200	0	0	0	0	0	0	0	0	0	0	0	0	8105400	5850900	2254600	4160400	2563800	1596600	9155400	5996500	3158900	6275300	3485100	2790200
	1	5	5	5	1	1	1	0	1	5	4	4	28.636	256	NaN	NaN	NaN	NaN	NaN	1.012	0.85721	1.235	735120000	428330000	306790000	125490000	74080000	51413000	124090000	70949000	53145000	109540000	56608000	52927000	0	0	0	38565000	25485000	13081000	86278000	50510000	35768000	107710000	63711000	43996000	143450000	86990000	56458000
TRM112	1	3	3	3	3	3	3	3	0	0	0	0	15.066	135	1.0239	1.0696	1.0062	1.0276	NaN	NaN	NaN	NaN	2500100000	1336300000	1163800000	562050000	298670000	263380000	658460000	347000000	311450000	706420000	401190000	305230000	573210000	289470000	283740000	0	0	0	0	0	0	0	0	0	0	0	0
FPK1	1	4	4	4	1	0	1	0	1	0	2	2	100.55	893	NaN	NaN	NaN	NaN	NaN	NaN	0.8922	1.1286	309620000	175130000	134490000	160380000	86226000	74157000	0	0	0	0	0	0	0	0	0	11202000	6518300	4683900	0	0	0	70341000	40319000	30021000	67697000	42070000	25628000
	1	1	1	1	0	0	0	0	0	1	0	0	44.542	393	NaN	NaN	NaN	NaN	NaN	NaN	NaN	NaN	13192000	7378100	5814300	0	0	0	0	0	0	0	0	0	0	0	0	0	0	0	13192000	7378100	5814300	0	0	0	0	0	0
ESF2	1	5	5	5	2	1	3	2	0	1	1	2	36.407	316	NaN	NaN	0.81042	0.78136	NaN	NaN	NaN	NaN	1987200000	1146000000	841140000	411440000	213620000	197810000	334510000	193910000	140590000	781410000	480350000	301060000	432410000	245330000	187080000	0	0	0	18222000	8383800	9838400	0	0	0	9168800	4420300	4748500
	1	1	1	1	0	0	0	0	1	0	0	0	24.317	219	NaN	NaN	NaN	NaN	NaN	NaN	NaN	NaN	0	0	0	0	0	0	0	0	0	0	0	0	0	0	0	0	0	0	0	0	0	0	0	0	0	0	0
DSE4	1	3	3	3	3	1	0	0	0	1	0	1	121.06	1117	1.1419	0.94663	NaN	NaN	NaN	0.60843	NaN	NaN	255210000	134470000	120740000	182730000	99948000	82780000	69239000	32348000	36891000	0	0	0	0	0	0	0	0	0	3241600	2175500	1066200	0	0	0	0	0	0
DUS1	1	6	6	6	3	4	2	2	0	0	0	0	48.131	423	0.77258	1.1097	NaN	1.0936	NaN	NaN	NaN	NaN	1313300000	726520000	586740000	376320000	230070000	146250000	494380000	261180000	233200000	177230000	107330000	69900000	265340000	127940000	137400000	0	0	0	0	0	0	0	0	0	0	0	0
CWC24	1	3	3	3	0	0	1	1	1	0	0	0	29.74	259	NaN	NaN	NaN	NaN	NaN	NaN	NaN	NaN	500430000	266300000	234120000	0	0	0	0	0	0	132220000	76382000	55833000	368210000	189920000	178290000	0	0	0	0	0	0	0	0	0	0	0	0
CAF40	1	1	1	1	0	0	0	0	1	1	0	0	41.155	373	NaN	NaN	NaN	NaN	NaN	NaN	NaN	NaN	0	0	0	0	0	0	0	0	0	0	0	0	0	0	0	0	0	0	0	0	0	0	0	0	0	0	0
WSC2	1	1	1	1	1	0	0	0	1	0	1	1	52.292	503	NaN	NaN	NaN	NaN	NaN	NaN	NaN	NaN	253870000	141610000	112260000	145460000	64401000	81059000	0	0	0	0	0	0	0	0	0	17747000	17747000	0	0	0	0	33959000	23816000	10143000	56703000	35643000	21060000
HCH1	1	6	6	6	5	6	5	5	0	0	2	2	17.246	153	1.0098	1.0369	1.0508	1.1641	NaN	NaN	0.98074	1.1601	35798000000	19122000000	16675000000	13636000000	7417600000	6218000000	8244000000	4274100000	3969900000	7688300000	4169700000	3518600000	6152000000	3217800000	2934100000	0	0	0	0	0	0	25548000	15089000	10459000	52225000	27792000	24434000
GOR1	1	4	4	4	3	3	2	3	0	0	0	1	38.831	350	1.1052	1.2192	1.0998	1.3227	NaN	NaN	NaN	NaN	1573600000	804390000	769250000	500780000	271090000	229690000	470830000	240660000	230170000	336140000	176790000	159340000	216320000	89369000	126950000	0	0	0	0	0	0	0	0	0	49572000	26473000	23098000
FOL1	1	7	7	7	3	3	3	2	0	1	2	1	93.119	824	0.94434	0.9209	0.91329	0.94764	NaN	NaN	NaN	NaN	2368200000	1319000000	1049200000	659770000	364790000	294980000	603970000	341330000	262640000	602100000	328810000	273280000	339350000	188000000	151360000	0	0	0	12014000	7970400	4043600	41594000	27411000	14183000	109400000	60676000	48719000
GIS2	1	3	3	3	2	3	2	2	0	0	0	0	17.103	153	1.9075	0.99347	1.0858	1.0665	NaN	NaN	NaN	NaN	5222600000	3014600000	2208000000	1117800000	601130000	516690000	1333300000	743800000	589550000	1302400000	790130000	512320000	1469000000	879560000	589470000	0	0	0	0	0	0	0	0	0	0	0	0
TEX1	1	2	2	2	1	2	2	2	0	0	0	0	47.166	422	NaN	1.0213	0.95544	1.0805	NaN	NaN	NaN	NaN	753170000	431990000	321180000	108350000	68104000	40249000	188340000	94884000	93453000	196540000	117900000	78642000	259930000	151100000	108830000	0	0	0	0	0	0	0	0	0	0	0	0
VPS75	1	1	1	1	1	0	0	0	0	0	0	0	30.615	264	NaN	NaN	NaN	NaN	NaN	NaN	NaN	NaN	284880000	158330000	126550000	284880000	158330000	126550000	0	0	0	0	0	0	0	0	0	0	0	0	0	0	0	0	0	0	0	0	0
CWC25	1	2	2	2	1	1	1	1	0	0	0	0	20.374	179	NaN	NaN	NaN	NaN	NaN	NaN	NaN	NaN	167930000	99362000	68571000	47298000	26924000	20373000	50899000	29138000	21761000	37887000	22633000	15254000	31849000	20666000	11183000	0	0	0	0	0	0	0	0	0	0	0	0
CSL4	1	4	4	4	3	3	3	2	0	0	0	0	31.583	292	1.0151	1.074	1.0215	1.0015	NaN	NaN	NaN	NaN	1550500000	827230000	723320000	340720000	173290000	167430000	309010000	159610000	149400000	450500000	253770000	196730000	450310000	240550000	209750000	0	0	0	0	0	0	0	0	0	0	0	0
CNM67	1	4	4	4	1	0	0	0	0	3	0	0	67.399	581	NaN	NaN	NaN	NaN	NaN	1.75	NaN	NaN	74390000	35585000	38805000	13520000	7891000	5628800	0	0	0	0	0	0	0	0	0	0	0	0	60871000	27694000	33176000	0	0	0	0	0	0
SQS1	1	1	1	1	0	0	0	0	0	0	1	0	86.949	767	NaN	NaN	NaN	NaN	NaN	NaN	NaN	NaN	4610400	2865600	1744800	0	0	0	0	0	0	0	0	0	0	0	0	0	0	0	0	0	0	4610400	2865600	1744800	0	0	0
DUG3	1	2	2	2	0	2	1	1	0	0	0	0	40.18	357	NaN	NaN	NaN	NaN	NaN	NaN	NaN	NaN	234570000	121420000	113150000	0	0	0	87124000	38335000	48789000	85782000	47474000	38308000	61668000	35614000	26054000	0	0	0	0	0	0	0	0	0	0	0	0
IPI3	1	6	6	6	3	3	3	3	0	1	1	3	61.772	555	0.91389	0.88334	0.82556	0.93314	NaN	NaN	NaN	0.92433	6068200000	3433600000	2634700000	2892900000	1614100000	1278900000	1323700000	710250000	613490000	763240000	495030000	268210000	948090000	536250000	411840000	0	0	0	7676300	4412800	3263400	26667000	11887000	14781000	105840000	61640000	44203000
MRPL22	1	5	5	5	0	1	1	0	1	3	3	2	34.897	309	NaN	NaN	NaN	NaN	NaN	0.97546	0.94305	0.91661	786680000	469470000	317210000	0	0	0	0	0	0	0	0	0	0	0	0	5045800	3605900	1439900	74569000	44725000	29844000	354110000	211120000	143000000	352950000	210020000	142930000
BNI5	1	11	11	11	9	5	7	4	1	0	1	1	49.694	448	1.0239	1.056	0.9944	0.92869	NaN	NaN	NaN	NaN	7103500000	3940700000	3162900000	2319700000	1272200000	1047400000	1999900000	1108600000	891310000	1568900000	883330000	685620000	1170100000	647020000	523080000	11726000	8574000	3151900	0	0	0	14094000	10026000	4067900	19141000	10914000	8226700
RIA1	1	5	5	5	3	4	3	1	0	0	0	0	124.46	1110	1.0138	1.1236	0.79191	NaN	NaN	NaN	NaN	NaN	3073700000	1657400000	1416300000	902690000	513690000	389000000	1483400000	747770000	735600000	476000000	274220000	201780000	211610000	121680000	89923000	0	0	0	0	0	0	0	0	0	0	0	0
IGO1	1	4	4	4	1	3	2	4	0	0	0	0	18.051	168	NaN	1.3275	NaN	1.2072	NaN	NaN	NaN	NaN	1129600000	573620000	555980000	0	0	0	417480000	194690000	222790000	278690000	156560000	122130000	433420000	222370000	211050000	0	0	0	0	0	0	0	0	0	0	0	0
CUZ1	1	2	2	2	1	2	2	2	0	0	0	0	31.516	274	NaN	0.93305	0.87986	0.93917	NaN	NaN	NaN	NaN	1024700000	561330000	463360000	137380000	75164000	62214000	368970000	212530000	156440000	293720000	157540000	136180000	224620000	116100000	108520000	0	0	0	0	0	0	0	0	0	0	0	0
GIM3	1	3	3	3	3	3	3	3	0	0	0	0	15.18	129	0.95243	0.95527	0.95254	0.97174	NaN	NaN	NaN	NaN	8461300000	4751600000	3709700000	2153700000	1237900000	915840000	2377400000	1334200000	1043200000	2315900000	1292400000	1023500000	1614300000	887140000	727160000	0	0	0	0	0	0	0	0	0	0	0	0
LSM7	1	3	3	3	0	0	0	0	1	1	3	2	13.006	115	NaN	NaN	NaN	NaN	NaN	NaN	0.99149	NaN	83349000	31377000	51972000	0	0	0	0	0	0	0	0	0	0	0	0	3376000	0	3376000	4004200	0	4004200	54378000	24577000	29801000	21590000	6799800	14790000
AAH1	1	8	8	8	5	5	5	4	1	1	2	1	39.635	347	0.90923	0.94716	0.89619	0.90972	NaN	NaN	0.95689	NaN	14506000000	8173500000	6332900000	6587400000	3720300000	2867100000	3037700000	1684900000	1352700000	3057700000	1758800000	1298900000	1721500000	952840000	768690000	19097000	11060000	8037100	5625600	4150200	1475300	58049000	34603000	23446000	19283000	6776800	12506000
FYV6	1	3	3	3	3	2	2	1	0	0	0	0	20.025	173	1.1652	1.063	NaN	NaN	NaN	NaN	NaN	NaN	506260000	241670000	264600000	269780000	126680000	143100000	104940000	52750000	52192000	68186000	36524000	31662000	63355000	25713000	37642000	0	0	0	0	0	0	0	0	0	0	0	0
FAR11	1	6	6	6	2	1	0	2	0	1	2	1	109.79	953	1.3568	NaN	NaN	2.185	NaN	NaN	1.0719	NaN	997780000	459560000	538220000	333340000	181190000	152150000	323040000	139970000	183070000	0	0	0	284740000	104880000	179860000	0	0	0	35267000	19156000	16111000	15135000	9919600	5215500	6256000	4444600	1811400
NAF1	1	2	2	2	2	1	2	0	0	0	0	0	54.949	492	0.96712	NaN	NaN	NaN	NaN	NaN	NaN	NaN	167870000	101970000	65900000	131170000	80789000	50384000	0	0	0	36696000	21180000	15516000	0	0	0	0	0	0	0	0	0	0	0	0	0	0	0
NMA111	1	9	9	9	7	7	8	6	0	0	0	0	110.88	997	0.9964	0.99358	0.92922	0.95413	NaN	NaN	NaN	NaN	7886300000	4364700000	3521600000	2355700000	1287500000	1068200000	2663700000	1449600000	1214200000	1473100000	819950000	653160000	1393800000	807700000	586090000	0	0	0	0	0	0	0	0	0	0	0	0
	1	1	1	1	0	0	0	0	1	1	1	1	13.243	115	NaN	NaN	NaN	NaN	NaN	NaN	NaN	NaN	0	0	0	0	0	0	0	0	0	0	0	0	0	0	0	0	0	0	0	0	0	0	0	0	0	0	0
NCS2	1	4	4	4	1	0	1	1	0	0	2	1	56.472	493	0.91369	NaN	NaN	NaN	NaN	NaN	0.61765	NaN	698200000	476700000	221490000	221080000	130830000	90255000	0	0	0	29976000	13477000	16499000	89522000	54359000	35162000	0	0	0	0	0	0	339930000	266860000	73077000	17686000	11185000	6501200
DMA2	1	3	3	3	0	1	1	1	0	1	0	1	57.584	522	NaN	NaN	NaN	NaN	NaN	NaN	NaN	NaN	203330000	112340000	90988000	0	0	0	83124000	49419000	33705000	42031000	23702000	18329000	0	0	0	0	0	0	67816000	36181000	31636000	0	0	0	10359000	3041200	7318200
	1	5	5	5	4	1	2	3	0	0	0	0	30.748	270	0.99104	NaN	1.0376	0.94743	NaN	NaN	NaN	NaN	1556900000	789610000	767300000	1136000000	565140000	570820000	74404000	44827000	29578000	251910000	126960000	124950000	94637000	52680000	41957000	0	0	0	0	0	0	0	0	0	0	0	0
NST1	1	3	3	3	2	1	1	2	0	0	0	0	141.51	1240	0.99783	NaN	NaN	0.98311	NaN	NaN	NaN	NaN	668040000	372300000	295740000	339220000	197960000	141260000	95399000	49464000	45935000	105940000	49671000	56272000	127480000	75207000	52270000	0	0	0	0	0	0	0	0	0	0	0	0
EOS1	1	1	1	1	0	0	0	0	1	1	0	0	41.673	366	NaN	NaN	NaN	NaN	NaN	NaN	NaN	NaN	5745200	4178500	1566700	0	0	0	0	0	0	0	0	0	0	0	0	3450800	2694500	756300	2294400	1484000	810420	0	0	0	0	0	0
NIS1	1	2	2	2	1	0	1	0	0	0	0	0	45.908	407	NaN	NaN	NaN	NaN	NaN	NaN	NaN	NaN	69156000	43231000	25924000	0	0	0	0	0	0	69156000	43231000	25924000	0	0	0	0	0	0	0	0	0	0	0	0	0	0	0
APJ1	1	1	1	1	0	0	0	0	0	0	1	0	58.888	528	NaN	NaN	NaN	NaN	NaN	NaN	NaN	NaN	10285000	6336300	3948400	0	0	0	0	0	0	0	0	0	0	0	0	0	0	0	0	0	0	10285000	6336300	3948400	0	0	0
IMP4	1	3	3	3	2	2	1	2	1	0	2	1	33.482	290	1.0288	0.93914	NaN	1.1421	NaN	NaN	0.66581	NaN	1070500000	617000000	453540000	373640000	211130000	162510000	323000000	187720000	135280000	0	0	0	298850000	169560000	129290000	9897000	6983900	2913100	0	0	0	49858000	33933000	15925000	15293000	7665600	7627200
RNH201	1	1	1	1	1	1	1	0	0	0	0	0	34.875	307	NaN	NaN	NaN	NaN	NaN	NaN	NaN	NaN	25191000	25191000	0	25191000	25191000	0	0	0	0	0	0	0	0	0	0	0	0	0	0	0	0	0	0	0	0	0	0
ARP5	1	9	9	9	5	3	3	6	0	0	1	1	87.559	755	0.93391	0.89174	1.3008	0.95917	NaN	NaN	NaN	NaN	1257900000	681170000	576730000	563800000	324800000	239000000	111880000	59207000	52675000	115590000	53262000	62333000	440090000	231550000	208540000	0	0	0	0	0	0	13412000	5728400	7683300	13123000	6620800	6502400
COG5	1	1	1	1	1	1	1	1	0	0	0	0	45.604	403	NaN	NaN	NaN	0.65084	NaN	NaN	NaN	NaN	2380500000	1044700000	1335700000	893820000	282040000	611780000	620270000	274850000	345420000	316640000	174610000	142030000	549770000	313250000	236510000	0	0	0	0	0	0	0	0	0	0	0	0
	1	3	3	3	2	1	0	1	0	0	0	0	31.437	270	0.6775	NaN	NaN	NaN	NaN	NaN	NaN	NaN	794720000	533660000	261060000	639280000	444710000	194570000	155440000	88953000	66489000	0	0	0	0	0	0	0	0	0	0	0	0	0	0	0	0	0	0
COG6	1	2	2	2	1	1	1	2	0	0	0	0	96.975	839	NaN	NaN	NaN	0.88716	NaN	NaN	NaN	NaN	370960000	213700000	157260000	95516000	58440000	37076000	95064000	56280000	38784000	94531000	59014000	35518000	85848000	39963000	45885000	0	0	0	0	0	0	0	0	0	0	0	0
	1	1	1	1	0	0	1	1	0	0	0	0	50.963	456	NaN	NaN	NaN	NaN	NaN	NaN	NaN	NaN	281330000	150460000	130870000	0	0	0	0	0	0	150840000	87005000	63836000	130490000	63454000	67033000	0	0	0	0	0	0	0	0	0	0	0	0
	1	4	4	4	4	3	1	0	0	0	0	0	43.848	389	0.99936	1.1111	NaN	NaN	NaN	NaN	NaN	NaN	2349100000	1232700000	1116400000	1337200000	718560000	618600000	777040000	393820000	383220000	234880000	120290000	114590000	0	0	0	0	0	0	0	0	0	0	0	0	0	0	0
SIW14	1	1	1	1	1	1	1	1	0	0	0	0	32.755	281	NaN	NaN	NaN	NaN	NaN	NaN	NaN	NaN	301240000	163800000	137440000	291390000	161590000	129810000	0	0	0	0	0	0	9845200	2215400	7629700	0	0	0	0	0	0	0	0	0	0	0	0
KTR5	1	2	2	2	1	1	0	0	1	1	1	0	61.727	522	NaN	NaN	NaN	NaN	NaN	NaN	NaN	NaN	108990000	66947000	42044000	48611000	27319000	21292000	42841000	27896000	14946000	0	0	0	0	0	0	8354900	5756900	2598100	5616900	3384900	2232000	3566900	2590900	976060	0	0	0
CRZ1	1	4	4	4	2	1	3	1	0	0	0	0	76.3	678	1.1424	NaN	1.0669	NaN	NaN	NaN	NaN	NaN	1143200000	584810000	558360000	776890000	397270000	379620000	183550000	84548000	99007000	122380000	75864000	46516000	60343000	27129000	33214000	0	0	0	0	0	0	0	0	0	0	0	0
FAP1	1	4	4	4	1	1	1	1	0	0	0	0	108.49	965	NaN	NaN	NaN	NaN	NaN	NaN	NaN	NaN	180980000	124900000	56082000	51275000	33716000	17560000	36623000	24044000	12579000	21847000	21847000	0	71237000	45294000	25943000	0	0	0	0	0	0	0	0	0	0	0	0
HDA1	1	3	3	3	3	1	1	1	0	1	1	0	80.069	706	1.0829	0.95991	NaN	1.0442	NaN	NaN	NaN	NaN	1162800000	598620000	564190000	702550000	353520000	349020000	113030000	56110000	56924000	126570000	66891000	59678000	204600000	113700000	90898000	0	0	0	2889000	1654600	1234400	13174000	6741700	6431900	0	0	0
ARK1	1	3	3	3	3	1	1	1	0	0	0	0	71.372	638	0.89567	NaN	NaN	NaN	NaN	NaN	NaN	NaN	311630000	176900000	134730000	127770000	79169000	48603000	78117000	47453000	30663000	58042000	30018000	28024000	47697000	20259000	27438000	0	0	0	0	0	0	0	0	0	0	0	0
	1	1	1	1	0	0	1	1	0	0	0	0	49.913	444	NaN	NaN	NaN	NaN	NaN	NaN	NaN	NaN	28633000	16169000	12464000	0	0	0	0	0	0	17379000	9810700	7568100	11254000	6358400	4895700	0	0	0	0	0	0	0	0	0	0	0	0
ASI3	1	2	2	2	0	0	0	0	1	0	2	1	77.648	676	NaN	NaN	NaN	NaN	NaN	NaN	0.99804	NaN	114480000	67233000	47251000	0	0	0	0	0	0	0	0	0	0	0	0	19026000	10201000	8825400	0	0	0	63933000	35398000	28535000	31525000	21635000	9890400
SUB1	1	6	6	6	3	4	5	4	1	1	1	1	33.102	292	1.0349	1.0538	1.0254	1.1417	NaN	NaN	NaN	NaN	4811900000	2585200000	2226700000	1057700000	579050000	478600000	1170800000	616640000	554190000	1142600000	594130000	548500000	1257500000	680520000	577000000	28419000	19622000	8796600	2056500	1371000	685530	62249000	37963000	24286000	90587000	55919000	34668000
RPL15B	1	13	1	1	7	5	7	5	4	6	7	6	24.422	204	NaN	NaN	NaN	NaN	NaN	NaN	NaN	NaN	775390000	464000000	311390000	194400000	127250000	67147000	235200000	142930000	92268000	345790000	193820000	151970000	0	0	0	0	0	0	0	0	0	0	0	0	0	0	0
ORC1	1	2	2	2	1	2	1	1	0	0	0	0	104.4	914	NaN	NaN	NaN	NaN	NaN	NaN	NaN	NaN	406550000	235400000	171150000	133100000	70672000	62423000	110860000	73063000	37802000	94372000	58010000	36362000	68215000	33654000	34561000	0	0	0	0	0	0	0	0	0	0	0	0
MOT3	1	2	2	2	1	1	0	1	0	0	1	0	54.381	490	NaN	NaN	NaN	NaN	NaN	NaN	NaN	NaN	552990000	296560000	256430000	94008000	54276000	39732000	114970000	59670000	55296000	0	0	0	75115000	42677000	32438000	0	0	0	0	0	0	268910000	139940000	128970000	0	0	0
ZDS2	1	5	5	5	2	1	0	2	0	0	0	1	105.49	942	NaN	NaN	NaN	0.69927	NaN	NaN	NaN	NaN	662220000	381480000	280740000	350160000	211090000	139080000	95804000	51267000	44537000	0	0	0	147240000	80362000	66876000	0	0	0	0	0	0	0	0	0	69013000	38764000	30249000
VPS9	1	5	5	5	4	4	3	2	0	0	0	0	52.482	451	1.2041	0.907	0.90804	NaN	NaN	NaN	NaN	NaN	652220000	354770000	297450000	293070000	148430000	144650000	193330000	108190000	85133000	165820000	98151000	67667000	0	0	0	0	0	0	0	0	0	0	0	0	0	0	0
ORC3	1	2	2	2	1	2	1	1	0	0	0	0	72.076	616	NaN	1.6162	NaN	NaN	NaN	NaN	NaN	NaN	407650000	232010000	175640000	135300000	77608000	57697000	98413000	44771000	53642000	97435000	61393000	36042000	76493000	48239000	28255000	0	0	0	0	0	0	0	0	0	0	0	0
ORC4	1	1	1	1	1	0	0	0	0	0	1	0	60.705	529	NaN	NaN	NaN	NaN	NaN	NaN	NaN	NaN	7752400	4739400	3013000	0	0	0	0	0	0	0	0	0	0	0	0	0	0	0	0	0	0	7752400	4739400	3013000	0	0	0
DAK1	1	14	14	14	12	10	9	11	1	1	3	2	62.206	584	1.0771	1.1155	1.1687	1.2241	NaN	NaN	0.8514	0.95615	44180000000	22931000000	21249000000	11975000000	6584700000	5390700000	9983700000	5019900000	4963800000	9769100000	4833700000	4935400000	12398000000	6455700000	5942000000	14695000	10127000	4567500	10250000	6995900	3254600	19631000	13952000	5678400	9457500	5682000	3775500
DOS2	1	8	8	8	3	4	5	6	0	0	0	0	35.964	310	0.97946	0.91013	1.007	1.07	NaN	NaN	NaN	NaN	5638800000	3123200000	2515600000	2094800000	1156100000	938670000	528960000	327830000	201120000	1257800000	722270000	535530000	1757200000	916970000	840260000	0	0	0	0	0	0	0	0	0	0	0	0
UFD2	1	2	2	2	2	1	0	0	0	0	1	1	109.91	961	0.9362	NaN	NaN	NaN	NaN	NaN	NaN	NaN	136230000	86506000	49723000	114320000	70695000	43629000	7454800	4868200	2586600	0	0	0	0	0	0	0	0	0	0	0	0	3035400	1989400	1046000	11414000	8953100	2461000
DNM1	1	9	9	9	4	6	7	4	0	0	0	1	84.971	757	1.017	1.0551	0.88824	0.60734	NaN	NaN	NaN	NaN	1408100000	710750000	697380000	308170000	191030000	117140000	456850000	247280000	209570000	293430000	172280000	121140000	237970000	52937000	185030000	0	0	0	0	0	0	0	0	0	111710000	47212000	64500000
PRO2	1	13	13	13	10	7	6	7	0	0	2	4	49.74	456	1.0184	0.99668	0.94738	1.0262	NaN	NaN	0.99386	0.96684	13220000000	7179500000	6040300000	4175400000	2311700000	1863700000	2904100000	1568100000	1336000000	2975900000	1614100000	1361800000	2990200000	1585300000	1404900000	0	0	0	0	0	0	48953000	29700000	19253000	125200000	70616000	54583000
REX2	1	2	2	2	2	2	2	1	0	0	0	0	30.87	269	1.0854	1.284	0.94817	0.99395	NaN	NaN	NaN	NaN	3170400000	1673400000	1497000000	970760000	512690000	458070000	1161200000	587410000	573810000	754790000	406930000	347860000	283610000	166390000	117210000	0	0	0	0	0	0	0	0	0	0	0	0
RPL22B	1	3	2	2	2	3	3	3	2	1	1	1	13.826	122	NaN	0.90719	0.97333	0.80077	NaN	NaN	NaN	NaN	3226600000	1798600000	1428000000	0	0	0	671830000	380830000	291000000	1360000000	723910000	636110000	1194800000	693860000	500930000	0	0	0	0	0	0	0	0	0	0	0	0
LSM3	1	2	2	2	1	1	1	1	0	0	1	1	10.03	89	0.9218	1.2279	0.9576	NaN	NaN	NaN	NaN	NaN	386380000	203050000	183330000	104930000	58834000	46096000	109930000	58447000	51481000	145040000	71905000	73135000	13712000	7455900	6255600	0	0	0	0	0	0	0	0	0	12769000	6407600	6361800
TIM8	1	2	2	2	2	2	2	2	0	0	0	0	9.7638	87	0.92782	0.94623	0.93887	0.9046	NaN	NaN	NaN	NaN	12200000000	6897500000	5302200000	2619600000	1588100000	1031500000	3754500000	2041700000	1712800000	3279700000	1787000000	1492700000	2545900000	1480700000	1065200000	0	0	0	0	0	0	0	0	0	0	0	0
HHT1	1	2	2	2	0	1	1	1	0	0	0	0	15.356	136	NaN	NaN	NaN	NaN	NaN	NaN	NaN	NaN	57377000	36533000	20844000	0	0	0	2257500	1255000	1002500	0	0	0	55120000	35278000	19842000	0	0	0	0	0	0	0	0	0	0	0	0
DAD3	1	3	3	3	1	1	1	2	1	1	1	1	10.848	94	NaN	NaN	NaN	NaN	NaN	NaN	NaN	NaN	1057000000	565740000	491210000	227540000	103080000	124460000	334510000	171280000	163230000	246640000	138370000	108270000	118310000	42959000	75351000	43401000	39256000	4145200	37482000	33913000	3568600	49066000	36877000	12189000	0	0	0
ADE12	1	6	6	6	4	3	3	3	0	0	1	0	48.279	433	0.94076	0.99348	0.95465	0.90295	NaN	NaN	NaN	NaN	3389200000	1853900000	1535300000	1040500000	586740000	453760000	854110000	455340000	398770000	759130000	375460000	383670000	619600000	370940000	248660000	0	0	0	0	0	0	115900000	65428000	50473000	0	0	0
ARP4	1	5	5	5	2	3	2	1	0	2	0	0	54.831	489	1.1731	1.0045	NaN	NaN	NaN	NaN	NaN	NaN	760330000	388020000	372310000	152190000	76186000	76007000	288680000	140050000	148630000	164990000	95118000	69872000	150170000	74440000	75728000	0	0	0	4303200	2228400	2074800	0	0	0	0	0	0
TOM5	1	3	3	3	2	3	3	3	1	1	1	1	5.9849	50	1.2675	0.98002	1.0355	1.0245	NaN	1.1467	1.067	NaN	7804400000	4346300000	3458200000	1834200000	1066900000	767270000	2079300000	1116700000	962570000	1937500000	1091600000	845950000	1583000000	845400000	737600000	19664000	13715000	5948800	45701000	26385000	19316000	187320000	116080000	71243000	117790000	69512000	48281000
TIM11	1	2	2	2	0	0	0	1	0	0	2	2	10.875	96	NaN	NaN	NaN	NaN	NaN	NaN	1.0433	1.0368	783590000	432580000	351020000	0	0	0	0	0	0	0	0	0	406530000	216340000	190190000	0	0	0	0	0	0	119960000	69370000	50593000	257100000	146870000	110230000
ATP19	1	1	1	1	1	1	0	0	0	0	0	0	7.5337	68	NaN	NaN	NaN	NaN	NaN	NaN	NaN	NaN	269120000	144930000	124190000	168800000	92877000	75921000	100320000	52056000	48268000	0	0	0	0	0	0	0	0	0	0	0	0	0	0	0	0	0	0
TIM10	1	6	6	6	6	4	4	6	0	0	0	0	10.305	93	1.0277	0.98973	1.0214	0.79564	NaN	NaN	NaN	NaN	32587000000	18039000000	14548000000	9504600000	5271200000	4233400000	6530800000	3507100000	3023700000	8726500000	4816700000	3909800000	7825200000	4443600000	3381600000	0	0	0	0	0	0	0	0	0	0	0	0
AIM11	1	2	2	2	1	1	0	1	0	0	2	0	15.753	137	NaN	NaN	NaN	NaN	NaN	NaN	NaN	NaN	278600000	158580000	120020000	51974000	27587000	24388000	107250000	48864000	58387000	0	0	0	77563000	47467000	30096000	0	0	0	0	0	0	41811000	34663000	7148300	0	0	0
SEC5	1	5	5	5	3	1	1	2	0	0	0	1	112.12	971	NaN	NaN	NaN	1.0928	NaN	NaN	NaN	NaN	341010000	179710000	161290000	100100000	61703000	38392000	0	0	0	125470000	64685000	60780000	112930000	51919000	61008000	0	0	0	0	0	0	0	0	0	2517600	1407200	1110400
CTR9	1	13	13	13	7	5	3	2	1	0	5	5	124.71	1077	1.0589	0.94728	0.8843	0.84999	NaN	NaN	1.1112	0.97406	5189200000	2848200000	2341000000	2638200000	1449300000	1188800000	1466900000	802020000	664910000	528010000	293030000	234980000	450170000	243320000	206850000	8709100	4798700	3910400	0	0	0	54278000	30441000	23837000	42875000	25206000	17669000
TMA20	1	10	10	10	8	6	5	4	1	1	2	2	20.277	181	0.90493	1.0063	0.99256	1.1032	NaN	NaN	NaN	NaN	4893900000	2650500000	2243400000	1845100000	1016300000	828800000	1478100000	792700000	685420000	983540000	535070000	448470000	541030000	285280000	255750000	5070700	3537900	1532800	0	0	0	25920000	9744600	16175000	15154000	7910000	7244100
CDC55	1	8	8	8	6	5	5	5	0	0	1	1	59.661	526	1.0097	0.93243	0.91067	1.1559	NaN	NaN	NaN	NaN	2976100000	1670900000	1305200000	792140000	421430000	370720000	657940000	360120000	297820000	831740000	476760000	354980000	670950000	398600000	272350000	0	0	0	0	0	0	4672800	2991800	1680900	18659000	10980000	7679400
APS2	1	1	1	1	0	0	0	0	0	0	1	0	17.373	147	NaN	NaN	NaN	NaN	NaN	NaN	NaN	NaN	0	0	0	0	0	0	0	0	0	0	0	0	0	0	0	0	0	0	0	0	0	0	0	0	0	0	0
SEN1	1	5	5	5	3	2	3	3	0	0	0	1	252.49	2231	0.84053	0.86688	0.89115	0.79923	NaN	NaN	NaN	NaN	543710000	285830000	257880000	175320000	91100000	84218000	122260000	65904000	56357000	144810000	76324000	68481000	90442000	47673000	42768000	0	0	0	0	0	0	0	0	0	10881000	4826800	6054000
NAM8	1	1	1	1	1	0	0	0	0	0	0	0	56.972	523	NaN	NaN	NaN	NaN	NaN	NaN	NaN	NaN	156680000	87825000	68853000	156680000	87825000	68853000	0	0	0	0	0	0	0	0	0	0	0	0	0	0	0	0	0	0	0	0	0
SSL2	1	2	2	2	1	1	0	0	0	0	0	0	95.34	843	NaN	NaN	NaN	NaN	NaN	NaN	NaN	NaN	21709000	21709000	0	21709000	21709000	0	0	0	0	0	0	0	0	0	0	0	0	0	0	0	0	0	0	0	0	0	0
BET4	1	1	1	1	1	1	0	0	0	0	0	0	39.674	327	1.0693	NaN	NaN	NaN	NaN	NaN	NaN	NaN	204130000	96532000	107600000	130300000	60835000	69460000	73833000	35697000	38136000	0	0	0	0	0	0	0	0	0	0	0	0	0	0	0	0	0	0
CDC14	1	2	2	2	1	1	1	1	0	0	0	1	61.906	551	NaN	0.81119	NaN	NaN	NaN	NaN	NaN	NaN	396200000	238370000	157820000	46903000	20964000	25940000	151160000	86795000	64360000	103050000	65845000	37204000	87775000	60024000	27751000	0	0	0	0	0	0	0	0	0	7316300	4746100	2570200
PRP38	1	1	1	1	0	1	0	1	0	0	0	0	27.966	242	NaN	NaN	NaN	NaN	NaN	NaN	NaN	NaN	45238000	28055000	17183000	0	0	0	45238000	28055000	17183000	0	0	0	0	0	0	0	0	0	0	0	0	0	0	0	0	0	0
TPS1	1	4	4	4	1	0	0	0	1	1	3	3	56.147	495	0.9924	NaN	NaN	NaN	NaN	NaN	1.3308	1.0467	1225200000	665990000	559190000	938910000	510190000	428720000	0	0	0	0	0	0	0	0	0	834700	544290	290410	17941000	10478000	7462200	148940000	79320000	69622000	118550000	65457000	53098000
SLT2	1	1	1	1	0	0	0	0	0	0	1	1	55.635	484	NaN	NaN	NaN	NaN	NaN	NaN	NaN	NaN	37369000	21574000	15795000	0	0	0	0	0	0	0	0	0	0	0	0	0	0	0	0	0	0	21983000	11548000	10434000	15386000	10026000	5360200
REG1	1	14	14	14	10	5	7	8	0	0	0	0	112.61	1014	0.94699	0.92214	0.92125	0.89996	NaN	NaN	NaN	NaN	4347100000	2383000000	1964200000	1227200000	692890000	534320000	748500000	386780000	361720000	1052500000	581430000	471060000	1318900000	721860000	597040000	0	0	0	0	0	0	0	0	0	0	0	0
CYT2	1	2	2	2	0	0	0	0	1	2	2	2	26.076	224	NaN	NaN	NaN	NaN	NaN	0.88353	1.0985	1.1451	854130000	543090000	311040000	0	0	0	0	0	0	0	0	0	0	0	0	6635500	5342500	1293000	99062000	58612000	40450000	301410000	238710000	62695000	447020000	240420000	206600000
CEG1	1	7	7	7	4	3	2	3	1	0	2	0	52.764	459	0.95725	0.99285	1.1271	1.0769	NaN	NaN	1.5093	NaN	2582200000	1433000000	1149200000	913780000	503730000	410050000	816640000	451130000	365510000	455650000	267490000	188160000	351050000	187210000	163840000	7575900	4124900	3451000	0	0	0	37544000	19343000	18201000	0	0	0
PTA1	1	10	10	10	3	4	5	3	0	0	0	2	88.472	785	0.71481	0.8679	0.83411	1.0253	NaN	NaN	NaN	NaN	1345800000	786730000	559080000	107640000	63303000	44332000	277450000	154770000	122680000	212780000	139800000	72977000	268370000	156360000	112000000	0	0	0	0	0	0	0	0	0	479590000	272490000	207090000
HPC2	1	4	4	4	3	2	2	2	0	0	0	0	67.775	625	0.97159	0.90579	0.75814	1.1422	NaN	NaN	NaN	NaN	3204700000	1219700000	1985000000	2013500000	536540000	1476900000	342690000	194450000	148240000	324300000	183620000	140680000	524230000	305070000	219160000	0	0	0	0	0	0	0	0	0	0	0	0
CTF4	1	4	4	4	3	0	1	1	0	0	0	1	104.42	927	1.1377	NaN	NaN	NaN	NaN	NaN	NaN	NaN	721040000	346920000	374120000	319810000	170750000	149050000	0	0	0	19827000	9185000	10642000	139160000	65129000	74029000	0	0	0	0	0	0	0	0	0	242240000	101850000	140400000
UBP2	1	8	8	8	4	4	4	4	0	0	0	0	146.35	1272	1.0469	1.0215	1.1188	1.1373	NaN	NaN	NaN	NaN	2554600000	1429200000	1125500000	912350000	517510000	394840000	627280000	362730000	264550000	486650000	254710000	231940000	528340000	294210000	234120000	0	0	0	0	0	0	0	0	0	0	0	0
COX12	1	4	4	4	3	3	3	2	0	0	0	0	9.7878	83	1.0979	1.1398	1.1075	0.82443	NaN	NaN	NaN	NaN	6364700000	3223000000	3141800000	3352200000	1756700000	1595500000	2246100000	1104300000	1141800000	524520000	235060000	289470000	241890000	126880000	115000000	0	0	0	0	0	0	0	0	0	0	0	0
CIK1	1	2	2	2	1	0	0	0	0	0	1	0	69.069	594	NaN	NaN	NaN	NaN	NaN	NaN	NaN	NaN	247270000	168650000	78614000	23832000	14341000	9491100	0	0	0	0	0	0	0	0	0	0	0	0	0	0	0	223440000	154310000	69123000	0	0	0
GCR2	1	1	1	1	1	0	0	0	0	0	0	0	58.061	534	NaN	NaN	NaN	NaN	NaN	NaN	NaN	NaN	378170000	221960000	156210000	378170000	221960000	156210000	0	0	0	0	0	0	0	0	0	0	0	0	0	0	0	0	0	0	0	0	0
RPS15	1	3	3	3	2	3	2	2	1	1	2	2	16.002	142	1.0017	1.0115	0.98558	1.0116	NaN	NaN	1.0194	1.0873	98531000000	54042000000	44489000000	26989000000	15332000000	11657000000	30013000000	16017000000	13997000000	19729000000	10654000000	9075200000	19812000000	10865000000	8947200000	166500000	108990000	57505000	95127000	61348000	33779000	797280000	475700000	321580000	928970000	528590000	400380000
RPT6	1	8	8	8	6	4	3	4	0	0	1	2	45.271	405	1.0072	1.077	1.0587	1.2009	NaN	NaN	NaN	0.67131	8717900000	4510100000	4207700000	2660400000	1451700000	1208700000	2037500000	1033500000	1004000000	1867600000	929840000	937770000	2100700000	1064400000	1036400000	0	0	0	0	0	0	27462000	14381000	13081000	24145000	16347000	7797800
YSA1	1	6	6	6	4	4	5	4	0	0	0	1	26.087	231	0.99402	1.0942	1.0201	1.1097	NaN	NaN	NaN	NaN	1842200000	973550000	868700000	299170000	159080000	140100000	436470000	226540000	209940000	609720000	322130000	287590000	486520000	258800000	227720000	0	0	0	0	0	0	0	0	0	10359000	6999300	3359700
MTD1	1	7	7	7	6	4	2	3	0	0	0	0	36.239	320	0.84808	1.2442	0.25995	0.94921	NaN	NaN	NaN	NaN	4608400000	2850700000	1757700000	2579200000	1432400000	1146700000	852650000	442700000	409950000	1052100000	911610000	140460000	124450000	63948000	60504000	0	0	0	0	0	0	0	0	0	0	0	0
SKO1	1	3	3	3	3	1	1	1	0	0	0	0	70.191	647	1.1168	NaN	NaN	NaN	NaN	NaN	NaN	NaN	372020000	196960000	175060000	196810000	100260000	96556000	63130000	36996000	26135000	52561000	26913000	25648000	59515000	32789000	26726000	0	0	0	0	0	0	0	0	0	0	0	0
UBC7	1	3	3	3	1	1	0	0	0	0	2	2	18.52	165	NaN	NaN	NaN	NaN	NaN	NaN	1.0542	1.0026	248160000	158020000	90146000	34379000	18395000	15985000	38485000	21856000	16629000	0	0	0	0	0	0	0	0	0	0	0	0	61910000	43306000	18604000	113390000	74461000	38928000
MET14	1	2	2	2	0	2	2	1	0	0	0	0	23.06	202	NaN	1.0245	1.3583	NaN	NaN	NaN	NaN	NaN	458830000	215100000	243720000	0	0	0	187560000	91754000	95808000	185220000	88850000	96366000	86049000	34498000	51551000	0	0	0	0	0	0	0	0	0	0	0	0
MAK10	1	1	1	1	1	0	0	0	0	0	0	0	84.301	733	NaN	NaN	NaN	NaN	NaN	NaN	NaN	NaN	85309000	45630000	39679000	85309000	45630000	39679000	0	0	0	0	0	0	0	0	0	0	0	0	0	0	0	0	0	0	0	0	0
NUP49	1	2	2	2	1	1	1	1	1	1	2	1	49.142	472	NaN	NaN	NaN	NaN	NaN	1.7308	1.1986	1.0777	2193000000	1195500000	997500000	267460000	154930000	112530000	178650000	95797000	82848000	140050000	78026000	62026000	173330000	86225000	87100000	12150000	4968400	7181300	423990000	206540000	217450000	918900000	527460000	391440000	78469000	41545000	36924000
MEH1	1	3	3	3	1	0	0	0	1	0	3	2	20.242	184	0.92283	NaN	NaN	NaN	NaN	NaN	0.92919	1.0953	2247100000	1342100000	904960000	745190000	456040000	289160000	0	0	0	0	0	0	0	0	0	17162000	10568000	6594000	0	0	0	981240000	611890000	369340000	503480000	263610000	239860000
RSC4	1	9	9	9	6	7	7	3	0	1	0	1	72.29	625	1.0501	1.0026	0.92781	0.91738	NaN	NaN	NaN	NaN	2956400000	1600300000	1356100000	980430000	525410000	455020000	1000000000	523890000	476160000	651170000	361120000	290050000	316690000	184330000	132360000	0	0	0	2494300	811440	1682900	0	0	0	5555800	4761000	794740
YVH1	1	7	7	7	1	2	1	2	0	0	0	2	41.185	364	NaN	1.3604	NaN	0.81939	NaN	NaN	NaN	1.3222	1058200000	518310000	539920000	478090000	234330000	243760000	279500000	115430000	164070000	0	0	0	262180000	150320000	111860000	0	0	0	0	0	0	0	0	0	38452000	18226000	20226000
UTP6	1	7	7	7	4	5	3	3	0	0	2	1	52.418	440	0.9661	0.87878	1.0728	0.87005	NaN	NaN	NaN	NaN	2104900000	1108200000	996750000	860610000	444170000	416450000	638520000	312100000	326420000	186230000	114540000	71695000	389620000	228860000	160760000	0	0	0	0	0	0	20941000	3344700	17596000	8979400	5147900	3831500
TBF1	1	2	2	2	1	1	1	1	0	1	0	0	62.823	562	NaN	NaN	NaN	NaN	NaN	NaN	NaN	NaN	675510000	339900000	335610000	156820000	68727000	88096000	175000000	102150000	72853000	141440000	64636000	76800000	197990000	101970000	96020000	0	0	0	4257800	2416500	1841300	0	0	0	0	0	0
SPP2	1	3	3	3	3	1	1	0	0	0	0	0	20.648	185	1.4651	NaN	NaN	NaN	NaN	NaN	NaN	NaN	451610000	223080000	228520000	236580000	110780000	125800000	35042000	18159000	16883000	179990000	94143000	85846000	0	0	0	0	0	0	0	0	0	0	0	0	0	0	0
CUS1	1	2	2	2	0	1	0	1	0	0	0	0	50.252	436	NaN	NaN	NaN	NaN	NaN	NaN	NaN	NaN	32099000	17602000	14497000	0	0	0	0	0	0	0	0	0	32099000	17602000	14497000	0	0	0	0	0	0	0	0	0	0	0	0
RNT1	1	3	3	3	2	2	0	1	0	0	1	0	54.07	471	1.1687	0.9984	NaN	NaN	NaN	NaN	1.4106	NaN	382710000	217920000	164790000	127710000	71931000	55784000	70953000	40654000	30299000	0	0	0	161980000	91295000	70688000	0	0	0	0	0	0	22055000	14040000	8014400	0	0	0
CTF19	1	1	1	1	1	1	0	0	0	0	0	0	42.782	369	NaN	NaN	NaN	NaN	NaN	NaN	NaN	NaN	400380000	209020000	191370000	201450000	114630000	86819000	198930000	94386000	104550000	0	0	0	0	0	0	0	0	0	0	0	0	0	0	0	0	0	0
RPL21A	1	12	2	2	9	8	9	7	7	8	10	10	18.242	160	0.9405	0.98969	1.0578	0.90835	NaN	NaN	NaN	NaN	13053000000	6924900000	6127600000	9246600000	5017700000	4228800000	1499800000	639620000	860160000	1436200000	754350000	681850000	580860000	318790000	262060000	0	0	0	0	0	0	128030000	99879000	28154000	161080000	94524000	66560000
YPL067C	1	4	4	4	3	2	3	2	0	0	0	0	22.776	198	0.39486	NaN	1.0811	NaN	NaN	NaN	NaN	NaN	913450000	587770000	325670000	555820000	427170000	128650000	127680000	51609000	76070000	172870000	83297000	89572000	57082000	25698000	31384000	0	0	0	0	0	0	0	0	0	0	0	0
CWC27	1	1	1	1	0	0	1	1	0	0	0	0	35.025	301	NaN	NaN	NaN	NaN	NaN	NaN	NaN	NaN	112950000	65907000	47047000	0	0	0	0	0	0	63581000	36201000	27380000	49372000	29705000	19667000	0	0	0	0	0	0	0	0	0	0	0	0
PET117	1	2	2	2	0	1	1	0	1	0	1	1	12.281	107	NaN	NaN	NaN	NaN	NaN	NaN	NaN	NaN	210310000	125580000	84732000	0	0	0	67044000	35359000	31685000	47303000	29398000	17905000	0	0	0	14135000	9633200	4501400	0	0	0	43429000	26451000	16978000	38399000	24736000	13663000
PET191	1	2	2	2	2	1	1	1	0	0	0	0	12.394	108	0.78932	0.9896	NaN	NaN	NaN	NaN	NaN	NaN	1345000000	757680000	587290000	312200000	192060000	120140000	351350000	199770000	151580000	275950000	144450000	131500000	405470000	221400000	184070000	0	0	0	0	0	0	0	0	0	0	0	0
RPM2	1	7	7	7	0	0	1	1	0	2	4	3	139.35	1202	NaN	NaN	NaN	NaN	NaN	0.6559	0.89093	1.2105	362080000	217760000	144310000	0	0	0	0	0	0	51769000	34741000	17028000	37610000	18602000	19008000	0	0	0	17213000	12023000	5189600	194000000	123500000	70507000	61484000	28902000	32582000
SLU7	1	2	2	2	2	2	2	1	0	0	0	0	44.636	382	NaN	NaN	NaN	NaN	NaN	NaN	NaN	NaN	230010000	133970000	96044000	53045000	38743000	14302000	53409000	26470000	26939000	63670000	35258000	28412000	59887000	33497000	26390000	0	0	0	0	0	0	0	0	0	0	0	0
GRX5	1	6	6	6	5	3	2	1	0	1	0	1	16.931	150	1.0301	0.90847	0.62369	NaN	NaN	NaN	NaN	NaN	9725000000	5641500000	4083500000	3898800000	2190800000	1708000000	3968200000	2273300000	1694800000	1762000000	1111200000	650820000	56590000	41852000	14738000	0	0	0	1849900	1100900	749030	0	0	0	37630000	23198000	14432000
RAT1	1	9	9	9	6	3	2	3	0	0	2	0	115.93	1006	1.027	1.0638	1.1845	0.8914	NaN	NaN	1.2774	NaN	1521900000	802370000	719560000	910720000	487750000	422980000	192340000	100200000	92141000	192890000	98997000	93894000	215450000	110360000	105090000	0	0	0	0	0	0	10519000	5064400	5454700	0	0	0
SKI8	1	5	5	5	3	1	2	3	0	0	0	0	44.231	397	0.97958	NaN	NaN	1.2142	NaN	NaN	NaN	NaN	831750000	482400000	349350000	255950000	148050000	107900000	144660000	85230000	59427000	146500000	91723000	54776000	284640000	157400000	127250000	0	0	0	0	0	0	0	0	0	0	0	0
LGE1	1	3	3	3	3	2	2	2	0	0	0	0	37.309	332	1.0133	NaN	0.87259	0.9015	NaN	NaN	NaN	NaN	915220000	505680000	409540000	463770000	257040000	206730000	96094000	40292000	55802000	213190000	129070000	84119000	142160000	79275000	62887000	0	0	0	0	0	0	0	0	0	0	0	0
ARL3	1	2	2	2	0	0	0	0	0	0	0	2	22.782	198	NaN	NaN	NaN	NaN	NaN	NaN	NaN	0.8431	108820000	70370000	38449000	0	0	0	0	0	0	0	0	0	0	0	0	0	0	0	0	0	0	0	0	0	108820000	70370000	38449000
ROD1	1	1	1	1	1	1	0	0	0	0	0	0	92.348	837	NaN	NaN	NaN	NaN	NaN	NaN	NaN	NaN	210440000	105550000	104880000	141220000	66234000	74988000	69214000	39319000	29895000	0	0	0	0	0	0	0	0	0	0	0	0	0	0	0	0	0	0
SEN54	1	4	4	4	0	1	1	0	1	2	3	2	54.648	467	NaN	NaN	NaN	NaN	NaN	0.86672	0.8661	1.7527	161130000	53105000	108020000	0	0	0	12274000	6400900	5872900	47382000	5961600	41421000	0	0	0	2153400	1446000	707360	10839000	6723100	4115700	66181000	22545000	43636000	22300000	10028000	12272000
UBP16	1	4	4	4	2	1	0	0	1	0	0	2	56.919	499	0.92687	NaN	NaN	NaN	NaN	NaN	NaN	0.83106	223550000	128390000	95156000	171080000	94337000	76747000	0	0	0	0	0	0	0	0	0	33181000	24317000	8863500	0	0	0	0	0	0	19283000	9736700	9545800
YPL108W	1	1	1	1	1	0	0	0	0	0	0	0	19.818	168	NaN	NaN	NaN	NaN	NaN	NaN	NaN	NaN	106510000	69082000	37431000	106510000	69082000	37431000	0	0	0	0	0	0	0	0	0	0	0	0	0	0	0	0	0	0	0	0	0
YPL107W	1	3	3	3	0	0	0	0	1	1	1	1	28.569	248	NaN	NaN	NaN	NaN	NaN	NaN	NaN	NaN	37929000	24196000	13733000	0	0	0	0	0	0	0	0	0	0	0	0	10225000	6322700	3901800	1095400	715560	379870	13785000	9965400	3819800	12824000	7192500	5631600
SYH1	1	12	12	12	6	6	7	8	1	0	0	2	94.355	849	0.86265	0.95761	0.99788	0.92556	NaN	NaN	NaN	0.75605	8130000000	4578600000	3551400000	3443300000	2083600000	1359700000	1987200000	1041800000	945390000	1742500000	903690000	838860000	824510000	473220000	351290000	26520000	15634000	10886000	0	0	0	0	0	0	105880000	60622000	45261000
FMP30	1	2	2	2	1	2	0	0	0	0	0	1	54.367	468	NaN	0.92908	NaN	NaN	NaN	NaN	NaN	NaN	312770000	187860000	124910000	36899000	24581000	12318000	187470000	103040000	84438000	0	0	0	0	0	0	0	0	0	0	0	0	0	0	0	88394000	60243000	28151000
ELP4	1	3	3	3	2	1	1	2	0	0	0	0	51.155	456	1.2919	NaN	NaN	1.204	NaN	NaN	NaN	NaN	1253900000	647850000	606090000	394660000	197070000	197590000	256370000	134740000	121630000	277620000	153070000	124550000	325300000	162980000	162320000	0	0	0	0	0	0	0	0	0	0	0	0
INA17	1	3	3	3	0	0	0	0	0	2	3	3	21.842	182	NaN	NaN	NaN	NaN	NaN	1.1295	0.9127	1.0829	499810000	308100000	191720000	0	0	0	0	0	0	0	0	0	0	0	0	0	0	0	57693000	33130000	24563000	293980000	189740000	104240000	148140000	85224000	62919000
ELP3	1	4	4	4	2	2	1	1	0	0	1	0	63.656	557	1.528	0.98027	NaN	NaN	NaN	NaN	NaN	NaN	2899100000	1767200000	1131900000	351400000	174070000	177330000	182470000	89890000	92580000	0	0	0	0	0	0	0	0	0	0	0	0	2365200000	1503300000	861960000	0	0	0
KAP120	1	2	2	2	2	1	2	0	0	0	0	0	119.62	1032	1.0434	NaN	0.96269	NaN	NaN	NaN	NaN	NaN	382430000	204190000	178230000	270710000	147250000	123450000	0	0	0	111720000	56939000	54781000	0	0	0	0	0	0	0	0	0	0	0	0	0	0	0
TFB2	1	2	2	2	1	0	0	1	0	0	0	0	58.534	513	NaN	NaN	NaN	NaN	NaN	NaN	NaN	NaN	165510000	70797000	94716000	136680000	70797000	65887000	0	0	0	0	0	0	28829000	0	28829000	0	0	0	0	0	0	0	0	0	0	0	0
MRP51	1	9	9	9	0	0	0	0	1	8	6	5	39.445	344	NaN	NaN	NaN	NaN	NaN	1.0059	0.91345	0.83949	816670000	491420000	325250000	0	0	0	0	0	0	0	0	0	0	0	0	15386000	12891000	2494600	203680000	128020000	75666000	338200000	209040000	129160000	259400000	141470000	117930000
HOS3	1	4	4	4	1	2	0	0	0	1	0	1	79.199	697	NaN	NaN	NaN	NaN	NaN	NaN	NaN	NaN	229030000	132210000	96818000	152990000	86687000	66300000	59326000	32327000	26998000	0	0	0	0	0	0	0	0	0	8002700	7200200	802510	0	0	0	8714700	5997900	2716800
UME1	1	7	7	7	2	1	2	0	0	1	1	3	51.021	460	2.9631	NaN	NaN	NaN	NaN	NaN	NaN	1.0013	824000000	289710000	534290000	536490000	129630000	406860000	158440000	94957000	63481000	86885000	41500000	45385000	0	0	0	0	0	0	8974200	3975900	4998300	5683200	2478900	3204400	27531000	17175000	10356000
SPP1	1	2	2	2	2	0	0	0	0	0	0	0	41.468	353	1.1332	NaN	NaN	NaN	NaN	NaN	NaN	NaN	214700000	111550000	103150000	214700000	111550000	103150000	0	0	0	0	0	0	0	0	0	0	0	0	0	0	0	0	0	0	0	0	0
GIP3	1	10	10	9	5	4	5	4	0	0	1	3	140.89	1276	1.015	0.94636	1.0102	1.0127	NaN	NaN	NaN	1.116	2776800000	1618200000	1158600000	647470000	213560000	433910000	845040000	624410000	220630000	779230000	514880000	264350000	488820000	254840000	233990000	0	0	0	0	0	0	0	0	0	16286000	10557000	5729100
ISU1	1	4	4	2	3	2	2	1	0	0	1	2	17.895	165	0.77362	NaN	0.73347	NaN	NaN	NaN	NaN	0.95642	828040000	494670000	333370000	250130000	141910000	108220000	159240000	102660000	56576000	252520000	149090000	103430000	131940000	80781000	51156000	0	0	0	0	0	0	7799900	4881500	2918500	26411000	15345000	11065000
ODC1	1	1	1	1	0	0	0	0	0	1	1	0	34.206	310	NaN	NaN	NaN	NaN	NaN	NaN	NaN	NaN	29753000	13966000	15787000	0	0	0	0	0	0	0	0	0	0	0	0	0	0	0	4841800	2893100	1948700	24911000	11073000	13838000	0	0	0
FDC1	1	3	3	3	0	1	1	2	0	0	0	0	56.163	503	NaN	NaN	NaN	NaN	NaN	NaN	NaN	NaN	284960000	143340000	141620000	0	0	0	14053000	5913100	8140000	154010000	78016000	75991000	116900000	59410000	57493000	0	0	0	0	0	0	0	0	0	0	0	0
DIG1	1	2	2	2	2	0	2	2	0	0	0	0	49.356	452	0.39225	NaN	0.65046	0.70787	NaN	NaN	NaN	NaN	758910000	520040000	238870000	15178000	10943000	4235600	0	0	0	388020000	258130000	129890000	355720000	250970000	104740000	0	0	0	0	0	0	0	0	0	0	0	0
ELC1	1	1	1	1	0	0	0	1	0	0	0	0	11.328	99	NaN	NaN	NaN	NaN	NaN	NaN	NaN	NaN	32015000	17076000	14939000	0	0	0	0	0	0	0	0	0	32015000	17076000	14939000	0	0	0	0	0	0	0	0	0	0	0	0
MET31	1	2	2	2	2	1	1	0	0	0	0	0	19.557	177	0.99733	NaN	NaN	NaN	NaN	NaN	NaN	NaN	2810600000	1412600000	1398000000	1067700000	580340000	487390000	825720000	421640000	404080000	917110000	410610000	506500000	0	0	0	0	0	0	0	0	0	0	0	0	0	0	0
SVL3	1	8	8	8	7	5	3	1	1	0	2	2	92.143	825	1.0625	0.98138	0.85901	1.0037	NaN	NaN	1.004	0.61277	2621000000	1488300000	1132700000	1390400000	789410000	601000000	783840000	418810000	365030000	276390000	169470000	106920000	60341000	35396000	24945000	4408600	2403000	2005600	0	0	0	42196000	27826000	14369000	63397000	44990000	18407000
	1	7	7	7	3	4	5	3	1	1	1	0	39.976	365	1.207	0.91206	0.9677	1.1057	NaN	NaN	NaN	NaN	4753100000	2441300000	2311800000	1721400000	892360000	829030000	1018100000	552040000	466020000	1397600000	676260000	721360000	594950000	308640000	286310000	0	0	0	11109000	7104600	4004400	9954400	4887200	5067300	0	0	0
RSC9	1	8	8	8	5	3	2	2	0	3	1	1	65.217	581	1.0777	0.92871	0.88973	0.68722	NaN	2.2933	NaN	NaN	3879800000	2127800000	1752000000	1303600000	682300000	621330000	1022400000	543030000	479330000	598700000	325590000	273100000	772240000	478440000	293800000	0	0	0	78283000	34293000	43990000	5417000	3115800	2301200	99174000	60992000	38182000
MTG1	1	2	2	2	0	0	0	0	0	0	1	2	42.144	367	NaN	NaN	NaN	NaN	NaN	NaN	NaN	0.95675	68557000	40490000	28067000	0	0	0	0	0	0	0	0	0	0	0	0	0	0	0	0	0	0	3851900	3158400	693560	64705000	37332000	27373000
ATP25	1	4	4	4	0	0	0	0	0	2	3	1	70.413	612	NaN	NaN	NaN	NaN	NaN	1.1211	0.9842	NaN	136950000	76947000	60007000	0	0	0	0	0	0	0	0	0	0	0	0	0	0	0	18079000	9952900	8125700	91259000	50678000	40581000	27617000	16317000	11301000
PIR1	1	4	2	2	2	3	2	2	1	0	0	0	34.621	341	NaN	0.41929	NaN	NaN	NaN	NaN	NaN	NaN	333560000	206070000	127480000	106220000	74899000	31323000	142120000	83375000	58749000	36898000	19634000	17264000	48313000	28164000	20148000	0	0	0	0	0	0	0	0	0	0	0	0
	1	5	5	5	4	4	4	2	0	0	0	0	31.144	274	0.98567	1.0324	1.0498	1.01	NaN	NaN	NaN	NaN	3000300000	1628000000	1372300000	887890000	464970000	422920000	856710000	476220000	380490000	598220000	331950000	266270000	657490000	354850000	302640000	0	0	0	0	0	0	0	0	0	0	0	0
ADD37	1	1	1	1	0	0	0	1	0	0	0	0	22.109	198	NaN	NaN	NaN	NaN	NaN	NaN	NaN	NaN	19581000	6156000	13425000	0	0	0	0	0	0	0	0	0	19581000	6156000	13425000	0	0	0	0	0	0	0	0	0	0	0	0
MRPS17	1	9	9	9	1	2	2	1	2	6	9	7	27.635	237	NaN	NaN	0.80657	NaN	NaN	1.0241	0.93645	0.85768	2979100000	1744600000	1234400000	50094000	0	50094000	179310000	94550000	84763000	273280000	156970000	116310000	0	0	0	0	0	0	226660000	129290000	97366000	1990900000	1217000000	773870000	258830000	146790000	112040000
FCP1	1	4	4	4	2	3	3	3	0	0	0	0	83.44	732	0.96894	1.0023	1.2614	1.0936	NaN	NaN	NaN	NaN	2511500000	1361500000	1150000000	740290000	417850000	322440000	908100000	476100000	432000000	176160000	95607000	80556000	686980000	371940000	315050000	0	0	0	0	0	0	0	0	0	0	0	0
PRM15	1	9	9	9	7	6	3	6	0	1	0	0	71.068	622	1.4738	0.99884	1.4737	1.0388	NaN	NaN	NaN	NaN	3202500000	1669900000	1532600000	1534200000	730510000	803680000	676620000	353980000	322640000	243560000	128130000	115430000	746590000	456380000	290210000	0	0	0	1533300	925700	607560	0	0	0	0	0	0
NGL2	1	3	3	3	3	3	3	3	0	0	0	0	59.539	515	0.89759	0.89086	1.0208	0.9689	NaN	NaN	NaN	NaN	2108300000	1152600000	955710000	505950000	242590000	263360000	488970000	277090000	211880000	552520000	303520000	249000000	560840000	329370000	231470000	0	0	0	0	0	0	0	0	0	0	0	0
TOM1	1	4	4	4	2	0	2	2	0	0	0	0	374.18	3268	NaN	NaN	NaN	NaN	NaN	NaN	NaN	NaN	117210000	60984000	56225000	75202000	34132000	41070000	0	0	0	42007000	26852000	15154000	0	0	0	0	0	0	0	0	0	0	0	0	0	0	0
TFB3	1	2	2	2	0	1	2	1	0	0	0	0	38.128	321	NaN	NaN	NaN	NaN	NaN	NaN	NaN	NaN	156800000	91669000	65132000	0	0	0	65005000	30336000	34669000	49864000	32658000	17206000	41932000	28675000	13257000	0	0	0	0	0	0	0	0	0	0	0	0
RMT2	1	2	2	2	2	1	1	2	0	0	0	0	47.469	412	0.93181	1.2136	NaN	0.99149	NaN	NaN	NaN	NaN	2500700000	1364600000	1136100000	1959600000	1095500000	864130000	375320000	174190000	201130000	88617000	53979000	34638000	77185000	40983000	36202000	0	0	0	0	0	0	0	0	0	0	0	0
SDC1	1	2	2	2	2	1	1	1	0	0	0	0	19.446	175	0.90677	NaN	NaN	NaN	NaN	NaN	NaN	NaN	948310000	550820000	397490000	658150000	383740000	274410000	100250000	54962000	45285000	97745000	58727000	39018000	92166000	53396000	38770000	0	0	0	0	0	0	0	0	0	0	0	0
UGO1	1	1	1	1	0	0	0	0	0	0	1	0	57.542	502	NaN	NaN	NaN	NaN	NaN	NaN	NaN	NaN	0	0	0	0	0	0	0	0	0	0	0	0	0	0	0	0	0	0	0	0	0	0	0	0	0	0	0
GCN5	1	6	6	6	5	3	2	4	0	0	0	0	51.069	439	1.0495	0.7637	NaN	0.71281	NaN	NaN	NaN	NaN	1397100000	821760000	575360000	549630000	309250000	240380000	326000000	216450000	109550000	103900000	56948000	46950000	417610000	239120000	178490000	0	0	0	0	0	0	0	0	0	0	0	0
TRS31	1	3	3	3	1	2	1	2	1	0	0	1	31.721	283	NaN	0.88246	NaN	0.80944	NaN	NaN	NaN	NaN	616730000	344160000	272580000	90627000	55066000	35561000	220330000	113430000	106910000	114460000	66819000	47642000	173970000	96467000	77499000	10940000	7829900	3110300	0	0	0	0	0	0	6408500	4549700	1858900
PRP3	1	1	1	1	0	0	0	1	0	0	0	0	55.87	469	NaN	NaN	NaN	NaN	NaN	NaN	NaN	NaN	147870000	93996000	53875000	0	0	0	0	0	0	0	0	0	147870000	93996000	53875000	0	0	0	0	0	0	0	0	0	0	0	0
PEX29	1	1	1	1	0	0	0	1	1	0	1	1	63.542	554	NaN	NaN	NaN	NaN	NaN	NaN	NaN	NaN	113920000	60131000	53790000	0	0	0	0	0	0	0	0	0	52145000	25101000	27044000	12023000	7795300	4228100	0	0	0	26145000	14118000	12027000	23608000	13117000	10490000
VPS72	1	1	1	1	1	0	0	0	0	0	0	0	90.579	795	1.0714	NaN	NaN	NaN	NaN	NaN	NaN	NaN	309720000	166610000	143110000	309720000	166610000	143110000	0	0	0	0	0	0	0	0	0	0	0	0	0	0	0	0	0	0	0	0	0
VPS60	1	1	1	1	1	1	0	0	0	0	0	0	25.861	229	1.067	NaN	NaN	NaN	NaN	NaN	NaN	NaN	120000000	54652000	65350000	111400000	49344000	62055000	8603400	5308300	3295000	0	0	0	0	0	0	0	0	0	0	0	0	0	0	0	0	0	0
SLD5	1	4	4	4	4	1	1	0	0	0	0	0	33.947	294	1.0486	NaN	NaN	NaN	NaN	NaN	NaN	NaN	372450000	185410000	187040000	187260000	91082000	96182000	113120000	58498000	54621000	72066000	35830000	36236000	0	0	0	0	0	0	0	0	0	0	0	0	0	0	0
PKH1	1	3	3	3	1	1	0	2	0	0	0	0	86.251	766	NaN	NaN	NaN	1.4804	NaN	NaN	NaN	NaN	447210000	217820000	229380000	107410000	53972000	53437000	100660000	54252000	46407000	0	0	0	239140000	109600000	129540000	0	0	0	0	0	0	0	0	0	0	0	0
TY1B-ML2;TY1B-OL;TY1B-JR1;TY1B-A	4	48	1	0	31	29	27	22	23	14	24	27	198.57	1755	0.97968	0.76103	0.68777	NaN	NaN	NaN	NaN	0.90836	3445500000	2051200000	1394300000	1666800000	957620000	709160000	959490000	592380000	367110000	699860000	427240000	272620000	0	0	0	15181000	10050000	5130500	0	0	0	49260000	29479000	19781000	54918000	34421000	20496000
NHP10	1	3	3	3	2	2	2	3	0	0	0	0	23.857	203	0.98271	0.93522	0.96472	0.96704	NaN	NaN	NaN	NaN	2340300000	1352900000	987430000	453550000	258930000	194620000	519620000	295890000	223740000	510750000	287910000	222840000	856380000	510140000	346240000	0	0	0	0	0	0	0	0	0	0	0	0
EBS1	1	3	3	3	2	0	1	1	1	0	1	0	99.999	884	NaN	NaN	NaN	NaN	NaN	NaN	NaN	NaN	473740000	285810000	187930000	360670000	213590000	147070000	0	0	0	0	0	0	61790000	42754000	19036000	15475000	10420000	5054200	0	0	0	35813000	19044000	16769000	0	0	0
	1	1	1	1	0	0	0	0	1	1	1	1	8.5705	75	NaN	NaN	NaN	NaN	NaN	NaN	NaN	NaN	65103000	37755000	27349000	0	0	0	0	0	0	0	0	0	0	0	0	9305900	5110700	4195200	8031800	4758600	3273200	31715000	18060000	13655000	16051000	9825900	6224900
TRM732	1	3	3	3	2	2	2	2	0	0	0	0	163.58	1420	1.0139	NaN	0.79783	0.97796	NaN	NaN	NaN	NaN	12788000000	7071300000	5716500000	7962000000	4385500000	3576500000	3039400000	1679300000	1360100000	605990000	350540000	255450000	1180400000	656020000	524390000	0	0	0	0	0	0	0	0	0	0	0	0
STE20	1	7	7	7	5	4	5	5	0	0	0	0	102.36	939	0.97243	1.0688	1.011	1.0247	NaN	NaN	NaN	NaN	2246300000	1219800000	1026500000	615020000	343350000	271660000	593330000	308830000	284490000	587290000	327870000	259420000	450670000	239790000	210880000	0	0	0	0	0	0	0	0	0	0	0	0
TMA23	1	2	2	2	1	1	2	2	1	0	1	0	23.949	211	NaN	NaN	0.66787	0.76182	NaN	NaN	NaN	NaN	1251700000	728450000	523240000	274210000	151460000	122740000	263070000	140090000	122980000	380940000	235000000	145940000	328420000	197880000	130540000	5048500	4017400	1031100	0	0	0	0	0	0	0	0	0
TDA1	1	1	1	1	1	0	1	1	0	0	0	0	66.219	586	NaN	NaN	NaN	NaN	NaN	NaN	NaN	NaN	359730000	189680000	170050000	111930000	59415000	52516000	0	0	0	146080000	81804000	64275000	101720000	48465000	53259000	0	0	0	0	0	0	0	0	0	0	0	0
GOT1	1	1	1	1	0	0	0	0	1	0	0	0	15.431	138	NaN	NaN	NaN	NaN	NaN	NaN	NaN	NaN	0	0	0	0	0	0	0	0	0	0	0	0	0	0	0	0	0	0	0	0	0	0	0	0	0	0	0
HER2	1	1	1	1	0	0	0	0	0	1	0	0	50.918	464	NaN	NaN	NaN	NaN	NaN	NaN	NaN	NaN	0	0	0	0	0	0	0	0	0	0	0	0	0	0	0	0	0	0	0	0	0	0	0	0	0	0	0
YML079W	1	1	1	1	1	0	0	0	0	0	0	0	22.461	201	NaN	NaN	NaN	NaN	NaN	NaN	NaN	NaN	170170000	93702000	76468000	170170000	93702000	76468000	0	0	0	0	0	0	0	0	0	0	0	0	0	0	0	0	0	0	0	0	0
	1	3	3	3	1	1	1	1	1	1	2	2	51.437	449	NaN	NaN	NaN	NaN	NaN	NaN	1.0851	0.93178	400400000	233720000	166670000	60675000	18640000	42035000	43680000	43680000	0	58273000	35394000	22879000	69708000	35430000	34278000	43358000	28161000	15197000	17463000	10459000	7004400	55950000	36477000	19474000	51289000	25485000	25803000
CEF1	1	4	4	4	2	1	1	1	0	0	0	0	67.73	590	0.48428	NaN	NaN	NaN	NaN	NaN	NaN	NaN	816960000	523780000	293190000	641290000	435480000	205810000	32562000	17078000	15484000	65563000	35225000	30337000	77551000	35995000	41556000	0	0	0	0	0	0	0	0	0	0	0	0
SKY1	1	7	7	7	4	2	2	4	0	1	1	1	83.237	742	1.014	1.2599	0.92837	1.0353	NaN	NaN	NaN	NaN	1116000000	639660000	476370000	219870000	124270000	95598000	185620000	93896000	91723000	206890000	119670000	87222000	436990000	262450000	174540000	0	0	0	7379100	5095800	2283300	33184000	23584000	9599800	26092000	10687000	15405000
ESC1	1	9	9	9	4	6	3	2	0	0	0	0	187.14	1658	1.044	0.79491	0.94524	0.96212	NaN	NaN	NaN	NaN	1275300000	727790000	547520000	390620000	223760000	166860000	341940000	222130000	119800000	396990000	202040000	194950000	145770000	79859000	65908000	0	0	0	0	0	0	0	0	0	0	0	0
AIM34	1	1	1	1	0	0	0	0	0	0	1	1	22.741	198	NaN	NaN	NaN	NaN	NaN	NaN	NaN	NaN	103640000	57044000	46600000	0	0	0	0	0	0	0	0	0	0	0	0	0	0	0	0	0	0	47843000	28693000	19150000	55801000	28351000	27450000
PLB2	1	1	1	1	0	0	0	0	1	1	0	0	75.455	706	NaN	NaN	NaN	NaN	NaN	0.80904	NaN	NaN	7577900	5131800	2446100	0	0	0	0	0	0	0	0	0	0	0	0	2896900	2088100	808880	4681000	3043700	1637300	0	0	0	0	0	0
ADI1	1	5	5	5	5	3	2	3	0	0	0	0	20.879	179	1.1514	1.6551	1.2363	1.2886	NaN	NaN	NaN	NaN	6342600000	3254900000	3087700000	2972300000	1617600000	1354700000	1386000000	652510000	733480000	1118500000	582120000	536410000	865780000	402650000	463130000	0	0	0	0	0	0	0	0	0	0	0	0
YMD8	1	1	1	1	0	0	0	0	0	0	1	1	49.614	442	NaN	NaN	NaN	NaN	NaN	NaN	NaN	NaN	0	0	0	0	0	0	0	0	0	0	0	0	0	0	0	0	0	0	0	0	0	0	0	0	0	0	0
CCE1	1	1	1	1	0	0	0	0	0	0	1	0	41	353	NaN	NaN	NaN	NaN	NaN	NaN	NaN	NaN	22604000	12664000	9940100	0	0	0	0	0	0	0	0	0	0	0	0	0	0	0	0	0	0	22604000	12664000	9940100	0	0	0
YML018C	1	2	2	2	0	0	0	0	2	1	0	0	43.748	393	NaN	NaN	NaN	NaN	NaN	NaN	NaN	NaN	85857000	51980000	33876000	0	0	0	0	0	0	0	0	0	0	0	0	85857000	51980000	33876000	0	0	0	0	0	0	0	0	0
NAB6	1	3	3	3	1	1	1	2	0	0	1	0	126.14	1134	NaN	NaN	NaN	NaN	NaN	NaN	NaN	NaN	1132500000	852260000	280210000	479970000	387190000	92782000	397970000	325860000	72115000	121350000	63096000	58254000	117500000	68653000	48847000	0	0	0	0	0	0	15680000	7467000	8212500	0	0	0
TAF8	1	3	3	3	1	1	1	0	0	0	0	0	57.985	510	NaN	NaN	NaN	NaN	NaN	NaN	NaN	NaN	242150000	151790000	90357000	138640000	87192000	51448000	43404000	24827000	18578000	60104000	39773000	20331000	0	0	0	0	0	0	0	0	0	0	0	0	0	0	0
	1	2	2	2	1	1	0	0	0	0	0	0	12.339	105	NaN	NaN	NaN	NaN	NaN	NaN	NaN	NaN	367070000	202000000	165070000	169900000	104350000	65547000	197170000	97646000	99520000	0	0	0	0	0	0	0	0	0	0	0	0	0	0	0	0	0	0
TAF12	1	11	11	11	8	5	6	6	1	2	0	3	61.072	539	1.0089	0.94987	0.98842	0.9251	NaN	1.2729	NaN	0.67782	4011000000	2194800000	1816200000	1587300000	830460000	756830000	773810000	450020000	323790000	850200000	452440000	397760000	735040000	420220000	314820000	5206000	3534800	1671200	7542600	3791300	3751200	0	0	0	51914000	34324000	17590000
EKI1	1	1	1	1	1	0	0	0	0	0	0	0	61.656	534	NaN	NaN	NaN	NaN	NaN	NaN	NaN	NaN	77049000	45650000	31399000	77049000	45650000	31399000	0	0	0	0	0	0	0	0	0	0	0	0	0	0	0	0	0	0	0	0	0
GIR2	1	5	5	5	2	4	1	1	0	2	1	1	31.03	265	1.0232	0.95999	0.96581	1.0869	NaN	NaN	NaN	NaN	1895200000	1004100000	891170000	667180000	370660000	296520000	555920000	293640000	262290000	365370000	195690000	169680000	284040000	136110000	147930000	0	0	0	10836000	2046300	8789200	0	0	0	11893000	5930400	5962300
ENT5	1	5	5	5	4	3	3	2	1	1	1	1	47.321	411	1.2291	1.0211	0.91456	NaN	NaN	NaN	NaN	NaN	2798800000	2045000000	753750000	617080000	315640000	301440000	983350000	768940000	214410000	1008200000	842990000	165170000	166130000	97680000	68455000	6693500	6693500	0	3277600	2131600	1146100	7819300	6347200	1472100	6282800	4627700	1655100
YDR161W	1	5	5	5	5	3	3	2	0	0	0	1	42.942	387	0.88025	0.91544	0.95139	1.6282	NaN	NaN	NaN	NaN	7695500000	4222500000	3472900000	2290500000	1280800000	1009700000	2307600000	1336900000	970680000	1337300000	603920000	733390000	1731000000	983170000	747810000	0	0	0	0	0	0	0	0	0	29063000	17732000	11331000
CWC15	1	6	6	6	5	3	2	0	0	0	0	0	19.935	175	1.0758	0.95224	1.1474	NaN	NaN	NaN	NaN	NaN	1206800000	676960000	529810000	541770000	325900000	215870000	407110000	213860000	193240000	257900000	137200000	120700000	0	0	0	0	0	0	0	0	0	0	0	0	0	0	0
TRM82	1	5	5	5	5	4	3	2	0	0	0	0	50.487	444	0.92458	0.8396	0.87922	1.3332	NaN	NaN	NaN	NaN	4786000000	2763200000	2022800000	1971000000	1152300000	818790000	1442600000	833730000	608860000	969070000	590180000	378880000	403330000	187060000	216270000	0	0	0	0	0	0	0	0	0	0	0	0
FMN1	1	2	2	2	0	0	0	0	1	0	2	2	24.537	218	NaN	NaN	NaN	NaN	NaN	NaN	1.2761	1.1708	47560000	27897000	19662000	0	0	0	0	0	0	0	0	0	0	0	0	1407600	769670	637940	0	0	0	22947000	14073000	8874000	23206000	13055000	10150000
YDR248C	1	5	5	5	3	3	4	4	0	0	0	0	22.174	193	0.99499	0.95963	1.029	1.0829	NaN	NaN	NaN	NaN	1124300000	578840000	545440000	283690000	145960000	137720000	233140000	121620000	111520000	191430000	98107000	93320000	416030000	213150000	202880000	0	0	0	0	0	0	0	0	0	0	0	0
RIM13	1	1	1	1	0	0	0	0	0	1	0	0	83.123	727	NaN	NaN	NaN	NaN	NaN	NaN	NaN	NaN	15386000	8934600	6451400	0	0	0	0	0	0	0	0	0	0	0	0	0	0	0	15386000	8934600	6451400	0	0	0	0	0	0
MRPS8	1	5	5	5	1	1	1	1	1	4	4	4	17.47	155	NaN	NaN	NaN	NaN	NaN	1.3254	0.90348	0.90614	1333800000	803890000	529920000	117720000	72163000	45554000	90790000	53978000	36812000	0	0	0	80684000	50031000	30654000	85913000	48888000	37024000	148790000	91297000	57495000	412420000	245860000	166560000	397490000	241670000	155810000
MSH6	1	6	6	6	3	1	1	1	0	0	0	0	140.08	1242	0.95131	NaN	NaN	NaN	NaN	NaN	NaN	NaN	1938000000	1465300000	472720000	886750000	542390000	344370000	50183000	30013000	20170000	0	0	0	1001000000	892870000	108180000	0	0	0	0	0	0	0	0	0	0	0	0
GRX3	1	2	2	2	2	2	1	1	1	1	1	1	28.261	250	NaN	NaN	NaN	NaN	NaN	NaN	NaN	NaN	128320000	66219000	62100000	62617000	32383000	30234000	65703000	33836000	31867000	0	0	0	0	0	0	0	0	0	0	0	0	0	0	0	0	0	0
SPO71	1	2	2	2	1	0	1	0	0	0	0	0	145.18	1245	NaN	NaN	NaN	NaN	NaN	NaN	NaN	NaN	1004500000	398420000	606030000	7699400	5334300	2365100	0	0	0	996760000	393090000	603670000	0	0	0	0	0	0	0	0	0	0	0	0	0	0	0
SPC19	1	2	2	2	2	2	2	1	0	0	0	0	18.909	165	0.9864	0.88969	1.0089	NaN	NaN	NaN	NaN	NaN	514960000	296100000	218860000	167460000	99205000	68255000	144570000	74185000	70383000	109330000	65032000	44299000	93604000	57682000	35922000	0	0	0	0	0	0	0	0	0	0	0	0
CTK1	1	1	1	1	1	0	0	0	0	0	0	0	60.5	528	1.0238	NaN	NaN	NaN	NaN	NaN	NaN	NaN	319680000	182000000	137670000	319680000	182000000	137670000	0	0	0	0	0	0	0	0	0	0	0	0	0	0	0	0	0	0	0	0	0
HMO1	1	9	9	9	8	7	7	8	1	7	4	7	27.544	246	1.0456	1.0266	0.99444	1.0651	NaN	1.9972	1.324	0.89508	41126000000	23181000000	17945000000	14128000000	8130800000	5996900000	8856400000	5089100000	3767300000	8043500000	4565600000	3477900000	8522100000	4545900000	3976200000	23747000	17573000	6174100	729920000	322030000	407890000	236130000	132570000	103560000	586790000	377800000	208990000
	1	2	2	2	0	0	0	0	1	1	0	0	53.729	463	NaN	NaN	NaN	NaN	NaN	NaN	NaN	NaN	41870000	28591000	13279000	0	0	0	0	0	0	0	0	0	0	0	0	6617700	3721500	2896100	35252000	24869000	10383000	0	0	0	0	0	0
ATC1	1	1	1	1	0	1	1	1	0	0	0	0	33.114	294	NaN	NaN	NaN	NaN	NaN	NaN	NaN	NaN	58808000	36374000	22433000	0	0	0	29905000	17727000	12178000	16335000	11278000	5056700	12568000	7369200	5198500	0	0	0	0	0	0	0	0	0	0	0	0
YDR186C	1	2	2	2	2	0	0	0	0	0	0	0	98.33	877	NaN	NaN	NaN	NaN	NaN	NaN	NaN	NaN	42310000	18165000	24145000	42310000	18165000	24145000	0	0	0	0	0	0	0	0	0	0	0	0	0	0	0	0	0	0	0	0	0
RRP17	1	4	4	4	3	1	1	1	1	1	1	1	27.974	235	NaN	NaN	NaN	NaN	NaN	NaN	NaN	NaN	455290000	251730000	203560000	106230000	60731000	45502000	106710000	59975000	46732000	96787000	48386000	48401000	87150000	49331000	37819000	8446300	4105300	4341000	4907200	3149400	1757800	24808000	13735000	11072000	20248000	12311000	7936200
SYF1	1	1	1	1	1	0	0	0	0	0	0	0	100.23	859	NaN	NaN	NaN	NaN	NaN	NaN	NaN	NaN	60997000	43105000	17893000	60997000	43105000	17893000	0	0	0	0	0	0	0	0	0	0	0	0	0	0	0	0	0	0	0	0	0
RAD30	1	1	1	1	0	0	1	0	0	0	0	0	71.514	632	NaN	NaN	NaN	NaN	NaN	NaN	NaN	NaN	31567000	15225000	16342000	0	0	0	0	0	0	31567000	15225000	16342000	0	0	0	0	0	0	0	0	0	0	0	0	0	0	0
SNX41	1	4	4	4	2	1	1	0	0	0	1	2	70.74	625	0.98887	NaN	NaN	NaN	NaN	NaN	1.3388	NaN	924470000	514180000	410300000	519290000	295310000	223980000	80308000	34703000	45605000	209270000	114320000	94950000	0	0	0	0	0	0	0	0	0	65720000	30964000	34756000	49886000	38875000	11010000
BNA7	1	2	2	2	1	1	1	1	0	0	0	0	29.991	261	NaN	1.0734	1.1317	NaN	NaN	NaN	NaN	NaN	671940000	312530000	359400000	0	0	0	356540000	175140000	181400000	273620000	120540000	153080000	41773000	16852000	24921000	0	0	0	0	0	0	0	0	0	0	0	0
LRS4	1	1	1	1	0	0	0	0	0	0	0	1	39.354	347	NaN	NaN	NaN	NaN	NaN	NaN	NaN	NaN	788100	538070	250040	0	0	0	0	0	0	0	0	0	0	0	0	0	0	0	0	0	0	0	0	0	788100	538070	250040
YDR444W	1	1	1	1	0	0	1	1	0	0	0	0	78.107	687	NaN	NaN	NaN	NaN	NaN	NaN	NaN	NaN	128510000	83174000	45337000	0	0	0	0	0	0	66596000	39337000	27260000	61914000	43837000	18078000	0	0	0	0	0	0	0	0	0	0	0	0
YDR391C	1	2	2	2	1	1	2	2	0	0	0	0	26.273	232	NaN	NaN	1.2712	1.4423	NaN	NaN	NaN	NaN	615020000	312680000	302330000	95380000	38223000	57157000	89235000	46430000	42805000	257560000	154030000	103530000	172850000	74004000	98843000	0	0	0	0	0	0	0	0	0	0	0	0
SHE9	1	2	2	2	1	1	2	1	0	0	0	0	53.57	456	NaN	NaN	0.68054	NaN	NaN	NaN	NaN	NaN	233690000	171960000	61735000	0	0	0	57219000	36480000	20739000	112240000	88100000	24142000	64230000	47376000	16854000	0	0	0	0	0	0	0	0	0	0	0	0
SMP3	1	2	2	2	0	0	0	0	1	1	0	0	59.882	516	NaN	NaN	NaN	NaN	NaN	NaN	NaN	NaN	21942000	14910000	7032400	0	0	0	0	0	0	0	0	0	0	0	0	20209000	13864000	6344600	1733000	1045100	687880	0	0	0	0	0	0
SXM1	1	6	6	6	4	4	4	4	0	0	2	1	108.4	944	1.0072	1.0173	1.0249	1.0141	NaN	NaN	NaN	NaN	6947400000	3809100000	3138300000	2846300000	1591900000	1254400000	919370000	491670000	427700000	1771300000	975510000	795760000	1351600000	716680000	634940000	0	0	0	0	0	0	38233000	22890000	15343000	20629000	10481000	10148000
UTP5	1	5	5	5	4	3	1	2	0	0	1	1	72.001	643	0.97628	0.88357	NaN	0.74694	NaN	NaN	NaN	NaN	2606300000	1382900000	1223300000	1468500000	780400000	688120000	599360000	335330000	264030000	74416000	33946000	40471000	395520000	204440000	191080000	0	0	0	0	0	0	53236000	21944000	31292000	15209000	6865200	8343800
HPT1	1	3	3	3	2	2	2	2	0	0	1	0	25.19	221	0.97725	0.9181	0.94409	0.85742	NaN	NaN	0.92014	NaN	4810100000	2693900000	2116200000	1685100000	956560000	728500000	1487100000	814460000	672670000	1077700000	606190000	471470000	529930000	300830000	229100000	0	0	0	0	0	0	30313000	15873000	14440000	0	0	0
URH1	1	4	4	4	4	3	2	3	0	0	0	0	37.96	340	0.98615	1.3738	1.1971	1.4107	NaN	NaN	NaN	NaN	2919600000	1588600000	1331000000	939680000	565980000	373700000	620980000	311120000	309860000	905470000	484840000	420630000	453460000	226620000	226840000	0	0	0	0	0	0	0	0	0	0	0	0
PDR15	1	2	1	1	2	2	2	2	2	2	2	2	172.25	1529	1.0936	1.2653	1.3015	1.4803	NaN	0.9034	1.0197	0.899	3523000000	1828700000	1694300000	919720000	493360000	426360000	559470000	284370000	275100000	549100000	290170000	258930000	863280000	390390000	472890000	87582000	53745000	33837000	128940000	79608000	49336000	201500000	116420000	85084000	213410000	120610000	92798000
TRS120	1	5	5	5	2	2	2	2	0	0	1	0	147.66	1289	0.63889	0.83153	1.008	NaN	NaN	NaN	NaN	NaN	580620000	329910000	250700000	209120000	121490000	87634000	123360000	73469000	49896000	103760000	53204000	50561000	56947000	29322000	27624000	0	0	0	0	0	0	87415000	52426000	34989000	0	0	0
CAC2	1	1	1	1	0	0	0	0	0	1	1	1	51.252	468	NaN	NaN	NaN	NaN	NaN	1.0141	1.0463	1.1077	839400000	500370000	339030000	0	0	0	0	0	0	0	0	0	0	0	0	0	0	0	254620000	154440000	100180000	360490000	215300000	145200000	224290000	130630000	93652000
CUE4	1	2	2	2	0	0	0	0	2	2	2	2	12.893	117	NaN	NaN	NaN	NaN	NaN	1.2359	1.1761	1.005	2050300000	1260000000	790230000	0	0	0	0	0	0	0	0	0	0	0	0	350700000	243810000	106890000	270540000	166730000	103810000	1268900000	754410000	514530000	160100000	95099000	65005000
IOC4	1	1	1	1	1	1	0	0	0	0	0	0	55.426	475	NaN	NaN	NaN	NaN	NaN	NaN	NaN	NaN	149470000	87828000	61646000	97049000	56966000	40083000	52424000	30862000	21563000	0	0	0	0	0	0	0	0	0	0	0	0	0	0	0	0	0	0
TY1B-MR1;TY1B-BL	4	26	1	0	17	12	14	12	10	6	10	13	198.9	1755	NaN	NaN	NaN	NaN	NaN	NaN	NaN	NaN	129100000	70248000	58856000	0	0	0	0	0	0	54678000	25618000	29060000	74427000	44630000	29796000	0	0	0	0	0	0	0	0	0	0	0	0
ECM16	1	4	4	4	3	1	2	1	0	0	0	0	144.95	1267	1.1763	NaN	1.5204	NaN	NaN	NaN	NaN	NaN	1037600000	560020000	477560000	606660000	330730000	275930000	149960000	60109000	89850000	172020000	92466000	79555000	108940000	76710000	32230000	0	0	0	0	0	0	0	0	0	0	0	0
	1	4	4	4	3	2	2	2	0	1	2	2	35.278	302	NaN	0.85628	0.83584	0.9502	NaN	NaN	NaN	NaN	1520900000	874650000	646220000	120040000	66706000	53335000	430040000	234540000	195500000	496920000	287850000	209070000	376080000	220900000	155190000	0	0	0	0	0	0	51726000	33595000	18131000	46064000	31064000	14999000
TAF11	1	3	3	3	1	1	1	1	0	1	1	1	40.623	346	NaN	NaN	NaN	NaN	NaN	NaN	NaN	NaN	282270000	161360000	120920000	60720000	38576000	22145000	35265000	18241000	17025000	40333000	27301000	13032000	58889000	28887000	30002000	0	0	0	17399000	9815000	7584200	41959000	23617000	18342000	27705000	14919000	12786000
PDS5	1	2	2	2	1	1	0	1	0	0	0	0	147.04	1277	NaN	NaN	NaN	NaN	NaN	NaN	NaN	NaN	280150000	149090000	131060000	207990000	105760000	102240000	38628000	22281000	16347000	0	0	0	33526000	21049000	12477000	0	0	0	0	0	0	0	0	0	0	0	0
VPS20	1	4	4	4	0	1	1	1	1	2	3	2	25.638	221	NaN	NaN	NaN	NaN	NaN	1.0177	1.25	0.92373	511870000	295200000	216670000	0	0	0	212370000	128160000	84209000	0	0	0	142100000	79128000	62971000	8605100	5121100	3484000	11078000	6773900	4303800	100430000	53387000	47045000	37279000	22624000	14655000
	1	2	2	2	1	1	1	1	0	0	1	0	32.067	284	NaN	NaN	2.2058	NaN	NaN	NaN	NaN	NaN	76426000	30766000	45660000	11248000	4694400	6553300	11981000	4842700	7138200	37653000	15369000	22283000	15544000	5859200	9685000	0	0	0	0	0	0	0	0	0	0	0	0
RPC11	1	1	1	1	1	1	1	1	0	0	0	0	12.513	110	1.095	NaN	NaN	NaN	NaN	NaN	NaN	NaN	942790000	574220000	368570000	371610000	222630000	148980000	141990000	70809000	71176000	200470000	127490000	72980000	228720000	153290000	75432000	0	0	0	0	0	0	0	0	0	0	0	0
GYL1	1	5	5	5	3	4	2	2	0	0	0	0	82.13	720	1.13	1.0354	1.0267	0.8759	NaN	NaN	NaN	NaN	2307700000	1278900000	1028800000	497900000	277770000	220140000	641130000	322930000	318200000	1082000000	625690000	456290000	86666000	52488000	34178000	0	0	0	0	0	0	0	0	0	0	0	0
MIX14	1	2	2	2	1	1	1	1	0	0	1	1	13.866	121	NaN	NaN	NaN	NaN	NaN	NaN	NaN	NaN	461460000	252390000	209070000	99856000	60478000	39378000	93775000	48670000	45105000	122260000	67045000	55212000	131560000	67176000	64382000	0	0	0	0	0	0	2901500	2182900	718570	11110000	6838200	4271400
HNT1	1	8	8	8	5	5	4	3	1	1	1	1	17.679	158	0.99099	0.84406	0.89968	1.2063	NaN	NaN	NaN	NaN	5084100000	2600700000	2483400000	1062900000	585440000	477440000	1018200000	470270000	547900000	1460700000	770180000	690510000	1395100000	684920000	710200000	22775000	12492000	10283000	16229000	11969000	4259500	58340000	39622000	18718000	49851000	25765000	24086000
BUD22	1	4	4	4	3	3	2	2	0	0	1	0	60.053	519	0.88153	0.8357	0.88447	1.0346	NaN	NaN	NaN	NaN	1770800000	1005700000	765130000	470240000	279730000	190510000	517090000	307450000	209640000	254480000	142370000	112120000	519120000	271180000	247940000	0	0	0	0	0	0	9900300	4967700	4932600	0	0	0
PEX12	1	2	2	2	1	0	1	0	1	1	0	0	45.992	399	NaN	NaN	NaN	NaN	NaN	NaN	NaN	NaN	108980000	95319000	13662000	78653000	69428000	9224600	0	0	0	18894000	14457000	4437700	0	0	0	6105400	6105400	0	5328600	5328600	0	0	0	0	0	0	0
	1	8	8	8	6	7	7	4	0	1	0	1	54.128	470	1.0369	1.2236	1.2167	1.1449	NaN	NaN	NaN	NaN	11857000000	6105800000	5751600000	3017700000	1538000000	1479700000	3171600000	1663200000	1508500000	2853500000	1480300000	1373200000	2793300000	1411500000	1381800000	0	0	0	21356000	12861000	8494900	0	0	0	0	0	0
TAP42	1	2	2	2	1	0	0	0	0	1	1	0	42.567	366	NaN	NaN	NaN	NaN	NaN	NaN	NaN	NaN	127630000	57908000	69724000	94710000	46633000	48077000	0	0	0	0	0	0	0	0	0	0	0	0	13846000	3179000	10667000	19076000	8095900	10980000	0	0	0
SDH7	1	3	3	3	1	0	0	0	0	2	3	2	15.783	133	NaN	NaN	NaN	NaN	NaN	1.0434	1.1213	NaN	427730000	240640000	187100000	171650000	95225000	76422000	0	0	0	0	0	0	0	0	0	0	0	0	52357000	31210000	21147000	147260000	79306000	67958000	56467000	34895000	21572000
EMI1	1	1	1	1	1	1	0	1	0	0	0	1	21.071	187	NaN	NaN	NaN	NaN	NaN	NaN	NaN	NaN	509490000	315020000	194480000	171270000	107280000	63988000	186690000	117020000	69669000	0	0	0	128580000	76007000	52574000	0	0	0	0	0	0	0	0	0	22956000	14708000	8247500
YDR514C	1	6	6	6	1	2	2	1	0	0	1	0	55.489	483	NaN	1.4142	NaN	NaN	NaN	NaN	NaN	NaN	1032100000	819130000	212950000	250890000	127340000	123550000	177780000	106450000	71335000	250750000	243480000	7265600	318930000	318930000	0	0	0	0	0	0	0	33728000	22926000	10802000	0	0	0
GRH1	1	4	4	4	4	1	2	2	0	0	0	0	41.118	372	1.0102	NaN	1.01	0.81798	NaN	NaN	NaN	NaN	1782300000	951230000	831040000	1153400000	609310000	544120000	192410000	99168000	93245000	200330000	103990000	96343000	236090000	138760000	97330000	0	0	0	0	0	0	0	0	0	0	0	0
RBA50	1	7	7	7	4	6	5	6	0	0	0	0	50.192	439	0.98595	0.88951	0.84172	0.92145	NaN	NaN	NaN	NaN	1491600000	764770000	726870000	371560000	199840000	171720000	398100000	204740000	193360000	354540000	178970000	175570000	367460000	181230000	186220000	0	0	0	0	0	0	0	0	0	0	0	0
CAB1	1	1	1	1	1	1	1	1	0	0	0	0	40.903	367	NaN	NaN	0.94973	NaN	NaN	NaN	NaN	NaN	1444100000	788610000	655510000	243230000	141910000	101320000	323040000	174690000	148350000	551780000	298390000	253390000	326070000	173620000	152450000	0	0	0	0	0	0	0	0	0	0	0	0
HSP31	1	4	4	4	4	3	3	3	0	0	0	0	25.67	237	1.3201	1.3065	1.2547	1.2557	NaN	NaN	NaN	NaN	1766400000	850880000	915480000	483390000	236760000	246630000	373900000	162560000	211330000	253550000	122200000	131350000	655520000	329360000	326160000	0	0	0	0	0	0	0	0	0	0	0	0
YKU80	1	2	2	2	1	2	2	1	0	0	0	0	71.24	629	NaN	1.0898	1.0658	NaN	NaN	NaN	NaN	NaN	428790000	234710000	194090000	94134000	54079000	40055000	117150000	59292000	57854000	196210000	109740000	86469000	21302000	11593000	9709200	0	0	0	0	0	0	0	0	0	0	0	0
SPC24	1	1	1	1	1	1	1	0	0	0	0	0	24.603	213	NaN	1.1914	1.3214	NaN	NaN	NaN	NaN	NaN	350160000	191700000	158460000	176620000	98879000	77744000	26809000	12247000	14563000	146730000	80571000	66158000	0	0	0	0	0	0	0	0	0	0	0	0	0	0	0
YML096W	1	1	1	1	0	1	0	1	0	0	0	0	59.469	525	NaN	NaN	NaN	NaN	NaN	NaN	NaN	NaN	1279300000	468850000	810490000	0	0	0	675210000	281900000	393310000	0	0	0	604130000	186960000	417180000	0	0	0	0	0	0	0	0	0	0	0	0
GIM5	1	5	5	5	4	3	3	4	0	0	0	0	18.356	163	0.94165	0.96014	0.98912	0.97117	NaN	NaN	NaN	NaN	7565800000	4208800000	3356900000	2223700000	1208700000	1015100000	1776000000	998810000	777220000	1491300000	838960000	652390000	2074600000	1162400000	912260000	0	0	0	0	0	0	0	0	0	0	0	0
UTP14	1	8	8	8	7	7	5	6	0	0	0	0	103.02	899	1.0292	0.89662	0.73061	0.95265	NaN	NaN	NaN	NaN	4640300000	2684900000	1955400000	1294500000	724260000	570200000	1336300000	791960000	544320000	1095600000	644170000	451470000	913910000	524530000	389390000	0	0	0	0	0	0	0	0	0	0	0	0
	1	1	1	1	0	0	0	0	0	1	1	0	12.03	105	NaN	NaN	NaN	NaN	NaN	0.94744	NaN	NaN	24083000	14860000	9222800	0	0	0	0	0	0	0	0	0	0	0	0	0	0	0	24083000	14860000	9222800	0	0	0	0	0	0
MRPL1	1	3	3	3	0	1	1	0	0	1	2	2	30.996	285	NaN	NaN	NaN	NaN	NaN	NaN	NaN	NaN	42533000	23424000	19108000	0	0	0	0	0	0	0	0	0	0	0	0	0	0	0	0	0	0	20694000	13602000	7092800	21839000	9822900	12016000
TMA64	1	5	5	5	4	2	3	4	0	0	0	0	63.991	565	0.51512	0.99373	1.0385	0.76454	NaN	NaN	NaN	NaN	1416500000	895670000	520800000	538160000	380020000	158140000	262760000	133170000	129590000	199420000	107940000	91478000	416130000	274540000	141600000	0	0	0	0	0	0	0	0	0	0	0	0
DPB4	1	9	9	9	7	4	3	3	0	1	1	1	21.997	196	1.0438	1.1189	1.1992	1.1803	NaN	NaN	1.3192	NaN	2606500000	1350100000	1256400000	1410700000	775970000	634780000	329090000	154830000	174260000	492360000	240180000	252180000	266710000	129700000	137000000	0	0	0	25836000	5080400	20755000	58726000	31391000	27335000	23022000	12919000	10104000
SWF1	1	3	3	3	0	0	0	0	1	0	1	1	39.311	336	NaN	NaN	NaN	NaN	NaN	NaN	NaN	NaN	24554000	15606000	8948500	0	0	0	0	0	0	0	0	0	0	0	0	9404600	5259600	4145000	0	0	0	15150000	10346000	4803500	0	0	0
COG8	1	2	2	2	1	2	1	0	0	0	0	0	69.828	607	1.09	0.99794	NaN	NaN	NaN	NaN	NaN	NaN	330280000	202700000	127580000	87159000	47522000	39637000	120850000	76277000	44570000	122270000	78898000	43371000	0	0	0	0	0	0	0	0	0	0	0	0	0	0	0
POB3	1	8	8	8	6	7	5	3	0	2	2	3	62.993	552	1.0656	1.055	1.0176	1.0014	NaN	1.2526	1.049	0.90421	5669200000	3109400000	2559800000	1788000000	985760000	802250000	1474200000	833560000	640620000	1418000000	750230000	667770000	854960000	465470000	389490000	0	0	0	31857000	15919000	15938000	31906000	17799000	14107000	70263000	40623000	29640000
ERV41	1	7	7	7	2	2	0	0	1	2	2	2	40.705	352	0.93427	0.94521	NaN	NaN	NaN	0.80743	1.0043	1.0156	1223500000	719980000	503560000	230940000	118660000	112270000	143650000	85248000	58403000	0	0	0	0	0	0	11471000	8296200	3174400	30860000	20298000	10563000	354760000	221180000	133580000	451860000	266300000	185560000
CSM3	1	1	1	1	1	0	0	1	0	0	0	0	36.354	317	NaN	NaN	NaN	NaN	NaN	NaN	NaN	NaN	18741000	9772700	8968300	11270000	5710700	5559100	0	0	0	0	0	0	7471300	4062100	3409200	0	0	0	0	0	0	0	0	0	0	0	0
AIM32	1	4	4	4	0	0	0	0	1	1	2	2	35.977	311	NaN	NaN	NaN	NaN	NaN	NaN	1.0037	1.008	81630000	43096000	38534000	0	0	0	0	0	0	0	0	0	0	0	0	2219100	1820000	399080	13021000	4851800	8169300	13868000	7602000	6266400	52521000	28823000	23699000
RSE1	1	3	3	3	1	1	1	1	0	0	2	1	153.78	1361	NaN	NaN	NaN	NaN	NaN	NaN	NaN	NaN	295640000	138860000	156770000	0	0	0	89030000	38028000	51002000	69407000	30807000	38600000	114870000	56329000	58539000	0	0	0	0	0	0	11753000	7609100	4144000	10580000	6091900	4487900
GAL83	1	4	4	4	2	3	4	4	0	0	0	0	46.648	417	NaN	1.1162	1.0426	1.0071	NaN	NaN	NaN	NaN	915560000	501900000	413660000	127610000	67992000	59616000	199990000	111310000	88673000	316560000	174850000	141720000	271410000	147750000	123660000	0	0	0	0	0	0	0	0	0	0	0	0
[truncated: 1,931 more rows]
