# Supplementary material for: A systematic approach to identify recycling endocytic cargo depending on the GARP complex
Source: eLife. 2019 Jan 29;8:e42837. doi: 10.7554/eLife.42837 (PMC6374077; doi:10.7554/eLife.42837)
Supplement: Figure 4—source data 2. [file elife-42837-fig4-data2.xlsx]

## Sheet: Controls
Gene.names	Number.of.proteins	Peptides	Unique.peptides	Sequence.coverage....	Sequence.length	Sequence.lengths	Ratio.H.L.normalized.cell.ostir.k0..k8.	Ratio.H.L.normalized.cell.wt.k0..ostir.k8.	Ratio.H.L.normalized.vac.ostir.k0..k8.	Ratio.H.L.normalized.vac.wt.k0..ostir.k8.	Ratio.H.L.variability.....cell.ostir.k0..k8.	Intensity	Intensity.L	Intensity.H	Intensity.cell.ostir.k0..k8.	Intensity.L.cell.ostir.k0..k8.	Intensity.H.cell.ostir.k0..k8.	Intensity.cell.wt.k0..ostir.k8.	Intensity.L.cell.wt.k0..ostir.k8.	Intensity.H.cell.wt.k0..ostir.k8.	Intensity.vac.ostir.k0..k8.	Intensity.L.vac.ostir.k0..k8.	Intensity.H.vac.ostir.k0..k8.	Intensity.vac.wt.k0..ostir.k8.	Intensity.L.vac.wt.k0..ostir.k8.	Intensity.H.vac.wt.k0..ostir.k8.
PEP8	1	3	3	11.9	379	379	1.1346	1.0551	5.9205	NA	20.529	355530000	172160000	183370000	158350000	81141000	77205000	158540000	81872000	76666000	36052000	7695600	28357000	2589200	1449400	1139700
VPS17	1	5	5	15.4	551	551	0.91716	0.91072	4.2205	NA	26.17	635600000	349440000	286160000	176870000	93285000	83585000	432260000	250030000	182230000	22776000	4084000	18692000	3698300	2044400	1654000
LAP2	1	3	3	4.6	671	671	NA	NA	1.9281	NA	NA	293330000	151800000	141530000	136830000	70676000	66155000	152280000	79347000	72929000	4224200	1779100	2445100	0	0	0
EMC4	1	5	5	34.2	190	190	1.0074	1.0058	1.8884	1.3715	9.6861	1244000000	673430000	570530000	311210000	156540000	154660000	916170000	508860000	407310000	6383900	3207300	3176600	10203000	4820100	5382600
OSH7	1	4	4	13.3	437	437	NA	NA	1.7952	0.79904	NA	18589000	9138600	9450100	0	0	0	0	0	0	9624200	3709100	5915200	8964500	5429600	3535000
ENT4	1	2	2	10.9	247	247	NA	NA	1.6218	NA	NA	8699500	4588100	4111400	0	0	0	0	0	0	3728500	1835400	1893100	4971000	2752700	2218300
TDH1	1	17	8	56.3	332	332	2.3202	0.9066	1.5931	0.86082	28.551	2886300000	1452300000	1434000000	882010000	341280000	540730000	1893600000	1049900000	843670000	63610000	32555000	31055000	47088000	28555000	18532000
TY2B-OR1;TY2B-OR2;TY2B-C;TY2B-DR1	4	11	1	10.4	1770	1770;1770;1770;1770	1.0658	0.76581	1.5649	1.0155	12.529	2277900000	1212800000	1065100000	926260000	451360000	474900000	1334300000	752400000	581850000	5684900	2775700	2909200	11671000	6232100	5439300
ALD4	1	19	17	51.8	519	519	1.7102	1.1106	1.5588	1.1497	6.6151	4833700000	2315800000	2518000000	1556600000	633490000	923110000	2973400000	1538900000	1434500000	249480000	119550000	129930000	54309000	23841000	30468000
TRM2	1	5	5	11.6	639	639	0.99207	0.91109	1.5315	NA	15.328	290530000	163570000	126970000	177570000	95852000	81716000	110340000	66313000	44029000	2623300	1401300	1221900	0	0	0
FET3	1	4	4	9.6	636	636	NA	1.2247	1.5068	0.93436	NA	1093600000	451400000	642200000	432880000	153740000	279140000	619860000	277100000	342760000	32993000	16076000	16917000	7865400	4487300	3378100
NCR1	1	9	9	8	1170	1170	NA	NA	1.4794	1.0274	NA	127240000	68102000	59142000	0	0	0	0	0	0	13813000	7378600	6434500	113430000	60723000	52708000
VMA8	1	7	7	32	256	256	0.97733	0.95989	1.4446	0.99548	26.414	1411000000	750330000	660620000	590320000	295580000	294740000	542330000	301980000	240350000	99063000	51527000	47536000	179240000	101250000	77991000
VMA2	1	20	20	31.5	517	517	1.0033	0.97635	1.4429	0.92381	16.684	17686000000	9561300000	8124500000	5450800000	2788100000	2662700000	5465000000	3036700000	2428200000	2897300000	1502700000	1394600000	3872800000	2233800000	1639000000
ECM33	1	4	4	8.9	429	429	0.76082	0.93803	1.4341	1.0096	15.93	5461400000	3167300000	2294100000	954190000	568100000	386090000	4147900000	2401600000	1746300000	68447000	37825000	30623000	290800000	159720000	131080000
VMA10	1	6	6	31.6	114	114	1.002	0.98528	1.4294	0.86446	8.7003	11984000000	6338900000	5644800000	5848400000	3125600000	2722900000	6022000000	3147700000	2874300000	27698000	14816000	12882000	85504000	50784000	34720000
VMA1	1	36	36	35.9	1071	1071	1.0427	0.96146	1.4202	0.91961	10.645	53563000000	29076000000	24487000000	18199000000	9560200000	8638500000	20319000000	11191000000	9128200000	7790000000	4111900000	3678100000	7255100000	4212500000	3042600000
SNF1	1	9	9	18.2	633	633	0.89349	0.9563	1.4195	1.0657	12.149	1283900000	657270000	626630000	760170000	377590000	382580000	499850000	265720000	234130000	13879000	8870500	5008300	10004000	5085500	4918200
VMA13	1	12	12	24.5	478	478	1.0464	1.0576	1.4001	0.87407	4.3103	4475200000	2356900000	2118300000	1949200000	1007300000	941890000	2185800000	1159300000	1026400000	150960000	82213000	68750000	189300000	108030000	81262000
SHB17	1	3	3	8.5	271	271	0.98546	0.99255	1.3996	NA	1.9644	5839400000	3084700000	2754700000	2814100000	1446300000	1367800000	3019600000	1634700000	1384900000	5631000	3691000	1940000	0	0	0
VMA4	1	13	13	70	233	233	1.0246	0.95533	1.399	0.91978	7.9354	16465000000	8916400000	7548800000	9098200000	4824400000	4273800000	6827200000	3796300000	3030900000	272920000	138740000	134180000	267010000	157070000	109940000
VMA5	1	14	14	33.4	392	392	0.97139	0.89675	1.3905	0.91241	10.751	5518400000	3026200000	2492200000	1936300000	1024000000	912280000	2017800000	1119700000	898140000	620840000	335200000	285640000	943440000	547300000	396140000
OSH6	1	13	13	34.4	448	448	1.0473	NA	1.3886	0.91824	21.11	425550000	214670000	210880000	146650000	77577000	69071000	140870000	63203000	77671000	44638000	22666000	21972000	93394000	51223000	42171000
ARH1	1	6	6	17.2	493	493	NA	0.90601	1.3852	NA	NA	311120000	240500000	70628000	39066000	20894000	18172000	266180000	216340000	49838000	5876900	3258000	2618900	0	0	0
RSM22	1	3	3	7	628	628	NA	1.2508	1.383	NA	NA	95703000	54378000	41325000	0	0	0	91349000	52101000	39248000	3633700	1893200	1740500	720010	383640	336370
PIB2	1	8	8	18.4	635	635	NA	NA	1.3819	0.96298	NA	307260000	186290000	120960000	57975000	33616000	24358000	96760000	66310000	30450000	47412000	26483000	20929000	105110000	59885000	45225000
FUS1	1	3	3	7.8	512	512	NA	NA	1.3807	NA	NA	6353800	3751800	2602000	0	0	0	0	0	0	6353800	3751800	2602000	0	0	0
YOR389W;YPL277C	2	3	3	5.9	624	624;487	NA	NA	1.3796	0.89082	NA	22711000	12883000	9828700	0	0	0	0	0	0	9142900	5043100	4099800	13568000	7839500	5728900
FAA3	1	11	10	16.3	694	694	0.92884	0.92241	1.3751	1.1359	2.1437	1628800000	749170000	879580000	494860000	277770000	217090000	1092100000	447700000	644400000	17218000	10478000	6739100	24587000	13227000	11360000
YTA12	1	7	5	10.5	825	825	0.9697	1.6129	1.3637	NA	19.479	669490000	298320000	371170000	281500000	150070000	131440000	380000000	143910000	236090000	7981000	4338900	3642100	0	0	0
GOS1	1	3	3	19.3	223	223	0.99786	1.0014	1.3627	1.0525	11.221	613790000	330510000	283280000	300290000	161450000	138840000	303190000	163410000	139780000	3634600	1942600	1692100	6682900	3706900	2976000
RSM25	1	4	4	23.1	264	264	1.1223	1.0944	1.3609	NA	1.2453	895400000	452450000	442950000	419390000	206640000	212750000	470760000	243250000	227510000	5246200	2556400	2689700	0	0	0
UBC6	1	3	3	14.8	250	250	1.3117	NA	1.3568	0.98676	14.101	240100000	122380000	117720000	96495000	46438000	50056000	129200000	68178000	61027000	6665900	3495200	3170700	7735200	4272800	3462400
CIR1	1	8	8	33	261	261	1.1247	1.0941	1.3564	NA	11.237	2448000000	1228600000	1219400000	1164200000	562300000	601860000	1280600000	664540000	616020000	3269300	1716600	1552700	0	0	0
SMY1	1	5	5	11.3	656	656	0.31635	0.67314	1.3514	NA	94.043	476680000	364450000	112230000	330250000	265840000	64410000	142230000	96411000	45822000	4195100	2195400	1999800	0	0	0
CPS1	1	12	12	20.1	576	576	1.0155	0.97109	1.3445	0.67697	25.674	1882900000	1063400000	819570000	528520000	285210000	243310000	528840000	290700000	238130000	497260000	273000000	224260000	328330000	214470000	113860000
	1	12	12	40.7	376	376	1.5526	0.96817	1.3417	0.92531	9.4724	14794000000	7358800000	7435200000	6962800000	3034000000	3928700000	7724500000	4264400000	3460200000	91942000	50809000	41133000	14749000	9591200	5157500
VPS34	1	6	6	10.4	875	875	NA	1.2537	1.3389	1.0382	NA	162360000	79561000	82803000	54836000	27240000	27597000	40553000	16169000	24383000	31419000	17167000	14252000	35556000	18985000	16570000
MON2	1	13	13	9.5	1636	1636	NA	0.8124	1.3378	0.97071	NA	958040000	785970000	172080000	376570000	339350000	37220000	465170000	379610000	85558000	4119700	2168000	1951700	112190000	64841000	47348000
AIM36	1	3	3	16.1	255	255	1.01	NA	1.329	NA	17.286	331850000	168400000	163450000	155460000	76970000	78486000	170250000	88220000	82034000	4718200	2504300	2213900	1418800	702870	715950
KAP95	1	4	4	8.4	861	861	0.99172	1.0184	1.3276	NA	19.719	1413900000	772920000	640970000	763710000	412810000	350900000	644620000	357320000	287300000	5565300	2790400	2774900	0	0	0
MIA40	1	13	13	46.4	403	403	1.1611	1.0838	1.3202	NA	17.063	5457600000	2840900000	2616700000	2571700000	1258700000	1312900000	2876000000	1576400000	1299600000	9878800	5797300	4081500	0	0	0
CRN1	1	21	21	42.9	651	651	1.0003	1.0011	1.3184	0.95231	10.492	8950600000	4761700000	4188900000	3814600000	2031500000	1783100000	4862500000	2580700000	2281900000	195090000	105080000	90004000	78388000	44506000	33883000
DOP1	1	11	11	8.1	1698	1698	1.0602	1.032	1.3182	0.93301	3.5321	213320000	120660000	92653000	68561000	36546000	32015000	104870000	62515000	42355000	5088100	2668500	2419600	34796000	18932000	15864000
VPS33	1	10	10	16.4	691	691	NA	0.99587	1.3154	1.0496	NA	482920000	242370000	240550000	0	0	0	352650000	172370000	180280000	68668000	36000000	32668000	61599000	33999000	27600000
RTC5	1	14	14	33.5	567	567	0.91775	NA	1.3066	0.96221	30.974	606600000	304520000	302080000	103440000	55018000	48424000	167720000	69905000	97811000	106490000	55463000	51024000	228960000	124130000	104830000
APE1	1	17	17	39.9	514	514	1.1555	1.0801	1.2959	0.97343	9.8264	1526100000	827750000	698370000	86144000	41478000	44666000	190180000	89234000	100950000	675220000	376420000	298800000	574570000	320620000	253950000
MRH4	1	2	2	6.1	561	561	NA	NA	1.2959	NA	NA	110130000	50835000	59292000	19597000	8098700	11498000	86935000	40696000	46239000	3595700	2040200	1555500	0	0	0
MRPS18	1	4	4	25.3	217	217	1.0312	0.97242	1.2821	NA	8.0462	1057600000	579410000	478210000	486610000	264800000	221810000	566210000	312100000	254110000	4790500	2500100	2290400	0	0	0
MTO1	1	4	4	8.2	669	669	NA	1.1219	1.2813	NA	NA	117840000	44358000	73478000	0	0	0	113480000	42079000	71401000	4355300	2278300	2077000	0	0	0
SPS19	1	5	5	25.3	292	292	1.4562	0.9093	1.2806	1.1084	40	477480000	242270000	235210000	249420000	118580000	130840000	206430000	111860000	94568000	8806800	4544100	4262700	12815000	7276700	5537900
IRC22	1	3	3	5.8	225	225	0.98246	NA	1.2768	1.0995	0.70674	300240000	160390000	139850000	117540000	59694000	57841000	68036000	38620000	29416000	68213000	39424000	28788000	46454000	22654000	23800000
YDL180W	1	3	3	7.3	547	547	NA	NA	1.2762	0.94912	NA	6992500	3906100	3086400	0	0	0	0	0	0	3253800	1841800	1412000	3738700	2064300	1674400
ANP1	1	4	4	10.6	500	500	NA	NA	1.276	1.0672	NA	16189000	8778900	7410300	0	0	0	0	0	0	8526500	4724000	3802500	7662700	4054900	3607800
KRE5	1	11	11	9.1	1365	1365	NA	NA	1.2758	1.1376	NA	49663000	27601000	22062000	12690000	8432300	4257300	0	0	0	13821000	6943300	6877900	23152000	12226000	10926000
ERP2	1	4	3	21.4	215	215	1.0081	1.0553	1.2758	1.0281	6.4985	936990000	522620000	414360000	324090000	171940000	152150000	581180000	332710000	248470000	14957000	8644000	6313400	16762000	9329600	7432400
HMO1	1	6	6	35.4	246	246	0.98171	1.0285	1.2754	NA	3.2992	6564700000	3651400000	2913300000	2824300000	1505200000	1319100000	3731300000	2141000000	1590400000	7625500	4415700	3209800	1424000	795600	628400
YKL077W	1	4	4	8.9	392	392	NA	0.4436	1.2745	1.0035	NA	1158300000	876010000	282280000	256090000	178760000	77332000	836320000	661560000	174760000	25164000	14143000	11021000	40708000	21543000	19165000
IDH2	1	7	7	29	369	369	1.1286	1.0613	1.2742	1.1435	2.0421	9667200000	5111600000	4555600000	2429200000	1210000000	1219200000	6975500000	3759000000	3216400000	183820000	101690000	82131000	78698000	40837000	37861000
RPL23B;RPL23A	2	5	5	45.3	137	137;137	0.99695	1.0761	1.2736	1.0224	6.2064	11246000000	6061200000	5184400000	4095800000	2179300000	1916500000	7021300000	3807100000	3214300000	74130000	44198000	29932000	54221000	30577000	23644000
BIG1	1	3	3	11.9	335	335	NA	NA	1.2717	1.2189	NA	15858000	8337000	7520800	0	0	0	0	0	0	12564000	6817500	5746100	3294200	1519500	1774700
TCO89	1	14	14	25.8	799	799	1.1937	1.0511	1.2717	0.99021	31.018	855960000	446330000	409630000	370450000	181220000	189220000	392700000	213260000	179440000	13459000	8254400	5204500	79353000	43592000	35761000
INO1	1	10	10	19.1	533	533	1.5367	0.8435	1.2712	1.1593	7.7604	14082000000	7374500000	6707900000	4876300000	2055300000	2821000000	9128200000	5273800000	3854400000	61908000	36485000	25423000	15978000	8932000	7046500
OST1	1	6	6	17.6	476	476	NA	1.1053	1.2692	1.0353	NA	476510000	253520000	222990000	84739000	43877000	40862000	246320000	129740000	116580000	61370000	33621000	27749000	84085000	46282000	37804000
MRPL24	1	5	5	22.1	258	258	1.0552	0.95144	1.2675	NA	3.9958	453760000	254050000	199710000	183350000	95117000	88231000	267200000	157120000	110080000	3210100	1808500	1401600	0	0	0
SPC3	1	4	4	21.2	184	184	NA	NA	1.2659	1.0745	NA	190370000	105110000	85263000	0	0	0	69992000	38614000	31379000	71250000	39447000	31803000	49132000	27051000	22081000
TIM44	1	10	10	29.5	431	431	1.0539	0.98391	1.2637	1.3289	7.2605	4897600000	2325800000	2571800000	2320100000	1125600000	1194600000	2507000000	1161500000	1345500000	51497000	29435000	22062000	18931000	9259100	9672300
JEM1	1	8	8	13.6	645	645	NA	NA	1.2632	0.9704	NA	70379000	47846000	22533000	0	0	0	0	0	0	38451000	26026000	12425000	31928000	21821000	10107000
MAM3	1	7	7	18.8	706	706	1.4219	0.96446	1.263	0.98212	33.899	672290000	363750000	308540000	225990000	109740000	116240000	248590000	142300000	106300000	109130000	61475000	47655000	88579000	50231000	38348000
FCY2	1	4	4	8.4	533	533	NA	NA	1.261	0.91683	NA	149960000	89566000	60389000	36253000	21161000	15092000	61809000	38923000	22886000	6024700	3192900	2831800	45868000	26289000	19579000
ERO1	1	12	12	23.1	563	563	NA	NA	1.2597	1.1203	NA	373640000	186080000	187560000	0	0	0	161890000	75844000	86047000	143180000	75866000	67310000	68578000	34373000	34205000
ALD5	1	16	14	35.8	520	520	1.0401	0.54145	1.2567	0.59945	20.345	2402300000	1476800000	925580000	918640000	457890000	460740000	1409700000	973960000	435750000	41532000	23380000	18152000	32461000	21531000	10929000
CHS3	1	10	10	10.7	1165	1165	1.0134	0.92461	1.2564	1.0182	25.007	378910000	209720000	169190000	119690000	63898000	55795000	231070000	130180000	100880000	6516200	3471100	3045100	21636000	12168000	9468800
TMA7	1	7	7	54.7	64	64	0.97582	1.0668	1.256	1.2288	4.5266	12948000000	7057300000	5890200000	6217300000	3358000000	2859300000	6701600000	3684000000	3017600000	13693000	7387000	6306400	14966000	7976200	6989300
POR1	1	10	10	51.9	283	283	1.125	0.93378	1.2542	0.99398	5.4323	6981000000	3954500000	3026600000	2548600000	1310800000	1237800000	4108100000	2462900000	1645100000	162560000	90541000	72020000	161860000	90224000	71632000
FET5	1	6	6	14.6	622	622	1.0346	NA	1.2542	1.0022	3.6503	1224700000	679400000	545340000	110090000	54542000	55547000	24685000	14787000	9898100	485210000	277390000	207820000	604770000	332690000	272080000
YHR202W	1	4	4	8.6	602	602	NA	NA	1.2537	1.1558	NA	26422000	13161000	13261000	0	0	0	0	0	0	10891000	5659200	5231300	15532000	7501600	8030000
EAR1	1	2	2	5.3	550	550	0.80986	NA	1.2517	NA	12.505	130430000	71997000	58432000	68730000	39930000	28801000	55072000	28544000	26529000	4524600	2363400	2161200	2101400	1160200	941110
NOP12	1	13	13	36.2	459	459	0.98248	0.9885	1.2513	1.058	9.6408	8556600000	4588800000	3967800000	4264900000	2236100000	2028800000	4273500000	2344600000	1928900000	12670000	5400900	7269300	5504900	2736300	2768600
HSP78	1	8	8	14.3	811	811	1.2911	1.0009	1.2503	1.2872	15.391	1339300000	614320000	724940000	463950000	207180000	256770000	843540000	389500000	454040000	27412000	15414000	11998000	4363300	2228400	2134900
SEC66	1	5	5	31.6	206	206	0.87039	0.95301	1.2495	0.97723	14.872	915240000	520010000	395230000	339370000	194560000	144810000	442910000	249310000	193600000	78838000	46077000	32761000	54126000	30063000	24063000
KAR2	1	36	35	54.7	682	682	1.0249	1.0369	1.2482	1.075	19.608	39981000000	21194000000	18787000000	18861000000	9786300000	9074900000	13931000000	7408500000	6522700000	4319100000	2466200000	1852900000	2869200000	1532500000	1336600000
VPS30	1	5	5	11	557	557	1.0799	NA	1.2465	1.0982	52.915	97805000	45472000	52333000	54358000	23323000	31034000	28168000	13592000	14576000	3819300	1953900	1865400	11461000	6602900	4857700
NNF2	1	8	8	9.9	936	936	0.96049	0.98847	1.2451	1.1065	171.09	198240000	110870000	87375000	89920000	48954000	40966000	89996000	52450000	37546000	4450000	2641200	1808800	13877000	6822100	7054700
PCS60	1	13	13	35.2	543	543	1.1084	1.1425	1.2448	1.0268	12.782	785910000	409130000	376780000	426600000	209260000	217340000	105890000	61962000	43923000	101220000	55886000	45333000	152210000	82027000	70184000
KOG1	1	21	21	17.8	1557	1557	NA	NA	1.2441	0.9524	NA	261180000	145330000	115850000	0	0	0	0	0	0	97494000	54603000	42890000	163690000	90731000	72959000
FPR2	1	2	2	17.8	135	135	0.99296	1.0055	1.2421	NA	0.42162	946480000	524870000	421610000	216730000	115290000	101440000	715500000	401330000	314170000	9131100	5331900	3799100	5119700	2916600	2203000
PSD1	1	6	6	17	500	500	1.0329	1.0142	1.2418	0.93231	10.886	950450000	542080000	408370000	171330000	93542000	77785000	766740000	441580000	325160000	6350600	3405100	2945500	6026300	3551700	2474500
AIM45	1	3	3	13.4	344	344	NA	NA	1.2412	NA	NA	603210000	308660000	294550000	316420000	155080000	161340000	274310000	146290000	128010000	12485000	7289100	5196300	0	0	0
DAP2	1	18	18	24.9	818	818	NA	NA	1.2402	0.97151	NA	2041800000	1142900000	898930000	40288000	15129000	25159000	156210000	94580000	61632000	521210000	288640000	232570000	1324100000	744520000	579570000
TCD2	1	4	4	12.3	447	447	NA	NA	1.2397	NA	NA	147080000	83540000	63539000	141600000	80515000	61088000	0	0	0	5475800	3024300	2451500	0	0	0
SHE10	1	14	14	27.9	577	577	1.0346	1.0313	1.2395	1.0641	17.324	6059700000	3178000000	2881700000	1866500000	983290000	883260000	3833800000	1992300000	1841500000	205370000	116150000	89216000	153980000	86268000	67714000
GLO2	1	6	6	28.5	274	274	0.91881	0.96911	1.2389	NA	10.492	2369800000	1329200000	1040600000	1125800000	646590000	479240000	1235900000	678050000	557820000	8118000	4561500	3556600	0	0	0
OSM1	1	4	4	10.2	501	501	1.1661	1.0671	1.2373	NA	0.94606	549320000	288960000	260360000	231940000	113320000	118620000	294270000	162470000	131810000	19114000	10934000	8180100	3985400	2231300	1754100
GPI17	1	5	5	12.2	534	534	NA	NA	1.2371	NA	NA	19950000	9462400	10487000	0	0	0	0	0	0	16113000	7815900	8296600	3837200	1646500	2190700
HSP60	1	27	27	58.7	572	572	1.0948	1.0807	1.2367	1.1829	9.4403	47511000000	24659000000	22852000000	23013000000	11588000000	11425000000	22433000000	11897000000	10536000000	1581000000	910180000	670870000	483670000	263690000	219970000
DPL1	1	10	10	28.4	589	589	NA	0.90302	1.2349	0.96449	NA	586270000	338100000	248170000	234380000	136960000	97427000	243800000	141970000	101820000	63525000	35177000	28348000	44566000	23995000	20571000
GPI16	1	2	2	3	610	610	NA	NA	1.2332	0.95951	NA	27604000	15301000	12303000	0	0	0	0	0	0	18379000	10520000	7859500	9224800	4781500	4443200
LSC2	1	11	11	33	427	427	1.0985	1.0269	1.2327	1.1483	10.32	4237900000	2111900000	2126000000	1651500000	768740000	882710000	2517100000	1305000000	1212100000	52354000	29140000	23214000	16981000	8992900	7988400
LST8	1	3	3	15.2	303	303	NA	NA	1.2316	1.0418	NA	30605000	17429000	13176000	0	0	0	0	0	0	16246000	9079000	7167300	14359000	8350400	6008400
SWP1	1	5	5	19.9	286	286	NA	NA	1.2306	1.0789	NA	167280000	86396000	80888000	6411500	2048900	4362500	0	0	0	71727000	38479000	33248000	89145000	45868000	43277000
SEC11	1	3	3	13.2	167	167	1.0008	1.0542	1.2297	NA	92.752	624600000	291520000	333090000	389450000	159140000	230310000	228670000	128730000	99944000	5426300	3082600	2343700	1059600	566860	492710
IMD2	2	11	4	32.1	523	523;403	1.1314	1.3219	1.2289	1.1785	8.951	1964500000	982250000	982280000	785040000	401170000	383870000	1162100000	571570000	590540000	10152000	5811400	4340700	7227400	3701200	3526200
SNL1	1	2	2	24.5	159	159	NA	NA	1.2272	1.0265	NA	37128000	20834000	16294000	0	0	0	0	0	0	20958000	11652000	9305900	16170000	9182300	6987800
AVT7	1	2	2	5.5	490	490	NA	NA	1.225	0.99096	NA	37026000	20704000	16322000	0	0	0	0	0	0	11447000	6452700	4994100	25579000	14251000	11328000
RHO1	1	5	5	34	209	209	NA	NA	1.2248	0.98599	NA	1264700000	712860000	551850000	0	0	0	0	0	0	336140000	192680000	143460000	928580000	520190000	408390000
SEC61	1	4	4	9.6	480	480	NA	NA	1.2248	1.0872	NA	99397000	53981000	45415000	0	0	0	58521000	34292000	24229000	20990000	10679000	10312000	19885000	9011100	10874000
ADP1	1	10	10	10.7	1049	1049	1.0524	0.90888	1.2236	0.99048	0.97757	1322500000	779620000	542850000	149810000	71248000	78561000	444080000	299820000	144250000	286670000	161010000	125660000	441900000	247530000	194370000
SEH1	1	5	5	25.2	349	349	NA	0.8506	1.223	NA	NA	230310000	81232000	149080000	27451000	16635000	10817000	187910000	56351000	131560000	10173000	5769600	4403300	4775600	2477300	2298300
MDH3	1	9	9	40.8	343	343	1.0809	0.94704	1.2226	1.1309	8.4591	2380500000	1260000000	1120500000	953310000	488030000	465290000	1193300000	645170000	548160000	106010000	59626000	46380000	127850000	67141000	60711000
SEC63	1	19	19	36	663	663	1.0225	0.98378	1.221	1.0369	8.3559	3574200000	1941900000	1632300000	1463000000	744730000	718290000	1049400000	604100000	445260000	513810000	290840000	222960000	548000000	302200000	245800000
GTB1	1	11	11	20.5	702	702	NA	NA	1.2204	1.0222	NA	406820000	311520000	95307000	272770000	247710000	25056000	58582000	21170000	37412000	59889000	34156000	25733000	15587000	8481500	7105800
LEU4	1	10	8	18.6	619	619	1.1538	0.65838	1.2202	0.7163	43.96	848610000	489180000	359430000	185680000	92854000	92825000	575190000	344970000	230220000	71146000	41010000	30135000	16591000	10338000	6253000
HTB2;HTB1	2	3	3	24.4	131	131;131	0.94581	1.0009	1.2192	0.96348	9.5466	29717000000	16024000000	13693000000	16063000000	8597600000	7465000000	13592000000	7389900000	6202000000	25895000	14402000	11493000	36383000	21944000	14438000
AAT2	1	13	13	48.3	418	418	1.0595	0.93209	1.2185	0.99799	47.524	4334900000	2195300000	2139600000	1727100000	848530000	878550000	2072400000	1050400000	1022000000	268120000	149690000	118420000	267280000	146660000	120620000
SCW10	1	5	5	13.9	389	389	1.3267	0.99304	1.2184	0.90228	9.5126	2591400000	1280800000	1310600000	1173100000	553210000	619850000	1380700000	705400000	675270000	22443000	13101000	9342200	15196000	9092500	6103600
CBR1	1	14	14	58.1	284	284	1.0585	1.039	1.2182	1.0066	5.9962	6642400000	3438200000	3204300000	2731400000	1390400000	1341000000	2814900000	1441900000	1373100000	524340000	293710000	230630000	571730000	312170000	259560000
SRP40	1	6	6	20.2	406	406	1.0028	1.0121	1.2177	0.96287	3.6411	6944000000	3743600000	3200400000	3631500000	1929100000	1702400000	3286100000	1799500000	1486600000	6406900	3962700	2444100	19955000	10976000	8978800
GIS4	1	4	4	7	774	774	NA	NA	1.2162	NA	NA	75737000	40095000	35641000	0	0	0	65068000	34025000	31043000	5259500	2999000	2260500	5409500	3071700	2337800
CPR5	1	6	6	34.2	225	225	NA	0.47078	1.2159	0.97964	NA	429290000	289460000	139840000	101920000	78913000	23003000	218690000	148890000	69804000	52397000	29929000	22468000	56287000	31728000	24560000
	1	9	9	23.8	404	404	NA	NA	1.2148	1.035	NA	1269400000	698270000	571080000	260550000	139090000	121460000	368090000	204270000	163820000	289460000	162790000	126670000	351250000	192120000	159140000
MYO2	1	23	21	19.5	1574	1574	0.97752	1.0249	1.2142	0.97621	10.13	3385200000	1708200000	1677000000	1004600000	545520000	459090000	2356400000	1149900000	1206600000	8519500	4548900	3970600	15620000	8274500	7345500
PDI1	1	24	24	52.7	522	522	1.0657	1.0452	1.2135	1.0288	16.812	56010000000	28943000000	27067000000	23318000000	11481000000	11838000000	30352000000	16146000000	14206000000	1831200000	1041300000	789920000	508640000	275310000	233330000
TOR1	1	26	24	13	2470	2470	NA	NA	1.2131	0.97845	NA	278770000	156630000	122140000	0	0	0	28566000	14598000	13969000	27556000	15483000	12073000	222650000	126550000	96099000
ARP3	1	9	9	30.1	449	449	0.84128	0.8522	1.2131	NA	23.699	1761200000	964420000	796780000	458260000	243530000	214730000	1276300000	706300000	569980000	20041000	10294000	9747400	6609400	4285100	2324200
ZRT3	1	5	5	13.3	503	503	NA	0.96451	1.2119	0.93444	NA	635850000	369550000	266300000	120010000	66237000	53771000	378150000	224240000	153910000	60892000	35044000	25848000	76800000	44026000	32774000
THI7	3	3	3	6	598	598;598;599	NA	NA	1.2119	0.92082	NA	22883000	13183000	9699500	0	0	0	0	0	0	7058400	4045800	3012600	15825000	9137600	6686900
DLD2	1	9	8	19.4	530	530	NA	1.0554	1.2115	1.1382	NA	282040000	143440000	138600000	0	0	0	236100000	115800000	120300000	34266000	21143000	13123000	11681000	6501200	5179300
ATP11	1	5	5	18.6	318	318	0.97826	1.0332	1.211	NA	26.043	476120000	254250000	221870000	54317000	29050000	25268000	419630000	223940000	195680000	2176400	1258400	918050	0	0	0
MRPS35	1	5	5	20.3	345	345	NA	NA	1.2084	1.3372	NA	199380000	54050000	145330000	0	0	0	180360000	44209000	136150000	10723000	5611200	5111800	8294200	4229800	4064400
CPR3	1	7	6	44.5	182	182	1.0545	1.0185	1.2065	NA	2.7009	5853000000	3141000000	2712000000	2630800000	1339600000	1291200000	3213300000	1796600000	1416700000	9000600	4830100	4170600	0	0	0
ATG15	1	5	5	13.7	520	520	NA	NA	1.2063	0.96302	NA	40841000	21817000	19024000	0	0	0	0	0	0	28526000	14878000	13649000	12315000	6939200	5375700
ERG26	1	10	10	34.7	349	349	0.96483	1.0533	1.2062	1.1187	16.111	2614000000	1405400000	1208600000	1111600000	588070000	523540000	1217000000	658080000	558930000	161010000	92439000	68569000	124350000	66809000	57539000
SSC1	1	26	24	53.1	654	654	1.0349	1.0318	1.2054	1.1321	9.9201	80730000000	42706000000	38024000000	35673000000	18401000000	17271000000	42033000000	22618000000	19414000000	1970000000	1135200000	834800000	1055000000	551210000	503840000
QRI1	1	7	7	20.3	477	477	1.0621	1.0815	1.2039	NA	45.183	1425000000	636740000	788220000	786390000	361960000	424440000	631980000	271260000	360720000	6585300	3519200	3066000	0	0	0
YME1	1	8	8	15.9	747	747	0.94883	0.88825	1.2037	NA	4.6986	1647700000	912490000	735190000	824980000	445390000	379590000	810180000	459810000	350370000	8462000	5031000	3431000	4052700	2260200	1792500
KGD1	1	9	9	13.3	1014	1014	1.0148	1.0876	1.2029	1.1383	9.1687	2429300000	1292600000	1136800000	1352100000	731510000	620570000	1024600000	533490000	491100000	35946000	19748000	16198000	16724000	7822900	8901300
CNE1	1	3	3	10.6	502	502	NA	NA	1.2026	1.1784	NA	10211000	5260000	4950900	0	0	0	0	0	0	6060700	3097500	2963200	4150300	2162500	1987700
OSW7	1	3	3	9	510	510	NA	NA	1.2013	0.97933	NA	16271000	8503500	7767100	0	0	0	0	0	0	10388000	5511300	4876800	5882500	2992200	2890300
ECM14	1	5	5	15.3	430	430	1.1123	0.95155	1.2011	1.004	1.9571	1206800000	658030000	548790000	432440000	217780000	214660000	335950000	193860000	142090000	155650000	88449000	67197000	282780000	157940000	124840000
IFM1	1	4	4	8.6	676	676	NA	1.2374	1.1999	1.1424	NA	245110000	131290000	113820000	108180000	64751000	43427000	130170000	62969000	67199000	4774400	2482300	2292100	1988600	1090400	898180
ERP4	1	4	3	21.3	207	207	NA	NA	1.1999	NA	NA	148270000	83213000	65055000	0	0	0	140730000	79392000	61333000	6491500	3204900	3286600	1051300	615670	435680
STE4	1	6	6	21.5	423	423	NA	NA	1.1978	0.95328	NA	343400000	201000000	142390000	145580000	87636000	57946000	64997000	40165000	24833000	33898000	17452000	16446000	98920000	55751000	43169000
	1	22	22	27.8	869	869	0.9872	NA	1.1966	0.9459	21.53	604310000	336950000	267360000	120870000	63831000	57044000	0	0	0	125300000	71005000	54293000	358130000	202110000	156020000
ROT2	1	4	4	6.5	954	954	NA	0.91731	1.1962	1.1219	NA	199080000	111080000	88002000	22260000	11117000	11143000	143170000	81256000	61918000	16751000	9430100	7320400	16897000	9276300	7620900
TCB1	1	23	23	24.7	1186	1186	0.98342	1.0258	1.1959	1.0461	67.199	2827300000	1450300000	1377000000	1009600000	463560000	546010000	1502000000	826710000	675310000	36535000	11560000	24974000	279200000	148520000	130680000
SCP160	1	45	45	49.2	1222	1222	0.96382	0.99894	1.1956	1.008	24.457	32757000000	17674000000	15083000000	15407000000	8298800000	7108100000	16960000000	9162300000	7797500000	156490000	84641000	71852000	233370000	127870000	105490000
MSW1	1	4	4	14	379	379	2.0293	NA	1.1955	NA	55.741	104090000	44194000	59894000	80755000	29192000	51563000	20381000	13470000	6911000	2064400	1085900	978470	887520	445850	441680
TIM54	1	6	6	16.3	478	478	0.90323	0.85254	1.1949	NA	16.969	760250000	424420000	335840000	252530000	139540000	112990000	504230000	282820000	221410000	3493600	2060200	1433400	0	0	0
SDH1	2	5	5	9.4	640	640;634	0.95026	0.99657	1.1948	NA	3.3289	389810000	209180000	180630000	108660000	57835000	50824000	275230000	147750000	127480000	5926400	3600100	2326200	0	0	0
	1	3	3	17.1	205	205	NA	NA	1.1943	0.9766	NA	146410000	76738000	69674000	51787000	27567000	24220000	70685000	35001000	35684000	17239000	10439000	6800500	6700300	3731100	2969200
RME1	1	2	2	8	300	300	NA	NA	1.1931	NA	NA	62732000	39484000	23247000	57556000	36458000	21098000	0	0	0	4269500	2518400	1751100	906450	508030	398430
MEF1	1	11	11	17.5	761	761	1.1326	1.0292	1.1917	1.0602	10.249	1988100000	1066800000	921290000	971070000	505840000	465220000	964590000	532390000	432200000	32784000	18337000	14447000	19646000	10227000	9419000
FMP52	1	9	9	47.2	231	231	1.0943	1.0758	1.1895	1.02	6.5148	1459800000	561040000	898780000	210960000	96216000	114750000	863910000	290500000	573410000	144910000	66994000	77915000	240050000	107340000	132710000
NOG2	1	6	6	15.4	486	486	0.93392	0.88907	1.1892	1.0628	110.12	3010600000	1467700000	1542900000	1272200000	416460000	855770000	1731000000	1047400000	683680000	3506300	1770500	1735800	3784400	2062500	1721900
	1	10	10	11.5	862	862	NA	NA	1.1876	0.96678	NA	287450000	148080000	139370000	0	0	0	0	0	0	84164000	45141000	39023000	203290000	102940000	100350000
APE3	1	24	24	41.9	537	537	0.98	1.0258	1.1874	0.97993	6.8631	39973000000	21865000000	18107000000	9008600000	4765000000	4243600000	17001000000	9209700000	7791000000	5904000000	3441400000	2462600000	8059400000	4449100000	3610300000
SCJ1	1	7	7	19.9	377	377	1.1657	NA	1.1872	1.0689	10.1	675300000	309910000	365390000	267870000	124730000	143140000	237750000	89716000	148030000	116490000	66118000	50372000	53192000	29347000	23845000
GTT1	1	5	5	24.4	234	234	1.1466	1.0692	1.1871	1.084	12.005	713020000	394310000	318710000	305540000	159450000	146090000	352320000	204490000	147840000	17914000	10043000	7870900	37246000	20334000	16912000
PMT1	1	6	6	8.3	817	817	0.95723	0.97542	1.1864	1.0443	11.157	4877600000	2698800000	2178700000	1922800000	1069800000	852990000	2660700000	1468500000	1192200000	18158000	9873200	8284700	275920000	150690000	125230000
FRA1	1	11	11	13.4	749	749	NA	NA	1.1858	0.95582	NA	1012100000	578890000	433180000	0	0	0	0	0	0	450580000	261280000	189300000	561490000	317620000	243880000
ACO1	1	21	19	32.3	778	778	1.0173	0.9639	1.185	1.0837	10.027	8239500000	4450500000	3789000000	3834300000	2007300000	1827100000	3376700000	1867700000	1509000000	596600000	344090000	252510000	431880000	231440000	200440000
LHS1	1	21	21	28.9	881	881	NA	0.99437	1.1845	0.98892	NA	999270000	554460000	444810000	171760000	89446000	82316000	474800000	263800000	211000000	176090000	101760000	74327000	176620000	99454000	77168000
NIC96	1	6	6	7.7	839	839	0.96808	1.0754	1.1841	1.0447	13.084	1270100000	677740000	592320000	635490000	341760000	293730000	615290000	325290000	290000000	8459500	4734100	3725400	10818000	5962200	4855900
	1	3	3	13.6	396	396	NA	NA	1.1835	0.98742	NA	76339000	41383000	34956000	0	0	0	0	0	0	47945000	26255000	21690000	28394000	15128000	13266000
TCB3	1	33	33	26.8	1545	1545	0.95536	0.93846	1.1833	1.0553	8.1517	5737400000	3176700000	2560800000	1907500000	1055800000	851740000	3360600000	1862400000	1498300000	105490000	62567000	42921000	363770000	195970000	167800000
CAP1	1	4	4	14.2	268	268	1.0227	0.92932	1.1823	NA	6.8038	1096900000	608980000	487940000	443040000	239750000	203290000	646550000	365160000	281380000	7337400	4067100	3270200	0	0	0
LAT1	1	14	14	29.5	482	482	1.0522	0.91997	1.1809	0.99728	10.044	7047600000	3536200000	3511500000	2607500000	1234900000	1372700000	4055100000	2085600000	1969500000	259920000	145730000	114200000	125120000	69967000	55148000
MSS116	1	12	12	22.4	664	664	1.0324	1.085	1.1807	1.2699	7.1092	2437800000	1273600000	1164200000	993280000	503160000	490120000	1354700000	723940000	630750000	71531000	37289000	34242000	18270000	9182900	9087500
LIP1	1	3	3	20	150	150	0.95757	0.89556	1.1798	0.97699	7.1216	845570000	476680000	368900000	416870000	231090000	185780000	365180000	209230000	155950000	29999000	17553000	12445000	33520000	18803000	14717000
UTH1	1	4	4	24.1	365	365	1.1409	0.88097	1.1772	NA	5.5063	1540500000	849390000	691150000	656030000	327890000	328140000	876930000	517150000	359780000	7582800	4352800	3230100	0	0	0
CWH41	1	14	14	19	833	833	0.9118	1.0523	1.1772	1.0854	0.40284	700060000	392330000	307720000	160210000	82029000	78182000	386070000	228730000	157340000	75047000	40655000	34392000	78725000	40915000	37810000
INP54	1	4	4	11.2	384	384	NA	NA	1.1766	1.0751	NA	26077000	15226000	10852000	0	0	0	0	0	0	17976000	10496000	7479700	8101300	4729400	3371900
QCR2	1	9	9	37	368	368	1.0378	1.0112	1.1763	1.1162	10.533	3725600000	1632100000	2093400000	1571500000	654320000	917220000	1951900000	873620000	1078300000	155860000	83419000	72442000	46237000	20783000	25454000
SYG1	1	8	8	9	902	902	NA	NA	1.1763	0.94285	NA	164340000	93745000	70599000	0	0	0	0	0	0	18558000	11250000	7308600	145790000	82496000	63290000
SEA4	1	7	7	11.9	1038	1038	1.0148	NA	1.1762	1.0718	2.1179	90401000	51687000	38714000	60107000	34070000	26037000	0	0	0	14925000	8818300	6106800	15369000	8798700	6570000
YML020W	1	10	10	20.6	664	664	NA	NA	1.1759	0.93031	NA	198890000	117470000	81428000	0	0	0	42908000	27661000	15246000	43080000	24515000	18564000	112910000	65290000	47617000
ATP1	1	11	11	28.8	545	545	1.0013	1.0475	1.1755	1.1149	15.513	7311300000	3878800000	3432500000	2499000000	1272900000	1226100000	4225800000	2279500000	1946300000	366470000	209190000	157280000	220010000	117240000	102770000
PHO90	1	3	3	4.9	881	881	NA	NA	1.1744	1.1786	NA	5120100	2733200	2386900	0	0	0	0	0	0	1298500	752110	546380	3821600	1981100	1840500
HEM1	1	8	8	18.8	548	548	0.97795	0.94748	1.1738	NA	2.9583	500800000	261610000	239190000	360470000	186550000	173920000	119870000	64466000	55401000	20463000	10598000	9864900	0	0	0
MEX67	1	5	5	12.4	599	599	NA	NA	1.1734	1.0373	NA	44951000	22537000	22414000	23315000	10662000	12654000	0	0	0	13126000	7706100	5419600	8510200	4169300	4340900
PFF1	1	14	14	16.8	976	976	NA	NA	1.1731	0.9689	NA	1545400000	867120000	678270000	0	0	0	0	0	0	435360000	241540000	193810000	1110000000	625580000	484460000
VTC4	1	26	26	39.9	721	721	0.96319	0.98094	1.1728	0.96268	5.6207	7018400000	3922800000	3095600000	286860000	142210000	144660000	447810000	237140000	210670000	2467500000	1424600000	1042800000	3816300000	2118900000	1697400000
VNX1	1	8	8	12.3	908	908	NA	NA	1.1707	0.97907	NA	341640000	195580000	146060000	44606000	26481000	18125000	0	0	0	77205000	43714000	33491000	219830000	125380000	94449000
MAS1	1	4	4	8.7	462	462	1.1212	1.1016	1.1698	NA	6.3067	647730000	341890000	305830000	280580000	142960000	137620000	350230000	189400000	160830000	15050000	8515100	6535200	1871600	1015000	856570
MSC6	1	6	6	12.7	692	692	1.0786	NA	1.1687	NA	5.7329	359470000	184620000	174850000	216650000	111460000	105190000	137000000	69754000	67243000	5822200	3408000	2414200	0	0	0
OLE1	1	10	10	19	510	510	0.97991	0.92007	1.1679	0.92488	2.7061	5241200000	2852600000	2388600000	1764200000	928140000	836090000	3353300000	1851500000	1501800000	9402200	5038700	4363500	114320000	67924000	46398000
PMT2	1	5	5	12.5	759	759	0.9759	1.2053	1.1677	0.99007	2.4674	2701900000	1426800000	1275200000	1433600000	772850000	660790000	979950000	492900000	487040000	58557000	33403000	25155000	229800000	127630000	102180000
HLJ1	1	3	3	14.3	224	224	NA	NA	1.1677	0.95368	NA	55722000	30521000	25201000	0	0	0	0	0	0	21801000	12633000	9167500	33921000	17888000	16033000
SIL1	1	4	4	14.3	421	421	1.1604	0.9631	1.1674	0.97505	10.442	794110000	401080000	393040000	379310000	184260000	195050000	394460000	205140000	189320000	13613000	7790200	5822700	6727300	3884800	2842500
ILV6	1	2	2	9.4	309	309	NA	NA	1.1669	NA	NA	34791000	20236000	14555000	0	0	0	0	0	0	34791000	20236000	14555000	0	0	0
PEP4	1	13	13	37.8	405	405	1.1097	0.87699	1.1668	0.96653	5.2742	6660900000	3632900000	3028000000	1610200000	769250000	840960000	2234100000	1234000000	1000100000	2095400000	1226900000	868530000	721170000	402720000	318450000
VTC2	1	37	36	44.7	828	828	0.90201	1.0519	1.1668	1.0051	17.144	5313600000	3038000000	2275500000	338370000	187930000	150450000	391580000	211810000	179770000	1805000000	1070200000	734770000	2778600000	1568100000	1210500000
PHO88	1	9	9	52.7	188	188	0.99423	0.99603	1.1658	1.0139	12.269	34919000000	18780000000	16139000000	17607000000	9244200000	8362900000	16723000000	9203200000	7519800000	310140000	179410000	130730000	278650000	153090000	125560000
MNN9	1	4	4	12.7	395	395	0.97469	1.1192	1.1658	1.0554	30.311	714470000	383440000	331020000	466140000	247610000	218530000	231150000	126480000	104670000	7933900	4625700	3308200	9245300	4734000	4511300
YPT32	1	6	5	38.3	222	222	NA	0.99326	1.1653	0.99608	NA	417980000	223280000	194700000	128480000	65468000	63010000	195810000	104760000	91058000	28523000	16336000	12187000	65169000	36723000	28446000
SUP35	1	19	19	37.1	685	685	0.99295	1.0063	1.1652	0.97405	19.468	21762000000	11751000000	10010000000	7366700000	3926600000	3440200000	14273000000	7756800000	6516500000	63509000	35273000	28236000	58027000	32463000	25564000
SPC2	1	2	2	15.2	178	178	NA	NA	1.1651	0.90998	NA	6917700	4030800	2886900	0	0	0	0	0	0	4344700	2503500	1841200	2573100	1527300	1045700
TYW1	1	15	15	20.1	810	810	0.98391	0.93437	1.1648	0.98463	24.689	1010700000	545090000	465640000	338350000	180720000	157630000	596200000	322180000	274020000	32340000	18037000	14304000	43836000	24146000	19690000
DLD1	1	9	9	21	587	587	1.0837	1.0042	1.1647	0.56325	17.929	1509200000	824560000	684650000	534150000	296620000	237530000	908660000	490930000	417730000	63127000	35070000	28058000	3269900	1932900	1337000
VPS62	1	10	10	25.1	467	467	NA	NA	1.1643	0.92999	NA	538190000	296120000	242070000	37444000	18875000	18568000	98804000	61017000	37787000	216450000	112160000	104290000	185500000	104070000	81424000
SLM1	1	7	7	12.1	686	686	NA	1.1285	1.1633	0.94512	NA	180420000	98870000	81553000	25027000	13564000	11463000	73530000	40721000	32809000	19455000	11193000	8261300	62410000	33390000	29020000
NYV1	1	5	5	28.5	253	253	NA	NA	1.1625	0.97104	NA	813030000	448550000	364480000	143520000	79834000	63681000	228390000	129410000	98976000	124690000	73243000	51443000	316440000	166060000	150380000
MSC7	1	14	14	27.8	644	644	1.0218	1.0231	1.1613	1.0934	18.098	1159500000	602680000	556830000	235570000	119100000	116470000	630740000	318130000	312610000	177280000	102440000	74841000	115920000	63002000	52923000
ERG9	1	7	7	15.8	444	444	1.0248	1.0587	1.1598	1.0114	3.5579	685940000	364940000	321000000	337930000	175800000	162130000	322500000	174300000	148200000	18886000	11181000	7704600	6631100	3658400	2972700
IDP1	2	15	15	46.7	428	428;420	1.0235	0.98199	1.1588	1.0643	2.946	20821000000	11150000000	9671000000	9030000000	4655800000	4374100000	11532000000	6347300000	5184900000	177920000	103140000	74781000	80802000	43590000	37212000
EUG1	1	9	9	24.4	517	517	NA	NA	1.1587	0.94371	NA	359900000	231700000	128200000	51575000	30435000	21139000	132000000	99713000	32287000	159810000	91730000	68077000	16518000	9817000	6700900
IDH1	1	7	7	26.4	360	360	0.95097	1.0546	1.1585	1.0806	16.569	1426500000	760400000	666060000	434640000	226380000	208260000	771810000	411660000	360150000	156270000	88916000	67349000	63734000	33441000	30294000
YIM1	1	10	10	31.5	365	365	NA	NA	1.158	1.0122	NA	326740000	192510000	134230000	12155000	5556300	6598900	16444000	9667800	6776300	111970000	73403000	38568000	186170000	103880000	82290000
SPF1	1	24	24	27.7	1215	1215	0.96031	0.99592	1.1575	1.0477	10.526	9943800000	5157200000	4786600000	3473500000	1784600000	1688800000	6043900000	3134800000	2909000000	7600700	4567600	3033100	418870000	233170000	185700000
SOP4	1	3	3	13.7	234	234	0.76309	NA	1.1562	1.0484	5.3862	286420000	185530000	100890000	112180000	75000000	37185000	85254000	58677000	26577000	54428000	33553000	20876000	34554000	18299000	16255000
VPH1	1	16	16	18.3	840	840	0.90355	0.98916	1.1547	0.94314	10.14	10143000000	5813100000	4329900000	997760000	630020000	367730000	1781100000	945960000	835150000	2352000000	1399100000	952940000	5012100000	2838100000	2174100000
NCP1	1	16	16	31.3	691	691	0.92033	0.98518	1.1545	1.0144	17.065	3973600000	1967300000	2006400000	1104900000	572870000	531990000	2360700000	1107400000	1253300000	325850000	190010000	135840000	182280000	97031000	85246000
AIM9	1	13	13	24.2	627	627	1.1018	0.99953	1.1535	1.0991	9.1471	4325300000	2396100000	1929300000	1982300000	1106100000	876140000	2291600000	1262500000	1029100000	30215000	16810000	13405000	21195000	10617000	10578000
SUR2	1	7	7	16.6	349	349	1.0442	0.98366	1.153	0.98193	7.5067	1231100000	690260000	540850000	404340000	218910000	185430000	618220000	353820000	264400000	88807000	50555000	38251000	119740000	66967000	52771000
PEP5	1	15	15	18.8	1029	1029	1.0015	1.0459	1.1527	1.038	30.596	485410000	264370000	221040000	123490000	59977000	63518000	193090000	114110000	78982000	66221000	34639000	31581000	102600000	55644000	46959000
VPS41	1	10	10	10.9	992	992	NA	NA	1.1524	0.95811	NA	103610000	59492000	44114000	0	0	0	0	0	0	48581000	28072000	20509000	55025000	31420000	23605000
NOP1	1	9	9	34.6	327	327	0.96999	0.97938	1.1522	0.97327	6.7703	19998000000	10803000000	9194800000	8591500000	4523200000	4068400000	11210000000	6166300000	5043300000	80875000	49304000	31570000	115920000	64275000	51643000
WBP1	1	10	10	24.4	430	430	0.90232	0.99746	1.1521	0.99817	15.129	1750800000	947110000	803650000	586710000	319530000	267180000	719310000	374190000	345110000	261890000	151810000	110080000	182860000	101590000	81270000
BFR1	1	21	21	43	470	470	1.013	0.98578	1.1519	1.0378	9.1482	29606000000	15445000000	14161000000	13513000000	6851300000	6661700000	15438000000	8208100000	7229800000	467400000	278180000	189220000	188180000	107350000	80835000
CDC42	1	4	4	22	191	191	1.0676	1.0044	1.1513	0.95582	3.8352	3142800000	1732200000	1410700000	1233600000	638890000	594750000	1214600000	695610000	518940000	292060000	170790000	121270000	402590000	226870000	175720000
PIM1	1	20	20	24.4	1133	1133	1.2149	1.0788	1.1505	1.0842	18.626	4556900000	2378300000	2178700000	1765200000	914860000	850350000	2782600000	1458000000	1324600000	3409900	2110700	1299200	5661300	3263100	2398200
YCF1	2	22	20	15.8	1515	1515;306	0.98656	1.0651	1.1496	0.97637	24.637	2682700000	1501400000	1181300000	184090000	88008000	96079000	994910000	572110000	422800000	113830000	66111000	47719000	1389900000	775180000	614690000
GPD1	1	10	9	35.3	391	391	1.096	0.89964	1.1495	1.0468	14.243	4036700000	2187700000	1849100000	917960000	472060000	445900000	2824200000	1550300000	1273900000	174160000	99332000	74825000	120410000	66017000	54391000
FMP42	1	3	3	4.4	504	504	NA	NA	1.1477	0.9512	NA	164360000	92517000	71846000	0	0	0	0	0	0	43666000	25370000	18297000	120700000	67148000	53549000
EMP24	1	2	2	16.7	203	203	1.1075	1.0183	1.147	1.0331	3.7952	501680000	272010000	229670000	86191000	38149000	48043000	255170000	144920000	110250000	83605000	46826000	36780000	76710000	42117000	34593000
VHC1	1	11	11	10.4	1120	1120	NA	NA	1.1457	0.98137	NA	500230000	278070000	222160000	0	0	0	0	0	0	79921000	45037000	34884000	420310000	233030000	187280000
VTC3	1	31	30	39.9	835	835	NA	0.72573	1.1448	0.92823	NA	2278400000	1324000000	954410000	0	0	0	44976000	30279000	14697000	952680000	563100000	389580000	1280700000	730610000	550130000
TRM1	1	12	12	32.3	570	570	0.99491	0.87526	1.1443	0.91519	11.643	8134100000	1549700000	6584400000	3784200000	715190000	3069100000	4080600000	714540000	3366100000	155820000	64668000	91155000	113430000	55295000	58136000
SKT5	1	6	6	11.8	696	696	0.77543	1.1299	1.1443	1.0258	14.638	343310000	195050000	148260000	147560000	86699000	60864000	175860000	96978000	78880000	11457000	6559100	4897700	8429300	4811200	3618100
VPS16	1	7	7	12.9	798	798	NA	NA	1.1443	0.97948	NA	56181000	30818000	25363000	0	0	0	33459000	17543000	15916000	2594900	1614900	980010	20128000	11661000	8466900
LEM3	1	4	4	18.6	414	414	NA	NA	1.1439	1.0828	NA	56305000	27215000	29090000	0	0	0	18712000	5808700	12903000	25834000	14996000	10838000	11760000	6410800	5348800
VAM6	1	20	20	23.5	1049	1049	NA	NA	1.1438	1.0029	NA	395240000	225350000	169890000	44641000	30834000	13807000	60152000	32772000	27380000	80914000	46267000	34647000	209530000	115480000	94057000
ALG11	1	2	2	4.2	548	548	NA	NA	1.1437	0.89846	NA	6414200	3687700	2726600	0	0	0	0	0	0	3892900	2239000	1653900	2521300	1448600	1072700
FUM1	1	7	7	18.2	488	488	0.99169	0.97865	1.1432	1.0261	20.453	1898100000	1012800000	885280000	838520000	422060000	416470000	1010300000	562900000	447430000	29124000	17174000	11950000	20075000	10644000	9430800
YLR173W	1	4	4	6.1	608	608	NA	NA	1.1418	0.96289	NA	40489000	23562000	16927000	0	0	0	0	0	0	14414000	8740300	5674100	26075000	14821000	11253000
	1	11	11	37.7	326	326	NA	NA	1.1414	0.96262	NA	758510000	446320000	312190000	0	0	0	88682000	44148000	44534000	254440000	152250000	102190000	415390000	249920000	165470000
VMA6	1	4	4	19.1	345	345	NA	NA	1.1412	0.96302	NA	1090000000	625300000	464700000	0	0	0	0	0	0	603470000	347530000	255940000	486530000	277760000	208760000
	1	3	3	19.1	230	230	0.98807	0.96386	1.1412	NA	4.7928	1199600000	630210000	569370000	569410000	288750000	280650000	594150000	321150000	273000000	22413000	12768000	9645000	13606000	7539000	6067200
FUS3	1	3	3	10.2	353	353	NA	NA	1.141	NA	NA	406510000	225080000	181430000	152030000	79309000	72722000	250350000	143490000	106860000	4127900	2282300	1845600	0	0	0
CIT1	1	5	5	12.9	479	479	NA	NA	1.1401	NA	NA	518070000	296080000	221980000	258550000	138100000	120450000	232350000	142040000	90309000	24910000	14765000	10145000	2260800	1178900	1082000
PPN1	1	8	8	18.1	674	674	NA	NA	1.1401	0.96281	NA	225240000	119260000	105980000	0	0	0	54539000	24659000	29880000	80657000	44574000	36084000	90040000	50023000	40016000
IST1	1	3	3	11.4	298	298	NA	NA	1.1394	NA	NA	98427000	55378000	43049000	38712000	20606000	18106000	56642000	32933000	23708000	3073400	1838800	1234600	0	0	0
MIR1	1	4	4	22.2	311	311	1.4099	0.9894	1.1387	0.92836	23.656	1704700000	889070000	815600000	672710000	335200000	337510000	972540000	519410000	453120000	39394000	23443000	15950000	20027000	11017000	9010700
ATP2	1	10	10	29.5	511	511	1.0187	0.95292	1.1379	1.0615	21.723	3962500000	2193000000	1769500000	1687100000	910950000	776160000	1772700000	996510000	776140000	332810000	195510000	137290000	169910000	90013000	79895000
NAM9	1	8	8	15.6	486	486	1.0755	1.12	1.1376	1.1038	17.692	1250400000	638730000	611680000	512860000	252910000	259950000	724650000	378940000	345710000	5836600	3202200	2634400	7070100	3683900	3386200
MAS2	1	6	6	18.3	482	482	NA	1.3141	1.1374	0.65302	NA	273720000	140570000	133150000	90933000	49063000	41870000	146220000	67461000	78757000	30126000	19733000	10392000	6445000	4310600	2134400
LYS1	1	5	5	19.6	373	373	NA	0.98498	1.1364	1.1247	NA	380970000	215520000	165450000	93843000	51591000	42252000	151590000	82166000	69427000	54536000	29817000	24719000	80993000	51943000	29050000
PHO91	1	17	17	20.8	894	894	NA	0.94124	1.1357	0.96313	NA	1460000000	829320000	630720000	41476000	23438000	18038000	165840000	90777000	75064000	286560000	169500000	117050000	966170000	545610000	420570000
MCR1	1	12	12	46.4	302	302	1.1838	0.99142	1.1349	1.1154	11.958	925840000	338580000	587250000	367770000	180410000	187360000	410550000	75771000	334780000	91040000	52882000	38158000	56479000	29517000	26963000
PDB1	1	3	3	9.8	366	366	1.046	1.057	1.1342	1.1079	1.237	2391000000	1259900000	1131200000	1269900000	663020000	606880000	867540000	448800000	418740000	172990000	105640000	67354000	80599000	42409000	38190000
ERP1	1	7	7	35.2	219	219	0.93955	0.9749	1.1342	1.0006	22.641	1127100000	636250000	490800000	224190000	123770000	100430000	737700000	419420000	318280000	53576000	31315000	22261000	111580000	61753000	49827000
KRE6	1	3	3	8.9	720	720	NA	NA	1.1341	1.015	NA	333790000	176020000	157770000	153340000	73686000	79655000	87512000	46891000	40621000	82723000	49839000	32884000	10214000	5607600	4606400
MPD2	1	3	3	13	277	277	1.0001	0.88815	1.1341	1.0323	7.2692	422790000	218140000	204650000	231270000	115810000	115460000	163390000	86036000	77357000	13447000	7999000	5447500	14683000	8298000	6385100
POM152	1	19	19	18.3	1337	1337	1.0269	1.0307	1.134	0.97671	11.254	2328700000	1052200000	1276500000	691110000	370480000	320640000	1579000000	649080000	929880000	8145500	4386000	3759500	50439000	28241000	22198000
USA1	1	3	3	3.3	838	838	NA	NA	1.1334	NA	NA	31289000	17210000	14079000	12930000	5749900	7179600	12975000	8380300	4595100	3809800	2200300	1609500	1574100	878970	695140
ERG11	1	13	13	34.2	530	530	1.0055	1.0109	1.1333	1.0436	30.389	5301300000	2560000000	2741200000	1944300000	884210000	1060100000	2621900000	1256100000	1365900000	416230000	249190000	167040000	318820000	170580000	148240000
AIF1	1	6	6	16.9	378	378	NA	NA	1.1332	0.95356	NA	117280000	101040000	16236000	0	0	0	0	0	0	51868000	45052000	6815300	65413000	55992000	9421100
CIR2	1	13	13	27.9	631	631	1.1058	1.0093	1.1329	0.99654	18.218	1013600000	544920000	468690000	464940000	249300000	215640000	512480000	275460000	237020000	32372000	18096000	14276000	3811900	2056900	1755000
	1	6	6	16	407	407	1.1125	NA	1.1328	1.0533	7.356	463380000	246470000	216900000	230930000	122640000	108290000	151840000	79379000	72458000	25369000	15008000	10361000	55240000	29449000	25791000
RSM23	1	7	7	16.7	450	450	NA	0.9637	1.1327	1.218	NA	415740000	214370000	201380000	167380000	82527000	84850000	222390000	117980000	104400000	19548000	10603000	8945000	6430400	3252600	3177800
TIM50	1	9	9	25.2	476	476	0.98893	1.0025	1.1325	1.0355	1.6142	2404200000	1292000000	1112200000	1261600000	671660000	589990000	1060900000	575860000	485050000	50157000	27073000	23084000	31458000	17380000	14079000
VAC8	1	11	11	23.2	578	578	1.0046	1.0546	1.1323	0.98778	3.8397	3706500000	2083600000	1622900000	477650000	261650000	216000000	699900000	376390000	323520000	1255400000	740250000	515170000	1273500000	705300000	568240000
MRPL17	1	8	8	28.8	281	281	1.107	1.0456	1.1316	NA	28.168	1484600000	776940000	707680000	594880000	285490000	309380000	885160000	488770000	396400000	3867700	2323700	1544000	711710	360570	351140
ILV5	1	14	14	40.5	395	395	0.97517	0.9135	1.1312	1.017	2.3592	22529000000	12361000000	10168000000	8320700000	4447100000	3873600000	11074000000	6114400000	4959700000	2086400000	1222000000	864390000	1047700000	577300000	470360000
YPR091C	1	9	9	19.9	770	770	1.2489	0.97293	1.1306	1.0409	8.5943	730370000	403440000	326940000	216330000	120460000	95867000	486880000	267970000	218910000	8340500	4645000	3695400	18819000	10356000	8462800
ABF2	1	11	11	60.1	183	183	0.97639	0.98942	1.1302	1.0044	1.9558	4154400000	2330600000	1823700000	1724600000	985040000	739540000	2097200000	1156900000	940250000	170790000	99626000	71167000	161850000	89056000	72790000
PTC7	1	8	8	34.1	343	343	1.0615	1.0312	1.13	1.0084	12.826	393350000	200480000	192880000	190590000	92141000	98451000	151220000	82666000	68554000	30867000	16046000	14821000	20673000	9624000	11049000
SLA1	1	11	11	11.9	1244	1244	0.78858	1.088	1.1299	NA	27.347	1236100000	648870000	587260000	490250000	213470000	276780000	732430000	427490000	304930000	8055300	4712300	3343000	5401800	3196400	2205400
RNY1	1	3	3	10.4	434	434	NA	NA	1.1289	0.92599	NA	75499000	43902000	31596000	0	0	0	0	0	0	31335000	18661000	12673000	44164000	25241000	18923000
HMG2	1	7	4	8.6	1045	1045	NA	1.1715	1.1288	1.0679	NA	187360000	99024000	88333000	56646000	29454000	27192000	107070000	55511000	51564000	13423000	8315600	5107600	10213000	5743300	4470100
YPT10	1	9	9	47.7	199	199	NA	NA	1.1281	0.92901	NA	311250000	173250000	138000000	85296000	48455000	36842000	70824000	37347000	33477000	51274000	29017000	22257000	103850000	58429000	45422000
LCB2	1	8	8	22.5	561	561	0.9788	0.9748	1.1279	1.07	9.9619	1994600000	1096900000	897710000	615840000	340150000	275690000	1258400000	690360000	568010000	58052000	33590000	24462000	62378000	32832000	29546000
KTR6	1	4	4	11	446	446	0.94324	0.95476	1.1279	1.2617	25.923	493950000	261780000	232170000	153630000	83605000	70021000	304450000	159550000	144900000	19195000	10966000	8229600	16688000	7661500	9026600
APE4	1	10	10	32.4	490	490	NA	NA	1.1273	1.0381	NA	303230000	154010000	149220000	60842000	26065000	34777000	71040000	31091000	39949000	102730000	59860000	42872000	68616000	36991000	31625000
GSF2	1	8	8	23.3	403	403	0.97505	1.1258	1.1271	1.0301	7.1053	2167900000	1071600000	1096300000	1060900000	502910000	558030000	928260000	468270000	460000000	135970000	77278000	58695000	42703000	23156000	19547000
PHB2	1	5	5	22.3	310	310	1.0134	1.0942	1.1266	1.0032	9.419	2964000000	1461500000	1502500000	1275900000	631280000	644580000	1679800000	825100000	854690000	4746800	3043600	1703200	3592200	2100800	1491400
	1	11	11	14	816	816	NA	NA	1.1247	1.05	NA	183110000	102180000	80926000	0	0	0	0	0	0	76378000	43117000	33261000	106730000	59064000	47666000
LCB1	1	8	8	17.7	558	558	1.0271	1.0036	1.1245	1.0374	4.6249	3603900000	1907200000	1696700000	1558300000	828670000	729580000	1887800000	991350000	896450000	82245000	46775000	35469000	75609000	40394000	35215000
SEY1	1	16	16	22.7	776	776	1.0303	0.95297	1.124	1.0664	20.841	2985700000	1673300000	1312400000	964150000	570100000	394050000	1870500000	1017600000	852930000	62689000	36659000	26030000	88346000	48901000	39445000
SAC1	1	16	16	32.9	623	623	1.0555	0.94848	1.1239	1.0724	17.678	2146600000	1176000000	970690000	619600000	324980000	294620000	1106100000	610290000	495790000	212390000	125800000	86589000	208570000	114880000	93687000
SEC24	1	8	8	9.3	926	926	1.0193	1.0754	1.1233	1.0108	8.8701	1500300000	809590000	690710000	605230000	324260000	280980000	855310000	465520000	389790000	7774000	4530900	3243100	31975000	15277000	16698000
ERV46	1	3	3	9.2	415	415	0.99689	0.98575	1.1231	0.99236	68.819	2644400000	1458800000	1185600000	1343800000	697570000	646200000	1243900000	728270000	515680000	20089000	12489000	7600300	36578000	20448000	16130000
LRO1	1	8	8	16.8	661	661	NA	NA	1.1231	1.0022	NA	877200000	415930000	461270000	813160000	376170000	436990000	0	0	0	42973000	28419000	14555000	21074000	11345000	9728700
TED1	1	4	4	10.6	473	473	NA	NA	1.1228	0.996	NA	550320000	308100000	242210000	154900000	85217000	69684000	256210000	145290000	110930000	77735000	44182000	33554000	61468000	33419000	28048000
LSC1	1	10	10	41.9	329	329	0.96516	1.0367	1.1228	0.94889	11.267	1313500000	691670000	621840000	330360000	168130000	162230000	821340000	429340000	392000000	102910000	61389000	41524000	58897000	32812000	26085000
ILV1	1	14	14	35.9	576	576	1.0403	1.0356	1.1224	1.0986	13.056	3292000000	1753900000	1538100000	1410000000	730780000	679170000	1750200000	947820000	802370000	114580000	65859000	48724000	17301000	9435500	7865200
MNR2	1	8	8	10.4	969	969	NA	NA	1.1218	1.0141	NA	227390000	127750000	99641000	0	0	0	0	0	0	101510000	59502000	42009000	125880000	68251000	57631000
TMA46	1	8	8	27.5	345	345	0.97757	1.0019	1.1213	NA	6.5118	3700100000	2001500000	1698500000	2001100000	1077300000	923820000	1694100000	921620000	772430000	3790700	2016500	1774200	1161800	639290	522490
FRE1	1	8	8	13.6	686	686	NA	0.93839	1.1199	1.0003	NA	525620000	310270000	215350000	186680000	111890000	74789000	273570000	160770000	112800000	4787100	2703500	2083600	60582000	34900000	25682000
RMD1	1	10	10	24.2	430	430	NA	NA	1.1195	0.99393	NA	484540000	269610000	214930000	39755000	17649000	22106000	0	0	0	128620000	74324000	54294000	316160000	177640000	138520000
GLN1	1	4	4	13	370	370	0.93331	NA	1.1172	NA	26.35	1532200000	867420000	664800000	961590000	562510000	399080000	535350000	284760000	250590000	35277000	20154000	15123000	0	0	0
CYM1	1	11	11	13.5	989	989	1.0201	1.2609	1.1171	1.1183	3.1903	1036400000	502720000	533700000	434030000	214880000	219150000	569490000	269140000	300350000	14122000	8309200	5812900	18772000	10383000	8389000
ADH3	1	13	12	46.1	375	375	1.0321	0.9917	1.117	1.0791	4.8045	3426100000	1832700000	1593400000	1715200000	850770000	864420000	1358400000	780850000	577530000	245680000	143410000	102270000	106900000	57708000	49192000
EMP47	1	8	8	22.2	445	445	NA	1.0788	1.1168	1.0415	NA	725810000	368440000	357370000	72366000	49881000	22485000	628490000	304530000	323960000	15937000	9199200	6737900	9016800	4831900	4185000
ETR1	1	7	7	24.5	380	380	1.0844	1.0244	1.1164	1.01	10.546	1279300000	689350000	589920000	495610000	258840000	236760000	755770000	413600000	342170000	22200000	13741000	8458800	5691000	3167500	2523500
LPD1	1	18	18	42.3	499	499	1.0392	1.0201	1.116	1.1089	6.3432	6415200000	3376200000	3039000000	2829200000	1474700000	1354500000	3281400000	1732100000	1549300000	208050000	117790000	90260000	96493000	51582000	44911000
YCK3	1	10	10	34.5	524	524	0.87659	1.0105	1.116	0.98041	8.0918	2586400000	1465400000	1121000000	129370000	70388000	58980000	206860000	110260000	96605000	862980000	513080000	349900000	1387200000	771660000	615510000
ALT1	1	4	4	12.3	592	592	NA	1.0945	1.116	NA	NA	324220000	229640000	94580000	74267000	41169000	33098000	238490000	181890000	56599000	11465000	6582300	4883000	0	0	0
MDH1	1	8	8	36.5	334	334	1.0096	1.0146	1.1156	1.132	1.901	5520100000	2933400000	2586700000	2183900000	1136100000	1047800000	3264200000	1757400000	1506800000	39153000	22662000	16490000	32840000	17243000	15597000
NDE1	1	15	15	29.1	560	560	0.95523	1.1138	1.1149	1.1164	6.4319	10449000000	5596200000	4853200000	5556000000	2976400000	2579700000	4745400000	2537000000	2208400000	99982000	57728000	42253000	47931000	25011000	22920000
MGM1	1	8	8	13.7	881	881	0.80175	1.0447	1.1147	NA	12.549	295860000	153380000	142480000	37454000	22311000	15142000	250440000	126810000	123630000	7000900	3772200	3228700	965230	483710	481520
MRP7	1	5	5	18.1	371	371	1.0572	1.0557	1.1145	NA	6.5072	1348200000	682610000	665590000	712960000	362080000	350880000	624010000	314210000	309800000	8311300	4837600	3473700	2919600	1482800	1436800
NUP170	1	4	4	3.3	1502	1502	1.0149	1.353	1.1138	0.97433	6.9428	667590000	346500000	321090000	204100000	109610000	94486000	457720000	233590000	224140000	2069000	1269600	799400	3696800	2032200	1664600
MGE1	1	5	5	21.5	228	228	0.94485	0.98717	1.1137	NA	10.417	5702400000	3055200000	2647200000	2838800000	1513700000	1325100000	2859200000	1538800000	1320400000	4357100	2728200	1628900	0	0	0
AIM6	1	4	4	12.8	390	390	NA	0.98658	1.1137	0.97066	NA	441420000	237440000	203980000	64516000	30382000	34134000	350120000	191610000	158510000	16652000	9610500	7041600	10138000	5843800	4294300
NDI1	1	7	7	19.9	513	513	NA	NA	1.1136	1.0435	NA	314820000	204900000	109920000	121550000	69637000	51911000	161870000	117900000	43977000	22794000	12986000	9807600	8600900	4375300	4225600
SHM1	1	16	16	39	490	490	1.0094	1.0105	1.1127	1.1287	9.5784	10855000000	5732800000	5121900000	1797500000	948860000	848610000	8737000000	4608800000	4128200000	229120000	127040000	102090000	91009000	48056000	42953000
GLR1	1	11	11	32.9	483	483	1.0691	1.007	1.1122	0.93969	17.902	4396000000	2309500000	2086400000	2147500000	1110500000	1037000000	2221100000	1183600000	1037500000	8820900	5157900	3663100	18609000	10267000	8342500
PAT1	1	5	5	11.9	796	796	0.94435	0.91168	1.1115	1.0113	5.5637	3217100000	1076700000	2140400000	751750000	403950000	347800000	2270800000	659930000	1610900000	145810000	6014300	139800000	48758000	6796700	41961000
LIP5	1	5	5	20.8	414	414	0.9362	NA	1.1106	NA	7.9002	164780000	86927000	77855000	93224000	49268000	43956000	65301000	34179000	31122000	6255700	3479500	2776200	0	0	0
MCX1	1	5	5	10.8	520	520	0.9989	1.0235	1.1106	NA	3.1482	9108200000	4921700000	4186500000	4086500000	2185600000	1900900000	4859200000	2636300000	2222900000	159770000	98304000	61465000	2728800	1530300	1198500
GET3	1	7	7	26.6	354	354	1.073	1.0244	1.1106	0.69003	83.311	4767000000	2479800000	2287200000	1985200000	950370000	1034800000	2755400000	1513900000	1241500000	20521000	12088000	8432900	5838700	3393800	2444900
MYO5	1	14	12	14.9	1219	1219	1.0391	1.1567	1.1098	0.97749	18.753	1210100000	516550000	693520000	334900000	151040000	183860000	646160000	324900000	321250000	128880000	10432000	118450000	100130000	30168000	69963000
SEC13	1	8	8	38.4	297	297	0.99634	1.003	1.1098	0.89175	17.722	5128200000	2758900000	2369300000	2770600000	1480500000	1290100000	2316700000	1254900000	1061800000	22754000	13565000	9188700	18115000	9889000	8225700
MNS1	1	5	5	13.7	549	549	NA	NA	1.1096	NA	NA	15079000	8484900	6593900	0	0	0	0	0	0	12299000	7095400	5203500	2780000	1389600	1390400
VTC1	1	3	3	17.8	129	129	0.98168	1.0418	1.1093	0.99053	5.8325	2052400000	1156400000	896010000	550320000	300840000	249480000	692800000	388020000	304770000	375500000	229260000	146230000	433780000	238260000	195520000
ALO1	1	8	8	15.4	526	526	0.89868	NA	1.1087	1.0633	7.1445	747130000	421590000	325550000	541770000	296100000	245670000	140260000	88154000	52106000	42031000	24754000	17277000	23071000	12583000	10489000
LYS12	1	6	6	21.8	371	371	1.001	1.0119	1.1075	0.97819	15.257	4920300000	2782500000	2137700000	2196500000	1165100000	1031500000	2679500000	1591500000	1088000000	35221000	20815000	14406000	8992200	5086600	3905600
PET9	2	7	7	19.8	318	318;307	0.98843	0.97655	1.1061	1.0927	3.0989	11008000000	5966800000	5041000000	4948100000	2674000000	2274000000	5927200000	3220000000	2707200000	89713000	49846000	39867000	42749000	22895000	19854000
PHB1	1	6	6	33.1	287	287	NA	NA	1.1056	NA	NA	408740000	205410000	203330000	212520000	102400000	110120000	175070000	90838000	84231000	16026000	9065000	6961100	5123100	3104500	2018600
LAP3	1	8	8	22.8	483	483	1.0568	0.99994	1.1049	0.92786	4.843	2317900000	1261900000	1056000000	917510000	489870000	427640000	1264300000	694450000	569850000	79101000	46273000	32828000	57006000	31327000	25679000
YPT7	1	5	5	25	208	208	1.1507	1.0263	1.1046	0.95283	20.74	2185100000	1154700000	1030400000	497100000	234500000	262600000	485390000	226970000	258420000	481490000	279760000	201720000	721090000	413480000	307610000
COR1	1	8	8	16.8	457	457	0.88676	0.94284	1.1036	1.1506	18.559	1818700000	958080000	860590000	1025400000	531590000	493840000	687040000	366310000	320730000	79603000	45966000	33637000	26598000	14219000	12379000
SEC62	1	7	7	33.6	274	274	NA	1.0287	1.1026	1.0245	NA	705520000	385580000	319940000	156080000	88290000	67790000	246120000	128620000	117500000	124610000	72380000	52235000	178700000	96286000	82417000
SFH5	1	6	6	28.2	294	294	1.0149	0.99864	1.1022	NA	5.1198	2040400000	1086600000	953800000	1068800000	559840000	508950000	960800000	520300000	440500000	6596600	4064400	2532100	4210500	2394800	1815800
EMC1	1	9	9	11.8	760	760	NA	0.95156	1.1016	1.043	NA	192720000	90828000	101900000	28724000	8344700	20380000	46232000	18118000	28113000	65637000	38319000	27318000	52129000	26045000	26084000
SLC1	1	12	12	40.9	303	303	1.0338	1.0059	1.1009	1.0856	10.988	3215800000	1621600000	1594200000	1490000000	743840000	746180000	1447600000	722180000	725450000	112140000	65340000	46801000	165970000	90236000	75731000
	1	8	8	9.1	1036	1036	NA	NA	1.1007	0.94734	NA	133660000	75278000	58381000	0	0	0	0	0	0	43023000	25079000	17944000	90636000	50199000	40437000
VPS29	1	7	7	31.9	282	282	NA	1.3416	1.099	1.018	NA	93198000	46163000	47035000	0	0	0	63087000	29741000	33346000	13705000	7593300	6111600	16406000	8829100	7576600
UBX2	1	3	3	8.4	584	584	NA	NA	1.0983	0.95944	NA	101730000	49685000	52048000	0	0	0	86202000	41684000	44518000	8817600	4591300	4226400	6713700	3409900	3303700
SCS2	1	13	13	59.8	244	244	1.0159	1.0088	1.0981	1.0754	4.7796	31611000000	16919000000	14693000000	15441000000	7994500000	7446400000	15906000000	8773100000	7133200000	187990000	111180000	76810000	76298000	39714000	36584000
MIS1	1	21	21	28.3	975	975	0.95651	0.96713	1.0972	1.1419	2.1793	7523000000	4153100000	3370000000	3902700000	2121300000	1781500000	3434700000	1931700000	1502900000	85796000	49839000	35956000	99826000	50195000	49631000
HMG1	1	18	15	23.1	1054	1054	0.81759	1.0975	1.0971	1.0765	12.626	3492600000	1502800000	1989800000	818770000	450550000	368220000	2309200000	851990000	1457200000	149840000	86104000	63734000	214710000	114110000	100600000
YSP2	1	13	13	12.7	1438	1438	0.86827	1.0078	1.0957	1.0053	23.896	310690000	164270000	146410000	100450000	56297000	44157000	186540000	94960000	91580000	7190000	4252600	2937400	16506000	8765200	7740500
RSR1	1	6	6	26.1	272	272	1.0168	NA	1.0954	1.0159	3.6638	509840000	283310000	226530000	341520000	193440000	148080000	0	0	0	67245000	38885000	28360000	101070000	50981000	50087000
PET123	1	7	7	25.2	318	318	1.1044	1.0156	1.0954	1.254	11.027	10508000000	5318900000	5188700000	4919000000	2302800000	2616100000	5562800000	3001500000	2561300000	15242000	9191100	6050500	10549000	5381800	5166800
MNN1	1	8	8	11.5	762	762	1.0108	0.90755	1.0954	0.83872	54.344	1293100000	676230000	616840000	594380000	285580000	308800000	676550000	377400000	299150000	10893000	6312800	4580000	11249000	6941400	4307900
PEP1	1	19	19	17	1579	1579	1	0.96989	1.0953	0.96457	13.875	1225300000	663770000	561570000	699650000	363600000	336050000	412400000	236080000	176320000	37167000	21906000	15261000	76125000	42191000	33934000
YDR415C	1	3	3	8.8	374	374	NA	NA	1.0944	0.99091	NA	65030000	38131000	26899000	0	0	0	0	0	0	46914000	27941000	18973000	18116000	10190000	7925800
FPR3	1	3	2	11.4	411	411	NA	NA	1.0942	0.92149	NA	1852000000	671480000	1180500000	0	0	0	1830200000	657590000	1172600000	16994000	11090000	5903400	4824000	2798700	2025300
VAR1	1	4	4	8.8	398	398	NA	NA	1.0934	NA	NA	26818000	15248000	11571000	13091000	6973300	6117400	0	0	0	13728000	8274500	5453200	0	0	0
MDM38	1	10	10	20.9	573	573	0.98903	0.97848	1.0911	NA	17.793	4728900000	2641900000	2087100000	2435900000	1350900000	1085000000	2277900000	1281700000	996130000	12170000	7546300	4624100	3035200	1700900	1334300
PHO8	2	11	11	18.2	566	566;486	1.0234	NA	1.0904	0.93142	4.1444	2365300000	1332900000	1032400000	129600000	62873000	66732000	35812000	17595000	18217000	1111300000	652520000	458750000	1088600000	599870000	488720000
TRM44	1	3	3	7.6	567	567	0.9818	1.0537	1.0899	0.92719	13.633	317110000	165340000	151780000	191620000	96866000	94758000	100310000	53542000	46768000	12612000	7672300	4939500	12567000	7257000	5310100
SEC12	1	6	6	17.4	471	471	NA	NA	1.0894	1.0514	NA	194420000	98832000	95585000	60494000	38749000	21745000	83737000	32004000	51732000	17543000	10335000	7208000	32643000	17744000	14899000
RTC1	1	6	6	6.3	1341	1341	1.0653	0.94996	1.089	0.99226	14.053	171320000	101360000	69968000	59377000	32496000	26881000	87855000	56412000	31442000	5770200	3249600	2520700	18322000	9197900	9124500
PEP3	2	19	19	24.3	918	918;622	1.2656	1.3108	1.0888	0.94761	69.253	9330200000	5101400000	4228700000	5430800000	3044400000	2386400000	3758300000	1981500000	1776700000	64453000	33488000	30965000	76680000	42041000	34640000
ADO1	1	9	9	39.4	340	340	1.0781	1.0415	1.0877	1.0587	6.4145	32282000000	17158000000	15124000000	15643000000	8043200000	7599900000	16559000000	9066800000	7492100000	69578000	42218000	27360000	9970100	5513400	4456700
RRF1	1	5	5	23.5	230	230	NA	1.1963	1.0866	1.1201	NA	991530000	493110000	498420000	817270000	400950000	416320000	154540000	80929000	73612000	15325000	8730300	6594900	4396800	2505800	1891000
BPT1	1	21	19	16.4	1559	1559	NA	1.0064	1.0865	0.98857	NA	637670000	348390000	289280000	118420000	56752000	61670000	117370000	62837000	54532000	40625000	24041000	16584000	361250000	204760000	156490000
HSP10	1	5	5	74.5	106	106	1.0885	1.1276	1.0857	1.1953	0.96336	29913000000	15364000000	14549000000	12875000000	6507000000	6367600000	17005000000	8837800000	8166700000	20904000	12576000	8328300	12866000	6804800	6060700
CCC1	1	4	4	8.4	322	322	1.4089	NA	1.0849	0.92797	35.176	637110000	333590000	303520000	134950000	58773000	76173000	135090000	62908000	72183000	55979000	33154000	22824000	311090000	178760000	132340000
YVC1	1	8	8	16.7	675	675	NA	1.0075	1.0841	0.92526	NA	543000000	300500000	242500000	34895000	17589000	17306000	156130000	80390000	75736000	75455000	44182000	31272000	276520000	158340000	118180000
	1	7	7	16	644	644	NA	NA	1.0839	0.9825	NA	415480000	238250000	177230000	0	0	0	0	0	0	168670000	97605000	71068000	246810000	140640000	106160000
HRK1	1	5	5	11.6	759	759	0.98941	1.0453	1.0829	1.1183	23.176	1256500000	644690000	611800000	625270000	311850000	313420000	607180000	319520000	287660000	11851000	6751300	5100100	12190000	6567000	5623400
PMC1	1	30	30	33.8	1173	1173	0.93155	1.0645	1.0819	0.99477	12.861	2248200000	1216900000	1031300000	265230000	144130000	121100000	266470000	143100000	123360000	179380000	101780000	77599000	1537100000	827870000	709230000
	1	3	3	6.5	508	508	1.1332	0.93718	1.0813	0.9796	1.9481	1054800000	578920000	475880000	362080000	185480000	176590000	451350000	252570000	198770000	144520000	86412000	58104000	96858000	54447000	42411000
HEH2	1	8	8	16.6	663	663	1.0156	0.99061	1.0809	0.99031	29.648	2612100000	1398300000	1213800000	1280600000	671700000	608860000	1286100000	700070000	586050000	22301000	13837000	8464300	23138000	12747000	10390000
ARG7	1	12	12	29.3	441	441	0.8963	1.103	1.0807	1.1794	15.33	1163000000	584670000	578310000	593560000	311360000	282200000	537940000	256150000	281790000	18733000	10411000	8322800	12740000	6747500	5992000
PUT2	1	5	5	13.4	575	575	1.1778	1.1226	1.0804	NA	31.869	430630000	238180000	192450000	178880000	100450000	78425000	247530000	135430000	112100000	4222500	2298700	1923800	0	0	0
YGL082W	1	5	5	13.9	381	381	1.0258	0.91222	1.0804	0.98598	10.613	1033400000	591970000	441420000	394330000	227310000	167030000	567530000	323730000	243800000	34399000	19816000	14583000	37127000	21123000	16004000
MIC60	1	6	6	13.1	540	540	1.0586	0.92895	1.0803	NA	36.345	1172500000	596880000	575610000	404020000	197540000	206480000	764510000	396910000	367600000	3356300	2108000	1248300	605640	319990	285650
SRP101	1	20	20	43.8	621	621	1.182	1.0354	1.0783	1.012	27.877	1943500000	1061400000	882090000	463200000	239620000	223580000	1362300000	755850000	606420000	68544000	38747000	29797000	49498000	27214000	22284000
RPL4B	1	10	2	24.9	362	362	1.0308	0.98756	1.0778	1.0719	5.77	6525800000	3739900000	2785900000	2065900000	1106800000	959090000	4394200000	2594600000	1799600000	27662000	17523000	10139000	38024000	20958000	17066000
FAA1	1	34	33	55.3	700	700	1.0129	1.0227	1.0771	0.95986	7.3101	16641000000	9250800000	7390300000	3987900000	2153000000	1834900000	5508300000	2976200000	2532100000	2600000000	1562400000	1037700000	4545000000	2559200000	1985700000
RPL27A;RPL27B	2	9	9	65.4	136	136;136	0.95138	0.972	1.0763	1.0524	6.2287	31571000000	17242000000	14329000000	10483000000	5679800000	4803700000	19883000000	10858000000	9025000000	620510000	379820000	240690000	584200000	324580000	259620000
DPH5	1	2	2	15.3	300	300	0.88022	1.1687	1.0761	NA	8.387	530630000	298080000	232550000	398990000	218930000	180060000	123430000	74351000	49080000	8214300	4804000	3410400	0	0	0
MTC5	1	9	9	9.9	1148	1148	1.012	NA	1.0753	0.96952	1.8838	784170000	399100000	385060000	729300000	367920000	361390000	28803000	16668000	12135000	11764000	6463400	5300100	14298000	8055600	6242000
ILV3	1	16	16	36.1	585	585	1.0337	0.68402	1.074	0.79975	12.592	6356000000	3536800000	2819200000	2605900000	1174600000	1431300000	3397100000	2152200000	1244900000	244390000	143940000	100450000	108590000	66007000	42580000
VAN1	1	2	2	7.9	535	535	NA	NA	1.0716	NA	NA	8149800	4075100	4074600	0	0	0	0	0	0	6064900	2998100	3066800	2084900	1077100	1007800
KRE2	1	8	8	25.3	442	442	1.0124	1.099	1.0708	0.93496	8.2862	3993000000	2028500000	1964500000	1900100000	950790000	949270000	2049800000	1054900000	994860000	22734000	11180000	11554000	20450000	11632000	8817600
YBT1	3	38	38	23.9	1661	1661;1592;771	0.86769	0.95964	1.0707	0.98403	11.233	7370000000	3975000000	3395000000	1304200000	737990000	566240000	1450300000	678340000	771920000	416230000	240800000	175430000	4199300000	2317900000	1881400000
MHP1	1	10	10	9.9	1398	1398	NA	NA	1.0707	1.0012	NA	75144000	41834000	33309000	0	0	0	16146000	8393300	7752900	30051000	17895000	12156000	28946000	15546000	13400000
MRL1	1	2	2	2.9	381	381	NA	NA	1.0702	1.0514	NA	23790000	13925000	9864600	0	0	0	0	0	0	12300000	7342400	4958000	11490000	6583000	4906600
TOM71	1	8	8	18.6	639	639	1.1536	0.99165	1.0696	1.413	12.036	868230000	459020000	409210000	365620000	180010000	185610000	456000000	253610000	202390000	31075000	18009000	13066000	15528000	7385900	8141700
RPS29A	1	3	3	64.3	56	56	NA	NA	1.0695	1.0966	NA	87058000	43149000	43908000	0	0	0	0	0	0	52437000	23613000	28823000	34621000	19536000	15085000
TY1B-ML2;TY1B-OL;TY1B-JR1	3	28	0	27.4	1755	1755;1755;1755	1.0386	0.93161	1.0689	0.9705	43.941	47554000000	25932000000	21622000000	22217000000	11623000000	10594000000	25194000000	14223000000	10971000000	88103000	56038000	32065000	54910000	30482000	24427000
PDA1	1	10	10	35	420	420	1.03	0.99576	1.0688	1.1143	3.5222	6033000000	3262100000	2770900000	2931500000	1554900000	1376600000	2973800000	1636200000	1337600000	88020000	50816000	37204000	39695000	20180000	19514000
RPS18B;RPS18A	2	7	7	50	146	146;146	0.97163	0.98477	1.068	1.0089	1.5286	18670000000	10189000000	8481100000	9139400000	4857000000	4282400000	9400600000	5259200000	4141400000	81858000	46992000	34866000	48197000	25764000	22433000
BAT1	1	8	8	39.2	393	393	NA	0.41328	1.0673	0.39456	NA	914050000	652560000	261480000	0	0	0	812740000	584880000	227860000	51262000	28937000	22324000	50044000	38746000	11298000
TUF1	1	9	9	30.4	437	437	0.98209	0.92758	1.0657	1.1152	3.9411	5375800000	2966500000	2409300000	1953000000	1033600000	919410000	3201600000	1805500000	1396100000	140240000	84335000	55908000	81041000	43142000	37899000
GCV1	1	5	5	19.5	400	400	NA	0.62477	1.0624	0.67652	NA	146070000	94435000	51634000	0	0	0	130000000	84692000	45306000	11761000	6942400	4818600	4309700	2800600	1509000
RPL42B;RPL42A	2	6	6	34	106	106;106	0.93325	0.98787	1.0612	1.0097	4.793	28944000000	15625000000	13319000000	15406000000	8360900000	7045000000	13289000000	7125400000	6163400000	151790000	88517000	63274000	97151000	50116000	47035000
FPR1	1	5	5	62.3	114	114	1.0092	1.0185	1.061	NA	1.0303	28880000000	15717000000	13163000000	12176000000	6458300000	5717900000	16696000000	9253700000	7442300000	7023900	4501500	2522400	949720	450880	498850
YFR006W	1	5	5	11.6	535	535	1.1239	1.2203	1.0605	1.005	2.4	784170000	394380000	389790000	439390000	217210000	222170000	318390000	162330000	156060000	15583000	9322500	6260600	10810000	5515300	5295200
COT1	1	4	4	19.1	439	439	NA	NA	1.06	0.85049	NA	247720000	142400000	105310000	91094000	56642000	34452000	86414000	44212000	42202000	19064000	11480000	7583500	51146000	30069000	21077000
AHP1	1	7	7	46.6	176	176	1.1655	1.0366	1.0586	1.053	5.8859	69083000000	35980000000	33103000000	33544000000	16561000000	16983000000	35299000000	19273000000	16026000000	204150000	125840000	78305000	35855000	19895000	15960000
NPC2	1	5	5	26.6	173	173	NA	NA	1.0586	1.0145	NA	241910000	135630000	106280000	62932000	28699000	34233000	74048000	41840000	32208000	64208000	40362000	23846000	40723000	24727000	15996000
RPL19B;RPL19A	2	8	8	51.9	189	189;189	1.0441	0.9963	1.0578	1.0285	9.5139	35614000000	19147000000	16467000000	17025000000	8981300000	8044000000	14674000000	7926300000	6747500000	1448800000	887370000	561400000	2465600000	1351900000	1113700000
	1	4	4	8.2	711	711	0.82255	NA	1.0577	NA	15.566	357370000	206170000	151200000	164980000	99130000	65847000	190020000	105570000	84454000	2378000	1475500	902410	0	0	0
RMD9	1	4	4	7.7	646	646	1.0837	1.0435	1.0566	NA	7.056	671420000	358780000	312640000	351610000	185390000	166220000	312690000	169280000	143420000	6036300	3482600	2553700	1082200	627270	454880
RSP5	1	5	5	9.3	809	809	NA	NA	1.0563	0.91473	NA	985390000	562010000	423380000	466510000	261290000	205220000	412420000	236920000	175500000	74023000	45682000	28340000	32440000	18114000	14326000
NUP145	1	13	13	14	1317	1317	1.015	0.98264	1.0562	NA	14.255	1731500000	900920000	830530000	601290000	305600000	295690000	1125600000	592770000	532790000	2457000	1581500	875510	2153100	973950	1179100
LEU9	1	10	8	21.9	604	604	0.9507	0.91687	1.056	0.81807	6.2301	913270000	509170000	404100000	232800000	130470000	102320000	623350000	344030000	279320000	18627000	11057000	7569700	38493000	23607000	14886000
SSH4	1	5	5	11.2	579	579	NA	NA	1.0558	0.98408	NA	42213000	20513000	21700000	16568000	6084100	10484000	0	0	0	7055800	3964200	3091600	18589000	10465000	8124100
STE23	1	10	10	12.3	1027	1027	0.99419	0.95612	1.0554	1.0751	7.7826	1425800000	735350000	690450000	461900000	243750000	218140000	631880000	302660000	329220000	44023000	25904000	18119000	288000000	163030000	124970000
IML2	1	4	4	5.2	731	731	NA	NA	1.0553	0.80856	NA	82247000	56103000	26143000	71952000	50044000	21907000	0	0	0	5271900	3031300	2240600	5022800	3027600	1995100
ATG27	1	13	13	53.1	271	271	0.96121	1.0351	1.0543	1.0177	10.33	3973800000	2139400000	1834400000	1137400000	587420000	550000000	1365500000	707190000	658270000	614310000	373300000	241010000	856650000	471530000	385120000
MPD1	1	7	7	20.4	318	318	NA	NA	1.0537	0.98172	NA	71899000	40470000	31429000	0	0	0	0	0	0	35665000	20308000	15357000	36234000	20162000	16071000
RPL37A	1	4	2	48.9	88	88	0.99592	1.0209	1.0533	1.0525	2.9737	5373500000	2876300000	2497200000	3108100000	1640200000	1467900000	2160700000	1175600000	985080000	65524000	39497000	26027000	39116000	20970000	18146000
SIS1	1	14	14	47.7	352	352	1.0933	1.0876	1.0524	1.0273	24.357	16180000000	8283900000	7896500000	7509600000	3717000000	3792600000	8399000000	4411400000	3987600000	132400000	80218000	52187000	139340000	75293000	64051000
DPM1	1	6	6	34.5	267	267	1.0165	0.97078	1.0522	1.0684	11.118	3799200000	2036900000	1762300000	1287600000	689640000	597950000	2357300000	1259000000	1098300000	84834000	49966000	34868000	69467000	38311000	31156000
ARP2	1	6	6	24.6	391	391	0.99996	1.0295	1.0513	0.97166	15.284	1844800000	980400000	864380000	769670000	401680000	368000000	1062700000	571870000	490840000	7037400	3987300	3050100	5348700	2864100	2484600
YPT31	1	8	7	53.8	223	223	0.97552	1.0286	1.0512	0.96559	4.4432	4215700000	2285500000	1930100000	1247000000	624380000	622660000	2766100000	1546500000	1219600000	86563000	51628000	34935000	115980000	63061000	52919000
LOA1	1	6	6	18.7	300	300	NA	NA	1.0502	1.1382	NA	41070000	22565000	18505000	0	0	0	0	0	0	17725000	10081000	7643400	23345000	12484000	10861000
NPR2	1	3	3	8.5	615	615	NA	NA	1.05	0.94726	NA	118070000	71798000	46271000	46763000	29429000	17334000	47714000	28597000	19117000	8271200	5245500	3025700	15321000	8526200	6794500
HFD1	1	9	9	17.3	532	532	NA	NA	1.0492	1.0773	NA	164850000	93195000	71650000	0	0	0	23646000	12676000	10971000	83887000	49023000	34863000	57313000	31496000	25816000
MDG1	1	10	10	42.9	366	366	0.98458	0.99757	1.0485	NA	8.3796	5547400000	2887400000	2660000000	2523000000	1302700000	1220400000	3001700000	1572900000	1428800000	11756000	6426100	5330400	10899000	5407600	5491100
ILV2	1	15	15	32.6	687	687	0.96629	0.78968	1.0483	0.87322	17.262	6761100000	3951700000	2809400000	2362200000	1299000000	1063300000	3945600000	2382600000	1563000000	332200000	198140000	134060000	121050000	72014000	49037000
RPL20B;RPL20A	2	11	11	59.9	172	172;172	0.95453	0.98416	1.048	1.0323	4.3799	92370000000	51443000000	40926000000	47918000000	26310000000	21608000000	44056000000	24906000000	19151000000	228900000	140130000	88769000	166200000	87230000	78966000
MRPL3	1	4	4	11.3	390	390	1.0109	1.069	1.0474	1.1589	7.7023	903220000	481180000	422040000	535750000	289340000	246400000	355130000	184580000	170550000	7929300	4730800	3198600	4418900	2528100	1890800
ATP3	1	6	6	25.1	311	311	0.86515	0.9682	1.0456	NA	39.702	2344800000	1246000000	1098800000	1158000000	605630000	552360000	1176800000	634430000	542320000	10071000	5924400	4146200	0	0	0
LSB6	1	9	9	16.5	607	607	NA	NA	1.0444	0.9499	NA	55733000	30187000	25546000	0	0	0	0	0	0	11032000	6411900	4619700	44701000	23775000	20926000
ERG5	1	12	12	26	538	538	0.85408	0.99811	1.0442	1.052	50.29	543920000	305900000	238020000	181180000	125250000	55931000	277620000	131270000	146350000	44557000	27074000	17483000	40560000	22298000	18262000
RPB5	1	4	4	30.2	215	215	0.97731	0.99743	1.0434	NA	10.731	1814400000	983580000	830810000	826400000	440930000	385470000	985110000	541010000	444100000	2886200	1645900	1240200	0	0	0
ANR2	1	10	10	26.4	516	516	1.097	1.0561	1.0418	0.94275	14.267	861840000	470980000	390860000	341100000	181310000	159790000	355150000	195370000	159780000	85854000	49058000	36796000	79737000	45242000	34495000
RPL12B;RPL12A	2	8	8	62.4	165	165;165	0.9412	0.93129	1.0416	1.0216	5.9409	15118000000	8255000000	6863500000	6475100000	3508300000	2966800000	7302900000	3971800000	3331200000	583190000	356060000	227130000	757170000	418800000	338370000
YHR045W	1	6	6	14.3	560	560	NA	0.86403	1.0409	1.0066	NA	552770000	300690000	252080000	140180000	69032000	71143000	388060000	218120000	169940000	14888000	8191300	6696300	9640800	5345400	4295500
FAT1	1	7	6	13.9	669	669	NA	0.90181	1.0384	1.0521	NA	314980000	184860000	130120000	97540000	55024000	42516000	175010000	106530000	68482000	3284300	1998300	1286000	39147000	21315000	17832000
SAM4	2	3	3	8.9	325	325;105	1.0146	1.1552	1.0384	NA	6.2322	884050000	447780000	436270000	560780000	291920000	268860000	312030000	149600000	162430000	9466100	5508800	3957300	1766400	748680	1017700
BGL2	1	7	7	29.1	313	313	0.98096	0.98906	1.0372	0.93486	10.659	16881000000	9207400000	7673500000	5613600000	2970200000	2643400000	10583000000	5839000000	4744300000	337470000	199210000	138260000	346480000	198920000	147560000
RPP0	1	6	6	22.1	312	312	0.98151	0.98348	1.0368	1.0502	0.85431	4723500000	2546500000	2176900000	1945500000	989410000	956060000	1913800000	1054600000	859260000	516090000	312710000	203390000	348070000	189850000	158220000
RPL10	1	10	10	36.2	221	221	0.9989	1.026	1.0368	1.0396	6.3024	23270000000	12716000000	10554000000	9326200000	5025200000	4300900000	13028000000	7165100000	5863100000	406580000	248320000	158260000	509280000	277690000	231580000
SEC17	1	7	7	27.4	292	292	1.0431	1.0104	1.0359	NA	7.1304	5201500000	2726500000	2475000000	1950500000	990710000	959770000	3237800000	1728000000	1509800000	9555200	6009100	3546100	3709500	1814700	1894800
KES1	1	21	21	48.6	434	434	0.97508	1.0022	1.0351	1.0215	11.815	4169500000	2220300000	1949200000	2206500000	1139700000	1066800000	1590200000	858870000	731300000	252300000	154540000	97755000	120520000	67185000	53338000
VPS13	1	37	37	15.3	3144	3144	1.0684	1.0382	1.0348	0.95659	21.127	7458200000	6136500000	1321600000	1840700000	1498800000	341880000	5496800000	4571600000	925140000	24744000	14815000	9928700	95996000	51309000	44687000
RPL4A	1	10	2	24.9	362	362	1.0011	0.98879	1.0346	1.0491	9.2552	60959000000	32575000000	28384000000	27771000000	14701000000	13070000000	31930000000	17141000000	14789000000	739600000	451950000	287650000	519040000	280890000	238150000
SEC23	1	7	7	11.2	768	768	1.0365	0.98036	1.0345	0.96888	19.566	5419700000	2897300000	2522400000	2310500000	1193200000	1117200000	3067100000	1677900000	1389300000	26722000	17297000	9424500	15427000	8901300	6525500
PRM5	1	4	4	20.4	318	318	NA	NA	1.0336	0.89515	NA	19517000	10908000	8609100	0	0	0	0	0	0	10146000	6217500	3928500	9371300	4690700	4680600
BAT2	1	5	5	22.3	376	376	1.4039	1.2419	1.0331	NA	0.086217	527270000	255150000	272120000	240230000	110070000	130160000	276510000	138460000	138050000	10537000	6620000	3917000	0	0	0
GLT1	1	13	13	7.9	2145	2145	0.86927	0.94156	1.0324	NA	9.2254	6218800000	3296700000	2922100000	2106100000	1185300000	920810000	4101600000	2101800000	1999800000	11090000	9508100	1581600	0	0	0
RPL21B	1	11	2	74.4	160	160	0.98212	0.98848	1.0322	1.0158	1.5018	86806000000	47972000000	38834000000	43460000000	23605000000	19855000000	42475000000	23860000000	18615000000	377710000	229840000	147870000	494130000	277760000	216370000
RPL43B;RPL43A	2	6	6	53.3	92	92;92	0.96327	1.0075	1.0311	NA	2.962	4858800000	2621000000	2237800000	1623700000	894260000	729420000	3182300000	1695800000	1486500000	35135000	21545000	13589000	17693000	9450600	8242600
ATP5	1	6	6	34.9	212	212	1.0018	1.0303	1.0308	NA	6.7282	2866800000	1505400000	1361500000	1406100000	718860000	687190000	1455600000	783350000	672250000	5161200	3139900	2021300	0	0	0
RPL8A	1	21	4	64.1	256	256	1.0076	0.97012	1.0282	1.0008	20.827	8828200000	4649900000	4178300000	4497700000	2317500000	2180200000	4161900000	2239700000	1922300000	62158000	37214000	24944000	106360000	55480000	50884000
MDJ1	1	13	13	29.4	511	511	1.0425	1.1164	1.0275	0.83222	7.0423	1646200000	890240000	755980000	532740000	287330000	245410000	1058500000	570500000	487960000	41091000	24649000	16442000	13925000	7755000	6170500
TIM23	1	3	3	19.8	222	222	1.0313	0.95318	1.0266	NA	6.2288	5327800000	2875500000	2452300000	2674600000	1393000000	1281700000	2645900000	1478200000	1167700000	7227600	4290700	2936900	0	0	0
CIC1	1	11	11	29.8	376	376	0.85281	1.0222	1.0264	0.95014	21.626	867390000	485180000	382220000	293130000	168170000	124960000	535720000	294400000	241320000	21687000	12931000	8755300	16850000	9670700	7179600
RPS9A	1	8	1	55.3	197	197	1.0131	0.98267	1.0235	1.0371	4.3016	31148000000	16937000000	14212000000	10150000000	5361800000	4788200000	20916000000	11527000000	9388800000	46921000	27806000	19115000	35492000	19837000	15655000
RPT2	1	15	15	46.7	437	437	0.99442	1.042	1.0229	NA	13.1	7800000000	4143800000	3656200000	3532300000	1781400000	1750800000	4264500000	2360500000	1904000000	3306700	1909000	1397700	0	0	0
CCS1	1	6	6	33.7	249	249	1.0403	0.99637	1.0224	0.94338	2.58	6261800000	3132000000	3129800000	2750100000	1305400000	1444700000	3492400000	1814800000	1677600000	14923000	9230700	5692600	4374000	2603200	1770700
ERJ5	1	3	3	11.9	295	295	0.9512	0.84349	1.0214	NA	0.475	765160000	437590000	327560000	379470000	205410000	174060000	375970000	226960000	149010000	5526800	2823000	2703800	4190300	2409700	1780600
YOP1	1	5	5	31.1	180	180	0.96778	1.0189	1.0214	1.0339	7.5085	12109000000	6590900000	5518500000	6063700000	3266700000	2796900000	6012600000	3305200000	2707400000	20006000	11841000	8165300	13151000	7148500	6002100
RPS31	1	8	3	58.6	152	152	NA	NA	1.0212	0.98167	NA	278760000	152020000	126740000	136030000	68206000	67824000	0	0	0	83010000	50074000	32936000	59715000	33736000	25979000
RPL24A	1	11	3	41.9	155	155	0.98209	0.97244	1.0207	0.97812	6.0829	50313000000	30340000000	19973000000	22597000000	13054000000	9543700000	26274000000	16447000000	9827000000	775810000	476540000	299270000	666330000	363210000	303120000
YPR063C	1	4	4	34.3	140	140	0.90428	0.93678	1.0206	0.94314	13.906	349280000	195850000	153430000	121760000	67682000	54082000	195620000	110470000	85148000	15393000	8578200	6814300	16502000	9117600	7384800
RIM2	1	2	2	5	377	377	NA	NA	1.0203	NA	NA	340730000	185650000	155080000	168040000	87283000	80753000	168220000	95952000	72265000	4475300	2411000	2064200	0	0	0
RPL2B;RPL2A	2	10	10	50.4	254	254;254	1.0149	1.0296	1.0199	0.99158	9.023	31996000000	17347000000	14650000000	18888000000	10061000000	8826900000	10569000000	5784300000	4785200000	1385900000	852650000	533200000	1153100000	648820000	504270000
RPL5	1	7	7	37.7	297	297	0.99766	0.98623	1.0184	1.0035	13.385	27525000000	15305000000	12220000000	13668000000	7530400000	6138100000	13670000000	7663000000	6006900000	120790000	73454000	47335000	65837000	37661000	28176000
MAP2	1	8	8	25.9	421	421	1.0464	1.0433	1.0183	NA	7.9953	1520400000	767370000	753060000	806910000	403230000	403670000	709080000	361380000	347700000	3529900	2174000	1355900	926760	585360	341400
RPL6A	1	12	8	52.8	176	176	0.99782	1.0213	1.0164	0.90216	11.608	35167000000	19487000000	15680000000	15474000000	8340300000	7133800000	19610000000	11101000000	8509700000	27102000	16383000	10719000	55187000	29734000	25453000
GLC7	1	2	2	6.1	312	312	NA	NA	1.0163	1.0179	NA	20828000	12213000	8615300	0	0	0	0	0	0	11566000	7242900	4323100	9261900	4969800	4292100
TGL1	1	3	3	8.9	548	548	NA	1.026	1.0161	NA	NA	701050000	361750000	339300000	169750000	81810000	87939000	527180000	277750000	249430000	1158000	662480	495570	2962300	1531200	1431100
RPL9A	1	13	3	78	191	191	0.98111	0.97692	1.0155	1.0071	4.0455	48707000000	26198000000	22509000000	25153000000	13242000000	11911000000	22746000000	12480000000	10266000000	416160000	259350000	156820000	392350000	216980000	175360000
LYS4	1	13	13	29	693	693	0.8971	0.97033	1.0139	1.1713	12.769	1652200000	928520000	723660000	660480000	376880000	283590000	957830000	531480000	426350000	22453000	13647000	8806900	11416000	6513200	4903100
SMF3	1	3	3	6.8	473	473	NA	NA	1.0139	0.89791	NA	55890000	33342000	22548000	0	0	0	0	0	0	16673000	10574000	6098600	39217000	22768000	16449000
RPS23B;RPS23A	2	7	7	35.9	145	145;145	1.0119	0.96792	1.0137	1.0077	14.627	4601100000	2524100000	2077000000	1834300000	988100000	846160000	2068400000	1124400000	943990000	394420000	241490000	152940000	303960000	170060000	133900000
NOP56	1	20	18	49	504	504	0.96405	0.9923	1.0131	0.94432	9.9385	17936000000	9702100000	8233500000	7939000000	4286000000	3653100000	9758200000	5275400000	4482800000	129560000	78353000	51208000	108750000	62366000	46380000
MGM101	1	8	8	41.6	269	269	1.0644	1.0273	1.0119	NA	23.719	2222200000	1139300000	1082900000	1202100000	604110000	597950000	1009300000	528820000	480480000	10878000	6402700	4475300	0	0	0
RPL8B	1	25	8	68	256	256	0.96594	0.97972	1.0113	1.0014	6.6761	132440000000	72050000000	60387000000	71908000000	38251000000	33657000000	57768000000	32196000000	25572000000	1081700000	669200000	412530000	1679000000	933520000	745450000
ACT1	1	8	8	29.6	375	375	1.012	1.0066	1.0107	0.94912	4.1948	35563000000	18914000000	16649000000	17796000000	9318400000	8477100000	17246000000	9287900000	7958600000	335610000	202350000	133260000	185870000	105460000	80414000
GPA1	1	12	12	38.6	472	472	1.0021	0.91881	1.0102	0.99435	6.9636	1883000000	1015500000	867540000	882440000	464620000	417830000	877980000	479740000	398240000	48237000	29014000	19223000	74384000	42139000	32245000
FKS1;GSC2	2	15	15	9.5	1876	1876;1895	0.9022	1.0031	1.01	0.96573	9.5264	4664000000	2567700000	2096400000	1380500000	749650000	630870000	3084600000	1703600000	1381100000	15608000	9554200	6054200	183270000	104900000	78373000
RPL11B;RPL11A	2	10	10	50	174	174;174	0.98067	0.98138	1.0098	1.02	2.3223	74361000000	41024000000	33337000000	34043000000	18260000000	15783000000	39516000000	22290000000	17225000000	488070000	297580000	190490000	313870000	176240000	137640000
EHT1	1	11	11	31.5	451	451	1.0423	1.0035	1.0098	1.0054	18.32	2171300000	1172100000	999190000	733280000	381770000	351510000	828950000	437980000	390980000	265760000	159170000	106580000	343270000	193150000	150120000
PTC5	1	6	6	17	572	572	1.1318	0.86273	1.0098	NA	1.1673	339850000	170440000	169410000	169470000	76708000	92765000	157470000	86292000	71183000	10107000	5793000	4314000	2790400	1645100	1145300
YLR225C	1	6	5	19.9	407	407	1.0576	0.85814	1.0095	0.97082	18.035	1103300000	587860000	515390000	526860000	270160000	256700000	525230000	288470000	236760000	28950000	17372000	11578000	22215000	11854000	10361000
AMD1	1	6	6	9.1	810	810	0.94804	0.99483	1.0094	NA	4.6052	1152400000	609890000	542490000	723720000	381930000	341790000	423130000	224360000	198780000	5527700	3603600	1924100	0	0	0
ASC1	1	13	13	50.8	319	319	0.97076	0.99086	1.0094	1.0509	3.8445	61051000000	33342000000	27709000000	32882000000	17711000000	15171000000	27820000000	15435000000	12385000000	226720000	131490000	95232000	122810000	64405000	58403000
GGC1	1	3	3	8.3	300	300	0.99534	1.086	1.0093	NA	2.9735	366770000	190240000	176530000	127590000	63189000	64399000	234240000	124190000	110040000	3903800	2356000	1547800	1041900	502600	539310
NUP100	1	7	7	12.1	959	959	1.0546	0.90532	1.009	NA	73.889	797520000	485230000	312280000	277380000	164990000	112390000	516140000	317830000	198320000	3128200	1890300	1237900	868890	526960	341940
RLI1	1	7	7	14	608	608	0.87106	0.98082	1.0088	1.1052	3.8001	2968100000	1673900000	1294200000	1043000000	580120000	462930000	1904500000	1081000000	823480000	11456000	7633800	3822600	9025700	5067700	3958000
RPL36B	1	8	4	52	100	100	0.98848	0.94914	1.0086	0.98947	11.431	69358000000	38266000000	31092000000	28023000000	15161000000	12862000000	41079000000	22953000000	18126000000	138360000	84665000	53699000	117610000	66924000	50689000
RPL3	1	22	22	58.4	387	387	0.97576	0.9666	1.0082	1.0274	5.9385	29246000000	16065000000	13181000000	11740000000	6275000000	5464700000	15372000000	8544200000	6827600000	1172700000	715350000	457370000	961820000	530470000	431350000
RPS14A;RPS14B	2	4	4	32.1	137	137;138	1.0101	1.0088	1.0081	1.0017	6.7274	35717000000	19415000000	16302000000	16861000000	8997600000	7863000000	18589000000	10263000000	8326100000	137660000	83882000	53777000	130470000	71294000	59176000
FSH1	1	7	7	27.6	243	243	1.074	0.81988	1.0064	0.95862	77.154	1616200000	880290000	735880000	407670000	218710000	188960000	1181800000	646270000	535500000	19933000	11559000	8373900	6794500	3746700	3047800
MNN2	1	15	15	34.7	597	597	1.0062	1.0069	1.0063	0.99424	7.9358	7951400000	4376400000	3575100000	2884500000	1591800000	1292700000	4888200000	2677900000	2210200000	96268000	59023000	37245000	82477000	47637000	34839000
ENO1	1	22	11	49.2	437	437	1.1945	0.95948	1.0062	0.87427	8.7444	41210000000	21965000000	19245000000	20417000000	10093000000	10324000000	20257000000	11542000000	8714300000	427040000	266390000	160650000	108970000	63566000	45399000
ACO2	1	15	13	26.2	789	789	0.96312	1.072	1.0051	1.0811	21.211	715720000	347680000	368040000	299500000	142120000	157390000	375980000	181630000	194350000	33220000	20279000	12940000	7021600	3654000	3367600
RPL33A	1	6	1	52.3	107	107	0.97925	1.0359	1.0048	1.0143	1.7004	25176000000	13589000000	11586000000	11906000000	6373300000	5532800000	12916000000	7017800000	5898300000	167350000	98110000	69236000	186020000	100270000	85751000
RPL7A	1	13	2	54.5	244	244	0.97003	0.98644	1.0047	1.0197	25.132	171660000000	93483000000	78180000000	90453000000	48645000000	41808000000	79782000000	44006000000	35775000000	465070000	288980000	176090000	963690000	543260000	420420000
PRC1	1	9	9	18.2	532	532	NA	NA	1.0033	1.0216	NA	532130000	305730000	226400000	174270000	96222000	78046000	132360000	83791000	48572000	174380000	103370000	71010000	51115000	22346000	28769000
IFA38	1	6	6	20.7	347	347	1.158	1.0612	1.0022	1.0071	12.308	3672100000	1896500000	1775700000	1682700000	867930000	814770000	1960500000	1011800000	948710000	11137000	6834400	4302200	17800000	9926300	7873900
GPM1	1	10	10	48.6	247	247	1.0629	1.0061	1.0017	1.0024	9.0012	161620000000	87093000000	74528000000	78153000000	40892000000	37261000000	79823000000	43999000000	35825000000	2637700000	1648000000	989630000	1007500000	554690000	452800000
RPL16A	1	16	11	53.8	199	199	0.93289	0.98896	1.0017	1.0646	5.9949	48782000000	26787000000	21995000000	24774000000	13453000000	11321000000	23905000000	13274000000	10631000000	60882000	38259000	22623000	42149000	22271000	19877000
RPL15A	1	8	3	45.6	204	204	0.99111	0.98607	1.0006	1.0106	5.8374	57363000000	30353000000	27011000000	30978000000	16306000000	14672000000	25556000000	13559000000	11997000000	420350000	263480000	156860000	408530000	224160000	184370000
TFS1	1	5	5	43.8	219	219	NA	0.90543	1.0005	NA	NA	318560000	159160000	159400000	67994000	29746000	38248000	247780000	127860000	119920000	2785000	1555700	1229300	0	0	0
YDJ1	1	13	13	35.9	409	409	1.0521	1.0553	1.0004	1.0541	6.84	16865000000	8867100000	7997700000	7339000000	3864300000	3474800000	9156500000	4786000000	4370500000	207400000	127760000	79641000	161850000	89052000	72795000
CPR6	1	13	13	36.9	371	371	1.1238	1.1558	1	1.0551	16.038	12686000000	6380000000	6306500000	6428400000	3191800000	3236600000	5909300000	2985500000	2923800000	170630000	102930000	67698000	178100000	99706000	78398000
RPL32	1	8	8	64.6	130	130	0.98344	1.0001	0.99989	0.98989	6.3152	71699000000	39415000000	32284000000	29986000000	16188000000	13797000000	40849000000	22716000000	18133000000	571930000	350730000	221200000	291850000	159550000	132300000
RPL34B	1	7	1	71.9	121	121	0.9647	0.96371	0.99916	1.0427	10.833	11872000000	6760600000	5111500000	3967000000	2221600000	1745300000	7220100000	4141400000	3078700000	366560000	223870000	142690000	318450000	173760000	144690000
PCT1	1	7	7	23.3	424	424	0.94933	1.037	0.99915	1.0281	25.963	759440000	380320000	379120000	383410000	192240000	191170000	319060000	155230000	163830000	29465000	18265000	11200000	27509000	14580000	12929000
RPL16B	1	13	8	47.5	198	198	0.9897	0.99834	0.99902	0.97094	4.4546	78542000000	42617000000	35924000000	43100000000	23259000000	19841000000	35320000000	19288000000	16032000000	52831000	31824000	21007000	69240000	38022000	31217000
RHO5	1	7	7	23	331	331	1.1239	1.0756	0.99887	1.0086	5.3464	1305400000	692420000	612940000	564820000	285020000	279800000	625920000	340510000	285410000	61969000	37871000	24098000	52652000	29018000	23634000
OYE2	1	4	4	12.2	400	400	1.1606	1.0705	0.99851	0.98757	12.826	2649700000	1369500000	1280200000	1065100000	536500000	528580000	1491800000	775070000	716730000	76363000	48952000	27411000	16428000	8952300	7475700
RPS15	1	2	2	15.5	142	142	0.93111	0.96898	0.99808	0.95422	11.402	21921000000	11883000000	10038000000	9306600000	5008700000	4297900000	12475000000	6789400000	5685100000	74288000	47599000	26690000	65471000	37270000	28201000
YHB1	1	13	13	46.6	399	399	0.97561	1.0786	0.99676	1.0902	13.214	32855000000	17483000000	15372000000	15112000000	8215600000	6896900000	17309000000	9003500000	8305400000	382070000	236620000	145450000	51439000	27173000	24266000
CAB5	1	3	3	18.3	241	241	NA	NA	0.99561	0.8503	NA	21512000	13043000	8468600	0	0	0	0	0	0	7540900	4703100	2837800	13971000	8340200	5630800
RPS6B;RPS6A	2	11	11	51.3	236	236;236	0.96258	0.98805	0.99514	1.029	1.0577	60516000000	33864000000	26652000000	24497000000	13344000000	11154000000	34803000000	19790000000	15012000000	518240000	330880000	187360000	698040000	398980000	299060000
BBC1	1	23	23	26.9	1157	1157	1.029	0.99315	0.99388	1.1472	20.375	5221300000	2761100000	2460200000	2295900000	1148700000	1147200000	2910300000	1603300000	1307000000	6426300	4002000	2424300	8666400	5123800	3542600
RPS2	1	9	9	50.4	254	254	0.96424	1.0199	0.99308	1.0278	14.087	2799800000	1526800000	1273000000	1544500000	820970000	723570000	875970000	482860000	393110000	228690000	139610000	89079000	150600000	83358000	67238000
YJU3	1	8	8	35.5	313	313	1.1021	0.99735	0.99294	0.98786	14.014	1426800000	758570000	668270000	501890000	265170000	236720000	588420000	304100000	284330000	92893000	53288000	39606000	243630000	136020000	107610000
MAE1	1	5	5	10.2	669	669	0.83943	0.82366	0.99291	NA	30.802	593650000	381270000	212380000	167740000	106580000	61163000	408750000	264490000	144260000	15114000	8908100	6206000	2039200	1287300	751930
RPL31A;RPL31B	2	6	6	67.3	113	113;113	1.0106	0.96671	0.99222	1.0335	5.2691	9975400000	5323800000	4651500000	5828300000	3078800000	2749500000	3987600000	2152900000	1834700000	81434000	48750000	32684000	78034000	43308000	34726000
RPS1A	1	20	7	71.8	255	255	0.9689	0.99265	0.99143	1.0173	23.403	62421000000	34234000000	28187000000	29981000000	16287000000	13694000000	30262000000	16713000000	13549000000	1190800000	713740000	477090000	986760000	520720000	466040000
LSG1	1	9	9	15.2	640	640	0.9375	0.965	0.99141	NA	36.973	2151800000	1113200000	1038600000	874420000	419260000	455160000	972670000	514360000	458300000	304730000	179560000	125170000	0	0	0
PDR16	1	15	15	47.9	351	351	0.95796	0.95636	0.99138	0.86142	8.8628	4858800000	2672900000	2185900000	1943600000	1030700000	912910000	2658400000	1489800000	1168600000	130170000	77552000	52613000	126580000	74787000	51794000
IMD3	3	12	5	33.7	523	523;157;575	1.0113	1.006	0.99051	0.98905	7.8305	16107000000	8658100000	7448700000	7550000000	3976600000	3573400000	8223100000	4475900000	3747200000	241910000	151490000	90416000	91880000	54181000	37699000
HBS1	1	4	4	10.5	611	611	1.0117	1.1123	0.99008	NA	7.4811	1270800000	722420000	548410000	598440000	342700000	255740000	669140000	377570000	291560000	3248700	2148000	1100700	0	0	0
RPS24B;RPS24A	2	9	9	77.8	135	135;135	0.98849	0.98953	0.98971	1.0398	3.5517	47207000000	26263000000	20944000000	24601000000	13541000000	11060000000	21378000000	12006000000	9371600000	654470000	400600000	253880000	574500000	315470000	259030000
SEC4	1	9	9	55.8	215	215	1.0131	1.0017	0.98851	0.99975	9.0062	7878200000	4218000000	3660200000	3597700000	1831900000	1765800000	3971100000	2203800000	1767300000	129630000	80737000	48893000	179840000	101640000	78196000
YIL108W	1	8	8	14.2	696	696	NA	0.88103	0.98801	0.97115	NA	245540000	135170000	110370000	77876000	39417000	38460000	131950000	75501000	56451000	6762400	3903400	2859000	28949000	16351000	12598000
RPS4B;RPS4A	2	12	12	58.2	261	261;261	0.99843	1.0611	0.98782	1.0242	11.879	1794000000	1027600000	766430000	406040000	220290000	185750000	247130000	141710000	105420000	670450000	409040000	261410000	470400000	256560000	213840000
RPS27B;RPS27A	2	3	3	50	82	82;82	1.0753	1.0056	0.9874	1.0466	0.038089	4285300000	2355300000	1930000000	2259900000	1184400000	1075500000	1242400000	706570000	535860000	526670000	327360000	199310000	256270000	136960000	119310000
PRD1	1	11	11	18.3	712	712	1.1039	0.96545	0.98702	NA	3.6412	6675000000	5602600000	1072400000	602720000	292260000	310460000	6051800000	5303000000	748790000	20524000	7404900	13119000	0	0	0
RPS0A	1	3	2	29.4	252	252	NA	NA	0.98613	NA	NA	13219000	7974800	5243800	0	0	0	0	0	0	9932000	6210800	3721200	3286600	1764000	1522600
VPS1	1	24	24	42.9	704	704	0.97781	1.0023	0.98611	1.0128	16.775	8167100000	4522400000	3644700000	2844100000	1508100000	1336000000	3975300000	2245500000	1729800000	454970000	279490000	175480000	892740000	489340000	403400000
RPL26B;RPL26A	2	13	13	89	127	127;127	0.97881	1.0159	0.98537	1.0543	6.1306	79806000000	43251000000	36555000000	40316000000	21462000000	18854000000	38820000000	21401000000	17419000000	298480000	185890000	112580000	372430000	202200000	170230000
RPL25	1	9	9	57.7	142	142	1.0116	1.018	0.98429	1.0236	6.6287	115940000000	63128000000	52807000000	54845000000	29100000000	25745000000	60371000000	33618000000	26753000000	293950000	178400000	115550000	425060000	231460000	193600000
TDH2	1	20	2	68.7	332	332	1.1037	0.96948	0.98412	NA	33.476	27406000000	14566000000	12841000000	12136000000	6195800000	5939800000	14994000000	8200500000	6793100000	214780000	134550000	80226000	62251000	34740000	27510000
APE2	1	21	21	31.8	952	952	1.0187	0.97381	0.9836	1.0072	22.334	5960300000	3171100000	2789100000	3043000000	1608300000	1434700000	2875000000	1537300000	1337700000	38084000	22885000	15199000	4126600	2583000	1543600
RPL17B;RPL17A	2	8	8	57.1	184	184;184	0.98496	1.0136	0.98293	1.0337	5.9755	46409000000	25183000000	21225000000	22284000000	11858000000	10427000000	23411000000	12904000000	10508000000	314140000	192590000	121550000	399100000	229370000	169720000
RPS20	1	11	11	76.9	121	121	0.98716	1.0122	0.98191	1.0075	8.4981	126100000000	69923000000	56174000000	63703000000	34867000000	28835000000	61273000000	34405000000	26868000000	653040000	395250000	257790000	469160000	255320000	213840000
KTR1	1	5	5	15.3	393	393	0.99681	1.0273	0.9819	0.8768	10.877	728330000	402340000	325990000	374770000	205460000	169320000	316880000	173560000	143330000	15905000	10488000	5417100	20768000	12839000	7928500
TPI1	1	10	10	72.2	248	248	1.0011	0.9112	0.98184	0.9918	7.738	75304000000	41407000000	33897000000	36702000000	19736000000	16966000000	37292000000	20877000000	16415000000	916330000	569420000	346910000	393280000	224360000	168910000
SSZ1	1	18	18	45.5	538	538	1.0122	0.97482	0.98022	0.9727	1.5677	15060000000	8987400000	6072400000	8736200000	5627000000	3109200000	6177200000	3272900000	2904300000	94915000	58706000	36210000	51442000	28743000	22698000
NOP7	1	14	14	25.6	605	605	1.0001	1.0211	0.97987	1.4737	6.5769	8930400000	4990400000	3940000000	3757100000	2095900000	1661200000	5144000000	2875700000	2268200000	20218000	14715000	5502500	9135400	4088000	5047400
RPL35B;RPL35A	2	9	9	47.5	120	120;120	1.0171	1.0248	0.97984	1.0218	6.8775	52653000000	29255000000	23398000000	18988000000	9899900000	9087900000	33248000000	19116000000	14132000000	129810000	80164000	49646000	287360000	158970000	128380000
PPZ1	1	10	10	24.4	692	692	0.87027	0.93603	0.97895	1.0024	2.6248	467600000	239890000	227700000	108440000	45427000	63008000	322440000	170020000	152420000	15158000	8998800	6159200	21560000	15448000	6112200
DBP2	1	5	5	11.2	546	546	0.95973	1.0423	0.97834	NA	6.055	3869700000	2129300000	1740400000	2246700000	1244800000	1001900000	1608400000	875070000	733360000	14577000	9512200	5064300	0	0	0
NOP58	1	17	15	43.6	511	511	0.97814	1.0275	0.97765	0.92484	12.148	19557000000	10924000000	8633500000	8081600000	4354200000	3727500000	11356000000	6499200000	4857300000	66920000	39208000	27712000	52393000	31367000	21026000
FAS2	1	64	64	43.3	1887	1887	1.0512	1.0007	0.97754	1.0606	10.685	114990000000	60679000000	54314000000	48650000000	25336000000	23314000000	66034000000	35191000000	30844000000	60717000	37003000	23715000	247750000	115100000	132650000
RPS1B	1	19	6	71.8	255	255	0.97614	1.0392	0.97749	1.0028	6.7582	11482000000	6302300000	5179800000	5299400000	2789000000	2510400000	6045300000	3436800000	2608600000	35948000	22271000	13677000	101320000	54220000	47104000
RHO4	1	6	6	30.6	291	291	1.0904	1.0957	0.97715	0.95722	0.40333	92426000	48421000	44004000	26733000	12896000	13838000	50406000	26320000	24086000	10299000	6374200	3925000	4987600	2831900	2155700
RPS8B;RPS8A	2	10	10	41.5	200	200;200	0.99272	0.97619	0.97683	1.002	6.4463	19662000000	10943000000	8719000000	9051900000	4904400000	4147500000	10199000000	5795100000	4404400000	245990000	153340000	92657000	164880000	90393000	74490000
ARC35	1	3	3	12.9	342	342	NA	NA	0.97631	1.2008	NA	11289000	6528500	4761000	0	0	0	0	0	0	6519700	3994200	2525500	4769800	2534200	2235500
SHR3	1	2	2	7.6	210	210	0.94959	1.037	0.97594	0.98218	1.5151	2198800000	1208900000	989860000	1049000000	576610000	472370000	1109200000	609890000	499340000	11200000	6549400	4650900	29393000	15894000	13499000
AYR1	1	5	5	20.2	297	297	1.0657	0.98245	0.97589	0.96935	5.165	974640000	521110000	453530000	433650000	231610000	202040000	469290000	248240000	221050000	19009000	11846000	7163400	52692000	29417000	23275000
STE3	1	7	7	13.6	470	470	NA	0.58515	0.97584	0.9021	NA	297380000	192240000	105140000	0	0	0	204850000	137130000	67713000	50814000	31284000	19530000	41722000	23825000	17897000
SSA1	1	35	12	66.8	642	642	1.1771	1.3043	0.97543	1.2855	7.5542	57850000000	28233000000	29617000000	25564000000	12331000000	13234000000	31815000000	15626000000	16189000000	365430000	225310000	140120000	105070000	50835000	54231000
CAF20	1	5	5	28	161	161	0.96596	0.95698	0.97543	NA	11.816	8355100000	4605300000	3749800000	3204600000	1735700000	1468900000	5148300000	2868300000	2280000000	2238900	1318200	920680	0	0	0
RPL24B	1	10	2	41.9	155	155	0.9488	1.0011	0.97528	0.91614	13.684	9230700000	5082100000	4148500000	3690000000	2008200000	1681800000	5473900000	3033800000	2440200000	33415000	20865000	12550000	33282000	19258000	14024000
BNA4	1	3	3	9.8	460	460	0.96487	0.99866	0.97518	NA	3.4384	708240000	373890000	334350000	133310000	66179000	67130000	571880000	305850000	266030000	3054900	1862600	1192300	0	0	0
RPL6B	1	15	11	60.2	176	176	0.98852	1.0021	0.9748	1.0103	10.687	147340000000	81344000000	65998000000	69258000000	38565000000	30693000000	77700000000	42565000000	35135000000	139130000	84025000	55101000	243990000	129870000	114130000
RPS3	1	6	6	23.3	240	240	0.97519	0.95195	0.97421	1.0173	1.6648	62220000000	34131000000	28089000000	32168000000	17225000000	14943000000	29846000000	16782000000	13064000000	170670000	104940000	65733000	34743000	18457000	16287000
MON1	1	3	3	5.4	644	644	NA	NA	0.97351	NA	NA	22577000	12375000	10202000	0	0	0	9959500	4833900	5125600	8926000	5460500	3465500	3691500	2080800	1610800
RVS167	1	6	6	14.1	482	482	1.0768	0.98502	0.97277	0.86981	18.877	1622700000	824180000	798520000	605190000	291050000	314140000	1001400000	523510000	477860000	6497200	4004900	2492300	9645200	5620600	4024600
SWH1	1	6	6	7	1188	1188	NA	0.99788	0.9723	1.0501	NA	288090000	156480000	131610000	64705000	33615000	31090000	178810000	96047000	82762000	27621000	17548000	10074000	16957000	9273000	7683600
IMD4	1	9	6	22.3	524	524	0.93324	1.0306	0.9718	0.97838	1.3988	1987000000	1086100000	900840000	994760000	539920000	454840000	897370000	490270000	407100000	58881000	35931000	22949000	35954000	19999000	15954000
HMX1	1	2	2	10.7	317	317	NA	NA	0.97155	NA	NA	7622600	4222500	3400000	0	0	0	0	0	0	5601000	3366700	2234300	2021600	855870	1165700
SLG1	1	3	3	12.2	378	378	0.8177	0.87612	0.97149	0.8747	1.3675	450380000	242710000	207670000	205380000	111650000	93736000	205650000	106700000	98952000	14314000	9386600	4927800	25034000	14975000	10058000
GPT2	1	7	7	12.8	743	743	NA	NA	0.97109	0.96495	NA	147540000	80422000	67117000	59232000	33394000	25838000	56613000	28043000	28571000	10286000	5106300	5179200	21409000	13879000	7529400
RPS29B	1	3	3	64.3	56	56	NA	NA	0.97104	1.1675	NA	7686500000	4150200000	3536200000	4420500000	2332700000	2087800000	3238700000	1801600000	1437100000	13973000	8785600	5187200	13284000	7154900	6128800
TIF4631	1	27	26	36.8	952	952	0.93411	0.98899	0.97099	NA	12.163	24572000000	13387000000	11185000000	12052000000	6489300000	5562900000	12476000000	6871200000	5605000000	36735000	22331000	14404000	6720300	3764700	2955600
SYP1	1	13	13	24.4	870	870	0.92672	0.88455	0.97079	0.99699	30.127	2190500000	1132200000	1058300000	1111800000	568140000	543680000	1047800000	546390000	501390000	12545000	7667000	4877600	18329000	9968400	8360700
PMR1	1	7	7	9.4	950	950	0.8619	1.021	0.97049	NA	17.806	1401600000	769160000	632430000	190020000	119480000	70536000	1206600000	646670000	559900000	3099600	1944300	1155300	1904000	1061900	842110
IVY1	1	4	4	16.3	453	453	NA	NA	0.96991	0.85147	NA	12011000	7178100	4832700	0	0	0	0	0	0	5319400	3080300	2239000	6691400	4097700	2593600
PAB1	1	28	28	54.2	577	577	0.98637	0.98669	0.96972	0.9954	6.0844	80436000000	43804000000	36632000000	38069000000	20633000000	17435000000	41418000000	22601000000	18817000000	621730000	385560000	236160000	327490000	184220000	143270000
RPS11B;RPS11A	2	9	9	39.7	156	156;156	0.95965	0.99058	0.96948	1.0214	4.4337	114870000000	64180000000	50693000000	54567000000	30139000000	24427000000	59720000000	33700000000	26019000000	270110000	168410000	101710000	316400000	171720000	144690000
HYR1	1	5	4	24.5	163	163	1.1279	0.98805	0.96943	1.1283	8.9146	3633500000	2058700000	1574900000	1695600000	967700000	727910000	1926700000	1084700000	841980000	4791100	2933300	1857900	6408100	3301400	3106700
YGR054W	1	10	10	20.4	642	642	0.93493	0.98503	0.96841	1.1232	19.28	7004400000	3831500000	3172900000	3098900000	1683600000	1415200000	3895400000	2141800000	1753600000	6706700	4340000	2366700	3368300	1694300	1674000
RPS5	1	8	8	40.4	225	225	0.9921	0.96257	0.96825	0.96211	2.9497	27324000000	14934000000	12390000000	12025000000	6341500000	5683700000	15070000000	8452600000	6617600000	138960000	89176000	49783000	89682000	50619000	39064000
HOM3	1	7	7	16.3	527	527	1.0437	1.0551	0.9681	NA	22.232	2013200000	970830000	1042300000	902640000	405760000	496880000	1102700000	560940000	541800000	6554700	3588800	2966000	1236000	545730	690290
YPT1	1	6	6	23.3	206	206	1.0135	0.96807	0.96642	0.95869	2.6761	9189100000	4942500000	4246600000	4056800000	2107900000	1948900000	4909600000	2706000000	2203600000	85570000	52452000	33118000	137090000	76120000	60966000
ADE3	1	18	18	26.1	946	946	0.92811	0.87388	0.96615	1.0119	28.795	8161000000	4677400000	3483600000	3113200000	1774400000	1338800000	4924400000	2830300000	2094100000	58969000	36922000	22047000	64540000	35791000	28749000
PGA3	1	5	5	18.6	312	312	NA	NA	0.96594	0.98431	NA	837530000	436520000	401010000	457030000	264390000	192650000	344380000	151960000	192420000	8120300	4752100	3368200	27995000	15424000	12571000
TDH3	1	21	4	71.1	332	332	1.0162	0.97259	0.96565	1.0083	5.7281	453220000000	246560000000	206660000000	196970000000	103330000000	93646000000	233030000000	129010000000	104010000000	17683000000	11155000000	6528100000	5533300000	3063800000	2469500000
UTP9	1	6	6	14.6	575	575	1.1361	0.94034	0.96532	NA	11.073	1995200000	1077000000	918270000	791450000	420290000	371160000	1042100000	568730000	473400000	2972800	1808100	1164700	158700000	86143000	72554000
CDC48	1	19	19	29	835	835	1.0397	0.97259	0.96494	0.9636	6.4865	29205000000	15537000000	13668000000	11406000000	5808900000	5596800000	17657000000	9643500000	8013500000	72203000	45411000	26792000	69800000	39112000	30688000
SEC18	1	12	12	20.6	758	758	0.94985	0.95899	0.96309	0.93962	9.1592	1954600000	1014700000	939880000	830830000	426300000	404530000	1005900000	519210000	486690000	46229000	29767000	16462000	71643000	39436000	32207000
ADH6	1	9	9	35	360	360	1.1776	0.77844	0.96308	NA	4.7349	544550000	284010000	260540000	225070000	114810000	110260000	264530000	134510000	130020000	54285000	34338000	19946000	673390	361740	311650
TCB2	1	20	20	22.9	1178	1178	0.92409	0.95579	0.96276	1.0155	17.478	1527800000	801530000	726300000	332600000	187920000	144680000	1056200000	537350000	518890000	7277900	4263300	3014600	131710000	71998000	59707000
RPL28	1	11	11	55.7	149	149	0.96589	1.0003	0.96253	0.94759	2.481	55313000000	30466000000	24848000000	22391000000	12118000000	10273000000	31796000000	17699000000	14097000000	456560000	278720000	177840000	669690000	369780000	299910000
ATF1	1	3	3	7.4	525	525	1.0007	NA	0.96234	0.90435	51.288	157540000	91321000	66224000	91196000	52385000	38812000	52302000	30842000	21460000	6506200	4170400	2335800	7540100	3924000	3616100
LCB4	1	20	20	43.6	624	624	1.0505	1.1263	0.96218	0.99346	14.7	1664900000	908620000	756240000	567690000	287500000	280200000	650960000	360810000	290150000	194350000	120430000	73919000	251850000	139880000	111980000
CPR1	1	11	10	55.6	162	162	1.069	1.0465	0.96214	1.0096	5.2264	84923000000	45364000000	39559000000	41927000000	21911000000	20016000000	42600000000	23248000000	19352000000	274200000	144080000	130130000	121590000	60664000	60926000
TEF1	1	19	19	42.8	458	458	0.93707	0.94001	0.96205	0.98546	10.057	93516000000	51068000000	42448000000	35081000000	18434000000	16646000000	49572000000	27416000000	22156000000	4221600000	2678700000	1542900000	4642100000	2539500000	2102700000
TGL4	1	5	5	8.7	910	910	NA	NA	0.96174	1.0417	NA	19281000	10589000	8692200	0	0	0	0	0	0	4785100	2976200	1809000	14496000	7612400	6883300
RTG2	1	4	4	7.8	588	588	1.0626	0.62504	0.9614	NA	12.427	750330000	429020000	321300000	221370000	112350000	109010000	350740000	212600000	138150000	64459000	39104000	25354000	113760000	64966000	48791000
NIT3	1	6	6	29.2	291	291	NA	NA	0.95993	0.93487	NA	139490000	80193000	59300000	0	0	0	97937000	55630000	42308000	29259000	17583000	11675000	12296000	6979700	5316700
RPL1B;RPL1A	2	9	9	35.5	217	217;217	1.0059	1.0298	0.95898	1.045	4.6386	78613000000	43738000000	34875000000	34664000000	18620000000	16044000000	43546000000	24884000000	18662000000	189150000	115950000	73201000	212870000	117670000	95206000
ENO2	1	30	19	64.5	437	437	1.0256	1.0175	0.95872	1.0039	7.0185	684130000000	373630000000	310500000000	285040000000	150630000000	134410000000	380750000000	211860000000	168890000000	14793000000	9189000000	5604200000	3546600000	1951400000	1595200000
RPS7A	1	15	7	76.3	190	190	0.96852	0.99362	0.9581	1.0531	12.55	31253000000	17206000000	14047000000	16439000000	9015600000	7423000000	14578000000	8050500000	6527300000	147770000	91130000	56635000	88677000	49118000	39559000
GAR1	1	5	5	21	205	205	0.93335	1.0844	0.95788	0.98039	2.2426	2211400000	1196300000	1015100000	1241700000	675220000	566530000	951650000	510530000	441110000	9320200	5798400	3521800	8651000	4760500	3890500
RPS16B;RPS16A	2	12	12	64.3	143	143;143	1.0149	0.99334	0.95729	1.0087	12.7	36360000000	20009000000	16351000000	18273000000	9776000000	8497100000	17712000000	10019000000	7693500000	169280000	107230000	62051000	205670000	107040000	98622000
RKI1	1	5	5	30.2	258	258	1.0527	1.0514	0.95659	NA	11.949	5648100000	3241200000	2406900000	2204000000	1133100000	1070900000	3426800000	2097300000	1329500000	15313000	9863600	5449000	1999000	965870	1033100
VBA4	1	11	11	14.6	768	768	1.0738	1.0271	0.95609	1.0393	57.12	657560000	362680000	294880000	172950000	95819000	77126000	287100000	155790000	131320000	61438000	37512000	23926000	136070000	73563000	62509000
MAP1	1	9	9	34.9	387	387	0.95827	0.9976	0.9552	1.0296	5.794	12349000000	6594800000	5753900000	6019800000	3165100000	2854700000	6310300000	3419300000	2891000000	9942900	6191300	3751600	8653100	4239800	4413300
VAM3	1	6	6	35.7	283	283	1.199	1.7662	0.95413	0.90909	10.883	304850000	160540000	144310000	79977000	40104000	39873000	92212000	40835000	51377000	45596000	28014000	17583000	87061000	51585000	35476000
CKB1	1	3	3	12.2	278	278	NA	NA	0.95392	NA	NA	13316000	7907300	5409100	0	0	0	0	0	0	9836000	5868600	3967400	3480400	2038700	1441700
DBP5	1	11	11	24.5	482	482	1.0225	0.97545	0.95345	0.93703	9.7927	17540000000	9554100000	7986400000	7514700000	3994800000	3519900000	9591500000	5311900000	4279600000	11642000	7428300	4214000	422660000	239920000	182740000
TCP1	1	11	11	25.4	559	559	1.0199	1.0114	0.95249	NA	9.341	7480400000	2711400000	4769000000	4215300000	940190000	3275100000	3238000000	1754000000	1484000000	22682000	14387000	8294700	4396400	2819600	1576800
MNN5	1	9	9	25.1	586	586	0.97204	1.0754	0.95234	0.94359	15.986	648100000	345770000	302330000	227790000	129440000	98342000	326150000	163220000	162930000	56913000	32730000	24183000	37256000	20376000	16880000
UBC4;UBC5	2	2	2	14.2	148	148;148	1.0747	1.0449	0.95063	NA	0.10482	1625900000	867230000	758690000	694390000	362570000	331820000	904670000	487510000	417160000	26860000	17150000	9710600	0	0	0
DLD3	1	10	9	22.6	496	496	1.0939	0.92212	0.95056	1.0783	11.181	9409900000	5279400000	4130500000	3416200000	1888300000	1527900000	5892400000	3328300000	2564000000	90547000	56588000	33959000	10792000	6204300	4587400
RPS22B;RPS22A	2	5	5	47.7	130	130;130	0.9363	0.91312	0.94829	0.99506	7.6852	3900300000	2210300000	1690000000	1035100000	594700000	440430000	2801200000	1578000000	1223300000	38741000	23719000	15023000	25226000	13936000	11291000
ACC1	2	36	36	19.6	2233	2233;2273	1.0955	0.99422	0.94758	0.99522	9.577	39836000000	20278000000	19557000000	17860000000	8635800000	9223900000	21677000000	11473000000	10204000000	131850000	80469000	51379000	166660000	88848000	77813000
RPS13	1	5	5	42.4	151	151	0.93074	0.99628	0.94659	1.0375	1.1557	678550000	391560000	286990000	213090000	123360000	89736000	363980000	207020000	156960000	74039000	45863000	28176000	27441000	15329000	12112000
FAS1	1	45	45	28.1	2051	2051	1.0321	0.97944	0.945	1.0725	7.1873	49372000000	26387000000	22985000000	18500000000	9600400000	8899600000	30576000000	16627000000	13948000000	81401000	50843000	30558000	215440000	108510000	106930000
YKT6	1	9	9	47	200	200	1.0324	0.95833	0.94398	1.0868	29.883	4664800000	2545500000	2119300000	2149000000	1129400000	1019600000	2379500000	1334700000	1044800000	82563000	51587000	30977000	53793000	29806000	23987000
RPL18B;RPL18A	2	3	3	27.4	186	186;186	0.89426	0.89433	0.94384	1.0452	13.622	19819000000	11569000000	8249400000	6336500000	3467300000	2869200000	13125000000	7894300000	5230200000	229630000	137680000	91947000	127920000	69840000	58080000
CKA2	1	6	6	19.8	339	339	0.86806	0.84104	0.9437	NA	15.296	583120000	347980000	235130000	318640000	195630000	123000000	251650000	144520000	107120000	12829000	7824700	5003900	0	0	0
RPL13B;RPL13A	2	5	5	22.1	199	199;199	1.0093	1.616	0.94367	1.0527	5.385	2615400000	1385200000	1230200000	1108600000	585500000	523110000	1104800000	590120000	514700000	155390000	82410000	72983000	246580000	127220000	119360000
ARO1	1	18	18	15.7	1588	1588	0.98001	1.0038	0.94336	1.0345	6.534	3217700000	1694200000	1523500000	1304400000	664550000	639830000	1894600000	1019500000	875100000	3752400	2141800	1610600	14984000	8014700	6969300
MBF1	1	7	7	57	151	151	1.0382	1.0383	0.94285	1.1026	11.336	10734000000	5798800000	4935700000	5500700000	2910200000	2590500000	5094300000	2808100000	2286200000	41428000	26670000	14758000	98116000	53825000	44290000
RNR4	1	9	9	25.8	345	345	0.96849	0.98955	0.94276	NA	4.5975	27810000000	15119000000	12691000000	12774000000	6800800000	5973300000	15016000000	8305800000	6710600000	19385000	12303000	7081400	0	0	0
RPS19B;RPS19A	2	8	8	71.5	144	144;144	0.97154	0.99665	0.94211	1.0211	3.2728	5628800000	3074700000	2554100000	2646500000	1400400000	1246000000	2455600000	1365000000	1090600000	292960000	181680000	111270000	233680000	127570000	106110000
NPT1	1	15	15	43.1	429	429	1.0636	0.9555	0.94047	0.89565	16.807	3325400000	1782900000	1542500000	1169800000	588300000	581530000	2098900000	1163600000	935350000	50009000	27081000	22927000	6661500	3952200	2709400
RPS10A;RPS10B	2	4	4	39	105	105;105	0.99341	1.0113	0.94047	NA	1.0233	7404300000	3945700000	3458600000	3131300000	1646700000	1484700000	4249900000	2285800000	1964100000	17656000	10307000	7349100	5372700	2919400	2453300
PST1	1	2	2	7.4	444	444	NA	NA	0.93884	0.97265	NA	3783600	2161800	1621800	0	0	0	0	0	0	2487900	1509900	978020	1295700	651940	643760
CRP1	1	19	19	52	465	465	0.98171	1.013	0.93792	0.99654	13.446	12271000000	6658800000	5612000000	5627300000	3124200000	2503100000	6112200000	3293300000	2818800000	190830000	120310000	70526000	340470000	120960000	219510000
FRE8	1	3	3	5.1	686	686	NA	NA	0.93733	0.91135	NA	22881000	12779000	10102000	0	0	0	0	0	0	5444000	3194800	2249200	17437000	9584100	7853000
	1	3	3	5.6	611	611	NA	NA	0.93715	1.0299	NA	48052000	26490000	21563000	0	0	0	0	0	0	12468000	7281100	5186400	35585000	19209000	16376000
MCK1	1	3	3	12.8	375	375	0.93654	1.0746	0.93663	NA	7.1602	1419800000	775730000	644110000	545060000	291970000	253090000	864940000	477820000	387120000	7056000	4395600	2660400	2779300	1537000	1242400
GAS3	1	9	9	16	524	524	0.95055	1.0315	0.93639	0.91824	3.0035	3021100000	1629800000	1391200000	1062900000	572960000	489930000	1913600000	1030500000	883110000	14752000	9399700	5352600	29879000	17032000	12847000
PGI1	1	17	17	41	554	554	1.0378	0.99497	0.93611	0.96701	13.082	65189000000	35168000000	30021000000	30564000000	15999000000	14564000000	33178000000	18275000000	14903000000	1147600000	726300000	421260000	299780000	167310000	132460000
PNC1	1	4	4	27.3	216	216	1.1829	1.0847	0.93606	0.91982	11.573	4316700000	2211700000	2105000000	2116100000	1032300000	1083900000	2146600000	1146500000	1000100000	30146000	19092000	11054000	23903000	13872000	10031000
RVB2	1	6	6	14.9	471	471	0.99319	1.0417	0.93606	1.2618	5.3632	4004600000	2075700000	1928900000	1684700000	868930000	815760000	2121500000	1195200000	926330000	193340000	8785800	184560000	5051400	2792200	2259200
DUG1	1	13	13	33.9	481	481	1.0229	1.0516	0.9338	1.0462	7.5894	4905800000	2557200000	2348500000	2422000000	1249600000	1172400000	2338400000	1218200000	1120200000	128870000	80335000	48540000	16420000	9096300	7323300
SRO9	1	10	10	33.6	434	434	0.99304	1.0254	0.9333	1.2018	4.4337	20054000000	10853000000	9200700000	9128200000	4853700000	4274500000	10895000000	5981500000	4913700000	20916000	12842000	8073900	9473700	5038100	4435700
TGL5	1	8	8	15.5	749	749	0.86137	NA	0.93312	1.1348	2.0147	127880000	60412000	67464000	106270000	47966000	58302000	0	0	0	6819500	4413500	2405900	14788000	8032000	6755800
SEC14	1	10	10	43.1	304	304	1.0256	1.0127	0.93271	0.92417	5.2468	12420000000	6789000000	5631300000	6286700000	3373900000	2912800000	6078500000	3381500000	2697000000	44750000	27728000	17022000	10303000	5854500	4448900
DYS1	1	14	14	35.4	387	387	0.98424	1.0071	0.93216	NA	6.5218	16115000000	8706800000	7407900000	6388400000	3393400000	2995000000	9706000000	5300000000	4406100000	20179000	13427000	6752300	0	0	0
CDC19	1	24	24	49.6	500	500	0.99452	0.98715	0.93179	0.99682	7.3665	619130000000	338430000000	280700000000	251850000000	132030000000	119820000000	359780000000	202180000000	157600000000	4620700000	2733600000	1887100000	2887700000	1494400000	1393300000
GDA1	1	7	7	18	518	518	0.95425	0.96044	0.93169	0.94703	9.4556	2422100000	1311100000	1111000000	1109000000	595240000	513810000	1275600000	693770000	581810000	26966000	16375000	10591000	10511000	5697100	4813900
HTS1	1	11	11	24.5	546	546	1.0926	0.97539	0.93163	NA	11.251	3386000000	1839700000	1546200000	1281600000	682900000	598710000	2089100000	1147400000	941750000	13824000	8787600	5036300	1393400	643930	749420
HOM6	1	11	11	32.9	359	359	1.0637	0.98447	0.93087	0.95821	23.687	16335000000	8543100000	7791600000	7565400000	3732900000	3832500000	8565900000	4691200000	3874600000	172270000	103970000	68297000	31071000	14991000	16080000
MAK21	1	11	11	14.3	1025	1025	0.9814	1.0197	0.93071	0.88835	6.8777	4184100000	2236400000	1947700000	1478900000	698120000	780750000	2693000000	1531600000	1161400000	3147700	1891500	1256200	9130800	4807000	4323800
NOP2	1	14	14	28.3	618	618	1.0098	1.0125	0.93036	0.95745	36.356	14647000000	7662200000	6985200000	7059300000	3570200000	3489100000	7563800000	4077400000	3486400000	15796000	9901500	5894400	8468700	4668200	3800500
PDR5	1	21	19	19.1	1511	1511	0.89226	1.0396	0.93012	1.0103	4.2272	11691000000	6162500000	5528100000	3017000000	1610700000	1406300000	8254300000	4327700000	3926600000	24676000	13503000	11173000	394520000	210540000	183980000
RVB1	1	10	10	30.7	463	463	0.99626	1.0214	0.92972	0.45727	3.9069	7070800000	3702100000	3368700000	3320200000	1655600000	1664600000	3735400000	2037900000	1697500000	12058000	6371200	5686700	3133100	2232600	900560
GSP1	1	7	1	27.4	219	219	1.0187	1.0078	0.92879	0.95364	4.3608	27240000000	14166000000	13074000000	12928000000	6646300000	6282100000	14251000000	7483800000	6766800000	43848000	27945000	15903000	16810000	7802400	9007200
RPL22A	1	5	4	76	121	121	1.1442	1.3377	0.92877	0.51185	24.605	3182700000	1605500000	1577200000	1855200000	938210000	916960000	1272600000	633810000	638820000	28866000	17559000	11307000	26054000	15907000	10147000
PRE5	1	6	6	42.3	234	234	1.0494	1.0115	0.92825	NA	6.433	2270100000	1194900000	1075200000	884690000	442370000	442320000	1375000000	746470000	628520000	10391000	6033000	4358100	0	0	0
SLM4	1	4	4	40.1	162	162	NA	NA	0.92819	NA	NA	670200000	505300000	164900000	298240000	223450000	74797000	313600000	244930000	68676000	49969000	30349000	19620000	8388500	6581700	1806800
VPS21	1	6	6	31.4	210	210	1.0475	1.0405	0.92797	0.92807	13.642	897520000	465770000	431740000	275940000	140980000	134950000	483750000	245720000	238030000	61783000	39180000	22603000	76049000	39893000	36156000
ALD6	1	20	20	50.8	500	500	1.0787	0.99607	0.92784	1.0116	8.4285	122940000000	64286000000	58653000000	54380000000	27092000000	27288000000	67086000000	36275000000	30811000000	1190700000	761870000	428850000	283460000	157540000	125920000
EGD1	1	9	9	59.9	157	157	1.0482	1.0294	0.92756	0.93025	9.5569	16380000000	8803200000	7577100000	5215300000	2708500000	2506800000	11055000000	6028700000	5026400000	50256000	32241000	18016000	59645000	33745000	25900000
RPS17B;RPS17A	2	6	6	64.7	136	136;136	0.96471	0.9861	0.92726	0.9946	3.0483	37307000000	19640000000	17667000000	17775000000	9322800000	8451700000	19266000000	10161000000	9104700000	113420000	70360000	43058000	153350000	85694000	67651000
RNA1	1	7	7	23.3	407	407	0.98009	0.95552	0.92702	NA	8.2822	5072500000	2711900000	2360500000	2824000000	1458600000	1365500000	2243400000	1250200000	993180000	5018300	3153000	1865300	0	0	0
CPR2	1	2	2	12.7	205	205	NA	NA	0.92629	NA	NA	3598500	2169400	1429100	0	0	0	0	0	0	3598500	2169400	1429100	0	0	0
ERG27	1	10	10	37.2	347	347	0.78879	1.0522	0.92559	1.0778	17.789	864100000	491640000	372460000	167180000	98741000	68440000	325450000	178270000	147180000	181340000	113610000	67725000	190140000	101020000	89120000
APT1	1	5	5	23.5	187	187	0.94617	1.0169	0.9249	NA	5.3945	4424000000	2411700000	2012300000	2123000000	1123900000	999040000	2289400000	1279900000	1009500000	11606000	7857000	3748800	0	0	0
	1	1	1	8	199	199	NA	NA	0.92488	NA	NA	6501900	3888300	2613600	0	0	0	0	0	0	3499200	2158200	1341000	3002700	1730100	1272600
SAH1	1	18	18	39.9	449	449	1.0082	0.97839	0.92487	1.0283	9.6062	69817000000	37954000000	31863000000	29554000000	15266000000	14289000000	39097000000	21974000000	17123000000	878750000	555740000	323000000	287180000	158560000	128620000
SPT16	1	7	7	9.1	1035	1035	0.93528	1.0084	0.92402	NA	9.8706	1299700000	696320000	603390000	470430000	257190000	213240000	822370000	434880000	387490000	6913800	4244600	2669200	0	0	0
YPR1	1	9	9	42.9	312	312	1.0932	0.99899	0.9239	NA	16.125	4333200000	2283600000	2049600000	1350200000	638470000	711770000	2936200000	1616100000	1320100000	42845000	26942000	15903000	3836700	2022800	1814000
CKB2	1	2	2	8.5	258	258	NA	NA	0.92372	0.96992	NA	19671000	11498000	8172200	0	0	0	0	0	0	11621000	7176100	4444700	8049800	4322300	3727500
TSA1	1	3	3	24	196	196	1.0297	1.0393	0.92359	1.0188	7.8263	46046000000	24671000000	21375000000	20119000000	10456000000	9662800000	25901000000	14198000000	11703000000	20450000	13223000	7227200	5426200	3562500	1863700
FBA1	1	22	22	71.6	359	359	0.98991	0.96795	0.92348	0.99902	21.497	156130000000	85325000000	70805000000	79579000000	42250000000	37330000000	74329000000	41695000000	32634000000	1852500000	1172900000	679570000	368330000	207150000	161180000
SPE3	1	8	8	25.6	293	293	0.93345	0.97953	0.92345	1.0251	12.345	8775700000	4853300000	3922500000	3026300000	1658700000	1367600000	5684700000	3154600000	2530100000	54674000	34289000	20385000	10003000	5619400	4383200
FUN12	1	17	17	17.6	1002	1002	0.98869	0.97445	0.92327	1.0812	30.047	14357000000	7845800000	6511200000	6534700000	3497100000	3037600000	7759000000	4295200000	3463800000	11576000	7505700	4070000	51682000	45915000	5767500
CBF5	1	11	11	25.1	483	483	0.94856	0.94549	0.92284	1.0145	6.7996	13267000000	7229800000	6037200000	6549000000	3517000000	3032000000	6689000000	3695000000	2994000000	20905000	13398000	7506700	8138500	4403000	3735500
HSP82	1	35	7	47.2	709	709	1.1258	1.2227	0.92261	1.5178	3.2298	9400700000	4753800000	4647000000	4576500000	2302400000	2274100000	4779400000	2423800000	2355600000	41465000	26018000	15447000	3314900	1542600	1772300
ZUO1	1	18	18	46.4	433	433	0.97735	1.0214	0.92211	1.0154	5.2876	33535000000	17938000000	15597000000	18847000000	10037000000	8810300000	14048000000	7527000000	6520800000	392950000	240070000	152880000	246550000	133420000	113140000
	1	18	18	24.8	767	767	0.99405	1.0117	0.92196	1.1392	35.365	7783700000	4171500000	3612200000	2307700000	1207800000	1099900000	5420700000	2929700000	2491000000	43416000	27629000	15787000	11930000	6351700	5578800
ERG7	1	10	10	16.4	731	731	0.97449	0.99867	0.92188	1.0513	12.329	1749700000	941960000	807750000	641530000	335040000	306490000	774330000	414660000	359680000	135810000	85352000	50454000	198030000	106910000	91128000
COF1	1	4	4	41.3	143	143	1.047	1.0274	0.92156	0.91161	1.5802	23129000000	12507000000	10623000000	10422000000	5556900000	4865000000	12668000000	6925400000	5742600000	37993000	23621000	14371000	1530000	934190	595840
	1	10	10	39.7	297	297	1.0259	0.98151	0.92146	NA	15.959	6400600000	3434700000	2965900000	3352500000	1758800000	1593600000	3020100000	1657800000	1362200000	26091000	16847000	9243900	2031100	1249900	781200
SSB2	1	22	1	59.9	613	613	0.9948	0.98826	0.92113	1.0034	4.8722	359080000000	193850000000	165230000000	151950000000	79993000000	71959000000	200150000000	109590000000	90565000000	5157400000	3269000000	1888400000	1815300000	999720000	815590000
YPT6	1	8	8	33.5	215	215	1.1071	1.0355	0.92109	0.90064	17.327	1855000000	1066400000	788580000	904460000	521820000	382650000	907360000	518480000	388890000	19233000	11819000	7414300	23906000	14272000	9634700
RPS26A	1	3	1	26.1	119	119	NA	NA	0.92101	1.0085	NA	127410000	76703000	50710000	0	0	0	0	0	0	81065000	51127000	29938000	46348000	25576000	20772000
GAS1	1	11	11	26.3	559	559	0.94316	0.97503	0.92037	1.0025	7.5041	22022000000	12052000000	9970100000	7371300000	3948400000	3422800000	14010000000	7720100000	6290300000	374670000	231480000	143180000	265950000	152210000	113740000
ADH1	1	19	14	46	348	348	1.0373	0.99014	0.91991	1.0527	2.8617	440040000000	241720000000	198320000000	145750000000	76562000000	69183000000	289390000000	162190000000	127200000000	3232500000	2051800000	1180700000	1665700000	912370000	753360000
YPT52	1	6	6	34.2	234	234	1.0976	0.94504	0.91778	0.98623	4.1824	1014300000	548230000	466060000	477240000	249370000	227860000	462750000	255320000	207430000	32319000	19971000	12348000	41986000	23566000	18419000
TRR1	1	9	9	46.7	319	319	1.0289	1.0506	0.91758	0.99242	7.399	8640800000	4607200000	4033600000	3211800000	1652600000	1559300000	5313700000	2883400000	2430300000	96449000	60786000	35664000	18790000	10414000	8375900
UTR2	1	3	3	10.5	467	467	0.93192	1.0277	0.91724	1.0102	4.9613	2726100000	1544700000	1181300000	320430000	170940000	149500000	2346300000	1341400000	1004900000	12792000	7739000	5052800	46547000	24715000	21832000
SBP1	1	8	8	41.5	294	294	0.99133	0.96823	0.91714	0.84417	6.93	13285000000	7077300000	6207300000	6272600000	3215700000	3056800000	6985400000	3844900000	3140500000	14337000	7668200	6668600	12337000	9073900	3262800
	1	9	9	35.5	349	349	1.1236	0.99598	0.91699	NA	10.701	2732400000	1447500000	1284900000	1245700000	612390000	633260000	1440400000	807280000	633090000	46364000	27851000	18513000	0	0	0
RPL40B;RPL40A;UBI4	3	8	3	58.6	128	128;128;381	1.0016	0.99157	0.91635	0.95506	4.0464	70683000000	39113000000	31571000000	27395000000	14779000000	12616000000	42381000000	23798000000	18582000000	267270000	170660000	96604000	640540000	364940000	275600000
GDI1	1	7	7	23.5	451	451	NA	NA	0.91598	0.97792	NA	421010000	233090000	187920000	162300000	87305000	74997000	182150000	97975000	84171000	67653000	42833000	24819000	8911500	4977500	3934000
NPP1	1	2	2	3.9	742	742	NA	1.0022	0.91514	NA	NA	160680000	82573000	78105000	49258000	23048000	26211000	92123000	48230000	43893000	10266000	6297000	3968700	9030700	4999000	4031700
SSA2	1	35	12	67	639	639	1.0387	1.1091	0.9142	1.1822	14.78	337250000000	170370000000	166880000000	148680000000	74901000000	73780000000	183780000000	92571000000	91208000000	3608400000	2290500000	1317900000	1182600000	609570000	573020000
RPS25B	1	6	1	66.7	108	108	0.99479	0.98543	0.91402	0.96139	3.7024	41589000000	23064000000	18525000000	20323000000	11180000000	9142800000	20948000000	11694000000	9253300000	148080000	91674000	56404000	169980000	97601000	72378000
RPS7B	1	15	7	68.9	190	190	0.96017	1.0121	0.91388	1.0273	3.0666	20986000000	11328000000	9657800000	8424300000	4393200000	4031200000	12482000000	6887600000	5594000000	50117000	31635000	18481000	30195000	16046000	14148000
PRT1	1	12	12	21.8	763	763	1.0188	0.97148	0.9135	1.0601	9.0115	7343100000	4003200000	3339900000	2643300000	1387600000	1255700000	4637800000	2578400000	2059500000	45621000	28683000	16938000	16376000	8549200	7826400
SAM2	1	17	10	63.8	384	384	1.0589	0.96373	0.91181	1.0831	12.824	14633000000	7918400000	6714600000	6900500000	3589000000	3311400000	7365900000	4094700000	3271200000	306140000	200240000	105890000	60591000	34483000	26109000
VIP1	1	14	14	17.3	1146	1146	0.96079	1.0178	0.91161	NA	24.45	1581200000	877780000	703420000	668630000	378020000	290610000	907310000	496510000	410800000	2939800	1815900	1123900	2314600	1429100	885490
SER2	1	4	4	16.5	309	309	0.94085	0.96754	0.91145	NA	2.4001	1062200000	579610000	482620000	538590000	278440000	260150000	519440000	298600000	220840000	4191800	2566800	1625000	0	0	0
SSE1	1	28	26	40	693	693	1.0496	1.0882	0.9101	1.1474	8.25	70933000000	37676000000	33257000000	35221000000	18546000000	16675000000	34954000000	18656000000	16299000000	639610000	414070000	225540000	118050000	60287000	57761000
	1	10	10	43.2	241	241	1.0185	0.98579	0.91003	NA	4.9792	8553000000	4570400000	3982700000	3836500000	2012300000	1824100000	4677100000	2534600000	2142400000	36709000	22422000	14287000	2807200	985010	1822200
NHP2	1	3	3	28.2	156	156	0.9918	1.01	0.90923	0.80954	4.5084	3289100000	1809300000	1479700000	1960300000	1033500000	926760000	1300200000	757850000	542300000	19965000	12755000	7210000	8662100	5199500	3462600
TIF11	1	5	5	39.2	153	153	0.97291	0.96443	0.90914	1.1175	2.9008	11782000000	6331700000	5450300000	4433500000	2323500000	2110000000	7298900000	3976500000	3322400000	41724000	27295000	14429000	7864400	4359600	3504700
GUK1	1	7	7	46.5	187	187	1.0058	1.0121	0.90884	1.067	4.7746	19197000000	10344000000	8853200000	7733600000	4009200000	3724300000	11358000000	6268000000	5089700000	92093000	59405000	32689000	14036000	7542800	6493100
PRO3	1	10	10	50.7	286	286	0.9977	0.91769	0.90817	1.0682	10.227	8989300000	4511200000	4478200000	4607500000	2277700000	2329800000	4343000000	2211000000	2132000000	31291000	19314000	11977000	7514800	3115700	4399000
EGD2	1	6	6	61.5	174	174	1.0085	0.96497	0.90665	NA	7.916	43839000000	24004000000	19834000000	19994000000	10601000000	9393100000	23828000000	13393000000	10435000000	10349000	6579100	3770000	6292800	3573800	2719000
FAA4	1	14	12	26.9	694	694	1.0067	0.93827	0.90665	0.97373	13.207	3825700000	2127500000	1698300000	1600400000	857960000	742390000	1866800000	1051800000	814930000	151970000	99752000	52215000	206660000	117940000	88719000
SEC26	1	11	11	18.3	973	973	0.9772	1.0176	0.9051	0.95005	12.739	5283200000	2832200000	2450900000	2228200000	1168900000	1059300000	3042100000	1655300000	1386800000	10934000	6904900	4028700	1938300	1128600	809720
GPD2	1	5	4	16.1	440	440	1.0874	1.0092	0.90449	0.86597	4.8059	723040000	405370000	317670000	400160000	214680000	185470000	278110000	163470000	114640000	18747000	12000000	6747300	26018000	15210000	10808000
TMA19	1	7	7	28.1	167	167	0.99126	0.9865	0.90423	0.86394	6.3338	48670000000	26979000000	21691000000	16947000000	9075600000	7871600000	31685000000	17880000000	13805000000	32221000	20324000	11897000	5791200	3517600	2273700
RPS12	1	7	7	73.4	143	143	0.90916	0.98199	0.90413	NA	7.3778	12108000000	6640200000	5467300000	4003900000	2087700000	1916200000	8048800000	4519400000	3529400000	46701000	28790000	17911000	8155500	4318100	3837400
ERG20	1	12	12	34.1	352	352	1.0348	0.97537	0.90398	0.94359	9.0521	19734000000	10689000000	9044900000	7334100000	3791300000	3542800000	12318000000	6846700000	5471300000	76878000	48360000	28518000	4685000	2425900	2259000
HEM13	1	2	2	7.6	328	328	NA	NA	0.90382	0.84179	NA	46164000	26437000	19728000	36877000	20798000	16079000	0	0	0	6709100	4155500	2553600	2578600	1483200	1095400
SAM1	1	16	9	50.8	382	382	0.95099	1.0069	0.90355	0.99015	5.2766	32142000000	17628000000	14514000000	10367000000	5511600000	4855500000	21683000000	12061000000	9622400000	72927000	46062000	26865000	18607000	9870000	8737100
PUF6	1	2	2	3.5	656	656	NA	NA	0.9034	NA	NA	5213000	2635700	2577300	0	0	0	0	0	0	5213000	2635700	2577300	0	0	0
ARO2	1	15	15	58	376	376	0.98702	0.99432	0.90319	0.96375	6.0437	15523000000	8312100000	7211000000	7513800000	3976500000	3537300000	7734700000	4172800000	3561900000	129250000	80694000	48554000	145380000	82142000	63238000
DBP9	1	4	4	7.2	594	594	NA	1.1874	0.90087	1.1361	NA	534070000	291830000	242230000	181900000	103410000	78489000	346410000	185140000	161260000	2961400	1787100	1174300	2795900	1491900	1304000
EFT1	1	31	31	40.3	842	842	0.98586	1.0021	0.90067	0.98419	3.8712	118720000000	65302000000	53422000000	58522000000	31660000000	26862000000	57558000000	32032000000	25526000000	1612100000	1037000000	575030000	1032300000	572800000	459520000
TRP2	1	12	12	28.6	507	507	1.0647	0.98047	0.90043	NA	14.156	10347000000	6199300000	4147300000	6213100000	3987200000	2225800000	4116100000	2201200000	1914900000	17471000	10908000	6563100	0	0	0
TUP1	1	9	9	17.8	713	713	0.98876	1.0122	0.89993	NA	8.4676	9117500000	4904900000	4212600000	4670800000	2461600000	2209300000	4441000000	2439900000	2001200000	5705300	3500700	2204600	0	0	0
PFY1	1	4	4	39.7	126	126	1.0916	0.99186	0.8997	NA	31.897	873680000	478710000	394980000	407250000	212290000	194960000	461410000	263130000	198280000	5026900	3290100	1736800	0	0	0
DED1	1	10	10	29	604	604	1.0029	1.0288	0.89907	0.97643	13.157	6787600000	3591400000	3196100000	3725800000	1928000000	1797800000	2964200000	1605600000	1358600000	60977000	37870000	23107000	36576000	19995000	16581000
SSO2	1	4	3	16.9	295	295	1.0932	0.99426	0.89894	1.1195	0.62449	6099100000	3214100000	2885100000	3097800000	1573800000	1524000000	2867900000	1564100000	1303800000	42662000	27070000	15592000	90719000	49074000	41644000
HMT1	1	6	6	23	348	348	0.99889	0.95135	0.89867	NA	5.3465	865730000	480920000	384810000	246020000	119490000	126530000	608900000	354790000	254120000	10807000	6649600	4157100	0	0	0
BMH1	1	8	4	46.1	267	267	1.0374	1.0007	0.89848	1.1078	4.3909	84819000000	45357000000	39462000000	35543000000	18474000000	17069000000	49168000000	26793000000	22374000000	101830000	86053000	15773000	5995400	3245200	2750200
SFA1	1	7	7	24.1	386	386	1.0577	1.0575	0.89692	NA	4.38	4507000000	2388700000	2118300000	1908100000	1004100000	903990000	2587600000	1377500000	1210100000	11249000	7056400	4193000	0	0	0
PGK1	1	32	32	73.6	416	416	1.043	1.0491	0.89651	0.99077	7.4396	569590000000	305190000000	264400000000	226680000000	116850000000	109830000000	332500000000	181840000000	150660000000	7234000000	4717500000	2516500000	3173100000	1788400000	1384600000
UGA1	1	4	4	12.5	471	471	1.2626	1.0053	0.89636	NA	5.8156	1491000000	757540000	733480000	755480000	354230000	401250000	727810000	397920000	329880000	7734000	5387700	2346300	0	0	0
VAS1	1	30	30	32.3	1104	1104	0.97711	1.01	0.89562	0.99514	5.1405	44164000000	24003000000	20162000000	17729000000	9465100000	8264100000	26270000000	14440000000	11831000000	121470000	74830000	46643000	43189000	23004000	20186000
ALA1	1	29	29	28.4	983	983	1.0112	0.9731	0.8954	0.99572	9.5986	26045000000	14101000000	11944000000	10691000000	5606600000	5084200000	15253000000	8436700000	6816200000	90966000	53195000	37770000	9989400	4659600	5329800
SAC6	1	17	17	41.6	642	642	1.0239	1.0043	0.89473	NA	12.445	9473500000	4727800000	4745700000	5346200000	2461100000	2885100000	4078700000	2234700000	1844100000	48573000	32000000	16573000	0	0	0
	1	8	8	19	501	501	1.1694	1.0674	0.89461	0.91864	50.35	649690000	316430000	333260000	120360000	48443000	71920000	405270000	206590000	198680000	82244000	38197000	44047000	41820000	23203000	18617000
GVP36	1	9	9	48.2	326	326	1.0202	1.0004	0.89386	NA	14.186	4228100000	2243700000	1984400000	1822000000	946590000	875440000	2397700000	1292400000	1105300000	8424800	4755800	3669000	0	0	0
NOP13	1	18	18	52.6	403	403	0.95003	1.0191	0.8924	1.0487	8.1782	9345800000	5272000000	4073900000	4673800000	2616800000	2057000000	4660900000	2648700000	2012200000	6426500	3989900	2436600	4736000	2546700	2189400
URA4	1	6	6	28.3	364	364	1.0172	0.90076	0.89182	NA	3.0547	1517500000	834000000	683540000	739270000	390270000	349000000	770020000	438440000	331570000	8249600	5281100	2968500	0	0	0
PDC1	1	25	22	52.8	563	563	1.0008	0.99049	0.89127	1.0076	7.4799	296770000000	166230000000	130540000000	113450000000	62292000000	51160000000	172220000000	96890000000	75330000000	8698200000	5714700000	2983500000	2398700000	1336200000	1062500000
GPP1	1	17	11	62.8	250	250	1.0338	0.97618	0.8905	0.86836	4.6121	138470000000	76719000000	61746000000	63170000000	33660000000	29510000000	75113000000	42944000000	32169000000	168230000	107230000	61001000	14221000	7872500	6348800
NIF3	1	9	9	39.6	288	288	1.069	0.92729	0.88983	0.94046	10.343	1668700000	889960000	778700000	436040000	212340000	223700000	1154100000	630350000	523800000	62570000	38722000	23848000	15903000	8545800	7357100
HRI1	1	10	10	37.7	244	244	1.0002	1.0189	0.88944	NA	9.8803	6747600000	3629300000	3118400000	2750500000	1443400000	1307200000	3961100000	2163000000	1798100000	36020000	22887000	13134000	0	0	0
PIL1	1	8	8	46.6	339	339	0.99414	0.95276	0.88914	1.0033	4.7524	2087200000	1139500000	947720000	1014300000	523730000	490540000	672850000	358210000	314640000	292870000	195560000	97301000	107250000	62002000	45247000
ASN2	1	13	11	33.4	572	572	1.0111	0.98874	0.88825	0.86308	1.5131	6927000000	3665200000	3261800000	2687500000	1388100000	1299400000	4159600000	2226400000	1933300000	71791000	46133000	25657000	8077600	4557100	3520600
CYS4	1	25	25	56.4	507	507	1.0614	1.0269	0.8882	1.1632	9.2805	9451800000	5114300000	4337500000	3719100000	1946400000	1772800000	5496000000	3020300000	2475700000	205590000	130230000	75362000	31066000	17354000	13712000
SRP1	1	3	3	6.5	542	542	0.96569	0.98833	0.88782	NA	1.8434	2766300000	1557400000	1208900000	1388200000	733670000	654540000	1364200000	814030000	550140000	13909000	9697600	4211600	0	0	0
HSC82	1	41	13	51.9	705	705	1.0485	1.0905	0.88781	1.1879	12.353	206500000000	109300000000	97204000000	97071000000	50855000000	46216000000	107780000000	57420000000	50361000000	1448500000	916330000	532160000	199510000	104690000	94823000
ARB1	1	11	11	22.3	610	610	0.99286	0.98376	0.88764	1.0022	7.0477	24913000000	13497000000	11416000000	11553000000	6139600000	5413900000	13247000000	7293800000	5953600000	49023000	29790000	19234000	62810000	33611000	29199000
THS1	1	20	20	35.6	734	734	0.96732	0.98486	0.8874	1.0695	7.8217	12464000000	6745200000	5718800000	5497600000	2955400000	2542200000	6802500000	3686800000	3115800000	138320000	88487000	49835000	25538000	14548000	10990000
NUC1	1	3	3	15.5	329	329	NA	NA	0.88506	NA	NA	62385000	34144000	28241000	52966000	28664000	24302000	0	0	0	7535400	4386100	3149300	1884100	1094600	789440
RTN1	1	13	13	51.2	295	295	0.94796	0.96869	0.88503	1.0214	4.144	44572000000	24431000000	20141000000	22158000000	11839000000	10319000000	22251000000	12495000000	9755300000	73522000	45836000	27686000	90378000	51386000	38991000
MET6	1	34	34	55.5	767	767	1.0238	0.72461	0.88468	0.72845	9.167	59624000000	34990000000	24633000000	22595000000	11748000000	10846000000	36294000000	22775000000	13519000000	543910000	345920000	197990000	191290000	120970000	70313000
CDC60	1	24	22	27.6	1090	1090	0.98693	0.90475	0.88465	0.89228	5.472	36666000000	20418000000	16248000000	12787000000	6741500000	6045800000	23818000000	13644000000	10174000000	50125000	26295000	23830000	10983000	6655800	4327300
SER3	1	9	6	28.1	469	469	1.1875	0.74929	0.88413	NA	13.852	6796700000	4089800000	2706900000	1170200000	587070000	583090000	5623400000	3500700000	2122700000	3085100	1949500	1135600	0	0	0
UBP6	1	8	8	20.8	499	499	1.0422	1.0334	0.88366	NA	6.0349	3770500000	1979500000	1791100000	1418700000	722420000	696240000	2349100000	1255500000	1093600000	2777600	1537000	1240500	0	0	0
ARC1	1	17	17	45.7	376	376	1.066	1.0213	0.88292	1.0604	5.3381	7369800000	3958000000	3411800000	3173400000	1633200000	1540100000	4053600000	2235900000	1817700000	126670000	81214000	45460000	16167000	7623400	8543300
MES1	1	18	18	30.5	751	751	1.0242	1.0047	0.8827	1.0178	29.988	13227000000	6952300000	6274700000	5863800000	3120900000	2742900000	7291600000	3789500000	3502100000	65887000	38792000	27094000	5676800	3092800	2584100
SSB1	1	22	1	59.9	613	613	NA	NA	0.8825	NA	NA	147550000	83842000	63706000	56352000	29722000	26629000	21013000	9491200	11522000	70183000	44628000	25554000	0	0	0
HYP2	1	9	7	60.5	157	157	0.97022	1.0116	0.88139	0.9604	12.697	141130000000	77205000000	63929000000	66344000000	35462000000	30883000000	74639000000	41651000000	32988000000	86594000	56159000	30435000	64063000	36208000	27855000
ATG8	1	4	4	29.9	117	117	NA	NA	0.88109	0.87471	NA	32234000	18822000	13412000	0	0	0	0	0	0	13928000	8669800	5258300	18306000	10152000	8153300
SEC31	1	19	19	20.1	1273	1273	0.98466	1.0505	0.87952	NA	9.1679	14135000000	7507800000	6627500000	5514200000	2880700000	2633500000	8618300000	4625200000	3993100000	2801500	1938100	863330	0	0	0
RPP1B	1	3	3	74.5	106	106	1.0309	0.9279	0.87927	0.68409	19.369	19149000000	10233000000	8916800000	7591400000	3909100000	3682300000	11548000000	6316700000	5230900000	7743100	4939800	2803300	2683400	1794600	888770
ARO8	1	10	10	31.8	500	500	1.001	0.95278	0.87915	1.0729	3.7743	4032700000	2169800000	1862900000	1680000000	862010000	817970000	2166300000	1189400000	976880000	160790000	104200000	56582000	25633000	14184000	11449000
FPR4	1	5	4	20.7	392	392	1.0075	0.75605	0.87866	NA	15.068	8419200000	4417000000	4002300000	1245900000	695730000	550180000	7155700000	3710100000	3445600000	14635000	9473500	5161300	2971900	1658400	1313400
SSO1	1	6	5	26.2	290	290	0.95488	0.98877	0.8785	1.0375	12.329	3411900000	1844500000	1567400000	1337400000	713370000	624020000	1752800000	951850000	800920000	136800000	84728000	52075000	184960000	94595000	90363000
OLA1	1	11	11	25.6	394	394	1.0041	1.0143	0.87835	1.0443	7.5895	7425500000	4008800000	3416700000	3558900000	1900400000	1658500000	3741500000	2034400000	1707200000	82211000	52003000	30208000	42891000	22104000	20787000
AHA1	1	8	8	24.9	350	350	1.0301	1.1128	0.87817	1.103	18.216	5285500000	2738700000	2546900000	3320700000	1749600000	1571100000	1934500000	971780000	962710000	15610000	9757100	5852900	14681000	7495800	7184900
PYC2	1	10	4	11.7	1180	1180	1.0234	1.012	0.87705	NA	3.8637	2478200000	1300500000	1177700000	1385600000	710950000	674610000	1080400000	581840000	498530000	10080000	6450300	3629700	2157400	1212000	945430
RPL38	1	7	7	79.5	78	78	0.94849	1.0078	0.87573	0.93748	11.362	3523700000	1902300000	1621400000	1798900000	941670000	857190000	1546000000	856900000	689140000	59505000	36771000	22734000	119340000	66973000	52368000
RHO3	1	6	6	48.9	231	231	0.9953	1.0215	0.87554	0.91912	20.722	1322000000	722650000	599390000	551210000	302390000	248820000	731120000	394850000	336270000	22935000	15646000	7289100	16773000	9766800	7006000
TIF5	1	14	14	34.8	405	405	1	1.0061	0.87534	1.2916	13.581	25655000000	14140000000	11515000000	11565000000	6470300000	5094600000	14070000000	7658000000	6412100000	11752000	7719400	4032900	8321600	4074700	4246900
RRB1	1	9	9	30.3	511	511	0.97546	1.0254	0.87516	NA	7.565	4663800000	2556700000	2107100000	2246300000	1226200000	1020100000	2405100000	1323100000	1082000000	7381100	4559600	2821500	5018900	2856800	2162100
MVD1	1	11	11	36.6	396	396	1.024	1.0165	0.87515	1.0035	5.5029	1912500000	1017800000	894750000	843150000	413350000	429800000	960060000	517170000	442890000	104040000	84412000	19633000	5288500	2857700	2430800
ARO4	1	8	8	47.6	370	370	0.9435	1.0166	0.87476	0.82487	9.587	22016000000	12256000000	9760200000	10551000000	5792900000	4757900000	11430000000	6440500000	4989900000	24276000	15960000	8315700	10393000	6319200	4073600
SES1	1	16	16	39.4	462	462	0.98608	0.98914	0.87464	1.1302	15.14	25620000000	13405000000	12216000000	10689000000	5770100000	4919100000	14723000000	7498800000	7224600000	180480000	121670000	58813000	27288000	14303000	12986000
TKL1	1	17	17	31.5	680	680	0.97471	0.98713	0.87405	0.99804	3.2572	12518000000	6913200000	5604600000	4761300000	2553200000	2208100000	6021400000	3314700000	2706700000	925090000	596360000	328730000	810020000	448940000	361070000
CCT8	1	15	15	32.7	568	568	1.0066	1.0034	0.87388	0.945	4.7204	7939300000	4225700000	3713600000	3326800000	1725200000	1601600000	4594500000	2489500000	2105100000	11931000	7647100	4283500	5986600	3365600	2621000
STM1	1	16	16	59	273	273	0.98862	0.96058	0.87386	1.0863	4.3488	111220000000	61207000000	50011000000	42623000000	22995000000	19628000000	68241000000	38000000000	30240000000	172570000	111760000	60804000	181860000	99490000	82365000
RPN1	1	17	17	18.7	993	993	1.053	1.0132	0.87359	NA	14.022	13588000000	7117900000	6470400000	6307500000	3180600000	3126900000	7265100000	3927500000	3337600000	15098000	9512700	5585400	647040	313350	333690
SSA4;SSA3	2	12	6	23.4	642	642;649	9.611	1.534	0.87274	1.0562	258.56	3154800000	400580000	2754200000	426540000	31812000	394730000	2632600000	313720000	2318900000	47888000	29028000	18860000	47762000	26022000	21740000
PFK2	1	14	14	20.2	959	959	1.0101	0.96781	0.87197	0.85805	6.0508	22963000000	12420000000	10543000000	8683000000	4642700000	4040300000	14146000000	7692600000	6453300000	103960000	67750000	36213000	29888000	17030000	12858000
	1	9	9	35.3	312	312	1.2281	1.0311	0.87173	NA	14.369	5359200000	2824900000	2534300000	2213600000	1051600000	1162000000	3138500000	1769100000	1369400000	7096500	4140800	2955700	0	0	0
SVF1	1	6	6	17.7	481	481	0.89689	1.0059	0.87134	1.1541	4.4225	2105400000	1116600000	988830000	1071000000	560820000	510180000	1009600000	540940000	468620000	18957000	11743000	7213500	5886700	3073900	2812800
KRS1	1	17	17	35.9	591	591	0.94336	0.99489	0.87124	0.98858	11.313	20978000000	11391000000	9586700000	10082000000	5409100000	4672600000	10539000000	5756700000	4782600000	295370000	191210000	104160000	61286000	33929000	27358000
HXK2	1	17	14	55.3	486	486	0.98158	0.96379	0.87098	0.94779	10.696	41008000000	22007000000	19001000000	13090000000	6810000000	6279800000	26787000000	14508000000	12279000000	1002300000	614470000	387830000	129290000	74680000	54607000
SUI2	1	11	11	38.5	304	304	1.0405	0.94198	0.87042	1.0373	10.367	4699100000	2519000000	2180100000	2188400000	1136300000	1052100000	2497500000	1374400000	1123100000	11885000	7603100	4282200	1325700	662970	662770
CYS3	1	6	6	21.6	394	394	0.99199	0.99542	0.86992	1.0559	8.4013	11041000000	5852600000	5188500000	5423300000	2826100000	2597200000	5377500000	2874300000	2503100000	199580000	130310000	69268000	40767000	21870000	18897000
URA1	1	7	7	23.9	314	314	1.0263	0.94318	0.86969	1.2859	8.2868	3709200000	1635200000	2074000000	2023200000	855980000	1167200000	1636500000	753340000	883210000	42765000	23512000	19253000	6747200	2356900	4390200
ZWF1	1	9	9	24.6	505	505	1.058	0.88258	0.86874	1.0761	7.3401	5651100000	3283500000	2367600000	1719200000	882960000	836260000	3881400000	2368800000	1512600000	44564000	28424000	16139000	5857600	3305700	2551900
MET22	1	6	6	25.8	357	357	1.0197	1.0832	0.86847	NA	18.57	1886100000	943900000	942240000	937200000	443650000	493540000	946700000	498780000	447920000	2238600	1464700	773980	0	0	0
DAK1	1	11	11	29.6	584	584	1.1211	1.0361	0.86798	0.95309	15.37	8713300000	4250000000	4463300000	1936100000	1019500000	916510000	6733500000	3204100000	3529400000	40471000	24473000	15997000	3272100	1894700	1377400
ENA1	1	16	2	19.2	1091	1091	0.81297	0.89397	0.86724	0.93692	19.777	1740400000	1014600000	725820000	578350000	339310000	239040000	873950000	499720000	374230000	155280000	101020000	54263000	132800000	74517000	58287000
ADE13	1	9	9	26.1	482	482	1.0341	0.94832	0.86688	NA	11.834	5811700000	3030200000	2781500000	3434600000	1705600000	1729000000	2366900000	1317200000	1049600000	10176000	7333700	2842700	0	0	0
GRS1	1	24	24	35.8	690	690	0.99402	1.0122	0.8666	1.1063	7.715	35968000000	19512000000	16457000000	14293000000	7632900000	6660300000	21490000000	11763000000	9727600000	168230000	107580000	60643000	16815000	8746400	8068800
YCK1	1	7	5	18.8	538	538	0.87843	1.1546	0.86637	0.97895	16.549	1158400000	644680000	513680000	560510000	308040000	252470000	528640000	295800000	232840000	28743000	18715000	10028000	40455000	22120000	18334000
SRP72	1	8	8	10.8	640	640	0.92426	0.912	0.86541	NA	10.3	885100000	481660000	403440000	373100000	194120000	178980000	501930000	281160000	220770000	10065000	6382900	3682200	0	0	0
UGP1	1	12	12	28.7	499	499	1.0306	1.0025	0.86494	0.91644	7.7518	7849900000	4117800000	3732000000	4385800000	2270200000	2115600000	3276500000	1740900000	1535600000	121470000	72412000	49053000	66024000	34261000	31763000
MRT4	1	8	8	39	236	236	0.90102	0.96062	0.86347	1.0658	6.9216	2844200000	1606400000	1237800000	1303000000	709970000	593010000	1508600000	877340000	631280000	17940000	11160000	6780000	14629000	7916300	6713000
PRS3	1	4	4	19.1	320	320	0.97598	0.97652	0.86315	NA	14.19	1733600000	933450000	800150000	704120000	371140000	332980000	1023500000	558430000	465100000	5950500	3886200	2064300	0	0	0
TAL1	1	16	16	45.4	335	335	1.0075	1.0223	0.86269	1.0577	9.8572	27616000000	14864000000	12753000000	13018000000	6914200000	6103600000	14274000000	7753000000	6520900000	194400000	124230000	70164000	130290000	72358000	57930000
ATG19	1	3	3	13.5	415	415	NA	NA	0.86127	NA	NA	152060000	81997000	70063000	73352000	37270000	36082000	74407000	41766000	32641000	4300200	2960200	1340000	0	0	0
FRS2	1	18	18	41.9	503	503	0.99638	0.93552	0.86067	1.402	6.9573	23972000000	13039000000	10933000000	12080000000	6385900000	5693700000	11759000000	6587300000	5171700000	126300000	62494000	63803000	6770100	3378300	3391800
RDI1	1	6	6	42.6	202	202	1.0921	1.0105	0.86047	0.89946	2.8338	3456600000	1796700000	1659900000	1589200000	808550000	780700000	1776600000	931950000	844650000	48854000	31556000	17298000	41880000	24600000	17280000
THR4	1	20	20	39.9	514	514	1.0287	1.0132	0.85991	0.96766	3.2633	37917000000	20464000000	17453000000	16316000000	8656900000	7659100000	21303000000	11624000000	9679700000	274390000	170910000	103480000	23376000	12770000	10607000
MET17	1	12	12	33.6	444	444	1.0589	1.1194	0.85956	1.1023	5.6811	26151000000	13494000000	12657000000	13018000000	6550600000	6467700000	12631000000	6626500000	6004200000	428400000	278740000	149660000	73930000	38155000	35776000
CCT3	1	12	12	31.1	534	534	1.0085	0.9987	0.85949	NA	7.2089	5256700000	2934400000	2322300000	2640900000	1413500000	1227300000	2596200000	1508800000	1087400000	18631000	11605000	7025800	986860	425840	561020
TIF1	1	8	8	30.9	395	395	1.0015	0.95009	0.85889	0.8721	7.371	20981000000	11787000000	9193700000	10592000000	5841000000	4750800000	10280000000	5878500000	4401800000	103270000	64312000	38954000	5148500	2939900	2208600
YEH1	1	2	2	6.5	573	573	NA	NA	0.85874	NA	NA	206170000	101520000	104640000	63902000	28903000	34999000	135580000	68538000	67039000	3550300	2281000	1269300	3137900	1801400	1336500
RAS2	1	7	7	39.8	322	322	0.99544	1.003	0.85858	0.99963	5.0954	7226900000	3891700000	3335200000	3518900000	1840700000	1678200000	3406600000	1869600000	1537000000	136550000	87908000	48645000	164930000	93571000	71360000
GPA2	1	3	3	9.6	449	449	NA	NA	0.85851	NA	NA	108310000	58413000	49895000	50705000	25405000	25300000	52211000	29432000	22779000	5392200	3576800	1815500	0	0	0
EFM1	1	5	5	10.9	585	585	NA	NA	0.85769	NA	NA	62001000	15474000	46527000	59926000	14187000	45739000	0	0	0	2074200	1286200	787950	0	0	0
LSP1	1	8	8	32	341	341	1.1301	1.0742	0.85685	1.0475	10.518	2910800000	1558000000	1352800000	1133400000	562190000	571230000	1605500000	889690000	715830000	133840000	84785000	49053000	38021000	21319000	16703000
YCK2	1	9	7	23.4	546	546	0.97046	0.97181	0.85631	0.99275	4.9716	1047200000	561510000	485650000	473030000	253000000	220030000	461190000	240890000	220300000	36578000	25072000	11506000	76363000	42548000	33815000
SCW4	1	3	3	8	386	386	0.91959	0.81406	0.85617	0.51082	21.197	2010000000	1152300000	857660000	870390000	470970000	399430000	1086500000	646140000	440310000	31084000	19967000	11116000	22060000	15253000	6806900
PMI40	1	9	9	27.3	429	429	0.99316	1.0708	0.85599	NA	10.822	2104900000	1145600000	959230000	1130500000	609360000	521170000	946920000	519250000	427670000	27399000	17011000	10388000	0	0	0
ARX1	1	14	14	27.3	593	593	0.89393	0.97728	0.85565	0.95108	15.747	4038600000	1989700000	2049000000	2018000000	907250000	1110700000	1978400000	1056800000	921650000	25064000	15863000	9201800	17155000	9766300	7388300
PST2	1	5	5	23.2	198	198	1.1087	1.0271	0.8556	1.0078	0.72851	3309900000	1459700000	1850300000	1519700000	666290000	853450000	1615800000	688190000	927570000	98074000	63417000	34657000	76365000	41772000	34593000
YHR020W	1	21	21	34.6	688	688	0.9301	0.99392	0.85557	1.1314	9.5268	25355000000	14004000000	11350000000	11144000000	6014200000	5130100000	14129000000	7939000000	6190200000	67641000	43652000	23989000	13375000	7450200	5924600
FRS1	1	17	17	30.3	595	595	0.98276	0.9761	0.85542	1.0518	11.862	5939800000	3182800000	2757000000	2450000000	1330300000	1119700000	3351200000	1765100000	1586100000	132810000	84379000	48431000	5881000	3048200	2832800
CAR2	1	7	7	27.1	424	424	1.0806	0.8792	0.85514	1.0214	9.0871	2239800000	1225200000	1014600000	911900000	478170000	433730000	1270900000	711470000	559460000	42051000	27111000	14940000	14923000	8494000	6429200
PRS1	1	5	5	20.4	427	427	NA	1.1805	0.85366	NA	NA	617690000	344780000	272910000	407830000	243550000	164290000	192780000	90332000	102450000	17083000	10902000	6180700	0	0	0
PRE8	1	7	7	32.8	250	250	1.0475	0.9938	0.85332	NA	6.5253	2927600000	1527500000	1400100000	1490700000	741630000	749110000	1417900000	774010000	643930000	16077000	10314000	5762500	2868000	1588300	1279700
ERG13	1	14	14	32	491	491	1.0029	1.0643	0.85321	1.0193	12.978	12503000000	6275100000	6227500000	6317100000	3002000000	3315200000	6010400000	3160900000	2849500000	160050000	103730000	56318000	14983000	8428200	6555000
PUB1	1	3	3	6.4	453	453	0.98428	1.0381	0.85235	1.0115	4.5566	4844600000	2629000000	2215600000	1961800000	1044000000	917880000	2857700000	1569300000	1288400000	19018000	12564000	6453700	6077000	3178200	2898800
GLN4	1	26	26	34.2	809	809	0.97507	0.98662	0.85221	1.0747	6.5873	15081000000	8153600000	6927500000	6200500000	3224700000	2975800000	8758300000	4852200000	3906100000	90621000	60564000	30057000	31599000	16079000	15520000
NCL1	1	17	17	28.7	684	684	1.0027	1.0049	0.8519	NA	11.274	4685500000	2417800000	2267600000	2147200000	1084000000	1063200000	2499700000	1308300000	1191400000	37351000	24851000	12500000	1213500	729920	483590
SAR1	1	2	2	11.1	190	190	NA	NA	0.85024	NA	NA	56454000	28104000	28350000	22954000	11614000	11340000	28651000	13347000	15304000	4849700	3143200	1706500	0	0	0
TYS1	1	15	15	38.1	394	394	0.99753	0.99116	0.84907	0.98202	5.524	9540000000	5094900000	4445100000	4230600000	2262800000	1967800000	5217700000	2775300000	2442400000	75992000	48111000	27880000	15718000	8711600	7006700
MRI1	1	7	7	28	411	411	0.97343	1.0313	0.84849	NA	6.1478	2337000000	1270800000	1066200000	909330000	477360000	431970000	1418000000	787340000	630620000	9715200	6133100	3582100	0	0	0
GLY1	1	8	8	24	387	387	0.98181	0.96869	0.84817	NA	19.466	5977600000	3155900000	2821700000	2835400000	1496200000	1339300000	3113100000	1641400000	1471700000	24755000	15962000	8792800	4275800	2355900	1919900
FRD1	1	7	7	23.2	470	470	0.9689	0.76967	0.84655	NA	47.056	922080000	487940000	434140000	456200000	226850000	229350000	449270000	250350000	198920000	14901000	9774200	5126700	1702700	961580	741120
PMA1;PMA2	2	21	21	24.9	918	918;947	0.92255	0.98133	0.8459	1.0388	6.8023	120780000000	67940000000	52836000000	53857000000	30085000000	23772000000	61361000000	34781000000	26580000000	349420000	228620000	120800000	5209800000	2846100000	2363700000
ASP1	1	10	10	34.4	381	381	0.94293	0.99991	0.84501	NA	4.5451	6596800000	3523800000	3073000000	2952200000	1546000000	1406100000	3633100000	1970600000	1662600000	10255000	6649300	3605700	1308600	578800	729830
WRS1	1	12	12	35.9	432	432	0.9456	0.95988	0.84468	0.91617	10.9	2431500000	1329100000	1102400000	886350000	488720000	397630000	1461300000	787750000	673530000	78950000	49766000	29184000	4889500	2828800	2060700
GDH1	2	15	15	43.2	454	454;457	0.9876	0.68336	0.84363	0.73568	2.2494	11384000000	6783800000	4600500000	4800500000	2537200000	2263300000	6293300000	4060400000	2232800000	232700000	149460000	83235000	57861000	36742000	21120000
DED81	1	15	15	25.8	554	554	1.0112	0.98439	0.84351	1.0599	45.697	25128000000	13478000000	11649000000	9625500000	4976200000	4649300000	15333000000	8396200000	6937200000	142620000	91383000	51235000	26026000	14489000	11537000
IPP1	1	12	12	49.1	287	287	0.97675	1.0037	0.84308	0.93839	4.6926	90404000000	47533000000	42871000000	42288000000	22334000000	19954000000	47944000000	25093000000	22851000000	126070000	80861000	45207000	46052000	25340000	20711000
	1	8	8	44.6	267	267	1.0728	0.97223	0.84275	NA	11.106	1801700000	975420000	826290000	682510000	336820000	345680000	1107000000	630920000	476040000	10964000	7005700	3958200	1281600	677140	604440
ERG6	1	16	16	41	383	383	0.99101	1.0184	0.84246	1.1742	5.9275	14346000000	7270500000	7075100000	5118900000	2577600000	2541300000	7457000000	3668400000	3788600000	906640000	582520000	324120000	863030000	441950000	421090000
SNX4	1	5	5	17	423	423	NA	0.99995	0.84206	0.92297	NA	146740000	81513000	65231000	0	0	0	140090000	77391000	62695000	4389700	2975600	1414100	2268500	1146500	1122000
EBP2	1	14	14	32.8	427	427	0.9217	1.0265	0.8415	1.0127	11.974	8936000000	4783300000	4152700000	4656200000	2464500000	2191700000	4271100000	2313900000	1957200000	4982100	2897000	2085100	3783800	2010000	1773900
GUS1	1	20	20	29.4	708	708	1.0253	0.9991	0.84131	1.1073	7.0833	28532000000	14395000000	14137000000	11304000000	5914700000	5389300000	17084000000	8390100000	8694300000	119860000	77870000	41993000	23421000	12235000	11186000
CCT4	1	7	7	16.9	528	528	0.9326	0.99501	0.84112	NA	4.1613	1719600000	958440000	761180000	810540000	452380000	358160000	900270000	500660000	399610000	7442200	4666900	2775400	1364700	726390	638340
YRA1	1	8	8	35.8	226	226	0.97524	0.93802	0.84065	1.027	0.11327	5190000000	2857100000	2333000000	2449000000	1330100000	1118900000	2669100000	1484300000	1184800000	31868000	20903000	10965000	40116000	21841000	18275000
URA2	1	28	27	18.1	2214	2214	0.987	0.99145	0.84043	1.0147	6.5251	13679000000	7232800000	6446300000	5901200000	3158100000	2743100000	7686600000	4022700000	3663900000	51987000	30487000	21500000	39388000	21548000	17841000
CDC3	1	19	19	48.1	520	520	0.98129	0.99325	0.84023	1.0286	11.635	6250900000	3166200000	3084700000	2434800000	1094400000	1340500000	3775000000	2053100000	1721900000	19641000	12106000	7535200	21418000	6618900	14799000
GFA1	1	11	11	18.3	717	717	1.0041	0.99809	0.84004	NA	8.5268	2625500000	1386400000	1239000000	1230000000	630690000	599280000	1381600000	746740000	634830000	12682000	8242700	4439400	1232700	777740	454950
RPG1	1	27	27	33.9	964	964	0.94207	0.9718	0.83956	0.94112	9.5483	25575000000	13917000000	11658000000	10631000000	5669000000	4961600000	14877000000	8209300000	6667600000	36415000	21657000	14759000	31298000	17419000	13879000
HOM2	1	12	12	39.5	365	365	0.99637	0.88995	0.83888	0.90345	7.2142	27040000000	14978000000	12062000000	11739000000	6214500000	5524500000	15043000000	8612400000	6430400000	203330000	119210000	84112000	54989000	31469000	23521000
CPA2	1	16	15	20.4	1118	1118	1.0092	1.1609	0.83633	NA	6.5157	2833900000	1501400000	1332500000	1523900000	765930000	757990000	1292600000	724380000	568180000	17443000	11101000	6342300	0	0	0
TEF4	1	15	14	33.7	412	412	0.97482	0.99407	0.83522	1.046	9.2201	25945000000	14082000000	11864000000	12426000000	6587200000	5838400000	12863000000	7088200000	5774500000	461570000	299610000	161950000	195510000	106690000	88821000
ADE16	1	11	8	25.9	591	591	0.97138	0.95812	0.83471	1.065	29.337	1673400000	898360000	775010000	840450000	443890000	396560000	763580000	400310000	363270000	65819000	52485000	13334000	3518800	1678000	1840900
STI1	1	29	29	53.8	589	589	1.0798	1.1481	0.83279	1.3759	6.3	47589000000	24167000000	23422000000	21385000000	10817000000	10568000000	26124000000	13309000000	12814000000	70344000	36268000	34077000	10232000	4793500	5438100
CCT6	1	10	10	19.2	546	546	1.0287	0.98169	0.83271	NA	3.2527	5553600000	2972200000	2581400000	2437500000	1257200000	1180300000	3110200000	1711200000	1399000000	5909200	3819400	2089800	0	0	0
MRH1	1	4	4	16.6	320	320	0.89361	0.93831	0.83191	1.0001	7.9734	18731000000	10430000000	8301000000	9603200000	5320500000	4282700000	8438400000	4715400000	3723000000	148530000	96665000	51861000	540890000	297390000	243500000
NPL3	1	3	3	7	414	414	1.0546	0.94662	0.83189	NA	11.35	3928500000	2266400000	1662200000	1492400000	756630000	735730000	2411700000	1494600000	917030000	18674000	11811000	6863200	5846300	3316900	2529400
HIS1	1	4	4	16.2	297	297	0.96498	1.0608	0.83175	NA	15.816	530750000	299500000	231250000	183770000	104520000	79255000	336550000	188030000	148520000	10433000	6954700	3478800	0	0	0
YEF3	2	35	35	36.6	1044	1044;1044	0.95432	0.97242	0.8316	1.0182	6.1597	123420000000	70086000000	53334000000	50768000000	28882000000	21886000000	71351000000	40400000000	30952000000	877110000	574020000	303090000	423460000	230180000	193270000
KAP123	1	11	11	11.3	1113	1113	0.96269	1.0257	0.83158	NA	11.747	19674000000	10370000000	9303800000	9506600000	4850200000	4656400000	10151000000	5508900000	4641700000	15355000	10211000	5144100	1129300	618800	510530
ADE6	1	14	14	15.2	1358	1358	0.96349	0.93924	0.83114	NA	30.768	5456800000	2955200000	2501600000	2459000000	1276700000	1182300000	2987900000	1672200000	1315800000	8553100	5580500	2972500	1364200	745900	618310
GND1	1	13	12	34.4	489	489	0.88036	0.96528	0.83078	0.95141	4.2938	21720000000	11882000000	9837800000	10080000000	5431900000	4647700000	11195000000	6174300000	5020800000	278520000	181170000	97349000	166510000	94553000	71960000
PGM1	1	10	8	28.6	570	570	NA	0.9117	0.8304	NA	NA	822130000	448560000	373560000	315950000	179150000	136800000	487010000	257190000	229820000	19163000	12218000	6945300	0	0	0
GUA1	1	14	14	28.4	525	525	0.95833	1.0163	0.83028	0.87	31.503	18542000000	9936500000	8605700000	9326700000	4896700000	4430000000	9142400000	4993900000	4148500000	66713000	42156000	24557000	6387900	3702500	2685400
RFS1	1	6	6	27.6	210	210	NA	NA	0.83003	0.9963	NA	228930000	113330000	115610000	189570000	89530000	100040000	0	0	0	17519000	11696000	5822700	21846000	12100000	9746200
PRO2	1	9	9	25.4	456	456	0.98421	1.0362	0.82981	NA	23.227	3734100000	1985300000	1748800000	1344100000	707500000	636610000	2358200000	1259800000	1098500000	30699000	17423000	13276000	1028300	560780	467540
PFK1	1	19	19	24.4	987	987	0.91566	0.97931	0.82878	1.0038	9.8358	13472000000	7273900000	6198500000	4898500000	2597500000	2301000000	8254800000	4480500000	3774300000	206520000	134270000	72248000	112610000	61661000	50950000
SEC53	1	8	8	38.2	254	254	0.97312	1.0127	0.82324	1.0847	5.2499	32918000000	17867000000	15051000000	16031000000	8621200000	7410000000	16846000000	9220000000	7626000000	36003000	23381000	12623000	4473600	2553300	1920300
PHO13	1	7	7	31.1	312	312	1.0018	1.0426	0.82219	NA	10.105	2310000000	1225400000	1084600000	645120000	335600000	309520000	1657600000	885160000	772470000	7256800	4650400	2606400	0	0	0
RPC40	1	5	5	26.9	335	335	0.97192	0.99319	0.82146	NA	4.5913	3472400000	1883500000	1588900000	1249500000	664670000	584800000	2212800000	1212600000	1000200000	8677300	5245000	3432300	1390800	907450	483370
ERG10	1	15	15	56	398	398	0.99145	1.0177	0.81991	NA	4.7431	5728600000	3177100000	2551500000	2301900000	1278400000	1023500000	3346500000	1844100000	1502400000	75682000	52095000	23587000	4512900	2524900	1988000
ZEO1	1	16	16	77.9	113	113	0.98315	0.98618	0.81916	1.0058	6.1037	156090000000	86181000000	69912000000	82945000000	44977000000	37968000000	72421000000	40707000000	31715000000	155790000	103920000	51873000	571620000	394050000	177580000
SER1	1	9	9	36.7	395	395	0.98223	0.93552	0.81915	NA	10.529	3099900000	1559400000	1540500000	1357900000	700440000	657410000	1719700000	844320000	875390000	22318000	14663000	7655500	0	0	0
ASN1	1	13	11	28.8	572	572	0.97486	1.1062	0.81905	1.0737	5.6529	13268000000	7019000000	6248900000	6264900000	3351700000	2913200000	6801800000	3534200000	3267600000	181170000	122200000	58972000	19938000	10844000	9093600
LHP1	1	7	7	22.9	275	275	0.98037	0.99055	0.81888	NA	5.5723	6447800000	3488000000	2959900000	3074600000	1640300000	1434400000	3366800000	1843300000	1523400000	5829900	3998300	1831600	602140	352830	249310
PUS7	1	6	6	14.5	676	676	0.94707	1.0638	0.81888	NA	5.3258	2873200000	1553800000	1319400000	1409100000	764220000	644860000	1435400000	763360000	672040000	17590000	15467000	2122900	11123000	10791000	331860
BCY1	1	14	14	35.3	416	416	1.0371	1.0169	0.8178	0.82456	14.686	6821300000	3534600000	3286700000	3115200000	1638000000	1477100000	3659100000	1868800000	1790300000	13052000	8778000	4274100	34041000	19040000	15001000
TAO3	1	10	10	5.9	2376	2376	1.2892	1.3417	0.81669	0.98269	1.0692	155700000	79873000	75823000	27021000	9776600	17245000	90548000	45755000	44793000	12947000	8663700	4282900	25181000	15678000	9502600
SLY1	1	6	6	14.9	666	666	1.0326	1.0156	0.81492	1.0862	10.461	3577700000	3144700000	433010000	1452600000	1303500000	149050000	2117800000	1836700000	281080000	3025700	1962300	1063400	4289100	2481400	1807700
UBA1	1	18	18	28.1	1024	1024	1.0193	0.99446	0.81426	1.0485	12.265	9093700000	4626300000	4467400000	4579600000	2277100000	2302500000	4441900000	2331300000	2110600000	52982000	13914000	39067000	19260000	3962600	15298000
CPA1	1	2	2	5.6	411	411	NA	0.924	0.81376	NA	NA	362570000	202030000	160540000	170730000	86016000	84716000	186490000	112220000	74278000	5338500	3792600	1546000	0	0	0
YPL199C	1	2	2	7.1	240	240	NA	NA	0.81081	0.95664	NA	7693800	4467000	3226800	0	0	0	0	0	0	3207600	2023900	1183700	4486200	2443100	2043100
HSP104	1	15	15	20.8	908	908	1.1457	1.1642	0.80943	NA	13.994	7241500000	3528100000	3713400000	3199400000	1518400000	1681000000	4000700000	1981600000	2019100000	41416000	28022000	13394000	0	0	0
HIS7	1	12	12	28.8	552	552	1.0018	1.008	0.8088	NA	6.1352	4045800000	1996400000	2049400000	1273600000	588100000	685510000	2751400000	1398400000	1353000000	20795000	9976100	10819000	0	0	0
GCD11	1	14	14	34.2	527	527	0.92017	0.9952	0.80825	0.97401	17.418	14154000000	7712300000	6442000000	6707200000	3547700000	3159500000	7371800000	4119000000	3252800000	49940000	31562000	18378000	25274000	13950000	11324000
DUT1	1	4	4	50.3	147	147	1.6681	1.3636	0.80695	NA	64.927	2696600000	1452800000	1243900000	1006100000	527140000	478950000	1685100000	922080000	762980000	5459600	3527200	1932400	0	0	0
	1	12	12	19.8	607	607	1.0292	0.96703	0.80695	NA	3.5007	6839700000	3522300000	3317400000	3646300000	1782800000	1863400000	3144300000	1715800000	1428500000	48153000	23164000	24988000	968390	535370	433010
ACS2	1	11	11	20.1	683	683	0.95341	0.95178	0.80542	0.88194	5.2608	13785000000	7688400000	6096700000	6403100000	3537000000	2866000000	7189400000	4029900000	3159500000	132130000	84694000	47435000	60468000	36726000	23742000
DPS1	1	21	21	37.9	557	557	0.98683	0.97868	0.80519	0.93145	14.058	28779000000	14889000000	13890000000	11124000000	5868100000	5256300000	17533000000	8944600000	8588000000	103670000	66343000	37328000	18413000	9773700	8639500
SEC21	1	8	8	13.4	935	935	0.97639	0.99789	0.80506	NA	38.649	5260000000	2818600000	2441400000	2809400000	1464200000	1345200000	2445600000	1351000000	1094600000	4950800	3362800	1588000	0	0	0
XRN1	1	19	19	14.8	1528	1528	1.058	0.97617	0.80357	1.0339	11.706	5886300000	3141400000	2745000000	1589000000	779380000	809580000	4289200000	2357200000	1932000000	2543200	1562000	981200	5591400	3169100	2422300
CSR1	1	9	9	26.5	408	408	1.0188	0.95335	0.80276	0.91039	26.625	4285200000	2282400000	2002800000	1566000000	758270000	807700000	2635700000	1468800000	1166900000	48924000	33255000	15669000	34563000	22061000	12502000
NSR1	1	7	7	18.4	414	414	0.93312	0.98479	0.80204	1.0051	11.391	12776000000	6970800000	5805500000	4266700000	2318000000	1948700000	8426800000	4601900000	3825000000	37105000	24896000	12209000	45537000	25936000	19601000
CDC33	1	4	4	19.2	213	213	1.003	0.98862	0.80118	NA	2.7135	12173000000	6830300000	5342700000	5549300000	3052900000	2496400000	6619300000	3774700000	2844600000	4341200	2692600	1648600	0	0	0
YCP4	1	7	7	37.7	247	247	1.0294	0.99975	0.79922	0.99522	2.3134	8801300000	4659000000	4142200000	4055300000	2092500000	1962900000	3977700000	2113100000	1864600000	294230000	194490000	99738000	474020000	258950000	215070000
TRP5	1	15	15	23.6	707	707	0.9837	0.99836	0.79879	1.1295	9.8483	11931000000	6593700000	5337100000	4953700000	2677300000	2276400000	6884200000	3854100000	3030000000	82976000	55722000	27254000	9888400	6575800	3312600
CCT7	1	10	10	25.5	550	550	0.97749	1.0056	0.79826	NA	5.6451	4563600000	2438900000	2124600000	2394200000	1250200000	1143900000	2164900000	1185900000	979010000	4516500	2829200	1687200	0	0	0
YPR147C	1	3	3	14.8	304	304	NA	NA	0.7979	NA	NA	7860100	5079100	2781000	0	0	0	0	0	0	7860100	5079100	2781000	0	0	0
RPN2	1	17	17	18.6	945	945	1.0167	1.0246	0.79775	0.91967	24.912	5293800000	2853600000	2440300000	1999400000	1019000000	980420000	3262400000	1813700000	1448800000	28809000	19153000	9655900	3185800	1774300	1411500
PRE9	1	4	4	25.2	258	258	1.0794	0.9659	0.79664	NA	4.2435	4283100000	2266600000	2016500000	2208100000	1115400000	1092700000	2066600000	1145600000	920990000	6933900	4548900	2385000	1462400	1020700	441710
SOD1	1	6	6	50.6	154	154	1.071	1.042	0.79638	NA	3.4898	48200000000	25406000000	22794000000	22987000000	11580000000	11407000000	25202000000	13819000000	11383000000	11500000	7466800	4033700	0	0	0
GLO1	1	4	4	17.5	326	326	1.1423	NA	0.79621	NA	13.432	815260000	420930000	394330000	630090000	325160000	304930000	173340000	88586000	84750000	9019700	5606700	3413000	2816700	1578100	1238500
TRM5	1	6	6	14.8	499	499	NA	1.0267	0.79534	NA	NA	131950000	73370000	58583000	64620000	35301000	29320000	64218000	36093000	28125000	3115000	1976400	1138600	0	0	0
FAB1	1	5	5	3.7	2278	2278	0.96164	NA	0.79359	0.96646	9.2054	68750000	41745000	27005000	40307000	21965000	18342000	0	0	0	11275000	7952600	3322200	17168000	11828000	5340400
COP1	1	12	12	10.6	1201	1201	1.0445	1.0495	0.79332	1.0109	16.517	2390000000	1290300000	1099700000	925390000	493650000	431740000	1459400000	793450000	665900000	3176300	2017300	1159000	2079300	1173800	905460
TIF34	1	12	12	42.7	347	347	1.0309	1.0012	0.79284	1.0529	14.854	8510300000	5734100000	2776200000	3791300000	2548000000	1243200000	4669400000	3155200000	1514200000	42295000	27056000	15239000	7361500	3853600	3507900
TPS1	1	3	3	8.5	495	495	NA	NA	0.79176	0.93807	NA	16552000	10393000	6159700	0	0	0	0	0	0	12137000	8050400	4087000	4414800	2342100	2072700
PUS1	1	9	9	21.3	544	544	0.96319	0.9766	0.79125	NA	6.2066	2740000000	1424700000	1315300000	988620000	521000000	467620000	1742700000	898060000	844590000	8744700	5615600	3129100	0	0	0
MET12	1	3	3	3.8	657	657	NA	NA	0.79047	NA	NA	37641000	17576000	20064000	16556000	8615300	7940300	19015000	7648300	11366000	2070300	1312600	757650	0	0	0
LYS9	1	12	12	42.4	446	446	1.008	1.0112	0.79038	NA	5.3966	2056400000	1071400000	985060000	801300000	403650000	397650000	1241200000	659850000	581310000	13963000	7865300	6097400	0	0	0
ILS1	1	22	22	23.7	1072	1072	0.99938	0.97526	0.79012	1.015	7.9144	38859000000	20995000000	17864000000	17473000000	9295100000	8178400000	21354000000	11680000000	9674600000	28776000	18884000	9892200	2506500	1621700	884790
ARG1	1	7	7	20.7	420	420	0.99528	0.90614	0.79009	NA	13.961	3214300000	1722500000	1491800000	1557700000	775480000	782240000	1646900000	940890000	706010000	9639000	6096400	3542700	0	0	0
URA5	1	5	5	30.5	226	226	0.99644	0.97151	0.78997	NA	9.036	10610000000	5795000000	4815400000	4925900000	2677300000	2248600000	5679000000	3113900000	2565100000	5563400	3812300	1751100	0	0	0
URA7	1	9	8	18.3	579	579	0.91411	1.0683	0.78975	NA	22.489	4267500000	2241300000	2026200000	2244400000	1199800000	1044600000	2001000000	1027700000	973350000	20384000	12768000	7616100	1676300	984370	691940
YGR266W	1	3	3	5.4	701	701	1.1835	1.1028	0.78915	0.96455	15.071	1063100000	509580000	553560000	190290000	91595000	98699000	848120000	402730000	445390000	13591000	8997400	4593200	11134000	6256400	4877900
MDY2	1	8	8	51.4	212	212	0.96605	1.0078	0.78837	NA	13.032	1939300000	1045100000	894200000	1021500000	550420000	471080000	914650000	492760000	421890000	2247200	1407500	839760	877260	489080	388180
TIF3	1	6	6	17.7	436	436	0.97593	1.0479	0.78675	NA	9.2572	11524000000	6236200000	5287900000	4285700000	2306500000	1979200000	7235000000	3927500000	3307500000	3339600	2165200	1174400	0	0	0
PCM1	1	7	7	14.4	557	557	1.1301	0.95281	0.78325	NA	2.8376	1269800000	658140000	611620000	528490000	258520000	269970000	735210000	395710000	339500000	5199700	3382800	1817000	868320	534400	333920
SUI3	1	14	14	42.8	285	285	0.92966	0.97365	0.78312	NA	12.265	17062000000	9419000000	7643400000	8602700000	4674900000	3927800000	8445000000	4735100000	3709900000	11068000	6959300	4108700	3662800	2081200	1581600
PSA1	1	11	11	28.8	361	361	0.94288	0.99395	0.78189	1.0154	6.4122	58325000000	32526000000	25800000000	27493000000	15444000000	12049000000	30476000000	16849000000	13627000000	306460000	204940000	101520000	49943000	27931000	22012000
CAR1	1	8	8	23.4	333	333	1.0364	1.1099	0.7769	NA	11.172	6569400000	3431300000	3138200000	3374100000	1710600000	1663500000	3169000000	1702800000	1466200000	26388000	17908000	8479500	0	0	0
GLK1	2	12	12	26.4	500	500;500	1.0851	0.97561	0.7767	NA	10.174	2919800000	1573200000	1346500000	1453200000	764350000	688820000	1352400000	733090000	619280000	105750000	71125000	34620000	8471800	4680100	3791700
YER156C	1	5	5	17.2	338	338	0.9454	0.94632	0.77573	NA	4.1239	1647300000	878380000	768870000	495190000	246800000	248380000	1147700000	628620000	519050000	4399200	2956300	1442900	0	0	0
EPS1	1	2	2	2.9	701	701	NA	NA	0.7627	NA	NA	28796000	14095000	14701000	0	0	0	25955000	12260000	13695000	2840700	1835500	1005200	0	0	0
SUB2	1	12	12	32.5	446	446	0.99512	1.0237	0.76141	NA	11.431	17137000000	9166800000	7970300000	9256100000	4923900000	4332200000	7847500000	4220100000	3627400000	33477000	22820000	10658000	0	0	0
NUS1	1	4	4	16.5	375	375	NA	1.0688	0.76029	0.97303	NA	169120000	91812000	77312000	14464000	3785100	10679000	117900000	66086000	51816000	12446000	7961100	4484600	24313000	13980000	10333000
ARO3	1	7	7	28.6	370	370	1.0008	1.024	0.75954	NA	8.1896	2485500000	1342200000	1143300000	1049500000	566170000	483290000	1423900000	768870000	655050000	10238000	5555700	4682700	1888800	1623400	265400
NEW1	1	17	17	20.2	1196	1196	0.9512	0.96403	0.75776	1.4422	12.644	9141000000	4071500000	5069500000	3298900000	1710500000	1588400000	5824500000	2350200000	3474300000	14977000	9660800	5316600	2615800	1117100	1498700
YPK2	1	5	4	9.9	677	677	NA	NA	0.75671	0.95713	NA	8124500	5264600	2859900	0	0	0	0	0	0	3838100	2653700	1184400	4286400	2610900	1675600
YPK1	1	6	5	11.3	680	680	NA	NA	0.75528	0.96832	NA	603120000	324410000	278710000	306470000	160670000	145800000	281860000	154630000	127230000	9898100	6178100	3720000	4886900	2923800	1963100
ADE5,7	1	8	8	12.2	802	802	0.98729	0.969	0.75344	NA	7.1009	3087000000	1672600000	1414400000	1381500000	739630000	641910000	1671800000	911140000	760660000	29868000	19772000	10096000	3828700	2064400	1764300
POL30	1	5	5	21.7	258	258	0.88929	1.0116	0.74776	NA	15.798	4609100000	2382200000	2226900000	1679600000	909190000	770360000	2926500000	1470800000	1455700000	3013300	2144400	868870	0	0	0
CAM1	1	9	8	23.1	415	415	0.99842	0.99699	0.74078	1.0664	4.834	5021700000	2567100000	2454600000	2695200000	1292200000	1403000000	2294200000	1254700000	1039500000	26324000	16950000	9374000	6025700	3279000	2746700
TPS2	1	5	5	8.4	896	896	1.2519	1.1193	0.73946	NA	8.4612	2266800000	1184400000	1082400000	557960000	266720000	291230000	1702700000	913670000	789030000	5257400	3514900	1742600	913120	502190	410930
NIP1	1	11	11	16.3	812	812	0.99768	1.0087	0.73859	NA	6.6887	4781300000	2552100000	2229200000	2267400000	1228400000	1039000000	2505200000	1317600000	1187600000	8661600	6175800	2485800	0	0	0
RCK2	1	7	7	13.1	610	610	1.0726	0.93034	0.73598	NA	21.057	606390000	346790000	259600000	146800000	70714000	76088000	452710000	271780000	180930000	5746500	3785300	1961200	1138300	514790	623540
ADE2	1	10	10	24.3	571	571	1.043	1.008	0.73332	0.98846	15.018	2234900000	1222100000	1012800000	774700000	390160000	384540000	1422400000	807220000	615220000	19415000	12963000	6451900	18360000	11797000	6562300
RTK1	1	4	4	10.5	620	620	0.5199	0.95559	0.72219	NA	57.962	290640000	164650000	125990000	88587000	47363000	41225000	196130000	113540000	82589000	4290000	2809100	1480900	1628600	935090	693520
TIF4632	1	17	16	29.8	914	914	1.0102	0.99814	0.71996	NA	16.935	8741600000	4037300000	4704300000	4896700000	1959900000	2936800000	3837600000	2072900000	1764800000	5595400	3733000	1862400	1694700	840720	853930
SHM2	1	12	12	24.5	469	469	0.97164	0.73525	0.71754	NA	7.7359	7869400000	4921500000	2947900000	2956200000	1766100000	1190200000	4876100000	3130700000	1745400000	34749000	23465000	11284000	2249100	1247000	1002100
RNR2	1	10	10	28.3	399	399	0.98611	0.97951	0.71342	NA	2.3991	19556000000	10288000000	9268500000	9574300000	5041400000	4532900000	9966400000	5235400000	4731000000	15495000	10893000	4602100	0	0	0
SRV2	1	14	14	41.8	526	526	1.0001	0.99359	0.71271	NA	3.6411	8589900000	4609500000	3980300000	4388600000	2305500000	2083100000	4172000000	2284500000	1887500000	27929000	18750000	9178600	1297900	778270	519650
WTM1	1	10	10	32.3	437	437	0.92456	1.0734	0.70385	NA	6.4303	12895000000	6859400000	6035800000	6267300000	3397300000	2870000000	6591000000	3437400000	3153600000	36862000	24670000	12192000	0	0	0
TRM82	1	7	7	20.5	444	444	1.1652	1.1556	0.69341	NA	252.67	1670800000	917910000	752860000	1102000000	759000000	342970000	564720000	156230000	408490000	4077600	2684100	1393500	0	0	0
ALD3;ALD2	2	4	4	10.9	506	506;506	NA	NA	0.68457	NA	NA	6811400	4705100	2106300	0	0	0	0	0	0	6811400	4705100	2106300	0	0	0
RPL14A	1	8	2	36.2	138	138	0.91899	0.99245	0.66953	0.56055	10.311	18453000000	3840800000	14612000000	10606000000	2700100000	7906000000	7805400000	1113300000	6692100000	24178000	15945000	8233700	17176000	11469000	5707000
MSC1	1	15	15	36.1	513	513	NA	NA	0.6683	0.79956	NA	253020000	171340000	81679000	0	0	0	0	0	0	217920000	150880000	67044000	35104000	20469000	14635000
PRB1	1	12	12	26.6	635	635	0.92991	1.0292	0.66292	0.97483	52.269	2973400000	1655200000	1318100000	780740000	414740000	366000000	1215500000	657100000	558410000	671800000	412780000	259030000	305330000	170630000	134700000
HXK1	1	13	10	41.2	485	485	1.1709	0.90465	0.6605	0.71369	17.162	3775200000	2014200000	1761000000	1240600000	619380000	621260000	2315100000	1248600000	1066500000	182440000	119200000	63239000	37021000	27030000	9991300
CWP1	1	8	8	34.7	239	239	0.9767	1.0109	0.65572	0.74072	6.4844	15523000000	8428400000	7094500000	4138900000	2308500000	1830400000	11229000000	6015500000	5213100000	109770000	76443000	33330000	45689000	28058000	17630000
TOM40	1	6	6	32.3	387	387	1.0515	1.02	0.64629	1.1317	1.9377	5066800000	2652300000	2414600000	2415400000	1224600000	1190800000	2628000000	1414900000	1213100000	9716300	6310500	3405700	13697000	6374700	7321900
ADE12	1	7	7	21.2	433	433	0.98218	0.96306	0.63421	NA	11.336	773700000	413140000	360550000	437020000	234260000	202760000	327740000	172480000	155260000	8941500	6408500	2533100	0	0	0
NAB2	1	8	8	29	525	525	1.0082	0.96964	0.62046	NA	5.6538	2232500000	1218600000	1013900000	1212900000	669840000	543070000	1014500000	545120000	469390000	5073900	3639200	1434800	0	0	0
ERG1	1	9	9	21.8	496	496	0.6891	1.0631	0.58681	1.062	12.206	4773000000	2878800000	1894200000	2016000000	1305700000	710370000	2147000000	1174200000	972820000	332130000	248060000	84067000	277810000	150880000	126940000
DCS1	1	6	6	21.4	350	350	0.97224	0.96626	0.57711	NA	7.954	1909500000	1005600000	903900000	759160000	390160000	369000000	1140700000	608850000	531810000	9715300	6617800	3097500	0	0	0
PGM2	1	9	7	19.2	569	569	0.56513	NA	0.562	NA	81.789	80401000	47023000	33378000	53710000	29922000	23788000	0	0	0	26690000	17101000	9589500	0	0	0
	1	8	8	36.3	201	201	0.96359	0.97407	0.55087	NA	3.9488	6889900000	3609300000	3280600000	2541000000	1180100000	1360900000	4339500000	2422800000	1916700000	9451800	6370700	3081100	0	0	0
CDC12	1	4	4	14.5	407	407	0.94577	0.98069	0.54389	NA	4.5468	486140000	293740000	192400000	205560000	117060000	88507000	234340000	138580000	95763000	22899000	18116000	4783200	23336000	19989000	3347600
HIS4	1	10	10	17.5	799	799	0.82636	1.0634	0.494	NA	15.311	3534400000	2030800000	1503500000	1611300000	1009400000	601840000	1917900000	1017400000	900450000	5213100	3969000	1244200	0	0	0
ATP4	1	5	5	25.8	244	244	1.0066	1.0368	0.49372	NA	5.7369	2712200000	1503400000	1208800000	755320000	417910000	337400000	1944300000	1075500000	868830000	12606000	10017000	2589100	0	0	0
MMF1	1	4	4	42.1	145	145	0.96525	0.94666	0.48965	NA	8.5453	4686200000	2513300000	2172900000	2162400000	1125000000	1037400000	2514400000	1380900000	1133500000	9415600	7382600	2033000	0	0	0
PET10	1	10	10	46.3	283	283	0.92896	1.0263	0.48429	1.1393	8.7496	1703900000	811450000	892490000	1012700000	419990000	592680000	484330000	254960000	229370000	113380000	85963000	27414000	93557000	50534000	43023000
ACS1	1	5	5	9.3	713	713	NA	NA	0.408	NA	NA	8302100	6368600	1933500	0	0	0	0	0	0	8302100	6368600	1933500	0	0	0
AIP1	1	6	6	12.2	615	615	1.0196	1.0608	0.39783	NA	6.4413	1153100000	613410000	539700000	562360000	296030000	266330000	586290000	314220000	272070000	4456400	3159100	1297300	0	0	0
