# Supplementary material for: A systematic approach to identify recycling endocytic cargo depending on the GARP complex
Source: eLife. 2019 Jan 29;8:e42837. doi: 10.7554/eLife.42837 (PMC6374077; doi:10.7554/eLife.42837)
Supplement: Figure 4—source data 3. [file elife-42837-fig4-data3.xlsx]

## Sheet: PEP4D
Gene.names	Number.of.proteins	Unique.peptides	Peptides.20170122.Pep4d.Celllysate.K8.	Sequence.coverage....	Sequence.length	Ratio.H.L.normalized.20170122.Pep4d.Celllysate.K8.	Ratio.H.L.normalized.20170122.Pep4d.Vacisol.K8.	Intensity	Intensity.L	Intensity.H	Intensity.20170122.Pep4d.Celllysate.K8.	Intensity.L.20170122.Pep4d.Celllysate.K8.	Intensity.H.20170122.Pep4d.Celllysate.K8.	Intensity.20170122.Pep4d.Vacisol.K8.	Intensity.L.20170122.Pep4d.Vacisol.K8.	Intensity.H.20170122.Pep4d.Vacisol.K8.
RPL9B	1	2	6	73.3	191	N/A	15.131	2521200000	188180000	2333000000	56912000	33257000	23656000	2464300000	154920000	2309300000
DNF1	1	21	0	22.8	1571	N/A	5.4026	2641800000	588530000	2053300000	0	0	0	2641800000	588530000	2053300000
PDR12	1	9	0	10.6	1511	N/A	5.1344	717480000	209410000	508070000	0	0	0	717480000	209410000	508070000
DNF2	1	12	0	14	1612	N/A	4.9373	721200000	173900000	547310000	0	0	0	721200000	173900000	547310000
CHS1	1	11	1	12.9	1131	N/A	4.5701	1210900000	303320000	907540000	55117000	23958000	31159000	1155700000	279360000	876380000
GSC2	1	4	0	10.9	1895	N/A	4.1555	131350000	32101000	99248000	0	0	0	131350000	32101000	99248000
SSO1	1	9	1	50	290	N/A	4.0393	3902600000	1105300000	2797300000	47376000	22408000	24968000	3855200000	1082800000	2772300000
PUN1	1	2	1	7.2	263	N/A	3.6612	233950000	61122000	172830000	0	0	0	233950000	61122000	172830000
DFG5	1	4	0	21.4	458	N/A	3.6168	277250000	68679000	208570000	0	0	0	277250000	68679000	208570000
LEM3	1	8	0	21.5	414	N/A	3.5541	1065900000	308720000	757130000	0	0	0	1065900000	308720000	757130000
YLR326W	1	1	0	6.2	240	N/A	3.5223	284500000	83023000	201470000	0	0	0	284500000	83023000	201470000
YPS1	1	3	0	4.4	569	N/A	3.425	806620000	234750000	571870000	0	0	0	806620000	234750000	571870000
DNF3	1	7	0	6.8	1656	N/A	3.3752	260270000	75286000	184980000	0	0	0	260270000	75286000	184980000
FLC2	1	10	0	16.2	783	N/A	3.235	1569100000	460040000	1109000000	0	0	0	1569100000	460040000	1109000000
Uncharacterized protein YBR016W	1	2	1	24.2	128	2.016	2.9315	530560000	169870000	360690000	271320000	90634000	180690000	259240000	79237000	180000000
PTM1	1	4	0	7.8	523	N/A	2.8823	386420000	115020000	271400000	0	0	0	386420000	115020000	271400000
CHS3	1	23	2	30.6	1165	2.267	2.8819	1953900000	652540000	1301400000	237500000	87117000	150380000	1716400000	565430000	1151000000
TLG2	1	7	0	22.4	397	N/A	2.738	699210000	224510000	474700000	0	0	0	699210000	224510000	474700000
SED4	1	4	1	6.9	1065	N/A	2.7022	558930000	281110000	277820000	410800000	208360000	202440000	148130000	72758000	75372000
FKS1	1	12	2	15.8	1876	1.2699	2.6332	14173000000	6126800000	8046200000	6831800000	3477400000	3354300000	7341200000	2649400000	4691900000
YPL199C	1	2	0	6.7	240	N/A	2.6247	46577000	16415000	30163000	0	0	0	46577000	16415000	30163000
ENP1	1	5	2	18.2	483	0.86633	2.5984	733790000	319900000	413880000	370400000	202720000	167670000	363390000	117180000	246210000
SLG1	1	4	0	18.3	378	N/A	2.5187	2391700000	851070000	1540600000	0	0	0	2391700000	851070000	1540600000
SKG6	1	4	2	10.5	734	1.0024	2.4997	934360000	455850000	478500000	746240000	376410000	369830000	188120000	79442000	108680000
SKG1	1	4	0	24.8	355	N/A	2.4825	505110000	180400000	324710000	0	0	0	505110000	180400000	324710000
FPR2	1	2	1	17.8	135	1.1792	2.3641	674470000	221160000	453310000	236220000	118000000	118210000	438250000	103160000	335100000
TDH1	1	10	8	70.2	332	N/A	2.3549	3478400000	1060500000	2417900000	1074700000	202660000	872070000	2403700000	857880000	1545800000
VPS45	1	5	0	10.7	577	N/A	2.3471	303260000	113370000	189890000	0	0	0	303260000	113370000	189890000
MKC7	1	3	0	8.9	596	N/A	2.3386	1032600000	367810000	664790000	0	0	0	1032600000	367810000	664790000
PRB1	1	18	1	44.9	635	N/A	2.3369	14968000000	4991100000	9977400000	7084400	1720700	5363700	14961000000	4989400000	9972000000
PLB1	1	1	0	2.4	664	N/A	2.3266	111340000	48825000	62520000	0	0	0	111340000	48825000	62520000
Cell wall protein YJL171C	1	3	0	13.6	396	N/A	2.3068	3034600000	1128900000	1905600000	0	0	0	3034600000	1128900000	1905600000
CRH1	1	5	2	11	507	1.6833	2.214	1916400000	756130000	1160300000	988380000	422920000	565460000	928010000	333220000	594790000
RSC6	1	4	1	13	483	N/A	2.1756	105320000	42899000	62418000	45942000	28655000	17287000	59374000	14244000	45131000
EXG2	1	3	0	6	562	N/A	2.1337	70236000	27113000	43123000	0	0	0	70236000	27113000	43123000
FLC1	1	4	1	6.1	793	N/A	2.1155	153660000	54444000	99219000	0	0	0	153660000	54444000	99219000
SPT14	1	2	0	5.8	452	N/A	2.1063	33469000	14649000	18819000	0	0	0	33469000	14649000	18819000
NPR1	1	6	1	14.2	790	N/A	2.0675	1232200000	508670000	723530000	41488000	16282000	25205000	1190700000	492390000	698330000
HMO1	1	3	3	15.4	246	0.98789	2.0663	1780900000	1162800000	618100000	1506800000	1054900000	451890000	274060000	107850000	166210000
PHO90	1	8	0	16.2	881	N/A	2.0617	703470000	278230000	425240000	0	0	0	703470000	278230000	425240000
CET1	1	3	1	6.9	549	N/A	2.0523	140150000	75203000	64943000	81504000	48808000	32696000	58642000	26395000	32248000
RSN1	1	21	1	22.9	953	N/A	2.0405	6875200000	2758500000	4116700000	70697000	33697000	37000000	6804500000	2724800000	4079700000
ZRT2	1	2	0	9.5	422	N/A	2.0346	343660000	144630000	199020000	0	0	0	343660000	144630000	199020000
PTR2	1	6	1	11.5	601	N/A	2.0247	3357700000	1741000000	1616700000	409840000	193720000	216120000	2947900000	1547300000	1400500000
JEM1	1	5	0	8.8	645	N/A	1.9907	323880000	162340000	161540000	0	0	0	323880000	162340000	161540000
STE13	1	13	2	19.9	931	N/A	1.9846	913940000	372080000	541850000	143570000	52166000	91401000	770370000	319920000	450450000
DID2	1	4	1	26	204	N/A	1.9809	353610000	166480000	187130000	174330000	84642000	89685000	179280000	81833000	97445000
Protein-glutamate O-methyltransferase	1	4	2	9.1	470	1.0295	1.9767	385020000	158750000	226270000	283820000	132500000	151320000	101200000	26254000	74949000
BEM2	1	6	2	4.4	2167	0.84925	1.9525	306850000	147050000	159800000	178820000	89776000	89045000	128030000	57275000	70751000
HNM1	1	3	0	9.8	563	N/A	1.9518	354620000	139020000	215600000	0	0	0	354620000	139020000	215600000
TRM5	1	2	0	4.6	499	N/A	1.9195	61601000	30525000	31076000	0	0	0	61601000	30525000	31076000
PSD1	1	3	0	8.4	500	N/A	1.903	150030000	64566000	85467000	0	0	0	150030000	64566000	85467000
YCK2	1	8	2	31.7	546	1.0763	1.894	2275400000	1003900000	1271500000	706680000	328230000	378450000	1568700000	675660000	893050000
ARE2	1	6	1	10.4	642	N/A	1.885	1657200000	623950000	1033300000	82214000	36371000	45843000	1575000000	587580000	987440000
NPC2	1	4	1	23.1	173	N/A	1.8691	741010000	315010000	426000000	110000000	49188000	60810000	631010000	265820000	365190000
PMA1;PMA2	2	22	7	33.8	918	0.96426	1.8664	56741000000	23799000000	32942000000	2892600000	1514400000	1378200000	53849000000	22285000000	31564000000
GNP1	1	4	2	6.9	663	N/A	1.8556	1057800000	447130000	610720000	451260000	212070000	239190000	606580000	235050000	371530000
ALG12	1	5	1	9.1	551	N/A	1.8424	465620000	212550000	253070000	0	0	0	465620000	212550000	253070000
STE18	1	4	1	72.7	110	N/A	1.8227	129300000	70367000	58930000	0	0	0	129300000	70367000	58930000
HXT3	1	3	3	14.8	567	1.2918	1.8211	4682500000	2072000000	2610600000	4536400000	1998200000	2538100000	146170000	73761000	72412000
INO1	1	12	6	29.6	533	2.0135	1.8196	11956000000	4314000000	7641600000	8234000000	2798500000	5435500000	3721600000	1515600000	2206000000
EPT1	1	3	1	6.4	391	N/A	1.8183	371810000	162090000	209720000	99046000	51125000	47921000	272770000	110970000	161800000
SIL1	1	5	1	22.1	421	N/A	1.8025	527350000	239500000	287850000	119550000	50753000	68799000	407790000	188740000	219050000
AMS1	1	3	0	3.3	1083	N/A	1.7978	137980000	61707000	76271000	0	0	0	137980000	61707000	76271000
TAO3	1	4	1	2.4	2376	N/A	1.7875	142960000	67175000	75785000	60599000	27167000	33433000	82361000	40008000	42352000
SKN1	1	3	0	8.8	771	N/A	1.7811	92331000	38678000	53653000	0	0	0	92331000	38678000	53653000
ERO1	1	14	0	31.6	563	N/A	1.7793	4686500000	2002100000	2684400000	0	0	0	4686500000	2002100000	2684400000
UBC6	1	3	0	22	250	N/A	1.7688	87562000	49662000	37900000	0	0	0	87562000	49662000	37900000
YCR102C	2	1	0	2.2	368	N/A	1.7633	78932000	32017000	46916000	0	0	0	78932000	32017000	46916000
PDR5	2	16	1	16.2	1511	1.3749	1.7604	2381200000	1084900000	1296300000	291550000	144300000	147250000	2089600000	940590000	1149000000
BAP2	1	5	1	11.2	609	N/A	1.7531	1831100000	777160000	1054000000	0	0	0	1831100000	777160000	1054000000
NUR1	1	3	1	7.9	484	N/A	1.7509	199660000	113920000	85740000	39757000	25949000	13808000	159910000	87975000	71933000
PDI1	1	24	8	59.8	522	1.3186	1.7452	20785000000	9143600000	11642000000	1828800000	807440000	1021400000	18957000000	8336100000	10620000000
SNF7	1	3	2	13.8	240	1.1361	1.7259	1348600000	657570000	690990000	1274100000	624880000	649220000	74459000	32683000	41776000
BGL2	1	9	4	52.7	313	1.0881	1.7221	22340000000	10358000000	11982000000	10667000000	5096100000	5571400000	11673000000	5262000000	6410900000
RPD3	1	3	1	10.6	433	N/A	1.7196	118150000	53900000	64247000	77692000	33693000	43999000	40456000	20207000	20249000
OSW7	1	8	0	19.2	510	N/A	1.7178	516270000	220900000	295370000	0	0	0	516270000	220900000	295370000
EMC4	1	4	2	28.9	190	1.0744	1.7103	1721700000	788540000	933170000	1650700000	755440000	895280000	70985000	33101000	37884000
YOL019W	1	7	2	22	551	1.8216	1.7101	667850000	298260000	369590000	171680000	67878000	103810000	496170000	230380000	265780000
RHO1	1	5	1	34	209	N/A	1.7042	21306000000	9500300000	11806000000	27418000	13789000	13629000	21279000000	9486500000	11792000000
IST1	1	2	0	5.7	298	N/A	1.7027	62411000	31971000	30440000	0	0	0	62411000	31971000	30440000
YET1	1	7	1	19.9	206	N/A	1.7024	1209800000	551690000	658100000	85928000	67470000	18458000	1123900000	484220000	639640000
OLE1	1	14	3	35.5	510	1.1054	1.6969	3616700000	1653800000	1963000000	720250000	335780000	384470000	2896500000	1318000000	1578500000
Uncharacterized protein YNL134C	1	10	6	49.5	376	2.773	1.6874	12865000000	3834900000	9030400000	11199000000	3097700000	8101100000	1666500000	737160000	929300000
STE24	1	6	1	16.8	453	N/A	1.6686	362140000	172270000	189880000	0	0	0	362140000	172270000	189880000
YIL108W	1	10	1	20.3	696	2.051	1.6658	969200000	448410000	520780000	54579000	23623000	30956000	914620000	424790000	489830000
ERG26	1	9	2	47.6	349	2.0001	1.6556	4680200000	2025300000	2654900000	1412800000	597200000	815640000	3267300000	1428000000	1839300000
RVS161	1	2	0	12.8	265	N/A	1.6533	66403000	32706000	33697000	0	0	0	66403000	32706000	33697000
YCK1	1	3	0	11.9	538	N/A	1.6529	1034900000	424550000	610350000	0	0	0	1034900000	424550000	610350000
YKL077W	1	4	0	11.5	392	N/A	1.6486	1825900000	869530000	956410000	0	0	0	1825900000	869530000	956410000
EUG1	1	10	0	28.4	517	N/A	1.6433	1774000000	825800000	948240000	0	0	0	1774000000	825800000	948240000
DPL1	1	12	0	38.9	589	N/A	1.6379	2312300000	1048300000	1264000000	0	0	0	2312300000	1048300000	1264000000
YDL121C	1	4	1	34.9	149	N/A	1.6341	443200000	210470000	232740000	44026000	20049000	23977000	399180000	190420000	208760000
IML2	1	5	0	6.3	731	N/A	1.6335	532960000	266070000	266890000	0	0	0	532960000	266070000	266890000
STV1	1	6	1	10.8	890	N/A	1.6309	535620000	223890000	311730000	54773000	24153000	30620000	480840000	199740000	281110000
MNS1	1	5	0	15.3	549	N/A	1.6252	216080000	99894000	116180000	0	0	0	216080000	99894000	116180000
GPI13	1	3	0	5.4	1017	N/A	1.6149	30670000	15441000	15229000	0	0	0	30670000	15441000	15229000
FUI1	1	3	0	6.1	639	N/A	1.6127	168050000	77502000	90545000	0	0	0	168050000	77502000	90545000
UTH1	1	6	1	27.1	365	N/A	1.6124	1043600000	520370000	523220000	0	0	0	1043600000	520370000	523220000
ANP1	1	6	1	14.4	500	N/A	1.6115	382560000	178670000	203890000	0	0	0	382560000	178670000	203890000
GTT1	1	7	1	39.3	234	N/A	1.6078	412010000	172060000	239950000	0	0	0	412010000	172060000	239950000
YLR072W	1	2	0	3.5	693	N/A	1.6062	101100000	48513000	52585000	0	0	0	101100000	48513000	52585000
KAR2	1	41	6	55.4	682	1.1944	1.6006	88167000000	40510000000	47657000000	2674100000	1240300000	1433700000	85493000000	39270000000	46224000000
VPS29	1	8	0	46.1	282	N/A	1.5975	1144400000	516150000	628270000	0	0	0	1144400000	516150000	628270000
KRE5	1	20	0	19.8	1365	N/A	1.5958	1399400000	637430000	761960000	0	0	0	1399400000	637430000	761960000
PMC1	1	39	2	45.4	1173	1.7414	1.593	28260000000	12817000000	15443000000	822980000	246600000	576390000	27437000000	12571000000	14867000000
RNY1	1	4	0	17.3	434	N/A	1.5912	444390000	189620000	254780000	0	0	0	444390000	189620000	254780000
CIT2	1	3	1	10.7	460	1.3379	1.587	471390000	202720000	268660000	346810000	153010000	193800000	124580000	49717000	74865000
ERG4	1	3	0	6.3	473	N/A	1.5857	135330000	58629000	76703000	0	0	0	135330000	58629000	76703000
ENA2;ENA5	2	2	3	30.8	1091	1.356	1.5851	7712600000	3588300000	4124300000	293820000	130270000	163550000	7418800000	3458000000	3960800000
EMP70	1	3	0	7	667	N/A	1.5849	561080000	240060000	321020000	0	0	0	561080000	240060000	321020000
NTE1	1	6	0	5.1	1679	N/A	1.5842	331910000	143870000	188050000	0	0	0	331910000	143870000	188050000
HFD1	1	9	0	21.2	532	N/A	1.5834	1249600000	575740000	673840000	0	0	0	1249600000	575740000	673840000
PEP8	1	6	1	33.5	379	1.1316	1.5831	2439000000	1141300000	1297700000	1067700000	504860000	562820000	1371400000	636480000	734880000
CCW14	1	3	3	18.1	238	1.0657	1.5821	9372600000	4487800000	4884800000	8159600000	3921100000	4238500000	1213000000	566720000	646290000
MRH1	1	3	0	12.8	320	N/A	1.5786	5772200000	2731400000	3040800000	0	0	0	5772200000	2731400000	3040800000
Probable intramembrane protease YKL100C	1	3	0	7	587	N/A	1.5774	1329300000	640960000	688370000	0	0	0	1329300000	640960000	688370000
DID4	1	3	0	14.2	232	N/A	1.5765	231280000	108300000	122980000	0	0	0	231280000	108300000	122980000
CTS1	1	3	1	6.2	562	1.1673	1.5757	3658900000	1460500000	2198500000	1602000000	745640000	856320000	2057000000	714810000	1342200000
CHO2	1	13	1	20.4	869	N/A	1.5754	2262700000	1081200000	1181500000	27320000	12575000	14744000	2235400000	1068600000	1166800000
YSY6	1	1	0	20	65	N/A	1.5701	1725700000	819030000	906640000	0	0	0	1725700000	819030000	906640000
TPO4	1	2	1	5.9	659	N/A	1.5691	66421000	27676000	38745000	0	0	0	66421000	27676000	38745000
SSM4	1	6	0	5.7	1319	N/A	1.5618	189090000	83724000	105370000	0	0	0	189090000	83724000	105370000
LIP1	1	3	1	20	150	N/A	1.5616	3374100000	1655800000	1718300000	2709500000	1355200000	1354300000	664560000	300550000	364010000
PRM5	1	8	0	32.1	318	N/A	1.5595	5669000000	2669200000	2999800000	0	0	0	5669000000	2669200000	2999800000
RAX1	1	3	0	8.3	435	N/A	1.5592	554750000	250350000	304400000	0	0	0	554750000	250350000	304400000
GIS4	1	3	0	7.1	774	N/A	1.5556	159730000	74243000	85486000	0	0	0	159730000	74243000	85486000
ERG9	1	5	1	13.3	444	N/A	1.5553	505360000	229170000	276180000	65725000	30247000	35478000	439630000	198930000	240710000
YOR1	1	2	0	1.8	1477	N/A	1.5543	90475000	42747000	47728000	0	0	0	90475000	42747000	47728000
YET3	1	4	2	25.6	203	N/A	1.5542	368050000	175050000	193010000	65465000	29762000	35703000	302590000	145280000	157300000
CPR5	1	5	1	31.6	225	N/A	1.5521	1510100000	708520000	801530000	0	0	0	1510100000	708520000	801530000
YUR1	1	1	0	3.3	428	N/A	1.5508	83512000	38435000	45077000	0	0	0	83512000	38435000	45077000
Uncharacterized glycosyl hydrolase YIR007W	1	3	0	6.8	764	N/A	1.5444	145860000	64062000	81799000	0	0	0	145860000	64062000	81799000
SEC5	1	2	0	3.6	971	N/A	1.543	18964000	9223800	9740500	0	0	0	18964000	9223800	9740500
CHS7	1	2	0	6.6	316	N/A	1.5429	415510000	192600000	222910000	0	0	0	415510000	192600000	222910000
RPT1	1	4	1	13.9	467	1.1496	1.5357	201630000	92304000	109320000	128290000	59692000	68601000	73335000	32613000	40723000
LHS1	1	26	1	43	881	N/A	1.5288	7159800000	3448700000	3711000000	0	0	0	7159800000	3448700000	3711000000
IPT1	1	2	0	6.1	527	N/A	1.523	60896000	28036000	32859000	0	0	0	60896000	28036000	32859000
Uncharacterized protein YBR096W	1	3	2	19.1	230	N/A	1.5224	432050000	207700000	224350000	207560000	103300000	104260000	224490000	104400000	120090000
YPT32	1	6	1	46.4	222	N/A	1.5223	1504400000	706190000	798250000	96540000	45154000	51386000	1407900000	661040000	746860000
IRC22	1	3	0	5.8	225	N/A	1.5212	1181900000	534470000	647390000	0	0	0	1181900000	534470000	647390000
GPI11	1	2	0	14.2	219	N/A	1.5202	170480000	80582000	89897000	0	0	0	170480000	80582000	89897000
ISC1	1	2	0	7.3	477	N/A	1.5145	118720000	55708000	63014000	0	0	0	118720000	55708000	63014000
CAX4	1	2	0	7.5	239	N/A	1.5138	118550000	58597000	59956000	0	0	0	118550000	58597000	59956000
MRL1	1	4	0	12.9	381	N/A	1.51	665370000	325300000	340060000	0	0	0	665370000	325300000	340060000
SAC1	1	15	2	34	623	1.1005	1.5077	3601100000	1727300000	1873800000	181940000	92871000	89068000	3419200000	1634400000	1784700000
PLB3	1	3	0	6.9	686	N/A	1.5071	522540000	258530000	264010000	0	0	0	522540000	258530000	264010000
UBX2	1	6	0	15.8	584	N/A	1.5065	303700000	156730000	146970000	0	0	0	303700000	156730000	146970000
TCB1	1	25	2	27.2	1186	1.112	1.5062	4082500000	1914900000	2167600000	445180000	205370000	239810000	3637300000	1709500000	1927800000
HMG1	1	17	0	22.9	1054	N/A	1.4987	7029200000	3274900000	3754300000	0	0	0	7029200000	3274900000	3754300000
CWP1	1	8	4	34.7	239	1.03	1.4935	9027700000	4573100000	4454600000	2447800000	1322900000	1124900000	6579900000	3250200000	3329700000
LAC1	1	2	1	7.2	418	N/A	1.4935	513290000	252490000	260790000	404130000	196520000	207610000	109160000	55976000	53184000
NNF2	1	4	0	5.1	936	N/A	1.4928	248860000	110600000	138260000	0	0	0	248860000	110600000	138260000
CBR1	1	13	2	53.2	284	N/A	1.4912	8213400000	3874900000	4338600000	50524000	26479000	24045000	8162900000	3848400000	4314500000
ALD5	1	6	4	14.4	520	1.0738	1.4858	1081700000	506450000	575230000	979740000	459500000	520240000	101940000	46949000	54989000
SPF1	1	28	4	35.3	1215	1.0684	1.4831	12641000000	6098100000	6542800000	1938500000	909360000	1029200000	10702000000	5188800000	5513600000
Putative serine carboxypeptidase YBR139W	1	6	0	14	508	N/A	1.483	3530600000	1134000000	2396600000	0	0	0	3530600000	1134000000	2396600000
DBP9	1	4	1	9.4	594	N/A	1.483	492570000	145390000	347180000	139850000	72093000	67759000	352720000	73294000	279420000
VPS17	1	8	0	22.5	551	N/A	1.4769	857680000	437000000	420680000	0	0	0	857680000	437000000	420680000
ERJ5	1	2	0	11.5	295	N/A	1.4764	189840000	94707000	95129000	0	0	0	189840000	94707000	95129000
SWP1	1	3	0	12.9	286	N/A	1.4761	1288200000	599790000	688430000	0	0	0	1288200000	599790000	688430000
YOS9	1	5	0	17.3	542	N/A	1.4744	498910000	238610000	260310000	0	0	0	498910000	238610000	260310000
PMT6	1	3	1	7.6	759	1.0684	1.473	706290000	355050000	351240000	203360000	110400000	92962000	502930000	244650000	258280000
TNA1	1	9	1	20.2	534	1.1235	1.4712	4522200000	2223900000	2298300000	575270000	262340000	312930000	3947000000	1961600000	1985400000
PMT1	1	11	3	16.3	817	1.121	1.4707	5673300000	2687500000	2985800000	830870000	403110000	427760000	4842500000	2284400000	2558000000
TOS1	1	4	1	18	455	N/A	1.4698	573050000	281340000	291710000	51625000	21825000	29800000	521420000	259510000	261910000
SHE10	1	17	0	33.4	577	N/A	1.4696	6309100000	3086400000	3222700000	0	0	0	6309100000	3086400000	3222700000
SEC62	1	8	0	33.9	274	N/A	1.4689	1583100000	754970000	828140000	0	0	0	1583100000	754970000	828140000
Uncharacterized protein YDR056C	1	2	1	10.2	205	N/A	1.4686	401040000	189460000	211580000	86220000	41312000	44908000	314820000	148140000	166670000
HRD3	1	3	1	4.6	833	N/A	1.4667	185920000	86411000	99512000	33880000	15144000	18736000	152040000	71268000	80776000
BRE5	1	6	3	17.5	515	1.1933	1.4666	1559200000	768260000	790980000	1408500000	698300000	710190000	150740000	69958000	80781000
CAN1	1	2	1	4.1	590	1.7114	1.4654	318500000	154630000	163870000	84678000	34515000	50163000	233830000	120120000	113710000
SEC12	1	7	0	25.3	471	N/A	1.4647	1208500000	554170000	654330000	0	0	0	1208500000	554170000	654330000
BIG1	1	3	0	9.9	335	N/A	1.4644	139400000	41116000	98287000	0	0	0	139400000	41116000	98287000
SPC3	1	5	0	40.2	184	N/A	1.463	1017500000	458770000	558710000	0	0	0	1017500000	458770000	558710000
WBP1	1	11	0	41.2	430	N/A	1.4627	4374200000	2076700000	2297500000	0	0	0	4374200000	2076700000	2297500000
COS6	1	2	1	17.1	381	N/A	1.4612	657850000	316580000	341280000	0	0	0	657850000	316580000	341280000
OSH6	1	7	1	17.4	448	N/A	1.4601	855340000	401470000	453870000	178490000	82126000	96360000	676850000	319340000	357510000
Uncharacterized glycosyl hydrolase YBR056W	1	18	0	43.5	501	N/A	1.4593	3533300000	1753100000	1780200000	0	0	0	3533300000	1753100000	1780200000
HSV2	1	5	0	18.1	448	N/A	1.4571	305620000	143850000	161760000	0	0	0	305620000	143850000	161760000
SMY1	1	3	0	8.5	656	N/A	1.4559	62643000	26711000	35932000	0	0	0	62643000	26711000	35932000
CWH41	1	13	1	20.6	833	0.91939	1.4559	2288100000	1097400000	1190700000	420860000	208010000	212840000	1867300000	889430000	977820000
AIM18	1	2	0	5.6	321	N/A	1.4551	52699000	27745000	24953000	0	0	0	52699000	27745000	24953000
DPM1	1	6	1	31.1	267	N/A	1.4503	2161300000	1020500000	1140800000	816510000	358990000	457520000	1344800000	661520000	683290000
MPD1	1	8	0	31.8	318	N/A	1.4502	807610000	394980000	412630000	0	0	0	807610000	394980000	412630000
OST1	1	7	1	25.4	476	N/A	1.4466	1706800000	807460000	899360000	0	0	0	1706800000	807460000	899360000
LCB1	1	11	2	28.7	558	0.97612	1.4444	2597600000	1226500000	1371000000	348800000	175660000	173140000	2248800000	1050900000	1197900000
SCW4	1	7	2	29.8	386	N/A	1.4442	812120000	401970000	410150000	29396000	13865000	15531000	782730000	388110000	394620000
ERP4	1	3	1	21.7	207	N/A	1.4422	236130000	114150000	121980000	64240000	33825000	30415000	171890000	80325000	91567000
PKR1	1	3	0	35.2	122	N/A	1.4403	306950000	154610000	152340000	0	0	0	306950000	154610000	152340000
GPT2	1	7	0	13.3	743	N/A	1.4384	860490000	424520000	435970000	0	0	0	860490000	424520000	435970000
PMR1	1	9	0	11.2	950	N/A	1.4329	614450000	282250000	332200000	0	0	0	614450000	282250000	332200000
SSE2	1	5	1	14.7	693	N/A	1.4321	115500000	56660000	58840000	0	0	0	115500000	56660000	58840000
SMI1	1	6	2	16.8	505	1.1321	1.4311	732430000	365820000	366610000	529750000	262790000	266960000	202680000	103030000	99652000
TED1	1	6	1	16.3	473	N/A	1.4304	1688500000	817600000	870940000	33388000	15397000	17991000	1655100000	802200000	852940000
MSC1	1	15	0	41.7	513	N/A	1.4299	2465800000	1247900000	1217800000	0	0	0	2465800000	1247900000	1217800000
IDH1	1	2	0	9.2	360	N/A	1.4297	97876000	48859000	49017000	0	0	0	97876000	48859000	49017000
FPK1	1	4	0	6.7	893	N/A	1.4287	245530000	129430000	116100000	0	0	0	245530000	129430000	116100000
PHO87	1	4	1	8.7	923	N/A	1.4274	237480000	135170000	102310000	52218000	33305000	18913000	185260000	101870000	83396000
GAS1	1	11	4	28.1	559	0.90395	1.4267	38290000000	18824000000	19466000000	3670900000	1921900000	1749000000	34619000000	16902000000	17717000000
MSC7	1	18	1	42.4	644	N/A	1.425	5016800000	2453900000	2562800000	25712000	12139000	13573000	4991100000	2441800000	2549300000
ISW1	1	5	3	6.1	1129	0.45389	1.4238	821910000	488140000	333760000	690510000	424370000	266150000	131390000	63777000	67616000
MNN9	1	3	0	10.1	395	N/A	1.4228	838790000	359660000	479130000	0	0	0	838790000	359660000	479130000
MPD2	1	4	0	17.7	277	N/A	1.4225	803230000	400670000	402560000	0	0	0	803230000	400670000	402560000
GSF2	1	8	2	31	403	N/A	1.4224	1858100000	930210000	927920000	228490000	111260000	117230000	1629600000	818950000	810690000
SEC66	1	7	0	43.2	206	N/A	1.4214	2442600000	1191200000	1251400000	0	0	0	2442600000	1191200000	1251400000
TAT1	1	5	1	10	619	1.1064	1.4209	868270000	419100000	449180000	244380000	111730000	132650000	623890000	307360000	316530000
PMT3	1	7	1	14.1	753	N/A	1.4179	577820000	291880000	285940000	36621000	24154000	12468000	541200000	267720000	273480000
SEC63	1	21	3	44.3	663	1.0449	1.4178	9705300000	4678500000	5026800000	319450000	165200000	154250000	9385900000	4513300000	4872500000
UTR2	1	2	1	5.6	467	N/A	1.4168	2752000000	1362000000	1390000000	0	0	0	2752000000	1362000000	1390000000
CDS1	1	7	2	13.1	457	1.0127	1.4154	5603100000	2725600000	2877600000	3172000000	1519100000	1652900000	2431200000	1206500000	1224700000
CNE1	1	4	0	14.1	502	N/A	1.4153	255610000	130410000	125200000	0	0	0	255610000	130410000	125200000
SEC17	1	7	2	28.1	292	1.2305	1.4151	1001800000	459200000	542560000	594790000	279570000	315220000	406960000	179630000	227330000
RPT4	1	2	0	5.5	437	N/A	1.4146	162740000	73424000	89316000	0	0	0	162740000	73424000	89316000
PHO88	1	8	4	45.7	188	1.0559	1.4137	9225500000	4558200000	4667300000	6534000000	3257700000	3276300000	2691400000	1300400000	1391000000
STE4	1	7	1	23.2	423	0.99217	1.413	1018400000	507530000	510890000	228000000	131960000	96033000	790420000	375570000	414850000
SNQ2	2	7	1	7.9	1501	N/A	1.4107	306170000	133440000	172730000	63091000	24307000	38784000	243080000	109130000	133950000
PAR32	1	3	1	14.2	295	1.1748	1.4092	698340000	318730000	379620000	620820000	278420000	342390000	77529000	40306000	37224000
SEC61	1	5	0	14.8	480	N/A	1.409	352060000	170550000	181510000	0	0	0	352060000	170550000	181510000
CST26	1	2	0	9.8	397	N/A	1.4084	108660000	61093000	47570000	0	0	0	108660000	61093000	47570000
ECM33	1	4	3	8.9	429	0.81912	1.4084	6174100000	3046600000	3127500000	1593800000	850280000	743480000	4580300000	2196300000	2384000000
USA1	1	4	1	6.4	838	N/A	1.4073	455140000	236440000	218690000	286680000	156370000	130310000	168460000	80079000	88383000
GTB1	1	15	0	29.8	702	N/A	1.4069	1990600000	941380000	1049200000	0	0	0	1990600000	941380000	1049200000
EFB1	1	10	8	53.9	206	0.97369	1.4064	3385200000	1833300000	1551900000	3175600000	1723900000	1451700000	209580000	109340000	100240000
TY2B-OR2;TY2B-DR1;TY2B-GR1;TY2B-OR1;TY2B-DR2;TY2B-C;TY2B-GR2;TY2B-F;TY2B-LR1;TY2B-B;TY2B-DR3;TY2A-DR3;TY2A-OR1;TY2A-DR1;TY2A-OR2;TY2A-DR2;TY2A-C;TY2A-GR2;TY2A-F;TY2A-LR2;TY2A-LR1;TY2A-GR1;TY2B-LR2	24	3	3	4.5	1770	1.3866	1.4063	943990000	402960000	541030000	815180000	335330000	479850000	128820000	67632000	61184000
GPD1	1	10	2	45	391	N/A	1.406	3255000000	1600400000	1654600000	292340000	117760000	174580000	2962600000	1482600000	1480000000
SCW10	1	6	1	23.7	389	1.3891	1.4023	2052200000	937460000	1114700000	910420000	416430000	493990000	1141800000	521030000	620760000
SCL1	1	10	3	55.6	252	1.2611	1.3997	1102700000	567540000	535140000	771720000	386480000	385230000	330960000	181060000	149900000
GET2	1	3	1	17.5	285	N/A	1.3996	229760000	132170000	97589000	42065000	25683000	16381000	187690000	106490000	81208000
AYR1	1	3	0	17.2	297	N/A	1.3981	955320000	484410000	470910000	0	0	0	955320000	484410000	470910000
NUP188	1	6	0	4.5	1655	N/A	1.3975	270860000	135710000	135150000	0	0	0	270860000	135710000	135150000
ARN1	1	1	0	1.8	627	N/A	1.3942	405020000	211960000	193070000	0	0	0	405020000	211960000	193070000
UTP18	1	4	2	12.5	594	0.80322	1.3927	441060000	249680000	191390000	348760000	204610000	144150000	92307000	45071000	47236000
MNN4	1	3	0	3	1178	N/A	1.3922	198740000	97187000	101550000	0	0	0	198740000	97187000	101550000
YHR045W	1	6	1	14.1	560	N/A	1.3908	426120000	207970000	218150000	82918000	45375000	37543000	343200000	162590000	180610000
SOP4	1	3	0	12.8	234	N/A	1.3908	618190000	344810000	273380000	0	0	0	618190000	344810000	273380000
NEO1	1	14	0	18.5	1151	N/A	1.3886	1196100000	613230000	582890000	0	0	0	1196100000	613230000	582890000
SEC20	1	2	0	6.8	383	N/A	1.3878	124240000	60736000	63500000	0	0	0	124240000	60736000	63500000
SUR1	1	2	0	8.4	382	N/A	1.3861	337660000	171210000	166450000	0	0	0	337660000	171210000	166450000
SIS2	1	3	1	10.3	562	N/A	1.3857	198480000	107290000	91184000	82662000	48967000	33695000	115810000	58325000	57490000
KHA1	1	3	1	5.4	873	N/A	1.3854	164530000	77032000	87494000	43131000	19795000	23336000	121390000	57237000	64157000
SED5	1	4	0	13.2	340	N/A	1.3843	475460000	261660000	213800000	0	0	0	475460000	261660000	213800000
YCP4	1	5	1	32.4	247	N/A	1.3841	1815600000	893000000	922610000	175410000	74170000	101240000	1640200000	818830000	821370000
TCB3	1	36	5	33.8	1545	0.9635	1.3834	4674600000	2201100000	2473500000	260630000	131190000	129450000	4414000000	2070000000	2344000000
PHO86	1	4	0	17	311	N/A	1.3815	259440000	129760000	129670000	0	0	0	259440000	129760000	129670000
HMG2	1	5	0	11.3	1045	N/A	1.381	489020000	244340000	244680000	0	0	0	489020000	244340000	244680000
SPB1	1	5	2	8.4	841	0.85576	1.3809	254210000	129700000	124510000	106550000	50312000	56237000	147660000	79384000	68274000
HLJ1	1	3	0	14.3	224	N/A	1.3809	747040000	356880000	390160000	0	0	0	747040000	356880000	390160000
EMC1	1	12	0	14.6	760	N/A	1.3797	2325500000	1191200000	1134400000	0	0	0	2325500000	1191200000	1134400000
DIP5	1	6	0	12	608	N/A	1.3794	1522000000	735660000	786370000	0	0	0	1522000000	735660000	786370000
TCB2	1	20	1	26.3	1178	N/A	1.3776	1834100000	877270000	956790000	123550000	54263000	69287000	1710500000	823010000	887500000
LCB2	1	8	2	20.3	561	1.074	1.376	3104100000	1360400000	1743700000	1299100000	626050000	673100000	1804900000	734310000	1070600000
SIT1	1	4	0	6.7	628	N/A	1.3743	452010000	218660000	233340000	0	0	0	452010000	218660000	233340000
DSL1	1	3	0	3.6	754	N/A	1.3742	50850000	26832000	24019000	0	0	0	50850000	26832000	24019000
VPS27	1	3	0	7.7	622	N/A	1.3716	181740000	83837000	97900000	0	0	0	181740000	83837000	97900000
YPR091C	1	10	3	21.4	770	0.73038	1.3709	1085200000	583360000	501810000	334220000	200630000	133590000	750960000	382730000	368230000
ALE1	1	5	1	9.9	619	N/A	1.3705	376210000	187970000	188240000	73346000	37596000	35749000	302870000	150380000	152490000
PMT2	1	7	1	20.8	759	N/A	1.3703	5795500000	2821200000	2974200000	106140000	36456000	69685000	5689300000	2784800000	2904600000
EXG1	1	3	0	13.4	448	N/A	1.3678	320870000	138880000	181980000	0	0	0	320870000	138880000	181980000
Uncharacterized oxidoreductase YNL181W	1	8	2	17.7	407	1.0428	1.3659	881780000	428230000	453560000	177900000	79511000	98386000	703890000	348720000	355170000
Uncharacterized oxidoreductase YMR226C	1	7	3	40.8	267	1.1689	1.3646	492970000	237270000	255700000	257130000	107290000	149840000	235850000	129990000	105860000
CDC42	1	5	0	36.1	191	N/A	1.363	7044500000	3512800000	3531800000	0	0	0	7044500000	3512800000	3531800000
GLE2	1	3	0	17.5	365	N/A	1.3623	417190000	219960000	197230000	0	0	0	417190000	219960000	197230000
UPF0674 endoplasmic reticulum membrane protein YNR021W	1	11	2	35.9	404	1.1445	1.3605	6223600000	3133400000	3090200000	323120000	160880000	162240000	5900400000	2972500000	2927900000
Uncharacterized protein YEL043W	1	7	1	11.4	956	N/A	1.3594	221770000	122360000	99409000	39520000	23960000	15560000	182250000	98401000	83849000
PGC1	1	4	0	15	321	N/A	1.3593	686420000	355540000	330880000	0	0	0	686420000	355540000	330880000
ELO3	1	4	1	16.5	345	0.9552	1.359	6959800000	3750300000	3209500000	4553600000	2541000000	2012500000	2406200000	1209300000	1197000000
ERG25	1	3	0	13.9	309	N/A	1.3581	391160000	194930000	196230000	0	0	0	391160000	194930000	196230000
ELO2	1	2	1	7.8	347	N/A	1.3561	1048200000	557270000	490920000	149020000	92977000	56039000	899170000	464300000	434880000
ROT2	1	12	0	19.6	954	N/A	1.3549	1496300000	789630000	706620000	0	0	0	1496300000	789630000	706620000
SVF1	1	5	2	15.6	481	0.97923	1.3547	612540000	321160000	291370000	133700000	68770000	64929000	478840000	252390000	226440000
GAP1	1	2	0	4.5	602	N/A	1.3541	99770000	44964000	54806000	0	0	0	99770000	44964000	54806000
STT3	1	4	0	4.9	718	N/A	1.3524	747330000	386530000	360800000	0	0	0	747330000	386530000	360800000
PIB2	1	17	0	40.6	635	N/A	1.3523	3394800000	1688400000	1706500000	0	0	0	3394800000	1688400000	1706500000
PTC7	1	3	0	13.1	343	N/A	1.3518	234720000	88040000	146680000	0	0	0	234720000	88040000	146680000
RET2	1	5	1	12.8	546	N/A	1.3518	531960000	300950000	231010000	0	0	0	531960000	300950000	231010000
KRE6	1	4	0	14.3	720	N/A	1.3512	1367700000	631800000	735880000	0	0	0	1367700000	631800000	735880000
NUP133	1	8	1	9.2	1157	N/A	1.3498	414870000	207590000	207280000	0	0	0	414870000	207590000	207280000
MCD4	1	3	0	5.4	919	N/A	1.3475	318920000	164890000	154040000	0	0	0	318920000	164890000	154040000
VPS5	1	6	1	10.7	675	N/A	1.346	485120000	244450000	240670000	32691000	15579000	17112000	452430000	228870000	223560000
ERG11	1	14	4	37	530	0.92945	1.3453	9037600000	4552100000	4485500000	1249400000	626500000	622860000	7788200000	3925600000	3862600000
ATG8	1	3	0	22.2	117	N/A	1.3452	262180000	148340000	113840000	0	0	0	262180000	148340000	113840000
ALG8	1	2	0	4.2	577	N/A	1.3446	78660000	36291000	42369000	0	0	0	78660000	36291000	42369000
OCH1	1	8	0	25.2	480	N/A	1.3424	504660000	262450000	242210000	0	0	0	504660000	262450000	242210000
SNL1	1	3	0	30.2	159	N/A	1.3424	291630000	137920000	153710000	0	0	0	291630000	137920000	153710000
SHR3	1	2	0	7.6	210	N/A	1.3424	939760000	478710000	461050000	0	0	0	939760000	478710000	461050000
Uncharacterized membrane protein YGR149W	1	2	0	7.4	432	N/A	1.3413	89188000	45020000	44168000	0	0	0	89188000	45020000	44168000
VAM7	1	2	0	3.8	316	N/A	1.3405	104710000	54211000	50499000	0	0	0	104710000	54211000	50499000
SCS2	1	14	7	74.2	244	0.99013	1.3402	30738000000	15272000000	15466000000	18640000000	9346800000	9293400000	12098000000	5925500000	6172500000
TSC13	1	4	0	12.9	310	N/A	1.3401	745640000	370440000	375210000	0	0	0	745640000	370440000	375210000
GAS5	1	4	2	15.5	484	1.068	1.3396	1376100000	673720000	702400000	230820000	115420000	115400000	1145300000	558290000	587000000
GPI16	1	2	0	5.6	610	N/A	1.3392	431250000	198630000	232610000	0	0	0	431250000	198630000	232610000
MAD1	1	5	1	10.7	749	N/A	1.3385	335030000	88599000	246430000	83424000	43542000	39882000	251600000	45058000	206540000
ATH1	1	2	0	2	1211	N/A	1.3374	91495000	44308000	47187000	0	0	0	91495000	44308000	47187000
Uncharacterized transporter YBR287W	1	1	0	4.2	427	N/A	1.336	21592000	11265000	10327000	0	0	0	21592000	11265000	10327000
PMT4	1	12	1	14	762	N/A	1.3316	938230000	460900000	477330000	0	0	0	938230000	460900000	477330000
KEX2	1	10	1	12.3	814	N/A	1.3313	801000000	407070000	393920000	0	0	0	801000000	407070000	393920000
ULP1	1	3	0	7.1	621	N/A	1.331	138060000	75454000	62603000	0	0	0	138060000	75454000	62603000
NCP1	1	19	2	46.3	691	0.97998	1.3296	5541600000	2537400000	3004200000	438910000	220870000	218030000	5102700000	2316500000	2786200000
LRO1	1	8	0	16.5	661	N/A	1.329	994760000	470460000	524290000	0	0	0	994760000	470460000	524290000
FET3	1	6	1	17.9	636	N/A	1.3265	1898300000	1000100000	898160000	48144000	23643000	24501000	1850100000	976460000	873660000
EMG1	1	4	4	21.4	252	0.92436	1.3256	844870000	450620000	394250000	755950000	404430000	351520000	88920000	46189000	42731000
SBH1	1	2	1	29.3	82	1.0038	1.3245	4832100000	2404300000	2427900000	3431100000	1709200000	1721900000	1401100000	695130000	705940000
SIM1	1	4	2	10.9	476	1.4195	1.3241	680380000	298430000	381940000	512640000	213670000	298970000	167730000	84760000	82974000
LAS21	1	2	0	2.3	830	N/A	1.3237	208350000	97940000	110410000	0	0	0	208350000	97940000	110410000
RNQ1	1	1	0	4.9	405	N/A	1.3229	111360000	57881000	53484000	0	0	0	111360000	57881000	53484000
TPS2	1	11	0	15.6	896	N/A	1.3213	634190000	340070000	294120000	0	0	0	634190000	340070000	294120000
TPS1	1	3	0	8.5	495	N/A	1.3207	394640000	181910000	212730000	0	0	0	394640000	181910000	212730000
RSC8	1	7	2	17.6	557	0.97424	1.3203	522550000	257790000	264770000	271620000	131260000	140360000	250940000	126530000	124410000
ERG3	1	7	2	20.3	365	0.87708	1.3195	2854900000	1474600000	1380400000	296930000	154170000	142760000	2558000000	1320400000	1237600000
SEC11	1	3	0	19.2	167	N/A	1.3167	132960000	72833000	60123000	0	0	0	132960000	72833000	60123000
SRC1	1	8	0	9.7	834	N/A	1.3154	606980000	303770000	303200000	0	0	0	606980000	303770000	303200000
FMP52	1	8	0	52.4	231	N/A	1.3151	1457200000	753610000	703560000	0	0	0	1457200000	753610000	703560000
YEH2	1	2	0	6.1	538	N/A	1.3143	36253000	16692000	19561000	0	0	0	36253000	16692000	19561000
MPS3	1	5	0	14.2	682	N/A	1.3137	154780000	84165000	70611000	0	0	0	154780000	84165000	70611000
UGA1	1	8	1	28	471	0.6298	1.3131	1231100000	669650000	561460000	646640000	370120000	276530000	584470000	299530000	284940000
PRC1	1	11	0	27.4	532	N/A	1.3112	7211500000	3572500000	3639000000	0	0	0	7211500000	3572500000	3639000000
PBP1	1	4	3	8.4	722	1.0291	1.3109	3227100000	1606200000	1620900000	3009000000	1487200000	1521800000	218090000	119020000	99074000
SUR2	1	8	0	20.3	349	N/A	1.3108	1191700000	612560000	579120000	0	0	0	1191700000	612560000	579120000
MLP2	1	10	0	7.3	1679	N/A	1.3108	192620000	86426000	106190000	0	0	0	192620000	86426000	106190000
NUP145	1	5	1	7.4	1317	N/A	1.3099	382340000	205950000	176390000	0	0	0	382340000	205950000	176390000
YDR415C	1	7	0	23.8	374	N/A	1.3097	1058500000	546650000	511860000	0	0	0	1058500000	546650000	511860000
SCJ1	1	6	1	23.1	377	N/A	1.3091	1528600000	728670000	799970000	41155000	21947000	19208000	1487500000	706720000	780760000
TLG1	1	3	1	18.8	224	N/A	1.3085	589030000	293380000	295650000	312630000	149750000	162880000	276400000	143620000	132780000
SVL3	1	4	0	5.7	825	N/A	1.3071	127380000	64707000	62672000	0	0	0	127380000	64707000	62672000
FAR8	1	2	0	6.5	523	N/A	1.3063	134590000	67663000	66926000	0	0	0	134590000	67663000	66926000
OYE2	1	9	1	44	400	1.5539	1.306	4754100000	2151700000	2602400000	1781500000	734730000	1046800000	2972500000	1417000000	1555600000
YGL082W	1	5	0	17.1	381	N/A	1.3048	730200000	365290000	364910000	0	0	0	730200000	365290000	364910000
VPS1	1	32	5	64.2	704	1.0358	1.3042	13718000000	6949200000	6768800000	485950000	230330000	255620000	13232000000	6718900000	6513100000
YSP2	1	5	1	4.9	1438	N/A	1.3042	134460000	69377000	65080000	54846000	28051000	26795000	79611000	41326000	38285000
GNT1	1	9	0	22.2	491	N/A	1.3042	768890000	404290000	364600000	0	0	0	768890000	404290000	364600000
HSP60	1	21	11	52.4	572	1.0639	1.3027	10420000000	4976300000	5444000000	7013700000	3259200000	3754500000	3406600000	1717100000	1689500000
LCP5	1	4	1	9.2	357	0.78412	1.3011	2565700000	1353100000	1212500000	2401900000	1305400000	1096500000	163720000	47712000	116010000
YGL140C	1	3	0	4.3	1219	N/A	1.2982	107170000	51473000	55700000	0	0	0	107170000	51473000	55700000
SCT1	1	7	0	10.1	759	N/A	1.2967	337440000	187110000	150340000	0	0	0	337440000	187110000	150340000
MUP1	1	7	0	15.5	574	N/A	1.2965	2145000000	1117800000	1027300000	0	0	0	2145000000	1117800000	1027300000
SSD1	1	9	2	10.9	1250	0.32085	1.2963	664530000	347470000	317060000	99996000	64727000	35269000	564530000	282740000	281790000
HTB2;HTB1	2	5	2	58	131	0.96517	1.2955	6109300000	2827300000	3282000000	443560000	212610000	230950000	5665800000	2614700000	3051100000
SSS1	1	2	1	36.2	80	N/A	1.2953	1239500000	655100000	584370000	512420000	267210000	245220000	727040000	387890000	339150000
ASK10	1	3	1	3.8	1146	0.63075	1.2953	207320000	118800000	88518000	129630000	73610000	56023000	77688000	45192000	32495000
MEX67	1	6	0	14.7	599	N/A	1.294	294600000	146310000	148290000	0	0	0	294600000	146310000	148290000
YHR202W	1	5	0	10.3	602	N/A	1.2912	442940000	223770000	219170000	0	0	0	442940000	223770000	219170000
HEH2	1	12	0	22.8	663	N/A	1.2896	2455700000	1339700000	1116000000	0	0	0	2455700000	1339700000	1116000000
URA1	1	1	0	3.5	314	N/A	1.2888	143100000	76859000	66238000	0	0	0	143100000	76859000	66238000
YIP3	1	4	0	32.4	176	N/A	1.2867	374840000	183690000	191150000	0	0	0	374840000	183690000	191150000
PEX30	1	5	2	18.5	523	N/A	1.2855	274040000	132230000	141800000	59818000	19419000	40399000	214220000	112810000	101400000
SEY1	1	12	3	17.4	776	1.3125	1.2834	2138100000	1064700000	1073400000	690910000	328900000	362010000	1447200000	735830000	711400000
CPR2	1	3	0	18	205	N/A	1.2828	72230000	35011000	37219000	0	0	0	72230000	35011000	37219000
VMA22	1	2	0	13.3	181	N/A	1.2818	146250000	75143000	71110000	0	0	0	146250000	75143000	71110000
RRS1	1	4	1	27.6	203	N/A	1.2811	945780000	481080000	464700000	185900000	98656000	87241000	759880000	382420000	377460000
SKI2	1	2	1	2.4	1287	N/A	1.2798	117570000	52159000	65412000	86655000	37276000	49379000	30916000	14883000	16033000
NUP57	1	10	0	22.6	541	N/A	1.2794	2232700000	1152300000	1080300000	0	0	0	2232700000	1152300000	1080300000
TPN1	1	5	1	14.5	579	N/A	1.278	1097400000	523700000	573660000	102980000	65286000	37695000	994380000	458410000	535960000
PST2	1	6	1	62.1	198	1.3003	1.2779	1146600000	535920000	610660000	600220000	265290000	334930000	546360000	270630000	275730000
NOT3	1	3	1	6	836	0.80698	1.2755	437450000	240720000	196740000	359440000	197960000	161480000	78013000	42754000	35259000
CYB5	1	3	1	21.7	120	N/A	1.2749	1397800000	724740000	673020000	495130000	267550000	227580000	902630000	457190000	445440000
IMH1	1	7	3	11.3	911	1.0511	1.2744	545440000	191120000	354320000	262840000	123430000	139410000	282600000	67687000	214910000
CDC10	1	5	0	24.2	322	N/A	1.2734	201290000	108040000	93252000	0	0	0	201290000	108040000	93252000
VPS35	1	6	0	9.2	944	N/A	1.2717	670420000	439430000	230990000	0	0	0	670420000	439430000	230990000
SHM1	1	9	4	26.5	490	0.85813	1.2712	1588700000	891980000	696720000	1036400000	597380000	438990000	552330000	294600000	257730000
POM152	1	34	5	37.8	1337	1.0696	1.2712	5307800000	2798400000	2509500000	405920000	219500000	186420000	4901900000	2578900000	2323100000
RVB2	1	6	3	16.8	471	1.3202	1.2705	5367900000	2627600000	2740300000	5069100000	2474000000	2595200000	298750000	153570000	145180000
NUP53	1	11	0	36.6	475	N/A	1.2701	2091300000	1020800000	1070500000	0	0	0	2091300000	1020800000	1070500000
SHS1	1	4	2	9.4	551	0.73115	1.2693	520800000	276910000	243890000	373470000	197740000	175730000	147330000	79175000	68157000
SEH1	1	4	1	11.5	349	N/A	1.2691	354590000	192850000	161740000	0	0	0	354590000	192850000	161740000
FIG1	1	2	0	5	298	N/A	1.2678	421960000	223990000	197980000	0	0	0	421960000	223990000	197980000
SEC1	1	4	0	7.2	724	N/A	1.2673	94700000	49013000	45687000	0	0	0	94700000	49013000	45687000
LST8	1	4	0	21.1	303	N/A	1.2673	732280000	377040000	355250000	0	0	0	732280000	377040000	355250000
BST1	1	3	0	4.5	1029	N/A	1.266	262820000	124100000	138720000	0	0	0	262820000	124100000	138720000
MDM38	1	4	3	10.8	573	1.01	1.2654	846610000	410360000	436250000	740500000	357650000	382850000	106110000	52711000	53399000
YPK1	1	5	1	9.6	680	1.8049	1.2649	1026000000	461850000	564120000	867160000	375780000	491390000	158810000	86077000	72734000
KEX1	1	11	1	21.8	729	0.90571	1.2641	1067900000	552880000	514990000	371170000	196130000	175040000	696700000	356750000	339950000
RTC5	1	10	0	24	567	N/A	1.2641	2425100000	1416400000	1008700000	0	0	0	2425100000	1416400000	1008700000
SKT5	1	6	0	9.8	696	N/A	1.2639	300470000	154290000	146180000	0	0	0	300470000	154290000	146180000
SSH1	1	3	0	14.1	490	N/A	1.2634	559330000	278970000	280360000	0	0	0	559330000	278970000	280360000
YPR063C	1	4	0	34.3	140	N/A	1.2621	362460000	181490000	180970000	0	0	0	362460000	181490000	180970000
PEP12	1	2	0	11.8	288	N/A	1.2593	100430000	54955000	45478000	0	0	0	100430000	54955000	45478000
SRP101	1	22	0	49.1	621	N/A	1.259	3204500000	1720600000	1483900000	0	0	0	3204500000	1720600000	1483900000
CPS1	1	17	2	40.6	576	1.269	1.258	34020000000	17658000000	16362000000	274210000	125170000	149050000	33745000000	17532000000	16213000000
COS5	1	0	0	27.2	383	N/A	1.2566	450180000	234900000	215280000	0	0	0	450180000	234900000	215280000
ECM14	1	5	0	13	430	N/A	1.2557	3539500000	1854700000	1684800000	0	0	0	3539500000	1854700000	1684800000
YLR225C	1	1	0	3.4	407	N/A	1.2548	196100000	92173000	103930000	0	0	0	196100000	92173000	103930000
KRE9	1	2	0	13.8	276	N/A	1.2547	1048600000	540530000	508070000	0	0	0	1048600000	540530000	508070000
LNP1	1	2	0	7.9	278	N/A	1.253	24452000	11469000	12982000	0	0	0	24452000	11469000	12982000
IDH2	1	4	1	24.7	369	1.1936	1.2525	201540000	101280000	100270000	54152000	25489000	28663000	147390000	75789000	71603000
AAP1	1	2	0	4.2	856	N/A	1.251	93392000	53317000	40075000	0	0	0	93392000	53317000	40075000
CRN1	1	18	3	41.9	651	0.93551	1.251	1883200000	1036200000	847040000	433470000	262330000	171140000	1449700000	773850000	675890000
SYP1	1	5	2	10.1	870	0.88489	1.2508	539630000	270890000	268740000	453300000	228430000	224870000	86334000	42458000	43876000
FAS1 domain-containing protein YDR262W	1	9	0	38.6	272	N/A	1.2506	597590000	329470000	268120000	0	0	0	597590000	329470000	268120000
RPT2	1	8	2	27.9	437	1.3128	1.2486	1962200000	888750000	1073500000	1419300000	602760000	816590000	542860000	285990000	256860000
CTR1	1	4	1	14.3	406	0.8876	1.2482	572980000	289220000	283760000	268420000	136310000	132120000	304560000	152920000	151650000
ERG5	1	16	2	42.8	538	4.7807	1.2473	3470800000	1416300000	2054500000	1054400000	194540000	859850000	2416400000	1221800000	1194600000
PRO3	1	9	5	44.1	286	1.187	1.247	2297600000	1324800000	972810000	1625900000	976720000	649220000	671660000	348070000	323590000
EMP24	1	2	0	16.7	203	N/A	1.2458	809630000	441120000	368510000	0	0	0	809630000	441120000	368510000
NUP120	1	1	0	1.2	1037	N/A	1.2453	73210000	34151000	39059000	0	0	0	73210000	34151000	39059000
OXR1	1	3	0	18.7	273	N/A	1.2453	196360000	99141000	97217000	0	0	0	196360000	99141000	97217000
POM34	1	5	0	19.7	299	N/A	1.2446	610780000	307380000	303400000	0	0	0	610780000	307380000	303400000
NSP1	1	9	3	18.2	823	1.0427	1.2439	2633800000	1267100000	1366700000	1913900000	899370000	1014500000	719970000	367740000	352220000
SLA1	1	6	2	8.2	1244	1.0625	1.2438	304520000	143740000	160780000	202170000	90332000	111840000	102350000	53406000	48944000
TOR2	1	4	0	2.7	2474	N/A	1.2431	148840000	69564000	79274000	0	0	0	148840000	69564000	79274000
Uncharacterized vacuolar membrane protein YNL115C	1	11	0	24.1	644	N/A	1.2424	2829500000	1519600000	1309900000	0	0	0	2829500000	1519600000	1309900000
IMD2;IMD1	3	4	3	27.5	523	N/A	1.242	538460000	191640000	346820000	0	0	0	538460000	191640000	346820000
YPT6	1	5	0	23.3	215	N/A	1.2415	500350000	258620000	241740000	0	0	0	500350000	258620000	241740000
CDC48	1	21	6	41.2	835	1.2353	1.2407	16360000000	7757300000	8602600000	11064000000	4986000000	6078200000	5295800000	2771400000	2524400000
NUP157	1	20	3	26.5	1391	0.96907	1.2407	2126200000	1096300000	1029800000	405960000	224660000	181310000	1720200000	871660000	848530000
UTP21	1	3	0	5.4	939	N/A	1.2404	230110000	127230000	102880000	0	0	0	230110000	127230000	102880000
DCR2	1	2	0	5.7	578	N/A	1.2402	394600000	207950000	186650000	0	0	0	394600000	207950000	186650000
ARO10	1	10	1	21.6	635	1.4486	1.2387	825470000	429660000	395810000	340670000	173910000	166770000	484800000	255760000	229040000
AIM6	1	8	1	31.3	390	N/A	1.2374	653440000	339230000	314210000	57684000	22375000	35308000	595750000	316850000	278900000
RAS1	1	2	1	13.3	309	N/A	1.2373	364530000	204000000	160520000	139030000	86626000	52399000	225500000	117380000	108120000
NIC96	1	18	1	26.8	839	1.3226	1.237	2556300000	1255500000	1300800000	203300000	93655000	109640000	2353000000	1161900000	1191200000
YPT10	1	4	0	21.6	199	N/A	1.237	710800000	360520000	350280000	0	0	0	710800000	360520000	350280000
LAG1	1	2	0	7.3	411	N/A	1.2369	133860000	73160000	60700000	0	0	0	133860000	73160000	60700000
AST1	1	2	0	5.6	429	N/A	1.2368	128580000	65122000	63455000	0	0	0	128580000	65122000	63455000
RCL1	1	2	0	7.1	367	N/A	1.2368	84835000	37035000	47800000	0	0	0	84835000	37035000	47800000
BUL1	1	2	0	2.5	976	N/A	1.2361	37102000	18162000	18940000	0	0	0	37102000	18162000	18940000
GBP2	1	4	0	17.6	427	N/A	1.2359	159080000	82483000	76595000	0	0	0	159080000	82483000	76595000
MNN5	1	16	0	40.3	586	N/A	1.2356	4927400000	2581600000	2345700000	0	0	0	4927400000	2581600000	2345700000
LAP3	1	6	1	18.8	483	1.1754	1.2336	1988900000	987230000	1001700000	654470000	307030000	347440000	1334400000	680210000	654230000
PRP43	1	4	0	5.7	767	N/A	1.2334	290550000	142960000	147590000	0	0	0	290550000	142960000	147590000
ACC1	2	52	14	29.7	2233	1.223	1.2326	26372000000	13457000000	12915000000	10710000000	5165500000	5544900000	15661000000	8291700000	7369600000
NUP159	1	11	5	10.1	1460	1.014	1.2321	2167100000	1040800000	1126200000	1205600000	535480000	670090000	961500000	505360000	456140000
NADPH-dependent alpha-keto amide reductase	1	5	3	24.4	312	2.1819	1.2294	475870000	165490000	310380000	349910000	106370000	243540000	125960000	59118000	66839000
IFA38	1	2	0	12.7	347	N/A	1.2282	147900000	76554000	71346000	0	0	0	147900000	76554000	71346000
POB3	1	3	1	6.7	552	N/A	1.227	455260000	213430000	241820000	280050000	125930000	154120000	175210000	87502000	87706000
TCO89	1	15	0	25	799	N/A	1.2263	3765400000	1719700000	2045700000	0	0	0	3765400000	1719700000	2045700000
BZZ1	1	5	0	10	633	N/A	1.2229	494250000	251970000	242280000	0	0	0	494250000	251970000	242280000
FAS1	1	59	15	44.8	2051	1.1533	1.2212	27097000000	13636000000	13462000000	8301800000	3843200000	4458600000	18795000000	9792500000	9003000000
PPZ1	1	6	3	14.9	692	0.54517	1.2207	488110000	297340000	190770000	249160000	171760000	77401000	238940000	125580000	113370000
RPF1	1	2	0	10.2	295	N/A	1.2203	107530000	60549000	46986000	0	0	0	107530000	60549000	46986000
AIF1	1	5	0	18	378	N/A	1.2194	259330000	139700000	119630000	0	0	0	259330000	139700000	119630000
FAS2	1	69	26	51.7	1887	1.1785	1.2179	49176000000	24563000000	24612000000	22192000000	10295000000	11897000000	26984000000	14269000000	12715000000
RTG2	1	6	2	14.1	588	N/A	1.2169	2202500000	1296200000	906300000	176110000	86108000	90003000	2026400000	1210100000	816300000
GCN1	1	8	2	3.5	2672	1.6061	1.2139	733300000	327110000	406190000	313390000	106990000	206400000	419910000	220120000	199790000
MON2	1	20	0	20	1636	N/A	1.2138	1861300000	961520000	899740000	0	0	0	1861300000	961520000	899740000
TRE2	1	12	0	19.2	809	N/A	1.2134	1459000000	754770000	704190000	0	0	0	1459000000	754770000	704190000
CCC2	1	4	0	7.4	1004	N/A	1.2132	242960000	121960000	121000000	0	0	0	242960000	121960000	121000000
XRN1	1	16	2	14.5	1528	0.8883	1.2126	622670000	334030000	288640000	95389000	45559000	49830000	527290000	288470000	238810000
EPS1	1	16	0	31.1	701	N/A	1.212	1225600000	629830000	595720000	0	0	0	1225600000	629830000	595720000
NUP170	1	18	2	16	1502	1.3406	1.2117	973220000	480640000	492580000	79228000	32052000	47176000	893990000	448590000	445400000
TRP3	1	12	4	35.7	484	1.0344	1.2115	1927500000	1176100000	751460000	1183400000	622110000	561290000	744130000	553950000	190170000
TOR1	1	32	0	20.1	2470	N/A	1.2114	5148600000	2672600000	2476000000	0	0	0	5148600000	2672600000	2476000000
DOP1	1	18	0	13	1698	N/A	1.2114	1007600000	501400000	506170000	0	0	0	1007600000	501400000	506170000
ERG27	1	9	0	31.1	347	N/A	1.211	3775200000	1972900000	1802300000	0	0	0	3775200000	1972900000	1802300000
COS3;COS2	4	3	0	23	379	N/A	1.2101	1400500000	791110000	609390000	0	0	0	1400500000	791110000	609390000
ITR1	1	10	2	23.6	584	1.151	1.21	14129000000	7342500000	6786300000	297260000	140770000	156490000	13832000000	7201700000	6629800000
BAT1	1	7	2	32.1	393	N/A	1.2098	415040000	228680000	186360000	128440000	82165000	46279000	286600000	146520000	140080000
EFG1	1	4	2	27	233	N/A	1.2098	418150000	227350000	190800000	359880000	196660000	163230000	58268000	30689000	27579000
CDC12	1	10	1	34.9	407	0.91518	1.2097	1545600000	818780000	726850000	702010000	369500000	332510000	843610000	449270000	394340000
UBP1	1	8	3	14.8	809	0.88897	1.2075	470730000	242310000	228420000	169020000	87895000	81127000	301710000	154420000	147290000
LAT1	1	10	3	25.7	482	0.26207	1.2069	2093900000	1627700000	466250000	1272100000	1214200000	57860000	821840000	413460000	408390000
CTR2	1	1	0	8.5	189	N/A	1.2066	501540000	268480000	233070000	0	0	0	501540000	268480000	233070000
TFG2	1	2	1	8.5	400	1.0819	1.2064	1136900000	533150000	603790000	1087200000	512970000	574190000	49782000	20181000	29601000
PNC1	1	3	1	19	216	N/A	1.2058	461560000	240730000	220830000	162230000	80953000	81273000	299340000	159780000	139560000
IST2	1	10	4	16.1	946	1.2362	1.2033	2133500000	1029200000	1104300000	961780000	392300000	569480000	1171700000	636910000	534810000
GET1	1	4	3	20.4	235	1.0119	1.2026	1101400000	493910000	607500000	977470000	434010000	543460000	123930000	59902000	64032000
YPT1	1	7	2	37.9	206	1.0636	1.199	4122500000	2121900000	2000600000	642350000	327300000	315050000	3480100000	1794600000	1685500000
HTA2;HTA1	2	2	0	32.6	132	N/A	1.1988	1273900000	740990000	532950000	0	0	0	1273900000	740990000	532950000
RHO5	1	9	0	30.8	331	N/A	1.1986	964300000	515330000	448970000	0	0	0	964300000	515330000	448970000
YFR006W	1	6	1	16.8	535	0.68532	1.1971	1060500000	582340000	478160000	490220000	263690000	226540000	570270000	318650000	251620000
KIN1	1	3	1	5.1	1064	1.1745	1.197	246810000	122380000	124430000	177160000	85941000	91215000	69655000	36436000	33219000
GPA1	1	7	0	21.4	472	N/A	1.1959	875040000	449080000	425960000	0	0	0	875040000	449080000	425960000
RPN2	1	18	5	23.6	945	1.1566	1.1957	2177700000	1197100000	980560000	313710000	157650000	156060000	1864000000	1039500000	824500000
GAS3	1	9	4	24.6	524	1.3359	1.1942	2256000000	1116800000	1139300000	759950000	316290000	443660000	1496100000	800460000	695620000
Uncharacterized protein YMR160W	1	16	0	35.7	816	N/A	1.1941	2268700000	1305700000	963030000	0	0	0	2268700000	1305700000	963030000
NUS1	1	5	1	20	375	2.3979	1.1933	1689700000	837120000	852570000	254650000	75753000	178900000	1435000000	761370000	673670000
RAS2	1	12	4	63.4	322	1.1614	1.1922	3490600000	1703200000	1787400000	798620000	282430000	516180000	2692000000	1420800000	1271200000
UGP1	1	16	5	44.3	499	1.1062	1.1922	3409600000	1749100000	1660500000	879500000	422340000	457150000	2530100000	1326800000	1203400000
FRE1	1	3	0	4.5	686	N/A	1.1914	258620000	126280000	132340000	0	0	0	258620000	126280000	132340000
VPS30	1	12	0	29.8	557	N/A	1.191	960360000	509390000	450970000	0	0	0	960360000	509390000	450970000
YJU3	1	9	1	45.4	313	N/A	1.1907	3892500000	2108900000	1783600000	53758000	21575000	32183000	3838700000	2087300000	1751400000
CEG1	1	4	0	14.8	459	N/A	1.1906	79655000	43850000	35805000	0	0	0	79655000	43850000	35805000
RPN8	2	6	1	21.6	338	N/A	1.1902	383990000	209010000	174970000	73422000	39393000	34029000	310570000	169620000	140940000
RSR1	1	4	0	17.3	272	N/A	1.1898	872200000	457350000	414850000	0	0	0	872200000	457350000	414850000
NAB3	1	2	0	2.7	802	N/A	1.1882	115400000	61161000	54236000	0	0	0	115400000	61161000	54236000
PGA3	1	4	1	15.4	312	0.93853	1.1873	1133100000	637960000	495130000	440940000	237850000	203090000	692150000	400110000	292040000
NUP192	1	12	1	8.1	1683	N/A	1.186	313160000	159480000	153670000	0	0	0	313160000	159480000	153670000
YPT31	1	7	2	58.7	223	0.87504	1.1845	2433900000	1243900000	1190000000	353960000	175130000	178830000	2079900000	1068800000	1011200000
KOG1	1	30	0	27.5	1557	N/A	1.1818	4831500000	2489100000	2342400000	0	0	0	4831500000	2489100000	2342400000
NMT1	1	2	0	4.2	455	N/A	1.1809	57584000	30644000	26939000	0	0	0	57584000	30644000	26939000
LYP1	1	5	0	10.6	611	N/A	1.1807	2666100000	1421500000	1244600000	0	0	0	2666100000	1421500000	1244600000
HSP104	1	21	2	38.8	908	N/A	1.18	2554200000	1412000000	1142200000	0	0	0	2554200000	1412000000	1142200000
MTC1	1	5	0	13.2	478	N/A	1.1795	210800000	91133000	119670000	0	0	0	210800000	91133000	119670000
NVJ1	1	8	0	40.2	321	N/A	1.1791	621930000	334250000	287680000	0	0	0	621930000	334250000	287680000
SMC1	1	3	1	3.2	1225	N/A	1.1784	1538500000	869130000	669400000	1491700000	846520000	645230000	46778000	22609000	24170000
VPS13	1	34	1	16	3144	1.1007	1.1784	2099900000	1092700000	1007200000	441550000	202900000	238640000	1658300000	889780000	768530000
PRE2	1	2	0	8	287	N/A	1.1777	193590000	101790000	91800000	0	0	0	193590000	101790000	91800000
GLK1	2	6	3	14	500	1.3738	1.1758	750540000	364680000	385860000	271340000	109960000	161380000	479200000	254720000	224480000
SEC18	1	18	2	30.9	758	1.2692	1.1755	3613800000	1870800000	1743100000	734980000	320550000	414430000	2878900000	1550200000	1328600000
ALO1	1	4	2	10.1	526	0.76043	1.1755	279840000	173510000	106320000	194680000	121510000	73170000	85157000	52002000	33154000
NPL4	1	3	1	4.8	580	N/A	1.174	266870000	149800000	117070000	120530000	67737000	52789000	146340000	82061000	64281000
PUP2	1	5	3	22.3	260	1.1471	1.1737	562640000	453670000	108970000	132930000	64112000	68815000	429720000	389560000	40154000
SUB1	1	2	1	9.6	292	1.2434	1.1724	1407300000	639050000	768270000	1343400000	608210000	735160000	63955000	30841000	33115000
SEC4	1	9	2	55.8	215	1.2244	1.172	7632900000	4104200000	3528700000	215990000	95321000	120670000	7416900000	4008900000	3408100000
FCY2	1	9	1	15.4	533	0.73973	1.1715	6668100000	3472700000	3195400000	850080000	387470000	462610000	5818000000	3085200000	2732800000
ALR1	1	4	1	7.3	859	N/A	1.1715	169120000	87785000	81330000	42209000	20971000	21237000	126910000	66814000	60093000
VAC8	1	17	1	48.6	578	N/A	1.1714	23275000000	12808000000	10467000000	69892000	34326000	35566000	23205000000	12774000000	10431000000
NUP116	1	13	1	15.9	1113	N/A	1.1713	1240600000	780090000	460540000	103270000	52509000	50766000	1137400000	727580000	409770000
MNN2	1	19	5	49.2	597	1.0603	1.1711	6070800000	3164900000	2905900000	726640000	378170000	348470000	5344200000	2786700000	2557400000
RPL37B	1	2	0	65.9	88	N/A	1.1704	178730000	98821000	79906000	0	0	0	178730000	98821000	79906000
KIN4	1	2	0	3.4	800	N/A	1.1699	39641000	21129000	18512000	0	0	0	39641000	21129000	18512000
ENT4	1	3	0	13	247	N/A	1.1691	165200000	82115000	83080000	0	0	0	165200000	82115000	83080000
ARP5	1	6	1	11.7	755	N/A	1.1675	237560000	155740000	81821000	126390000	97897000	28496000	111170000	57845000	53325000
PRD1	1	9	3	16.2	712	1.1054	1.1669	1688900000	1443100000	245860000	1450200000	1310700000	139490000	238750000	132380000	106380000
TSA1	1	2	2	11.7	196	1.1915	1.1661	1660500000	775790000	884710000	1392000000	636450000	755530000	268520000	139340000	129180000
MYO2	1	5	2	4.1	1574	0.88569	1.1656	355290000	185380000	169910000	101340000	53840000	47497000	253960000	131540000	122410000
HSP82	2	5	19	53.5	709	1.3259	1.165	3084300000	1553000000	1531300000	1797000000	860310000	936680000	1287300000	692700000	594600000
MKT1	1	3	1	4.9	830	1.0274	1.1638	2444500000	1237900000	1206600000	2206300000	1102500000	1103700000	238210000	135330000	102880000
Uncharacterized protein YMR147W	1	6	1	47.5	223	N/A	1.1637	994110000	556970000	437140000	120120000	71994000	48131000	873990000	484970000	389010000
PAN1	2	12	4	14.7	1480	0.9839	1.1628	787310000	426480000	360830000	508760000	243890000	264860000	278550000	182580000	95968000
FAA4	1	19	1	44.4	694	0.88	1.1614	24255000000	17925000000	6330000000	634400000	333720000	300670000	23621000000	17591000000	6029300000
ALD6	1	26	12	67	500	1.3405	1.1605	33710000000	17336000000	16373000000	7458600000	3153000000	4305700000	26251000000	14183000000	12068000000
CDC3	1	11	4	26.3	520	0.99213	1.1577	2184400000	1021300000	1163100000	1422900000	637770000	785090000	761520000	383500000	378020000
PCS60	1	10	1	22.8	543	N/A	1.1561	2410300000	1573400000	836930000	488890000	472870000	16016000	1921500000	1100600000	820910000
YPT7	1	5	0	34.1	208	N/A	1.1559	11181000000	6047100000	5133500000	0	0	0	11181000000	6047100000	5133500000
MNN11	1	7	2	24.4	422	N/A	1.155	503370000	234080000	269290000	15162000	0	15162000	488210000	234080000	254130000
TRM8	1	3	1	13.3	286	0.76105	1.1542	654560000	366220000	288350000	568160000	317630000	250530000	86407000	48585000	37822000
LPD1	1	12	7	28.7	499	1.1858	1.1528	1035000000	607090000	427860000	650730000	393800000	256930000	384220000	213290000	170930000
ARG4	1	4	0	11.4	463	N/A	1.1516	148700000	82414000	66288000	0	0	0	148700000	82414000	66288000
ENO1	1	10	10	76	437	1.4475	1.1498	8756300000	4610900000	4145400000	581010000	234330000	346680000	8175300000	4376500000	3798800000
ASM4	1	8	0	21.4	528	N/A	1.1496	483250000	255010000	228240000	0	0	0	483250000	255010000	228240000
HXT2	1	4	2	14.8	541	1.3657	1.1495	3619200000	1765500000	1853800000	2250200000	1142400000	1107900000	1369000000	623130000	745890000
GLR1	1	14	2	47.2	483	1.1804	1.1492	2433300000	1309300000	1124100000	683580000	359470000	324110000	1749800000	949790000	799970000
RPT6	1	8	2	23.7	405	1.2866	1.1491	902890000	468060000	434820000	194330000	93126000	101200000	708560000	374940000	333620000
UBP3	1	9	2	12.7	912	0.99253	1.1488	819200000	399070000	420130000	497570000	239080000	258490000	321630000	159990000	161650000
SLC1	1	12	0	38.9	303	N/A	1.1485	4571800000	2482700000	2089200000	0	0	0	4571800000	2482700000	2089200000
VPS15	1	11	0	10.3	1454	N/A	1.148	1102100000	583370000	518720000	0	0	0	1102100000	583370000	518720000
NOC3	1	3	0	6.6	663	N/A	1.1478	156950000	86378000	70572000	0	0	0	156950000	86378000	70572000
HCR1	1	4	0	19.2	265	N/A	1.1476	462100000	167980000	294120000	0	0	0	462100000	167980000	294120000
AIP1	1	3	1	9.6	615	N/A	1.147	129530000	75338000	54187000	56389000	36474000	19915000	73136000	38864000	34272000
SCS7	1	5	0	14.1	384	N/A	1.1468	300970000	170560000	130400000	0	0	0	300970000	170560000	130400000
ARP3	1	5	2	22	449	1.1643	1.1463	1322100000	646240000	675900000	968230000	431410000	536820000	353910000	214830000	139080000
NUP100	1	10	1	19.6	959	N/A	1.1457	609370000	278140000	331220000	83077000	12538000	70538000	526290000	265610000	260680000
BFR1	1	23	10	53.6	470	1.1469	1.1441	5422200000	2831300000	2590900000	628040000	299590000	328450000	4794200000	2531700000	2262400000
TGL1	1	7	0	18.4	548	N/A	1.1436	762250000	355430000	406820000	0	0	0	762250000	355430000	406820000
PTC4	1	3	0	15.3	393	N/A	1.1433	117700000	66699000	51003000	0	0	0	117700000	66699000	51003000
YDJ1	1	15	5	38.6	409	1.0669	1.142	7153100000	3781900000	3371200000	3779200000	1941200000	1838000000	3373800000	1840700000	1533200000
NPP1	1	4	0	6.9	742	N/A	1.1419	426780000	284310000	142460000	0	0	0	426780000	284310000	142460000
REI1	1	2	0	6.9	393	N/A	1.1418	65132000	34988000	30144000	0	0	0	65132000	34988000	30144000
STI1	1	35	16	70.3	589	1.1596	1.1416	11808000000	5957200000	5851200000	5506300000	2531000000	2975400000	6302100000	3426300000	2875800000
Putative metallophosphoesterase YNL217W	1	14	0	46	326	N/A	1.1415	7760200000	4220900000	3539300000	0	0	0	7760200000	4220900000	3539300000
RSC4	1	3	0	8	625	N/A	1.141	57088000	27157000	29931000	0	0	0	57088000	27157000	29931000
WSC2	1	2	0	8.3	503	N/A	1.1406	136960000	69879000	67077000	0	0	0	136960000	69879000	67077000
GCD6	1	4	0	8.6	712	N/A	1.1401	310530000	170870000	139660000	0	0	0	310530000	170870000	139660000
NUP49	1	3	0	8.9	472	N/A	1.1395	171210000	96192000	75022000	0	0	0	171210000	96192000	75022000
PRM1	1	2	0	3	661	N/A	1.1388	220960000	118290000	102670000	0	0	0	220960000	118290000	102670000
CDC11	1	3	0	9.9	415	N/A	1.1368	287650000	158550000	129100000	0	0	0	287650000	158550000	129100000
PIL1	1	8	1	49.9	339	N/A	1.1367	3298600000	1771000000	1527600000	89207000	37329000	51878000	3209400000	1733700000	1475700000
ERP1	1	5	0	25.6	219	N/A	1.1358	1362800000	745340000	617480000	0	0	0	1362800000	745340000	617480000
CBK1	1	2	0	3	756	N/A	1.1342	56181000	31183000	24998000	0	0	0	56181000	31183000	24998000
RHO4	1	4	0	24.7	291	N/A	1.134	376380000	183230000	193150000	0	0	0	376380000	183230000	193150000
HOM3	1	7	1	26.2	527	1.1553	1.1339	726660000	378080000	348580000	329830000	174400000	155420000	396830000	203680000	193150000
ERG7	1	14	0	27.4	731	N/A	1.1337	2953900000	1652800000	1301100000	0	0	0	2953900000	1652800000	1301100000
SEC13	1	6	1	22.6	297	N/A	1.1331	938930000	493010000	445920000	41002000	21596000	19407000	897930000	471410000	426510000
PRE9	1	2	0	12.8	258	N/A	1.1323	267610000	148790000	118820000	0	0	0	267610000	148790000	118820000
GRX4	1	4	1	22.5	244	N/A	1.1323	72044000	39872000	32172000	0	0	0	72044000	39872000	32172000
ZWF1	1	8	2	23.4	505	1.3907	1.1322	1139900000	553140000	586760000	427530000	182020000	245510000	712370000	371120000	341250000
RFC3	1	3	0	15.6	340	N/A	1.1321	113400000	57987000	55417000	0	0	0	113400000	57987000	55417000
RTC1	1	3	0	2.2	1341	N/A	1.1313	56023000	28124000	27899000	0	0	0	56023000	28124000	27899000
SRV2	1	12	2	41.6	526	1.294	1.1308	3930000000	1777400000	2152600000	2553300000	1022600000	1530700000	1376700000	754780000	621970000
EIS1	1	4	1	6.5	843	N/A	1.1304	77111000	43505000	33606000	8599700	3284100	5315600	68511000	40220000	28291000
NUP2	1	10	6	23.2	720	0.87306	1.1302	1537500000	782170000	755300000	1194100000	625700000	568390000	343390000	156470000	186920000
Uncharacterized transporter YDR338C	1	3	0	3.7	695	N/A	1.1289	503210000	303640000	199570000	0	0	0	503210000	303640000	199570000
VPS34	1	14	2	25.1	875	1.0692	1.1284	1585000000	828260000	756720000	158190000	66197000	91994000	1426800000	762060000	664730000
BOS1	1	2	0	9.4	244	N/A	1.1282	74708000	37786000	36922000	0	0	0	74708000	37786000	36922000
ARC35	1	3	0	12.9	342	N/A	1.128	283390000	161190000	122200000	0	0	0	283390000	161190000	122200000
VPS21	1	7	2	31.4	210	1.0806	1.1273	2574200000	1406900000	1167300000	1016100000	490850000	525280000	1558100000	916030000	642030000
RHO3	1	2	0	10.4	231	N/A	1.127	196720000	98283000	98436000	0	0	0	196720000	98283000	98436000
RVB1	1	6	2	19.4	463	1.0116	1.1268	2021400000	1047100000	974310000	1459500000	738850000	720660000	561910000	308260000	253650000
MET13	1	3	0	6.8	600	N/A	1.1267	101890000	54568000	47321000	0	0	0	101890000	54568000	47321000
NUP82	1	6	0	14	713	N/A	1.1263	615220000	312640000	302580000	0	0	0	615220000	312640000	302580000
PWP1	1	8	4	23.8	576	1.0436	1.1251	3150600000	1508000000	1642600000	2914300000	1377700000	1536600000	236370000	130320000	106060000
CDC50	1	6	1	14.6	391	N/A	1.1227	436680000	185640000	251040000	168180000	40772000	127410000	268500000	144870000	123630000
LYS21	1	2	1	24.1	440	1.0277	1.1214	1890300000	1019700000	870610000	1467900000	779680000	688200000	422420000	240010000	182410000
FPS1	1	3	0	10	669	N/A	1.1209	247110000	152620000	94486000	0	0	0	247110000	152620000	94486000
RAV1	1	18	0	20.6	1357	N/A	1.1205	1276700000	702040000	574640000	0	0	0	1276700000	702040000	574640000
BAP3	1	3	0	8.3	604	N/A	1.1197	524110000	276200000	247900000	0	0	0	524110000	276200000	247900000
NUP60	1	8	2	24.1	539	1.1499	1.1195	1157300000	557280000	600050000	727000000	341260000	385740000	430330000	216020000	214310000
GVP36	1	7	4	38	326	1.147	1.1186	2636200000	1249200000	1386900000	2314800000	1070500000	1244300000	321330000	178740000	142600000
STE2	1	4	0	17.4	431	N/A	1.1184	245290000	134610000	110680000	0	0	0	245290000	134610000	110680000
THI7;NRT1;THI72	3	2	0	4.5	598	N/A	1.1181	111970000	53858000	58111000	0	0	0	111970000	53858000	58111000
SSB1	1	1	11	61.7	613	N/A	1.118	1144400000	689480000	454920000	0	0	0	1144400000	689480000	454920000
PDA1	1	3	1	11	420	0.92374	1.1179	2948000000	1479100000	1468900000	2817500000	1405100000	1412400000	130440000	73929000	56515000
HYR1	1	4	1	25.8	163	N/A	1.1179	278960000	146270000	132690000	54338000	30256000	24082000	224630000	116020000	108610000
ARG1	1	6	3	18.6	420	N/A	1.1178	338800000	189050000	149750000	64640000	25893000	38747000	274160000	163160000	111000000
OSH2	1	5	0	5.3	1283	N/A	1.1173	225770000	125250000	100520000	0	0	0	225770000	125250000	100520000
SPT16	1	11	2	18.4	1035	N/A	1.1171	803240000	439140000	364100000	165590000	93215000	72373000	637650000	345920000	291730000
YOP1	1	3	1	22.2	180	0.92104	1.1158	860260000	434870000	425390000	273340000	113850000	159490000	586920000	321020000	265900000
SLA2	1	6	2	7.5	968	1.2661	1.1154	340100000	172610000	167490000	173360000	78408000	94951000	166740000	94206000	72537000
OPI1	1	5	0	18.3	404	N/A	1.1152	391100000	215220000	175880000	0	0	0	391100000	215220000	175880000
KAP95	1	5	1	9.9	861	1.0535	1.1151	1478200000	753630000	724600000	1011500000	498990000	512490000	466760000	254650000	212110000
ADE3	1	23	4	38.4	946	1.1118	1.1149	7436100000	3949000000	3487100000	2263900000	1077400000	1186400000	5172200000	2871600000	2300700000
LSB3	1	2	0	10.2	459	N/A	1.1143	186730000	97700000	89027000	0	0	0	186730000	97700000	89027000
EHT1	1	14	2	47.9	451	1.1341	1.1125	6016800000	3180800000	2836000000	947370000	464250000	483120000	5069400000	2716500000	2352900000
LSP1	1	10	1	48.7	341	N/A	1.1103	1650100000	874260000	775800000	340630000	162850000	177780000	1309400000	711410000	598020000
ACO1	1	13	2	24	778	N/A	1.11	2205500000	1222600000	982880000	202890000	119580000	83306000	2002600000	1103100000	899570000
SEC31	1	24	9	29.7	1273	0.99934	1.1097	7385300000	3722800000	3662500000	4948500000	2449600000	2498900000	2436900000	1273200000	1163600000
EAR1	1	4	0	8.5	550	N/A	1.1096	963860000	536050000	427810000	0	0	0	963860000	536050000	427810000
NAB2	1	6	3	21.5	525	0.91078	1.1089	749330000	382460000	366880000	504690000	252920000	251770000	244640000	129530000	115110000
RAV2	1	7	0	29.9	351	N/A	1.1081	489860000	265370000	224490000	0	0	0	489860000	265370000	224490000
ATF1	1	2	0	4.6	525	N/A	1.1075	75735000	38451000	37284000	0	0	0	75735000	38451000	37284000
SSE1	1	29	9	50.4	693	1.1007	1.1072	24843000000	13292000000	11551000000	4093700000	1853500000	2240200000	20749000000	11438000000	9310700000
TRM1	1	15	2	39.6	570	0.91366	1.1067	3642800000	2025000000	1617700000	614450000	326540000	287900000	3028300000	1698500000	1329800000
NRD1	1	3	0	9	575	N/A	1.1064	582030000	74281000	507750000	0	0	0	582030000	74281000	507750000
SSH4	1	6	0	16.1	579	N/A	1.1057	695420000	377370000	318050000	0	0	0	695420000	377370000	318050000
RSP5	1	5	0	10.6	809	N/A	1.1055	1583800000	883350000	700490000	0	0	0	1583800000	883350000	700490000
TUB2	1	2	0	5.5	457	N/A	1.1047	110380000	62817000	47564000	0	0	0	110380000	62817000	47564000
TUL1	1	4	0	7.1	758	N/A	1.1035	913310000	482810000	430500000	0	0	0	913310000	482810000	430500000
PRE5	1	7	2	55.6	234	0.78668	1.1028	866980000	510080000	356900000	630530000	370870000	259660000	236450000	139210000	97241000
RTN1	1	13	6	56.9	295	0.90546	1.1022	14632000000	7924200000	6707400000	7238900000	3823800000	3415200000	7392600000	4100400000	3292200000
RPB2	1	11	1	17.2	1224	N/A	1.1016	1305700000	687800000	617900000	265460000	137120000	128340000	1040200000	550680000	489560000
UBP6	1	11	2	36.1	499	1.2036	1.1014	543920000	275400000	268510000	191730000	86802000	104930000	352190000	188600000	163590000
TPS3	1	3	1	4.9	1054	N/A	1.1009	610840000	274320000	336520000	530600000	229970000	300640000	80232000	44347000	35885000
RFC1	1	4	2	6.3	861	1.1227	1.1008	348800000	175270000	173530000	286670000	137100000	149570000	62128000	38166000	23963000
TRE1	1	6	0	13.4	783	N/A	1.1003	342970000	202230000	140730000	0	0	0	342970000	202230000	140730000
MNR2	1	15	0	25.7	969	N/A	1.0996	5939700000	3287000000	2652700000	0	0	0	5939700000	3287000000	2652700000
SAM2	1	10	4	65.9	384	1.0629	1.0995	2617800000	1329300000	1288500000	1027400000	481540000	545860000	1590400000	847750000	742610000
RPO21	1	11	1	10	1733	N/A	1.099	1103500000	615550000	487910000	136270000	96480000	39792000	967180000	519070000	448110000
TIF35	1	2	1	12.8	274	N/A	1.0987	134330000	68478000	65854000	96648000	49134000	47514000	37684000	19343000	18341000
SPT6	1	10	5	8.5	1451	1.045	1.0983	1214300000	593350000	620980000	885910000	415270000	470640000	328420000	178080000	150340000
SBP1	1	6	1	36.4	294	0.99797	1.0978	1297100000	661560000	635540000	280210000	135010000	145210000	1016900000	526550000	490330000
NSA2	1	3	1	14.6	261	N/A	1.0974	267860000	146730000	121130000	63957000	34403000	29555000	203910000	112330000	91576000
TRP4	1	4	1	15.8	380	N/A	1.0958	133750000	62597000	71150000	37739000	14748000	22991000	96008000	47849000	48159000
STE20	1	5	3	8.5	939	1.0514	1.0932	471210000	204370000	266840000	389140000	161010000	228130000	82066000	43358000	38709000
RPL37A	1	3	3	77.3	88	0.93512	1.0916	1317600000	718310000	599310000	159910000	83865000	76042000	1157700000	634440000	523270000
UTP4	1	2	0	5.8	776	N/A	1.0914	106080000	68025000	38058000	0	0	0	106080000	68025000	38058000
RPN1	1	17	4	24.8	993	1.1065	1.091	4845600000	2419100000	2426500000	2983400000	1392000000	1591400000	1862200000	1027000000	835130000
TPO3	1	2	2	3.4	622	N/A	1.0909	1178100000	621360000	556770000	1063300000	559800000	503520000	114810000	61560000	53254000
CCT7	1	8	2	18.9	550	1.216	1.0897	902010000	466970000	435050000	211280000	96843000	114440000	690730000	370120000	320610000
TYW1	1	11	3	17.5	810	1.1486	1.0895	3166400000	1335600000	1830800000	800900000	396250000	404650000	2365500000	939390000	1426200000
ARO9	1	6	1	13.6	513	N/A	1.089	265170000	124710000	140460000	46308000	23255000	23054000	218860000	101450000	117410000
PDR17	1	4	2	12.3	350	N/A	1.0888	213930000	113210000	100730000	112010000	59116000	52892000	101920000	54089000	47834000
GET3	1	7	2	28.8	354	1.1183	1.0866	2134000000	651020000	1483000000	1760300000	452270000	1308000000	373750000	198750000	175000000
HRR25	1	3	0	6.9	494	N/A	1.0846	113450000	62554000	50893000	0	0	0	113450000	62554000	50893000
ILV5	1	12	3	38	395	0.93797	1.0844	7969200000	4109900000	3859300000	1513400000	767250000	746140000	6455800000	3342700000	3113200000
UFD2	1	3	1	5.2	961	N/A	1.0843	339640000	211470000	128170000	187550000	87582000	99966000	152090000	123880000	28208000
YPL260W	1	8	2	20.1	551	1.0697	1.0836	734370000	363710000	370660000	488450000	233530000	254920000	245920000	130180000	115750000
RPS29A	1	4	1	94.6	56	0.95266	1.0823	1941600000	1033500000	908010000	438310000	222350000	215960000	1503200000	811200000	692050000
AAT2	1	13	1	56.9	418	N/A	1.0813	3786700000	2057400000	1729300000	303940000	130650000	173290000	3482800000	1926700000	1556000000
GDI1	1	6	1	19.3	451	N/A	1.081	527180000	279420000	247760000	39868000	18151000	21717000	487310000	261270000	226040000
UTP10	1	4	2	3	1769	1.2845	1.081	180840000	87802000	93042000	128240000	59199000	69045000	52600000	28603000	23997000
SSO2	1	5	2	44.1	295	1.0733	1.0808	819590000	429960000	389630000	346980000	170250000	176730000	472610000	259710000	212910000
SEC27	1	14	4	27.8	889	1.0897	1.0807	1872500000	804690000	1067800000	860210000	412500000	447710000	1012300000	392180000	620070000
VTI1	1	3	1	17.5	217	0.72532	1.0807	856890000	474620000	382270000	91408000	51995000	39413000	765480000	422630000	342850000
BCY1	1	13	0	43.5	416	N/A	1.0805	2626400000	1484900000	1141500000	0	0	0	2626400000	1484900000	1141500000
PDR16	1	13	4	42.5	351	1.015	1.0798	2497700000	1511200000	986470000	141230000	63873000	77353000	2356400000	1447300000	909120000
RPL6A	1	5	6	52.3	176	1.0875	1.079	3549500000	1899800000	1649700000	1404800000	699470000	705350000	2144700000	1200400000	944340000
SSC1	2	22	10	49.1	654	1.0361	1.0785	15179000000	7829900000	7349500000	10004000000	4985900000	5018100000	5175400000	2844000000	2331400000
GCN20	1	5	1	11.7	752	N/A	1.0785	280420000	137880000	142540000	111060000	48354000	62702000	169360000	89524000	79837000
ARO1	1	23	2	20.4	1588	N/A	1.0784	1887500000	1026800000	860700000	101690000	61511000	40183000	1785800000	965240000	820510000
ARP2	1	4	3	15.1	391	1.1971	1.0782	1487800000	809650000	678180000	1248800000	685600000	563200000	239030000	124050000	114980000
CAP2	1	3	2	13.9	287	N/A	1.0777	242080000	133030000	109050000	113240000	61627000	51617000	128840000	71403000	57435000
STE3	1	7	0	19.8	470	N/A	1.0775	3488800000	1898100000	1590700000	0	0	0	3488800000	1898100000	1590700000
APL6	1	2	0	3.5	809	N/A	1.0774	61399000	32846000	28553000	0	0	0	61399000	32846000	28553000
UBA1	1	25	5	42.5	1024	1.1278	1.0767	4974000000	2703300000	2270700000	1555200000	791490000	763670000	3418800000	1911800000	1507000000
RPL7B	1	1	5	75.8	244	0.97106	1.0764	30534000000	16810000000	13724000000	9550200000	4906300000	4643800000	20984000000	11904000000	9079700000
PRE6	1	5	0	44.5	254	N/A	1.0754	229410000	121020000	108390000	0	0	0	229410000	121020000	108390000
TAF12	1	3	1	9.5	539	0.94255	1.0752	475290000	247070000	228220000	445430000	231250000	214180000	29863000	15822000	14041000
RPL24B	1	2	7	57.4	155	0.9335	1.0749	17864000000	9903000000	7960800000	1995900000	977530000	1018300000	15868000000	8925500000	6942500000
NPR2	1	4	0	11.2	615	N/A	1.0749	187600000	110490000	77109000	0	0	0	187600000	110490000	77109000
SRP68	1	4	2	10.2	599	1.1018	1.074	1091300000	553770000	537520000	982420000	487180000	495240000	108870000	66588000	42282000
FAS1 domain-containing protein YLR001C	1	13	0	20.4	862	N/A	1.0738	2766100000	1443500000	1322600000	0	0	0	2766100000	1443500000	1322600000
MAM3	1	13	0	43.5	706	N/A	1.0735	8427600000	4771100000	3656500000	0	0	0	8427600000	4771100000	3656500000
OSM1	1	10	0	31.1	501	N/A	1.0709	1089300000	616470000	472810000	0	0	0	1089300000	616470000	472810000
IML1	1	7	0	6.1	1584	N/A	1.0709	326230000	213010000	113220000	0	0	0	326230000	213010000	113220000
URA8	1	2	0	4.8	578	N/A	1.0708	56267000	30488000	25779000	0	0	0	56267000	30488000	25779000
RVS167	1	5	0	14.9	482	N/A	1.0706	643630000	327070000	316560000	0	0	0	643630000	327070000	316560000
RPL43B;RPL43A	2	7	2	89.1	92	0.91117	1.0704	2386900000	1349500000	1037400000	150180000	68335000	81849000	2236700000	1281200000	955550000
CRP1	1	17	5	40.9	465	1.0658	1.0699	5121600000	2455800000	2665800000	3138000000	1454600000	1683400000	1983600000	1001200000	982350000
SNX4	1	5	0	18.9	423	N/A	1.0699	119410000	52619000	66794000	0	0	0	119410000	52619000	66794000
YLR419W	1	4	1	3.6	1435	N/A	1.0697	538120000	273090000	265040000	428010000	218290000	209720000	110110000	54794000	55317000
RPL30	1	5	3	67.6	105	0.98127	1.0694	1612600000	910460000	702170000	947120000	524700000	422410000	665510000	385760000	279760000
PUB1	1	3	1	10.2	453	N/A	1.0689	746820000	405090000	341730000	76425000	38488000	37937000	670390000	366600000	303790000
DAK1	1	13	2	35.4	584	1.3153	1.0689	1919600000	951730000	967890000	821580000	360820000	460760000	1098000000	590910000	507130000
POR1	1	5	1	28.3	283	N/A	1.0687	1393200000	662740000	730440000	1167700000	535660000	632050000	225470000	127070000	98397000
MLP1	1	14	4	10.6	1875	0.87384	1.0678	1018100000	556830000	461260000	524080000	276580000	247500000	494010000	280250000	213760000
TCP1	1	8	1	23.1	559	1.0128	1.0657	824510000	458550000	365960000	366280000	196140000	170140000	458230000	262410000	195810000
NYV1	1	7	0	43.1	253	N/A	1.0654	6787700000	3786700000	3000900000	0	0	0	6787700000	3786700000	3000900000
NPT1	1	10	1	32.2	429	N/A	1.0653	643430000	340510000	302920000	0	0	0	643430000	340510000	302920000
OSH3	1	6	0	7.5	996	N/A	1.0648	227850000	128980000	98867000	0	0	0	227850000	128980000	98867000
RPL28	1	10	3	69.1	149	0.86249	1.064	29416000000	15974000000	13442000000	11658000000	5907800000	5749800000	17759000000	10066000000	7692600000
PEX25	1	4	0	17	394	N/A	1.064	582890000	352130000	230750000	0	0	0	582890000	352130000	230750000
ACT1	1	12	5	59.2	375	1.049	1.0614	25902000000	13102000000	12800000000	20065000000	9888200000	10177000000	5837000000	3213600000	2623500000
RPL34B	1	1	4	80.2	121	1.0603	1.0613	12091000000	6781100000	5310200000	161490000	87936000	73550000	11930000000	6693100000	5236700000
MET17	1	8	2	23.6	444	1.1358	1.0611	4563600000	2434800000	2128800000	1562500000	745280000	817250000	3001100000	1689500000	1311600000
APE1	1	19	1	68.9	514	1.4264	1.0607	4471300000	2403400000	2067900000	129910000	33741000	96171000	4341400000	2369700000	1971700000
HSC82	1	12	23	63.8	705	1.1084	1.0607	59272000000	31446000000	27826000000	30348000000	14936000000	15413000000	28924000000	16510000000	12414000000
INP54	1	2	0	5.7	384	N/A	1.0607	169270000	96272000	73002000	0	0	0	169270000	96272000	73002000
SCP160	1	50	12	55.9	1222	0.97102	1.0602	17502000000	9647200000	7854600000	5388400000	2730600000	2657800000	12113000000	6916600000	5196800000
PEP5	1	19	0	27	1029	N/A	1.0601	2950100000	1589000000	1361100000	0	0	0	2950100000	1589000000	1361100000
RPL31A;RPL31B	2	6	2	72.6	113	0.93193	1.06	3943500000	2143000000	1800500000	852480000	450840000	401640000	3091000000	1692100000	1398900000
Uncharacterized protein YMR315W	1	7	3	39	349	1.2207	1.0595	317640000	154560000	163080000	161360000	69290000	92066000	156280000	85267000	71014000
RPP0	1	9	2	48.7	312	1.2921	1.0593	11273000000	6298100000	4974500000	430820000	203550000	227270000	10842000000	6094600000	4747200000
DAP2	1	20	1	36.6	818	N/A	1.0591	19963000000	11184000000	8779100000	47512000	19413000	28099000	19916000000	11164000000	8751000000
ADE12	1	6	0	17.8	433	N/A	1.059	239800000	139910000	99890000	0	0	0	239800000	139910000	99890000
FUS3	1	2	1	7.6	353	N/A	1.0579	188790000	101360000	87437000	36683000	19096000	17586000	152110000	82260000	69850000
NOP14	1	7	0	13	810	N/A	1.0578	623000000	464210000	158790000	0	0	0	623000000	464210000	158790000
RPL8A	1	7	10	82	256	0.97903	1.0577	3819900000	2140000000	1679900000	566730000	287090000	279640000	3253200000	1852900000	1400200000
VAN1	1	6	0	21.7	535	N/A	1.0574	3472800000	409800000	3063000000	0	0	0	3472800000	409800000	3063000000
CDC39	1	4	1	3	2108	N/A	1.0572	151590000	83287000	68308000	92810000	46112000	46698000	58785000	37175000	21610000
ERG10	1	10	2	41.5	398	0.92257	1.0569	3061400000	1675200000	1386200000	913810000	494720000	419090000	2147600000	1180500000	967150000
RPL8B	1	8	11	82	256	0.95921	1.0566	49158000000	27445000000	21713000000	6470100000	3383400000	3086700000	42688000000	24062000000	18626000000
PAP1	1	2	0	4.9	568	N/A	1.0566	69122000	36339000	32783000	0	0	0	69122000	36339000	32783000
AKR2	1	7	0	16.6	749	N/A	1.0558	1048700000	585860000	462860000	0	0	0	1048700000	585860000	462860000
RPS25A	1	1	5	75.9	108	0.93086	1.0546	11996000000	6874700000	5121600000	1461400000	788870000	672540000	10535000000	6085900000	4449100000
ALG1	1	2	0	5.6	449	N/A	1.0545	54137000	34786000	19351000	0	0	0	54137000	34786000	19351000
THO2	1	4	3	3.5	1597	1.1037	1.0541	183200000	90875000	92321000	133470000	60807000	72662000	49726000	30067000	19659000
PAT1	1	5	1	12.3	796	1.0365	1.053	733630000	364450000	369180000	192980000	79996000	112990000	540640000	284450000	256190000
SEC21	1	10	3	17.1	935	1.1156	1.0526	939320000	459610000	479720000	556310000	257720000	298590000	383010000	201890000	181120000
RPL7A	1	1	5	75.8	244	N/A	1.0515	7041500000	3872900000	3168600000	681210000	328650000	352570000	6360300000	3544300000	2816000000
RPL27A;RPL27B	2	10	3	69.9	136	0.93558	1.0515	25412000000	14338000000	11074000000	557480000	255150000	302320000	24855000000	14083000000	10772000000
OSH7	1	5	0	14	437	N/A	1.0512	504560000	279400000	225160000	0	0	0	504560000	279400000	225160000
VPS62	1	14	0	32.3	467	N/A	1.0511	5556400000	3084900000	2471500000	0	0	0	5556400000	3084900000	2471500000
SEC24	1	9	1	13.9	926	1.1068	1.0502	1479200000	770090000	709080000	662840000	312080000	350760000	816340000	458010000	358330000
CAR2	1	7	1	32.8	424	N/A	1.0501	879340000	487490000	391850000	103750000	36720000	67035000	775590000	450770000	324820000
ATG22	1	3	0	10.8	528	N/A	1.05	441410000	240040000	201370000	0	0	0	441410000	240040000	201370000
YRA1	1	6	3	26.1	226	1.0205	1.0486	1235700000	657930000	577810000	556690000	271960000	284730000	679050000	385960000	293080000
RPS24B;RPS24A	2	9	4	71.1	135	0.91004	1.0483	13416000000	7599300000	5816500000	1459400000	774090000	685290000	11956000000	6825300000	5131200000
SSA1	1	11	16	69.2	642	1.1964	1.0483	86758000000	46134000000	40624000000	21953000000	9440200000	12513000000	64805000000	36694000000	28111000000
RPS15	1	3	2	21.1	142	0.94055	1.0482	5011900000	2823700000	2188300000	615430000	318380000	297050000	4396500000	2505300000	1891200000
NAP1	1	5	1	20.4	417	N/A	1.048	1594900000	882250000	712690000	72396000	32745000	39650000	1522500000	849510000	673040000
PRT1	1	19	6	40.2	763	0.94025	1.0473	5706500000	3234500000	2472000000	1185600000	622160000	563480000	4520800000	2612400000	1908500000
DIP2	1	4	0	5.1	943	N/A	1.047	59079000	31274000	27805000	0	0	0	59079000	31274000	27805000
Uncharacterized protein YCR016W	1	5	2	22.8	290	0.67459	1.0469	1850000000	1009700000	840320000	1767200000	963360000	803790000	82828000	46298000	36530000
ATG15	1	7	1	17.7	520	N/A	1.0469	914800000	499340000	415460000	96591000	45674000	50917000	818210000	453670000	364540000
PMT5	1	2	0	4.3	743	N/A	1.0464	101730000	52591000	49138000	0	0	0	101730000	52591000	49138000
PFK2	1	17	7	31.8	959	1.0265	1.0461	9772300000	5349300000	4423100000	3660800000	1842100000	1818700000	6111600000	3507200000	2604400000
FAA1	1	34	3	58.3	700	0.97606	1.0461	35297000000	19510000000	15787000000	134080000	66082000	68000000	35163000000	19444000000	15719000000
RPS16B;RPS16A	2	11	7	63.6	143	0.94397	1.0456	55932000000	29237000000	26695000000	50342000000	26089000000	24253000000	5590200000	3148200000	2442000000
GCD14	1	4	1	11.2	383	0.86553	1.0452	452910000	226270000	226640000	216520000	123940000	92578000	236390000	102330000	134060000
Putative sulfate transporter YPR003C	1	3	0	6.5	754	N/A	1.0451	313250000	161120000	152130000	0	0	0	313250000	161120000	152130000
PRE8	1	6	3	34.8	250	1.2407	1.0448	840830000	450740000	390090000	248700000	122280000	126420000	592130000	328460000	263670000
RPL2B;RPL2A	2	13	3	63.8	254	0.84652	1.0442	26360000000	14881000000	11479000000	266100000	139450000	126650000	26094000000	14741000000	11353000000
ARC1	1	14	5	39.4	376	1.0242	1.0435	5564200000	2495300000	3068900000	1347500000	670030000	677460000	4216700000	1825300000	2391400000
YLR173W	1	4	0	6.4	608	N/A	1.0435	592590000	329290000	263300000	0	0	0	592590000	329290000	263300000
RPL19B;RPL19A	2	10	5	55	189	0.92806	1.0434	22331000000	12344000000	9986200000	1835800000	953710000	882090000	20495000000	11391000000	9104100000
RPL35B;RPL35A	2	9	7	62.5	120	0.95967	1.0434	5675800000	2988500000	2687300000	2121900000	997960000	1124000000	3553900000	1990500000	1563400000
CCT8	1	12	3	32.4	568	1.0811	1.0432	3408600000	1683700000	1724900000	2541500000	1158700000	1382800000	867140000	525070000	342070000
RPL20B;RPL20A	2	8	4	58.1	172	0.96857	1.043	7598200000	3858300000	3739900000	971030000	486950000	484080000	6627100000	3371300000	3255800000
VTC3	1	36	1	54.3	835	N/A	1.0425	24912000000	13888000000	11024000000	58152000	17437000	40715000	24854000000	13871000000	10983000000
Uncharacterized protein YOL098C	1	6	2	8.5	1037	N/A	1.0415	392050000	211900000	180160000	103950000	36642000	67310000	288100000	175250000	112850000
RPS22B;RPS22A	2	5	2	51.5	130	1.0183	1.041	5065300000	2855400000	2209900000	997640000	492680000	504960000	4067600000	2362700000	1704900000
UPF0743 protein YCR087C-A	1	4	2	30.1	153	0.78436	1.0388	1364500000	651970000	712480000	1251500000	612010000	639470000	112970000	39961000	73012000
PYC1	1	4	1	17.3	1178	N/A	1.0385	976460000	536500000	439960000	26054000	13153000	12901000	950410000	523350000	427050000
SUI3	1	9	7	31.9	285	1.0045	1.0384	3257800000	1692200000	1565700000	2999400000	1560100000	1439200000	258470000	132030000	126440000
SUP35	1	19	8	42	685	0.97814	1.0381	7277700000	3767000000	3510700000	4326700000	2102600000	2224100000	2951100000	1664400000	1286600000
SAC6	1	13	4	31.8	642	1.2678	1.0377	2267900000	1155400000	1112500000	1010600000	451140000	559470000	1257300000	704270000	552990000
WTM1	1	11	5	34.6	437	1.0583	1.0374	8948900000	4558300000	4390600000	7075000000	3521600000	3553400000	1873900000	1036700000	837170000
RPL34A	1	1	4	80.2	121	N/A	1.0371	1517800000	841680000	676120000	0	0	0	1517800000	841680000	676120000
SRP1	1	4	0	13.1	542	N/A	1.0371	372900000	200500000	172390000	0	0	0	372900000	200500000	172390000
RPL1B;RPL1A	2	12	5	46.5	217	0.95816	1.0369	35920000000	18811000000	17109000000	27649000000	14159000000	13489000000	8271600000	4651900000	3619700000
RPL38	1	6	3	64.1	78	0.96239	1.0366	4234700000	2339300000	1895400000	1135600000	581700000	553870000	3099100000	1757600000	1341600000
RPS5	1	7	5	48.4	225	1.0132	1.0365	7867300000	4425400000	3441900000	1961500000	995170000	966380000	5905700000	3430200000	2475500000
RPS9B	1	1	4	73.3	195	0.98944	1.0364	4755200000	2533200000	2222000000	2406600000	1204500000	1202100000	2348600000	1328700000	1019900000
APE3	1	19	3	50.8	537	0.94882	1.0364	77983000000	43968000000	34015000000	1712100000	898700000	813410000	76271000000	43070000000	33201000000
SCY1	1	3	1	5.5	804	N/A	1.0358	46397000	28035000	18363000	0	0	0	46397000	28035000	18363000
YIM1	1	12	0	30.7	365	N/A	1.0356	2576200000	1362000000	1214200000	0	0	0	2576200000	1362000000	1214200000
Cysteine--tRNA ligase	1	23	7	40.3	767	1.0265	1.0352	2591200000	1393000000	1198300000	355480000	124640000	230840000	2235800000	1268300000	967440000
RPS26A	1	2	1	76.5	119	N/A	1.0349	4423300000	2500000000	1923300000	77845000	38173000	39672000	4345500000	2461900000	1883600000
CKB2	1	2	1	10.5	258	N/A	1.0341	256690000	148240000	108450000	94787000	57056000	37731000	161910000	91186000	70720000
RPL12B;RPL12A	2	7	4	62.4	165	0.98268	1.0337	16289000000	9042000000	7246900000	1658400000	833440000	824990000	14630000000	8208500000	6421900000
CYS3	1	12	4	53	394	1.1583	1.0337	6263000000	3293800000	2969200000	750070000	361620000	388450000	5512900000	2932200000	2580700000
RPL23B;RPL23A	2	6	3	60.6	137	0.96926	1.0334	6133500000	3289100000	2844400000	2180900000	1115300000	1065600000	3952600000	2173800000	1778800000
MDM20	1	7	1	9.3	796	N/A	1.0334	370030000	206680000	163350000	0	0	0	370030000	206680000	163350000
VMA8	1	8	1	56.6	256	N/A	1.033	9931300000	5673900000	4257400000	92941000	42933000	50008000	9838400000	5630900000	4207400000
RPS19B	1	1	3	88.9	144	0.95179	1.0324	10178000000	5812200000	4365700000	426850000	214800000	212050000	9751000000	5597400000	4153600000
RPL42B;RPL42A	2	7	5	38.7	106	0.91308	1.0324	6390900000	3249400000	3141500000	3543100000	1854400000	1688700000	2847900000	1395000000	1452800000
RPL4B	1	2	10	48.3	362	0.98951	1.0323	1602500000	899830000	702670000	911630000	472760000	438880000	690870000	427070000	263800000
CLU1	1	23	5	28.7	1277	0.97308	1.0323	2685700000	1410800000	1274900000	1314800000	636380000	678440000	1370900000	774410000	596480000
LCB4	1	23	1	48.7	624	1.002	1.0323	6315500000	3526900000	2788600000	402070000	203050000	199020000	5913500000	3323900000	2589600000
RPL10	1	13	4	57.5	221	0.97685	1.0321	19957000000	11440000000	8516600000	353700000	174670000	179030000	19603000000	11265000000	8337500000
RPL9A	1	2	6	73.3	191	0.94899	1.0318	22614000000	12403000000	10211000000	4195700000	2105800000	2089900000	18418000000	10297000000	8121200000
MHP1	1	10	0	11.1	1398	N/A	1.0318	594880000	335120000	259760000	0	0	0	594880000	335120000	259760000
RPL32	1	9	6	76.9	130	0.95131	1.0312	20976000000	11539000000	9436300000	5971700000	3118600000	2853200000	15004000000	8420700000	6583100000
UTP22	1	9	1	10.5	1237	1.0269	1.0311	759860000	398160000	361700000	339780000	154370000	185410000	420080000	243790000	176290000
CHS5	1	8	3	16.5	671	1.1216	1.0311	2119000000	970700000	1148300000	1852700000	812440000	1040200000	266290000	158260000	108030000
STM1	1	21	9	78.4	273	1.0076	1.031	28557000000	15244000000	13313000000	17448000000	8920200000	8528300000	11109000000	6324000000	4785000000
RPL5	1	9	4	49.8	297	0.90152	1.0308	4052400000	2135700000	1916700000	1955500000	1021500000	933960000	2096900000	1114200000	982790000
RPN7	1	9	5	26.6	429	1.2872	1.0306	1484000000	522500000	961530000	723400000	323230000	400170000	760640000	199270000	561360000
CTR9	1	7	2	8	1077	N/A	1.0304	226230000	120020000	106200000	35562000	19043000	16520000	190660000	100980000	89683000
SEA4	1	7	0	11.5	1038	N/A	1.03	573260000	320690000	252570000	0	0	0	573260000	320690000	252570000
RPL40B;RPL40A	2	2	4	63.3	128	N/A	1.0297	633500000	300410000	333080000	0	0	0	633500000	300410000	333080000
ZUO1	1	18	5	55.2	433	0.93823	1.0294	9413900000	5364800000	4049200000	456110000	234240000	221870000	8957800000	5130500000	3827300000
RPL3	1	29	8	72.6	387	1.0038	1.0292	42702000000	24440000000	18262000000	1576300000	776990000	799300000	41126000000	23663000000	17463000000
CCT2	1	7	2	18.4	527	1.1811	1.0292	2549400000	1708300000	841060000	2182000000	1508900000	673180000	367340000	199450000	167890000
CHC1	1	25	3	25.2	1653	1.016	1.0289	2407800000	1413200000	994610000	156390000	81229000	75163000	2251400000	1332000000	919450000
SEC23	1	7	2	18.9	768	0.85514	1.0285	707800000	386680000	321120000	168680000	94671000	74014000	539110000	292010000	247110000
TIF5	1	17	5	57	405	1.0078	1.0283	5805400000	3173400000	2632100000	3077200000	1592900000	1484300000	2728200000	1580500000	1147800000
RPL26B;RPL26A	2	10	6	81.1	127	0.99153	1.0281	8928500000	5004300000	3924200000	1574500000	767200000	807310000	7354000000	4237100000	3116900000
RPS18B;RPS18A	2	8	4	74.7	146	1.089	1.0276	4905900000	2743800000	2162100000	205800000	89511000	116290000	4700100000	2654300000	2045800000
RPL15A	1	3	2	58.3	204	0.97331	1.0273	21628000000	12263000000	9364900000	1257400000	634480000	622870000	20371000000	11629000000	8742000000
RPS4B;RPS4A	2	12	0	73.2	261	N/A	1.0273	21413000000	12102000000	9311700000	0	0	0	21413000000	12102000000	9311700000
RPS8B;RPS8A	2	12	3	45	200	0.89949	1.0272	10970000000	6325600000	4644500000	157530000	78146000	79382000	10813000000	6247500000	4565100000
SHM2	1	21	5	57.4	469	1.058	1.0271	5872600000	3237700000	2634900000	233650000	104540000	129100000	5639000000	3133200000	2505800000
YCF1	1	30	1	27.2	1515	1.1783	1.026	28533000000	16093000000	12439000000	472400000	225450000	246940000	28060000000	15868000000	12193000000
TAT2	1	5	0	7.4	592	N/A	1.0252	1015900000	537430000	478460000	0	0	0	1015900000	537430000	478460000
RPL33A	1	1	4	86.9	107	0.97029	1.025	7478600000	4177800000	3300900000	2101200000	1097900000	1003300000	5377400000	3079900000	2297600000
NAN1	1	8	2	13.1	896	0.77483	1.025	936150000	610210000	325940000	130210000	73096000	57113000	805940000	537110000	268830000
CAM1	1	8	3	28.4	415	1.045	1.0249	2248400000	1169500000	1078800000	1222300000	584670000	637680000	1026000000	584880000	441150000
RRP4	1	4	1	17.3	359	0.87428	1.0249	1359100000	725210000	633880000	1245500000	670950000	574530000	113610000	54260000	59347000
LEU4	2	8	1	17	619	N/A	1.0245	815140000	444570000	370570000	188480000	83646000	104830000	626670000	360930000	265740000
NOP1	1	13	4	40.1	327	1.0245	1.0234	6750700000	3506600000	3244100000	1613600000	570670000	1043000000	5137000000	2935900000	2201200000
YGR054W	1	10	5	22.3	642	0.97252	1.0231	5022000000	2637300000	2384700000	4476400000	2335300000	2141100000	545610000	301990000	243610000
RPL17A	1	1	3	75.5	184	1.0034	1.023	16695000000	9227600000	7467500000	1505000000	566850000	938180000	15190000000	8660700000	6529400000
ZTA1	1	4	1	12	334	N/A	1.0228	91984000	42898000	49086000	0	0	0	91984000	42898000	49086000
TMA20	1	3	0	17.1	181	N/A	1.0227	95232000	45820000	49412000	0	0	0	95232000	45820000	49412000
LYS9	1	5	1	17.7	446	N/A	1.0224	267790000	137100000	130690000	142350000	71416000	70929000	125440000	65683000	59761000
SIS1	1	12	3	40.6	352	0.75811	1.022	4164200000	2375000000	1789200000	218100000	119830000	98278000	3946100000	2255200000	1690900000
SPC42	1	2	0	8	363	N/A	1.0217	304310000	166950000	137360000	0	0	0	304310000	166950000	137360000
RPL16B	1	8	5	57.6	198	0.96289	1.0207	19546000000	10315000000	9231400000	17258000000	8986100000	8271900000	2288200000	1328700000	959500000
DHH1	1	9	3	22.7	506	1.1532	1.0205	613660000	345590000	268080000	65621000	39154000	26468000	548040000	306440000	241610000
RPL36B	1	2	2	44	100	0.97372	1.0202	8414100000	5348300000	3065800000	612650000	319020000	293640000	7801500000	5029300000	2772200000
RPS27B;RPS27A	2	3	2	50	82	0.93634	1.0202	9396400000	5298900000	4097500000	420240000	215460000	204780000	8976200000	5083500000	3892700000
ALD4	1	8	1	21	519	N/A	1.02	288130000	158290000	129850000	0	0	0	288130000	158290000	129850000
FRE6	1	7	0	16	712	N/A	1.0197	669590000	363600000	305980000	0	0	0	669590000	363600000	305980000
ADH3	1	5	4	18.1	375	1.099	1.0193	1055000000	527770000	527190000	818010000	394710000	423300000	236950000	133060000	103890000
RPS6B;RPS6A	2	14	4	71.6	236	0.86429	1.019	26133000000	14864000000	11269000000	1855500000	949290000	906170000	24278000000	13915000000	10363000000
IMD3	1	8	4	44.9	523	0.98823	1.0179	5724100000	3205600000	2518500000	1030100000	522730000	507390000	4694000000	2682900000	2011100000
RPS20	1	12	8	86.8	121	0.94288	1.0178	31893000000	17039000000	14854000000	16971000000	8715900000	8254800000	14922000000	8323000000	6598900000
CCT3	1	15	3	36.3	534	0.82263	1.0178	1496500000	731590000	764930000	374740000	200860000	173880000	1121800000	530730000	591060000
KRR1	1	5	0	18.4	316	N/A	1.0176	357680000	235280000	122390000	0	0	0	357680000	235280000	122390000
SEC26	1	12	2	17	973	0.99097	1.0176	1882600000	1067500000	815170000	1121800000	611820000	510010000	760810000	455640000	305170000
MSC3	1	3	1	5.8	728	N/A	1.0176	79907000	41420000	38487000	18000000	5670500	12329000	61907000	35749000	26158000
BFR2	1	6	2	18.2	534	0.52015	1.0169	266160000	162570000	103590000	76820000	48583000	28238000	189340000	113990000	75356000
RPL11B;RPL11A	2	12	7	61.5	174	0.96438	1.0166	18603000000	10031000000	8572500000	3516000000	1777100000	1739000000	15087000000	8253900000	6833500000
UTP8	1	9	3	19.9	713	0.8491	1.0166	814660000	484000000	330660000	463010000	258560000	204450000	351650000	225450000	126200000
SPC110	1	9	2	12.1	944	N/A	1.0164	1364900000	1011800000	353060000	1063000000	825310000	237710000	301850000	186490000	115350000
COS7	1	3	0	23.2	383	N/A	1.0158	345050000	162080000	182970000	0	0	0	345050000	162080000	182970000
ABP1	1	6	3	18.1	592	1.1432	1.0151	3304700000	1581000000	1723700000	3001000000	1412900000	1588000000	303700000	168020000	135680000
EGD1	1	8	5	65.6	157	1.0122	1.0148	1941900000	952620000	989270000	852510000	435670000	416850000	1089400000	516950000	572430000
RPL21B	1	1	5	66.2	160	0.97248	1.0146	21390000000	11610000000	9779700000	10618000000	5393900000	5224300000	10772000000	6216200000	4555400000
ADH6	1	10	0	44.2	360	N/A	1.0142	1362500000	778820000	583660000	0	0	0	1362500000	778820000	583660000
ASC1	1	18	9	96.2	319	0.95209	1.0138	29967000000	17672000000	12295000000	20679000000	12569000000	8110700000	9287900000	5103500000	4184500000
YPT11	1	3	0	9.8	417	N/A	1.0137	249680000	93449000	156230000	0	0	0	249680000	93449000	156230000
FRS1	1	21	3	41.3	595	1.1733	1.0132	5086900000	2882500000	2204400000	963910000	463730000	500170000	4123000000	2418700000	1704200000
FET5	1	8	0	20.4	622	N/A	1.0132	11202000000	6524200000	4677900000	0	0	0	11202000000	6524200000	4677900000
LRP1	1	3	0	19.6	184	N/A	1.013	121900000	66822000	55076000	0	0	0	121900000	66822000	55076000
RPS17B;RPS17A	2	7	4	71.3	136	0.94311	1.0127	9207600000	5036900000	4170700000	3539800000	1840500000	1699300000	5667800000	3196300000	2471500000
RPS13	1	7	2	60.9	151	N/A	1.0122	3434000000	1943400000	1490600000	47365000	25068000	22298000	3386700000	1918400000	1468300000
RTT103	1	2	0	6.1	409	N/A	1.0121	33235000	16402000	16833000	0	0	0	33235000	16402000	16833000
THR1	1	3	1	12	357	N/A	1.0118	136970000	85903000	51069000	0	0	0	136970000	85903000	51069000
TPA1	1	14	2	28.7	644	2.5085	1.0118	1208400000	590280000	618140000	338950000	97360000	241590000	869480000	492920000	376560000
ECM32	1	3	0	4	1121	N/A	1.0114	94142000	43468000	50674000	0	0	0	94142000	43468000	50674000
RPS2	1	15	2	92.5	254	0.96829	1.0112	11963000000	6643300000	5319700000	455010000	235450000	219560000	11508000000	6407800000	5100100000
RPL24A	1	2	8	57.4	155	0.85408	1.0111	3134800000	1710600000	1424100000	2051600000	1098100000	953480000	1083200000	612540000	470660000
RPL13B	1	2	3	33.2	199	0.90115	1.011	4545100000	2605400000	1939700000	78652000	30868000	47783000	4466400000	2574500000	1891900000
GFA1	1	9	2	16.3	717	1.0802	1.0107	825120000	443080000	382040000	185530000	87303000	98230000	639590000	355780000	283810000
YVH1	1	3	1	13.5	364	0.86197	1.0103	184600000	98452000	86153000	102480000	53357000	49121000	82126000	45094000	37032000
SRP54	1	8	1	19.6	541	1.1008	1.0101	910250000	509440000	400810000	247290000	117020000	130270000	662970000	392420000	270540000
RPL22A	1	4	3	76	121	1.0114	1.0099	2848100000	1549800000	1298300000	2079100000	1145800000	933350000	768990000	404020000	364970000
RPS11B;RPS11A	2	12	9	69.2	156	0.92174	1.0098	35100000000	19276000000	15823000000	26017000000	13979000000	12038000000	9082800000	5297700000	3785100000
RPL4A	1	2	10	48.3	362	0.95713	1.0097	20889000000	11722000000	9167200000	3782800000	1952300000	1830600000	17107000000	9770000000	7336600000
CKB1	1	3	1	15.1	278	N/A	1.0095	208650000	117420000	91227000	0	0	0	208650000	117420000	91227000
LOA1	1	8	2	26	300	0.92844	1.0094	590020000	342340000	247680000	145850000	77524000	68323000	444170000	264820000	179350000
ERG13	1	14	5	41.1	491	0.95672	1.0093	4240900000	2196000000	2044900000	618690000	289610000	329090000	3622200000	1906400000	1715800000
VPS38	1	4	0	15.5	439	N/A	1.0093	139960000	69612000	70346000	0	0	0	139960000	69612000	70346000
RPS14A;RPS14B	2	6	3	64.2	137	0.96806	1.0088	3654400000	2028400000	1626000000	1197100000	634590000	562500000	2457300000	1393800000	1063500000
PHO8	2	16	0	31.8	566	N/A	1.0086	23274000000	13254000000	10019000000	0	0	0	23274000000	13254000000	10019000000
VAM6	1	17	0	19.2	1049	N/A	1.0084	1559500000	860720000	698820000	0	0	0	1559500000	860720000	698820000
RPS3	1	9	7	50.4	240	0.98246	1.0082	9065900000	4168700000	4897200000	6131700000	2501500000	3630300000	2934200000	1667200000	1267000000
SLM4	1	3	1	23.5	162	N/A	1.0082	970960000	566370000	404600000	0	0	0	970960000	566370000	404600000
NOP15	1	3	0	10.9	220	N/A	1.008	183640000	97045000	86594000	0	0	0	183640000	97045000	86594000
CSC1	1	10	0	17.9	782	N/A	1.0079	1185000000	703780000	481250000	0	0	0	1185000000	703780000	481250000
RPS0A	1	2	2	40.5	252	N/A	1.0077	647460000	363100000	284360000	51633000	30064000	21569000	595830000	333040000	262790000
COP1	1	17	3	23.7	1201	1.0424	1.0075	1228900000	692210000	536670000	240350000	132400000	107950000	988530000	559810000	428720000
DET1	1	2	0	6	334	N/A	1.0073	108080000	61747000	46336000	0	0	0	108080000	61747000	46336000
FUS1	1	13	0	35.9	512	N/A	1.0072	3272800000	1851700000	1421100000	0	0	0	3272800000	1851700000	1421100000
RPS29B	1	4	1	94.6	56	N/A	1.0072	487620000	247130000	240490000	83899000	29777000	54122000	403720000	217350000	186370000
FPR3	2	5	1	15.8	411	0.94658	1.0064	1628800000	898340000	730450000	1042500000	553070000	489440000	586280000	345270000	241010000
TRX2	1	4	5	57.7	104	1.292	1.0056	6298800000	2708600000	3590200000	6243700000	2678500000	3565200000	55126000	30125000	25001000
ARF3	1	3	0	23	183	N/A	1.0052	148930000	82416000	66511000	0	0	0	148930000	82416000	66511000
SUI2	1	7	4	27.6	304	1.0153	1.0049	3886000000	1951200000	1934800000	3647600000	1813400000	1834100000	238380000	137720000	100650000
CPA2	1	15	2	23.3	1118	1.0985	1.0047	1932200000	1115500000	816690000	85524000	38722000	46802000	1846700000	1076800000	769880000
TRP5	1	19	5	33.9	707	1.1094	1.0046	6041300000	3220300000	2821000000	1622800000	765680000	857090000	4418600000	2454600000	1963900000
NAT3	1	3	0	15.9	195	N/A	1.0046	76304000	42624000	33680000	0	0	0	76304000	42624000	33680000
RPS1B	1	5	7	74.5	255	N/A	1.0042	6302300000	3541200000	2761100000	767180000	382590000	384590000	5535100000	3158600000	2376500000
SNU13	1	2	0	11.9	126	N/A	1.0041	83214000	48835000	34379000	0	0	0	83214000	48835000	34379000
Vacuolar membrane protein YNL058C	1	7	0	25.9	316	N/A	1.004	1257200000	747330000	509870000	0	0	0	1257200000	747330000	509870000
ERV46	1	6	0	26.3	415	N/A	1.0038	1725000000	927800000	797190000	0	0	0	1725000000	927800000	797190000
FRE8	1	6	1	10.1	686	N/A	1.0036	668660000	369510000	299140000	33915000	11788000	22127000	634740000	357730000	277020000
DPS1	1	21	6	39.5	557	1.0443	1.0032	4763200000	2599500000	2163800000	1184800000	585140000	599650000	3578400000	2014300000	1564100000
MET22	1	4	0	18.2	357	N/A	1.003	84814000	51667000	33147000	0	0	0	84814000	51667000	33147000
ATP2	1	8	1	26.6	511	0.77311	1.0029	1799900000	1078900000	721070000	1396900000	849750000	547120000	403060000	229110000	173960000
VIP1	1	10	3	10.8	1146	1.0797	1.0025	1151100000	617060000	534050000	834130000	427810000	406320000	316980000	189250000	127730000
YPR148C	1	6	4	19.8	435	1.1908	1.0024	1521000000	703580000	817430000	1409900000	643820000	766080000	111100000	59760000	51345000
YML020W	1	14	0	33.1	664	N/A	1.0022	2731200000	1508700000	1222500000	0	0	0	2731200000	1508700000	1222500000
YDL180W	1	3	0	11.5	547	N/A	1.0022	285450000	166000000	119440000	0	0	0	285450000	166000000	119440000
CDC33	1	4	2	25.8	213	N/A	1.0021	476120000	262510000	213600000	10897000	4156600	6740700	465220000	258360000	206860000
RPS7A	1	7	7	72.6	190	0.97092	1.0019	9081200000	5125000000	3956200000	2160700000	1133900000	1026800000	6920500000	3991100000	2929400000
FRS2	1	21	9	58.3	503	1.0035	1.0018	7442700000	3981200000	3461500000	4066000000	2035100000	2030900000	3376700000	1946100000	1430600000
MON1	1	4	0	7.6	644	N/A	1.0014	153900000	75570000	78332000	0	0	0	153900000	75570000	78332000
HMX1	1	7	0	30.9	317	N/A	1.0013	880280000	496600000	383690000	0	0	0	880280000	496600000	383690000
ATO3	1	2	1	4.7	275	0.88969	1.0013	170590000	85960000	84626000	19904000	10424000	9479700	150680000	75536000	75146000
PFK1	1	27	2	46.1	987	0.85883	1.0012	19169000000	10934000000	8234400000	109310000	48684000	60631000	19059000000	10886000000	8173800000
PAB1	1	32	14	60.1	577	0.94141	1.0011	27566000000	15250000000	12317000000	10667000000	5552300000	5115000000	16899000000	9697300000	7201700000
RPS23B;RPS23A	2	12	2	74.5	145	0.91425	1.0009	7949000000	4620100000	3328900000	380690000	204210000	176480000	7568300000	4415900000	3152400000
RPL14B	1	2	4	60.9	138	0.96659	1.0009	1002400000	428050000	574390000	249830000	93484000	156350000	752610000	334570000	418040000
TIF4631	1	20	13	34	952	0.89927	1.0009	8453500000	4622200000	3831300000	6479200000	3454000000	3025200000	1974300000	1168200000	806080000
DED1	1	12	3	31.8	604	1.1301	1.0007	2955300000	1628500000	1326800000	105460000	47123000	58332000	2849900000	1581400000	1268500000
GLN1	1	5	2	22.2	370	0.86885	1.0002	682160000	368200000	313960000	427280000	221970000	205310000	254890000	146240000	108650000
HOM2	1	14	6	51	365	1.0476	1	6425000000	3408400000	3016500000	2748400000	1334200000	1414200000	3676500000	2074200000	1602300000
RPS1A	1	6	9	74.9	255	0.94467	0.99993	34089000000	19115000000	14974000000	2867400000	1464300000	1403100000	31221000000	17651000000	13571000000
TDH2	1	4	11	88.6	332	1.1513	0.99976	10288000000	5483700000	4804600000	2806100000	1313200000	1492900000	7482200000	4170500000	3311700000
LSB6	1	12	0	28	607	N/A	0.99894	2581700000	1327700000	1254000000	0	0	0	2581700000	1327700000	1254000000
REP2	1	3	1	10.1	296	0.96771	0.99882	690930000	366120000	324820000	575680000	297180000	278500000	115260000	68937000	46319000
YVC1	1	9	1	19.3	675	N/A	0.99854	4483700000	2564800000	1919000000	43990000	16566000	27424000	4439800000	2548200000	1891500000
VMA1	1	43	8	57.2	1071	0.96659	0.99837	250240000000	144840000000	105400000000	1660300000	826280000	833980000	248580000000	144010000000	104560000000
SRO9	1	13	7	43.1	434	0.92897	0.99826	25981000000	13875000000	12106000000	24960000000	13322000000	11638000000	1021200000	552800000	468410000
VNX1	1	8	0	17.2	908	N/A	0.998	8900000000	5579400000	3320600000	0	0	0	8900000000	5579400000	3320600000
ALD3	2	5	0	12.6	506	N/A	0.99775	218060000	124180000	93876000	0	0	0	218060000	124180000	93876000
RPS26B	1	1	0	69.7	119	N/A	0.99774	923590000	529520000	394070000	0	0	0	923590000	529520000	394070000
GCD1	1	4	0	10	578	N/A	0.99727	50773000	31523000	19250000	0	0	0	50773000	31523000	19250000
ASP1	1	7	4	27	381	0.986	0.99684	2747300000	1315100000	1432200000	2444700000	1153700000	1291000000	302610000	161370000	141240000
SLY1	1	6	1	13.5	666	1.2753	0.99653	361380000	185140000	176240000	259480000	123200000	136280000	101890000	61937000	39956000
RPS30B;RPS30A	2	4	1	61.9	63	N/A	0.99651	562000000	332490000	229500000	22440000	10432000	12008000	539560000	322060000	217490000
CCT4	1	7	1	19.7	528	N/A	0.99648	500780000	280320000	220470000	104290000	52127000	52162000	396490000	228190000	168300000
SSZ1	1	21	6	58.7	538	1.0173	0.99646	10827000000	6022500000	4804400000	3720100000	1878400000	1841700000	7106900000	4144200000	2962700000
RPL18B;RPL18A	2	8	2	67.2	186	0.99683	0.99581	6296900000	3526300000	2770600000	395900000	211160000	184740000	5901000000	3315200000	2585800000
ENV7	1	2	0	9.3	364	N/A	0.99528	216690000	119070000	97618000	0	0	0	216690000	119070000	97618000
GUS1	1	19	9	30.1	708	0.90382	0.99526	5610500000	2975300000	2635200000	1229500000	611940000	617580000	4381000000	2363400000	2017600000
RPL6B	1	9	10	66.5	176	0.9849	0.99525	31512000000	16425000000	15087000000	26313000000	13488000000	12825000000	5199400000	2937100000	2262200000
AMD1	1	4	1	7.2	810	N/A	0.99365	273320000	152310000	121010000	84223000	46564000	37660000	189100000	105750000	83351000
RPS12	1	6	5	53.8	143	0.98887	0.99287	4618100000	2948200000	1670000000	1826700000	934380000	892300000	2791500000	2013800000	777660000
CMP2	1	3	1	7.3	604	N/A	0.99193	116330000	66347000	49978000	35764000	16423000	19341000	80561000	49924000	30638000
RPG1	1	44	8	59.6	964	1.011	0.99121	11467000000	6311100000	5155400000	1474400000	635150000	839230000	9992200000	5676000000	4316200000
TSL1	1	4	2	7.1	1098	N/A	0.99081	158420000	79093000	79326000	22528000	8724800	13803000	135890000	70368000	65523000
MBF1	1	6	0	61.6	151	N/A	0.99079	4059700000	2328100000	1731600000	0	0	0	4059700000	2328100000	1731600000
RPL13A	1	2	3	28.6	199	N/A	0.9903	419390000	236160000	183230000	0	0	0	419390000	236160000	183230000
ASN2	1	12	2	39	572	1.1748	0.99029	3639600000	1960000000	1679600000	1248000000	564670000	683380000	2391500000	1395300000	996230000
DED81	2	19	5	46	554	1.0079	0.98957	10826000000	5148800000	5677400000	4949100000	2341400000	2607800000	5877000000	2807400000	3069600000
HSE1	1	4	0	13.9	452	N/A	0.98944	259200000	158720000	100480000	0	0	0	259200000	158720000	100480000
TGL4	1	14	0	18.8	910	N/A	0.98924	1712000000	945950000	766020000	0	0	0	1712000000	945950000	766020000
RPL25	1	9	5	65.5	142	0.9752	0.98787	38448000000	20903000000	17544000000	31069000000	16687000000	14382000000	7379100000	4216800000	3162400000
TRM2	1	4	0	9.1	639	N/A	0.9878	151200000	83099000	68097000	0	0	0	151200000	83099000	68097000
FRA1	1	19	0	45.9	749	N/A	0.98771	10446000000	6153400000	4293000000	0	0	0	10446000000	6153400000	4293000000
IMD4	1	10	4	39.9	524	N/A	0.98722	993330000	556700000	436640000	88048000	39729000	48319000	905290000	516970000	388320000
ILV3	1	7	4	15.9	585	0.86678	0.98673	890860000	492120000	398740000	558270000	304020000	254250000	332590000	188100000	144500000
GPP2	1	5	7	47.2	250	N/A	0.98638	604330000	358690000	245650000	133920000	55000000	78919000	470410000	303690000	166730000
BAT2	1	4	0	20.2	376	N/A	0.9863	361050000	203250000	157810000	0	0	0	361050000	203250000	157810000
CPR1	1	9	9	55.6	162	1.2332	0.98625	6808100000	3478200000	3329900000	3392100000	1526900000	1865200000	3416000000	1951300000	1464700000
GCD11	1	15	3	42.7	527	0.97469	0.98624	7825300000	4352400000	3472900000	4256800000	2290300000	1966600000	3568500000	2062100000	1506400000
TDH3	1	8	12	81.9	332	1.0833	0.98578	325650000000	178720000000	146940000000	105740000000	51442000000	54302000000	219910000000	127270000000	92635000000
KRS1	1	19	0	46.5	591	N/A	0.98574	9943600000	5605300000	4338300000	0	0	0	9943600000	5605300000	4338300000
SRP40	1	5	4	14.5	406	0.88015	0.98562	2040500000	1144200000	896310000	1402600000	774000000	628640000	637900000	370220000	267670000
PPN1	1	19	0	47.2	674	N/A	0.98515	6765800000	3924000000	2841800000	0	0	0	6765800000	3924000000	2841800000
FUN12	1	23	5	28.9	1002	0.952	0.9847	6098400000	3307200000	2791300000	2482300000	1277700000	1204600000	3616100000	2029500000	1586700000
MNT3	1	9	0	24	630	N/A	0.98459	2743300000	1408900000	1334400000	0	0	0	2743300000	1408900000	1334400000
CYC8	1	5	3	11.2	966	0.89105	0.98454	1758100000	925510000	832580000	1659700000	863960000	795750000	98382000	61552000	36830000
VMA4	1	15	6	80.7	233	1.048	0.98431	24110000000	12857000000	11252000000	10889000000	5100800000	5788100000	13221000000	7756400000	5464200000
PRS1	1	4	1	15.5	427	N/A	0.98414	348200000	204230000	143980000	11707000	5810900	5895600	336500000	198420000	138080000
VTC4	1	38	0	59.1	721	N/A	0.98412	71941000000	41534000000	30407000000	0	0	0	71941000000	41534000000	30407000000
NMA111	1	6	1	7.7	997	N/A	0.98412	362010000	214020000	147990000	250730000	152380000	98346000	111280000	61641000	49640000
FMP42	1	4	0	6.9	504	N/A	0.98281	638020000	364790000	273230000	0	0	0	638020000	364790000	273230000
PTC2	1	4	2	10.8	464	N/A	0.98235	297590000	167630000	129960000	109920000	50306000	59617000	187670000	117330000	70339000
VBA1	1	3	1	8.2	562	N/A	0.98216	352140000	163590000	188550000	185440000	69218000	116230000	166700000	94373000	72325000
TGL5	1	7	0	17.8	749	N/A	0.98188	544880000	322450000	222430000	0	0	0	544880000	322450000	222430000
FAB1	1	17	0	12.1	2278	N/A	0.98173	1186100000	666330000	519730000	0	0	0	1186100000	666330000	519730000
RPS7B	1	7	5	66.8	190	0.93405	0.98108	4806400000	2577700000	2228700000	3410400000	1812500000	1597800000	1396100000	765190000	630900000
NIP1	1	14	3	20.2	812	0.98279	0.98074	1204500000	696380000	508110000	349540000	214930000	134620000	854950000	481450000	373500000
SSF2;SSF1	2	2	0	7.1	453	N/A	0.98058	201970000	126160000	75815000	0	0	0	201970000	126160000	75815000
PUF6	1	8	0	15.4	656	N/A	0.98015	616560000	339330000	277240000	0	0	0	616560000	339330000	277240000
COY1	1	7	2	14.7	679	1.0392	0.97982	944640000	500840000	443800000	341920000	175170000	166750000	602730000	325670000	277060000
DEF1	1	10	7	25.6	738	0.96988	0.97958	8553800000	4438100000	4115800000	7994400000	4120400000	3874000000	559400000	317670000	241730000
NEW1	1	25	4	33.2	1196	0.75793	0.97944	4438200000	2500000000	1938300000	1833300000	1015300000	818060000	2604900000	1484700000	1120200000
MDY2	1	3	2	21.7	212	1.0431	0.97852	933250000	509760000	423490000	846900000	464510000	382400000	86342000	45250000	41092000
PRE10	1	4	0	23.3	288	N/A	0.97622	680390000	375270000	305120000	0	0	0	680390000	375270000	305120000
VMA16	1	3	0	16.9	213	N/A	0.97622	196310000	116700000	79607000	0	0	0	196310000	116700000	79607000
TIF4632	1	10	5	16.4	914	1.1025	0.97609	1625500000	753900000	871580000	1329200000	585560000	743680000	296230000	168330000	127900000
GAR1	1	4	0	25.4	205	N/A	0.97604	838450000	495190000	343270000	0	0	0	838450000	495190000	343270000
ERB1	1	10	5	20.6	807	0.91306	0.97594	4325300000	2258400000	2066900000	3689600000	1882900000	1806700000	635640000	375460000	260180000
AVT7	1	2	1	5.5	490	N/A	0.97577	780920000	448640000	332280000	45376000	21586000	23790000	735540000	427050000	308490000
ANR2	1	8	1	23.3	516	N/A	0.97556	1041900000	604350000	437550000	23719000	12575000	11144000	1018200000	591770000	426410000
LYS20	1	2	0	20.6	428	N/A	0.9754	71781000	35513000	36268000	0	0	0	71781000	35513000	36268000
HTS1	1	6	0	15.2	546	N/A	0.97499	884750000	523410000	361340000	0	0	0	884750000	523410000	361340000
YTM1	1	9	2	33.3	460	0.90199	0.97414	2177700000	1205100000	972640000	1861300000	1012500000	848780000	316480000	192620000	123860000
PEP1	1	37	4	33.6	1579	1.4545	0.97353	13028000000	7257900000	5770200000	553220000	292170000	261050000	12475000000	6965700000	5509200000
ADE4	1	6	0	15.9	510	N/A	0.97245	793170000	446860000	346310000	0	0	0	793170000	446860000	346310000
PSE1	1	4	2	6.7	1089	0.94734	0.97237	494880000	252380000	242500000	429890000	213140000	216750000	64989000	39237000	25752000
EFT1	1	31	8	41.7	842	1.003	0.97202	59101000000	33971000000	25130000000	6519600000	3313900000	3205800000	52582000000	30657000000	21925000000
NOP16	1	2	0	10.8	231	N/A	0.97103	166270000	103370000	62905000	0	0	0	166270000	103370000	62905000
PEP3	1	15	1	21.2	918	N/A	0.9708	1311200000	697200000	613970000	219940000	57617000	162330000	1091200000	639580000	451640000
TEF4	1	16	8	49.8	412	0.96241	0.96986	10675000000	6058100000	4616600000	1768400000	902490000	865890000	8906300000	5155600000	3750700000
ARO2	1	15	4	66.2	376	1.0313	0.96958	7365000000	4225800000	3139200000	2757200000	1348100000	1409100000	4607800000	2877700000	1730000000
GGA2	1	9	2	20.9	585	1.1709	0.96919	4349600000	2208300000	2141300000	3591100000	1786100000	1805000000	758420000	422150000	336270000
URA2	1	47	10	33.1	2214	0.93083	0.96913	11706000000	5545100000	6160900000	3138900000	1662200000	1476700000	8567100000	3882800000	4684200000
Uncharacterized vacuolar membrane protein YGR125W	1	11	0	14.8	1036	N/A	0.96857	4386700000	2521100000	1865600000	0	0	0	4386700000	2521100000	1865600000
ACS2	1	18	3	45.1	683	1.0484	0.96792	6281500000	3639900000	2641700000	293620000	155000000	138620000	5987900000	3484900000	2503000000
ADE16	1	10	1	37.1	591	1.0133	0.96785	1120500000	671170000	449330000	252410000	134660000	117750000	868090000	536510000	331580000
PCM1	1	7	2	16.2	557	1.0556	0.96768	704290000	382810000	321480000	214830000	107760000	107070000	489460000	275050000	214410000
CCT6	1	9	4	15.8	546	1.0915	0.96725	1568100000	780290000	787800000	1231500000	583980000	647490000	336620000	196310000	140310000
TIF34	1	13	2	57.9	347	N/A	0.96666	2209900000	1285200000	924640000	302260000	165430000	136830000	1907600000	1119800000	787810000
CAR1	1	8	2	28.5	333	1.3609	0.96647	1059400000	505200000	554170000	509190000	194380000	314820000	550170000	310820000	239360000
YPT52	1	8	1	52.1	234	1.1039	0.96646	1404900000	752630000	652290000	222410000	112910000	109490000	1182500000	639720000	542800000
SEN1	1	2	0	1.1	2231	N/A	0.96622	45346000	27872000	17474000	0	0	0	45346000	27872000	17474000
VMA5	1	24	0	64	392	N/A	0.96546	30808000000	17945000000	12863000000	0	0	0	30808000000	17945000000	12863000000
ZRT3	1	9	1	28.6	503	N/A	0.9635	9152700000	5316200000	3836500000	31602000	15981000	15621000	9121100000	5300200000	3820800000
THS1	1	24	5	43.1	734	0.96752	0.96339	19272000000	10215000000	9056800000	13992000000	7147900000	6843700000	5279800000	3066800000	2213100000
SAH1	1	19	11	45.9	449	1.0355	0.96312	39256000000	22370000000	16886000000	11390000000	5645000000	5744900000	27866000000	16725000000	11141000000
ZRT1	1	5	0	16	376	N/A	0.96297	3146100000	1828000000	1318100000	0	0	0	3146100000	1828000000	1318100000
ADE2	1	7	0	21.4	571	N/A	0.96239	353860000	210490000	143370000	0	0	0	353860000	210490000	143370000
PRE1	1	5	2	31.8	198	N/A	0.9621	328940000	176670000	152270000	52240000	24255000	27985000	276700000	152410000	124280000
YGL114W	1	2	0	6.6	725	N/A	0.96152	350170000	202320000	147850000	0	0	0	350170000	202320000	147850000
YCK3	1	12	0	38.9	524	N/A	0.96118	20927000000	12268000000	8658800000	0	0	0	20927000000	12268000000	8658800000
NOP13	1	8	2	23.1	403	1.0374	0.96073	5429500000	2994800000	2434700000	4439500000	2389300000	2050100000	990050000	605490000	384560000
SFB3	1	5	1	6	929	N/A	0.96044	149700000	85525000	64172000	14330000	4814100	9516000	135370000	80711000	54656000
ERG20	1	11	4	42.9	352	1.2685	0.96034	3783000000	1937200000	1845700000	2195200000	1014500000	1180700000	1587800000	922790000	665010000
IKI3	1	7	2	6.3	1349	0.78975	0.96028	308660000	175640000	133030000	108440000	63789000	44646000	200230000	111850000	88380000
VMA2	1	20	5	46.8	517	1.0086	0.95984	86439000000	50344000000	36095000000	271620000	145420000	126200000	86167000000	50198000000	35969000000
Uncharacterized protein YDR089W	1	27	0	38.7	869	N/A	0.95976	11464000000	7358600000	4105400000	0	0	0	11464000000	7358600000	4105400000
AFG2	1	2	0	3.5	780	N/A	0.95957	101940000	43622000	58321000	0	0	0	101940000	43622000	58321000
VMA13	1	21	1	55.2	478	N/A	0.95951	15785000000	5728000000	10057000000	94117000	52451000	41667000	15691000000	5675600000	10015000000
BPT1	2	22	1	19.3	1559	0.68117	0.95932	8223900000	4942700000	3281200000	156720000	91819000	64905000	8067200000	4850900000	3216300000
RPN10	1	2	0	16.4	268	N/A	0.95929	108450000	62260000	46185000	0	0	0	108450000	62260000	46185000
RPE1	1	4	1	27.3	238	N/A	0.9589	177430000	95228000	82199000	101940000	50810000	51132000	75485000	44418000	31067000
SMF3	1	4	0	14.8	473	N/A	0.95861	1330600000	732900000	597740000	0	0	0	1330600000	732900000	597740000
TRP2	1	12	5	32.7	507	0.99572	0.95849	3267800000	1658700000	1609100000	2133600000	1000700000	1132900000	1134200000	657990000	476210000
AXL2	1	5	1	10.4	823	N/A	0.95848	607650000	265070000	342590000	307370000	83494000	223870000	300290000	181570000	118710000
CPR6	1	13	6	39.9	371	1.2345	0.95847	19442000000	4031300000	15411000000	14704000000	1359900000	13344000000	4738700000	2671400000	2067400000
BBC1	1	8	4	9.2	1157	1.1252	0.95835	2159300000	1107800000	1051500000	1974500000	992280000	982250000	184740000	115500000	69238000
KES1	1	19	2	53.2	434	0.97738	0.95824	5204000000	2854400000	2349600000	1716800000	879170000	837580000	3487200000	1975200000	1512000000
SUP45	1	11	5	23.8	437	0.89223	0.95766	4598600000	2319000000	2279600000	3965000000	1990000000	1975000000	633520000	328920000	304600000
VAC7	1	17	0	23.3	1165	N/A	0.95756	2951100000	1724700000	1226400000	0	0	0	2951100000	1724700000	1226400000
BMH2	1	3	5	48.7	273	1.1373	0.95685	2634900000	1343500000	1291400000	1919900000	918380000	1001500000	715050000	425160000	289890000
ILS1	1	26	9	31.9	1072	0.95761	0.95635	7991300000	4050100000	3941200000	4699400000	2325100000	2374200000	3291900000	1725000000	1567000000
GRS1	1	27	10	55.4	690	0.98207	0.95628	12809000000	7078600000	5730600000	4515200000	2311700000	2203500000	8294100000	4766900000	3527100000
BMS1	1	7	1	7.4	1183	N/A	0.95594	260660000	151920000	108740000	54070000	27307000	26764000	206590000	124610000	81976000
ERG6	1	20	6	74.4	383	1.1487	0.95589	29397000000	17005000000	12392000000	1379300000	668160000	711120000	28018000000	16337000000	11681000000
SES1	1	16	6	43.3	462	0.98811	0.95554	6995300000	3927000000	3068300000	1759300000	741580000	1017700000	5236000000	3185400000	2050600000
LSG1	1	9	1	23.9	640	N/A	0.95554	1390800000	331760000	1059000000	0	0	0	1390800000	331760000	1059000000
AHA1	1	7	2	24.6	350	1.0757	0.95493	4674800000	2402100000	2272700000	3525200000	1721800000	1803400000	1149600000	680330000	469250000
MES1	1	26	4	40.1	751	13.402	0.95485	8010400000	2753000000	5257400000	4092900000	513360000	3579600000	3917500000	2239600000	1677900000
TDA7	1	2	0	8.5	636	N/A	0.95427	425330000	233230000	192100000	0	0	0	425330000	233230000	192100000
TEF1	1	20	5	61.8	458	1.0152	0.95425	101600000000	59428000000	42171000000	5604400000	2855800000	2748600000	95995000000	56572000000	39423000000
KTR3	1	2	1	4.7	404	N/A	0.95417	352230000	202640000	149590000	32570000	12923000	19647000	319660000	189720000	129940000
EGT2	1	2	0	2.3	1041	N/A	0.95413	113810000	68281000	45529000	0	0	0	113810000	68281000	45529000
EGD2	1	7	5	71.3	174	1.0131	0.954	34524000000	17364000000	17160000000	33962000000	17026000000	16936000000	561680000	337290000	224390000
VAC14	1	4	0	6.5	880	N/A	0.95389	625280000	376750000	248540000	0	0	0	625280000	376750000	248540000
PHO91	1	19	0	23.4	894	N/A	0.95359	24778000000	14438000000	10340000000	0	0	0	24778000000	14438000000	10340000000
PGI1	1	24	8	65.9	554	1.0148	0.95321	39185000000	21791000000	17395000000	13865000000	6888900000	6976100000	25320000000	14902000000	10419000000
ADE5,7	1	10	5	14.6	802	1.0219	0.95281	2161700000	1152300000	1009400000	817400000	416150000	401250000	1344300000	736150000	608170000
TYS1	1	20	6	66.5	394	0.99564	0.95238	3826700000	2080300000	1746500000	1642600000	787450000	855150000	2184100000	1292800000	891310000
SRP72	1	9	0	14.4	640	N/A	0.95201	573570000	341420000	232150000	0	0	0	573570000	341420000	232150000
GCD10	1	3	1	11.7	478	N/A	0.95109	157150000	88698000	68455000	71084000	32750000	38334000	86069000	55948000	30121000
KKQ8	1	2	1	3.6	724	N/A	0.95096	76749000	36967000	39782000	0	0	0	76749000	36967000	39782000
GPM1	1	14	10	73.7	247	1.1189	0.95071	50365000000	28811000000	21555000000	7931500000	3706700000	4224800000	42434000000	25104000000	17330000000
GND1	2	18	4	59.7	489	1.0168	0.95054	7302800000	4176800000	3126000000	1895800000	946460000	949340000	5407000000	3230400000	2176700000
ADP1	1	17	0	22.5	1049	N/A	0.95044	8322100000	5099400000	3222700000	0	0	0	8322100000	5099400000	3222700000
POL5	1	3	1	3.4	1022	N/A	0.95018	173580000	97289000	76293000	68916000	39525000	29391000	104670000	57764000	46903000
GPD2	1	5	0	27.7	440	N/A	0.95016	629340000	355970000	273370000	0	0	0	629340000	355970000	273370000
VMA10	1	7	3	43.9	114	N/A	0.94914	5669200000	3418200000	2251000000	172940000	87796000	85144000	5496300000	3330400000	2165900000
FOL2	1	2	1	14.8	243	N/A	0.94914	189150000	100920000	88229000	100930000	51092000	49836000	88218000	49824000	38393000
RPC40	1	7	3	38.2	335	0.95517	0.94904	662700000	362700000	299990000	331730000	168480000	163260000	330960000	194230000	136740000
PRM4	1	4	0	20.1	284	N/A	0.94862	416930000	253100000	163830000	0	0	0	416930000	253100000	163830000
RPL36A	1	2	1	44	100	N/A	0.94855	513380000	298480000	214910000	0	0	0	513380000	298480000	214910000
RPT5	1	5	4	22.8	434	1.2341	0.94667	4177500000	1903200000	2274300000	4141100000	1881700000	2259400000	36477000	21542000	14934000
NOG2	1	6	0	13.4	486	N/A	0.9466	419420000	250370000	169050000	0	0	0	419420000	250370000	169050000
ARO8	1	15	1	52.6	500	N/A	0.94656	4342300000	2518100000	1824100000	11940000	6438100	5502200	4330300000	2511700000	1818600000
COT1	1	4	1	19.1	439	N/A	0.94646	2832200000	1548600000	1283600000	0	0	0	2832200000	1548600000	1283600000
YPK9	1	19	0	19	1472	N/A	0.9464	10295000000	2644900000	7649900000	0	0	0	10295000000	2644900000	7649900000
ARO3	1	7	2	23	370	N/A	0.94591	996840000	527380000	469450000	103930000	58312000	45622000	892900000	469070000	423830000
RPA190	1	36	3	33.1	1664	0.845	0.94574	4577900000	2715100000	1862900000	195700000	112060000	83636000	4382200000	2603000000	1779200000
RAT1	1	4	1	5.8	1006	N/A	0.94539	239980000	124790000	115190000	109230000	59601000	49628000	130750000	65189000	65560000
VRP1	1	4	2	11.1	817	1.0715	0.94441	272010000	123880000	148130000	223660000	95143000	128510000	48349000	28732000	19617000
YHR020W	1	22	8	51.6	688	0.95285	0.94435	7086000000	4100600000	2985400000	2853300000	1474600000	1378700000	4232700000	2626000000	1606700000
GLY1	1	9	5	29.2	387	1.1043	0.94396	2615300000	1414400000	1200900000	1320300000	658260000	662020000	1295000000	756180000	538830000
ADE13	1	4	2	9.3	482	0.76784	0.94395	1063700000	639480000	424220000	870590000	525370000	345220000	193110000	114120000	78995000
SNF1	1	4	1	11.1	633	1.0612	0.94392	1160500000	518950000	641550000	875360000	409490000	465860000	285140000	109460000	175680000
VTC2	1	38	1	55.7	828	N/A	0.94387	64453000000	37649000000	26804000000	30192000	16197000	13996000	64423000000	37633000000	26790000000
VHC1	1	19	1	23	1120	N/A	0.94312	6567800000	3971100000	2596700000	154770000	73427000	81347000	6413000000	3897700000	2515300000
PDC6	1	1	2	8	563	N/A	0.94303	167460000	109300000	58160000	0	0	0	167460000	109300000	58160000
SEC7	1	4	0	2.3	2009	N/A	0.94255	386380000	228180000	158200000	0	0	0	386380000	228180000	158200000
MAP1	1	8	4	31.3	387	0.93862	0.94241	4794000000	2608000000	2186000000	4140700000	2218900000	1921700000	653290000	389040000	264250000
CDC19	1	25	12	58.8	500	1.0318	0.94222	83394000000	45189000000	38205000000	29459000000	14412000000	15046000000	53935000000	30776000000	23158000000
GRX7	1	7	0	33	203	N/A	0.94202	4152500000	2254100000	1898400000	0	0	0	4152500000	2254100000	1898400000
WRS1	1	14	2	48.8	432	0.8804	0.94191	2107300000	1253800000	853500000	182930000	106400000	76525000	1924400000	1147400000	776980000
UTP25	1	2	0	4.4	721	N/A	0.9419	152450000	94190000	58258000	0	0	0	152450000	94190000	58258000
YEH1	1	7	0	20.2	573	N/A	0.94166	858960000	490850000	368110000	0	0	0	858960000	490850000	368110000
GIN4	1	5	2	5.5	1142	0.87343	0.94079	173780000	91175000	82607000	144290000	74013000	70280000	29489000	17162000	12327000
FTH1	1	6	1	16.6	465	N/A	0.9403	3342700000	1880000000	1462700000	0	0	0	3342700000	1880000000	1462700000
KRE2	1	13	3	39.4	442	1.1666	0.93931	10796000000	6293900000	4501800000	538660000	264920000	273740000	10257000000	6029000000	4228000000
PFF1	1	19	0	29.1	976	N/A	0.93901	13920000000	8174800000	5744800000	0	0	0	13920000000	8174800000	5744800000
ARX1	1	15	3	44.7	593	1.2126	0.93886	2781000000	1500000000	1281000000	804670000	403390000	401290000	1976300000	1096600000	879710000
SSB2	1	1	11	61.7	613	0.97105	0.93855	121520000000	69147000000	52370000000	33990000000	17650000000	16341000000	87527000000	51498000000	36029000000
KRE33	1	10	5	14.9	1056	0.87587	0.93847	1513500000	820550000	692910000	1133000000	583820000	549160000	380470000	236720000	143750000
SSA2	1	10	15	68.5	639	1.075	0.9382	65940000000	33998000000	31941000000	44703000000	21651000000	23052000000	21236000000	12347000000	8889200000
Uncharacterized membrane protein YNL320W	1	2	0	10.2	284	N/A	0.93737	94830000	57961000	36869000	0	0	0	94830000	57961000	36869000
RPF2	1	4	0	16.9	344	N/A	0.93662	556210000	180860000	375350000	0	0	0	556210000	180860000	375350000
KTR4	1	8	1	25.4	464	0.98996	0.93602	2106000000	1216100000	889910000	562060000	284310000	277750000	1544000000	931830000	612160000
RPL16A	1	6	6	42.7	199	0.91357	0.93547	28540000000	15203000000	13337000000	27955000000	14863000000	13093000000	584350000	339900000	244440000
NAT1	1	11	4	16.6	854	1.0149	0.9348	1493300000	759920000	733410000	1179200000	570030000	609150000	314150000	189890000	124260000
YEF3	2	44	15	61.6	1044	0.91595	0.93392	85407000000	49560000000	35847000000	11992000000	5882500000	6109500000	73415000000	43678000000	29738000000
PSA1	1	15	10	55.4	361	0.95605	0.9336	7561200000	4234500000	3326700000	2561400000	1300200000	1261200000	4999800000	2934300000	2065500000
AHP1	1	9	7	70.5	176	1.2189	0.93281	22619000000	11759000000	10860000000	18239000000	9313000000	8925800000	4380500000	2446200000	1934300000
RPA43	1	5	2	12.3	326	0.37826	0.93242	531390000	313600000	217780000	127240000	78667000	48574000	404150000	234940000	169210000
NOP2	1	14	3	35.9	618	1.0676	0.9322	2502200000	1391500000	1110700000	1128500000	548960000	579560000	1373700000	842520000	531160000
SCM4	1	5	1	26.2	187	N/A	0.93218	709630000	400500000	309130000	333430000	166990000	166430000	376210000	233500000	142700000
MAK5	1	6	1	10.3	773	N/A	0.93208	478610000	276910000	201700000	116280000	71287000	44995000	362330000	205630000	156700000
RMD8	1	12	0	30.5	662	N/A	0.93127	3916200000	2292700000	1623500000	0	0	0	3916200000	2292700000	1623500000
TIF3	1	6	3	22.5	436	0.89306	0.93014	453780000	267370000	186410000	151980000	82901000	69076000	301800000	184470000	117330000
SPN1	1	3	0	13.9	410	N/A	0.92916	130320000	78242000	52074000	0	0	0	130320000	78242000	52074000
ALA1	1	31	8	40.2	983	0.99343	0.92837	8261200000	4701000000	3560200000	3113300000	1540900000	1572400000	5147900000	3160100000	1987800000
APE2	1	21	2	32.2	952	1.1917	0.92798	1373200000	827430000	545740000	170250000	71180000	99069000	1202900000	756250000	446670000
VPH1	1	19	2	32.6	840	0.99907	0.92784	41946000000	24394000000	17552000000	1858000000	925170000	932830000	40088000000	23469000000	16619000000
TOM70	1	12	7	23.5	617	0.93748	0.92765	4421000000	2339600000	2081300000	4221800000	2225200000	1996600000	199150000	114450000	84700000
UBX3	1	3	0	11.9	455	N/A	0.92726	661340000	389230000	272110000	0	0	0	661340000	389230000	272110000
RRB1	1	6	1	16.8	511	N/A	0.9267	665160000	375330000	289830000	167980000	82786000	85194000	497180000	292540000	204630000
HIP1	1	8	0	22.1	603	N/A	0.92646	2915600000	1758900000	1156700000	0	0	0	2915600000	1758900000	1156700000
ILV2	1	7	1	12.5	687	0.937	0.92641	1280000000	730850000	549200000	890410000	488920000	401490000	389640000	241930000	147710000
RMD1	1	14	0	55.1	430	N/A	0.92571	6196600000	3643900000	2552700000	0	0	0	6196600000	3643900000	2552700000
GSH2	1	7	0	15.1	491	N/A	0.92569	319870000	180560000	139310000	0	0	0	319870000	180560000	139310000
LYS1	1	4	0	12.9	373	N/A	0.92505	477630000	290220000	187410000	0	0	0	477630000	290220000	187410000
NGL2	1	2	1	6.6	515	0.83727	0.924	344160000	188020000	156140000	291250000	148240000	143010000	52907000	39780000	13127000
CDC60	2	36	10	51.2	1090	0.95555	0.92384	12722000000	7093800000	5628400000	6270100000	3287600000	2982500000	6452100000	3806200000	2645900000
HAS1	1	9	2	25.5	505	1.0113	0.92323	1605500000	873570000	731970000	406080000	200460000	205620000	1199500000	673110000	526350000
CSR1	1	13	0	41.7	408	N/A	0.92267	1898300000	1084800000	813480000	0	0	0	1898300000	1084800000	813480000
PBN1	1	2	0	10.6	416	N/A	0.92242	48531000	27938000	20593000	0	0	0	48531000	27938000	20593000
NOP6	1	2	0	18.2	225	N/A	0.92206	191630000	124990000	66636000	0	0	0	191630000	124990000	66636000
DBP7	1	2	0	5.9	742	N/A	0.92186	68759000	39947000	28812000	0	0	0	68759000	39947000	28812000
PRE4	1	2	1	6.8	266	N/A	0.92176	134730000	78231000	56496000	0	0	0	134730000	78231000	56496000
SEC14	1	8	3	33.9	304	1.0639	0.92144	4998000000	2584800000	2413200000	3847500000	1904800000	1942700000	1150500000	679960000	470540000
LSM4	1	2	0	10.7	187	N/A	0.92136	113950000	64108000	49844000	0	0	0	113950000	64108000	49844000
VTC1	1	3	2	17.8	129	0.90876	0.9204	4240200000	2530300000	1709900000	270320000	151320000	119010000	3969800000	2379000000	1590900000
NCL1	1	22	6	41.4	684	0.94741	0.92014	4679900000	2585100000	2094800000	2440400000	1261000000	1179300000	2239500000	1324100000	915440000
ELP2	1	4	1	6.3	788	N/A	0.92007	103830000	60212000	43617000	0	0	0	103830000	60212000	43617000
DST1	1	6	2	32.7	309	1.0983	0.91953	2364100000	1147300000	1216800000	2172500000	1028000000	1144400000	191610000	119290000	72325000
URA7	1	13	3	33.5	579	0.95881	0.9192	2728500000	1635700000	1092800000	1056200000	606610000	449610000	1672200000	1029100000	643180000
RRP12	1	8	2	8.3	1228	0.92677	0.91907	358680000	213300000	145370000	50905000	28559000	22346000	307770000	184750000	123030000
LOC1	1	2	0	13.2	204	N/A	0.91896	103320000	63449000	39876000	0	0	0	103320000	63449000	39876000
ITR2	1	3	0	11.2	609	N/A	0.91889	415730000	241140000	174590000	0	0	0	415730000	241140000	174590000
AVT4	1	5	0	15.3	713	N/A	0.91859	3019600000	1811100000	1208500000	0	0	0	3019600000	1811100000	1208500000
FSH1	1	8	2	48.1	243	0.92719	0.91846	1155400000	621840000	533590000	745930000	386500000	359420000	409500000	235340000	174160000
UTP13	1	5	4	8.9	817	0.98659	0.91827	1162300000	600930000	561410000	1098600000	563550000	535020000	63774000	37386000	26388000
MDH3	1	8	1	42.3	343	N/A	0.91809	2143400000	1220900000	922480000	78671000	27609000	51062000	2064700000	1193300000	871420000
VCX1	1	2	1	7.1	411	N/A	0.91806	2354800000	1430200000	924650000	0	0	0	2354800000	1430200000	924650000
FUM1	1	6	3	17	488	1.1539	0.91733	507570000	294380000	213190000	154840000	78119000	76722000	352730000	216260000	136470000
VMA3	1	3	1	32.5	160	0.69807	0.91705	3294300000	1955200000	1339100000	162650000	114280000	48368000	3131700000	1840900000	1290800000
MET7	1	4	2	8.8	548	N/A	0.91677	388480000	211830000	176650000	0	0	0	388480000	211830000	176650000
SYN8	1	3	0	16.5	255	N/A	0.91676	144530000	76390000	68144000	0	0	0	144530000	76390000	68144000
RPA135	1	11	0	19.2	1203	N/A	0.91637	1342000000	797930000	544070000	0	0	0	1342000000	797930000	544070000
CKA2	1	4	1	13.3	339	N/A	0.9161	181990000	102950000	79049000	36693000	14650000	22043000	145300000	88296000	57006000
TUF1	1	9	2	30.4	437	0.7044	0.91601	1244500000	723860000	520640000	41650000	27047000	14603000	1202800000	696820000	506030000
DUG1	1	12	3	39.3	481	1.0047	0.91586	3633600000	1926200000	1707400000	328140000	159860000	168280000	3305500000	1766300000	1539200000
RBG2	1	5	2	21.5	368	1.4326	0.9154	541940000	272970000	268960000	393240000	193360000	199880000	148700000	79617000	69082000
RNR4	1	8	8	22.9	345	1.0181	0.91495	3101000000	1526800000	1574100000	2906800000	1421600000	1485200000	194140000	105200000	88946000
SER1	1	11	4	44.3	395	1.1971	0.91473	768510000	413680000	354830000	350030000	157920000	192110000	418480000	255760000	162710000
YKT6	1	9	5	44.5	200	1.0908	0.91461	2672500000	1194700000	1477800000	1618300000	681060000	937220000	1054200000	513630000	540560000
NCR1	1	10	0	10.3	1170	N/A	0.91441	4096600000	2166100000	1930500000	0	0	0	4096600000	2166100000	1930500000
PEX13	1	2	0	4.9	386	N/A	0.91434	61538000	33917000	27621000	0	0	0	61538000	33917000	27621000
CBF5	1	14	3	37.5	483	0.88224	0.91419	8291900000	4635300000	3656600000	4104100000	2139800000	1964300000	4187800000	2495400000	1692300000
DLD3	1	19	5	63.1	496	1.2214	0.91386	5295300000	2970900000	2324400000	1239500000	529800000	709710000	4055800000	2441100000	1614700000
GDH1	2	14	4	54.4	454	1.0109	0.91274	4720600000	2635700000	2084800000	1411600000	710280000	701340000	3308900000	1925500000	1383500000
GOS1	1	4	1	26.9	223	0.94364	0.9118	436550000	255130000	181420000	135660000	73437000	62226000	300880000	181690000	119190000
BRX1	1	4	1	18.6	291	N/A	0.91156	527520000	273560000	253950000	34027000	0	34027000	493490000	273560000	219930000
VMA6	1	7	0	46.4	345	N/A	0.91012	10872000000	6516100000	4356200000	0	0	0	10872000000	6516100000	4356200000
PUP1	1	2	0	14.9	261	N/A	0.91	185750000	117020000	68727000	0	0	0	185750000	117020000	68727000
FAA3	1	5	1	9.5	694	1.0282	0.90957	484130000	292320000	191800000	76587000	44248000	32339000	407540000	248080000	159460000
RPA49	1	9	0	36.9	415	N/A	0.90896	873990000	529360000	344620000	0	0	0	873990000	529360000	344620000
NUM1	1	9	3	18.9	2748	1.0795	0.9075	453300000	244930000	208370000	189580000	97151000	92433000	263720000	147780000	115940000
EBP2	1	9	2	20.4	427	0.85379	0.90748	2236300000	1204300000	1032000000	1723900000	911980000	811890000	512420000	292330000	220080000
KTR1	1	12	2	33.6	393	2.3905	0.90736	6654900000	3840100000	2814900000	195590000	45772000	149820000	6459300000	3794300000	2665100000
MCR1	1	6	1	25.5	302	N/A	0.90685	516600000	294740000	221860000	61022000	29439000	31584000	455580000	265310000	190280000
DNM1	1	4	2	8.7	757	2.1296	0.90681	256850000	100770000	156080000	155660000	42415000	113250000	101190000	58359000	42829000
NMD5;IRA2	2	2	0	1.7	1048	N/A	0.90663	117730000	62731000	55001000	0	0	0	117730000	62731000	55001000
PDC1	1	23	15	65.2	563	1.0114	0.90625	151350000000	88988000000	62359000000	12982000000	6643900000	6337600000	138370000000	82344000000	56022000000
DBP10	1	7	4	11.1	995	0.83651	0.90572	1370400000	722440000	647960000	1071400000	545890000	525530000	298970000	176540000	122420000
SUB2	1	14	7	41.5	446	0.98599	0.90526	8340400000	4343500000	3996800000	6405400000	3192100000	3213300000	1935000000	1151500000	783560000
NHP2	1	3	1	36.5	156	0.97806	0.90523	2277600000	1246100000	1031500000	1261900000	636230000	625700000	1015700000	609890000	405790000
RNA14	1	3	2	6.8	677	N/A	0.90484	558620000	299850000	258780000	378990000	191620000	187370000	179630000	108230000	71409000
RNR2	1	7	4	17.5	399	1.0085	0.90436	1986200000	1109800000	876420000	1170500000	625400000	545050000	815760000	484400000	331360000
UTP15	1	3	0	8.8	513	N/A	0.90406	150930000	72317000	78613000	0	0	0	150930000	72317000	78613000
GCY1	1	3	1	19.6	312	N/A	0.90344	228880000	140620000	88258000	0	0	0	228880000	140620000	88258000
PUS7	1	8	1	14.6	676	N/A	0.90326	1002600000	536330000	466300000	626060000	312150000	313900000	376580000	224180000	152400000
NOP4	1	16	5	36.1	685	0.87614	0.90299	4346700000	2273200000	2073500000	3427800000	1732200000	1695600000	918900000	540970000	377930000
RDH54	1	4	2	6.8	958	0.95471	0.90263	736410000	393430000	342980000	661860000	346170000	315690000	74551000	47259000	27292000
CYS4	1	23	2	58.8	507	0.89888	0.90126	10268000000	5960500000	4307200000	1246300000	578470000	667790000	9021400000	5382000000	3639400000
MAK16	1	3	1	13.1	306	N/A	0.90104	106650000	60466000	46187000	0	0	0	106650000	60466000	46187000
MCK1	1	4	1	19.5	375	0.99369	0.90026	2535900000	1316100000	1219800000	2382300000	1230100000	1152200000	153580000	85975000	67607000
TAL1	2	18	4	59.1	335	1.0579	0.90008	7516300000	3931400000	3584900000	3488100000	1533900000	1954200000	4028300000	2397600000	1630700000
RRP5	1	48	7	40.9	1729	0.89001	0.8995	6233900000	3606200000	2627700000	1588000000	821940000	766090000	4645900000	2784200000	1861600000
Uncharacterized GTP-binding protein YGR210C	1	5	0	16.1	411	N/A	0.89943	242490000	146580000	95909000	0	0	0	242490000	146580000	95909000
SFA1	1	9	3	25.1	386	1.0749	0.89941	1464900000	761540000	703380000	585830000	292430000	293400000	879090000	469100000	409980000
RLI1	1	13	1	26.8	608	N/A	0.89834	1942400000	1154100000	788300000	0	0	0	1942400000	1154100000	788300000
NOP7	1	12	4	23.3	605	0.8972	0.89831	3264600000	1780800000	1483800000	2325700000	1208800000	1116900000	938890000	571990000	366890000
MYO5	1	6	0	7.2	1219	N/A	0.89806	252060000	146050000	106010000	0	0	0	252060000	146050000	106010000
NAM7	1	6	2	9	971	N/A	0.89768	167070000	100840000	66229000	66373000	41165000	25207000	100700000	59675000	41022000
CRM1	1	4	1	4.1	1084	N/A	0.89759	171040000	95934000	75102000	29825000	11247000	18578000	141210000	84688000	56524000
TRR1	1	10	3	46.1	319	1.1759	0.89751	2900000000	1558800000	1341200000	1278800000	588000000	690820000	1621200000	970800000	650360000
CCS1	1	4	2	27.7	249	1.0869	0.89743	1081100000	532690000	548430000	847480000	390510000	456970000	233650000	142180000	91466000
THO1	1	4	1	38.5	218	1.096	0.89693	208870000	112130000	96743000	139300000	68659000	70643000	69573000	43473000	26100000
URA3	1	2	0	8.2	267	N/A	0.89688	271660000	157710000	113950000	0	0	0	271660000	157710000	113950000
KAP123	1	21	7	25.9	1113	0.87005	0.89687	2842200000	1683500000	1158600000	782340000	424360000	357980000	2059800000	1259200000	800670000
UTP20	1	2	0	0.9	2493	N/A	0.89683	34614000	19050000	15565000	0	0	0	34614000	19050000	15565000
YPR1	1	7	3	32.1	312	1.3258	0.89678	688970000	370380000	318590000	224790000	97233000	127550000	464180000	273150000	191030000
PCT1	1	7	0	19.8	424	N/A	0.89674	1046600000	620090000	426510000	0	0	0	1046600000	620090000	426510000
ERV41	1	2	0	8	352	N/A	0.89653	68901000	43617000	25283000	0	0	0	68901000	43617000	25283000
ARB1	1	15	4	30.8	610	0.94928	0.89645	7134400000	3947600000	3186800000	1804400000	914100000	890320000	5330000000	3033500000	2296500000
DBP2	1	10	1	37.2	546	N/A	0.89625	2057500000	1226100000	831440000	353470000	211860000	141610000	1704100000	1014200000	689830000
SAM1	1	10	6	65.7	382	1.0707	0.89506	8515900000	5226000000	3289900000	834240000	419800000	414440000	7681600000	4806200000	2875500000
ECM1	1	3	0	18.9	212	N/A	0.89477	102500000	62550000	39955000	0	0	0	102500000	62550000	39955000
URA5	1	5	2	30.1	226	0.9269	0.89365	2808900000	1384900000	1424000000	2483000000	1236500000	1246500000	325950000	148470000	177480000
NSR1	1	8	3	29.2	414	0.71422	0.89319	1676300000	917100000	759240000	131410000	104530000	26879000	1544900000	812560000	732360000
TY1B-ER1;TY1B-PR1;TY1B-PL;TY1B-LR2;TY1B-OL;TY1B-LR4;TY1B-DR4;TY1B-DR6;TY1B-PR3;TY1B-NL2	20	0	12	24.3	1755	0.96702	0.8928	9541700000	5296900000	4244900000	4737700000	2408300000	2329300000	4804100000	2888600000	1915500000
MRI1	1	6	2	21.9	411	1.0444	0.89279	1212600000	611190000	601450000	1043500000	511490000	532010000	169140000	99699000	69437000
NIP7	1	5	0	44.8	181	N/A	0.89271	330550000	197340000	133210000	0	0	0	330550000	197340000	133210000
RFA1	1	4	0	8.9	621	N/A	0.89179	278150000	163270000	114880000	0	0	0	278150000	163270000	114880000
BRL1	1	2	0	7.9	471	N/A	0.89154	111160000	67053000	44104000	0	0	0	111160000	67053000	44104000
TGL3	1	3	0	5.8	642	N/A	0.89151	71007000	40847000	30160000	0	0	0	71007000	40847000	30160000
VPS41	1	11	0	12.4	992	N/A	0.89138	1845400000	1369900000	475500000	0	0	0	1845400000	1369900000	475500000
ATP1	1	7	2	20.7	545	1.1816	0.89112	1009800000	575760000	434000000	244130000	111270000	132850000	765630000	464490000	301150000
VPS33	1	7	0	11.1	691	N/A	0.89071	938660000	554640000	384010000	0	0	0	938660000	554640000	384010000
ESF2	1	3	1	13	316	N/A	0.88983	79387000	46539000	32848000	0	0	0	79387000	46539000	32848000
PAN6	1	2	0	6.5	309	N/A	0.88974	51354000	31919000	19434000	0	0	0	51354000	31919000	19434000
DYS1	1	10	4	35.4	387	0.94569	0.88956	2381700000	1291300000	1090400000	1421900000	729690000	692260000	959740000	561570000	398170000
SPT5	1	9	1	15.4	1063	N/A	0.88944	559670000	334850000	224830000	91729000	44520000	47208000	467950000	290330000	177620000
MAK21	1	10	2	12.7	1025	0.89534	0.8892	1118600000	618800000	499830000	676190000	346110000	330080000	442430000	272680000	169750000
TSC10	1	2	1	8.8	320	N/A	0.88849	506280000	284480000	221800000	316270000	176900000	139370000	190010000	107570000	82431000
LHP1	1	4	2	18.9	275	0.90096	0.88833	1941000000	989290000	951710000	1754700000	883230000	871520000	186250000	106060000	80193000
TRL1	1	3	0	3.5	827	N/A	0.88777	113870000	59381000	54486000	0	0	0	113870000	59381000	54486000
HRK1	1	3	1	6.9	759	1.038	0.88776	1230900000	627130000	603740000	1061100000	531560000	529550000	169760000	95574000	74186000
NOP12	1	7	3	20.3	459	0.95397	0.88673	2712500000	1457300000	1255200000	2005000000	1038600000	966370000	707530000	418710000	288820000
EMP47	1	13	0	53.3	445	N/A	0.8863	2613600000	1564900000	1048700000	0	0	0	2613600000	1564900000	1048700000
CHS2	1	13	0	15	963	N/A	0.88608	2001800000	1152000000	849820000	0	0	0	2001800000	1152000000	849820000
HOC1	1	5	0	16.4	396	N/A	0.88608	784030000	462970000	321060000	0	0	0	784030000	462970000	321060000
HRI1	1	8	3	40.2	244	1.2268	0.88599	1601100000	861020000	740090000	735610000	335930000	399680000	865510000	525100000	340410000
Arginine--tRNA ligase, cytoplasmic	1	16	6	29.7	607	0.98323	0.88577	3865400000	2026300000	1839100000	2921300000	1460600000	1460800000	944100000	565720000	378380000
VMA11	1	2	0	34.8	164	N/A	0.8857	876770000	561700000	315070000	0	0	0	876770000	561700000	315070000
APA1	1	3	3	10.3	321	0.98544	0.88533	1112400000	565470000	546980000	1034600000	517890000	516680000	77875000	47579000	30296000
MNT2	1	4	0	5.6	558	N/A	0.88467	140970000	73774000	67196000	0	0	0	140970000	73774000	67196000
PRO1	1	2	1	7.5	428	0.90634	0.88419	607270000	344320000	262950000	581370000	328780000	252590000	25897000	15541000	10357000
GLN4	1	30	4	44.1	809	1.1105	0.88406	9195000000	5076800000	4118200000	3905400000	1879500000	2025900000	5289600000	3197300000	2092300000
TY1B-ML2;TY1B-GR2;TY1B-JR1;TY1B-JR2;TY1B-LR3;TY1B-GR1	11	0	11	24.3	1755	N/A	0.88389	140680000	84338000	56344000	0	0	0	140680000	84338000	56344000
NOB1	1	5	1	18.1	459	N/A	0.88359	359240000	216810000	142430000	100620000	51284000	49337000	258620000	165520000	93095000
NUG1	1	17	6	36.7	520	0.88145	0.88316	1786500000	1044600000	741900000	702310000	366680000	335630000	1084200000	677900000	406270000
DCS1	1	6	2	17.7	350	N/A	0.88305	243540000	127190000	116350000	84287000	34986000	49301000	159260000	92207000	67050000
ASN1	1	10	4	28.3	572	1.3935	0.88234	6190300000	1444200000	4746200000	5013300000	730750000	4282500000	1177100000	713410000	463640000
DUS3	1	7	0	12.7	668	N/A	0.88166	444480000	266400000	178080000	0	0	0	444480000	266400000	178080000
ESS1	1	3	0	23.5	170	N/A	0.88018	131100000	76938000	54166000	0	0	0	131100000	76938000	54166000
YBT1	3	47	1	39.4	1661	N/A	0.87885	69929000000	41678000000	28251000000	83717000	45718000	37998000	69845000000	41632000000	28213000000
BRE1	1	4	2	10	700	0.93013	0.87839	469510000	219240000	250270000	411140000	177960000	233170000	58378000	41278000	17100000
SWH1	1	5	0	5.1	1188	N/A	0.87837	179570000	103810000	75759000	0	0	0	179570000	103810000	75759000
COS8	1	3	0	15.5	381	N/A	0.87836	98902000	56829000	42073000	0	0	0	98902000	56829000	42073000
TMA22	1	3	1	21.7	198	3.3561	0.87825	7463100000	1133700000	6329400000	6994400000	845470000	6149000000	468640000	288210000	180430000
ADE6	1	24	4	30.1	1358	0.93996	0.8779	5746000000	3288900000	2457200000	2507900000	1329600000	1178200000	3238200000	1959200000	1278900000
STE23	1	7	4	8	1027	1.2024	0.87694	864640000	453660000	410970000	581780000	283100000	298680000	282860000	170560000	112290000
LSB5	1	2	0	9	354	N/A	0.87664	44391000	25691000	18699000	0	0	0	44391000	25691000	18699000
RBG1	1	2	0	5.1	369	N/A	0.87628	70374000	41074000	29300000	0	0	0	70374000	41074000	29300000
SAS10	1	7	4	15.7	610	0.8944	0.87551	1106200000	557940000	548240000	888560000	431760000	456800000	217620000	126180000	91440000
NOP9	1	6	2	13.5	666	N/A	0.87501	325260000	179000000	146260000	109420000	51446000	57971000	215850000	127550000	88292000
MTC5	1	6	0	5.4	1148	N/A	0.87498	161430000	108930000	52504000	0	0	0	161430000	108930000	52504000
SFH5	1	5	3	19.4	294	1.3319	0.87481	636110000	304500000	331610000	421600000	172870000	248730000	214510000	131630000	82885000
TSR1	1	5	0	7.5	788	N/A	0.87454	140560000	73725000	66840000	0	0	0	140560000	73725000	66840000
FBA1	1	24	14	89.7	359	0.97698	0.87442	56963000000	34183000000	22780000000	6501500000	3296700000	3204800000	50461000000	30886000000	19575000000
VTH2;VTH1	3	19	1	20.5	1549	N/A	0.87394	1256200000	767030000	489160000	0	0	0	1256200000	767030000	489160000
ENO2	1	16	18	84.2	437	1.0798	0.87385	241200000000	141110000000	100090000000	47278000000	23611000000	23667000000	193920000000	117500000000	76418000000
APE4	1	10	0	31.4	490	N/A	0.87381	2149200000	1288000000	861160000	0	0	0	2149200000	1288000000	861160000
HRP1	1	4	2	15.9	534	1.0884	0.87298	2197400000	1147000000	1050300000	2132100000	1108300000	1023800000	65280000	38779000	26501000
VAM3	1	9	0	50.2	283	N/A	0.87274	3698000000	2230200000	1467800000	0	0	0	3698000000	2230200000	1467800000
OLA1	1	11	2	39.3	394	1.0256	0.87163	2075800000	1251400000	824400000	339440000	172420000	167020000	1736400000	1079000000	657380000
ATG19	1	6	0	22.4	415	N/A	0.8715	345970000	209670000	136300000	0	0	0	345970000	209670000	136300000
VAS1	1	27	11	32.1	1104	0.95811	0.87128	10422000000	5981400000	4440800000	5223800000	2725800000	2498000000	5198400000	3255600000	1942800000
NOP8	1	4	2	8.7	484	0.90011	0.87095	701280000	385590000	315690000	595580000	327110000	268480000	105690000	58484000	47209000
MTR4	1	14	2	18.1	1073	0.99903	0.87093	1275600000	667110000	608500000	544030000	278570000	265450000	731590000	388540000	343050000
NMD3	1	4	1	9.3	518	N/A	0.86858	201860000	109170000	92689000	40222000	21080000	19143000	161640000	88090000	73547000
SEC65	1	5	2	28.9	273	0.9034	0.86857	347930000	220680000	127250000	141020000	78380000	62643000	206910000	142300000	64604000
NOC2	1	18	1	22.8	710	N/A	0.86839	1212300000	696990000	515300000	19130000	9227300	9902500	1193200000	687770000	505400000
SLT2	1	3	0	8.5	484	N/A	0.86834	23890000	15734000	8155800	0	0	0	23890000	15734000	8155800
PAM1	1	3	1	4.8	830	N/A	0.86795	83539000	44202000	39337000	23891000	11465000	12426000	59648000	32737000	26911000
SRP21	1	1	0	11.4	167	N/A	0.86764	51562000	29734000	21828000	0	0	0	51562000	29734000	21828000
HEK2	1	4	1	19.9	381	N/A	0.86737	216130000	133510000	82620000	33673000	20029000	13644000	182450000	113480000	68976000
AVT1	1	6	0	15.8	602	N/A	0.86689	1111500000	680320000	431160000	0	0	0	1111500000	680320000	431160000
NOP58	1	16	7	49.7	511	0.88582	0.86649	5785000000	3271100000	2513900000	2049800000	1067700000	982080000	3735200000	2203400000	1531800000
CCT5	1	8	3	21.7	562	1.3751	0.86551	1305600000	625520000	680100000	1044900000	481660000	563220000	260730000	143850000	116880000
GSP1	1	1	4	35.6	219	0.99006	0.86463	32956000000	16750000000	16207000000	31185000000	15782000000	15403000000	1770700000	967510000	803190000
PUS1	1	9	3	22.6	544	0.94241	0.86323	2837800000	1461800000	1375900000	2409200000	1206200000	1203000000	428570000	255670000	172900000
GLO1	1	6	1	25.2	326	N/A	0.86253	788610000	410190000	378410000	490680000	233410000	257280000	297930000	176790000	121140000
CMS1	1	3	0	14.1	291	N/A	0.8621	108390000	64361000	44025000	0	0	0	108390000	64361000	44025000
ADH1	2	20	10	77.3	348	1.083	0.86125	91865000000	53438000000	38427000000	12295000000	5809300000	6485600000	79570000000	47629000000	31941000000
RRP7	1	3	0	10.1	297	N/A	0.85955	150680000	93133000	57550000	0	0	0	150680000	93133000	57550000
PFY1	1	3	2	39.7	126	1.3711	0.85933	336470000	142920000	193550000	304560000	124380000	180180000	31910000	18539000	13370000
PRO2	1	8	1	24.1	456	N/A	0.85926	2898100000	1522400000	1375700000	1920600000	936840000	983740000	977510000	585570000	391930000
Probable dipeptidyl peptidase 3	1	6	1	14.8	711	N/A	0.85918	260830000	130730000	130100000	175220000	76478000	98744000	85609000	54251000	31359000
PYC2	1	2	1	13.1	1180	N/A	0.85917	149020000	97194000	51822000	0	0	0	149020000	97194000	51822000
ADK1	2	6	4	35.6	222	0.84866	0.85792	631980000	351710000	280270000	552600000	304280000	248330000	79380000	47436000	31944000
MET6	1	41	10	73.7	767	1.0167	0.85765	26615000000	15100000000	11515000000	10109000000	4978600000	5130200000	16507000000	10122000000	6384700000
ARI1	1	4	2	18.2	347	1.3523	0.85708	726810000	349870000	376950000	485700000	215870000	269830000	241110000	133990000	107120000
MDG1	1	6	3	23	366	0.99224	0.85693	307240000	150450000	156790000	224990000	105310000	119680000	82247000	45140000	37108000
ELP3	1	3	0	9.2	557	N/A	0.8558	75334000	46957000	28377000	0	0	0	75334000	46957000	28377000
TY1B-DR5;TY1B-PR2;TY1B-ML1;TY1B-DR1;TY1B-OR;TY1B-MR2;TY1B-H;TY1B-GR3;TY1B-LR1;TY1B-ER2;TY1B-BR	12	0	10	23.2	1755	N/A	0.8555	524310000	314880000	209430000	218860000	126270000	92596000	305440000	188610000	116840000
NUP1	1	4	1	5.8	1076	N/A	0.85239	123820000	69619000	54198000	32988000	17462000	15525000	90829000	52156000	38673000
GPH1	1	1	0	2.9	902	N/A	0.85209	67679000	42401000	25278000	0	0	0	67679000	42401000	25278000
DIS3	1	3	0	4.4	1001	N/A	0.85108	143510000	80790000	62722000	0	0	0	143510000	80790000	62722000
RNR1	1	7	5	12.4	888	0.83298	0.85076	3916300000	2091200000	1825100000	3425800000	1788200000	1637700000	490500000	303080000	187420000
SYG1	1	12	0	18.8	902	N/A	0.85075	6963600000	4259300000	2704300000	0	0	0	6963600000	4259300000	2704300000
FAT1	1	11	0	26.2	669	N/A	0.85026	1140100000	667520000	472620000	0	0	0	1140100000	667520000	472620000
MRD1	1	8	3	9.6	887	0.59646	0.84971	1642200000	518620000	1123600000	691600000	365700000	325900000	950630000	152920000	797710000
SOL2	2	3	0	7.6	315	N/A	0.84766	62747000	39213000	23535000	0	0	0	62747000	39213000	23535000
CIC1	1	6	0	20.2	376	N/A	0.84744	921880000	332960000	588920000	0	0	0	921880000	332960000	588920000
EDE1	1	9	4	10	1381	1.0909	0.84639	1392600000	703780000	688830000	1302200000	649580000	652660000	90362000	54200000	36163000
UTP7	2	4	2	9.9	554	0.89585	0.84571	273310000	140220000	133090000	165530000	79906000	85627000	107780000	60311000	47468000
RQC2	1	5	0	5.7	1038	N/A	0.84415	169100000	101750000	67350000	0	0	0	169100000	101750000	67350000
ZRC1	1	3	0	8.1	442	N/A	0.84396	1553100000	938320000	614780000	0	0	0	1553100000	938320000	614780000
HCA4	1	7	5	11.8	770	0.87237	0.84221	390430000	227350000	163070000	233740000	132250000	101480000	156690000	95101000	61590000
TIF1	1	11	3	43.5	395	1.0043	0.8419	15034000000	8154700000	6879300000	11653000000	6105300000	5548100000	3380600000	2049400000	1331200000
HXK2	1	16	7	61.7	486	1.0475	0.84184	14936000000	8874200000	6061800000	2047200000	980880000	1066300000	12889000000	7893300000	4995500000
RDI1	1	5	2	44.1	202	1.1569	0.84182	1696800000	919360000	777450000	746360000	340750000	405610000	950460000	578610000	371850000
HCH1	1	4	3	29.4	153	1.5052	0.84147	894400000	417830000	476570000	589080000	229310000	359770000	305320000	188520000	116800000
HIS1	1	5	0	19.2	297	N/A	0.8411	365010000	223280000	141730000	0	0	0	365010000	223280000	141730000
TUB1	2	5	0	23	447	N/A	0.84006	244060000	136570000	107490000	0	0	0	244060000	136570000	107490000
DRE2	1	4	2	16.7	348	0.62841	0.83895	254680000	160310000	94371000	148390000	96093000	52292000	106290000	64215000	42078000
TMA46	1	8	4	29.9	345	0.92746	0.83855	725970000	399000000	326960000	432790000	216250000	216540000	293180000	182750000	110420000
TMA10	1	3	0	52.3	86	N/A	0.83733	182810000	108690000	74123000	0	0	0	182810000	108690000	74123000
HOM6	1	16	5	66.6	359	1.0221	0.8362	4982800000	2761300000	2221400000	2431400000	1178800000	1252600000	2551400000	1582600000	968820000
TMA19	1	8	6	35.3	167	0.9806	0.83519	8784300000	4583300000	4201000000	7949700000	4075000000	3874700000	834620000	508320000	326300000
ERG1	1	9	2	37.5	496	0.64604	0.83512	5510700000	3420100000	2090700000	231640000	147390000	84251000	5279100000	3272700000	2006400000
UTP9	1	4	1	6.4	575	N/A	0.83399	7221200000	4417900000	2803400000	0	0	0	7221200000	4417900000	2803400000
MAP2	1	5	2	20	421	1.0149	0.83323	4191000000	2118400000	2072500000	4026000000	2026800000	1999200000	164980000	91655000	73329000
LEU1	1	20	8	37.7	779	0.9622	0.83161	6473100000	3690100000	2782900000	3734900000	1975300000	1759600000	2738100000	1714800000	1023300000
HBS1	1	3	1	8.8	611	N/A	0.83091	261040000	124760000	136280000	187610000	81858000	105760000	73427000	42899000	30528000
PPT1	1	2	1	3.1	513	N/A	0.83072	123960000	66397000	57560000	64509000	30976000	33533000	59447000	35421000	24026000
RKI1	1	5	3	24.8	258	0.88791	0.83042	546310000	281980000	264340000	261520000	97941000	163580000	284790000	184030000	100760000
PET10	1	12	0	58.7	283	N/A	0.83025	11137000000	6904700000	4232100000	0	0	0	11137000000	6904700000	4232100000
PGK1	1	33	15	79.6	416	1.092	0.82919	164690000000	95229000000	69462000000	49696000000	24671000000	25025000000	114990000000	70558000000	44437000000
UPF0642 protein YBL028C	1	3	0	23.6	106	N/A	0.82882	143540000	89168000	54377000	0	0	0	143540000	89168000	54377000
VBA4	1	13	1	14.6	768	N/A	0.82874	9085400000	5675200000	3410200000	106880000	62182000	44702000	8978500000	5613100000	3365500000
DBP3	1	11	2	27.2	523	0.81752	0.82799	1618400000	919880000	698500000	641670000	312720000	328950000	976720000	607170000	369550000
ACO2	1	3	1	6.2	789	N/A	0.82777	36086000	25168000	10917000	0	0	0	36086000	25168000	10917000
TRM82	1	5	1	15.3	444	N/A	0.82708	385090000	249540000	135550000	32973000	18546000	14427000	352110000	230990000	121120000
ZEO1	1	12	11	69.9	113	0.99099	0.82299	14736000000	7709200000	7027200000	12660000000	6419900000	6240000000	2076600000	1289300000	787270000
NIF3	1	7	1	29.2	288	N/A	0.82258	683210000	410150000	273060000	0	0	0	683210000	410150000	273060000
IPP1	1	11	6	42.9	287	1.0125	0.82126	9678100000	5353900000	4324100000	6182200000	3189000000	2993300000	3495900000	2165000000	1330900000
PRS5	1	4	1	15.5	496	N/A	0.82104	336000000	205610000	130400000	35086000	21738000	13348000	300920000	183870000	117050000
CCC1	1	7	0	30.1	322	N/A	0.81958	7847900000	4817600000	3030300000	0	0	0	7847900000	4817600000	3030300000
MRT4	1	8	3	55.1	236	N/A	0.81894	435700000	252380000	183320000	62281000	23599000	38682000	373420000	228780000	144640000
MVD1	1	6	1	27.3	396	N/A	0.8173	611410000	374390000	237020000	76374000	40465000	35909000	535030000	333920000	201110000
Uncharacterized membrane protein YCR023C	1	4	0	4.7	611	N/A	0.81715	604310000	360890000	243420000	0	0	0	604310000	360890000	243420000
AVT3	1	4	0	9.2	692	N/A	0.81687	734550000	445730000	288820000	0	0	0	734550000	445730000	288820000
TPI1	1	12	2	86.3	248	1.0265	0.81663	44411000000	24894000000	19518000000	18237000000	8849600000	9387200000	26175000000	16044000000	10131000000
DUP240 protein YAR028W	1	2	1	19.7	234	1.015	0.81613	455450000	270850000	184600000	157960000	85287000	72676000	297480000	185560000	111920000
SPE3	1	8	2	25.9	293	N/A	0.81581	1033300000	628450000	404840000	123370000	57375000	65991000	909920000	571070000	338850000
DUT1	1	4	0	39.5	147	N/A	0.81533	576020000	366980000	209040000	0	0	0	576020000	366980000	209040000
SEC53	1	9	4	44.5	254	0.97307	0.81421	11144000000	5380500000	5763900000	9262200000	4231100000	5031100000	1882200000	1149400000	732780000
YER156C	1	7	2	26.6	338	0.87355	0.81413	537530000	299830000	237700000	250550000	133060000	117500000	286980000	166770000	120210000
CPR4	1	7	0	32.7	318	N/A	0.81216	1849400000	1181200000	668200000	0	0	0	1849400000	1181200000	668200000
KTR6	1	16	0	53.4	446	N/A	0.80895	6532000000	4255900000	2276100000	0	0	0	6532000000	4255900000	2276100000
ERG8	1	4	1	15.5	451	N/A	0.80872	421460000	237390000	184070000	299550000	166040000	133510000	121920000	71356000	50560000
DBP5	1	9	5	21.8	482	0.97592	0.80777	17202000000	9929500000	7272200000	2038500000	999730000	1038700000	15163000000	8929800000	6233500000
RRP8	1	3	1	9.4	392	0.79783	0.80704	1687400000	925110000	762310000	1559300000	845840000	713420000	128160000	79272000	48891000
AIM20	1	5	0	34.3	204	N/A	0.80589	274480000	173340000	101140000	0	0	0	274480000	173340000	101140000
RLP7	1	4	0	17.4	322	N/A	0.8054	373270000	227320000	145940000	0	0	0	373270000	227320000	145940000
GUA1	1	16	5	44.4	525	0.86971	0.80525	3359000000	1993200000	1365800000	910140000	485310000	424820000	2448900000	1507900000	941000000
RRP15	1	3	1	15.6	250	N/A	0.80514	248830000	114030000	134800000	131810000	35420000	96391000	117020000	78612000	38407000
ARO4	1	12	4	55.1	370	0.93511	0.80072	10655000000	5954500000	4700200000	8143200000	4370400000	3772800000	2511500000	1584100000	927400000
SHO1	1	1	0	4.9	367	N/A	0.80024	256850000	157010000	99840000	0	0	0	256850000	157010000	99840000
GDA1	1	18	3	51.5	518	0.91028	0.79629	8066400000	4601000000	3465400000	1397600000	583080000	814560000	6668800000	4017900000	2650800000
SMF1	1	4	0	12.9	575	N/A	0.79626	658110000	400220000	257900000	0	0	0	658110000	400220000	257900000
YOR389W	3	9	0	18.9	624	N/A	0.79509	2543900000	1603300000	940680000	0	0	0	2543900000	1603300000	940680000
NOG1	1	12	3	23	647	0.84928	0.79453	2099800000	1403100000	696760000	241270000	129310000	111970000	1858500000	1273700000	584800000
PMI40	1	13	1	50.6	429	N/A	0.79164	2538900000	1614400000	924490000	28929000	13282000	15648000	2510000000	1601100000	908840000
TAF14	1	3	1	16.4	244	N/A	0.78964	724670000	439110000	285560000	64244000	31148000	33095000	660430000	407960000	252460000
VPS16	1	9	0	16.2	798	N/A	0.78953	680720000	346150000	334570000	0	0	0	680720000	346150000	334570000
GPP1	1	11	12	71.6	250	1.2314	0.78808	24033000000	12147000000	11886000000	17577000000	8030000000	9547000000	6456200000	4116700000	2339500000
UBP10	1	5	2	6.8	792	1.1489	0.78793	161790000	84722000	77067000	83443000	38565000	44878000	78347000	46157000	32189000
SMY2	1	3	1	5.8	740	1.0399	0.78493	307250000	163660000	143590000	258870000	132880000	125990000	48382000	30787000	17595000
MNN1	1	29	0	42.4	762	N/A	0.78485	22207000000	13926000000	8281000000	0	0	0	22207000000	13926000000	8281000000
RPL29	1	3	1	47.5	59	0.94383	0.78259	44707000	24498000	20209000	36663000	19783000	16880000	8043500	4714700	3328800
CSH1	1	3	0	13.8	376	N/A	0.78246	299330000	182430000	116900000	0	0	0	299330000	182430000	116900000
HYP2	1	5	5	72	157	0.94268	0.78221	32208000000	16860000000	15348000000	28722000000	14726000000	13997000000	3485600000	2134500000	1351000000
ROK1	1	6	0	20.6	564	N/A	0.78219	111410000	73138000	38275000	0	0	0	111410000	73138000	38275000
GLO3	1	9	5	32	493	1.0019	0.78048	2456100000	1322400000	1133700000	2176600000	1130700000	1045900000	279510000	191730000	87779000
VOA1	1	4	0	13.2	265	N/A	0.77961	12845000000	7990800000	4854700000	0	0	0	12845000000	7990800000	4854700000
PAA1	1	2	0	15.7	191	N/A	0.77903	63886000	39585000	24301000	0	0	0	63886000	39585000	24301000
RNA1	1	6	5	21.1	407	1.0015	0.7783	1299700000	620600000	679110000	876440000	415860000	460580000	423270000	204740000	218530000
TAH11	1	2	0	4.1	604	N/A	0.77765	41093000	24785000	16307000	0	0	0	41093000	24785000	16307000
HIS7	1	14	4	38.4	552	1.0264	0.77626	1412600000	784300000	628340000	795890000	403730000	392160000	616750000	380570000	236180000
QRI1	1	12	2	27.5	477	N/A	0.77586	1809600000	1479600000	329950000	0	0	0	1809600000	1479600000	329950000
POL1	1	4	1	3.1	1468	N/A	0.77541	219170000	103650000	115520000	156510000	72465000	84046000	62661000	31185000	31477000
GLT1	1	18	3	11.9	2145	0.91805	0.77505	4908300000	1526000000	3382400000	1529300000	828370000	700920000	3379100000	697580000	2681500000
ASF1	1	2	1	7.9	279	N/A	0.77448	273440000	150720000	122730000	210180000	111110000	99073000	63259000	39606000	23653000
TUP1	1	8	4	18.2	713	0.97412	0.77164	1951500000	1049900000	901560000	1545000000	802390000	742650000	406470000	247550000	158920000
TMA7	1	3	2	40.6	64	1.0136	0.77164	2197900000	1149200000	1048700000	1773200000	873590000	899640000	424670000	275570000	149100000
COF1	1	4	2	41.3	143	1.1149	0.77083	8933500000	4333300000	4600100000	8534900000	4078300000	4456600000	398570000	255000000	143560000
FUR1	1	4	1	30.1	216	1.122	0.77007	734670000	420740000	313930000	372940000	180940000	192000000	361730000	239800000	121930000
THR4	1	27	7	63.6	514	1.018	0.76927	11241000000	6979500000	4261800000	1380500000	689160000	691340000	9860800000	6290300000	3570400000
INP53	1	4	1	5	1107	N/A	0.76914	375380000	202160000	173220000	299380000	156020000	143350000	76000000	46137000	29863000
SAM4	2	4	1	16.9	325	1.033	0.7665	857190000	400010000	457190000	354240000	161770000	192460000	502950000	238230000	264720000
FRD1	1	6	0	18.7	470	N/A	0.76587	401970000	256020000	145950000	0	0	0	401970000	256020000	145950000
PGM1	1	6	1	19.8	570	1.0842	0.76349	1233800000	687360000	546460000	479200000	233930000	245270000	754620000	453440000	301190000
PXR1	1	4	1	18.5	271	N/A	0.76147	163950000	104700000	59252000	0	0	0	163950000	104700000	59252000
TKL1	1	23	5	52.2	680	1.0489	0.7604	23342000000	14061000000	9281000000	2616600000	1321100000	1295400000	20726000000	12740000000	7985500000
HMT1	1	6	0	18.4	348	N/A	0.7586	223760000	144350000	79412000	0	0	0	223760000	144350000	79412000
UBC4	1	1	0	6.8	148	N/A	0.75529	398420000	260140000	138280000	0	0	0	398420000	260140000	138280000
GCS1	1	4	2	17.3	352	1.0681	0.75485	725870000	351240000	374630000	677850000	323740000	354100000	48023000	27494000	20529000
RPS31;UBI4	2	3	4	60.5	152	0.96372	0.75446	60132000000	37727000000	22404000000	2837300000	1277100000	1560100000	57294000000	36450000000	20844000000
FIG4	1	3	0	5.9	879	N/A	0.74983	195200000	132030000	63172000	0	0	0	195200000	132030000	63172000
HIS4	1	7	2	10.5	799	N/A	0.74847	307050000	191780000	115270000	21243000	12243000	8999900	285810000	179540000	106270000
TIF11	1	4	3	25.5	153	0.9812	0.74794	1476400000	845400000	630990000	761820000	414000000	347820000	714570000	431400000	283170000
NOP56	1	23	6	66.7	504	0.9565	0.74697	8983600000	5427600000	3556000000	2011800000	998270000	1013500000	6971800000	4429300000	2542500000
YPR147C	1	4	0	17.4	304	N/A	0.74485	435780000	277810000	157970000	0	0	0	435780000	277810000	157970000
RTN2	1	5	0	24.9	393	N/A	0.74075	288830000	196070000	92755000	0	0	0	288830000	196070000	92755000
GLO2	1	5	1	22.3	274	N/A	0.74028	394470000	230970000	163500000	47655000	19450000	28206000	346810000	211520000	135290000
PUF3	1	4	1	5.2	879	1.1107	0.73852	294710000	144400000	150310000	226120000	105620000	120500000	68587000	38776000	29811000
Glucose-6-phosphate 1-epimerase	1	6	3	27.6	297	1.1457	0.73715	1437400000	782410000	654980000	755360000	336250000	419110000	682030000	446160000	235870000
IMP4	1	2	1	7.6	290	N/A	0.73376	154600000	90781000	63816000	76127000	40534000	35593000	78469000	50247000	28222000
SOF1	1	6	0	26.6	489	N/A	0.72903	182790000	122380000	60412000	0	0	0	182790000	122380000	60412000
AAH1	1	5	2	16.4	347	N/A	0.72627	367490000	189180000	178310000	240670000	115870000	124800000	126820000	73313000	53506000
ADO1	1	12	5	62.6	340	1.0457	0.72057	5202700000	2618900000	2583900000	3410200000	1497200000	1913000000	1792500000	1121600000	670890000
Uncharacterized protein YLR179C	1	6	2	50.7	201	0.89103	0.71758	3919200000	2223200000	1696000000	3348200000	1855500000	1492700000	570960000	367650000	203310000
SOD1	1	8	6	60.4	154	1.1646	0.7147	4830400000	2287000000	2543400000	4568900000	2116700000	2452200000	261490000	170320000	91167000
BXI1	1	2	1	17.5	297	N/A	0.71042	224230000	98919000	125320000	125700000	39888000	85817000	98530000	59031000	39499000
ARL1	1	2	0	12	183	N/A	0.70504	77850000	50434000	27415000	0	0	0	77850000	50434000	27415000
HXK1	1	14	1	53.2	485	N/A	0.70121	2793400000	1617500000	1175900000	0	0	0	2793400000	1617500000	1175900000
CPR8	1	10	0	46.4	308	N/A	0.69932	3313200000	2166000000	1147200000	0	0	0	3313200000	2166000000	1147200000
YHB1	1	15	5	56.6	399	0.89216	0.69929	13264000000	8012400000	5251100000	5743400000	3022500000	2720900000	7520100000	4989900000	2530200000
GUK1	1	9	4	58.3	187	1.0129	0.69863	5431900000	3144600000	2287300000	2336700000	1191300000	1145400000	3095300000	1953300000	1141900000
RGI1	1	2	0	18.6	161	N/A	0.69815	121780000	81350000	40433000	0	0	0	121780000	81350000	40433000
WHI2	1	2	0	7.8	486	N/A	0.69782	93919000	63976000	29942000	0	0	0	93919000	63976000	29942000
BDH1	1	2	0	5.5	382	N/A	0.69638	62696000	39303000	23394000	0	0	0	62696000	39303000	23394000
MMM1	1	2	0	6.1	426	N/A	0.69398	49929000	29317000	20613000	0	0	0	49929000	29317000	20613000
HDA1	1	3	0	6.2	706	N/A	0.68948	78764000	48452000	30312000	0	0	0	78764000	48452000	30312000
DOG2;DOG1	2	2	0	9.3	246	N/A	0.68826	81708000	45319000	36389000	0	0	0	81708000	45319000	36389000
Uncharacterized phosphatase YNL010W	1	12	3	53.5	241	0.98213	0.68088	1287800000	811130000	476710000	266170000	127670000	138500000	1021700000	683470000	338210000
PGM2	1	6	0	21.6	569	N/A	0.67048	371530000	237060000	134470000	0	0	0	371530000	237060000	134470000
SCH9	1	3	0	7.2	824	N/A	0.66494	65454000	39770000	25684000	0	0	0	65454000	39770000	25684000
SSA4	1	7	5	32.4	642	N/A	0.66345	692330000	474840000	217490000	0	0	0	692330000	474840000	217490000
OXP1	1	3	0	4.4	1286	N/A	0.65859	48446000	31311000	17135000	0	0	0	48446000	31311000	17135000
ATG27	1	13	2	55.7	271	0.94972	0.65563	8109700000	5434900000	2674800000	192000000	106450000	85544000	7917700000	5328500000	2589200000
HEM13	1	2	0	8.5	328	N/A	0.63588	54101000	34899000	19201000	0	0	0	54101000	34899000	19201000
SQT1	1	3	1	10.9	431	N/A	0.62726	23658000	16968000	6690100	0	0	0	23658000	16968000	6690100
GRX6	1	7	2	44.6	231	0.73436	0.60238	1059500000	692660000	366830000	258820000	154530000	104300000	800660000	538140000	262530000
NSA1	1	3	1	7.6	463	N/A	0.59463	59929000	42018000	17911000	0	0	0	59929000	42018000	17911000
BMH1	1	3	6	48.3	267	1.6802	0.58266	1557800000	707320000	850500000	1311200000	535170000	776060000	246590000	172140000	74442000
Uncharacterized protein YJR061W	1	7	0	8.8	935	N/A	0.56345	118730000	86689000	32045000	0	0	0	118730000	86689000	32045000
SLK19	1	2	1	3.3	821	N/A	0.56063	231280000	154220000	77058000	47344000	27793000	19551000	183930000	126430000	57507000
RPO31	1	5	3	5	1460	1.0846	0.55535	331120000	172940000	158180000	259000000	130980000	128030000	72119000	41966000	30153000
FOL1	1	2	0	2.7	824	N/A	0.55218	64928000	42716000	22212000	0	0	0	64928000	42716000	22212000
TPK3;TPK1	3	3	0	9.5	398	N/A	0.53121	100950000	62535000	38416000	0	0	0	100950000	62535000	38416000
PRS3	1	3	1	17.8	320	1.0053	0.47184	1147900000	800540000	347350000	577930000	298460000	279470000	569960000	502080000	67882000
KSP1	1	1	0	1.7	1029	N/A	0.44639	307090000	267630000	39466000	0	0	0	307090000	267630000	39466000
HXT4	1	4	1	13.5	576	N/A	0.39052	281690000	193290000	88391000	120070000	83727000	36340000	161620000	109570000	52051000
HXT7;HXT6	2	2	0	6.8	570	N/A	0.31626	108330000	82727000	25605000	0	0	0	108330000	82727000	25605000
TPD3	1	4	3	10.7	635	1.0373	0.29203	3050200000	1629800000	1420400000	2762400000	1372700000	1389600000	287850000	257090000	30766000
HAL5	1	3	1	5	855	1.5591	0.087218	449880000	217990000	231900000	368660000	145000000	223660000	81225000	72983000	8242500
