# Supplementary material for: A systematic approach to identify recycling endocytic cargo depending on the GARP complex
Source: eLife. 2019 Jan 29;8:e42837. doi: 10.7554/eLife.42837 (PMC6374077; doi:10.7554/eLife.42837)
Supplement: Figure 4—source data 4. [file elife-42837-fig4-data4.xlsx]

## Sheet: APL1D
Gene.names	Number.of.proteins	Peptides	Unique.peptides	Sequence.coverage....	Ratio.H.L.normalized.Apl1	Intensity.Apl1	Intensity.L.Apl1	Intensity.H.Apl1
EFB1	1	3	3	33	0.1245	31854000	30500000	1353800
RAP1	1	2	2	4.8	0.16879	5017800	3572600	1445200
Uncharacterized protein YLR179C	1	3	3	21.9	0.26149	7323900	5641200	1682700
ADE13	1	2	2	6.4	0.26816	9230000	7953800	1276200
EFR3	1	2	2	3.2	0.31879	17021000	13281000	3739900
URA1	1	3	3	7.6	0.40645	42098000	33966000	8131500
CHS1	1	10	10	11.3	0.44082	29764000	19865000	9898800
MTG2	1	2	2	11.8	0.45486	1193700	893620	300120
FAR3	1	2	2	14.2	0.50072	3776100	2745900	1030200
FLC2	1	4	4	6.9	0.54555	17130000	11007000	6123600
TCD1	1	2	2	4.4	0.65034	121210000	67251000	53961000
ECM32	1	2	2	4.1	0.65589	5171500	3381200	1790200
CWP1	1	8	8	34.7	0.65765	216440000	137080000	79365000
COQ8	1	2	2	9	0.68023	15131000	10265000	4866000
YPK2	1	2	2	4.6	0.69851	3908700	2667000	1241700
ALG9	1	3	3	5.9	0.70032	11693000	6977700	4715600
PST1	1	4	4	12.4	0.70177	7778600	4549300	3229300
BCS1	1	3	3	10.7	0.7064	11345000	7108200	4236800
AIM22	1	2	2	6.1	0.70648	3996900	2373000	1623900
MRPL19	1	1	1	13.3	0.70956	5962800	3547600	2415200
NAT3	1	3	3	14.4	0.70965	18764000	10915000	7848600
UGA1	1	2	2	12.7	0.71348	3913100	2429600	1483400
ERB1	1	2	2	4.8	0.71398	4889800	2846100	2043700
NDC80	1	2	2	3	0.71884	80119000	58623000	21497000
AIM17	1	4	4	12.7	0.73909	9778000	5923600	3854400
CCZ1	1	2	2	3.3	0.7394	6847200	4415600	2431600
KTR7	1	2	2	6.4	0.74352	11117000	7131000	3986000
NOP58	1	13	11	35	0.7463	217820000	129380000	88438000
MRPL6	1	2	2	10.3	0.74975	8779000	5379100	3399900
GCV1	1	6	6	14	0.75513	34059000	19500000	14559000
SPT5	1	2	2	3.5	0.75642	4446300	2788900	1657400
RPA34	1	2	2	7.3	0.76109	5271000	2988800	2282300
TPD3	1	2	2	4.7	0.76216	2212900	1233000	979930
FRE1	1	2	2	3.2	0.7665	29765000	15344000	14421000
CBF5	1	7	7	19.5	0.76802	99382000	56443000	42938000
TIM11	1	2	2	38.5	0.7681	25226000	15856000	9369600
MAE1	1	7	7	10.2	0.77501	180750000	106420000	74334000
JJJ1	1	3	3	8.8	0.7752	25664000	17090000	8574000
FZO1	1	2	2	2.1	0.7763	6270800	3763200	2507700
SIP3	1	4	4	3.8	0.77644	29992000	15620000	14373000
YGR026W	1	4	4	12.6	0.77774	29911000	18269000	11642000
MIC12	1	2	2	28.3	0.77989	45099000	26089000	19010000
MRPS28	1	4	4	11.2	0.78112	17212000	9943200	7268800
YPR114W	1	2	2	7	0.78365	4968300	2760000	2208300
MRPL7	1	3	3	15.1	0.78568	58995000	34498000	24497000
YSP1	1	7	7	6.9	0.78653	20859000	11765000	9094600
AAT1	1	4	4	10	0.78978	12198000	6971400	5226100
TIM21	1	3	3	17.6	0.7923	2801100	1611900	1189200
EMC6	1	2	2	19.4	0.79672	4088100	2297300	1790900
LEU2	1	2	2	9.1	0.79773	6471900	4219000	2252900
RPO31	1	2	2	2	0.79813	2226900	1222200	1004700
OMS1	1	4	4	11.5	0.79892	21236000	14450000	6786100
Probable phospholipase YOR022C, mitochondrial	1	2	2	5.5	0.79923	7728800	4250300	3478500
MPS3	1	3	3	4.5	0.80014	16238000	9436700	6801500
PET54	1	3	3	14	0.80515	11617000	8549800	3067600
COX13	1	3	3	34.1	0.80516	8811700	5149600	3662100
GPI11	1	3	3	14.6	0.80647	36879000	19274000	17605000
KTR1	1	6	6	20.4	0.80658	37251000	19700000	17551000
MIC19	1	3	3	15.9	0.8071	28648000	16735000	11913000
YGR012W	1	5	5	18.8	0.81105	41648000	20781000	20867000
YMC2	1	2	2	12.5	0.81283	3321000	1944800	1376200
GCV3	1	1	1	12.4	0.81459	7163900	4350900	2813100
SAM50	1	3	3	10.1	0.81459	7349000	4008100	3341000
MTF2	1	5	5	12.7	0.81491	18679000	10197000	8481900
PUS4	1	2	2	7.4	0.81761	2444200	1331000	1113200
FPR2	1	2	2	17.8	0.82029	14270000	8592500	5677100
RSM26	1	2	2	11.7	0.82037	10288000	5286100	5001600
RSM10	1	3	3	13.8	0.82049	26398000	14984000	11413000
RPL22A	2	4	4	65.3	0.82067	24816000	13517000	11299000
COX9	1	1	1	15.3	0.82176	7722200	4260000	3462200
CCM1	1	2	2	4.6	0.82282	13355000	7251900	6102900
MRP4	1	4	4	16.2	0.8229	55830000	31252000	24578000
OM14	1	3	3	26.1	0.82446	22115000	9525700	12589000
CBP6	1	2	2	15.4	0.82639	22607000	12394000	10213000
RCF1	1	2	2	16.4	0.82682	13049000	7682800	5366100
Uncharacterized protein YJR003C, mitochondrial	1	2	2	4.2	0.82794	12377000	6335800	6041600
IMO32	1	2	2	11.4	0.8291	3161300	1750400	1411000
FMC1	1	2	2	24.5	0.83055	13306000	7788300	5517900
ARH1	1	4	4	9.1	0.83055	10675000	5770700	4904600
YHR080C	1	5	5	5.7	0.83056	17881000	10576000	7305100
MRT4	1	4	4	17.8	0.83285	11396000	5938000	5457900
ERG24	1	3	3	6.2	0.83297	28252000	15045000	13207000
SPC1	1	4	4	40.4	0.83297	44766000	24106000	20661000
TGL3	1	3	3	6.9	0.83484	5397000	3276700	2120300
EPS1	1	5	5	6.3	0.83585	9392900	5453300	3939700
POR1	1	11	11	54.4	0.83718	1720500000	980790000	739670000
MRPS9	1	4	4	24.1	0.83738	15793000	9092700	6700600
YMC1	1	2	2	16	0.83757	22427000	12134000	10293000
ELO3	1	4	4	13.3	0.83916	268890000	150400000	118490000
MRPL36	1	2	2	15.8	0.83941	10196000	6088600	4107800
SBH1	1	3	3	30.5	0.83948	922490000	527270000	395220000
NAT2	1	2	2	6.6	0.83974	17299000	9890200	7409100
RSM23	1	9	9	19.6	0.84113	54991000	31470000	23521000
MRPL51	1	3	3	35	0.84144	74845000	42211000	32634000
MSC6	1	10	10	18.4	0.84257	66028000	24767000	41260000
IFM1	1	7	7	14.8	0.84285	28739000	16001000	12739000
MRPL23	1	2	2	16	0.84367	24002000	14069000	9933100
UGO1	1	2	2	3.8	0.84437	12925000	7051800	5873200
COX20	1	2	2	10.2	0.84447	5664600	3394900	2269700
ARG5,6	1	6	6	10.7	0.84458	17356000	10546000	6810600
LYS20;LYS21	2	2	2	8.4	0.84472	3765500	2154600	1610800
QCR7	1	3	3	37.8	0.8448	46887000	26053000	20834000
GPI13	1	4	4	6.4	0.8449	24923000	13069000	11855000
YDR476C	1	3	3	20.5	0.84502	27839000	15260000	12579000
SSP120	1	1	1	6	0.84578	10267000	5856500	4410400
TOM70	1	6	6	7.3	0.84586	188790000	113220000	75568000
ACO2	1	15	13	27.9	0.84659	128620000	72992000	55624000
YPT6	1	2	2	11.2	0.847	14412000	8590700	5821600
BAT1	1	10	10	51.4	0.84812	159570000	93041000	66526000
CDC10	1	5	5	21.4	0.84886	39025000	21959000	17065000
MRPL31	1	2	2	18.3	0.84889	10029000	5970400	4059000
CIT1	1	11	10	25.9	0.84982	191110000	109490000	81622000
MRPL24	1	4	4	18.6	0.85041	26284000	15323000	10961000
GCV2	1	3	3	5	0.85058	16328000	8962300	7365400
ALD4	1	27	24	59.5	0.85068	679070000	391980000	287090000
EMC3	1	1	1	4	0.85131	163740000	92903000	70841000
PDX1	1	16	16	55.9	0.8518	265360000	150360000	115000000
AIM36	1	4	4	21.6	0.85227	27511000	15198000	12313000
MGR2	1	1	1	15	0.85258	5412400	2640300	2772000
Uncharacterized protein YMR209C	1	6	6	16.2	0.85371	40578000	22673000	17905000
JEM1	1	8	8	17.1	0.85455	53391000	29874000	23517000
HEM1	1	7	7	17	0.85505	88527000	51124000	37403000
TRX3	1	2	2	18.1	0.85601	10793000	5584900	5207700
PAM18	1	4	4	23.8	0.85622	63023000	36026000	26996000
BIG1	1	3	3	14	0.85667	20992000	9731500	11261000
MGM1	1	9	9	15.1	0.8573	30847000	17318000	13529000
YME1	1	8	8	16.9	0.85825	149200000	87829000	61375000
ATP7	1	7	7	58	0.85893	61833000	34876000	26957000
LYS4	1	16	16	31.2	0.85894	141250000	78272000	62979000
KTR3	1	4	4	10.9	0.85902	121430000	68339000	53095000
MMF1	1	6	6	58.6	0.8602	201780000	114760000	87018000
YME2	1	8	8	14	0.8603	92157000	32928000	59230000
IDH2	1	6	6	26	0.86117	512610000	295330000	217280000
ORM1	1	2	2	16.7	0.8612	8706300	4732600	3973600
GUA1	1	5	5	13.3	0.86129	47707000	27185000	20521000
TSC13	1	6	6	12.9	0.86141	302750000	201040000	101710000
GPI17	1	3	3	5.4	0.8619	45543000	25511000	20031000
YPR063C	1	4	4	34.3	0.86238	63419000	35967000	27453000
RSM22	1	6	6	15.6	0.86266	26476000	14991000	11485000
DNF3	1	2	2	1.8	0.86268	4091200	2468400	1622700
SIL1	1	8	8	26.1	0.8643	49497000	27187000	22310000
ATP2	1	14	14	40.7	0.8645	795310000	447940000	347370000
PKR1	1	3	3	35.2	0.86504	264310000	149780000	114530000
NOP2	1	4	4	11.5	0.86541	7587400	4311700	3275700
HSP78	1	23	23	36.6	0.86572	410670000	236270000	174400000
NOP10	1	2	2	27.6	0.866	36822000	21537000	15285000
NOP56	1	20	18	52.2	0.86605	438090000	251700000	186390000
RSM7	1	5	5	21.9	0.86705	37909000	21218000	16691000
ERG25	1	2	2	7.1	0.86711	32839000	18380000	14458000
MRH4	1	7	7	20.9	0.86809	37373000	21144000	16228000
YLH47	1	4	4	12.6	0.86815	99698000	55294000	44404000
RRF1	1	8	8	40.9	0.86828	93848000	49538000	44310000
STT3	1	2	2	3.8	0.86858	34495000	18953000	15542000
RPL24B	1	9	1	45.2	0.86861	29534000	14876000	14659000
LEU9	1	9	7	26.5	0.869	137920000	76625000	61299000
NIT3	1	4	4	19.9	0.86921	18221000	10364000	7856500
ILV5	1	16	16	45.6	0.86991	10402000000	5816300000	4585400000
Vacuolar membrane protein YNL058C	1	4	4	20.9	0.87008	28134000	16511000	11623000
NOG2	1	4	4	9.9	0.87056	4952900	2825900	2127000
UFD1	1	2	2	7.2	0.87089	27974000	15495000	12480000
YML6	1	5	5	21.3	0.87104	14927000	8271800	6655000
AIM10	1	6	6	16.5	0.8711	12343000	6766500	5576400
KAR2	1	41	40	50.7	0.87139	26017000000	14673000000	11344000000
PPA2	1	3	3	11.9	0.87147	15989000	8285700	7703500
RMD9	1	5	5	10.8	0.87154	30760000	17040000	13720000
TUF1	1	9	9	33.6	0.8724	508370000	289840000	218530000
MDM38	1	14	14	30.7	0.87246	620830000	358200000	262630000
MRPS35	1	9	9	42.9	0.87341	68453000	38715000	29737000
IDH1	1	13	13	57.5	0.87348	640750000	364770000	275980000
SNL1	1	5	5	43.4	0.87353	110240000	62076000	48165000
PIM1	1	27	27	31.5	0.87416	324820000	180830000	143990000
FSF1	1	4	4	14.4	0.8746	62404000	35323000	27081000
HMG2	1	8	5	11.3	0.87476	48321000	29603000	18718000
YHM2	1	4	4	19.7	0.8765	142110000	75618000	66494000
TOM40	1	6	6	30.5	0.87676	225300000	129000000	96298000
HSP42	1	4	4	17.6	0.87742	43546000	22875000	20670000
SHR3	1	2	2	9	0.87746	135890000	82322000	53567000
IFA38	1	6	6	18.4	0.87748	104610000	59648000	44962000
MRPL11	1	6	6	25.7	0.87778	57794000	32856000	24938000
IZH2	1	2	2	5.7	0.8779	22000000	13056000	8944300
SSA4	2	9	4	18.8	0.87814	137930000	74331000	63596000
FMP10	1	3	3	15.6	0.87838	36408000	19552000	16856000
AIM41	1	3	3	22.2	0.87876	25358000	14140000	11218000
CYM1	1	14	14	17.7	0.87904	272030000	151670000	120350000
QCR2	1	12	12	48.6	0.87953	600500000	339040000	261460000
NPL4	1	4	4	7.4	0.87957	19148000	12251000	6896700
PAM17	1	1	1	12.7	0.87988	15546000	8214200	7331500
HSP60	1	31	31	66.3	0.88005	10367000000	5923100000	4443500000
PET9	2	8	8	23.9	0.88032	598270000	339340000	258930000
ATP3	1	8	8	33.8	0.88038	153030000	89036000	63993000
SSQ1	1	11	11	27.5	0.88051	119170000	68388000	50786000
SDH2	1	2	2	9	0.88074	15233000	8260700	6972600
Uncharacterized ABC transporter ATP-binding protein YDR061W	1	4	4	8.7	0.88122	11311000	5654700	5656700
MHR1	1	3	3	18.1	0.88133	25051000	13645000	11405000
YLR290C	1	3	3	10.8	0.88165	14180000	8365300	5814900
OST5	1	2	2	9.3	0.88202	61798000	36002000	25796000
CIR1	1	10	10	43.3	0.8821	148730000	85712000	63020000
CNE1	1	6	6	17.1	0.88231	24436000	13970000	10466000
IST2	1	16	16	20.5	0.88239	298460000	166470000	131990000
DGR2	1	4	4	7.2	0.88249	9695300	5167700	4527700
ERO1	1	12	12	24	0.88257	329450000	178240000	151220000
COX5B	2	3	3	27.8	0.88341	21805000	12235000	9570500
MRPL13	1	7	7	45.1	0.88377	87976000	48772000	39204000
RSM25	1	2	2	11.4	0.88441	50145000	26567000	23578000
TIM54	1	10	10	28.9	0.88475	59379000	33334000	26045000
CPR5	1	12	12	55.1	0.88543	1169800000	656170000	513580000
SPS19	1	5	5	20.5	0.88586	104050000	57753000	46299000
TIM44	1	10	10	27.8	0.8863	219670000	123440000	96233000
NAM9	1	6	6	11.1	0.88653	60006000	34016000	25990000
SSC1	2	32	32	66.2	0.8866	14073000000	7913300000	6160000000
ILV1	1	14	14	32.1	0.88711	322850000	175340000	147510000
LEU4	1	7	5	13.7	0.88725	222330000	127030000	95307000
TOM22	1	2	2	29.6	0.88733	31447000	17166000	14281000
OST2	1	2	2	20	0.88751	64739000	35831000	28908000
NSG1	1	3	3	12	0.88779	27076000	16008000	11068000
PCS60	1	12	12	28.4	0.88781	528900000	297630000	231260000
OLE1	1	16	16	34.1	0.88799	1032200000	579330000	452910000
MAS1	1	7	7	22.3	0.88837	117420000	63742000	53675000
MCX1	1	8	8	17.9	0.88898	359390000	182930000	176460000
NNF2	1	10	10	11.9	0.88909	71963000	40585000	31378000
SWP1	1	7	7	24.5	0.88909	315390000	176330000	139060000
FUM1	1	9	9	25.4	0.88958	157950000	88936000	69018000
PNC1	1	5	5	42.1	0.89072	291290000	162680000	128610000
ALG5	1	3	3	10.5	0.89105	21515000	11250000	10265000
TOP2	1	7	7	7.6	0.89126	13760000	7693500	6066800
IVY1	1	6	6	26.3	0.89156	121220000	69159000	52064000
MDH1	1	10	10	44.3	0.89162	430520000	244540000	185980000
OST3	1	3	3	10.3	0.89177	76949000	43138000	33811000
QCR10	1	2	2	26	0.89181	17445000	9706900	7738500
CYB5	1	6	6	70.8	0.89191	680840000	386900000	293940000
MIS1	1	26	26	33.3	0.89232	594750000	331400000	263350000
NUP116	1	3	3	4.2	0.89236	11339000	5965200	5373500
YSP2	1	19	19	18.6	0.89272	218440000	121670000	96768000
PHB2	1	7	7	22.6	0.89283	303340000	170240000	133100000
RSM28	1	8	8	27.1	0.89304	66292000	36268000	30024000
LSC2	1	18	18	50.4	0.89306	440680000	249910000	190770000
SCO1	1	3	3	15.3	0.89309	36965000	19792000	17173000
CCW14	1	3	3	18.1	0.89324	15544000	8519200	7024400
SMF1	1	5	5	11.3	0.89328	42211000	23431000	18780000
RIM1	1	4	4	51.9	0.89329	213420000	121710000	91704000
MMM1	1	4	4	14.8	0.89347	24587000	14165000	10423000
KGD1	1	17	17	23.6	0.89388	391450000	208420000	183040000
RPC82	1	3	3	9.8	0.89388	8201500	3694000	4507400
ACO1	1	35	33	53	0.89395	3776400000	2129200000	1647200000
LAT1	1	14	14	31.1	0.89431	1704600000	950800000	753850000
PET123	1	9	9	38.7	0.89483	118620000	68288000	50334000
TRM1	1	14	14	33	0.89488	312190000	169860000	142330000
PMT3	1	4	4	7.6	0.895	37996000	21519000	16477000
MRPL49	1	3	3	31.7	0.89527	15121000	8292700	6828300
UBC6	1	2	2	14.8	0.8956	64924000	36232000	28691000
MPD1	1	8	8	19.2	0.89637	216950000	119850000	97092000
FMP27	1	14	14	6.5	0.89663	93115000	52211000	40904000
ATP4	1	8	8	35.7	0.89693	176400000	100450000	75949000
KRE5	1	27	27	23.1	0.89713	181170000	96908000	84266000
CCT6	1	3	3	4.9	0.8973	5359600	2750300	2609200
MGM101	1	4	4	24.5	0.89754	69142000	38035000	31108000
MAS2	1	9	9	23.7	0.8977	211130000	125050000	86084000
ZRG17	1	2	2	4	0.89779	3497500	1907400	1590000
PUT2	1	11	11	27	0.89795	75055000	35533000	39522000
BRX1	1	2	2	10.7	0.89831	39645000	22596000	17049000
NDE1	1	15	15	31.2	0.89853	651240000	370000000	281240000
HOC1	1	5	5	19.9	0.89856	24066000	13444000	10623000
INO80	1	3	3	3.1	0.89893	52881000	28087000	24794000
ATO2	1	3	3	18.4	0.89928	9023900	4613000	4410900
ATP1	1	14	14	42.4	0.89936	2147200000	1218700000	928520000
IRC22	1	2	2	5.8	0.89966	237260000	135520000	101750000
SED4	1	4	4	6.2	0.89988	27328000	15376000	11952000
LHS1	1	23	23	31.2	0.90001	2218700000	1226400000	992330000
GET2	1	2	2	15.4	0.90027	10857000	5823000	5034100
MIA40	1	7	7	26.1	0.90087	156820000	84380000	72445000
ATP5	1	8	8	49.5	0.90113	168910000	92396000	76513000
MDL2	1	3	3	6.5	0.90114	12607000	7322500	5284000
AIM24	1	4	4	15.5	0.90122	11809000	6673800	5134900
MRPS17	1	4	4	25.7	0.90151	18266000	10581000	7684400
AIM9	1	19	19	33.3	0.90175	307920000	173990000	133930000
ABF2	1	13	13	62.8	0.90186	922750000	519230000	403520000
PHB1	1	10	10	54	0.90255	400950000	222010000	178940000
ETR1	1	9	9	43.9	0.90256	82831000	47362000	35469000
HMG1	1	23	20	23.9	0.90265	600310000	338020000	262290000
MGE1	1	10	10	49.6	0.90265	319220000	177620000	141600000
SEC62	1	8	8	36.9	0.9028	491340000	276440000	214890000
EUG1	1	12	12	28.6	0.90281	1168100000	650330000	517810000
ALG2	1	8	8	24.7	0.90326	87431000	48844000	38587000
IDP1	2	17	17	53.5	0.90329	537660000	303460000	234210000
MIC60	1	13	13	24.4	0.90332	197000000	116960000	80032000
HSP10	1	5	5	74.5	0.90347	896030000	504890000	391140000
RSM24	1	5	5	23.5	0.9035	92368000	49103000	43265000
SHM1	1	19	19	50.8	0.90398	490970000	273980000	217000000
LPD1	1	25	25	58.9	0.90453	1007500000	555900000	451620000
SEC11	1	2	2	9.6	0.9049	20467000	10816000	9651000
CHO2	1	14	14	19.7	0.90494	625600000	372360000	253230000
MRPL17	1	6	6	26	0.90499	29120000	16599000	12521000
OSM1	1	8	8	25	0.90517	84366000	45658000	38708000
SCY1	1	2	2	3.4	0.90534	6181600	3213300	2968300
ILV2	1	16	16	37	0.9056	1025600000	570490000	455110000
MIR1	1	7	7	37.6	0.90576	128100000	71022000	57076000
POM34	1	6	6	32.1	0.90632	46397000	23916000	22481000
MNN11	1	4	4	14	0.90633	20990000	9197900	11793000
RIP1	1	3	3	20	0.90637	30901000	17576000	13326000
MTC5	1	4	4	4.3	0.90662	14525000	7520100	7004400
ILV3	1	22	22	49.1	0.90669	539950000	301140000	238810000
SUP35	1	11	11	20.9	0.90681	138980000	78891000	60087000
PDA1	1	11	11	29.5	0.90704	436240000	244330000	191920000
COR1	1	11	11	34.6	0.90708	416180000	237310000	178870000
HLJ1	1	2	2	9.8	0.90712	28476000	15907000	12569000
ALG12	1	5	5	8.7	0.90736	36436000	20296000	16141000
SRP40	1	3	3	10.3	0.90741	66748000	36200000	30548000
CIR2	1	19	19	41.7	0.90744	147840000	80096000	67746000
PRX1	1	6	6	29.9	0.90746	116660000	62803000	53858000
TOM71	1	8	8	14.2	0.90756	109370000	61131000	48243000
MYO2	1	20	20	15.9	0.90774	218880000	123310000	95570000
ALD5	1	16	13	33.3	0.90794	246440000	137230000	109220000
ORM2	1	2	2	12.5	0.9082	44704000	23761000	20943000
EHD3	1	4	4	8	0.90831	9278700	5268300	4010400
SEC63	1	26	26	43	0.90837	2031100000	1129400000	901710000
BNA4	1	3	3	9.3	0.90842	22774000	12466000	10308000
CBR1	1	14	14	52.5	0.90866	1370500000	757130000	613390000
AIM23	1	4	4	14	0.90883	23841000	14473000	9367600
LSC1	1	13	13	49.5	0.90896	456930000	254440000	202490000
TIM50	1	15	15	33	0.90922	306740000	174720000	132020000
MSC1	1	19	19	49.7	0.90926	503510000	283800000	219710000
NCP1	1	18	18	37.2	0.90967	777850000	425420000	352430000
ERG11	1	16	16	39.1	0.91026	1570700000	888760000	681960000
AVT4	1	2	2	5.5	0.91038	18771000	10307000	8464400
EMC2	1	5	5	15.1	0.9106	57933000	30552000	27381000
YEH1	1	4	4	10.5	0.91073	23702000	13124000	10578000
ERP5	1	2	2	21.2	0.9109	32605000	17373000	15232000
ADH3	1	13	12	43.7	0.91128	593140000	334330000	258810000
CST26	1	4	4	17.1	0.91148	25379000	13433000	11946000
MNP1	1	5	5	45.4	0.91162	38196000	21505000	16691000
PEX25	1	2	2	7.9	0.91176	71090000	36047000	35043000
SUR2	1	7	7	13.8	0.91242	378850000	211460000	167390000
SLM1	1	9	9	10.6	0.91259	217670000	124520000	93149000
ACH1	1	7	7	16.3	0.91266	93920000	52685000	41235000
OST1	1	5	5	14.3	0.91341	116530000	64477000	52054000
MRPL35	1	5	5	22.9	0.91353	32610000	17466000	15144000
ALT1	1	7	7	20.6	0.91363	78917000	46756000	32160000
ARG7	1	10	10	30.8	0.91392	131000000	72712000	58285000
LOA1	1	8	8	33.3	0.91429	268100000	149370000	118720000
MRP1	1	3	3	10.6	0.91437	27635000	16048000	11587000
LRO1	1	10	10	20.9	0.91456	571510000	335630000	235890000
MRPS18	1	3	3	21.2	0.91457	19977000	11372000	8604900
MEF1	1	13	13	21.2	0.9149	164640000	92894000	71744000
PMT4	1	11	11	12.3	0.915	171520000	95675000	75844000
PDB1	1	5	5	18.9	0.91519	476810000	263230000	213580000
MGR1	1	4	4	14.6	0.91578	23264000	13063000	10200000
SOP4	1	5	5	22.2	0.91584	131230000	73797000	57437000
SLM2	1	4	4	8.1	0.9161	9025600	4951000	4074600
PMT6	1	2	2	5	0.91642	23850000	12491000	11360000
MDJ1	1	14	14	29.2	0.9171	404940000	224230000	180700000
SPC3	1	6	6	40.2	0.91784	213710000	119320000	94393000
MRP7	1	4	4	13.5	0.91878	51289000	28923000	22366000
NDI1	1	11	11	27.9	0.91887	87040000	48132000	38908000
PEX30	1	6	6	20.7	0.91904	17813000	10374000	7439000
RIM2	1	2	2	5.3	0.91905	13550000	7724900	5825500
ALO1	1	8	8	19.6	0.91922	79596000	41497000	38099000
DLD1	1	11	11	24	0.91938	241540000	133100000	108430000
AAT2	1	20	20	62.7	0.91949	1737600000	967280000	770320000
MIC26	1	3	3	20.2	0.91984	20168000	10987000	9181100
OSH3	1	12	12	15.6	0.92001	136840000	77370000	59471000
CYC1	1	8	6	65.1	0.92004	367240000	205840000	161400000
CYC7	1	6	4	47.8	0.92016	39814000	22387000	17427000
GTB1	1	19	19	28.8	0.92052	340100000	184240000	155860000
MNN5	1	7	7	22.7	0.92054	111330000	61413000	49921000
UTP9	1	3	3	7	0.92073	98559000	51431000	47128000
TCB2	1	35	35	37.8	0.92111	926990000	511570000	415420000
SDH5	1	3	3	21.6	0.92114	16385000	9545800	6838900
COS9	1	4	4	7.9	0.92136	8284900	4310500	3974400
RVS161	1	2	2	7.9	0.92151	37233000	20136000	17097000
DNF1	1	13	10	12.1	0.92162	169870000	95469000	74398000
TCD2	1	5	5	19.2	0.92195	43375000	25240000	18135000
MRPL33	1	3	3	36	0.92204	37527000	20925000	16602000
COQ5	1	4	4	24.1	0.92205	57617000	37425000	20192000
BNA3	1	2	2	7.4	0.92215	11420000	6305500	5114400
SPC110	1	4	4	5.1	0.92227	7242300	3563500	3678900
SCS22	1	2	2	11.4	0.92231	21003000	11364000	9639200
YPR147C	1	5	5	22.7	0.92239	104870000	34193000	70680000
AIM45	1	4	4	16	0.92261	93373000	61003000	32370000
GGC1	1	2	2	5.3	0.92267	7748600	4251500	3497100
CPR2	1	2	2	12.7	0.92273	8157600	4081300	4076300
TY2B-OR2;TY2B-DR1;TY2B-GR1;TY2B-OR1;TY2B-DR2;TY2B-C;TY2B-GR2;TY2B-F;TY2B-LR1;TY2B-LR2;TY2B-B;TY2B-DR3;TY2A-DR3;TY2A-OR1;TY2A-DR1;TY2A-OR2;TY2A-DR2;TY2A-C;TY2A-GR2;TY2A-F;TY2A-LR2;TY2A-LR1;TY2A-GR1;TY2A-B	24	7	5	5.6	0.92276	24361000	13329000	11031000
SLC1	1	11	11	41.3	0.92293	521220000	291560000	229650000
HEM14	1	3	3	7.1	0.92296	5663800	2536900	3126900
MSW1	1	5	5	19	0.92314	67877000	43175000	24701000
KTR4	1	2	2	6	0.92322	7595800	4184000	3411800
SAC1	1	19	19	38.2	0.92359	1211800000	682860000	528940000
SHE3	1	5	5	15.3	0.92408	16736000	10033000	6702700
SPF1	1	35	35	37.7	0.92413	1703000000	933400000	769620000
ALG11	1	9	9	18.1	0.92438	17115000	9139600	7975800
ERG28	1	3	3	20.3	0.92446	68578000	37805000	30773000
PMT1	1	11	11	12.1	0.92453	897850000	504420000	393430000
LEM3	1	7	7	24.6	0.92467	164020000	91908000	72108000
Uncharacterized oxidoreductase YNL181W	1	8	8	11.1	0.92479	126490000	70431000	56054000
PRP43	1	5	5	7	0.92505	54035000	32579000	21456000
RDL2	1	5	5	50.3	0.92531	51862000	29540000	22323000
SOD2	1	3	3	15.9	0.92542	110320000	61819000	48499000
ERG9	1	10	10	28.2	0.92549	237580000	141860000	95718000
UBP1	1	7	7	11	0.92576	88843000	48909000	39934000
VPS45	1	1	1	2.4	0.92687	2234100	1173100	1060900
ERG3	1	7	7	20.8	0.92722	484570000	276840000	207730000
TIF4632	1	5	4	8.9	0.92722	19716000	9607400	10109000
VTH2;VTH1	2	5	4	3.8	0.92725	12653000	7738800	4914400
ALE1	1	2	2	3.4	0.92752	15064000	8273700	6790700
EMC1	1	12	12	13.2	0.92915	519950000	289290000	230660000
SPC2	1	4	4	22.5	0.92967	98525000	53793000	44732000
SEC61	1	5	5	9.8	0.92972	21295000	14979000	6316300
TCB3	1	54	54	42.4	0.93	2663400000	1479600000	1183800000
EMC5	1	2	2	12.8	0.93057	7364400	3957900	3406500
TGL5	1	2	2	4.4	0.93064	7314000	4025500	3288500
SCS7	1	9	9	31.2	0.93082	117660000	65016000	52647000
NOP15	1	2	2	7.3	0.93098	5126500	2906200	2220300
ARO4	1	3	3	10.8	0.93198	10419000	5604400	4815000
SDH1	1	10	10	23	0.9321	165500000	92501000	72997000
TSC10	1	2	2	9.7	0.93231	7941700	4223300	3718400
YTA12	1	9	7	14.1	0.93237	78684000	43459000	35225000
SEY1	1	28	28	32.3	0.9328	571890000	319060000	252830000
YOR020W-A	1	2	2	32.2	0.93293	18366000	10190000	8176200
RRP5	1	23	23	19.5	0.93302	154820000	85919000	68906000
PDI1	1	29	29	65.9	0.93313	12385000000	6875000000	5509800000
NEW1	1	2	2	3.2	0.93318	28427000	15013000	13415000
LAC1	1	3	3	8.4	0.9332	10177000	5630000	4547500
KGD2	1	4	4	16	0.93323	44126000	26164000	17962000
PTC5	1	10	10	26.7	0.93333	73483000	39862000	33621000
FPR1	1	2	2	14.9	0.93338	4705600	2330800	2374800
KTR6	1	8	8	21.1	0.93357	59417000	35105000	24312000
HEM15	1	5	5	16.5	0.93363	77453000	42559000	34894000
AHP1	1	6	6	47.7	0.93363	55681000	30400000	25281000
HRD3	1	4	4	4.8	0.93368	18513000	10653000	7859800
CAD1	1	2	2	9.5	0.93378	145460000	75345000	70113000
SSH1	1	2	2	8	0.93455	108670000	60656000	48013000
MNN1	1	6	6	8.3	0.93507	44193000	25728000	18465000
STE24	1	6	6	17.2	0.9357	101600000	56304000	45300000
MSS51	1	3	3	5.7	0.93589	20132000	10325000	9807500
ARG8	1	2	2	7.8	0.93656	4814600	2513200	2301400
AYR1	1	8	8	26.9	0.93658	269140000	147890000	121250000
IMG2	1	2	2	9.6	0.93706	11873000	6885800	4987600
MRPL3	1	5	5	16.2	0.93722	141290000	73265000	68021000
MRP13	1	6	6	18.6	0.93745	68788000	36624000	32164000
UPF0674 endoplasmic reticulum membrane protein YNR021W	1	12	12	32.9	0.93751	1543700000	847060000	696670000
PEX13	1	2	2	6.2	0.93813	54105000	29733000	24371000
MSS116	1	15	15	23.9	0.93818	289800000	161690000	128110000
SLP1	1	4	4	11.6	0.93851	10185000	5450000	4734600
ILV6	1	4	4	21	0.93912	73343000	40979000	32364000
CDC3	1	10	10	24.6	0.93916	162210000	89695000	72520000
CHS2	1	6	6	5.1	0.93934	27829000	15094000	12735000
STH1	1	2	2	2.5	0.93936	3910000	1973700	1936300
COQ1	1	4	4	8.9	0.93975	21122000	11637000	9484900
SLS1	1	2	2	4	0.93976	7179000	3961400	3217600
YPR091C	1	11	11	19	0.93999	120300000	66958000	53338000
RML2	1	2	2	6.6	0.94	5328300	1772900	3555400
OXA1	1	3	3	14.9	0.94012	10299000	5516200	4783100
USE1	1	2	2	14.7	0.94054	15634000	8497300	7136600
PTR2	1	4	3	8.7	0.94075	41580000	23083000	18497000
CKA2	1	2	2	6.8	0.941	11428000	5623500	5804700
MSD1	1	6	6	13.4	0.94121	41601000	22686000	18916000
YOS9	1	3	3	9.2	0.94137	46404000	23766000	22638000
ERP2	1	4	3	27.9	0.94148	137700000	72613000	65085000
LYS12	1	8	8	29.4	0.94191	294040000	165160000	128880000
SEA4	1	12	12	19.8	0.94193	61161000	33591000	27570000
SEC22	1	3	3	14.5	0.94222	36967000	21019000	15948000
MRPL40	1	6	6	26.9	0.94252	96288000	55455000	40833000
EPT1	1	2	2	6.1	0.94315	32906000	17352000	15554000
NIP1	1	2	2	2.6	0.94345	4849600	2679800	2169900
ALR1	2	5	5	7.1	0.94363	14747000	7433400	7313600
CYT2	1	2	2	12.5	0.94381	5424700	2878100	2546600
TED1	1	7	7	16.5	0.94394	194800000	120610000	74184000
ERG1	1	8	8	21	0.94492	819540000	447120000	372420000
MRPL10	1	4	4	14.3	0.94554	75784000	41872000	33913000
SHE10	1	18	18	29.8	0.94566	715910000	385220000	330690000
VMA22	1	3	3	20.4	0.946	32006000	18007000	13999000
CRH1	1	5	5	11	0.946	53621000	30520000	23101000
PMR1	1	5	5	6.2	0.94619	11929000	6222100	5707100
RPG1	1	7	7	8.1	0.94629	48429000	27193000	21236000
LIP5	1	4	4	13.3	0.94631	15873000	9557100	6315700
MRD1	1	4	4	6.1	0.94652	21143000	7904700	13239000
LAS21	1	2	2	3.7	0.94654	9745800	5680000	4065800
DPL1	1	9	9	19.7	0.94681	120920000	62920000	57998000
SCJ1	1	9	9	24.9	0.94684	575310000	315950000	259350000
OM45	1	4	4	10.9	0.94706	88019000	50154000	37865000
PHO88	1	14	14	56.9	0.94715	4614700000	2554400000	2060200000
PHO86	1	3	3	12.9	0.94732	29915000	16659000	13256000
ERG4	1	5	5	6.8	0.94743	122810000	69155000	53659000
TIM23	1	2	2	14	0.94837	10474000	5778400	4695800
Uncharacterized protein YMR134W	1	5	5	27	0.94844	140200000	79017000	61185000
CBP3	1	7	7	25.7	0.94882	57543000	34160000	23383000
MSC7	1	12	12	22.5	0.94912	236170000	127950000	108230000
YHB1	1	14	14	47.4	0.94932	748760000	414980000	333780000
HNM1	1	2	2	7.5	0.94933	21796000	11881000	9915300
CDS1	1	7	7	13.1	0.94949	462150000	255610000	206540000
ERV29	1	2	2	9	0.94954	23071000	12811000	10261000
YLR422W	1	3	3	1.8	0.94984	11979000	7478800	4500100
RPA49	1	3	3	9.2	0.94985	23479000	12691000	10788000
DHH1	1	2	2	5.7	0.94995	7393800	3549200	3844600
EMG1	1	2	2	8.7	0.94996	19437000	12325000	7111800
RPL5	1	4	4	28.3	0.95023	68821000	38802000	30019000
AFG3	1	7	5	12	0.95055	23717000	12874000	10843000
YET1	1	7	7	23.8	0.95061	303350000	166260000	137080000
EMP47	1	12	12	28.5	0.95075	240420000	132750000	107680000
RSC8	1	4	4	9.5	0.9509	13840000	7045100	6794600
MCD4	1	4	4	6.7	0.95096	36788000	20538000	16251000
SDH7	1	3	3	27.1	0.95139	37170000	15674000	21496000
SRP102	1	7	7	44.7	0.95141	85145000	46107000	39038000
CWH41	1	19	19	23.8	0.95147	405370000	217620000	187760000
CDC12	1	6	6	24.1	0.95161	53820000	29459000	24361000
FAT1	1	12	11	23.2	0.95166	137070000	80589000	56477000
GAR1	1	4	4	17.6	0.95183	16647000	8545800	8101500
ANT1	1	2	2	8.2	0.95197	23807000	13697000	10110000
CPR3	1	9	8	44.5	0.95205	430850000	234420000	196430000
BGL2	1	6	6	35.1	0.95308	1398400000	744480000	653910000
SBH2	1	2	2	38.6	0.95317	230710000	122010000	108700000
RPO41	1	3	3	3.1	0.95338	8122400	4794000	3328400
DPM1	1	8	8	39	0.95349	488760000	263560000	225200000
ERG5	1	15	15	28.6	0.95397	258380000	145440000	112940000
CPR4	1	6	6	30.8	0.9541	72971000	50133000	22838000
RPL42B;RPL42A	2	4	4	30.2	0.95441	45191000	24699000	20492000
GPD1	1	7	6	27.1	0.95452	527900000	291620000	236280000
MRPL27	1	3	3	23.3	0.95523	32913000	17779000	15134000
JAC1	1	2	2	23.9	0.95534	12475000	6940000	5534500
PTC7	1	10	10	36.7	0.95587	120190000	64921000	55270000
MYO1	1	4	4	2.4	0.95597	22828000	12386000	10442000
SHS1	1	4	4	9.1	0.95601	37736000	20327000	17410000
SEC13	1	4	4	19.9	0.95665	50436000	27363000	23073000
POM152	1	31	31	30.1	0.95671	440800000	240670000	200130000
TCB1	1	38	38	35.7	0.95688	1660200000	912020000	748210000
Uncharacterized protein YDR056C	1	4	4	18	0.95727	89427000	50175000	39252000
TYW1	1	10	10	12.3	0.95772	209420000	103020000	106400000
NFU1	1	4	4	20.3	0.95797	28517000	16126000	12391000
MTR4	1	4	4	6.5	0.95819	6367600	3168800	3198900
VPH2	1	5	5	28.8	0.95885	57033000	29445000	27588000
NOP9	1	2	2	4.4	0.9592	2694400	1367500	1326900
LCB2	1	8	8	18.9	0.95938	138780000	74938000	63838000
SSS1	1	1	1	22.5	0.95939	558350000	313100000	245250000
MRPS5	1	6	6	23.1	0.95956	57630000	32723000	24907000
SEC66	1	5	5	28.2	0.96032	242930000	132430000	110490000
SNU13	1	2	2	11.9	0.96064	36096000	19742000	16354000
PAN5	1	3	3	9.8	0.9609	16191000	8988600	7202700
TAF14	1	3	3	16.4	0.96123	17800000	9328800	8471400
NHP2	1	3	3	25	0.96128	70602000	40560000	30042000
DLD2	1	11	11	26.2	0.96172	350820000	192140000	158670000
PRE5	1	2	2	13.2	0.962	4196100	2367200	1829000
RPA190	1	10	10	9	0.96211	46986000	25231000	21755000
STT4	1	3	3	2.4	0.96236	8359300	4747100	3612200
UBX2	1	6	6	13	0.96243	34144000	18950000	15194000
GRX2	1	6	6	38.5	0.96303	205650000	110760000	94889000
PAM16	1	6	6	71.1	0.96304	50409000	28047000	22362000
SAY1	1	2	2	8	0.96316	10854000	5567300	5286900
MPD2	1	4	4	13.4	0.96321	59750000	33892000	25858000
PIS1	1	2	2	9.5	0.96358	52705000	29998000	22707000
LCB1	1	9	9	21.3	0.96375	144020000	79878000	64146000
GPT2	1	7	7	12.1	0.96398	81090000	44081000	37009000
MKC7	1	2	2	5.5	0.96556	9388800	5051900	4337000
NSG2	1	2	2	8.4	0.96579	52217000	29220000	22997000
MRPL4	1	2	2	9.4	0.96619	11718000	6747800	4970500
RTC1	1	5	5	4.7	0.96627	31490000	16402000	15088000
ERG6	1	22	22	49.1	0.96644	2886900000	1417700000	1469200000
NPR3	1	2	2	3.8	0.96657	4495500	2299400	2196000
ILM1	1	2	2	24.6	0.96688	41393000	21571000	19822000
YHR045W	1	5	5	11.4	0.96693	29306000	15704000	13602000
ACT1	1	7	7	33.1	0.96693	297060000	169220000	127850000
NUS1	1	5	5	20	0.96713	54125000	27626000	26499000
SEC12	1	7	7	21.4	0.9673	196590000	110430000	86160000
NFS1	1	4	4	9.5	0.96783	37121000	21371000	15751000
NPR2	1	5	5	11.4	0.96841	44417000	23759000	20658000
LDH1	1	2	2	6.1	0.96851	3361500	1874700	1486800
HAS1	1	2	2	5.1	0.96866	34867000	18169000	16698000
SEC72	1	5	5	25.4	0.9689	89395000	49539000	39855000
PMT2	1	8	8	18.8	0.96937	1827700000	1011000000	816760000
LNP1	1	3	3	11.5	0.9696	11827000	6070700	5756100
CIT2	1	5	4	15.9	0.96979	43012000	24004000	19009000
ERG7	1	10	10	15.6	0.96995	243330000	130680000	112660000
TSC3	1	1	1	12.5	0.97016	44204000	24821000	19383000
CYT1	1	2	2	8.1	0.97017	3041000	1733000	1308000
YOP1	1	4	4	29.4	0.97037	227610000	124970000	102640000
VPS16	2	15	15	24.6	0.97039	86208000	44883000	41325000
ERP1	1	7	7	30.6	0.97074	386690000	210380000	176310000
ASM4	1	3	3	11.9	0.97138	24656000	13761000	10896000
SAC6	1	3	3	8.1	0.97171	15151000	7886500	7264300
CRN1	1	16	16	32	0.9718	272500000	142490000	130010000
GDA1	1	7	7	23.7	0.97184	74995000	40364000	34631000
NUP53	1	5	5	15.8	0.97184	41903000	22852000	19051000
SRP101	1	19	19	43	0.97225	393610000	216390000	177230000
ERV46	1	4	4	12	0.9728	64549000	35903000	28647000
WBP1	1	11	11	36.7	0.97353	1183700000	655180000	528540000
FAS1 domain-containing protein YDR262W	1	3	3	16.5	0.97385	15625000	8136800	7488400
FAA2	1	3	3	6.9	0.97416	8011700	4344400	3667300
VAN1	1	5	5	16.3	0.9744	52342000	26310000	26033000
PGC1	1	5	5	18.1	0.97453	145040000	79584000	65460000
NUP188	1	6	6	4.2	0.97461	41516000	21868000	19649000
PTH2	1	2	2	9.6	0.97482	37953000	21149000	16804000
MDH3	1	10	10	43.1	0.97494	720090000	394960000	325130000
GSP1;GSP2	2	4	4	16.9	0.97498	34325000	13058000	21267000
EFG1	1	2	2	12.9	0.97501	5948600	3153200	2795400
YLR419W	1	7	7	6.5	0.9753	150560000	84290000	66265000
LYS1	1	5	5	17.4	0.97558	77685000	40417000	37267000
MEX67	1	5	5	12.7	0.976	32737000	18456000	14282000
FLC1	1	4	4	7.4	0.97623	46562000	25772000	20790000
RPC40	1	4	4	14.9	0.97638	28668000	15144000	13524000
PGA3	1	5	5	23.4	0.97705	109010000	54803000	54207000
GIS4	1	1	1	1.8	0.97776	17759000	10564000	7194500
RPS25B	1	4	1	36.1	0.97788	34993000	19449000	15544000
HFD1	1	8	8	13.7	0.9782	107200000	59229000	47974000
RSM19	1	3	3	56	0.97922	19308000	9628600	9679300
COS7;COS5	2	4	3	11	0.97961	14094000	8183700	5910600
Uncharacterized protein YEL043W	1	8	8	9.5	0.97996	59708000	31803000	27905000
RPD3	1	4	4	18.7	0.98023	12605000	6557000	6048100
AIM18	1	5	5	18.7	0.98059	44758000	26220000	18538000
IRE1	1	2	2	2.4	0.98063	4024800	1995100	2029700
NPP1	1	3	3	5.3	0.98108	15035000	7720200	7314400
GLR1	1	9	9	28.6	0.98163	96900000	53601000	43299000
STE13	1	3	3	3.7	0.98419	9240200	4909100	4331000
OSH6	1	16	16	39.3	0.98446	851920000	452970000	398960000
GSF2	1	12	12	38.7	0.98542	679980000	350100000	329880000
Uncharacterized protein YBR096W	1	2	2	8.3	0.98574	113270000	44367000	68906000
ROT2	1	3	3	5.3	0.98578	124960000	69411000	55548000
PSD1	1	7	7	17.8	0.98622	73402000	40261000	33141000
Uncharacterized protein YJL132W	1	2	2	3.3	0.98626	5839400	3096600	2742800
MNN9	2	6	6	16.7	0.98628	209100000	115920000	93178000
VAR1	1	2	2	10.1	0.9872	4502700	2367800	2134900
HTB2;HTB1	2	3	3	24.4	0.98771	1581800000	857380000	724440000
TY1B-PL;TY1B-GR2;TY1B-ML1;TY1B-DR1;TY1B-ER1;TY1B-ML2;TY1B-JR1;TY1B-PR1;TY1B-LR4;TY1B-LR2;TY1B-DR6;TY1B-DR5;TY1B-PR2;TY1B-DR4;TY1B-DR3;TY1B-OL;TY1B-GR1;TY1B-LR1;TY1B-MR2;TY1B-ER2;TY1B-JR2;TY1B-PR3;TY1B-LR3;TY1B-H;TY1B-NL2;TY1B-OR;TY1B-GR3;TY1B-BR;TY1A-PR3;TY1A-GR2;TY1A-NL2;TY1A-BR;TY1A-GR1;TY1A-ML1;TY1A-DR1;TY1A-JR2;TY1A-ML2;TY1A-LR3;TY1A-JR1;TY1A-PL;TY1A-LR2;TY1A-ER1;TY1A-DR6;TY1A-MR2;TY1A-LR1;TY…	58	14	6	12.6	0.98772	654000000	367710000	286290000
TOS1	1	3	3	11.4	0.98813	112660000	60863000	51797000
CIC1	1	6	6	19.4	0.98821	42364000	19526000	22838000
NOP1	1	12	12	40.1	0.98868	212920000	115800000	97120000
PPN1	1	10	10	24	0.98887	110290000	58130000	52160000
PRD1	1	7	7	15	0.98893	35837000	18702000	17135000
PRC1	1	9	9	23.9	0.98899	226300000	119200000	107100000
ECM31	1	4	4	19.2	0.98927	20857000	11631000	9225600
MNN2	1	17	17	37.9	0.98954	288740000	154790000	133950000
NIC96	1	19	19	21.8	0.98956	133220000	71273000	61951000
GET3	1	11	11	39.8	0.99051	90571000	48522000	42049000
UTH1	1	5	5	17.3	0.99092	78606000	42377000	36230000
ARB1	1	5	5	13	0.99185	29510000	15096000	14414000
VPS17	1	4	4	11.3	0.99217	14815000	8421400	6394000
NADPH-dependent alpha-keto amide reductase	1	5	5	25	0.99318	37836000	29579000	8256700
EMP24	1	2	2	16.7	0.9935	137940000	77167000	60773000
UTP22	1	3	3	4.4	0.99351	6499900	4225600	2274300
PFF1	1	17	17	23.3	0.99352	1161400000	616420000	544950000
ARF3	1	4	4	30.1	0.99356	53136000	28112000	25024000
Putative lipase YOR059C	1	2	2	4	0.99364	8659400	4763800	3895600
KEX1	1	5	5	12.1	0.99386	17537000	9696900	7840000
SRC1	1	4	4	5.6	0.99431	27820000	15047000	12773000
RRS1	1	3	3	28.6	0.99436	12751000	6930900	5820400
APE2	1	15	15	22	0.99518	132910000	68064000	64847000
ERJ5	1	3	3	11.9	0.99521	93382000	44230000	49152000
NUP157	1	14	14	13.9	0.99633	79124000	42702000	36421000
DUP240 protein YAR028W	1	2	2	15	0.99651	36037000	19804000	16233000
AXL2	1	5	5	5.7	0.99696	14254000	7799000	6455300
ERG26	1	11	11	47.6	0.99709	592360000	257830000	334540000
NUP145	1	2	2	1.5	0.99723	6223700	3278000	2945600
ATG27	1	9	9	42.1	0.99724	282820000	145050000	137760000
FKS1	1	15	8	9.9	0.99736	131630000	69387000	62246000
RTC5	1	16	16	36	0.9979	354250000	190200000	164050000
MDH2	1	3	3	10.3	0.99815	20312000	11173000	9139300
ENV9	1	3	3	8.5	0.99845	12280000	6198100	6081700
CPA2	1	2	2	3	0.99873	2639500	1479300	1160200
ELO2	1	3	3	7.8	0.99891	228810000	125710000	103100000
NTE1	1	15	15	10.1	0.99903	117390000	62725000	54670000
HMO1	1	5	5	21.5	0.99919	92491000	48946000	43545000
IML2	1	11	11	17.2	0.99949	77640000	36846000	40794000
RHO1	1	5	5	34	0.9996	3079100000	1648800000	1430300000
DYN2	1	1	1	10.9	1.0003	10049000	5570700	4478800
SAM1	1	7	2	29.3	1.0007	6139800	3415300	2724400
FMP41	1	2	2	10	1.0008	9146000	4387600	4758400
DUG1	1	9	9	24.7	1.0009	84696000	46444000	38251000
PBP1	1	2	2	3.3	1.001	1377400	654840	722520
ARE2	1	6	6	8.6	1.0011	57353000	30589000	26765000
RNY1	1	5	5	16.1	1.0012	43422000	22287000	21134000
MCR1	1	10	10	39.7	1.0018	186650000	100900000	85751000
MPM1	1	5	5	26.6	1.0022	55240000	29666000	25574000
ATG15	1	2	2	6.5	1.0027	8758700	4564600	4194100
NUP57	1	6	6	15.3	1.0028	57075000	30355000	26720000
AIM6	1	9	9	35.6	1.0028	237040000	123350000	113690000
ALG1	1	3	3	6.9	1.0037	18068000	10061000	8007000
MZM1	1	2	2	22.8	1.0037	32236000	17506000	14731000
AKR2	1	2	2	4.8	1.0038	32382000	17089000	15293000
RVB2	1	8	8	25.9	1.0041	50771000	26012000	24759000
PGA2	1	6	6	50.4	1.0042	110350000	61208000	49138000
FAB1	1	11	11	6.2	1.0043	39833000	20766000	19067000
ISU1	1	2	2	17	1.0057	30939000	14796000	16143000
PEX14	1	13	13	36.4	1.0067	191700000	95115000	96584000
RPS2	1	5	5	28.3	1.0072	70494000	34994000	35499000
CPS1	1	12	12	17	1.0073	474000000	256400000	217600000
DGA1	1	4	4	13.6	1.0074	44683000	24497000	20186000
YIM1	1	10	10	25.2	1.0077	400570000	215240000	185330000
SEC26	1	3	3	7.6	1.0077	26891000	22529000	4361900
YSY6	1	1	1	20	1.0079	565620000	311310000	254310000
GET1	1	6	6	30.6	1.0087	204320000	112350000	91974000
YLR326W	1	1	1	6.2	1.0087	34755000	17903000	16852000
UIP3	1	4	4	14	1.0092	43982000	22852000	21131000
GAS3	1	10	10	22.5	1.0098	210130000	119440000	90691000
ARP5	1	2	2	3.7	1.0099	5556900	2959400	2597500
VPS13	1	26	26	10.6	1.0099	120350000	73107000	47244000
ERG27	1	13	13	37.5	1.0099	1282200000	694530000	587660000
GPD2	1	5	4	20	1.01	20458000	11391000	9067200
ANP1	1	5	5	12	1.0104	13140000	7616000	5524000
VAS1	1	21	21	23.9	1.0105	138300000	71560000	66735000
TES1	1	4	4	19.2	1.0105	20600000	10656000	9943800
MON2	1	13	13	8.7	1.0113	298230000	158310000	139910000
IOC2	1	1	1	1.6	1.0115	4048400	2209800	1838600
FAA1	1	37	36	58.6	1.0122	7584600000	4090400000	3494200000
SMC3	1	4	4	4.7	1.0124	7265100	3658900	3606200
VMA16	1	1	1	5.2	1.014	19494000	10074000	9419400
ATG22	1	4	4	11	1.0148	19765000	10225000	9540300
MNS1	1	7	7	17.3	1.0152	26669000	14928000	11740000
TGL1	1	6	6	16.4	1.0158	46246000	24176000	22070000
RCF2	1	2	2	14.7	1.0159	87427000	48801000	38626000
VPS41	1	12	12	13.8	1.016	216340000	112670000	103670000
ATH1	1	2	2	2	1.0163	5650500	2384600	3265900
XDJ1	1	3	3	4.8	1.0167	17269000	3117700	14151000
LAG1	1	4	4	8.5	1.0173	59558000	33984000	25574000
GPI16	1	2	2	3	1.0178	61484000	32110000	29374000
MRPL32	1	2	2	24.6	1.0187	12102000	6725400	5376600
EGD2	1	2	2	21.3	1.0189	8411400	3914000	4497400
YET3	1	6	6	26.6	1.021	188560000	101570000	86988000
AIF1	1	8	8	24.3	1.0213	32839000	15791000	17048000
RPO21	1	5	5	4.3	1.0214	29931000	16424000	13508000
UBA1	1	5	5	7.9	1.0215	8638000	4349900	4288100
SEC17	1	13	13	52.4	1.0219	429920000	230910000	199010000
ERV25	1	1	1	7.6	1.0222	65093000	35521000	29573000
TOR2	1	10	9	6.6	1.0225	35486000	19926000	15561000
TOR1	1	30	29	16.2	1.0228	369460000	196810000	172650000
2018-10-01	1	3	3	4.4	1.0241	2978500	1498200	1480200
AGP2	1	3	3	3.9	1.0253	24645000	13802000	10843000
SEC24	1	5	5	6.9	1.0256	84827000	42921000	41906000
FAR10	1	5	5	10.9	1.0256	16580000	8338400	8241400
YRA1	1	7	7	33.6	1.0257	137320000	71218000	66102000
SSM4	1	8	8	6.2	1.0258	35632000	20672000	14960000
FUN12	1	3	3	5.6	1.0259	12540000	6745300	5794600
CUE4	1	1	1	20.5	1.0259	8701200	4431900	4269300
CMS1	1	2	2	10.3	1.0259	2360900	1137000	1223900
FMP42	1	5	5	7.7	1.026	101640000	52430000	49209000
VMA10	1	11	11	54.4	1.0266	3659900000	1902500000	1757400000
RVB1	1	7	7	22	1.028	97285000	40472000	56813000
YCK3	1	11	11	36.3	1.0284	2151000000	1118700000	1032300000
YKL077W	1	5	5	9.2	1.0289	196080000	103120000	92967000
VMA5	1	17	17	48.2	1.029	3086200000	1614400000	1471800000
VOA1	1	3	3	13.2	1.0291	93327000	51705000	41622000
OSW7	1	6	6	19.6	1.0292	30347000	15920000	14427000
PRM5	1	8	8	39	1.0293	144220000	75863000	68357000
DID4	1	8	8	22	1.0298	228140000	120570000	107570000
CHS3	1	8	8	11.3	1.03	92148000	46010000	46138000
SCM4	1	4	4	17.6	1.0301	44623000	24350000	20273000
PEP3	1	25	24	32.4	1.0302	203840000	104490000	99354000
SLY1	1	3	3	6.8	1.0304	3909300	2001000	1908300
CDC11	1	1	1	2.4	1.0304	25611000	14177000	11433000
Cysteine--tRNA ligase	1	5	5	6.9	1.0305	24237000	12206000	12031000
RPL27A;RPL27B	2	9	9	72.8	1.0307	968960000	492820000	476140000
NUP60	1	2	2	5.6	1.031	30993000	15829000	15164000
EXG2	1	2	2	4.1	1.0313	9647000	4789600	4857400
DOP1	1	17	17	12.2	1.0315	149580000	77781000	71794000
RQC2	1	2	2	2.8	1.0316	5468400	2949400	2519000
HTA2;HTA1	2	3	3	33.3	1.0323	37783000	19550000	18233000
MAK21	1	7	7	9.7	1.0328	15805000	7948900	7855900
YOR389W;YPL277C	2	4	4	8.7	1.035	34241000	18163000	16077000
EHT1	1	15	15	34.1	1.0352	494150000	261570000	232590000
RPL20B;RPL20A	2	5	5	30.2	1.0353	111840000	58147000	53695000
RPL6A	1	9	5	39.2	1.0353	188230000	87475000	100760000
CCC2	1	3	3	4.7	1.0354	8081400	3862700	4218700
KRE33	1	2	2	3.1	1.0368	3518700	1842400	1676300
BUL1	1	2	2	2.4	1.0371	5541600	2503800	3037800
MDM20	1	7	7	9.4	1.0374	47259000	25146000	22113000
Putative serine carboxypeptidase YBR139W	1	5	5	9.8	1.0378	172700000	81835000	90861000
LYS9	1	2	2	9.9	1.0384	2430500	1117200	1313200
SNF7	1	5	5	29.6	1.0387	53975000	28342000	25633000
VPS3	1	3	3	4.4	1.0388	3389500	1564200	1825300
EBP2	1	6	6	21.8	1.0393	41193000	20769000	20424000
NOP4	1	5	5	8.6	1.0394	30856000	16524000	14332000
NOP13	1	6	6	16.6	1.0397	30831000	14739000	16092000
BDH1	1	2	2	7.6	1.04	5333400	2606700	2726700
YLR072W	1	3	3	4.6	1.04	30892000	16750000	14142000
ECM21	1	4	4	4.9	1.0401	31685000	17287000	14398000
GTT3	1	1	1	4.7	1.0403	4218000	2192000	2026000
VAM6	1	22	22	25.5	1.0404	398940000	201300000	197630000
VMA2	1	21	21	47.4	1.0405	13444000000	6809900000	6634500000
YGL082W	1	2	2	7.1	1.0411	18096000	8867300	9229200
VMA1	1	37	37	46.5	1.0421	24978000000	13053000000	11925000000
CDC60	1	9	9	11.6	1.0425	29136000	12902000	16234000
IML1	1	7	7	6.8	1.043	64795000	33903000	30892000
VTC2	1	42	41	53.7	1.0431	3972000000	2056100000	1915900000
DED1	1	6	6	18.9	1.0437	204280000	102060000	102220000
FRS2	1	4	4	12.5	1.0437	18361000	9449300	8912000
SUP45	1	6	6	16.7	1.044	19449000	9893800	9555000
SCT1	1	5	5	8.8	1.044	33777000	19251000	14526000
VAM7	1	4	4	20.9	1.0441	81310000	41595000	39715000
VPS5	1	13	13	24.3	1.0442	80802000	34918000	45885000
VMA13	1	20	20	39.1	1.0448	1598400000	829710000	768720000
RMD1	1	12	12	35.8	1.0448	280630000	148560000	132070000
RPA135	1	5	5	6.7	1.0449	11548000	5764500	5783200
YLR413W	1	2	2	5.3	1.0453	29225000	14726000	14499000
SPT16	1	9	9	11.6	1.0454	39001000	20173000	18828000
FAR11	1	4	4	7.2	1.0456	17477000	9501600	7975500
FIG4	1	3	3	4.3	1.047	14407000	7596300	6810500
SCW4	1	6	6	13.2	1.0473	65415000	35552000	29863000
FPR3	1	5	4	15.3	1.0476	140600000	74423000	66172000
RPL30	1	3	3	34.3	1.0479	11349000	4714500	6635000
IMD4	1	9	6	24.2	1.048	14511000	7644500	6866200
GGA2	1	5	5	12.8	1.0487	18008000	8975400	9032200
HHO1	1	2	2	8.5	1.0489	17204000	8809600	8394300
DLD3	1	4	4	12.3	1.049	19068000	9545900	9522400
CHS5	1	2	2	4.3	1.049	3184200	1646800	1537400
COF1	1	3	3	31.5	1.0499	15309000	7758100	7551300
PEP5	1	23	23	31.1	1.0501	470310000	255590000	214720000
RPL16A	1	9	6	42.2	1.0503	146580000	70963000	75614000
GPI8	1	2	2	11.7	1.0503	22115000	12424000	9690600
RPF2	1	2	2	8.7	1.0506	7000000	3500500	3499500
ECM14	1	6	6	15.6	1.051	371990000	186720000	185270000
TOP1	1	4	4	6.9	1.0514	19482000	9878800	9602900
PPZ1	1	5	5	12.3	1.0527	82465000	38024000	44441000
SAK1	1	9	9	9.8	1.0531	83741000	43687000	40054000
KOG1	1	25	25	23.1	1.0532	375440000	197520000	177920000
FUS3	1	3	3	10.2	1.0536	29407000	15103000	14305000
RPL16B	1	10	7	43.9	1.0537	369640000	192680000	176960000
FUI1	1	5	5	12.2	1.0542	12263000	6312700	5950100
KRE2	1	5	5	13.3	1.0543	125450000	57282000	68163000
Uncharacterized protein YDR089W	1	21	21	28	1.0545	396150000	206410000	189740000
PEP8	1	5	5	21.1	1.0553	120960000	69640000	51324000
VMA6	1	5	5	28.4	1.0555	571610000	277800000	293810000
ODC2	1	3	3	13.7	1.0557	11546000	5211000	6334600
YPT7	1	5	5	25	1.0558	876610000	447100000	429520000
VTC3	1	33	32	43.4	1.056	2155800000	1104900000	1050900000
NOP7	1	6	6	15.7	1.0563	52091000	27707000	24384000
CSC1	1	6	6	9.8	1.0564	133380000	71041000	62339000
CCT2	1	3	3	10.4	1.0568	8306600	4067000	4239600
UTR2	1	3	3	10.5	1.0576	164680000	85885000	78799000
PRM4	1	3	3	15.5	1.0577	6451300	3544300	2907000
PHO8	2	14	14	26.1	1.058	3762900000	1939300000	1823600000
VTC4	1	29	29	45.1	1.0583	5593700000	2924100000	2669600000
VMA8	1	7	7	32	1.0585	1731500000	920420000	811080000
VPS30	1	8	8	16.7	1.0588	163280000	82303000	80975000
FCY2	1	5	5	8.6	1.0589	103090000	53287000	49802000
ERV41	1	2	2	11.6	1.059	9336700	4494600	4842100
TCO89	1	6	6	11	1.0591	104920000	54358000	50566000
RPL1B;RPL1A	2	11	11	42.4	1.0594	762070000	388450000	373620000
NUP170	1	12	12	10.9	1.0596	46085000	24122000	21964000
STE18	1	4	4	72.7	1.0599	60843000	30461000	30382000
NOC2	1	7	7	12.7	1.0599	44948000	23880000	21068000
CCC1	1	3	3	6.5	1.0606	355120000	181830000	173290000
RPL43B;RPL43A	2	2	2	34.8	1.0609	21543000	11416000	10127000
ENT4	1	3	3	17	1.061	38251000	19143000	19108000
NEO1	1	7	7	10.2	1.0611	36294000	19088000	17206000
CAR2	1	2	2	8	1.0614	17334000	8690500	8643100
VMA4	1	20	20	86.7	1.0614	8497100000	4537000000	3960100000
TAO3	1	16	16	8.7	1.0622	74162000	37768000	36394000
FAA3	1	5	4	7.6	1.0626	30671000	15550000	15121000
VPS62	1	4	4	13.3	1.0626	395960000	203670000	192290000
PRO2	1	4	4	14.7	1.0627	7998300	3441200	4557100
RPL21A;RPL21B	2	8	8	60.6	1.0629	371840000	179500000	192340000
GPP1	1	12	7	51.6	1.0632	226620000	118890000	107730000
DJP1	1	2	2	7.6	1.0638	9542800	4979400	4563400
PDR16	1	12	12	42.5	1.0641	698070000	481740000	216330000
VHC1	1	10	10	9.1	1.0644	371090000	187170000	183920000
PEP4	1	16	16	48.9	1.0645	3710800000	1907600000	1803200000
LIP1	1	2	2	14	1.065	89892000	48795000	41097000
FRA1	1	15	15	23.6	1.0651	1169900000	603000000	566870000
SSF2;SSF1	2	2	2	6.4	1.0652	20935000	10408000	10527000
AKR1	1	2	2	3.1	1.0656	5390300	2999500	2390900
YDJ1	1	15	15	38.6	1.0658	567110000	328510000	238610000
VAC14	1	5	4	6.6	1.0659	54051000	29034000	25016000
NUC1	1	3	3	15.5	1.0664	31554000	16022000	15531000
GCN1	1	3	3	1.7	1.0664	3460800	1741300	1719500
FAA4	1	13	11	23.5	1.0675	406860000	214130000	192730000
YGL140C	1	2	2	2.9	1.0675	7141600	4248000	2893600
STE4	1	6	6	14.4	1.0677	88293000	45882000	42411000
TUL1	1	5	5	9	1.0682	14570000	7641000	6929200
RPN2	1	4	4	6.3	1.069	30598000	16923000	13675000
APE3	1	19	19	42.1	1.0696	13263000000	6860000000	6402900000
PHO91	1	17	17	20.8	1.0698	1114300000	592120000	522200000
RPL36A	1	6	2	45	1.07	37350000	18380000	18970000
DIP5	1	6	6	11	1.0705	87115000	45683000	41432000
CDC42	1	4	4	22	1.0708	347030000	181650000	165380000
RPL8B	1	18	4	61.7	1.0708	1566800000	812940000	753830000
ARO1	1	2	2	2.6	1.0711	4499300	2339900	2159400
DID2	1	4	4	27	1.0716	88306000	47229000	41077000
TIP20	1	3	3	6.4	1.0727	40832000	3755400	37076000
VPS29	1	5	5	27.3	1.0727	57625000	30326000	27299000
RPL15A;RPL15B	2	7	7	39.2	1.0728	491800000	230030000	261780000
YPT32	1	9	8	50.5	1.0729	331780000	169720000	162060000
SAS10	1	4	4	8.4	1.0736	30330000	17143000	13187000
VAC8	1	15	15	36.5	1.0738	4821800000	2493500000	2328300000
MSF1	1	2	2	5.3	1.0739	253450000	131310000	122130000
VPS15	1	9	9	7.8	1.0743	124630000	59188000	65446000
VPS33	1	14	14	19	1.0746	524250000	242390000	281860000
RPL3	1	19	19	53	1.0747	1100100000	563900000	536190000
NSR1	1	6	6	14.5	1.075	151510000	79972000	71538000
HNT1	1	4	4	41.8	1.0751	33025000	17957000	15068000
ADE3	1	12	12	20.9	1.0752	51364000	27038000	24326000
SHM2	1	6	6	13.4	1.0763	25348000	17520000	7827600
DNF2	1	11	8	10.7	1.0764	138770000	65198000	73572000
SMF3	1	5	5	15	1.0775	97328000	49790000	47538000
RSR1	1	4	4	18.8	1.0776	218860000	109920000	108940000
VPS1	1	26	26	41.3	1.078	2299900000	1158200000	1141700000
RPS5	1	5	5	30.7	1.0782	516270000	272100000	244160000
PUF6	1	2	2	3.5	1.0784	8685000	3258100	5426900
MRL1	1	3	3	11	1.0788	2795800	1443600	1352200
HEH2	1	5	5	9.4	1.0789	77237000	42967000	34270000
HXK1	1	8	7	27.6	1.079	70088000	60875000	9213400
GRX4	1	5	5	27.5	1.0791	11820000	6066300	5753500
YOR1	1	5	5	5.4	1.0795	14003000	8439400	5563600
VAC17	1	2	2	7.3	1.0797	13572000	7061500	6510900
RPS18B;RPS18A	2	8	8	62.3	1.0801	187450000	99484000	87968000
SEC23	1	5	5	9.6	1.0801	42051000	20288000	21762000
ATG8	1	4	4	40.2	1.0804	55255000	29224000	26031000
ADE6	1	3	3	3.8	1.0804	9705100	7659200	2045900
RPL11B;RPL11A	2	9	9	43.7	1.0806	576690000	295440000	281250000
VPS38	1	2	2	5.5	1.0808	18225000	9207100	9017600
YIL108W	1	4	4	7.3	1.0809	31445000	16100000	15345000
GLN4	1	6	6	9.5	1.0812	23568000	18738000	4830300
TIF4631	1	6	5	9.5	1.0814	16369000	8601400	7767300
ACC1	2	26	26	15.1	1.0815	239520000	119340000	120180000
SNF1	1	3	3	8.7	1.0816	11259000	5672300	5587000
NOG1	1	4	4	10.4	1.0818	25644000	13073000	12571000
NPC2	1	5	5	26.6	1.082	45514000	25337000	20177000
YDL180W	1	5	5	15.5	1.0822	73073000	36805000	36268000
BCY1	1	5	5	13.5	1.0823	10888000	5607200	5281300
SEN54	1	3	3	9	1.0823	4957200	2174000	2783200
FMP52	1	10	10	49.4	1.0825	414850000	155460000	259390000
RRB1	1	3	3	8.8	1.0825	9636500	5141600	4494900
NCR1	1	6	6	5.3	1.0831	107130000	52370000	54765000
NAB2	1	2	2	6.5	1.0833	14115000	8191900	5923000
RMD8	1	8	8	18.7	1.0834	92785000	47713000	45072000
MVP1	1	7	7	18	1.0839	45955000	24990000	20965000
FRE8	1	4	4	8.5	1.084	12494000	6117000	6377300
DAP2	1	19	19	29.1	1.0841	2102000000	1095000000	1007000000
SYG1	1	7	7	10.1	1.0846	493600000	255920000	237680000
ATG21	1	3	3	11.9	1.0847	7788500	4200800	3587700
VTC1	1	4	4	17.8	1.0849	2830500000	1454700000	1375800000
PSP2	1	2	2	4.4	1.0849	7150600	3602100	3548500
HXT2	1	3	3	7.9	1.086	37121000	18067000	19053000
CCP1	1	3	3	11.4	1.0862	32919000	17514000	15405000
TMA7	1	2	2	40.6	1.0867	36991000	18570000	18421000
GAS1	1	8	8	22.4	1.0876	1918800000	1003100000	915740000
YPK9	1	10	10	9.2	1.0878	251300000	130060000	121240000
YML020W	1	10	10	20	1.0881	141990000	73551000	68438000
BPT1	2	24	22	20.5	1.0883	1227100000	640330000	586750000
RPL7B	1	9	1	43.4	1.0887	154060000	80217000	73844000
Uncharacterized membrane protein YCR023C	1	5	5	4.7	1.0888	89768000	46923000	42845000
YHR202W	1	3	3	7.1	1.0893	14537000	7677200	6859800
RPL31B;RPL31A	2	3	3	35.4	1.09	72538000	35917000	36621000
PIB2	1	9	9	20.3	1.09	203040000	107560000	95488000
YBT1	3	35	35	25.3	1.0904	4719600000	2425900000	2293700000
NIF3	1	3	3	12.5	1.0907	19109000	8859600	10249000
LSB6	1	7	7	15.3	1.091	171280000	87393000	83889000
DCR2	1	1	1	3.6	1.0915	10876000	5585100	5290500
RPL34A	1	6	1	69.4	1.0916	20494000	10883000	9611100
GCD11	1	4	4	13.7	1.0917	20476000	11334000	9142000
VMA7	1	3	3	40.7	1.092	72899000	38317000	34582000
ADE5,7	1	4	4	8	1.0924	32062000	17703000	14360000
RPL6B	1	12	8	48.9	1.0925	638560000	264640000	373930000
RNR4	1	4	4	14.2	1.093	16265000	9011500	7253400
VMA11	1	1	1	11	1.0934	77803000	40642000	37160000
RPL28	1	10	10	53	1.0937	328880000	168290000	160590000
SNX3	1	2	2	22.2	1.0944	18464000	9374200	9090200
SRV2	1	4	4	17.9	1.0948	20108000	16506000	3602200
RPL2B;RPL2A	2	15	15	83.1	1.0953	2159000000	1125700000	1033300000
SNX4	1	10	10	39.5	1.0973	57076000	29302000	27773000
Arginine--tRNA ligase, cytoplasmic	1	2	2	4.1	1.0975	4808700	2411300	2397500
MAM3	1	11	11	31.6	1.0977	547770000	267850000	279910000
OPI1	1	2	2	10.6	1.0978	7175600	3879600	3296000
DGK1	1	4	4	19.7	1.0979	12691000	6201400	6489500
TGL4	1	5	5	8.1	1.0982	60885000	34114000	26771000
ADP1	1	12	12	14.6	1.0983	307200000	159320000	147880000
YPT10	1	7	7	41.7	1.0983	132500000	67137000	65367000
NAM7	1	1	1	1.4	1.0988	12482000	6182700	6299500
FET5	1	6	6	14.6	1.0988	1303400000	672130000	631310000
YVC1	1	11	11	21.8	1.0989	851440000	435340000	416090000
DSL1	1	3	3	5.7	1.099	7487100	3607900	3879100
RPS17B;RPS17A	2	6	6	64.7	1.0991	41714000	20882000	20832000
UTP13	1	2	2	4.2	1.1	5114400	2466100	2648200
RPL7A	1	9	1	43.4	1.1004	2343900000	1208300000	1135600000
SEC18	1	16	16	33.8	1.1007	211300000	106040000	105260000
NOP12	1	3	3	12	1.101	12365000	6226800	6138400
YCF1	1	32	30	23.1	1.1012	2907700000	1481400000	1426300000
FET3	1	4	4	9.6	1.1025	305730000	150920000	154810000
CCS1	1	2	2	16.1	1.1027	8986700	4986600	4000100
MNR2	1	9	9	17.2	1.1034	276920000	144040000	132880000
YJU3	1	10	10	38.7	1.1037	692020000	361520000	330500000
GUT2	1	2	2	3.4	1.1042	8888100	4684500	4203600
RSN1	1	19	19	18.7	1.1044	255640000	124370000	131270000
SSD1	1	7	7	8	1.105	14608000	7235500	7372800
VPS34	1	9	9	13.6	1.1051	300900000	224550000	76346000
Uncharacterized vacuolar membrane protein YGR125W	1	9	9	9.5	1.1051	156120000	64025000	92091000
MDM1	1	2	2	2.3	1.1057	2726800	1398300	1328400
ISW1	1	8	8	10.5	1.1066	24424000	12446000	11978000
AQR1	1	2	2	4.9	1.1066	6811300	3401900	3409400
PAB1	1	24	24	44.7	1.1068	1216400000	625250000	591190000
PDR17	1	4	4	13.7	1.1072	17779000	5976500	11802000
ARX1	1	5	5	11.8	1.1075	14930000	7183700	7746700
FBA1	1	17	17	64.3	1.1077	1109200000	541020000	568140000
UBX3	1	4	4	12.3	1.1083	26890000	13485000	13405000
SCS2	1	11	11	53.7	1.1084	473130000	245630000	227500000
ZRT3	1	5	5	13.3	1.109	157230000	79791000	77439000
VTI1	1	3	3	17.5	1.1091	224280000	109630000	114640000
MGR3	1	2	2	5.2	1.1091	7373400	4166800	3206500
FRE6	1	4	4	5.8	1.1092	15726000	7723900	8002000
LCB3	1	1	1	2.7	1.1095	34551000	17637000	16914000
GTT1	1	9	9	46.2	1.11	381410000	196560000	184840000
ALA1	1	20	20	25.4	1.1109	85114000	41505000	43609000
IMD3	2	11	5	30.6	1.1111	559320000	287590000	271730000
VAM3	1	6	6	35.7	1.1111	201820000	100100000	101710000
HMX1	1	3	3	8.8	1.1112	22578000	10829000	11749000
RDI1	1	10	10	60.4	1.1113	165260000	82345000	82911000
RPB3	1	2	2	8.5	1.1125	3439200	1685000	1754100
MHP1	1	9	9	8.9	1.1125	64407000	37149000	27258000
RPL36B	1	6	2	45	1.1138	468860000	240140000	228720000
OSH7	1	6	6	19.2	1.1139	81957000	41485000	40472000
IST1	1	4	4	9.7	1.1141	34104000	18235000	15869000
YPT1	1	6	6	23.3	1.1142	440390000	201390000	239000000
DBP5	1	4	4	9.1	1.1142	251070000	122550000	128520000
CDC48	1	18	18	32.1	1.1146	391320000	200110000	191210000
Uncharacterized protein YMR160W	1	11	11	16.9	1.1146	86214000	44846000	41369000
Probable intramembrane protease YKL100C	1	3	3	7	1.1149	50280000	25492000	24788000
GLE2	1	1	1	5.5	1.1152	9549800	5001300	4548500
RPL17B;RPL17A	2	6	6	46.7	1.1155	617950000	311910000	306040000
RPL10	1	11	11	36.7	1.1155	1701500000	895160000	806380000
COP1	1	5	5	6.3	1.1159	14167000	10445000	3722700
RPL9A	1	10	1	54.5	1.1163	230190000	118020000	112170000
UGP1	1	8	8	22.6	1.1166	71442000	37553000	33889000
GRS1	1	16	16	31.7	1.1167	136530000	60074000	76458000
GUK1	1	5	5	29.9	1.1169	32602000	14970000	17632000
SRM1	1	2	2	4.8	1.1172	7695100	4443100	3252000
VHT1	1	2	2	3.9	1.1177	16356000	8981800	7374500
RPL12B;RPL12A	2	7	7	62.4	1.1181	744170000	383300000	360870000
VPH1	1	14	14	25.6	1.1185	7694800000	3989000000	3705700000
RSC3	1	2	2	2	1.1189	3808100	1774500	2033700
RTN1	1	11	11	49.5	1.1201	370100000	190830000	179270000
TIF1	1	6	6	25.6	1.1214	36392000	18149000	18243000
ANR2	1	11	11	27.7	1.1214	212900000	113300000	99598000
TNA1	1	7	7	11.4	1.1219	79425000	42504000	36921000
RFC1	1	2	2	3.6	1.1223	3006200	1434700	1571400
SEC21	1	2	2	4.3	1.1227	8068600	4075300	3993300
ATP11	1	2	2	5.7	1.1227	20831000	10149000	10682000
Uncharacterized vacuolar membrane protein YNL115C	1	7	7	13	1.1229	233760000	133420000	100340000
SLG1	1	3	3	13.2	1.1229	169070000	83345000	85724000
ENA5;ENA2;ENA1	3	21	21	25.4	1.123	466390000	267300000	199090000
PEP1	3	30	29	24.5	1.1231	441910000	216030000	225870000
RRP15	1	2	2	12.4	1.1231	5791600	3294500	2497000
RPL26B;RPL26A	2	8	8	68.5	1.125	892330000	442280000	450040000
Cell wall protein YJL171C	1	5	5	17.7	1.1257	546820000	272890000	273930000
RPL25	1	6	6	50	1.1265	543000000	280120000	262870000
SIS1	1	12	12	41.8	1.1276	568980000	287160000	281830000
ARP2	1	4	4	15.9	1.1279	16146000	8467100	7678800
RPL4A	1	11	4	30.4	1.1285	1047300000	529920000	517360000
RPS8B;RPS8A	2	7	7	31	1.1292	426060000	209620000	216440000
CDC50	1	3	3	8.2	1.1292	7381200	4340000	3041100
RPS12	1	4	4	25.9	1.1294	91177000	46752000	44425000
MDY2	1	4	4	25.9	1.1304	9886000	5004100	4881900
TIF3	1	2	2	9.4	1.132	6770600	3445100	3325500
MYO5	1	11	9	11.2	1.1321	95561000	48604000	46957000
BEM2	1	2	2	1.8	1.1333	4891300	2438600	2452700
TAT1	1	4	4	10.3	1.1357	19231000	9883400	9347500
RPL13B;RPL13A	2	6	6	22.6	1.1358	175360000	87865000	87495000
MSC3	1	2	2	4.1	1.1358	9362900	5541500	3821400
TYS1	1	7	7	24.1	1.1361	17416000	7874300	9541700
PLB1	1	3	3	5.4	1.1363	52393000	26442000	25951000
RPP0	1	6	6	29.5	1.1369	312650000	159050000	153590000
YPS1	1	3	3	4.4	1.1378	145930000	74227000	71708000
PTC4	1	2	2	4.8	1.1384	15088000	7475300	7612300
RPS22B;RPS22A	2	2	2	22.3	1.1385	90542000	45570000	44973000
SCP160	1	40	40	43.3	1.1391	666240000	322240000	344010000
SSH4	1	3	3	6.6	1.14	15023000	7511800	7511000
KES1	1	16	16	42.6	1.1403	383670000	192610000	191060000
GLK1	1	2	2	5.2	1.1412	10313000	5286500	5026300
GAS5	1	2	2	6.4	1.1414	38705000	18106000	20599000
RPL23B;RPL23A	2	3	3	25.5	1.1429	49400000	25515000	23885000
SWH1	1	5	5	6	1.1432	12876000	5928200	6948100
FAS1 domain-containing protein YLR001C	1	8	8	10	1.1439	162780000	84414000	78367000
Uncharacterized glycosyl hydrolase YBR056W	1	13	13	34.1	1.1445	106190000	51810000	54383000
TEF1	1	18	18	51.5	1.1446	8151300000	4080800000	4070500000
ARC35	1	3	3	13.5	1.1451	11162000	5687200	5475100
YGR054W	1	4	4	7.3	1.1466	15962000	7605800	8356000
GPA1	1	9	9	25.6	1.1478	137200000	65812000	71391000
ESS1	1	5	5	40.6	1.1478	47262000	21707000	25554000
RPS7B	1	13	8	72.6	1.1479	235180000	111820000	123370000
VPS35	1	2	2	2.8	1.148	11105000	5953600	5151700
PRE8	1	2	2	11.2	1.1485	6714900	3438200	3276700
YDR415C	1	4	4	10.4	1.1488	73576000	36277000	37299000
RPL32	1	7	7	56.9	1.1502	387620000	193670000	193960000
RPL33A	1	5	1	57	1.1509	135140000	68285000	66857000
MUP1	1	7	7	13.4	1.1538	106690000	50480000	56210000
ADE2	1	3	3	7.2	1.1553	6109500	2888700	3220800
FTH1	1	6	6	16.6	1.1555	719720000	374930000	344780000
LCB4	1	19	19	33.5	1.1555	355830000	178600000	177230000
SBP1	1	8	8	40.8	1.1566	102750000	63653000	39095000
SEC4	1	8	8	44.2	1.1568	255980000	128770000	127210000
ZUO1	1	7	7	23.3	1.1569	134920000	63602000	71322000
TRP5	1	7	7	16	1.1581	19777000	12415000	7361700
LYP1	1	3	3	8.7	1.1582	36625000	18840000	17785000
RPL4B	1	11	4	30.4	1.1585	117680000	62889000	54788000
RPS11B;RPS11A	2	6	6	33.3	1.1588	219050000	114130000	104920000
POB3	1	2	2	5.4	1.1588	4915600	2403100	2512500
CCT8	1	4	4	11.8	1.1601	11459000	5394400	6065000
MSP1	1	3	2	12.2	1.1606	11006000	5856700	5149400
URA2	1	7	7	4.7	1.1611	23665000	11122000	12543000
KRE6	1	3	3	8.9	1.1617	54813000	25180000	29633000
STE3	1	6	6	12.8	1.1622	78873000	38346000	40527000
BFR1	1	21	21	47.2	1.1624	450180000	215960000	234220000
RPL24A	1	10	2	45.2	1.1629	786120000	389150000	396960000
SKG6	1	5	5	13.8	1.163	18208000	9285700	8922700
YPT31	1	7	6	45.3	1.1637	209790000	112520000	97266000
Putative metallophosphoesterase YNL217W	1	10	10	34.4	1.164	593240000	316030000	277200000
DBP2	1	2	2	6.2	1.1645	15842000	7405200	8436500
PMC1	1	31	31	26.9	1.1652	2267300000	1133100000	1134200000
VBA4	1	7	7	13.8	1.1653	90482000	45443000	45039000
ASN1	1	8	7	20.6	1.1655	49779000	25636000	24143000
HYP2	2	6	6	42.7	1.1656	122300000	65105000	57190000
TUM1	1	5	5	17.8	1.1656	15449000	6330900	9117800
RPS7A	1	12	7	72.6	1.1662	149110000	72820000	76289000
PET10	1	11	11	49.8	1.1663	153260000	84297000	68961000
YFR006W	1	6	6	15	1.1673	79291000	39489000	39802000
RPL14B;RPL14A	2	2	2	13.8	1.1685	21671000	8006600	13665000
NYV1	1	6	6	31.2	1.1686	144960000	72416000	72547000
SNQ2	1	6	5	4.9	1.1694	33081000	16519000	16562000
RPS4B;RPS4A	2	11	11	59.4	1.1702	305100000	150380000	154720000
NSP1	1	3	3	6.7	1.1711	12223000	7006800	5216200
GVP36	1	8	8	44.2	1.1712	46933000	27111000	19822000
RPS23B;RPS23A	2	3	3	20.7	1.1715	177260000	88224000	89037000
YEH2	1	3	3	6.9	1.1738	8946100	4807100	4139000
HSP104	1	4	4	5.4	1.174	5970300	2781500	3188800
CSR1	1	5	5	16.9	1.1743	52503000	25915000	26588000
MKT1	1	5	5	10.5	1.175	22267000	16332000	5935200
VNX1	1	7	7	11.1	1.1758	405950000	208620000	197330000
PRT1	1	4	4	6.9	1.176	9082800	4567600	4515200
ASK10	1	2	2	3.3	1.1764	3873900	2022700	1851200
ASC1	1	9	9	31.7	1.1771	60780000	31961000	28819000
RPL19B;RPL19A	2	7	7	43.9	1.1783	1505800000	753310000	752520000
PRE9	1	3	3	19.4	1.179	17759000	8576700	9182100
CDC33	1	6	6	37.6	1.1793	86893000	42683000	44211000
SRP21	1	1	1	11.4	1.1796	8389500	4163400	4226100
AVT7	1	2	2	6.3	1.1797	44700000	23480000	21220000
CPR6	1	4	4	9.7	1.18	18192000	9277700	8913900
JSN1	1	2	2	3.5	1.1802	5596000	2680200	2915800
RPE1	1	3	3	26.5	1.1808	4723800	2150200	2573600
RPS31;RPL40B;RPL40A;UBI4	4	8	8	61.8	1.1813	638980000	310580000	328400000
ITR1	2	8	8	17	1.1826	231240000	112650000	118590000
SEC53	1	4	4	20.5	1.1834	29042000	13726000	15316000
RPL8A	1	18	4	61.7	1.1847	147190000	77026000	70165000
GNP1	1	5	5	9.8	1.1853	68161000	33591000	34570000
RHO5	1	8	8	21.8	1.1861	363900000	192430000	171470000
Probable dipeptidyl peptidase 3	1	2	2	4.9	1.1868	1940100	976190	963920
CAM1	1	3	2	7.7	1.187	5984200	4123100	1861100
PCT1	1	7	7	20.3	1.1874	64113000	29569000	34544000
PAA1	1	3	3	24.6	1.1879	16944000	8037000	8906500
YCK2	1	6	4	12.6	1.1898	2598400000	1369400000	1229000000
HXK2	1	11	10	31.9	1.1904	280740000	142950000	137790000
TRR1	1	8	8	43.3	1.1907	54297000	28148000	26149000
PDX3	1	2	2	11	1.1919	4678700	2456100	2222500
HSC82	1	34	10	54.3	1.1929	899400000	428880000	470520000
PRB1	1	12	12	29.1	1.1943	3182600000	1556700000	1625900000
STM1	1	12	12	64.5	1.1944	516790000	249320000	267480000
VPS21	1	4	4	21.9	1.1945	107540000	53839000	53698000
KHA1	1	3	3	5	1.1959	9583900	5026900	4557000
ILS1	1	3	3	4.5	1.1962	4867300	2237800	2629500
PDR5	1	22	20	18.6	1.1964	581690000	297750000	283940000
RHO2	1	4	4	22.4	1.1969	59531000	30088000	29444000
SAM2	1	10	5	45.8	1.1971	87864000	45211000	42653000
TLG1	1	3	3	20.5	1.1971	32606000	15575000	17031000
RPS14A;RPS14B	2	4	4	32.1	1.1972	73741000	37442000	36298000
PRE10	1	1	1	4.5	1.1984	3415800	1667700	1748100
SER1	1	2	2	11.9	1.1987	5020600	2678900	2341700
DST1	1	3	3	11.7	1.1995	9810100	4832700	4977400
SPE3	1	5	5	21.2	1.2	16634000	8390100	8243500
LAP3	1	6	6	17.8	1.2002	229450000	110410000	119040000
ZEO1	1	16	16	76.1	1.2003	1679100000	843160000	835910000
MBF1	1	8	8	57	1.2004	491520000	247150000	244370000
TMA19	1	7	7	32.3	1.2005	114320000	60311000	54010000
Uncharacterized phosphatase YNL010W	1	3	3	16.2	1.2006	9169400	4631800	4537600
RSP5	1	6	6	11.7	1.2012	102760000	52081000	50676000
PHO90	1	5	5	10.2	1.2019	20214000	9879900	10334000
SMC1	1	3	2	2.9	1.2022	8719700	5004600	3715100
SCW10	1	6	6	17.2	1.2025	137230000	50596000	86634000
TIF5	1	4	4	8.9	1.203	21157000	10215000	10942000
SER3;SER33	2	2	2	7.9	1.2052	7854000	4585900	3268000
RPS16B;RPS16A	2	10	10	62.9	1.2053	149200000	75311000	73886000
MET17	1	8	8	19.4	1.2063	88818000	43151000	45667000
Putative sulfate transporter YPR003C	1	2	2	4	1.207	76935000	38345000	38590000
HTS1	1	4	4	13.2	1.2081	25298000	12305000	12992000
CRP1	1	14	14	28.4	1.2082	744280000	376020000	368250000
SUR7	1	2	2	17.2	1.2088	4986500	2370400	2616200
RPS26A	1	1	1	12.6	1.2099	154320000	71127000	83194000
PRO3	1	3	3	17.8	1.21	15440000	12473000	2966600
SOD1	1	3	3	36.4	1.2111	21984000	10931000	11053000
YMR295C	1	1	1	9.6	1.2115	72867000	35752000	37115000
IPP1	1	12	12	51.9	1.2117	285170000	144390000	140780000
RPS6B;RPS6A	2	10	10	54.7	1.212	321480000	154650000	166830000
GPP2	1	8	3	32.4	1.213	12202000	5741600	6460400
SAM3	1	5	5	14.7	1.2133	61440000	30128000	31313000
VPS24	1	3	3	21.4	1.215	43746000	22888000	20858000
MES1	1	3	3	4.7	1.2155	4676800	2635100	2041700
AMS1	1	6	6	8	1.2175	15552000	6822200	8730300
SEC14	1	7	7	29.3	1.2183	65081000	33718000	31363000
RPL34B	1	6	1	69.4	1.2187	416110000	207290000	208820000
SSZ1	1	11	11	30.1	1.2194	60988000	27700000	33287000
YKT6	1	7	7	33.5	1.2214	98674000	48767000	49907000
SRO9	1	7	7	23.7	1.2222	55853000	26810000	29043000
TEF4	1	8	7	21.8	1.2226	146720000	72880000	73835000
EFT1	1	23	23	34.3	1.2235	1325200000	647840000	677380000
CKB1	1	2	2	12.2	1.2239	11490000	5496100	5994000
PGK1	1	25	25	66.6	1.2247	3044100000	1505100000	1538900000
SSB2;SSB1	2	22	22	61.5	1.2247	4307800000	2079400000	2228400000
HOM6	1	8	8	33.7	1.2251	56104000	26556000	29547000
SEC31	1	3	3	3.3	1.2259	8513900	4187200	4326800
SSA1	1	28	7	60.7	1.2284	375970000	176340000	199630000
CTR1	1	4	4	13.5	1.2288	79255000	37929000	41326000
GOS1	1	2	2	13.9	1.2289	11327000	5744200	5583200
RPS20	1	9	9	63.6	1.2302	485210000	236530000	248670000
RPS9B	1	4	1	26.7	1.2308	95552000	45698000	49854000
SEC1	1	3	3	5.9	1.2308	8499200	3270200	5229000
RPS10A;RPS10B	2	5	5	40	1.2315	83152000	40010000	43142000
BZZ1	1	6	6	12.8	1.2316	43284000	25057000	18227000
DPS1	1	9	9	20.3	1.2319	47429000	22566000	24863000
FAR7	1	2	2	15.8	1.2322	3765300	1881800	1883500
EAR1	1	2	2	5.3	1.2324	14074000	7021800	7052600
TRP2	1	2	2	5.5	1.2331	5070500	2242200	2828200
THR4	1	11	11	29.6	1.2381	115600000	58427000	57174000
EGD1	1	6	6	47.1	1.2382	83730000	28380000	55349000
TDH3	1	19	6	61.7	1.2392	8539000000	4071500000	4467500000
AVT3	1	2	2	3.9	1.2406	11584000	5851900	5732000
GUS1	1	10	10	17.5	1.2417	41519000	20909000	20610000
ARO8	1	9	9	29	1.2418	43369000	21240000	22129000
ARO2	1	10	10	36.4	1.2428	168400000	84502000	83899000
APE1	1	17	17	42	1.244	646480000	309580000	336900000
SSA2	1	32	11	66.8	1.2444	3771300000	1823000000	1948300000
SLM4	1	5	5	58	1.2444	95256000	42755000	52501000
ECM33	1	2	2	5.1	1.2454	741370000	356610000	384760000
RPS1A	1	12	5	45.9	1.2459	881670000	401100000	480580000
SIT1	1	2	2	3.7	1.2461	5782500	2841500	2941000
PDC1	3	16	16	38.5	1.2464	2886200000	1607100000	1279100000
APE4	1	11	11	32.2	1.2466	89833000	44364000	45469000
RPS13	1	2	2	19.9	1.2483	23533000	10775000	12758000
LHP1	1	2	2	13.8	1.2488	3498800	1665400	1833400
RPS24B;RPS24A	2	10	10	80	1.2489	500550000	240700000	259850000
PFK1	1	12	12	20.2	1.2491	105070000	48746000	56323000
FRS1	1	5	5	9.4	1.2503	15578000	7006000	8572200
PGI1	1	16	16	40.1	1.252	473880000	230600000	243280000
ASN2	1	7	6	17.5	1.2525	20761000	8670900	12090000
CCT4	1	4	4	12.5	1.2538	5570600	2750000	2820600
HXT3	1	5	4	12.3	1.2539	94736000	43781000	50955000
SNC2	1	2	2	40.9	1.254	9960500	4700600	5259900
RPL35B;RPL35A	2	9	9	45.8	1.2545	352170000	173710000	178460000
RVS167	1	4	4	15.4	1.2549	39040000	19458000	19582000
MET6	1	25	25	44.1	1.255	231830000	112310000	119520000
YEF3	2	20	20	22.4	1.255	396270000	198480000	197790000
ADH1	2	12	11	38.2	1.2551	1374800000	661640000	713160000
CSI2	1	2	2	12.3	1.2553	18057000	8755000	9301800
ENO2	1	26	15	77.1	1.256	10053000000	4813100000	5240200000
AST1	2	3	3	8.9	1.2583	7100500	3407100	3693300
GPM1	1	15	15	68.8	1.2586	2035400000	967380000	1068100000
EDE1	1	3	3	3.6	1.2599	8615000	4152000	4463100
HYR1	2	3	3	18.4	1.2602	23017000	11649000	11368000
RPS19B;RPS19A	2	7	7	70.8	1.2605	491440000	243110000	248330000
CYS4	1	17	17	49.9	1.2605	108900000	54945000	53952000
RHO3	1	4	4	24.7	1.2611	40752000	19432000	21320000
STE23	1	3	3	3.4	1.2615	5381600	2519800	2861900
PSA1	1	11	11	33.5	1.2617	115540000	53379000	62160000
RAV2	1	3	3	14.2	1.264	10038000	4318500	5719500
BMH2	1	5	2	29.3	1.265	21565000	10176000	11389000
AAH1	1	3	3	9.5	1.2655	5594900	2421400	3173500
RPL38	1	4	4	61.5	1.2667	127130000	60461000	66674000
CYS3	1	3	3	8.9	1.2678	18006000	8666300	9339300
CDC19	1	17	17	45	1.269	994280000	466200000	528080000
HAL5	1	2	2	3.3	1.2695	4254200	2307400	1946800
FAS2	1	33	33	25.9	1.2707	348020000	160080000	187940000
ERG10	1	3	3	11.8	1.2713	45406000	37294000	8111800
SKG1	1	2	2	6.5	1.2715	10036000	4772000	5263800
DAK1	1	4	4	9.4	1.2723	7738300	4019200	3719100
EMC4	1	3	3	23.7	1.2727	62378000	32744000	29634000
HIS7	1	2	2	5.4	1.2731	10169000	4627900	5541000
TPI1	1	9	9	64.1	1.2742	661010000	311270000	349740000
SUI3	1	2	2	14.7	1.2744	3161200	1678400	1482800
RPB2	1	3	3	3.9	1.2751	18493000	8366000	10127000
SPT6	1	3	3	3.4	1.2754	4805700	2304700	2501000
HRI1	1	2	2	11.9	1.2759	7278600	3504700	3773900
XRN1	1	10	10	10.3	1.2762	32922000	14849000	18073000
PMI40	1	5	5	16.8	1.2763	32644000	15876000	16768000
CPR1	1	10	9	55.6	1.2767	722660000	360910000	361750000
GDH1	1	6	6	15.4	1.2777	44079000	23093000	20986000
GDI1	1	8	8	24.6	1.2793	105140000	59312000	45830000
RSA4	1	2	2	7	1.2807	20372000	9507100	10865000
FTR1	1	3	3	6.2	1.282	98639000	48443000	50195000
THI7	3	3	3	6	1.2828	11139000	4787100	6352400
RPS15	1	2	2	15.5	1.2851	62473000	31341000	31131000
YPT52	1	3	3	15	1.2867	75190000	35016000	40174000
OLA1	1	5	5	17.5	1.2893	60506000	30366000	30140000
IMD2;IMD1	2	10	4	26.6	1.2906	38249000	14731000	23518000
MRH1	1	3	3	12.8	1.2907	1315800000	594410000	721410000
FAS1	1	28	28	18.6	1.2911	178630000	84851000	93783000
ERG20	1	8	8	25.9	1.293	82997000	39196000	43800000
WRS1	1	3	3	13.9	1.2943	11934000	5195900	6737900
TMA20	1	2	2	15.5	1.295	37406000	20425000	16982000
TDH2	1	16	2	59.3	1.2957	237640000	113930000	123710000
PDR15	1	2	1	1.6	1.2963	50881000	23249000	27633000
CAJ1	1	4	4	16.1	1.2979	16994000	7828300	9165300
RPP2B	1	2	2	11.8	1.3022	3908900	1757400	2151500
ALD6	1	14	14	35.4	1.3046	374250000	178810000	195440000
GTR1	1	2	2	8.1	1.3047	3787500	1876500	1910900
ARC1	1	8	8	22.6	1.3073	48667000	24477000	24190000
TKL1	1	16	16	28.7	1.3077	439240000	197100000	242140000
RPS27B;RPS27A	2	3	3	50	1.3096	650230000	311200000	339020000
SAH1	1	15	15	36.7	1.3103	352960000	166110000	186840000
ATG26	1	3	3	3.6	1.3123	4619600	1994800	2624900
NAP1	1	2	2	7.4	1.3132	4613100	2359700	2253400
SSO1	1	5	4	25.2	1.3144	373650000	175270000	198380000
YPR1	1	6	6	26.3	1.3144	13606000	7682300	5923400
DED81	1	5	5	13.4	1.3151	28423000	13279000	15145000
PFK2	1	7	7	11.5	1.3152	53428000	24645000	28783000
ENO1	1	20	9	62.5	1.3157	223550000	107330000	116230000
SFH5	1	2	2	10.2	1.3172	4665000	2047000	2618000
RPS3	1	3	3	20.4	1.3196	211700000	103040000	108660000
GND1	2	9	9	23.5	1.3254	82268000	37494000	44774000
UBP3	1	3	3	3.6	1.326	6857900	2823900	4034000
HOM2	1	5	5	20	1.3262	18061000	8326300	9734300
TAL1	1	14	14	54.3	1.3269	210540000	98802000	111740000
ERG13	1	8	8	23.8	1.3271	34254000	15369000	18885000
HRK1	1	4	4	6.6	1.3289	28611000	18852000	9759300
SES1	1	7	7	19.9	1.3297	257070000	30360000	226710000
ATG19	1	2	2	8.7	1.3306	15045000	7615100	7429500
BMH1	1	6	3	35.2	1.3324	97676000	47119000	50557000
PEP12	1	2	2	11.8	1.3387	5880600	2684800	3195800
HSP82	1	27	3	46.3	1.3391	20511000	9142900	11368000
KRS1	1	4	4	10.2	1.3421	35944000	16508000	19436000
HXT1	1	4	3	9.6	1.3424	215940000	104370000	111560000
OSH2	1	5	5	4.4	1.3434	25215000	11908000	13307000
RAS1	1	4	4	22	1.3446	28064000	12250000	15814000
MVD1	1	2	2	10.6	1.3458	12062000	5821300	6240700
Uncharacterized protein YNL208W	1	1	1	8	1.348	23352000	10965000	12387000
PDR12	1	8	7	7.2	1.3481	228720000	102950000	125780000
WTM1	1	4	4	15.1	1.3525	15206000	6846400	8360000
PRS3	1	2	2	10.9	1.353	4470500	1988100	2482400
ACS2	1	6	6	12.2	1.3594	140840000	76215000	64625000
Uncharacterized membrane protein YML131W	1	4	4	13.2	1.3608	7996700	3606400	4390300
RPS1B	1	12	5	50.6	1.365	93387000	45225000	48163000
SSE1	1	25	22	41	1.365	522020000	266200000	255820000
YBL029C-A	1	1	1	11.7	1.3666	34218000	15655000	18563000
RAS2	1	10	10	50.9	1.3668	294140000	132860000	161270000
Uncharacterized oxidoreductase YMR226C	1	7	7	34.8	1.3689	12840000	5644300	7195600
ENV7	1	2	2	5.2	1.372	83251000	43824000	39427000
INO1	1	5	5	13.1	1.3736	44567000	21452000	23115000
SYP1	1	4	4	7	1.3846	17187000	8055100	9131500
YPK1	1	2	2	4.7	1.3899	7033500	2980900	4052600
RPN1	1	4	4	5.8	1.3906	25861000	10061000	15800000
THS1	1	6	6	11.7	1.3925	35136000	16600000	18536000
Uncharacterized protein YBR016W	1	2	2	24.2	1.3925	58446000	26434000	32012000
YPL199C	1	3	3	11.2	1.3927	75378000	35144000	40234000
SVF1	1	3	3	7.7	1.394	8483500	4274900	4208600
STI1	1	13	13	27.3	1.3953	71893000	30471000	41421000
RPS29A	1	3	3	64.3	1.3955	60267000	28180000	32088000
TIF34	1	5	5	24.8	1.4073	20224000	9617600	10607000
ADO1	1	10	10	45.6	1.4099	125990000	56749000	69240000
CAR1	1	2	2	7.5	1.4147	2997300	1188600	1808800
PAR32	1	4	4	18	1.4148	28912000	13835000	15077000
MDG1	1	3	3	7.9	1.4163	29240000	15072000	14168000
GSC2	1	11	4	8.8	1.4254	23933000	9834000	14099000
SLA1	1	4	4	5.1	1.4268	28506000	14433000	14074000
CLU1	1	2	2	2.5	1.4352	2852800	1138200	1714600
TPO2	1	1	1	3.7	1.442	13777000	6458000	7319300
RPN7	1	3	3	10.3	1.4475	9052200	4159400	4892800
APL3	1	3	3	5.1	1.4507	15262000	7222100	8040200
NPT1	1	4	4	13.8	1.4599	7474800	3385000	4089800
YCK1	1	5	3	14.3	1.4618	30253000	13865000	16388000
MYO3	1	6	4	5.7	1.462	48454000	23655000	24799000
PMA1;PMA2	2	24	24	29	1.4647	5371800000	2395100000	2976700000
YGR266W	1	3	3	4.6	1.467	27030000	12160000	14870000
PST2	1	5	5	23.2	1.4858	210200000	92644000	117550000
YCP4	1	8	8	41.7	1.4866	304510000	134060000	170460000
NUM1	1	5	5	10.7	1.4879	40965000	16465000	24499000
TDH1	1	13	8	67.8	1.4996	63530000	35731000	27799000
RPL18B;RPL18A	2	2	2	17.2	1.4998	25627000	10991000	14637000
OYE2	1	4	4	15.5	1.5037	64963000	29435000	35528000
Uncharacterized protein YGL108C	1	2	2	17.1	1.5089	12690000	5108000	7582000
MRPS16	1	3	3	38.8	1.5295	10324000	2501900	7822400
Uncharacterized protein YKL063C	1	1	1	8.4	1.5371	14893000	6821500	8071200
LSP1	1	8	8	29.3	1.5476	297250000	130260000	166990000
PIL1	1	6	6	34.5	1.5616	242580000	128490000	114090000
RFS1	1	5	5	33.3	1.5778	23921000	10422000	13499000
CHC1	1	5	5	4.5	1.5805	19431000	8625300	10805000
SSO2	1	4	3	24.7	1.5984	142250000	58644000	83604000
Uncharacterized protein YNL134C	1	9	9	29.5	1.6164	64942000	27068000	37873000
RPN5	1	2	2	6.5	1.6292	5253000	2071400	3181600
RPL37B	1	3	2	33	1.996	21211000	10204000	11007000
ARP3	1	4	4	21.2	2.014	101170000	10988000	90182000
RPL37A	1	3	2	33	2.0503	234790000	80653000	154140000
GPA2	1	2	2	5.3	2.091	13352000	5574100	7777800
KAP123	1	6	6	6.7	2.1746	22192000	4535800	17656000
ERP4	1	4	3	23.7	2.7711	27035000	8271300	18764000
